# Supplementary material for: Potential Small Molecules for Therapy of Lupus Nephritis Based on Genetic Effect and Immune Infiltration
Source: Biomed Res Int. 2022 Apr 23;2022:2259164. doi: 10.1155/2022/2259164 (PMC9056222; doi:10.1155/2022/2259164)
Supplement: Supplementary Materials — Supplementary Table1: the expression data of GSE32591, which contains 32 glomeruli and tubulointerstitum tissues of LN patients and 14 glomeruli tissues and 15 tubulointerstitum tissues of healthy controls. Supplementary Table2: the expression data of GSE112943 consists of formalin fixed paraffin-embedded kidneys (14 lupus nephritis and 7 control kidney). Supplementary Table3: the data of the relationships between Nine chemicals, 23 hub genes and lupus nephritis. Supplementary Table4: the degree of 23 hub genes in the network between small molecules and genes and the description and function of 23 hub genes. Supplementary Table5: all the data of small molecules based on the 23 hub genes from the DSigDB database. Supplementary Table6: the relationship of nine potential small molecules and 7 common effective drugs for LN were found in the DREIMT database. [file 2259164.f1.zip]

Archive with 6 entries (6 files):
- Supplementary Table 4.txt
- Supplementary Table1.txt
- Supplementary Table2.txt
- Supplementary Table3.txt
- Supplementary Table5.txt
- Supplementary Table6.txt
