# Supplementary material for: Potential Small Molecules for Therapy of Lupus Nephritis Based on Genetic Effect and Immune Infiltration
Source: Biomed Res Int. 2022 Apr 23;2022:2259164. doi: 10.1155/2022/2259164 (PMC9056222; doi:10.1155/2022/2259164)
Supplement: Supplementary Materials — Supplementary Table1: the expression data of GSE32591, which contains 32 glomeruli and tubulointerstitum tissues of LN patients and 14 glomeruli tissues and 15 tubulointerstitum tissues of healthy controls. Supplementary Table2: the expression data of GSE112943 consists of formalin fixed paraffin-embedded kidneys (14 lupus nephritis and 7 control kidney). Supplementary Table3: the data of the relationships between Nine chemicals, 23 hub genes and lupus nephritis. Supplementary Table4: the degree of 23 hub genes in the network between small molecules and genes and the description and function of 23 hub genes. Supplementary Table5: all the data of small molecules based on the 23 hub genes from the DSigDB database. Supplementary Table6: the relationship of nine potential small molecules and 7 common effective drugs for LN were found in the DREIMT database. [file 2259164.f1.zip › Supplementary Table 4.txt]

Gene	Degree	Description	Function
IFI27	6	Interferon alpha-inducible protein 27	Mediates IFN-induced apoptosis characterized by a rapid and robust release of cytochrome C from the mitochondria and activation of BAX and caspases 2, 3, 6, 8 and 9
IFIH1	6	Interferon-induced helicase C domain-containing protein 1	Innate immune receptor which acts as a cytoplasmic sensor of viral nucleic acids and plays a major role in sensing viral infection and in the activation of a cascade of antiviral responses including the induction of type I interferons and proinflammatory cytokines.
MX1	6	Interferon-induced GTP-binding protein Mx1	Interferon-induced dynamin-like GTPase with antiviral activity against a wide range of RNA viruses and some DNA viruses.
IFI6	5	Interferon alpha-inducible protein 6	Plays a role in apoptosis, negatively regulating the intrinsinc apoptotic signaling pathway and TNFSF10-induced apoptosis . However, it has also been shown to have a pro-apoptotic activity .
IFI44	5	Interferon-induced protein 44	This protein aggregates to form microtubular structures; Belongs to the IFI44 family
IFIT3	5	nterferon-induced protein with tetratricopeptide repeats 3	IFN-induced antiviral protein which acts as an inhibitor of cellular as well as viral processes, cell migration, proliferation, signaling, and viral replication.
OAS1	5	2'-5'-oligoadenylate synthetase 1; 2'-5'-oligoadenylate synthase 1	Interferon-induced, dsRNA-activated antiviral enzyme which plays a critical role in cellular innate antiviral response. In addition, it may also play a role in other cellular processes such as apoptosis, cell growth, differentiation and gene regulation.
RSAD2	5	Radical S-adenosyl methionine domain-containing protein 2	Interferon-inducible iron-sulfur (4FE-4S) cluster- binding antiviral protein which plays a major role in the cell antiviral state induced by type I and type II interferon.
DDX58	4	Probable ATP-dependent RNA helicase DDX58	Innate immune receptor which acts as a cytoplasmic sensor of viral nucleic acids and plays a major role in sensing viral infection and in the activation of a cascade of antiviral responses including the induction of type I interferons and proinflammatory cytokines.
IFI44L	3	Interferon-induced protein 44-like	Exhibits a low antiviral activity against hepatitis C virus; Belongs to the IFI44 family
HERC6	3	Probable E3 ubiquitin-protein ligase HERC6	E3 ubiquitin-protein ligase which accepts ubiquitin from an E2 ubiquitin-conjugating enzyme in the form of a thioester and then directly transfers the ubiquitin to targeted substrates
IFIT2	3	Interferon-induced protein with tetratricopeptide repeats 2	IFN-induced antiviral protein which inhibits expression of viral messenger RNAs lacking 2'-O-methylation of the 5' cap. The ribose 2'-O-methylation would provide a molecular signature to distinguish between self and non-self mRNAs by the host during viral infection.
IFITM1	3	Interferon-induced transmembrane protein 1	IFN-induced antiviral protein which inhibits the entry of viruses to the host cell cytoplasm, permitting endocytosis, but preventing subsequent viral fusion and release of viral contents into the cytosol.
MX2	2	Interferon-induced GTP-binding protein Mx2	Interferon-induced dynamin-like GTPase with potent antiviral activity against human immunodeficiency virus type 1 (HIV-1). Acts by targeting the viral capsid and affects the nuclear uptake and/or stability of the HIV-1 replication complex and the subsequent chromosomal integration of the proviral DNA. Exhibits antiviral activity also against simian immunodeficiency virus (SIV-mnd). May play a rol…
IFITM3	2	Interferon-induced transmembrane protein 3	IFN-induced antiviral protein which disrupts intracellular cholesterol homeostasis.
PLSCR1	2	Phospholipid scramblase 1	May mediate accelerated ATP-independent bidirectional transbilayer migration of phospholipids upon binding calcium ions that results in a loss of phospholipid asymmetry in the plasma membrane. May play a central role in the initiation of fibrin clot formation, in the activation of mast cells and in the recognition of apoptotic and injured cells by the reticuloendothelial system
RTP4	2	Receptor-transporting protein 4	May mediate accelerated ATP-independent bidirectional transbilayer migration of phospholipids upon binding calcium ions that results in a loss of phospholipid asymmetry in the plasma membrane. May play a central role in the initiation of fibrin clot formation, in the activation of mast cells and in the recognition of apoptotic and injured cells by the reticuloendothelial system
XAF1	1	XIAP-associated factor 1	Seems to function as a negative regulator of members of the IAP (inhibitor of apoptosis protein) family. Inhibits anti- caspase activity of BIRC4. Induces cleavage and inactivation of BIRC4 independent of caspase activation. Mediates TNF-alpha- induced apoptosis and is involved in apoptosis in trophoblast cells. May inhibit BIRC4 indirectly by activating the mitochondrial apoptosis pathway.
IFI16	1	Gamma-interferon-inducible protein 16	Binds double-stranded DNA. Binds preferentially to supercoiled DNA and cruciform DNA structures. Seems to be involved in transcriptional regulation. May function as a transcriptional repressor. Could have a role in the regulation of hematopoietic differentiation through activation of unknown target genes. Controls cellular proliferation by modulating the functions of cell cycle regulatory factors…
EIF2AK2	1	Interferon-induced, double-stranded RNA-activated protein kinase	IFN-induced dsRNA-dependent serine/threonine-protein kinase which plays a key role in the innate immune response to viral infection and is also involved in the regulation of signal transduction, apoptosis, cell proliferation and differentiation.
TRIM22	1	E3 ubiquitin-protein ligase TRIM22	Interferon-induced antiviral protein involved in cell innate immunity.
PARP12	1	poly(ADP-ribose) polymerase family member 12	enables NAD+ ADP-ribosyltransferase activity，enables RNA binding，enables metal ion binding，enables protein ADP-ribosylase activity
DDX60	1	Probable ATP-dependent RNA helicase DDX60	Positively regulates DDX58/RIG-I- and IFIH1/MDA5- dependent type I interferon and interferon inducible gene expression in response to viral infection. Binds ssRNA, dsRNA and dsDNA and can promote the binding of DDX58/RIG-I to dsRNA. Exhibits antiviral activity against hepatitis C virus and vesicular stomatitis virus (VSV); Belongs to the helicase family
