# Supplementary material for: Potential Small Molecules for Therapy of Lupus Nephritis Based on Genetic Effect and Immune Infiltration
Source: Biomed Res Int. 2022 Apr 23;2022:2259164. doi: 10.1155/2022/2259164 (PMC9056222; doi:10.1155/2022/2259164)
Supplement: Supplementary Materials — Supplementary Table1: the expression data of GSE32591, which contains 32 glomeruli and tubulointerstitum tissues of LN patients and 14 glomeruli tissues and 15 tubulointerstitum tissues of healthy controls. Supplementary Table2: the expression data of GSE112943 consists of formalin fixed paraffin-embedded kidneys (14 lupus nephritis and 7 control kidney). Supplementary Table3: the data of the relationships between Nine chemicals, 23 hub genes and lupus nephritis. Supplementary Table4: the degree of 23 hub genes in the network between small molecules and genes and the description and function of 23 hub genes. Supplementary Table5: all the data of small molecules based on the 23 hub genes from the DSigDB database. Supplementary Table6: the relationship of nine potential small molecules and 7 common effective drugs for LN were found in the DREIMT database. [file 2259164.f1.zip › Supplementary Table1.txt]

!Series_title	Expression data from human with lupus nephritis (LN)
!Series_geo_accession	GSE32591
!Series_status	Public on Jun 28 2012
!Series_submission_date	Oct 04 2011
!Series_last_update_date	Nov 29 2012
!Series_pubmed_id	22723521
!Series_summary	Nephritis (LN) is a serious manifestation of SLE. Therapeutic studies in mouse LN models do not always predict outcomes of human therapeutic trials, raising concerns about the human relevance of these models. In this study we used an unbiased transcriptional network approach to define similarities and differences between three lupus models and human LN. Affymetrix-based expression profiles were a…
!Series_summary	We used microarrays to analyze the transcriptome of microdissected renal biopsies from patients with lupus nephritis (LN)
!Series_overall_design	RNA from glomeruli and tubulointerstitial compartments was extracted and processed for hybridization on Affymetrix microarrays.
!Series_type	Expression profiling by array
!Series_contributor	Celine,C,Berthier
!Series_contributor	Ramalingam,,Bethunaickan
!Series_contributor	Tania,,Gonzalez-Rivera
!Series_contributor	Viji,,Nair
!Series_contributor	Meera,,Ramanujam
!Series_contributor	Weija,,Zhang
!Series_contributor	Erwin,P,Bottinger
!Series_contributor	Stephan,,Segerer
!Series_contributor	Maja,,Lindenmeyer
!Series_contributor	Clemens,D,Cohen
!Series_contributor	Anne,,Davidson
!Series_contributor	Matthias,,Kretzler
!Series_sample_id	GSM807842 GSM807843 GSM807844 GSM807845 GSM807846 GSM807847 GSM807848 GSM807849 GSM807850 GSM807851 GSM807852 GSM807853 GSM807854 GSM807855 GSM807856 GSM807857 GSM807858 GSM807859 GSM807860 GSM807861 GSM807862 GSM807863 GSM807864 GSM807865 GSM807866 GSM807867 GSM807868 GSM807869 GSM807870 GSM807871 GSM807872 GSM807873 GSM807874 GSM807875 GSM807876 GSM807877 GSM807878 GSM807879 GSM807880 GSM807881…
!Series_contact_name	Celine,C,Berthier
!Series_contact_institute	University of Michigan
!Series_contact_address	1150 W. Medical Center Dr, MSRB2
!Series_contact_city	Ann Arbor
!Series_contact_state	MI
!Series_contact_zip/postal_code	48109
!Series_contact_country	USA
!Series_supplementary_file	ftp://ftp.ncbi.nlm.nih.gov/geo/series/GSE32nnn/GSE32591/suppl/GSE32591_RAW.tar
!Series_supplementary_file	ftp://ftp.ncbi.nlm.nih.gov/geo/series/GSE32nnn/GSE32591/suppl/GSE32591_matrix_glomeruli.txt.gz
!Series_supplementary_file	ftp://ftp.ncbi.nlm.nih.gov/geo/series/GSE32nnn/GSE32591/suppl/GSE32591_matrix_tubulointerstitium.txt.gz
!Series_platform_id	GPL14663
!Series_platform_taxid	9606
!Series_sample_taxid	9606
!Series_relation	SubSeries of: GSE32592
!Series_relation	BioProject: https://www.ncbi.nlm.nih.gov/bioproject/PRJNA154457
!Sample_title	Tub_LN_301	Tub_LN_302	Tub_LN_304	Tub_LN_305	Tub_LN_306	Tub_LN_307	Tub_LN_308	Tub_LN_309	Tub_LN_310	Tub_LN_311	Tub_LN_312	Tub_LN_313	Tub_LN_314	Tub_LN_318	Tub_LN_319	Tub_LN_323	Tub_LN_329	Tub_LN_336	Tub_LN_338	Tub_LN_340	Tub_LN_342	Tub_LN_343	Tub_LN_346	Tub_LN_348	Tub_LN_349	Tub_LN_352	Tub_LN_357	Tub_LN_358	Tub_LN_359	Tub_LN_360	Tub_LN_361	Tub_LN_362	Tub_LD_363	Tub_LD_364	Tub_LD_365	Tub_LD_366	Tub_LD_367	Tub_LD_368	Tub_LD_369	Tub_LD_370	Tub_LD_371	Tub_LD_373	Tub_LD_374	Tub_LD_375	Tub_LD_376	Tub_LD_377	Tub_LD_378	Glom_LN_401	Glom_LN_402
!Sample_geo_accession	GSM807842	GSM807843	GSM807844	GSM807845	GSM807846	GSM807847	GSM807848	GSM807849	GSM807850	GSM807851	GSM807852	GSM807853	GSM807854	GSM807855	GSM807856	GSM807857	GSM807858	GSM807859	GSM807860	GSM807861	GSM807862	GSM807863	GSM807864	GSM807865	GSM807866	GSM807867	GSM807868	GSM807869	GSM807870	GSM807871	GSM807872	GSM807873	GSM807874	GSM807875	GSM807876	GSM807877	GSM807878	GSM807879	GSM807880	GSM807881	GSM807882	GSM807883	GSM807884	GSM807885	GSM807886	GSM807887	GSM807888	GSM807889	GSM807890
!Sample_status	Public on Jun 28 2012	Public on Jun 28 2012	Public on Jun 28 2012	Public on Jun 28 2012	Public on Jun 28 2012	Public on Jun 28 2012	Public on Jun 28 2012	Public on Jun 28 2012	Public on Jun 28 2012	Public on Jun 28 2012	Public on Jun 28 2012	Public on Jun 28 2012	Public on Jun 28 2012	Public on Jun 28 2012	Public on Jun 28 2012	Public on Jun 28 2012	Public on Jun 28 2012	Public on Jun 28 2012	Public on Jun 28 2012	Public on Jun 28 2012	Public on Jun 28 2012	Public on Jun 28 2012	Public on Jun 28 2012	Public on Jun 28 2012	Public on Jun 28 2012	Public on Jun 28 2012	Public on Jun 28 2012	Public on Jun 28 2012	Public on Jun 28 2012	Public on Jun 28 2012	Public on Jun 28 2012	Public on Jun 28 2012	Public on Jun 28 2012	Public on Jun 28 2012	Public on Jun 28 2012	Public on Jun 28 2012	Public on Jun 28 2012	Public on Jun 28 2012	Public on Jun 28 2012	Public on Jun 28 2012	Public on Jun 28 2012	Public on Jun 28 2012	Public on Jun 28 2012	Public on Jun 28 2012	Public on Jun 28 2012	Public on Jun 28 2012	Public on Jun 28 2012	Public on Jun 28 2012	Public on Jun 28 2012
!Sample_submission_date	Oct 04 2011	Oct 04 2011	Oct 04 2011	Oct 04 2011	Oct 04 2011	Oct 04 2011	Oct 04 2011	Oct 04 2011	Oct 04 2011	Oct 04 2011	Oct 04 2011	Oct 04 2011	Oct 04 2011	Oct 04 2011	Oct 04 2011	Oct 04 2011	Oct 04 2011	Oct 04 2011	Oct 04 2011	Oct 04 2011	Oct 04 2011	Oct 04 2011	Oct 04 2011	Oct 04 2011	Oct 04 2011	Oct 04 2011	Oct 04 2011	Oct 04 2011	Oct 04 2011	Oct 04 2011	Oct 04 2011	Oct 04 2011	Oct 04 2011	Oct 04 2011	Oct 04 2011	Oct 04 2011	Oct 04 2011	Oct 04 2011	Oct 04 2011	Oct 04 2011	Oct 04 2011	Oct 04 2011	Oct 04 2011	Oct 04 2011	Oct 04 2011	Oct 04 2011	Oct 04 2011	Oct 04 2011	Oct 04 2011
!Sample_last_update_date	Jun 28 2012	Jun 28 2012	Jun 28 2012	Jun 28 2012	Jun 28 2012	Jun 28 2012	Jun 28 2012	Jun 28 2012	Jun 28 2012	Jun 28 2012	Jun 28 2012	Jun 28 2012	Jun 28 2012	Jun 28 2012	Jun 28 2012	Jun 28 2012	Jun 28 2012	Jun 28 2012	Jun 28 2012	Jun 28 2012	Jun 28 2012	Jun 28 2012	Jun 28 2012	Jun 28 2012	Jun 28 2012	Jun 28 2012	Jun 28 2012	Jun 28 2012	Jun 28 2012	Jun 28 2012	Jun 28 2012	Jun 28 2012	Jun 28 2012	Jun 28 2012	Jun 28 2012	Jun 28 2012	Jun 28 2012	Jun 28 2012	Jun 28 2012	Jun 28 2012	Jun 28 2012	Jun 28 2012	Jun 28 2012	Jun 28 2012	Jun 28 2012	Jun 28 2012	Jun 28 2012	Jun 28 2012	Jun 28 2012
!Sample_type	RNA	RNA	RNA	RNA	RNA	RNA	RNA	RNA	RNA	RNA	RNA	RNA	RNA	RNA	RNA	RNA	RNA	RNA	RNA	RNA	RNA	RNA	RNA	RNA	RNA	RNA	RNA	RNA	RNA	RNA	RNA	RNA	RNA	RNA	RNA	RNA	RNA	RNA	RNA	RNA	RNA	RNA	RNA	RNA	RNA	RNA	RNA	RNA	RNA
!Sample_channel_count	1	1	1	1	1	1	1	1	1	1	1	1	1	1	1	1	1	1	1	1	1	1	1	1	1	1	1	1	1	1	1	1	1	1	1	1	1	1	1	1	1	1	1	1	1	1	1	1	1
!Sample_source_name_ch1	Tubulointerstitium from LN patient	Tubulointerstitium from LN patient	Tubulointerstitium from LN patient	Tubulointerstitium from LN patient	Tubulointerstitium from LN patient	Tubulointerstitium from LN patient	Tubulointerstitium from LN patient	Tubulointerstitium from LN patient	Tubulointerstitium from LN patient	Tubulointerstitium from LN patient	Tubulointerstitium from LN patient	Tubulointerstitium from LN patient	Tubulointerstitium from LN patient	Tubulointerstitium from LN patient	Tubulointerstitium from LN patient	Tubulointerstitium from LN patient	Tubulointerstitium from LN patient	Tubulointerstitium from LN patient	Tubulointerstitium from LN patient	Tubulointerstitium from LN patient	Tubulointerstitium from LN patient	Tubulointerstitium from LN patient	Tubulointerstitium from LN patient	Tubulointerstitium from LN patient	Tubulointerstitium from LN patient	Tubulointerstitium from LN patient	Tubulointerstitium from LN patient	Tubulointerstitium from LN patient	Tubulointerstitium from LN patient	Tubulointerstitium from LN patient	Tubulointerstitium from LN patient	Tubulointerstitium from LN patient	Tubulointerstitium from control living donor	Tubulointerstitium from control living donor	Tubulointerstitium from control living donor	Tubulointerstitium from control living donor	Tubulointerstitium from control living donor	Tubulointerstitium from control living donor	Tubulointerstitium from control living donor	Tubulointerstitium from control living donor	Tubulointerstitium from control living donor	Tubulointerstitium from control living donor	Tubulointerstitium from control living donor	Tubulointerstitium from control living donor	Tubulointerstitium from control living donor	Tubulointerstitium from control living donor	Tubulointerstitium from control living donor	Glomeruli from LN patient	Glomeruli from LN patient
!Sample_organism_ch1	Homo sapiens	Homo sapiens	Homo sapiens	Homo sapiens	Homo sapiens	Homo sapiens	Homo sapiens	Homo sapiens	Homo sapiens	Homo sapiens	Homo sapiens	Homo sapiens	Homo sapiens	Homo sapiens	Homo sapiens	Homo sapiens	Homo sapiens	Homo sapiens	Homo sapiens	Homo sapiens	Homo sapiens	Homo sapiens	Homo sapiens	Homo sapiens	Homo sapiens	Homo sapiens	Homo sapiens	Homo sapiens	Homo sapiens	Homo sapiens	Homo sapiens	Homo sapiens	Homo sapiens	Homo sapiens	Homo sapiens	Homo sapiens	Homo sapiens	Homo sapiens	Homo sapiens	Homo sapiens	Homo sapiens	Homo sapiens	Homo sapiens	Homo sapiens	Homo sapiens	Homo sapiens	Homo sapiens	Homo sapiens	Homo sapiens
!Sample_characteristics_ch1	patient number: 1	patient number: 2	patient number: 3	patient number: 4	patient number: 5	patient number: 6	patient number: 7	patient number: 8	patient number: 9	patient number: 10	patient number: 11	patient number: 12	patient number: 13	patient number: 14	patient number: 15	patient number: 16	patient number: 17	patient number: 18	patient number: 19	patient number: 20	patient number: 21	patient number: 22	patient number: 23	patient number: 24	patient number: 25	patient number: 26	patient number: 27	patient number: 28	patient number: 29	patient number: 30	patient number: 31	patient number: 32	patient number: 1	patient number: 2	patient number: 3	patient number: 4	patient number: 5	patient number: 6	patient number: 7	patient number: 8	patient number: 9	patient number: 10	patient number: 11	patient number: 12	patient number: 13	patient number: 14	patient number: 15	patient number: 1	patient number: 2
!Sample_characteristics_ch1	disease status: LN patient	disease status: LN patient	disease status: LN patient	disease status: LN patient	disease status: LN patient	disease status: LN patient	disease status: LN patient	disease status: LN patient	disease status: LN patient	disease status: LN patient	disease status: LN patient	disease status: LN patient	disease status: LN patient	disease status: LN patient	disease status: LN patient	disease status: LN patient	disease status: LN patient	disease status: LN patient	disease status: LN patient	disease status: LN patient	disease status: LN patient	disease status: LN patient	disease status: LN patient	disease status: LN patient	disease status: LN patient	disease status: LN patient	disease status: LN patient	disease status: LN patient	disease status: LN patient	disease status: LN patient	disease status: LN patient	disease status: LN patient	disease status: control	disease status: control	disease status: control	disease status: control	disease status: control	disease status: control	disease status: control	disease status: control	disease status: control	disease status: control	disease status: control	disease status: control	disease status: control	disease status: control	disease status: control	disease status: LN patient	disease status: LN patient
!Sample_characteristics_ch1	tissue: Tubulointerstitium from kidney biopsy	tissue: Tubulointerstitium from kidney biopsy	tissue: Tubulointerstitium from kidney biopsy	tissue: Tubulointerstitium from kidney biopsy	tissue: Tubulointerstitium from kidney biopsy	tissue: Tubulointerstitium from kidney biopsy	tissue: Tubulointerstitium from kidney biopsy	tissue: Tubulointerstitium from kidney biopsy	tissue: Tubulointerstitium from kidney biopsy	tissue: Tubulointerstitium from kidney biopsy	tissue: Tubulointerstitium from kidney biopsy	tissue: Tubulointerstitium from kidney biopsy	tissue: Tubulointerstitium from kidney biopsy	tissue: Tubulointerstitium from kidney biopsy	tissue: Tubulointerstitium from kidney biopsy	tissue: Tubulointerstitium from kidney biopsy	tissue: Tubulointerstitium from kidney biopsy	tissue: Tubulointerstitium from kidney biopsy	tissue: Tubulointerstitium from kidney biopsy	tissue: Tubulointerstitium from kidney biopsy	tissue: Tubulointerstitium from kidney biopsy	tissue: Tubulointerstitium from kidney biopsy	tissue: Tubulointerstitium from kidney biopsy	tissue: Tubulointerstitium from kidney biopsy	tissue: Tubulointerstitium from kidney biopsy	tissue: Tubulointerstitium from kidney biopsy	tissue: Tubulointerstitium from kidney biopsy	tissue: Tubulointerstitium from kidney biopsy	tissue: Tubulointerstitium from kidney biopsy	tissue: Tubulointerstitium from kidney biopsy	tissue: Tubulointerstitium from kidney biopsy	tissue: Tubulointerstitium from kidney biopsy	tissue: Tubulointerstitium from kidney biopsy	tissue: Tubulointerstitium from kidney biopsy	tissue: Tubulointerstitium from kidney biopsy	tissue: Tubulointerstitium from kidney biopsy	tissue: Tubulointerstitium from kidney biopsy	tissue: Tubulointerstitium from kidney biopsy	tissue: Tubulointerstitium from kidney biopsy	tissue: Tubulointerstitium from kidney biopsy	tissue: Tubulointerstitium from kidney biopsy	tissue: Tubulointerstitium from kidney biopsy	tissue: Tubulointerstitium from kidney biopsy	tissue: Tubulointerstitium from kidney biopsy	tissue: Tubulointerstitium from kidney biopsy	tissue: Tubulointerstitium from kidney biopsy	tissue: Tubulointerstitium from kidney biopsy	tissue: Glomeruli from kidney biopsy	tissue: Glomeruli from kidney biopsy
!Sample_molecule_ch1	total RNA	total RNA	total RNA	total RNA	total RNA	total RNA	total RNA	total RNA	total RNA	total RNA	total RNA	total RNA	total RNA	total RNA	total RNA	total RNA	total RNA	total RNA	total RNA	total RNA	total RNA	total RNA	total RNA	total RNA	total RNA	total RNA	total RNA	total RNA	total RNA	total RNA	total RNA	total RNA	total RNA	total RNA	total RNA	total RNA	total RNA	total RNA	total RNA	total RNA	total RNA	total RNA	total RNA	total RNA	total RNA	total RNA	total RNA	total RNA	total RNA
!Sample_extract_protocol_ch1	Total RNA was isolated using the RNeasy mini kit from Qiagen, following the manufacturer’s instructions.	Total RNA was isolated using the RNeasy mini kit from Qiagen, following the manufacturer’s instructions.	Total RNA was isolated using the RNeasy mini kit from Qiagen, following the manufacturer’s instructions.	Total RNA was isolated using the RNeasy mini kit from Qiagen, following the manufacturer’s instructions.	Total RNA was isolated using the RNeasy mini kit from Qiagen, following the manufacturer’s instructions.	Total RNA was isolated using the RNeasy mini kit from Qiagen, following the manufacturer’s instructions.	Total RNA was isolated using the RNeasy mini kit from Qiagen, following the manufacturer’s instructions.	Total RNA was isolated using the RNeasy mini kit from Qiagen, following the manufacturer’s instructions.	Total RNA was isolated using the RNeasy mini kit from Qiagen, following the manufacturer’s instructions.	Total RNA was isolated using the RNeasy mini kit from Qiagen, following the manufacturer’s instructions.	Total RNA was isolated using the RNeasy mini kit from Qiagen, following the manufacturer’s instructions.	Total RNA was isolated using the RNeasy mini kit from Qiagen, following the manufacturer’s instructions.	Total RNA was isolated using the RNeasy mini kit from Qiagen, following the manufacturer’s instructions.	Total RNA was isolated using the RNeasy mini kit from Qiagen, following the manufacturer’s instructions.	Total RNA was isolated using the RNeasy mini kit from Qiagen, following the manufacturer’s instructions.	Total RNA was isolated using the RNeasy mini kit from Qiagen, following the manufacturer’s instructions.	Total RNA was isolated using the RNeasy mini kit from Qiagen, following the manufacturer’s instructions.	Total RNA was isolated using the RNeasy mini kit from Qiagen, following the manufacturer’s instructions.	Total RNA was isolated using the RNeasy mini kit from Qiagen, following the manufacturer’s instructions.	Total RNA was isolated using the RNeasy mini kit from Qiagen, following the manufacturer’s instructions.	Total RNA was isolated using the RNeasy mini kit from Qiagen, following the manufacturer’s instructions.	Total RNA was isolated using the RNeasy mini kit from Qiagen, following the manufacturer’s instructions.	Total RNA was isolated using the RNeasy mini kit from Qiagen, following the manufacturer’s instructions.	Total RNA was isolated using the RNeasy mini kit from Qiagen, following the manufacturer’s instructions.	Total RNA was isolated using the RNeasy mini kit from Qiagen, following the manufacturer’s instructions.	Total RNA was isolated using the RNeasy mini kit from Qiagen, following the manufacturer’s instructions.	Total RNA was isolated using the RNeasy mini kit from Qiagen, following the manufacturer’s instructions.	Total RNA was isolated using the RNeasy mini kit from Qiagen, following the manufacturer’s instructions.	Total RNA was isolated using the RNeasy mini kit from Qiagen, following the manufacturer’s instructions.	Total RNA was isolated using the RNeasy mini kit from Qiagen, following the manufacturer’s instructions.	Total RNA was isolated using the RNeasy mini kit from Qiagen, following the manufacturer’s instructions.	Total RNA was isolated using the RNeasy mini kit from Qiagen, following the manufacturer’s instructions.	Total RNA was isolated using the RNeasy mini kit from Qiagen, following the manufacturer’s instructions.	Total RNA was isolated using the RNeasy mini kit from Qiagen, following the manufacturer’s instructions.	Total RNA was isolated using the RNeasy mini kit from Qiagen, following the manufacturer’s instructions.	Total RNA was isolated using the RNeasy mini kit from Qiagen, following the manufacturer’s instructions.	Total RNA was isolated using the RNeasy mini kit from Qiagen, following the manufacturer’s instructions.	Total RNA was isolated using the RNeasy mini kit from Qiagen, following the manufacturer’s instructions.	Total RNA was isolated using the RNeasy mini kit from Qiagen, following the manufacturer’s instructions.	Total RNA was isolated using the RNeasy mini kit from Qiagen, following the manufacturer’s instructions.	Total RNA was isolated using the RNeasy mini kit from Qiagen, following the manufacturer’s instructions.	Total RNA was isolated using the RNeasy mini kit from Qiagen, following the manufacturer’s instructions.	Total RNA was isolated using the RNeasy mini kit from Qiagen, following the manufacturer’s instructions.	Total RNA was isolated using the RNeasy mini kit from Qiagen, following the manufacturer’s instructions.	Total RNA was isolated using the RNeasy mini kit from Qiagen, following the manufacturer’s instructions.	Total RNA was isolated using the RNeasy mini kit from Qiagen, following the manufacturer’s instructions.	Total RNA was isolated using the RNeasy mini kit from Qiagen, following the manufacturer’s instructions.	Total RNA was isolated using the RNeasy mini kit from Qiagen, following the manufacturer’s instructions.	Total RNA was isolated using the RNeasy mini kit from Qiagen, following the manufacturer’s instructions.
!Sample_label_ch1	biotin	biotin	biotin	biotin	biotin	biotin	biotin	biotin	biotin	biotin	biotin	biotin	biotin	biotin	biotin	biotin	biotin	biotin	biotin	biotin	biotin	biotin	biotin	biotin	biotin	biotin	biotin	biotin	biotin	biotin	biotin	biotin	biotin	biotin	biotin	biotin	biotin	biotin	biotin	biotin	biotin	biotin	biotin	biotin	biotin	biotin	biotin	biotin	biotin
!Sample_label_protocol_ch1	Biotinylated cRNA were prepared according to the standard Affymetrix protocol from total RNA (Expression Analysis Technical Manual, Affymetrix).	Biotinylated cRNA were prepared according to the standard Affymetrix protocol from total RNA (Expression Analysis Technical Manual, Affymetrix).	Biotinylated cRNA were prepared according to the standard Affymetrix protocol from total RNA (Expression Analysis Technical Manual, Affymetrix).	Biotinylated cRNA were prepared according to the standard Affymetrix protocol from total RNA (Expression Analysis Technical Manual, Affymetrix).	Biotinylated cRNA were prepared according to the standard Affymetrix protocol from total RNA (Expression Analysis Technical Manual, Affymetrix).	Biotinylated cRNA were prepared according to the standard Affymetrix protocol from total RNA (Expression Analysis Technical Manual, Affymetrix).	Biotinylated cRNA were prepared according to the standard Affymetrix protocol from total RNA (Expression Analysis Technical Manual, Affymetrix).	Biotinylated cRNA were prepared according to the standard Affymetrix protocol from total RNA (Expression Analysis Technical Manual, Affymetrix).	Biotinylated cRNA were prepared according to the standard Affymetrix protocol from total RNA (Expression Analysis Technical Manual, Affymetrix).	Biotinylated cRNA were prepared according to the standard Affymetrix protocol from total RNA (Expression Analysis Technical Manual, Affymetrix).	Biotinylated cRNA were prepared according to the standard Affymetrix protocol from total RNA (Expression Analysis Technical Manual, Affymetrix).	Biotinylated cRNA were prepared according to the standard Affymetrix protocol from total RNA (Expression Analysis Technical Manual, Affymetrix).	Biotinylated cRNA were prepared according to the standard Affymetrix protocol from total RNA (Expression Analysis Technical Manual, Affymetrix).	Biotinylated cRNA were prepared according to the standard Affymetrix protocol from total RNA (Expression Analysis Technical Manual, Affymetrix).	Biotinylated cRNA were prepared according to the standard Affymetrix protocol from total RNA (Expression Analysis Technical Manual, Affymetrix).	Biotinylated cRNA were prepared according to the standard Affymetrix protocol from total RNA (Expression Analysis Technical Manual, Affymetrix).	Biotinylated cRNA were prepared according to the standard Affymetrix protocol from total RNA (Expression Analysis Technical Manual, Affymetrix).	Biotinylated cRNA were prepared according to the standard Affymetrix protocol from total RNA (Expression Analysis Technical Manual, Affymetrix).	Biotinylated cRNA were prepared according to the standard Affymetrix protocol from total RNA (Expression Analysis Technical Manual, Affymetrix).	Biotinylated cRNA were prepared according to the standard Affymetrix protocol from total RNA (Expression Analysis Technical Manual, Affymetrix).	Biotinylated cRNA were prepared according to the standard Affymetrix protocol from total RNA (Expression Analysis Technical Manual, Affymetrix).	Biotinylated cRNA were prepared according to the standard Affymetrix protocol from total RNA (Expression Analysis Technical Manual, Affymetrix).	Biotinylated cRNA were prepared according to the standard Affymetrix protocol from total RNA (Expression Analysis Technical Manual, Affymetrix).	Biotinylated cRNA were prepared according to the standard Affymetrix protocol from total RNA (Expression Analysis Technical Manual, Affymetrix).	Biotinylated cRNA were prepared according to the standard Affymetrix protocol from total RNA (Expression Analysis Technical Manual, Affymetrix).	Biotinylated cRNA were prepared according to the standard Affymetrix protocol from total RNA (Expression Analysis Technical Manual, Affymetrix).	Biotinylated cRNA were prepared according to the standard Affymetrix protocol from total RNA (Expression Analysis Technical Manual, Affymetrix).	Biotinylated cRNA were prepared according to the standard Affymetrix protocol from total RNA (Expression Analysis Technical Manual, Affymetrix).	Biotinylated cRNA were prepared according to the standard Affymetrix protocol from total RNA (Expression Analysis Technical Manual, Affymetrix).	Biotinylated cRNA were prepared according to the standard Affymetrix protocol from total RNA (Expression Analysis Technical Manual, Affymetrix).	Biotinylated cRNA were prepared according to the standard Affymetrix protocol from total RNA (Expression Analysis Technical Manual, Affymetrix).	Biotinylated cRNA were prepared according to the standard Affymetrix protocol from total RNA (Expression Analysis Technical Manual, Affymetrix).	Biotinylated cRNA were prepared according to the standard Affymetrix protocol from total RNA (Expression Analysis Technical Manual, Affymetrix).	Biotinylated cRNA were prepared according to the standard Affymetrix protocol from total RNA (Expression Analysis Technical Manual, Affymetrix).	Biotinylated cRNA were prepared according to the standard Affymetrix protocol from total RNA (Expression Analysis Technical Manual, Affymetrix).	Biotinylated cRNA were prepared according to the standard Affymetrix protocol from total RNA (Expression Analysis Technical Manual, Affymetrix).	Biotinylated cRNA were prepared according to the standard Affymetrix protocol from total RNA (Expression Analysis Technical Manual, Affymetrix).	Biotinylated cRNA were prepared according to the standard Affymetrix protocol from total RNA (Expression Analysis Technical Manual, Affymetrix).	Biotinylated cRNA were prepared according to the standard Affymetrix protocol from total RNA (Expression Analysis Technical Manual, Affymetrix).	Biotinylated cRNA were prepared according to the standard Affymetrix protocol from total RNA (Expression Analysis Technical Manual, Affymetrix).	Biotinylated cRNA were prepared according to the standard Affymetrix protocol from total RNA (Expression Analysis Technical Manual, Affymetrix).	Biotinylated cRNA were prepared according to the standard Affymetrix protocol from total RNA (Expression Analysis Technical Manual, Affymetrix).	Biotinylated cRNA were prepared according to the standard Affymetrix protocol from total RNA (Expression Analysis Technical Manual, Affymetrix).	Biotinylated cRNA were prepared according to the standard Affymetrix protocol from total RNA (Expression Analysis Technical Manual, Affymetrix).	Biotinylated cRNA were prepared according to the standard Affymetrix protocol from total RNA (Expression Analysis Technical Manual, Affymetrix).	Biotinylated cRNA were prepared according to the standard Affymetrix protocol from total RNA (Expression Analysis Technical Manual, Affymetrix).	Biotinylated cRNA were prepared according to the standard Affymetrix protocol from total RNA (Expression Analysis Technical Manual, Affymetrix).	Biotinylated cRNA were prepared according to the standard Affymetrix protocol from total RNA (Expression Analysis Technical Manual, Affymetrix).	Biotinylated cRNA were prepared according to the standard Affymetrix protocol from total RNA (Expression Analysis Technical Manual, Affymetrix).
!Sample_taxid_ch1	9606	9606	9606	9606	9606	9606	9606	9606	9606	9606	9606	9606	9606	9606	9606	9606	9606	9606	9606	9606	9606	9606	9606	9606	9606	9606	9606	9606	9606	9606	9606	9606	9606	9606	9606	9606	9606	9606	9606	9606	9606	9606	9606	9606	9606	9606	9606	9606	9606
!Sample_hyb_protocol	standard Affymetrix protocol	standard Affymetrix protocol	standard Affymetrix protocol	standard Affymetrix protocol	standard Affymetrix protocol	standard Affymetrix protocol	standard Affymetrix protocol	standard Affymetrix protocol	standard Affymetrix protocol	standard Affymetrix protocol	standard Affymetrix protocol	standard Affymetrix protocol	standard Affymetrix protocol	standard Affymetrix protocol	standard Affymetrix protocol	standard Affymetrix protocol	standard Affymetrix protocol	standard Affymetrix protocol	standard Affymetrix protocol	standard Affymetrix protocol	standard Affymetrix protocol	standard Affymetrix protocol	standard Affymetrix protocol	standard Affymetrix protocol	standard Affymetrix protocol	standard Affymetrix protocol	standard Affymetrix protocol	standard Affymetrix protocol	standard Affymetrix protocol	standard Affymetrix protocol	standard Affymetrix protocol	standard Affymetrix protocol	standard Affymetrix protocol	standard Affymetrix protocol	standard Affymetrix protocol	standard Affymetrix protocol	standard Affymetrix protocol	standard Affymetrix protocol	standard Affymetrix protocol	standard Affymetrix protocol	standard Affymetrix protocol	standard Affymetrix protocol	standard Affymetrix protocol	standard Affymetrix protocol	standard Affymetrix protocol	standard Affymetrix protocol	standard Affymetrix protocol	standard Affymetrix protocol	standard Affymetrix protocol
!Sample_scan_protocol	GeneChip arrays were scanned by GeneChip Scanner 3000 7G according to the Affymetrix Expression Analysis Technical Manual.	GeneChip arrays were scanned by GeneChip Scanner 3000 7G according to the Affymetrix Expression Analysis Technical Manual.	GeneChip arrays were scanned by GeneChip Scanner 3000 7G according to the Affymetrix Expression Analysis Technical Manual.	GeneChip arrays were scanned by GeneChip Scanner 3000 7G according to the Affymetrix Expression Analysis Technical Manual.	GeneChip arrays were scanned by GeneChip Scanner 3000 7G according to the Affymetrix Expression Analysis Technical Manual.	GeneChip arrays were scanned by GeneChip Scanner 3000 7G according to the Affymetrix Expression Analysis Technical Manual.	GeneChip arrays were scanned by GeneChip Scanner 3000 7G according to the Affymetrix Expression Analysis Technical Manual.	GeneChip arrays were scanned by GeneChip Scanner 3000 7G according to the Affymetrix Expression Analysis Technical Manual.	GeneChip arrays were scanned by GeneChip Scanner 3000 7G according to the Affymetrix Expression Analysis Technical Manual.	GeneChip arrays were scanned by GeneChip Scanner 3000 7G according to the Affymetrix Expression Analysis Technical Manual.	GeneChip arrays were scanned by GeneChip Scanner 3000 7G according to the Affymetrix Expression Analysis Technical Manual.	GeneChip arrays were scanned by GeneChip Scanner 3000 7G according to the Affymetrix Expression Analysis Technical Manual.	GeneChip arrays were scanned by GeneChip Scanner 3000 7G according to the Affymetrix Expression Analysis Technical Manual.	GeneChip arrays were scanned by GeneChip Scanner 3000 7G according to the Affymetrix Expression Analysis Technical Manual.	GeneChip arrays were scanned by GeneChip Scanner 3000 7G according to the Affymetrix Expression Analysis Technical Manual.	GeneChip arrays were scanned by GeneChip Scanner 3000 7G according to the Affymetrix Expression Analysis Technical Manual.	GeneChip arrays were scanned by GeneChip Scanner 3000 7G according to the Affymetrix Expression Analysis Technical Manual.	GeneChip arrays were scanned by GeneChip Scanner 3000 7G according to the Affymetrix Expression Analysis Technical Manual.	GeneChip arrays were scanned by GeneChip Scanner 3000 7G according to the Affymetrix Expression Analysis Technical Manual.	GeneChip arrays were scanned by GeneChip Scanner 3000 7G according to the Affymetrix Expression Analysis Technical Manual.	GeneChip arrays were scanned by GeneChip Scanner 3000 7G according to the Affymetrix Expression Analysis Technical Manual.	GeneChip arrays were scanned by GeneChip Scanner 3000 7G according to the Affymetrix Expression Analysis Technical Manual.	GeneChip arrays were scanned by GeneChip Scanner 3000 7G according to the Affymetrix Expression Analysis Technical Manual.	GeneChip arrays were scanned by GeneChip Scanner 3000 7G according to the Affymetrix Expression Analysis Technical Manual.	GeneChip arrays were scanned by GeneChip Scanner 3000 7G according to the Affymetrix Expression Analysis Technical Manual.	GeneChip arrays were scanned by GeneChip Scanner 3000 7G according to the Affymetrix Expression Analysis Technical Manual.	GeneChip arrays were scanned by GeneChip Scanner 3000 7G according to the Affymetrix Expression Analysis Technical Manual.	GeneChip arrays were scanned by GeneChip Scanner 3000 7G according to the Affymetrix Expression Analysis Technical Manual.	GeneChip arrays were scanned by GeneChip Scanner 3000 7G according to the Affymetrix Expression Analysis Technical Manual.	GeneChip arrays were scanned by GeneChip Scanner 3000 7G according to the Affymetrix Expression Analysis Technical Manual.	GeneChip arrays were scanned by GeneChip Scanner 3000 7G according to the Affymetrix Expression Analysis Technical Manual.	GeneChip arrays were scanned by GeneChip Scanner 3000 7G according to the Affymetrix Expression Analysis Technical Manual.	GeneChip arrays were scanned by GeneChip Scanner 3000 7G according to the Affymetrix Expression Analysis Technical Manual.	GeneChip arrays were scanned by GeneChip Scanner 3000 7G according to the Affymetrix Expression Analysis Technical Manual.	GeneChip arrays were scanned by GeneChip Scanner 3000 7G according to the Affymetrix Expression Analysis Technical Manual.	GeneChip arrays were scanned by GeneChip Scanner 3000 7G according to the Affymetrix Expression Analysis Technical Manual.	GeneChip arrays were scanned by GeneChip Scanner 3000 7G according to the Affymetrix Expression Analysis Technical Manual.	GeneChip arrays were scanned by GeneChip Scanner 3000 7G according to the Affymetrix Expression Analysis Technical Manual.	GeneChip arrays were scanned by GeneChip Scanner 3000 7G according to the Affymetrix Expression Analysis Technical Manual.	GeneChip arrays were scanned by GeneChip Scanner 3000 7G according to the Affymetrix Expression Analysis Technical Manual.	GeneChip arrays were scanned by GeneChip Scanner 3000 7G according to the Affymetrix Expression Analysis Technical Manual.	GeneChip arrays were scanned by GeneChip Scanner 3000 7G according to the Affymetrix Expression Analysis Technical Manual.	GeneChip arrays were scanned by GeneChip Scanner 3000 7G according to the Affymetrix Expression Analysis Technical Manual.	GeneChip arrays were scanned by GeneChip Scanner 3000 7G according to the Affymetrix Expression Analysis Technical Manual.	GeneChip arrays were scanned by GeneChip Scanner 3000 7G according to the Affymetrix Expression Analysis Technical Manual.	GeneChip arrays were scanned by GeneChip Scanner 3000 7G according to the Affymetrix Expression Analysis Technical Manual.	GeneChip arrays were scanned by GeneChip Scanner 3000 7G according to the Affymetrix Expression Analysis Technical Manual.	GeneChip arrays were scanned by GeneChip Scanner 3000 7G according to the Affymetrix Expression Analysis Technical Manual.	GeneChip arrays were scanned by GeneChip Scanner 3000 7G according to the Affymetrix Expression Analysis Technical Manual.
!Sample_description	Gene expression data from the tubulointerstitial compartment of human LN kidney	Gene expression data from the tubulointerstitial compartment of human LN kidney	Gene expression data from the tubulointerstitial compartment of human LN kidney	Gene expression data from the tubulointerstitial compartment of human LN kidney	Gene expression data from the tubulointerstitial compartment of human LN kidney	Gene expression data from the tubulointerstitial compartment of human LN kidney	Gene expression data from the tubulointerstitial compartment of human LN kidney	Gene expression data from the tubulointerstitial compartment of human LN kidney	Gene expression data from the tubulointerstitial compartment of human LN kidney	Gene expression data from the tubulointerstitial compartment of human LN kidney	Gene expression data from the tubulointerstitial compartment of human LN kidney	Gene expression data from the tubulointerstitial compartment of human LN kidney	Gene expression data from the tubulointerstitial compartment of human LN kidney	Gene expression data from the tubulointerstitial compartment of human LN kidney	Gene expression data from the tubulointerstitial compartment of human LN kidney	Gene expression data from the tubulointerstitial compartment of human LN kidney	Gene expression data from the tubulointerstitial compartment of human LN kidney	Gene expression data from the tubulointerstitial compartment of human LN kidney	Gene expression data from the tubulointerstitial compartment of human LN kidney	Gene expression data from the tubulointerstitial compartment of human LN kidney	Gene expression data from the tubulointerstitial compartment of human LN kidney	Gene expression data from the tubulointerstitial compartment of human LN kidney	Gene expression data from the tubulointerstitial compartment of human LN kidney	Gene expression data from the tubulointerstitial compartment of human LN kidney	Gene expression data from the tubulointerstitial compartment of human LN kidney	Gene expression data from the tubulointerstitial compartment of human LN kidney	Gene expression data from the tubulointerstitial compartment of human LN kidney	Gene expression data from the tubulointerstitial compartment of human LN kidney	Gene expression data from the tubulointerstitial compartment of human LN kidney	Gene expression data from the tubulointerstitial compartment of human LN kidney	Gene expression data from the tubulointerstitial compartment of human LN kidney	Gene expression data from the tubulointerstitial compartment of human LN kidney	Gene expression data from the tubulointerstitial compartment of human pre-transplant living donor control kidney	Gene expression data from the tubulointerstitial compartment of human pre-transplant living donor control kidney	Gene expression data from the tubulointerstitial compartment of human pre-transplant living donor control kidney	Gene expression data from the tubulointerstitial compartment of human pre-transplant living donor control kidney	Gene expression data from the tubulointerstitial compartment of human pre-transplant living donor control kidney	Gene expression data from the tubulointerstitial compartment of human pre-transplant living donor control kidney	Gene expression data from the tubulointerstitial compartment of human pre-transplant living donor control kidney	Gene expression data from the tubulointerstitial compartment of human pre-transplant living donor control kidney	Gene expression data from the tubulointerstitial compartment of human pre-transplant living donor control kidney	Gene expression data from the tubulointerstitial compartment of human pre-transplant living donor control kidney	Gene expression data from the tubulointerstitial compartment of human pre-transplant living donor control kidney	Gene expression data from the tubulointerstitial compartment of human pre-transplant living donor control kidney	Gene expression data from the tubulointerstitial compartment of human pre-transplant living donor control kidney	Gene expression data from the tubulointerstitial compartment of human pre-transplant living donor control kidney	Gene expression data from the tubulointerstitial compartment of human pre-transplant living donor control kidney	Gene expression data from the glomerular compartment of human LN kidney	Gene expression data from the glomerular compartment of human LN kidney
!Sample_data_processing	The data were analyzed using GenePattern pipeline: RMA method and Human Entrez Gene custom CDF annotation version 10 were used for the normalization.	The data were analyzed using GenePattern pipeline: RMA method and Human Entrez Gene custom CDF annotation version 10 were used for the normalization.	The data were analyzed using GenePattern pipeline: RMA method and Human Entrez Gene custom CDF annotation version 10 were used for the normalization.	The data were analyzed using GenePattern pipeline: RMA method and Human Entrez Gene custom CDF annotation version 10 were used for the normalization.	The data were analyzed using GenePattern pipeline: RMA method and Human Entrez Gene custom CDF annotation version 10 were used for the normalization.	The data were analyzed using GenePattern pipeline: RMA method and Human Entrez Gene custom CDF annotation version 10 were used for the normalization.	The data were analyzed using GenePattern pipeline: RMA method and Human Entrez Gene custom CDF annotation version 10 were used for the normalization.	The data were analyzed using GenePattern pipeline: RMA method and Human Entrez Gene custom CDF annotation version 10 were used for the normalization.	The data were analyzed using GenePattern pipeline: RMA method and Human Entrez Gene custom CDF annotation version 10 were used for the normalization.	The data were analyzed using GenePattern pipeline: RMA method and Human Entrez Gene custom CDF annotation version 10 were used for the normalization.	The data were analyzed using GenePattern pipeline: RMA method and Human Entrez Gene custom CDF annotation version 10 were used for the normalization.	The data were analyzed using GenePattern pipeline: RMA method and Human Entrez Gene custom CDF annotation version 10 were used for the normalization.	The data were analyzed using GenePattern pipeline: RMA method and Human Entrez Gene custom CDF annotation version 10 were used for the normalization.	The data were analyzed using GenePattern pipeline: RMA method and Human Entrez Gene custom CDF annotation version 10 were used for the normalization.	The data were analyzed using GenePattern pipeline: RMA method and Human Entrez Gene custom CDF annotation version 10 were used for the normalization.	The data were analyzed using GenePattern pipeline: RMA method and Human Entrez Gene custom CDF annotation version 10 were used for the normalization.	The data were analyzed using GenePattern pipeline: RMA method and Human Entrez Gene custom CDF annotation version 10 were used for the normalization.	The data were analyzed using GenePattern pipeline: RMA method and Human Entrez Gene custom CDF annotation version 10 were used for the normalization.	The data were analyzed using GenePattern pipeline: RMA method and Human Entrez Gene custom CDF annotation version 10 were used for the normalization.	The data were analyzed using GenePattern pipeline: RMA method and Human Entrez Gene custom CDF annotation version 10 were used for the normalization.	The data were analyzed using GenePattern pipeline: RMA method and Human Entrez Gene custom CDF annotation version 10 were used for the normalization.	The data were analyzed using GenePattern pipeline: RMA method and Human Entrez Gene custom CDF annotation version 10 were used for the normalization.	The data were analyzed using GenePattern pipeline: RMA method and Human Entrez Gene custom CDF annotation version 10 were used for the normalization.	The data were analyzed using GenePattern pipeline: RMA method and Human Entrez Gene custom CDF annotation version 10 were used for the normalization.	The data were analyzed using GenePattern pipeline: RMA method and Human Entrez Gene custom CDF annotation version 10 were used for the normalization.	The data were analyzed using GenePattern pipeline: RMA method and Human Entrez Gene custom CDF annotation version 10 were used for the normalization.	The data were analyzed using GenePattern pipeline: RMA method and Human Entrez Gene custom CDF annotation version 10 were used for the normalization.	The data were analyzed using GenePattern pipeline: RMA method and Human Entrez Gene custom CDF annotation version 10 were used for the normalization.	The data were analyzed using GenePattern pipeline: RMA method and Human Entrez Gene custom CDF annotation version 10 were used for the normalization.	The data were analyzed using GenePattern pipeline: RMA method and Human Entrez Gene custom CDF annotation version 10 were used for the normalization.	The data were analyzed using GenePattern pipeline: RMA method and Human Entrez Gene custom CDF annotation version 10 were used for the normalization.	The data were analyzed using GenePattern pipeline: RMA method and Human Entrez Gene custom CDF annotation version 10 were used for the normalization.	The data were analyzed using GenePattern pipeline: RMA method and Human Entrez Gene custom CDF annotation version 10 were used for the normalization.	The data were analyzed using GenePattern pipeline: RMA method and Human Entrez Gene custom CDF annotation version 10 were used for the normalization.	The data were analyzed using GenePattern pipeline: RMA method and Human Entrez Gene custom CDF annotation version 10 were used for the normalization.	The data were analyzed using GenePattern pipeline: RMA method and Human Entrez Gene custom CDF annotation version 10 were used for the normalization.	The data were analyzed using GenePattern pipeline: RMA method and Human Entrez Gene custom CDF annotation version 10 were used for the normalization.	The data were analyzed using GenePattern pipeline: RMA method and Human Entrez Gene custom CDF annotation version 10 were used for the normalization.	The data were analyzed using GenePattern pipeline: RMA method and Human Entrez Gene custom CDF annotation version 10 were used for the normalization.	The data were analyzed using GenePattern pipeline: RMA method and Human Entrez Gene custom CDF annotation version 10 were used for the normalization.	The data were analyzed using GenePattern pipeline: RMA method and Human Entrez Gene custom CDF annotation version 10 were used for the normalization.	The data were analyzed using GenePattern pipeline: RMA method and Human Entrez Gene custom CDF annotation version 10 were used for the normalization.	The data were analyzed using GenePattern pipeline: RMA method and Human Entrez Gene custom CDF annotation version 10 were used for the normalization.	The data were analyzed using GenePattern pipeline: RMA method and Human Entrez Gene custom CDF annotation version 10 were used for the normalization.	The data were analyzed using GenePattern pipeline: RMA method and Human Entrez Gene custom CDF annotation version 10 were used for the normalization.	The data were analyzed using GenePattern pipeline: RMA method and Human Entrez Gene custom CDF annotation version 10 were used for the normalization.	The data were analyzed using GenePattern pipeline: RMA method and Human Entrez Gene custom CDF annotation version 10 were used for the normalization.	The data were analyzed using GenePattern pipeline: RMA method and Human Entrez Gene custom CDF annotation version 10 were used for the normalization.	The data were analyzed using GenePattern pipeline: RMA method and Human Entrez Gene custom CDF annotation version 10 were used for the normalization.
!Sample_platform_id	GPL14663	GPL14663	GPL14663	GPL14663	GPL14663	GPL14663	GPL14663	GPL14663	GPL14663	GPL14663	GPL14663	GPL14663	GPL14663	GPL14663	GPL14663	GPL14663	GPL14663	GPL14663	GPL14663	GPL14663	GPL14663	GPL14663	GPL14663	GPL14663	GPL14663	GPL14663	GPL14663	GPL14663	GPL14663	GPL14663	GPL14663	GPL14663	GPL14663	GPL14663	GPL14663	GPL14663	GPL14663	GPL14663	GPL14663	GPL14663	GPL14663	GPL14663	GPL14663	GPL14663	GPL14663	GPL14663	GPL14663	GPL14663	GPL14663
!Sample_contact_name	Celine,C,Berthier	Celine,C,Berthier	Celine,C,Berthier	Celine,C,Berthier	Celine,C,Berthier	Celine,C,Berthier	Celine,C,Berthier	Celine,C,Berthier	Celine,C,Berthier	Celine,C,Berthier	Celine,C,Berthier	Celine,C,Berthier	Celine,C,Berthier	Celine,C,Berthier	Celine,C,Berthier	Celine,C,Berthier	Celine,C,Berthier	Celine,C,Berthier	Celine,C,Berthier	Celine,C,Berthier	Celine,C,Berthier	Celine,C,Berthier	Celine,C,Berthier	Celine,C,Berthier	Celine,C,Berthier	Celine,C,Berthier	Celine,C,Berthier	Celine,C,Berthier	Celine,C,Berthier	Celine,C,Berthier	Celine,C,Berthier	Celine,C,Berthier	Celine,C,Berthier	Celine,C,Berthier	Celine,C,Berthier	Celine,C,Berthier	Celine,C,Berthier	Celine,C,Berthier	Celine,C,Berthier	Celine,C,Berthier	Celine,C,Berthier	Celine,C,Berthier	Celine,C,Berthier	Celine,C,Berthier	Celine,C,Berthier	Celine,C,Berthier	Celine,C,Berthier	Celine,C,Berthier	Celine,C,Berthier
!Sample_contact_institute	University of Michigan	University of Michigan	University of Michigan	University of Michigan	University of Michigan	University of Michigan	University of Michigan	University of Michigan	University of Michigan	University of Michigan	University of Michigan	University of Michigan	University of Michigan	University of Michigan	University of Michigan	University of Michigan	University of Michigan	University of Michigan	University of Michigan	University of Michigan	University of Michigan	University of Michigan	University of Michigan	University of Michigan	University of Michigan	University of Michigan	University of Michigan	University of Michigan	University of Michigan	University of Michigan	University of Michigan	University of Michigan	University of Michigan	University of Michigan	University of Michigan	University of Michigan	University of Michigan	University of Michigan	University of Michigan	University of Michigan	University of Michigan	University of Michigan	University of Michigan	University of Michigan	University of Michigan	University of Michigan	University of Michigan	University of Michigan	University of Michigan
!Sample_contact_address	1150 W. Medical Center Dr, MSRB2	1150 W. Medical Center Dr, MSRB2	1150 W. Medical Center Dr, MSRB2	1150 W. Medical Center Dr, MSRB2	1150 W. Medical Center Dr, MSRB2	1150 W. Medical Center Dr, MSRB2	1150 W. Medical Center Dr, MSRB2	1150 W. Medical Center Dr, MSRB2	1150 W. Medical Center Dr, MSRB2	1150 W. Medical Center Dr, MSRB2	1150 W. Medical Center Dr, MSRB2	1150 W. Medical Center Dr, MSRB2	1150 W. Medical Center Dr, MSRB2	1150 W. Medical Center Dr, MSRB2	1150 W. Medical Center Dr, MSRB2	1150 W. Medical Center Dr, MSRB2	1150 W. Medical Center Dr, MSRB2	1150 W. Medical Center Dr, MSRB2	1150 W. Medical Center Dr, MSRB2	1150 W. Medical Center Dr, MSRB2	1150 W. Medical Center Dr, MSRB2	1150 W. Medical Center Dr, MSRB2	1150 W. Medical Center Dr, MSRB2	1150 W. Medical Center Dr, MSRB2	1150 W. Medical Center Dr, MSRB2	1150 W. Medical Center Dr, MSRB2	1150 W. Medical Center Dr, MSRB2	1150 W. Medical Center Dr, MSRB2	1150 W. Medical Center Dr, MSRB2	1150 W. Medical Center Dr, MSRB2	1150 W. Medical Center Dr, MSRB2	1150 W. Medical Center Dr, MSRB2	1150 W. Medical Center Dr, MSRB2	1150 W. Medical Center Dr, MSRB2	1150 W. Medical Center Dr, MSRB2	1150 W. Medical Center Dr, MSRB2	1150 W. Medical Center Dr, MSRB2	1150 W. Medical Center Dr, MSRB2	1150 W. Medical Center Dr, MSRB2	1150 W. Medical Center Dr, MSRB2	1150 W. Medical Center Dr, MSRB2	1150 W. Medical Center Dr, MSRB2	1150 W. Medical Center Dr, MSRB2	1150 W. Medical Center Dr, MSRB2	1150 W. Medical Center Dr, MSRB2	1150 W. Medical Center Dr, MSRB2	1150 W. Medical Center Dr, MSRB2	1150 W. Medical Center Dr, MSRB2	1150 W. Medical Center Dr, MSRB2
!Sample_contact_city	Ann Arbor	Ann Arbor	Ann Arbor	Ann Arbor	Ann Arbor	Ann Arbor	Ann Arbor	Ann Arbor	Ann Arbor	Ann Arbor	Ann Arbor	Ann Arbor	Ann Arbor	Ann Arbor	Ann Arbor	Ann Arbor	Ann Arbor	Ann Arbor	Ann Arbor	Ann Arbor	Ann Arbor	Ann Arbor	Ann Arbor	Ann Arbor	Ann Arbor	Ann Arbor	Ann Arbor	Ann Arbor	Ann Arbor	Ann Arbor	Ann Arbor	Ann Arbor	Ann Arbor	Ann Arbor	Ann Arbor	Ann Arbor	Ann Arbor	Ann Arbor	Ann Arbor	Ann Arbor	Ann Arbor	Ann Arbor	Ann Arbor	Ann Arbor	Ann Arbor	Ann Arbor	Ann Arbor	Ann Arbor	Ann Arbor
!Sample_contact_state	MI	MI	MI	MI	MI	MI	MI	MI	MI	MI	MI	MI	MI	MI	MI	MI	MI	MI	MI	MI	MI	MI	MI	MI	MI	MI	MI	MI	MI	MI	MI	MI	MI	MI	MI	MI	MI	MI	MI	MI	MI	MI	MI	MI	MI	MI	MI	MI	MI
!Sample_contact_zip/postal_code	48109	48109	48109	48109	48109	48109	48109	48109	48109	48109	48109	48109	48109	48109	48109	48109	48109	48109	48109	48109	48109	48109	48109	48109	48109	48109	48109	48109	48109	48109	48109	48109	48109	48109	48109	48109	48109	48109	48109	48109	48109	48109	48109	48109	48109	48109	48109	48109	48109
!Sample_contact_country	USA	USA	USA	USA	USA	USA	USA	USA	USA	USA	USA	USA	USA	USA	USA	USA	USA	USA	USA	USA	USA	USA	USA	USA	USA	USA	USA	USA	USA	USA	USA	USA	USA	USA	USA	USA	USA	USA	USA	USA	USA	USA	USA	USA	USA	USA	USA	USA	USA
!Sample_supplementary_file	ftp://ftp.ncbi.nlm.nih.gov/geo/samples/GSM807nnn/GSM807842/suppl/GSM807842.CEL.gz	ftp://ftp.ncbi.nlm.nih.gov/geo/samples/GSM807nnn/GSM807843/suppl/GSM807843.CEL.gz	ftp://ftp.ncbi.nlm.nih.gov/geo/samples/GSM807nnn/GSM807844/suppl/GSM807844.CEL.gz	ftp://ftp.ncbi.nlm.nih.gov/geo/samples/GSM807nnn/GSM807845/suppl/GSM807845.CEL.gz	ftp://ftp.ncbi.nlm.nih.gov/geo/samples/GSM807nnn/GSM807846/suppl/GSM807846.CEL.gz	ftp://ftp.ncbi.nlm.nih.gov/geo/samples/GSM807nnn/GSM807847/suppl/GSM807847.CEL.gz	ftp://ftp.ncbi.nlm.nih.gov/geo/samples/GSM807nnn/GSM807848/suppl/GSM807848.CEL.gz	ftp://ftp.ncbi.nlm.nih.gov/geo/samples/GSM807nnn/GSM807849/suppl/GSM807849.CEL.gz	ftp://ftp.ncbi.nlm.nih.gov/geo/samples/GSM807nnn/GSM807850/suppl/GSM807850.CEL.gz	ftp://ftp.ncbi.nlm.nih.gov/geo/samples/GSM807nnn/GSM807851/suppl/GSM807851.CEL.gz	ftp://ftp.ncbi.nlm.nih.gov/geo/samples/GSM807nnn/GSM807852/suppl/GSM807852.CEL.gz	ftp://ftp.ncbi.nlm.nih.gov/geo/samples/GSM807nnn/GSM807853/suppl/GSM807853.CEL.gz	ftp://ftp.ncbi.nlm.nih.gov/geo/samples/GSM807nnn/GSM807854/suppl/GSM807854.CEL.gz	ftp://ftp.ncbi.nlm.nih.gov/geo/samples/GSM807nnn/GSM807855/suppl/GSM807855.CEL.gz	ftp://ftp.ncbi.nlm.nih.gov/geo/samples/GSM807nnn/GSM807856/suppl/GSM807856.CEL.gz	ftp://ftp.ncbi.nlm.nih.gov/geo/samples/GSM807nnn/GSM807857/suppl/GSM807857.CEL.gz	ftp://ftp.ncbi.nlm.nih.gov/geo/samples/GSM807nnn/GSM807858/suppl/GSM807858.CEL.gz	ftp://ftp.ncbi.nlm.nih.gov/geo/samples/GSM807nnn/GSM807859/suppl/GSM807859.CEL.gz	ftp://ftp.ncbi.nlm.nih.gov/geo/samples/GSM807nnn/GSM807860/suppl/GSM807860.CEL.gz	ftp://ftp.ncbi.nlm.nih.gov/geo/samples/GSM807nnn/GSM807861/suppl/GSM807861.CEL.gz	ftp://ftp.ncbi.nlm.nih.gov/geo/samples/GSM807nnn/GSM807862/suppl/GSM807862.CEL.gz	ftp://ftp.ncbi.nlm.nih.gov/geo/samples/GSM807nnn/GSM807863/suppl/GSM807863.CEL.gz	ftp://ftp.ncbi.nlm.nih.gov/geo/samples/GSM807nnn/GSM807864/suppl/GSM807864.CEL.gz	ftp://ftp.ncbi.nlm.nih.gov/geo/samples/GSM807nnn/GSM807865/suppl/GSM807865.CEL.gz	ftp://ftp.ncbi.nlm.nih.gov/geo/samples/GSM807nnn/GSM807866/suppl/GSM807866.CEL.gz	ftp://ftp.ncbi.nlm.nih.gov/geo/samples/GSM807nnn/GSM807867/suppl/GSM807867.CEL.gz	ftp://ftp.ncbi.nlm.nih.gov/geo/samples/GSM807nnn/GSM807868/suppl/GSM807868.CEL.gz	ftp://ftp.ncbi.nlm.nih.gov/geo/samples/GSM807nnn/GSM807869/suppl/GSM807869.CEL.gz	ftp://ftp.ncbi.nlm.nih.gov/geo/samples/GSM807nnn/GSM807870/suppl/GSM807870.CEL.gz	ftp://ftp.ncbi.nlm.nih.gov/geo/samples/GSM807nnn/GSM807871/suppl/GSM807871.CEL.gz	ftp://ftp.ncbi.nlm.nih.gov/geo/samples/GSM807nnn/GSM807872/suppl/GSM807872.CEL.gz	ftp://ftp.ncbi.nlm.nih.gov/geo/samples/GSM807nnn/GSM807873/suppl/GSM807873.CEL.gz	ftp://ftp.ncbi.nlm.nih.gov/geo/samples/GSM807nnn/GSM807874/suppl/GSM807874.CEL.gz	ftp://ftp.ncbi.nlm.nih.gov/geo/samples/GSM807nnn/GSM807875/suppl/GSM807875.CEL.gz	ftp://ftp.ncbi.nlm.nih.gov/geo/samples/GSM807nnn/GSM807876/suppl/GSM807876.CEL.gz	ftp://ftp.ncbi.nlm.nih.gov/geo/samples/GSM807nnn/GSM807877/suppl/GSM807877.CEL.gz	ftp://ftp.ncbi.nlm.nih.gov/geo/samples/GSM807nnn/GSM807878/suppl/GSM807878.CEL.gz	ftp://ftp.ncbi.nlm.nih.gov/geo/samples/GSM807nnn/GSM807879/suppl/GSM807879.CEL.gz	ftp://ftp.ncbi.nlm.nih.gov/geo/samples/GSM807nnn/GSM807880/suppl/GSM807880.CEL.gz	ftp://ftp.ncbi.nlm.nih.gov/geo/samples/GSM807nnn/GSM807881/suppl/GSM807881.CEL.gz	ftp://ftp.ncbi.nlm.nih.gov/geo/samples/GSM807nnn/GSM807882/suppl/GSM807882.CEL.gz	ftp://ftp.ncbi.nlm.nih.gov/geo/samples/GSM807nnn/GSM807883/suppl/GSM807883.CEL.gz	ftp://ftp.ncbi.nlm.nih.gov/geo/samples/GSM807nnn/GSM807884/suppl/GSM807884.CEL.gz	ftp://ftp.ncbi.nlm.nih.gov/geo/samples/GSM807nnn/GSM807885/suppl/GSM807885.CEL.gz	ftp://ftp.ncbi.nlm.nih.gov/geo/samples/GSM807nnn/GSM807886/suppl/GSM807886.CEL.gz	ftp://ftp.ncbi.nlm.nih.gov/geo/samples/GSM807nnn/GSM807887/suppl/GSM807887.CEL.gz	ftp://ftp.ncbi.nlm.nih.gov/geo/samples/GSM807nnn/GSM807888/suppl/GSM807888.CEL.gz	ftp://ftp.ncbi.nlm.nih.gov/geo/samples/GSM807nnn/GSM807889/suppl/GSM807889.CEL.gz	ftp://ftp.ncbi.nlm.nih.gov/geo/samples/GSM807nnn/GSM807890/suppl/GSM807890.CEL.gz
!Sample_data_row_count	12029	12029	12029	12029	12029	12029	12029	12029	12029	12029	12029	12029	12029	12029	12029	12029	12029	12029	12029	12029	12029	12029	12029	12029	12029	12029	12029	12029	12029	12029	12029	12029	12029	12029	12029	12029	12029	12029	12029	12029	12029	12029	12029	12029	12029	12029	12029	12028	12028
!series_matrix_table_begin
ID_REF	GSM807842	GSM807843	GSM807844	GSM807845	GSM807846	GSM807847	GSM807848	GSM807849	GSM807850	GSM807851	GSM807852	GSM807853	GSM807854	GSM807855	GSM807856	GSM807857	GSM807858	GSM807859	GSM807860	GSM807861	GSM807862	GSM807863	GSM807864	GSM807865	GSM807866	GSM807867	GSM807868	GSM807869	GSM807870	GSM807871	GSM807872	GSM807873	GSM807874	GSM807875	GSM807876	GSM807877	GSM807878	GSM807879	GSM807880	GSM807881	GSM807882	GSM807883	GSM807884	GSM807885	GSM807886	GSM807887	GSM807888	GSM807889	GSM807890
10	6.379349534	5.551085803	5.439633531	5.500150429	5.786289644	5.81406789	5.755302069	6.30655416	5.37269694	5.521839949	5.829543383	6.17597164	5.722975431	5.844079574	5.884838474	5.809340556	5.362657462	5.955064041	5.091783151	5.311361565	4.931949758	5.14116803	5.503615136	5.520398837	5.821074647	5.551162166	5.560123649	6.325439794	5.227620566	5.404183994	6.237121257	5.334581002	5.668180742	6.042962093	5.941051697	5.596265966	5.923454219	5.738376925	5.900986356	5.562258397	5.439757756	5.737943591	5.88932783	5.629395815	5.908944125	6.463210152	5.801125567	6.066732461	6.010939046
100	4.903603583	5.009954696	5.115739026	5.167668652	5.083582323	5.138324119	5.550779223	5.187174451	5.212397654	5.375153336	5.366843268	5.166428635	5.306188321	4.977946464	5.089667933	5.26178032	5.078451881	5.317058006	5.113525487	5.422853119	5.686998002	5.271139941	5.153135896	5.019497455	5.16964403	5.489934604	5.096881956	5.302609209	5.565777751	5.205289733	5.053251107	5.188457105	5.2133536	5.259001706	5.524351999	4.935587129	5.297712044	5.315555821	5.213393287	5.317087862	5.352310249	5.215416872	5.120122247	5.250190577	5.339484497	5.644205494	5.40573018	7.162623317	6.994910055
1000	7.672074209	7.78027992	7.747215171	7.859519416	7.915374235	7.881664769	7.782365093	7.542320751	7.843312388	8.143522502	7.705392851	7.701826252	7.714363503	7.944184933	7.76275857	7.782826906	7.893764573	7.754532429	8.156632653	7.373716761	7.61703466	7.86606411	7.544399836	7.861043815	7.757739554	7.827883105	7.767692564	7.072536465	7.702829741	7.841646053	7.671115364	7.860733186	7.727741535	7.729783509	7.430446427	7.878590668	7.676309876	7.60148128	7.678582619	7.746277804	7.654189673	7.445472099	7.753560249	7.52943167	7.397648408	7.541201575	7.541141647	6.075411633	6.205318636
10000	4.152414634	4.010073293	4.050340712	4.018737914	3.983840909	3.992670681	3.888721043	4.120259629	4.164255741	3.929931442	3.819783368	3.93513987	4.182752193	3.916074179	3.934632197	4.280369844	3.929016284	3.991161399	4.024429013	3.828853357	3.963342918	3.908251138	4.007259645	4.129338331	4.159744498	3.983612136	3.935608663	4.082565918	3.862612021	4.048486204	4.09791884	4.007908042	4.231559601	4.084883126	4.27122153	4.055753063	4.082917367	4.127397206	4.073527388	4.073634437	3.875469792	4.2365075	4.251773701	4.237474611	4.523447007	4.551115347	4.55337686	4.384905945	4.342752948
10001	5.368089364	5.565089673	5.25953239	5.475387911	5.522984967	5.480914822	5.933341596	5.335943415	5.699003934	5.303839495	5.719782815	5.43296943	5.133347331	5.591719098	5.232322962	5.216933384	5.44079732	5.36987814	5.693450546	5.485130241	5.541168818	5.829795842	5.378549612	5.104978292	5.241369056	5.401310488	5.286979764	5.207415787	5.383519242	5.208587917	5.255194294	5.788522042	5.18061181	5.347642975	5.25126586	5.395608304	5.171852769	5.111447906	5.317679219	5.037576632	5.598760358	5.243780985	4.980079798	4.988967864	4.6719786	4.838721627	5.045125431	6.363055975	6.251090243
10002	4.232358356	4.365250006	4.660357065	4.343778402	4.318478917	4.419422408	4.310655078	4.382126956	4.364329941	4.513109289	4.429002143	4.42401483	4.642310472	4.406916655	4.41062007	4.588350269	4.238931472	4.472952266	4.356003306	4.20176118	4.444931601	4.142623394	4.379772641	4.452674784	4.350577276	4.342081304	4.376136399	4.508652903	4.310475067	4.380541244	4.545931067	4.118038167	4.445701055	4.410382143	4.612858929	4.527858391	4.479573009	4.582763342	4.258700555	4.516902678	4.556724295	4.493913553	4.479010105	4.399754934	4.671352368	4.495221697	4.648016994	4.669985796	4.765487934
10003	3.417461982	3.581575245	3.555588783	3.632098722	3.596571375	3.72314347	3.591896592	3.632233576	3.589340701	3.632363786	3.534976716	3.372618267	3.454319724	3.438569847	3.440695484	3.433073389	3.615131584	3.465034879	3.541430034	3.628035514	3.501152072	3.395395952	3.520215207	3.487023094	3.655700017	3.564601327	3.576233001	3.527617517	3.360581215	3.481731171	3.520810854	3.500299251	3.535251833	3.466334746	3.519886277	3.408495162	3.565650696	3.743321915	3.518163746	3.646878959	3.517435382	3.532641536	3.672862762	3.536748961	3.566342838	3.840462414	3.539052854	4.020198762	3.972883167
10004	4.145291813	4.345363049	4.413066502	4.278934412	4.369663322	4.132825022	4.379503291	4.445451892	4.024983488	4.244273918	4.136527977	4.164965845	4.385483326	4.179762491	4.35923078	4.565724024	4.199799798	4.267141972	4.125908652	4.603436894	4.101179959	4.254085489	4.457790133	4.162511286	4.631746671	4.24371202	4.121629858	4.603965725	4.341678853	4.241604645	4.342772997	4.243662487	4.315882479	4.457450434	4.420005147	4.124525651	4.292158849	4.390132627	4.257990417	4.217837391	4.485654099	4.382990831	4.350596211	4.339084376	4.577838938	4.635228126	4.219604559	5.530701947	5.45106677
10005	7.560516948	7.74735111	7.815523494	7.868791056	7.79526289	7.657136527	7.075197397	7.59695171	7.577022433	7.47822806	7.963736544	7.432875344	7.069747743	7.911609079	7.563632554	7.654336767	7.533496019	7.213743048	7.747386245	7.193396851	7.411234554	7.543175527	7.79117421	7.460332206	7.444363958	7.365085165	7.596015843	7.703215842	7.454770797	7.547092721	7.739896158	7.576765532	7.599511623	7.75597159	7.234514166	7.521661488	7.617408682	7.461724172	7.695284144	7.715529303	7.932480956	7.556939956	7.592501868	7.349261905	7.231644596	7.523203495	7.30157909	9.152710463	8.683107691
10006	7.478984242	7.391425898	6.889686104	6.960150053	7.137960895	7.2228838	7.618371262	7.40626084	7.709769067	7.290204752	7.427047106	7.409607147	7.156157787	7.483308827	7.246328528	6.697070175	7.593259531	7.211088458	7.631987234	7.694945711	7.547247312	7.630520109	7.012072661	7.130939084	7.258767331	7.645517618	6.785343004	6.938405946	7.274299696	7.210468499	6.978624786	7.617564796	7.105310138	7.057327556	7.078201926	7.293018972	7.179688554	6.977510598	7.444779572	6.740450257	7.366904422	7.096410631	7.021967264	7.130532925	6.921651604	6.28339284	6.670372213	8.916077639	9.014729117
10007	8.578923255	9.439415108	9.182557053	8.883055453	9.291086006	9.072803812	8.436727862	8.850181145	8.539461851	9.161302544	9.041840499	8.707472149	8.83857556	9.4957663	8.805036322	9.186670653	9.222186902	8.78841862	8.943201953	8.504749713	8.225149012	8.406549896	8.818346822	8.936917151	8.559936899	8.678894779	8.821752209	7.719084732	8.589009006	8.575630438	8.910313589	8.719266097	9.068624725	8.900727657	8.480084752	9.274234543	9.323243355	9.1829652	8.959054618	9.342218664	7.819499353	8.597762019	8.895808159	8.378946286	8.602848999	8.449728009	8.299840028	8.757175882	9.173399574
10009	3.364411141	3.476306144	3.458349808	3.424115358	3.283725746	3.396081864	3.296714388	3.448897731	3.437652367	3.508404059	3.493357806	3.547264042	3.461017681	3.384695728	3.444457292	3.510568389	3.470591849	3.503610719	3.407815868	3.4047396	3.465718966	3.551454146	3.341030916	3.50669329	3.50786101	3.449415579	3.537088846	3.616729269	3.51922375	3.51791123	3.618141002	3.588374634	3.572444013	3.568469169	3.662390723	3.504175204	3.550363549	3.435269433	3.473814494	3.573708196	3.55724305	3.546713878	3.595468297	3.449296028	3.605972874	3.691446099	3.866512036	3.873955381	4.074490849
1001	6.135128295	5.359758139	5.366447196	5.452846021	6.092481648	5.460811581	6.322652305	6.002036361	5.940946063	5.861137316	5.911572363	6.552047766	6.123167317	5.430014771	6.257496268	5.558459861	5.651802136	6.118580232	5.439008798	6.173642309	6.000555569	6.336428035	5.540921221	6.020413499	5.7731104	5.992001532	6.029915249	6.18705716	6.141131026	5.796927666	5.467380077	6.775550096	5.422465638	5.374578821	5.576712924	5.338668304	5.544818074	5.603048552	5.425929163	5.664922154	5.409839694	5.610603762	5.364467877	5.594627476	5.915688948	5.691876601	5.740404226	6.058307289	6.180773346
10010	5.744885264	5.673742254	5.448884121	5.725856772	5.817890366	5.69096812	6.252863523	5.608634099	5.865268674	5.783776552	5.709999896	5.670815243	5.541948357	5.767900159	5.885086826	5.469336515	5.713600092	5.971715233	5.811769804	5.885189826	5.827684916	5.865824367	5.858635494	5.531776085	5.696419093	5.95768523	5.637622103	5.640614121	5.744666157	5.677983004	5.679102005	5.7846793	5.496798004	5.51156019	5.445688074	5.742521656	5.584603517	5.449825055	5.721575337	5.566540106	5.599445342	5.67632617	5.438562636	5.465535716	5.353954854	5.375860239	5.22248128	6.111414027	6.262018116
10013	7.725708067	8.136894388	8.233228344	8.163737874	7.888885529	8.130452082	6.98336379	7.98094489	7.468760245	8.164592759	7.554939547	7.763339599	7.891383416	7.866476975	7.66670555	8.31090438	8.101365446	7.529655128	7.926206046	7.12342299	7.363629557	7.708553445	8.105784217	7.890538999	7.957587734	7.469246613	8.125826847	7.400018209	7.78784411	7.956443301	8.232907879	7.55706511	8.340765178	8.290848152	7.694246348	8.067353465	8.325826897	8.089676273	7.939889726	8.336190808	7.323271573	8.048125972	8.209272712	8.297756598	7.942361532	8.254836909	8.279005674	7.332720645	7.469420523
10014	6.027779667	5.94972107	5.856877057	6.199039882	6.024086234	5.949627585	5.664938493	5.711124676	5.852037577	6.055316591	5.781973722	5.766371664	5.883366505	6.003967449	5.786965521	6.242034178	5.851528687	5.782271749	5.620627209	5.853066911	5.6328458	5.543262336	5.992494155	5.722933348	5.6858471	5.509544807	6.024676529	5.674890153	6.148598828	5.845239723	6.082611468	5.617311058	5.878344199	5.74258964	5.932908258	5.926490651	6.080003867	5.970418113	5.77787478	5.980563212	5.875795149	5.8202582	5.821460675	6.040104331	6.274227015	5.732998567	5.902841594	7.854651659	7.173390899
10015	8.811249334	8.824512744	8.745165399	8.205067894	8.599082181	8.919946012	8.882839655	8.622982565	8.6426799	8.844063892	8.533248671	8.705143095	8.674190273	8.860765184	8.92407433	8.641053817	8.922426497	8.800242803	8.995611314	8.705801551	8.899238725	8.91502877	8.683208793	8.769352257	8.557079427	8.677149221	8.401575247	8.758265298	8.700851444	8.655599077	8.988899691	8.990643007	8.843526318	8.765018742	8.758107492	9.081794864	8.825824112	8.707304727	8.959910288	8.725300916	9.408965211	8.96446163	8.890986505	8.721022833	8.313675661	8.299424635	8.496086037	9.816210304	9.781167957
10016	8.681785507	8.375095508	8.686516381	8.622642507	8.668700593	8.534985222	8.800947499	8.357326703	8.744075136	8.48090147	8.817868342	8.709042	8.391795388	8.800645622	8.73807751	8.626884792	8.56238723	8.425031719	8.637621382	8.680609088	8.650191705	8.63750129	8.524169768	8.381663239	8.152751203	8.588652813	8.495054007	8.663396911	8.383334364	8.450282969	8.472441342	8.705585017	8.434044754	8.602920255	8.191980023	8.576912041	8.570837789	8.392344632	8.476153772	8.300016496	8.395159598	8.28811089	8.251419945	8.326195767	8.304114511	8.094296681	8.073317754	9.902031526	9.712319896
10017	4.197204182	4.396768009	4.502085311	4.341745373	4.277579991	4.411523717	4.256105655	4.351505832	4.35591278	4.349608384	4.470018317	4.191257551	4.448534106	4.329894704	4.260013577	4.552483174	4.410063261	4.289445059	4.188185939	4.087247668	4.205890701	4.270425939	4.294919875	4.367703099	4.560698294	4.20386206	4.691081967	4.302798426	4.388119218	4.113085014	4.278631955	4.099481075	4.273603471	4.425010977	4.533016749	4.396423312	4.401949612	4.574971111	4.301988588	4.354151557	4.434106271	4.228714672	4.380646754	4.404063095	5.013893422	4.875061059	4.967113431	4.598318186	4.718744472
10018	3.829782585	3.746805424	3.982722195	3.872143346	3.878710011	3.792535704	3.850813661	3.712542483	3.922285102	3.791502605	3.735148872	3.784003038	3.795119778	3.808892363	3.754474452	4.063924822	3.874882416	3.836549931	3.791266146	3.796871082	3.819099584	3.804098489	3.728185491	3.868197715	3.805495393	3.740516499	3.887434703	4.027666087	3.733261425	3.780256603	3.880956002	3.815447751	3.932314406	4.029841141	3.885496616	3.79503092	3.92483818	3.815006527	3.732233079	3.847911108	3.82117328	3.908531531	3.87577994	3.825753345	3.847716944	4.128191402	3.859784721	4.14857412	4.11460484
10019	6.293977986	6.261830985	5.807598677	6.388571325	6.350324235	6.610389928	7.329817855	7.106787314	7.087806838	6.798447275	7.242721483	6.224435132	6.666742865	6.531398622	6.450873628	5.789670097	6.403778978	7.060066146	6.636092217	7.711449917	7.307898774	7.164861699	7.019391613	6.129968156	6.761950713	7.55347439	6.133379242	6.945751544	7.577176854	7.128106206	6.010952688	6.945328585	6.657933341	6.552140302	5.936140745	6.380730432	6.383458821	6.589446373	6.489584066	6.285084794	6.198987679	6.103626842	6.057176985	6.360097771	6.351824441	6.070916793	6.390561062	10.02714722	9.846209043
1002	4.489823563	4.408469658	5.048848468	4.740260599	4.323774755	4.63078757	4.515434754	4.4106003	4.466757778	4.822450695	4.552485625	4.369320254	4.628100676	4.542594178	4.482221451	4.695659082	4.61276652	4.65093418	4.637635508	4.48045405	4.530348179	4.46562786	4.630942477	4.863521985	4.650505443	4.358309086	4.663456909	4.700626838	4.675207796	4.504667101	4.463690802	4.43586275	4.633273483	4.872604755	4.913874645	4.820199555	4.564394516	4.902881258	4.559897273	4.583105157	4.767052948	4.605706182	4.84484239	4.684645075	4.989023579	4.999737607	4.860079616	5.178351824	5.118788658
10020	6.527248407	5.918746321	5.880925696	6.2424567	5.898509413	6.135354174	6.140870495	6.116895443	5.881657529	5.817439943	5.826002924	6.095791747	6.195275913	6.231606712	5.74903998	6.150002801	6.143671494	5.77904751	6.534809264	6.548155827	6.314950039	6.600091854	5.799467741	5.978192853	6.224683287	6.128799688	6.491728257	6.699457602	6.330052365	6.201323713	6.310649605	6.348263003	6.02371981	5.869749097	5.954842223	6.262356807	5.976940598	6.204628518	6.320331015	6.264683561	6.417275373	5.978759833	6.063677332	6.104610081	5.516381903	5.78171143	5.91900811	8.265709964	8.365906669
10021	4.117303772	4.176265669	4.209537207	4.159553237	4.337706202	4.387158951	4.341792625	4.240811889	4.124539815	4.328636338	4.219811838	4.196881087	4.298874061	4.228834944	4.208743281	4.576963981	4.097427825	4.179066704	3.992431607	4.046391749	4.21839455	4.107744901	4.259530133	4.245008023	4.37027868	4.160995327	4.169679109	4.191980268	4.143039184	4.368287523	4.169807209	3.967052947	4.093921879	4.24569351	4.40621346	4.054363073	4.182739528	4.18341335	4.130645393	4.437439797	4.584736432	4.4055219	4.291825081	4.410339629	4.585742417	4.660470262	4.740094985	4.484640836	4.533650128
10022	3.776838174	3.816661883	3.878520332	4.017222189	3.845269437	3.973646393	3.643310887	3.703237078	3.819306969	3.873614395	3.749112064	3.736870641	3.984385747	3.786280519	3.834146753	4.028084649	3.673291604	3.945979764	3.632527024	3.817565393	3.733733968	3.643967749	3.947973454	3.787652202	4.071688583	3.783049767	3.843202171	3.88583444	3.698545251	3.897663186	3.939849498	3.559543069	3.924932036	3.940707442	4.12970825	3.991478294	3.94107743	4.116257635	3.817621107	4.046461929	3.918603968	3.975870464	3.963287886	3.885543605	4.328927497	4.600528043	4.302955597	4.443691571	4.327761744
10023	4.967885677	4.978944464	4.724727528	5.044297826	5.20823785	5.069282351	5.144135429	5.120557081	5.312611778	4.977570385	4.964180743	4.988707763	4.9048484	5.119818828	4.977689442	5.614755212	5.119849784	5.119718439	5.084321804	5.441760474	5.100095512	4.654269716	5.120953048	4.839630616	5.161333561	5.290623606	5.362917072	5.32853913	5.162944108	5.248724523	5.002928732	4.942278069	4.763859324	4.870084793	5.484382881	4.765013936	4.509028328	4.809416849	4.688368415	4.934043287	5.200422922	5.235078757	4.930453697	5.009590332	5.232501993	5.170071937	5.363728534	7.047863919	6.722356294
10024	6.368515496	6.563467402	6.81378233	6.626728759	6.473282988	6.544556866	6.459281159	6.476633202	6.483334227	6.444126932	6.52784953	6.42955354	6.693997811	6.234953604	6.670135076	6.854280712	6.616077275	6.592688773	6.321445436	6.606944835	6.444457178	6.186139363	6.420918042	6.63326656	6.72396765	6.331400652	6.49222549	6.358328961	6.624109686	6.634618915	6.466751398	6.259465637	6.493238169	6.559493895	6.916020085	6.544767582	6.430903555	6.578713327	6.384617126	6.651938172	6.614866418	6.695158987	6.778680129	6.695321256	7.307249101	7.316854406	7.147921516	6.223854389	6.283655667
10025	5.49752086	5.416623423	5.525829622	5.507240437	5.620734042	5.498597383	5.303230248	5.42327602	5.306287003	5.42498021	5.501869635	5.451630463	5.604751009	5.50223752	5.47832764	5.804493081	5.320838486	5.228023576	5.306885162	5.312696142	5.434016423	5.398600101	5.655186965	5.642595068	5.345405029	5.374410351	5.679498657	5.426755394	5.430409077	5.487128533	5.505694296	5.452739431	5.369992407	5.294453194	5.449423035	5.460312601	5.466617258	5.575978436	5.483768256	5.554062709	5.64921598	5.508883839	5.504942578	5.409685682	5.575603582	5.680799708	5.647790718	6.332958426	6.104847946
10026	8.407948376	8.481906601	8.319842754	8.351060522	8.329540083	8.180459833	8.140917159	8.528867319	8.451611811	8.409162161	8.158487206	8.488359152	8.465740517	8.548333315	8.175309873	7.754118846	8.219322626	8.374543131	8.806545017	8.307632929	8.5534608	8.695072552	8.339181777	8.487648816	8.412627339	8.895302976	7.645042572	8.55069234	8.185980047	8.6173832	7.938426141	8.603606775	8.603249632	8.390699692	7.729827993	8.458551165	8.312815388	7.925237245	8.464819382	8.005311168	8.202015063	8.173963198	8.439510614	8.231875433	7.846727492	7.336488849	7.803853155	9.632729366	9.581946143
1003	4.907945679	5.067853623	5.162781471	5.252120514	4.723396256	4.945429085	4.656535605	4.741669399	4.931121609	4.820975494	4.709930834	4.784578464	5.088504812	4.801637927	4.756524142	4.639671541	4.802511766	4.858644166	4.770962061	5.052700839	5.005762691	4.854433029	4.802862013	5.179607693	5.118486291	5.051325717	5.609116013	5.230815896	4.828558777	5.258028489	4.818751931	4.75620786	4.80180624	4.626212132	4.867865707	4.798246361	4.67403362	4.732507838	4.706251204	4.648081061	4.871840975	4.797231668	4.833638624	4.909277344	4.798068822	4.734095075	4.849822166	9.529521467	9.206262956
10036	4.999171884	4.989931214	5.346689564	5.260965712	5.262050733	5.063005918	5.216667977	5.035966506	4.970724956	5.159227591	5.132083173	5.003664788	5.272067345	5.094682425	5.117513712	5.196953672	5.091757863	5.145694842	4.867387268	4.86404454	5.001162804	4.934226249	5.20878069	5.141070551	5.057799045	4.846068967	5.175245574	5.096623922	5.078425502	4.932800501	5.076263039	5.059093412	5.161475124	5.163558062	5.243514787	5.124430183	5.160604672	5.212357615	5.00640988	5.260778863	5.090157893	5.10260861	5.264106672	5.184581935	5.386852524	5.365535617	5.549842278	5.817391039	5.548676678
10038	7.243453772	6.95863568	6.902567444	6.935247637	6.971725236	7.004687311	7.11987928	7.009378497	6.816248177	7.117792695	6.782526018	6.998681567	6.795276183	6.891479468	6.785957873	7.151436426	6.872352521	6.761986786	7.001406041	7.150338001	7.02996709	7.027284541	7.378493333	7.04019421	7.01053355	6.840568823	7.068828078	6.998815298	7.013113179	7.047375196	6.976176359	6.868291075	6.911380334	6.961745289	6.431349111	6.995650033	6.915984918	7.052486154	7.0325646	6.756478646	6.894751231	7.002705248	6.634797633	6.503447309	6.637614728	6.403962985	6.757655026	8.85862277	8.556056282
10039	6.009797872	5.896280529	6.212194531	5.956543998	5.790430043	5.812124808	6.072065797	6.010230755	5.945613341	6.072481629	6.459696139	5.724831862	5.452358881	6.143126757	5.827616782	5.442423776	5.940365804	6.074728136	6.099071737	5.675193126	6.097400128	6.290131658	6.027950263	6.149194747	6.088358921	5.979319447	5.926840144	5.724129903	5.831084148	5.855055639	6.070151893	6.449926343	5.810422092	5.970359117	6.022716954	6.063846102	5.821390256	5.905999743	5.734464721	6.026288687	6.345825576	5.548579682	6.127312559	5.840154479	5.925632798	5.921699626	5.706861584	7.086244111	7.283820978
1004	5.377770421	5.247954638	4.863124096	5.246009189	5.963301679	5.416054976	7.134946757	5.603358667	6.561174651	6.068240935	6.353117889	5.520644563	5.480343347	6.682635185	7.278819188	5.207400599	6.072473241	6.675758754	6.222037318	5.867714453	6.614130951	6.782734612	5.732296253	5.451680349	5.605495468	6.4885932	5.894579161	5.177458465	6.107337209	5.977855328	5.34508836	6.176221259	5.28818405	5.385625488	7.668365129	5.260118923	5.023411756	4.860747061	5.358216917	5.201118163	6.827887204	5.157641944	5.42952192	5.244182363	5.061140754	5.207481734	5.35444818	4.479833807	4.389718688
10040	8.913180469	8.874359498	8.947693609	8.710201417	8.693248214	9.020237143	8.860000509	8.729956208	8.840588949	8.982533682	8.545366302	8.879237183	8.788710237	8.945556071	8.813603973	8.333020419	8.91330064	8.72702616	9.227325364	8.356617282	8.973930072	8.823912612	9.000000841	8.854705141	8.973401475	8.857311624	9.083646144	8.437296816	8.860642604	8.421067248	8.93495368	8.965957557	9.040620107	8.898014651	8.732498493	8.923419622	8.856235606	8.708861623	8.948516207	8.992060265	9.039240007	8.963782206	9.078762235	9.048092795	8.737492159	8.848496795	8.57608159	8.532792942	8.686699968
10042	6.227224101	6.236693626	6.3401636	6.426319912	6.328868147	6.104057858	6.365820017	6.347350536	6.130607477	6.211115625	6.285766687	6.092288315	6.325272362	6.171996299	6.314527599	6.148229673	6.262334356	6.19237981	6.402685513	6.483067698	6.486378172	6.497761252	6.395584096	6.341297641	6.248791783	6.174789625	6.117518095	6.360439476	6.352435763	6.37750287	6.159208518	6.206849476	5.846104719	6.116732631	6.135005902	5.971872128	6.271139976	6.034537271	6.164603365	6.198533476	6.432731329	6.24467382	6.075468766	6.054629485	6.164412772	5.94552669	6.212243079	7.63306394	7.754492709
10043	5.872448233	6.020747063	6.023126408	5.812461638	5.964701622	5.972558758	5.745126891	5.635663522	5.720103223	6.086428615	6.076505179	5.559507732	5.705645229	5.990777864	6.030762398	5.887087274	5.942528409	5.876690632	5.696522685	5.62299065	5.685521253	5.630034391	5.72273334	5.681299531	5.703620734	5.746889824	5.961141303	5.633820127	5.625376472	5.626866451	6.191996678	5.884261151	6.235566909	5.897003894	5.92628508	5.931436549	5.9579582	5.921690052	5.856018082	6.202535538	6.042101163	5.903147611	5.84242989	5.8420383	5.774186627	6.150401787	6.076324772	6.761763153	6.771526204
10045	4.086576934	3.993626636	4.3395167	4.107744901	4.272664178	4.15521326	4.263394198	4.290581508	4.055026357	3.856160676	4.103346863	4.153266833	4.104081202	4.132402255	3.904189916	4.469342598	4.1117629	3.9806156	3.962213498	4.10283417	4.090734687	4.066795525	4.12161645	4.160636238	4.140762002	4.196367442	4.117287055	4.00456665	4.175603177	4.036807299	4.240947138	4.0718346	4.106607289	3.956698705	4.042870252	4.16554398	4.117340969	4.13795767	4.102954337	4.115571766	3.926296652	4.105972211	4.147259628	3.994560974	4.245398938	4.270623472	4.234011553	4.394844876	4.52556127
10046	4.854949094	4.649097611	4.653085799	4.815145913	4.709560813	4.762428596	4.567875042	4.663309482	4.488275773	4.697727419	4.644290877	4.689982607	4.931368017	4.679244157	5.005788547	4.951971799	4.843797512	5.168689768	4.66375119	4.621499964	4.643307153	4.543060833	4.732447162	4.931554085	4.802759705	4.587717785	4.76294622	4.772061794	4.766346269	4.680486908	4.712257327	4.688540587	4.796268066	5.026200137	4.787303247	4.664405964	4.877785549	4.691371954	4.625047243	4.777435557	4.802330369	4.857815192	4.81010557	4.840594589	4.846153118	4.580631176	4.706346547	5.854727319	5.854066705
10047	4.708470704	4.817306493	4.918406976	4.988879407	4.773720725	4.811510222	4.827258013	4.929888669	4.715586632	4.856864519	4.69914795	4.736965707	4.796624578	4.702429907	5.143026286	5.04517249	4.893983444	4.754029271	4.690608291	4.779880186	4.919673381	4.662750179	4.860123007	4.923867092	4.833822892	4.784932478	4.746597993	4.928488376	4.615261681	4.962460703	4.732081234	4.677515633	4.912799036	4.963852834	5.065970156	4.790924225	4.842007246	4.809588674	4.744268414	4.943170051	4.917621523	4.80251282	4.987074768	4.932654902	5.179966044	4.99553424	5.005538826	5.622047513	5.654496678
10048	5.746229033	6.070897301	5.753698917	5.981496482	5.707551571	5.809240294	5.741681411	5.82142491	5.893859772	5.790481456	5.870297336	5.821087335	5.775720459	5.90755799	5.677939952	5.512572051	5.947500641	5.636979621	6.083520183	5.866992917	5.740942596	5.878690206	6.088360605	5.903018293	5.85730976	6.151275444	5.950697561	5.753026228	5.750371382	5.870359735	5.80894572	5.681562891	5.803372273	5.798548779	5.518560882	6.064349581	6.024381103	5.883881617	6.051862509	5.730509858	5.582336285	5.948104886	5.830526886	5.846709689	5.380865793	5.545602985	5.428100862	7.395843537	7.47325505
10049	5.976238371	5.915186998	5.865739515	5.962353426	6.096330486	5.783333605	5.997703446	5.797237331	5.817479689	5.515964273	5.625780277	6.192142947	5.557155261	5.858173817	5.869896258	5.797808202	5.750756159	5.877006434	5.809587922	6.109529959	5.806541087	6.183455834	5.527264892	5.497342205	5.71503077	5.750068677	5.725077074	5.911685326	5.971892734	5.680287918	6.01886908	6.285082214	5.874137396	5.872883745	5.723487965	5.675970352	5.908737642	5.762646134	6.08677653	5.501773967	5.86551927	5.80174465	5.987153637	5.603775642	5.683768474	5.39630596	5.483565363	8.989380878	9.328890318
1005	4.564691835	4.511319261	5.005434906	4.630672792	4.408242964	4.700061018	4.38038461	4.701851201	4.573793755	4.419065279	4.667090894	4.649269344	4.53299017	4.512586008	4.59646183	4.99768454	4.519923986	4.586385574	4.450428145	4.464467437	4.495128404	4.525653197	5.006910426	4.648591795	4.64285621	4.517213457	4.735617857	4.677269086	4.50461746	4.57449973	4.667296074	4.470633496	4.645299735	4.81591144	5.159771325	4.529014018	4.549546116	4.986639632	4.583245644	4.605731541	4.531359602	4.606082173	4.639210549	4.869718724	4.887422684	4.680829411	4.480783033	5.191064321	5.304750884
10050	5.329946025	5.295858263	5.488679003	5.414749905	5.139560984	5.4322869	5.758116829	5.438995631	5.477015018	5.522937667	5.601512834	5.367440079	5.555747987	5.390989732	5.332488766	5.450750052	5.202899237	5.314557413	5.311390281	5.221063816	5.597544991	5.456842608	5.437593543	5.465361333	5.557351606	5.354928374	5.313350099	5.394555242	5.489421231	5.663382773	5.27466092	5.324161174	5.386581552	5.626483115	5.927788715	5.394586254	5.401449649	5.35440351	5.372943566	5.637854317	5.343121043	5.561913999	5.644354396	5.548300787	5.762147075	5.684701944	5.647970972	5.355862353	5.410854146
10051	5.116048272	4.905061071	4.782692712	4.821870863	4.82921252	4.838825878	5.552331774	4.945942868	4.983549911	4.977032777	4.987053549	5.109991339	4.931388665	5.219279227	5.009625332	4.600123713	4.964770009	5.08641034	5.084131042	5.35494309	5.3705864	5.036018846	4.837694798	4.876496369	4.972764103	5.183467697	4.661248014	5.230184857	4.949642981	4.828223085	4.991540697	5.513160492	4.724917457	4.743295922	4.838887787	4.973720336	4.774607466	4.90874724	4.869289161	4.70106024	4.773782544	4.871058982	4.684924943	4.830425009	4.835334873	4.531531267	4.616220811	7.003045949	7.231139322
10052	5.034554318	4.93454294	5.274819205	4.975483955	5.317170638	5.129491244	4.988472043	5.167998998	4.951660946	5.031228804	5.073953959	4.95864882	5.11288408	5.157836474	5.17357469	5.29037859	4.966274713	5.25589613	4.893614833	4.871059431	5.051808466	5.027756837	5.151342103	5.11882601	4.971612556	5.163827865	4.958450429	5.353394125	5.164430463	5.102897932	4.971612556	4.920271901	5.054121796	5.294172049	5.343289993	5.032026303	5.016227587	5.020429682	5.012005978	5.092620686	5.02102887	5.192478021	5.255922618	5.008720744	5.318161337	5.465812131	5.119708512	4.788248488	4.976806899
10053	8.05935306	8.216708522	8.748708083	8.554441362	8.443181734	7.98183925	7.466059296	8.317913481	8.043803101	8.581812346	8.139886328	8.447574768	8.315649376	8.290105039	8.318785009	8.744729115	7.949583722	7.85749537	8.279048947	8.073148169	7.88491045	8.26439406	8.353194761	7.962114895	8.150706907	7.408919837	8.757474768	8.425568237	8.129180957	7.778223311	7.992903157	8.313199166	8.555184384	8.589064767	7.887340951	8.699127134	8.570112881	8.779470834	8.237628549	8.79392199	8.610758965	8.757288263	8.586553264	7.575408825	8.420257129	8.607922149	8.649522887	6.937263141	7.606136081
10054	9.804240899	9.821168659	9.542594018	9.494120907	9.414962331	9.462277028	9.870697324	9.527537127	9.847970938	9.472204029	9.50280984	9.54074088	9.536187127	9.554240394	9.494999767	9.281657774	9.653799184	9.340536263	9.656015719	10.00254314	9.66981826	9.630265467	9.838629635	9.488610439	9.442760039	9.615206929	9.198185609	9.760368157	9.546377731	9.459704681	9.214025152	9.388742067	9.393672559	9.370543287	8.8010019	9.493441879	9.39438681	9.417179058	9.656046387	8.664461424	8.986724066	9.497815102	9.387239169	9.572253144	9.312097161	8.051145398	9.066575333	11.17914036	11.47133431
10055	7.124588575	7.576768071	7.146724941	7.64742026	7.578115606	7.165509573	8.209156132	7.134811391	7.77390372	7.710206739	7.74982603	7.489530085	7.34417393	8.008546303	8.00720722	6.967864767	7.497176068	7.875532524	7.469433147	8.003440995	8.156623605	7.698732174	6.988537661	7.573387005	7.117998111	7.763614064	8.002278559	7.660899747	7.792733314	7.536909618	7.348006363	8.035335566	7.129128582	7.327430839	7.540278503	7.008665903	7.264327963	7.0137535	7.172452746	7.640619107	7.636328766	7.053387965	7.323598583	7.061447726	7.117804539	6.979433146	6.923990099	10.72240164	10.85855558
10057	6.253742034	6.428223216	6.451822937	6.149326358	6.635557829	6.466119596	6.670583444	6.54908494	6.643334877	6.202472268	6.773211647	6.662558316	6.987916438	6.479438586	6.80258418	6.337682042	6.584413678	6.638444501	6.269883565	6.667178169	6.601071535	6.654509162	5.956964986	6.492162499	6.53039712	6.438607701	6.670588792	6.760109624	6.370832607	6.478462014	6.454206889	6.254055751	6.499275341	6.664666186	6.801105667	6.514634249	6.800848499	6.803433484	6.540106461	6.62890134	6.535946539	6.666097012	6.395707597	6.764923818	6.91016514	6.650630084	6.903800959	7.277705964	7.428154041
10058	6.68081552	6.427163268	6.453735267	6.304567407	6.396320965	6.426403396	5.825568263	6.271119142	6.148305251	6.808177264	6.192312702	6.626193095	6.762890368	6.636698411	6.324101302	6.541709273	6.250023818	6.827213135	6.41173566	6.530830519	6.626743298	6.435024233	6.305481823	6.453864837	6.327492101	6.31069792	6.755327925	6.133603066	6.199892856	6.280224553	6.167978447	6.402894777	6.474384888	6.484305866	6.725657197	6.56452855	6.694526685	6.479592597	6.456457643	6.510614587	7.293826298	6.416108305	6.503859885	6.276173985	6.388972019	6.49774886	6.569501908	6.936503035	7.226851413
10059	6.28452542	6.519095714	6.460175315	5.882989243	6.549145947	6.218489528	6.70022006	5.992676459	6.263023981	6.182919454	6.608727161	6.490525596	5.939104996	6.707165556	6.180930483	5.89819116	6.378756965	6.339340292	6.625560911	6.764325693	6.655055834	6.679314339	6.367269757	6.295299178	6.106886926	6.641379759	6.356688704	6.804565029	6.301978377	6.49531235	6.382238856	6.779102054	6.231761186	6.172032528	6.505534231	6.18933751	6.203422435	6.345123998	6.254475977	6.296997368	6.707220474	6.213103133	6.244457194	6.281161113	5.48927502	5.607372302	5.751788478	7.665870286	7.44586776
1006	4.107990492	4.086601584	4.364339186	4.439701099	4.224416616	4.221053559	4.08211945	4.449372464	4.179910848	4.068687156	4.277915831	4.239369494	4.278271565	4.145771752	4.435174541	4.318674146	4.246605433	4.142285555	3.928359235	4.103144111	4.129705625	3.915656312	4.090579831	4.275963655	4.24328119	4.150340414	4.267160429	4.1643952	4.133090322	4.145902254	4.19903718	4.086072189	4.097309348	4.194559334	4.339455701	4.214518687	4.312475614	4.464771013	4.084514305	4.388471128	4.260383875	4.153899671	4.333710655	4.312153314	4.594288428	4.741402919	4.585484535	4.587789354	4.731860311
10060	3.765327683	3.784312363	4.027255247	3.824632137	3.91650192	3.819071811	3.881698115	3.841233727	3.941711389	3.818104897	3.79675699	3.920184257	3.735588705	3.761660168	3.780659675	3.950720677	3.732955023	3.964954949	3.814965492	4.000711808	3.781766515	3.788925276	3.864312772	3.852218222	3.879983614	3.896385946	3.89444903	3.91565152	3.798399618	3.839998034	3.884142247	3.766683268	3.748432982	3.903864644	3.982071098	3.851701093	3.881136173	3.857156575	3.806792443	3.916526539	3.759525245	3.871083215	3.71622601	3.923688123	3.866882689	4.16012668	4.095455283	4.369708029	4.443730515
10061	5.264678788	5.350043842	5.61918069	5.45543884	5.373017449	5.454391973	5.358305665	5.367665118	5.298496903	5.455705129	5.520422777	5.373011456	5.331357308	5.433563249	5.457314211	5.33627799	5.342409402	5.381181268	5.309998828	5.365514121	5.485438032	5.45212681	5.355669709	5.480441022	5.347270226	5.399171569	5.501301189	5.641485194	5.337800165	5.401301263	5.44019003	5.45985108	5.340367976	5.544547106	5.431764027	5.362165717	5.451431278	5.473743483	5.386317385	5.506112711	5.470980029	5.468577647	5.408442669	5.323955347	5.38664374	5.570987133	5.556880604	7.168470859	6.957647928
10062	6.497993177	6.656677019	6.453416403	6.295988661	6.444775615	6.565439331	6.571935146	6.485475884	6.428218539	6.29338237	6.364329889	6.189311903	6.185468286	6.662819222	6.367578126	6.312471584	6.443898512	6.158947516	6.636359533	5.964911638	6.378208611	6.272840747	6.641246924	5.973596115	6.310804307	5.930100132	6.2219837	6.091640426	6.072612744	6.292207468	6.554260258	6.594324294	6.5154616	6.612003234	6.255133003	6.673057399	6.131156495	6.331987134	6.469940891	6.725476875	6.453542869	6.436566088	6.674533879	6.327055491	6.265642179	6.75454166	6.407535479	6.710307438	7.089025338
10066	8.712356363	8.654377822	8.674397094	8.810920634	8.345466842	8.486804565	8.274059681	8.594162916	8.419873594	8.526958996	8.540420968	8.553777326	8.670830546	8.493606615	8.651532365	8.558972811	8.756903032	8.511391016	8.534598515	8.258326133	8.542164874	8.682749633	8.512475436	8.704294309	8.666016052	8.606340985	8.940874317	8.485908667	8.600976233	8.390529761	8.740349772	8.764623474	8.709867861	8.74121218	8.773967668	8.605079031	8.429710767	8.726602797	8.546762664	8.617280749	9.111927617	8.456677341	8.589153557	8.532540822	8.268415616	8.421030112	8.341222083	8.997084083	9.060637404
10067	8.251111266	8.101489623	8.173019426	8.087216072	8.242871404	8.191278826	8.228126835	8.141263974	8.25851763	8.346209501	8.258102098	8.344585683	8.184568552	8.288120928	8.238791142	8.271441605	8.124552789	8.256407019	8.2005972	8.097303011	8.232267479	8.320893852	8.221146168	8.202392938	8.235772827	8.368534636	8.261699386	8.297943441	8.273532927	8.232782237	8.124248711	8.299720096	8.2229919	8.332532605	8.30170664	8.248994174	8.138976444	8.465895337	8.206165086	8.365757008	8.285168827	8.145979784	8.165333393	8.147310509	8.273260341	7.95016968	8.190123667	10.27225937	9.808390206
10069	8.32815356	8.112321545	7.94048412	7.908346993	8.270763796	8.055629008	7.765707098	7.986403821	7.618139036	7.908486526	7.813986055	7.938111564	7.808693432	8.089573445	8.049238078	8.217632672	8.245861833	7.812483643	7.938284095	7.790134512	8.146006793	7.839321874	7.945764289	8.019112378	8.113899915	7.658031709	7.669630837	8.067188299	7.689147281	7.973909839	8.228084483	7.938978929	7.99596166	8.019481972	7.771458007	8.100784138	7.887567763	8.078350139	7.938187281	7.827495593	8.238411906	7.962367713	8.189023282	7.774348227	7.691734298	7.509045247	7.921017915	8.361060661	8.247442758
1007	5.929144792	5.574057298	5.639915833	5.622481847	5.51041231	5.803493238	5.413398032	5.931230005	5.713542659	6.024556648	5.614249291	5.671379227	5.72436402	5.789809336	5.560672811	5.627757602	5.700563974	5.630986523	5.955502766	5.569233948	5.387637699	5.650333374	5.763373626	5.852329128	5.893209823	5.234206313	5.763051943	5.592707342	5.479691363	5.864163839	5.977871204	5.504937015	5.984096593	5.907727292	5.851742106	5.88885596	5.790932815	5.714548319	5.750914642	5.633531468	5.875439765	5.822824689	5.703412203	5.653046353	5.799902489	5.810421005	6.141016351	4.663655151	4.763173242
10072	6.483530656	6.643262223	6.511944947	6.223967052	6.756483823	6.475271701	6.653008006	6.26857953	6.115505211	6.433824743	6.463836898	6.460102916	6.285148444	6.533583558	6.621622982	6.279824011	6.553125849	6.362796289	6.170369656	6.059593622	6.798383905	6.535432649	6.285343993	6.289675045	5.896082124	6.588487265	6.689395339	6.204958612	6.35109346	6.550835268	6.329953187	6.713715499	6.453199928	6.178785556	6.989996669	6.527855838	6.568677013	6.531189735	6.384800893	6.483691025	6.715505841	6.349178982	6.440068603	6.033131969	6.361040951	6.216649547	6.218403593	7.55203754	7.660893504
10073	7.956740558	7.565629121	7.797977986	7.589348362	7.941771197	7.656612552	7.492223482	7.601937071	7.538370927	7.752931487	7.643238974	7.520321586	7.226367856	7.506042663	7.851700548	7.855418686	7.509271586	7.722573877	7.732347072	7.577590581	7.578028862	7.452881387	7.652082098	7.663543488	7.611939703	7.563476913	7.331259026	7.632714787	7.69464023	7.645903866	7.461869219	7.279417298	7.367563493	7.645527372	7.340733432	7.73481516	7.579105852	7.544992522	7.487445421	7.5883323	7.76117995	7.613023723	7.516983219	7.362631003	7.715286349	7.4421301	7.473831318	9.179308183	8.906505455
10075	6.49436777	6.414414153	6.512716811	6.557736311	6.631687981	6.679477751	6.424013934	6.604628533	6.620989937	6.66418786	6.423023126	6.519970895	6.813954497	6.552683407	6.582446563	6.84208177	6.492689756	6.388832407	6.338313236	6.285396159	6.385314224	6.283911913	6.494479738	6.527496653	6.721460234	6.429429414	6.962526854	6.554712356	6.454046108	6.469021936	6.480396864	6.394993961	6.542417832	6.451206015	6.470891233	6.501545575	6.528514243	6.565736521	6.448716076	6.585237949	6.782314012	6.583559022	6.4892007	6.620430712	6.711639341	6.931653986	6.649105017	6.831429886	6.665781741
10076	5.601541111	5.692322517	5.874088778	5.744693195	5.605881411	5.731619686	5.272408591	5.652595224	5.575394481	5.707365778	5.680346646	5.764290288	5.783185153	5.554245504	5.659303635	6.015659715	5.775218783	5.812528967	5.398079079	5.611665453	5.427202293	5.243856688	5.622455049	5.765860621	5.848236298	5.686488219	5.639717104	5.941000574	5.558377863	5.718405104	5.922200405	5.37439245	5.777923562	5.77335147	5.833823955	5.596265966	5.769676664	6.164639294	5.455768486	5.746209746	5.559986391	5.656947602	5.806617162	5.879898635	6.285394613	6.296461097	6.231576789	5.72013541	5.63957602
10077	6.629799016	6.595455772	6.932529158	7.036956459	6.937091804	6.913734917	6.676077662	6.812817435	6.849716396	7.031658322	6.986377158	6.913627203	7.097020978	6.694516067	7.127629217	7.238150351	6.660958594	6.789301413	6.539108594	6.67736319	6.812609579	6.624390797	6.814047298	6.831199745	7.091596059	6.862561525	6.867589362	7.146603325	7.136246966	7.085465733	6.903149989	6.59832884	6.989479675	7.0671905	7.170654957	6.540634454	6.930619672	6.998385275	6.903748728	7.081413474	6.89805845	7.040427287	7.175004541	7.052334102	7.293623512	7.646141806	7.069917672	6.701982379	6.548901945
10078	6.036627046	6.222664973	6.239532284	6.281242114	6.254760353	6.065425888	6.008224849	5.940498749	5.864486241	6.085460636	6.047519812	5.946272518	6.059238355	5.921549391	6.175423292	6.159452173	5.88788838	5.90657798	6.000513422	5.944965183	6.102692064	6.065138597	6.185254548	6.073885919	6.179830248	5.928963355	6.031267334	6.081753154	5.919557015	5.952864928	5.843994497	6.061298725	6.015541687	6.231665443	6.298646967	5.893280741	6.203261104	6.224983362	5.908007599	6.137282394	6.087792256	5.965894167	5.942349818	6.123304742	6.268507146	6.443500421	6.369086291	7.18569672	7.013018671
10079	6.151330583	5.996788783	5.934352488	6.159270304	5.573038327	6.090562925	7.171122128	6.284234301	6.636349959	5.787994525	5.93221375	6.448245178	6.45906886	6.419291049	6.600392884	6.036969194	5.956756148	6.872904818	6.32539359	6.815819002	6.664684697	6.403769423	6.055121848	6.134774211	6.75179532	7.108843416	6.370475213	6.74095717	6.17017913	6.283664141	6.438048902	6.572333277	5.607315376	6.063199733	6.062340727	5.860381147	6.078249384	6.276903482	5.534969307	5.937489153	6.124387973	6.352098566	5.713318275	6.366067721	6.234380729	5.810172653	6.195378932	10.19020655	9.624616084
1008	3.779139759	3.935302225	3.946017929	3.775038368	4.008224236	4.0304758	3.752545495	4.107665564	3.922640898	3.809773008	3.822052509	3.942415796	3.932956764	3.692417881	4.132944741	4.238798407	3.837548619	3.799240869	3.639923836	3.679655967	3.820133545	3.842394679	3.973462036	3.876380226	4.011518812	3.873554439	4.069831348	4.04091275	3.931538714	3.951994829	3.906515357	3.850926242	4.065851998	3.906633448	4.120215799	3.754224704	4.010502718	4.035275096	3.909523163	4.054664746	3.947181137	3.992301373	3.899406907	4.131491661	4.17545242	4.37478771	4.193582418	5.777917725	6.861081406
10083	8.500409465	8.889338158	8.85492898	8.839461873	9.083223059	8.527360581	8.425673352	8.59457754	8.551266334	8.874514223	8.767081414	8.318174871	8.503613869	9.294237939	8.705049526	8.958897412	9.134729856	8.562145465	8.817454898	7.858300483	8.329695788	8.578149725	9.123371677	8.982123726	8.845408437	8.474073047	8.406035615	7.950796422	8.418517472	9.047523034	8.623592254	8.680947113	8.817863508	9.0449978	8.514895049	8.945315281	8.908251009	8.881802453	8.724694966	8.725699522	8.732008734	8.495066983	9.148894919	8.658242236	8.460977677	8.451859263	8.795486741	6.720668958	7.178329325
10084	7.759426335	7.653713048	7.822425185	7.946836075	8.077648155	7.620447448	8.067721619	7.462204723	7.875753064	7.80498598	7.585547828	7.319956477	7.14239746	7.883702254	7.766140814	7.7601135	7.879286116	7.655519392	7.758870558	7.837959039	7.735932675	7.80003886	7.382025854	7.25759574	7.498716666	7.42817004	7.769931712	7.401409565	7.603746018	7.442045938	7.758057494	7.817859684	7.856308386	7.893035239	7.941551884	8.014505085	7.835297643	7.789384418	7.622863891	7.680203094	8.298914573	7.711838445	7.851098322	7.524582908	7.592868983	7.750143437	7.945733936	8.607912479	8.203040958
10085	4.193932377	4.110568103	4.249238416	3.959587957	4.086888613	4.212109858	4.040774709	4.016444746	4.057554817	4.072776226	3.996320417	3.999696156	4.052966814	3.904952285	4.057390805	4.200713391	3.989594009	4.149065359	3.830641237	4.086967026	3.767703285	3.842832473	4.09531436	4.093001629	4.117419055	4.045618344	3.93331878	4.343158932	3.825852634	3.978186986	4.131423112	4.051327884	3.8804369	4.111113604	4.115560111	4.018857146	4.150150857	4.16815489	3.961073981	4.193579537	4.084834234	4.002385395	4.089283277	4.027689463	4.030319873	4.275564725	4.331688214	5.275628561	5.316151929
10086	6.337952557	6.613271962	6.852137493	6.941386146	6.426173588	6.642042694	6.313926688	6.831323975	6.377014573	6.537995928	6.440000005	6.668582869	7.02582383	6.670931558	6.754977359	6.853924267	6.52573207	6.784089311	6.277490468	6.315206314	6.322818245	6.403022035	6.565860342	6.537181107	6.760505366	6.297240679	6.814540692	6.587967178	6.692980272	6.713263916	6.910661927	6.492234617	7.030171897	6.992308029	7.4735747	6.605730201	6.719723518	6.92614901	6.662631368	7.129336715	6.810488827	6.776597519	6.985552773	6.970773297	7.241455663	7.611728163	7.152096515	6.173079173	6.431552794
10087	6.907831351	7.127704112	6.948209234	6.805454698	7.090620521	6.573046399	6.904063348	6.772341505	7.112445313	6.831182112	6.699652538	6.620258719	6.470385635	6.996926632	6.84315579	6.8537535	7.292014209	6.534725792	6.438165715	6.821003834	6.630478694	6.804689399	6.369015617	7.081152406	6.228259862	6.816968015	6.106838336	5.71360316	6.771754123	6.472563544	6.523596207	6.214869755	6.404067612	6.240230598	5.955498403	6.161285593	6.000032931	5.7793444	6.210432203	6.048296089	6.039915841	6.256166441	6.551581072	6.244171752	5.766144705	5.676352155	6.128791058	6.95975307	6.900323797
10089	4.591641583	4.768045354	5.093492677	4.948268401	4.918043561	4.796071389	4.840661866	4.813429028	4.841236542	4.935637873	4.682971195	4.789604776	4.742438203	4.74389046	4.797896543	5.107410443	4.894172257	4.780772297	4.359927545	4.850019909	4.737320157	4.776054486	4.698204646	4.82012601	4.750430142	4.755743586	4.749569468	4.858660949	4.823296474	4.712531952	4.645904107	4.742055786	4.951937877	4.833172914	5.293088389	4.998017431	4.810836057	5.005610473	4.801810196	5.024701964	4.862752173	4.70790674	4.801799762	4.80595822	5.484750851	5.308307414	5.094749843	5.34905362	5.286602031
1009	5.470189532	6.588846657	5.023372735	5.396069967	6.475721067	5.585243925	7.717312876	5.90964406	6.954865722	6.480812543	5.918583444	5.504168786	6.258043316	5.450085381	5.875315605	5.521505848	6.372167919	6.030144575	5.989612313	7.418745409	6.471975972	5.88793102	5.7724764	5.406494725	5.728263687	6.312000314	5.547327019	5.742774884	6.386656523	5.280117292	5.612384091	5.824454588	5.071897386	5.25389819	5.035411532	5.411343947	5.499525615	5.250095155	5.129640396	5.662961928	5.36372976	5.380918795	5.415792267	5.09156879	5.321833453	5.068877619	5.257264986	6.376633941	7.167942648
10090	4.028953419	4.156172447	4.13077489	4.044723801	4.344639521	4.183080158	4.049877706	4.08424887	4.031375029	4.221099949	4.181529185	4.116988284	4.466501732	4.102316755	4.026967994	4.107771689	4.198406797	4.094843394	4.104215656	4.125009652	4.066701408	4.027325458	4.292540888	4.101998315	4.036358483	3.955130336	4.006258329	4.202426209	4.235650113	4.11491887	3.99149866	3.987651739	4.090035619	4.184433469	4.202981803	4.158278641	4.235427505	4.193800309	4.179741278	4.10398322	4.234659026	4.257733495	4.110724681	4.209692159	4.343705223	4.251708526	4.208306611	4.61447668	4.591294638
10092	9.321588794	9.116300296	9.103940946	8.487180923	9.290040051	9.096977248	10.03290015	9.286241934	9.753343258	9.239702317	9.605072032	9.687537716	9.350321253	8.854473128	9.736595414	8.935991266	9.419536403	9.823054036	9.423641893	9.962159155	10.0208101	10.02938313	9.21769132	8.968731541	9.039247139	9.644452782	9.327960249	9.467070849	9.719237455	9.372221393	8.935730329	9.960765185	9.348836684	9.053670011	9.395947963	8.981303533	9.215092663	8.802951224	9.42247633	9.026375838	9.263986741	8.988770504	9.016475463	9.07444064	8.620552324	8.644681005	8.572632603	12.03436682	12.20666907
10093	7.637092638	7.919256667	7.817817012	7.866441945	7.755602965	7.77658568	7.905170169	7.649143146	7.792174115	7.894339132	7.984861742	7.873430133	7.579433791	7.842862351	7.861048149	7.787403006	7.896854319	7.886659531	7.99591472	7.785302357	7.910303176	7.939342586	7.823740116	7.662205281	7.838291193	7.762997314	7.962873456	8.029369222	8.05105312	7.919655316	7.969503624	8.332911646	7.958935562	7.951836476	8.244302311	7.866084801	7.889119758	7.786042567	7.946103453	7.849237334	8.085090241	7.718842809	7.75124457	7.770562214	7.830780162	7.717465524	7.818180682	8.099936259	8.172557494
10095	7.174792394	7.585185267	7.773635003	7.517068218	8.219593238	7.515455903	9.35364914	7.692657416	8.613720125	7.956615053	8.624954624	7.677638982	7.836029082	7.96658075	8.162888024	7.623162983	7.667867798	8.392417298	8.065188609	8.861203694	8.987984078	8.786251882	7.889707195	7.227302198	7.310094098	8.422931871	8.082468498	7.939455068	8.697606032	8.055267546	7.369548631	8.691017498	7.384278453	7.56172618	8.91207049	6.931367468	7.434896629	7.400037399	7.372670207	7.779156221	8.58742234	6.898238695	7.349058713	7.065665599	7.475085143	7.432036387	7.387197903	10.69291508	11.09340643
10096	9.163187918	9.172228942	9.072262951	9.145192437	9.338011475	9.100820583	9.931181324	9.181182119	9.817795776	9.168917037	9.759372296	9.367433033	9.308092577	9.386831137	9.593782044	8.735401048	9.44354536	9.583136416	9.355459434	9.886998249	9.854656071	9.896992051	9.155940066	9.1064865	9.018144924	9.911365486	9.207581483	9.465059204	9.721417887	9.577113242	8.712570322	9.748917191	9.150085034	8.928266399	9.611930875	8.81706973	9.134862422	8.974468843	9.287537123	9.093775905	9.882786288	8.93820287	9.016512546	9.116188997	8.598426871	8.015582916	8.372400957	11.06920698	11.39524944
10097	8.741286105	8.765994355	8.770825614	8.675519391	8.791666311	8.793414556	9.480864745	8.857053738	9.129379003	8.721376083	8.969924199	9.050721345	8.751183136	8.924097616	8.859200213	8.257120545	9.019470883	9.002949473	9.064751514	9.431075646	9.287896074	9.206731398	8.371370161	8.686032992	8.653310659	9.201967379	8.319449938	8.751646738	9.049353455	8.760970151	8.708458378	9.210280091	8.587137023	8.563219764	8.805735014	8.642024382	8.505061232	8.348046222	8.856405051	8.608052448	8.567562894	8.806789127	8.615766709	8.713564795	8.451992023	8.177395177	8.460071181	10.02350552	10.39039993
10098	5.082397231	5.270342818	5.489960657	5.499642373	5.114475406	5.031913041	5.213171617	5.065312776	5.555924063	5.137354773	5.074680894	5.345727681	5.630823828	5.11318118	5.150732594	5.014866332	5.235383213	4.911474637	4.902957845	5.093933498	5.26614084	4.987949144	5.12814408	5.003639937	5.12452975	5.272840925	5.49785858	5.62950971	5.308491751	5.091279192	4.776030583	5.093969117	4.962793517	5.066878139	5.130506427	4.779881199	4.982379262	4.973906506	4.980180803	4.965815163	4.955768998	5.18078408	4.766643448	5.229624267	5.387260205	5.136991839	4.889982246	8.440848422	8.636729214
10099	9.705466976	9.800457584	9.748523138	9.87805074	9.960989921	9.77362037	10.0087837	9.849326698	10.15025646	9.809095486	10.36360611	9.922181155	9.743640481	10.04717444	9.762710436	9.775984805	9.852012184	9.754895846	10.17967159	9.798270307	9.888800216	10.12702368	9.986079925	9.645187805	9.506655275	10.09584974	9.68440354	9.676276174	9.989693486	9.90267739	9.709223671	10.13769152	9.586607259	9.595751318	9.840700417	10.00658717	9.72274441	9.571084887	9.877269576	9.575945457	9.827991758	9.485821217	9.696788077	9.69109578	9.502502067	9.406795208	9.576954884	11.89443543	11.61291607
101	4.609564202	4.67542066	5.038117212	4.975402738	4.96308827	4.6396701	4.613121911	4.520767472	4.72342177	4.730628458	4.667211244	4.710862151	4.713603541	4.599668756	4.648887482	4.903336105	4.671718608	4.811202458	4.621272107	4.713224129	4.541279741	4.53234895	4.765333489	4.566540886	4.785706275	4.517076508	4.921384779	4.80039468	4.787290683	4.733423458	4.927568507	4.477635811	4.666856286	4.846837347	4.978464279	4.775715235	4.810028951	4.826019397	4.632908192	5.054362604	4.806989596	4.770632062	4.963694517	4.961878175	5.135745884	5.357063554	5.227263729	5.364118813	5.444012898
1010	3.651523434	3.527840044	3.740331154	3.724480263	3.689963458	3.752909307	3.626546907	3.687079887	3.692057186	3.750754571	3.618308383	3.62933038	3.813579742	3.660749073	3.739974823	3.727865244	3.810614964	3.595195377	3.608249045	3.665483917	3.647404873	3.83359279	3.781871303	3.792943065	3.709815718	3.638169118	3.724453504	3.708791592	3.713020687	3.636672478	3.893517841	3.608514549	3.651979991	3.719380103	3.670764496	3.726195599	3.691299996	3.716794018	3.560342914	3.581022487	3.626957918	3.648932836	3.792548239	3.65839755	3.788801701	3.666132024	3.935668642	4.133837515	4.356848536
10100	3.386640329	3.558829748	3.506340109	3.648970832	3.62619687	3.58369089	3.505532335	3.516337096	3.507157344	3.555981876	3.514600816	3.452475436	3.502183781	3.486650683	3.440484639	3.752734858	3.275616177	3.548088755	3.586778327	3.593699261	3.605343769	3.504745811	3.480388266	3.690016958	3.620112334	3.53064905	3.601650969	3.479742526	3.578981951	3.496702049	3.43613291	3.4801361	3.466337186	3.434644298	3.585591422	3.420895911	3.446728418	3.524999549	3.345422741	3.562713262	3.519496128	3.566358112	3.64349227	3.520608853	3.60914565	3.765805041	3.705539842	7.763447302	7.188128282
10101	7.961972041	7.784415888	8.065110446	8.307341744	8.236584597	7.921248867	8.057381883	8.122716479	8.12149967	7.854470799	7.978068353	8.064558276	7.974617573	7.966187351	7.742280161	8.454618883	8.101490789	8.026287437	7.685164477	7.935312517	8.051808996	8.136819053	8.037068493	7.884229424	7.990946392	7.745753813	8.243518475	8.104922527	7.997635287	8.116186616	7.822088255	7.927857909	8.136314676	7.872512479	7.853636669	8.294049968	8.042725039	7.958690141	7.738686122	8.210072256	8.169427367	8.048476873	8.300171973	7.994043134	8.540435295	7.990086974	7.955189067	9.396916154	8.966006
10102	8.486056617	8.437817959	8.47017324	8.540533691	8.267965757	8.400065135	8.163290279	8.21564586	8.080478336	8.482323774	8.579618073	8.771417589	8.184669693	8.703305932	8.466917571	8.706404082	8.419423877	8.178707016	8.501651204	8.066239271	8.181325939	8.05579431	8.11380218	8.227498095	8.024041342	8.081702373	8.301991251	7.967177525	8.180904445	8.376144716	8.39512849	8.427902079	8.32048998	8.562618098	8.41706823	8.580601262	8.439830999	8.513653513	8.644878009	8.516723709	8.546751634	8.314394252	8.521106329	8.367381227	8.161333266	8.301555916	8.24215903	8.56537308	8.282992623
10103	10.97162959	11.36944945	11.55768452	11.82918879	11.63483439	11.60489306	11.93388671	11.61152425	11.80468341	11.73649418	11.91777668	11.45703412	11.33028352	11.50302737	11.48528409	11.429471	11.55988078	11.90175952	11.83738563	11.44893731	12.07983193	12.39568342	10.90798259	10.96447918	11.48704404	11.96988667	11.45268298	10.79657472	11.92744532	12.08466102	11.24637936	12.05895803	11.31390925	11.44935967	12.21730988	11.0370726	11.30559991	10.86422398	11.35355372	11.44636421	12.90557338	10.92071643	11.55079956	11.61069785	11.03488529	11.16391445	11.16316702	7.323008885	9.046057976
10105	7.356672271	7.436812792	7.588237863	7.352697081	7.779795182	7.612207973	7.648438976	7.122619298	7.389139762	7.758904026	8.005906639	7.211364607	7.163998211	7.787721492	7.559764069	7.246842402	7.518786326	7.3191145	7.587134674	7.176825328	7.754295507	7.997199974	7.189273743	7.356634647	7.41639383	7.798156435	7.676737854	7.526382433	7.646464383	7.675881108	7.327835478	7.884193278	7.53837565	7.569719908	7.508641185	7.647969875	7.786893286	7.601435176	7.487275724	7.553849601	7.620382426	7.357681104	7.010885279	7.250321039	6.955478311	6.691617047	6.961024467	7.045402121	7.781165011
10106	7.520712596	7.291813953	7.404048214	7.511436323	7.458847137	7.423298959	7.084136508	7.428434421	7.384155197	7.354077275	7.509898935	7.317892223	7.411807924	7.560535539	7.500391815	7.506372615	7.512246232	7.283580985	7.355932865	7.526445425	7.28221324	7.564784488	7.508314578	7.277415048	7.619940131	7.439406156	7.565778433	7.348291224	7.267681107	7.356622567	7.340130719	7.350046032	7.65367774	7.437520791	7.765292322	7.412995196	7.382265406	7.485643652	7.450127779	7.52029964	7.760313794	7.582733433	7.438458603	7.542660713	7.26443563	7.598270612	7.498128649	8.834135097	8.529724861
10107	5.66239145	5.642669883	5.62567545	5.878971112	5.875726311	5.747112132	5.241594594	5.819566071	5.525466763	5.754662356	5.565321914	5.609450661	5.629014711	5.6765811	5.634528037	6.083654576	5.52179712	5.527452631	5.609019918	5.533380074	5.475107584	5.521706137	5.664904262	5.757678059	5.719982947	5.518399661	5.554441384	5.635769131	5.595775616	5.742592625	5.748753325	5.364787441	5.891057964	5.725783383	5.855173674	5.726458206	5.681062577	5.739407213	5.637403636	5.758193328	5.647872501	5.784983721	5.800700534	5.777745222	5.994732858	5.971738304	5.891726174	5.268193687	5.250770241
10109	9.582931111	9.528529329	9.530945363	9.491204873	9.72548127	9.420028596	10.23860418	9.524395031	10.15080279	9.582809407	10.04654008	9.93006987	9.66018355	9.754645628	9.859723032	9.245196582	9.698634572	9.815356546	9.680164715	10.14976381	10.0835245	10.02232332	9.990941134	9.327577743	9.364953052	10.00100441	9.82677529	9.810319875	9.873404589	9.564749014	9.45947736	10.02031987	9.377322915	9.306257033	9.907058815	9.430097725	9.616867482	9.374608899	9.528136846	9.360331507	9.906053363	9.436725502	9.556060464	9.399262426	9.226907139	9.024812763	9.346569944	11.06610757	11.37528633
10110	7.403800324	8.446059063	7.741104099	7.612445069	7.847465343	7.844246406	6.184020483	7.142963476	7.361793669	7.470055572	7.662255453	6.915330639	7.016837838	7.655150919	7.398104757	7.545341889	7.81884237	7.292905019	8.165158163	7.457219213	7.013241374	7.7800358	7.017273968	7.351308467	7.039013732	7.715477195	7.333108309	7.711835727	7.224030548	6.946840805	7.602384641	7.814885261	7.90926182	7.476457173	8.012105506	7.514243925	8.224401788	7.238888398	7.736834236	7.756758409	7.94941809	7.160382062	7.569361829	7.120633656	6.436905908	7.160466342	6.843876504	5.937043139	6.136975804
10111	5.68706501	5.629893772	5.09145411	5.490037104	5.534838239	5.343626137	5.324103564	5.541869885	5.515495691	5.428885735	5.489541791	5.552106471	5.495317444	5.708770847	5.519743292	5.329504777	5.494505681	5.473048227	5.585346722	5.73555921	5.42603728	5.776992133	5.305919071	5.893434465	5.472828918	5.490194384	5.776238977	5.736000601	5.663231014	5.535054241	6.074615354	5.568650905	5.37672127	5.245959249	5.219859821	5.810571428	5.552837337	5.495966183	5.635161084	5.524461384	5.812391833	5.375944892	5.481967122	5.110480096	5.199051237	5.271520882	5.150331112	6.389053177	6.231401598
10112	4.547332885	4.335658773	4.137968091	4.106127271	4.319155208	4.316358295	4.972411774	4.309474081	4.478560124	4.408601723	4.796069023	4.271074585	4.419394188	4.497934459	4.419172868	4.268168827	4.241567283	4.335845762	4.397362634	4.208059677	4.741997373	4.194767487	4.382064804	4.257948626	4.179957484	4.601663583	4.738481986	4.345935684	4.534992886	4.386029342	3.959082711	4.653331198	4.235369141	4.314752283	4.19970407	4.145876506	4.189368801	4.265216529	4.207357045	4.284794215	4.44952307	4.172457913	4.425281464	4.337405822	4.3077736	4.380523515	4.090623772	4.904318845	5.118884179
10113	7.487906848	7.341899402	7.391612078	7.727525785	7.649049712	7.270319119	7.384488723	7.412170776	7.258657646	7.281722398	7.575690137	7.2643261	7.190547432	7.534461849	7.271847238	7.383888973	7.265782856	6.948807232	7.250899025	7.277430381	7.434642484	7.391978718	7.698411976	7.175213559	7.06539867	7.558745532	7.253104129	7.55270785	7.272954836	7.518813207	7.282142316	7.141374296	7.485553031	7.4295123	7.786396844	7.428968238	7.491160897	7.377318599	7.381186113	7.396406689	7.644635943	7.236965942	7.364765623	7.147048697	7.37254401	6.938413052	7.134248187	8.559674485	8.323726324
10114	4.974266389	5.153873363	5.022243969	5.414446422	5.169130019	5.217099285	4.916591314	5.174330948	5.022040953	4.887030569	5.26448435	4.98684129	5.148736708	5.020578517	4.975409953	4.702005888	5.554476024	5.230693279	5.290340403	4.915248184	4.980435453	5.658061016	4.838441882	4.951972691	5.654593523	5.139772443	5.399083936	5.042822357	5.465381685	5.491752708	5.265966668	5.21102291	6.033937077	5.625784677	5.419984398	5.65843969	5.483786611	5.293995904	5.716053058	5.394659336	5.407480903	5.423299092	5.486544883	5.368346499	5.255893779	5.175715368	5.010108365	5.309455904	5.381341554
10116	4.514425654	4.688540587	4.462885956	4.734283212	4.635274457	4.81534647	4.861130743	4.696127844	4.549270568	4.633139707	4.641340714	4.707465598	4.664345735	4.637103372	4.76262516	4.853416739	4.792802171	4.775453207	4.892966513	4.69130802	4.802267609	5.089677822	4.754158904	4.666710308	4.82386824	4.954909846	4.735160693	4.864685391	5.015157269	4.767556439	4.676933391	4.914427856	4.941526812	5.137650224	5.116936041	4.712998155	4.749379757	4.804857045	5.02428503	4.759001935	4.734563962	5.067162445	5.140478043	4.7971824	4.839684585	4.966964489	4.770484579	5.295407269	5.374850219
1012	5.226369557	4.211018909	4.227047392	3.788054324	4.010562542	4.370047361	4.550405975	4.252002405	4.090406167	4.148453227	4.073742548	4.008386044	4.177896483	4.041264896	4.206155076	4.240595449	3.897466752	3.974405874	4.397535483	4.943556532	4.400006213	3.861669576	4.114611856	3.824415827	4.223584645	4.016470056	4.347536462	4.457433152	4.183608902	4.184061333	4.266584668	3.899585816	4.15723114	4.186648061	4.249406162	4.250649611	4.324470586	4.217402687	4.161095599	4.126691765	3.95272447	4.26030535	4.034181252	4.60982055	4.385409562	4.829343655	4.265204398	9.844520146	8.702772457
10120	7.321233904	7.281150396	7.57419906	7.408052934	7.34587309	7.510327607	7.001734386	7.27419735	7.488299704	7.432683757	7.653141524	7.34618967	7.550667124	7.388087706	7.341876168	7.755257274	7.438964954	7.317690991	7.162818349	6.995526728	7.250651491	7.379150128	7.699646524	7.372574608	7.261452695	7.515328489	7.180815484	7.713720599	7.303139306	7.248130124	7.378126291	7.306645671	7.633514053	7.491669848	7.772017888	7.528244546	7.593037368	7.746157264	7.46154978	7.233030802	7.495208885	7.464089347	7.571735457	7.387061162	7.743210246	7.441626453	7.742088993	9.103802671	8.952502843
10121	6.612839691	6.707305573	6.703434971	6.780015486	6.474268229	6.676306781	7.055165858	6.533400726	6.83752007	6.871043303	7.136638966	6.622498588	6.597584518	6.757758459	6.926194281	6.493245202	6.716914426	6.780098602	6.72728797	6.644407064	6.941745112	6.962938044	6.823698409	6.492289093	6.686002813	7.045766536	7.04243409	6.949880111	6.862526238	6.756704114	6.925445897	7.238691961	6.837139366	6.935038793	7.494333892	6.845834968	6.98518927	6.816685896	6.845496602	7.013285574	7.365827304	6.704119826	6.682962871	6.714098364	6.516736709	6.641237904	6.635542425	8.955386876	8.850222445
10123	5.765555705	5.93317734	5.647336439	5.820758267	6.369800324	5.947910822	8.781673587	5.646921452	6.526852458	5.929473051	6.782853796	6.198281027	6.109492706	6.329324293	6.837464188	5.643767973	6.250574177	6.60740273	6.978292928	6.709705904	7.533823225	6.883798033	6.051464958	5.730467088	5.895771146	6.980345473	5.946009439	5.657337088	6.887355156	5.910928263	5.357708165	6.054565325	6.35662207	5.798441222	5.981654629	5.638375064	6.356121269	6.140259011	5.923150182	6.240535182	6.065833559	5.750758899	5.607933557	7.012626356	5.957663811	5.793407946	5.793029135	6.350322198	6.339262371
10125	6.380059696	5.82429062	6.479264003	6.785436851	5.973755352	6.636784791	7.260083819	5.906395831	6.12323853	6.324897113	6.131206986	6.561027787	5.878643662	5.408189361	5.632044413	5.716929793	6.104144384	5.399795596	7.140685799	6.067831681	7.017029307	7.198309399	6.145034499	6.270047215	6.637035217	5.984107107	6.348235021	6.540207168	6.449122021	6.20440043	5.764879365	6.475885794	5.563145217	6.5382579	6.116522715	5.701227366	6.720146022	5.69456313	5.88511105	6.132086533	5.741932562	5.941047987	5.557293228	5.681725313	5.609065438	5.630704797	5.875335281	4.302441248	4.315587449
10126	7.516866833	7.158637532	7.230097117	7.373668806	7.330246276	7.223788326	7.185961405	7.42780521	7.504836182	7.343715796	7.704420158	7.688474031	7.395391447	7.660913479	7.310304145	7.504626663	7.62947852	7.445119689	7.312799989	7.287475846	7.330258469	7.555622772	7.503207842	7.212815549	7.377463868	7.530107144	7.160696017	7.35186454	7.558670357	7.414084924	7.543477081	7.308088326	6.893154768	7.431770183	7.588094059	7.221769817	7.358565426	7.433577193	7.343834687	7.232432817	7.499481243	7.254957628	7.321981701	7.189434783	7.194488764	7.22535372	7.232383807	7.422648833	7.235819627
10127	6.949663353	6.657558561	6.797877198	6.725335964	6.560957119	6.681894445	6.598112442	6.514698343	6.766733374	6.89122223	6.763711352	7.028483611	6.616970575	6.681148084	6.913057931	6.952222633	6.712240212	7.089965035	6.853530501	6.860247183	6.795206187	6.869839152	6.820279739	6.657534455	6.93196635	6.876573493	6.753678832	6.930170495	6.626893846	6.768884634	6.995471904	6.767445332	6.470365422	6.925910402	6.733640407	6.528496472	6.849056674	6.835947163	6.488187163	6.465933349	6.95438859	6.655301921	6.665934067	6.766152442	6.685299165	6.540087461	6.697392107	9.025101351	8.952502843
10128	9.198184689	9.051618425	8.997104229	8.934573218	8.596498439	8.98916073	8.55478993	8.970196615	8.655048894	9.051660715	8.521141124	8.954767221	8.876129199	8.341809924	8.754879463	8.866375872	9.072248897	8.661527314	9.01457458	8.483331503	8.528837974	8.5641384	8.78094056	9.015141509	8.922195429	8.540020014	8.450107392	8.933513281	8.6827286	8.843654545	9.171305903	8.598191618	8.909366017	8.96822386	8.234795712	8.864146824	9.118363429	9.240188161	9.127765017	8.547142388	8.171306345	9.025464485	9.079896235	8.7927321	8.431770466	8.11702046	8.644895136	9.144346384	9.312592344
10129	4.496117368	4.534562225	4.468501259	4.997570532	4.284785158	4.542065174	4.416669914	4.421472801	4.480676722	4.618795831	4.315847897	4.554885863	4.942141351	4.517321364	4.359948888	4.864652108	4.687621352	4.639450642	4.464027855	4.704185057	4.690200113	4.452737481	4.412225195	4.591209423	4.719026436	4.493728942	5.08957218	4.787378077	4.764196596	4.509140786	4.497436319	4.479461471	4.56109828	4.516800624	4.367855907	4.805409132	4.796860976	4.608000322	4.451859432	4.615008973	4.76561963	4.986299231	4.681028906	4.787997845	4.85958142	4.542832765	4.589225497	8.777166225	8.444947178
1013	4.843690341	4.966895999	5.263270052	5.074950653	5.161523835	4.979307741	4.706132195	4.842325459	4.768460986	5.15679036	4.928588532	4.930422279	5.184719217	4.82246642	4.81537772	5.153251841	4.983924687	5.361582522	4.796358549	4.830218747	4.776949125	4.631421122	5.160096698	4.90652062	4.931649866	4.723385999	4.907897842	4.976423636	4.965461402	4.967891934	5.095705111	4.853520301	5.082397258	5.283094667	5.504382545	5.112407008	5.245979573	5.391051508	5.040456291	5.254887501	5.066947414	5.109429537	5.115428199	5.207236518	5.743391363	5.961912931	6.047206822	5.368378808	5.163148848
10130	9.672102096	9.392736155	9.352660025	9.31093116	9.839329923	9.267619422	9.960596552	9.425985896	9.716216868	9.648503799	9.790808359	9.816737196	9.466579358	9.983370728	9.943866047	8.926775522	9.553960068	9.807445628	9.666873734	9.786742182	9.879140189	9.806718949	9.222395322	9.47241877	9.202252629	9.854216146	9.092017338	9.869922653	9.819585531	9.73159843	9.549741921	9.869991435	9.213516586	8.884221953	9.805518519	9.483045796	9.086280052	9.116488686	9.257423456	9.430623609	10.23045987	9.241450935	9.14843056	9.300961362	8.740059059	8.899161022	8.828577325	11.83244249	11.56601452
10131	9.377335509	9.225871379	9.271765588	9.366002072	9.473097332	9.327221909	8.933652049	9.613488872	9.150669797	9.218526858	9.497558424	9.476643546	8.994116186	9.415198369	8.993808272	9.500005047	9.22437906	8.9552456	9.275793896	8.986188321	9.158314269	9.254062407	9.248434403	9.073802665	9.264371845	9.089412776	9.297295872	9.33164231	9.179136902	9.173334228	9.33929765	9.306134355	9.118248882	9.45600816	9.337521734	9.461681126	9.232233272	9.516569188	9.456118746	9.423765198	9.227093122	9.081583128	9.31026113	9.151194418	9.125966013	9.23958035	9.001410503	9.242735079	9.047471196
10133	8.848369482	8.687375427	8.404816216	8.659008906	7.696709441	8.511249007	7.890242819	8.621093769	8.337106421	8.511721782	8.090525889	7.957601175	8.658478585	8.318508994	7.939766649	8.910256114	8.449683973	8.203348139	8.390671788	8.391614967	8.253653333	8.426232373	8.638092591	8.774893064	8.67304371	8.194066747	8.310288735	8.24233407	8.243582329	8.411185309	8.717167582	8.484022634	8.495764139	8.667275973	7.495191074	8.641719845	8.637712357	8.777134676	8.69389671	8.225520673	8.297411539	8.424709907	8.249358042	8.354855814	8.15718401	7.780478444	8.262418393	10.91482199	10.79980984
10134	10.51148378	10.42343732	10.45142078	10.55950807	10.39798188	10.62099559	10.76799248	10.37974052	10.86359881	10.85189907	10.73777012	10.56062347	10.35914103	10.9997069	10.65029972	9.725182873	10.55479655	10.88429147	10.76995501	10.64441926	10.71425136	10.75628819	10.35116798	10.46159631	10.42865433	11.1000804	10.60855356	10.64351536	10.5075822	10.44234444	10.79308566	10.98190988	10.4260978	10.31807961	10.7143993	10.62292444	10.40430799	10.17207055	10.54795375	10.3279118	10.65409406	10.46735726	10.4719382	10.4571072	10.81624989	10.20976044	10.99399411	13.0411563	12.80917835
10136	4.699977592	4.628539585	4.82097192	4.85543486	4.606308329	4.793021437	4.469239465	4.847356031	4.697253181	4.675198177	4.853808975	4.636587404	4.450606573	4.575530301	4.818622737	4.947943765	4.436306701	4.508026685	4.600874657	4.572531642	4.751220957	4.622621228	4.780664175	4.721237482	4.712644018	4.687062869	4.657251781	4.759119044	4.647859969	4.686092521	4.541660443	4.416936535	4.644710365	4.801503767	4.88212186	4.704998582	4.651289469	4.607680119	4.70484971	4.640332722	4.636503655	4.69469713	4.839682251	4.721277733	5.309200475	4.773421192	4.818230012	4.960118968	5.012339731
10137	6.075469076	5.594137957	5.472613714	5.673981719	5.887124832	5.601258218	6.311467668	5.801560722	5.852267053	5.697941672	5.73731285	5.836837124	5.756084273	5.88668297	5.946633842	5.570380843	5.927786951	5.864122255	6.101816039	5.973845	6.317386192	6.234942118	6.052122336	5.879972279	5.872079756	5.886164035	5.911167696	6.039794799	6.056671684	5.737348132	6.019193351	6.181174247	6.070254722	5.951801503	5.327054191	5.708255588	5.927158385	6.18462597	5.98150264	5.629018179	5.964013291	5.761278102	5.552045227	5.918997566	5.351618472	5.415187193	5.48077572	7.524667765	7.304452123
10138	4.814792688	5.140507746	5.035406857	4.926650707	5.311609227	4.962977829	5.218952703	5.11173847	5.195868701	4.955714391	5.143825022	4.950706621	4.947176489	5.068135596	5.292441801	5.042305631	5.121685618	4.949857822	5.308274708	5.384789716	5.119477743	5.297961995	5.271490238	4.888732004	4.778610344	5.194605526	4.837333725	4.962024133	4.971488853	5.041654033	5.027919295	4.885271252	5.253848638	5.123084635	5.312343693	5.077913607	5.329989618	5.007758573	5.34188595	4.990742859	5.541540512	5.397504299	5.630800843	5.381550087	4.892068077	4.880763843	5.083015741	5.79463756	5.67985392
10139	7.015755417	6.959535847	7.246840865	7.125508087	6.822696666	6.995470856	6.779692575	6.894786174	6.890466845	7.06006464	6.952840105	7.001026282	6.935688265	7.008394329	6.937195083	7.027174798	7.158453072	7.007438488	6.932921974	6.755233071	6.885620817	6.967875921	7.076854055	6.92172578	7.102678576	6.781908324	7.035658071	6.919860129	6.795633213	6.865344621	7.228443333	6.834817011	7.043674365	7.012734358	7.025042786	7.059104832	7.048630156	7.185906774	6.890549374	7.180076525	7.042526776	7.113492991	7.058129337	7.137193615	7.107069418	7.361378825	7.623155741	7.302531986	6.98191565
1014	9.441333593	9.300270709	9.139083028	9.337048912	9.161799902	9.603448753	8.975322281	9.539252465	9.143256607	9.202290772	9.29635553	9.957721595	10.25639258	9.196968208	9.324701915	9.497461098	9.608160636	9.125848558	9.526701699	8.583876789	9.144603879	9.552822435	8.839898697	9.384323811	9.30355774	8.989251972	10.42356928	10.08946409	9.742354887	9.93745423	9.458461783	10.02790671	9.04847831	9.074154694	9.547613625	9.4804523	9.424573497	9.482866207	9.032184963	9.692181113	10.33839075	8.992159109	9.011691802	9.473854493	8.623761938	9.19344291	8.913553009	6.787509464	6.952703276
10140	9.444677258	9.476555207	9.473600569	9.277540622	8.900740871	9.421310891	8.892950827	9.263697855	9.593570383	9.107123693	8.933988302	10.22962421	9.520914044	9.75157187	8.985154878	9.71721562	9.70084199	9.600522503	9.611580909	9.633929525	9.164550433	9.505643822	9.810235971	9.68287121	9.503334086	9.585880123	9.362842935	9.757326859	9.719016534	9.710057255	9.710372082	9.370957178	9.134498139	9.576476408	9.464940956	10.40540472	9.256405491	10.07418688	9.873223682	9.386189553	9.353829089	10.47041574	10.07772873	10.14351524	10.16764175	9.615653662	9.826220109	10.01880391	10.03908698
10141	4.049417829	4.205542645	3.95387515	4.333403694	4.254409828	4.142329194	3.979132972	4.044822484	4.076399437	4.212247175	4.00191192	4.159345346	4.092737168	4.110616978	4.163153563	4.286459712	4.091408393	4.17915849	4.030359735	3.963638469	4.369920999	3.869947585	4.149114581	4.0986432	4.064189491	4.206177037	3.909483094	4.116753582	3.885139633	4.209399727	3.738698047	3.965813796	4.009810007	4.200947063	4.248867665	4.151874502	3.952610213	4.175378914	4.039574647	4.103815164	3.893302116	4.128964093	4.109478021	4.008185299	4.020057419	4.109435967	4.35035756	4.67772045	4.699117219
10142	4.768964796	4.705783899	4.536429843	4.714752254	4.688646228	4.652749929	4.596694216	4.806766332	4.503537797	4.546441515	4.628570232	4.588131516	4.708962104	4.661438873	4.46502944	4.70598451	4.595531119	4.516036396	4.682188735	4.614225625	4.476191773	4.601089284	4.582848921	4.84274642	4.734269741	4.67176363	4.727050096	5.096923502	4.559068232	4.677913497	4.765413132	4.627514258	4.571048881	4.53786138	4.448780133	4.74910203	4.674682342	4.765583034	4.517271751	4.382291927	4.464583587	4.555887715	4.537815793	4.56101096	4.628289665	4.473149147	4.474718757	5.760958877	5.583747932
10144	8.938034539	8.200297028	8.20453262	8.318377219	8.085958349	8.27795501	7.960661333	8.28929801	7.972171191	8.071911027	7.633427862	8.10541445	7.474198044	8.034681434	7.70589322	8.074791893	7.837592486	7.536552412	8.375560666	8.054724686	8.078102432	8.450233251	8.232802612	8.42970023	8.203502259	7.971672574	7.889654484	8.826034945	7.830859381	8.122692002	8.713258538	8.181230818	7.748682595	8.181757695	7.121981865	8.333039615	8.131340396	7.900138233	8.287216919	7.87124074	7.742776122	8.031424957	8.170770948	7.719618757	7.186566294	7.009030197	7.361997652	7.571332965	7.775898346
10146	7.879557359	7.902914444	7.896038498	7.76841749	7.86479922	7.746722132	7.77671446	7.841012203	8.062621697	7.763992332	7.904486794	7.838451984	7.83073484	8.02330322	7.927877518	7.446855094	8.026985864	7.959894657	8.032793083	7.886909259	8.060058835	8.105966104	7.787457433	7.884055983	8.04095536	8.032543338	7.91464547	8.107056289	7.871798141	8.033466075	7.864482794	8.220355312	7.87935718	7.971453585	7.65384511	7.94168088	7.725627518	7.733962989	7.818253938	7.767008373	7.999291364	7.873311404	7.869358679	7.842200641	7.621243108	7.396881172	7.761492391	8.859722297	9.314733323
10147	5.671921944	5.644629417	5.707932472	5.676774504	5.712630555	5.722738979	5.566746081	5.722553928	5.661245964	5.751878757	5.825985527	5.718257327	5.817822146	5.631735332	5.767850294	5.835196509	5.718628398	5.640480139	5.621129903	5.540336183	5.546248517	5.679194066	5.914452774	5.719033809	5.614540921	5.694306538	5.782405744	5.810514869	5.687048338	5.663632241	5.825960873	5.686741794	5.659005546	5.755953465	5.799719375	5.649001931	5.705070297	5.826395714	5.614969963	5.868540275	5.892351186	5.707625998	5.703730262	5.768076311	5.832218871	5.888204213	5.888222826	6.729967702	6.486220589
10148	4.450544299	4.366630364	4.458642987	4.800587218	4.809535946	4.541664056	4.775685626	4.446308477	4.529872639	4.529380481	4.540385488	4.425472408	4.743281423	4.328650349	4.400621855	4.566436058	4.624978738	4.874901849	4.248740087	4.681824486	4.775688996	4.266436889	4.523924557	4.484409279	4.649635759	4.453121554	4.454760169	4.437067998	4.406067291	4.419030068	4.712726287	4.347857944	4.461914096	4.661427164	4.566497836	4.467078072	4.540260891	4.803948193	4.326154908	4.594389361	4.567780583	4.45410534	4.335297239	4.369361143	4.844501381	4.893348244	5.056528257	5.486076087	5.511742108
10149	4.069439777	4.34513785	4.013598429	4.077237635	4.153304455	4.170788128	4.343223061	4.18484152	4.253455517	4.034995379	4.19515197	4.091862512	4.041987226	4.22909606	4.154427324	4.197583461	4.013728183	4.249917904	4.128221588	4.228087469	4.204169803	4.045077186	4.080683246	4.234369618	4.347810849	3.944669882	4.310366764	3.979900813	4.246722114	4.212786342	3.952354418	3.877456873	4.081183838	4.155869356	4.433713358	3.985007564	4.135288221	4.049695742	4.069390744	4.163015816	4.565946212	4.10578592	4.220186332	4.089384284	4.577273905	4.335146197	4.277928322	4.490757291	4.439993678
1015	4.714538788	4.887408215	4.823574551	5.12538901	4.777593631	5.061818875	4.460831115	4.83531503	4.557858228	4.827646791	4.715832141	4.706371275	4.804455161	4.80205355	4.979116421	5.045054837	4.651744661	4.919686157	4.746509664	4.751432506	4.756484015	4.659533318	4.886406586	4.870802464	5.034772206	4.860212118	4.860359603	4.841450077	4.834504857	4.806206599	4.695250026	4.642322155	4.926903947	5.056439518	5.18779983	4.761815079	4.738164311	4.968209136	4.818282141	4.825393127	4.594399866	5.048690097	4.967601721	4.880164062	4.99787671	4.957464807	5.219407689	5.511898415	5.781651984
10150	7.309029886	6.915265644	6.914399094	6.744780418	6.319194977	7.065423857	7.093308163	6.850517971	6.786004616	6.871836678	6.677745054	6.649265918	6.84069625	6.789203316	6.496006465	6.741290502	7.036298709	6.987013595	7.281030373	7.207441331	7.065266971	7.384117191	6.579354423	6.709034407	7.044506176	6.995933257	6.977674547	7.254271148	7.361896265	7.066445361	7.686267663	7.207738577	7.422372455	7.250709267	6.685703621	7.191664571	6.868326978	7.18670448	7.330456644	6.611151212	7.041916764	7.206817588	7.134401189	7.043935456	6.914395974	6.968123227	6.910146793	6.956377043	7.102391488
10151	3.77155791	3.936720004	3.662118565	3.786675149	3.990176999	3.845759445	3.835052641	3.831429541	3.69912679	3.846542918	3.762231768	3.706158563	3.75254437	3.818519124	3.77303263	3.887005045	3.74036622	3.690573322	3.779284105	3.861979147	3.678751597	3.692572788	3.665792805	3.696931043	3.78914686	3.92140122	3.736872573	3.6747741	3.636944094	3.764263813	3.753938946	3.697680944	3.800089143	3.63941702	3.783873883	3.828153668	3.706941237	3.832192095	3.634148395	3.713950235	3.683632841	3.677248142	3.780691766	3.865113305	3.6891699	4.023829887	3.82763421	4.564219458	4.392116375
10152	7.428921872	7.346569302	7.253774734	7.394967944	7.216190295	7.401667023	7.163993598	7.477300446	7.43258936	7.441740758	7.507811378	7.344178972	7.413217253	7.379691757	7.514778208	7.552232659	7.344791983	7.397357773	7.243227388	7.25041518	7.417818811	7.323168226	7.477699206	7.432526094	7.565069656	7.524304174	7.290228035	7.347440769	7.425726253	7.51999765	7.248430046	7.282692324	7.487485593	7.512846926	7.828221975	7.278151185	7.391853212	7.413939248	7.452584686	7.428097705	7.567619239	7.605919586	7.574723542	7.381938459	7.722586473	7.678782771	7.719866826	7.611019203	7.694369833
10153	8.6285814	8.460485792	8.696273271	8.975795574	9.095645662	8.346517977	9.072244723	8.716056974	8.925521799	8.715066787	9.003699507	8.691507359	8.570262638	8.835367023	8.686836617	8.4179341	8.712242219	8.353269408	8.672922566	8.816302686	8.578483671	8.8037642	8.810554116	8.534557827	8.554291023	8.652567646	8.796658748	8.727520165	8.505529247	8.699173102	8.873387761	8.711940496	8.463750507	8.722310017	8.381588193	8.529475267	8.663507076	8.575635244	8.399049951	8.349514719	8.346485543	8.413123965	8.349000213	8.41938397	8.267082419	8.053468068	8.361580616	8.540258519	9.19165164
10154	4.362899978	4.444721776	4.437870301	4.561921233	4.434462305	4.469929315	4.684820193	4.429285583	4.548807604	4.553210374	4.54362432	4.342616494	4.347515307	4.461788718	4.322641766	4.41324368	4.487665803	4.48617919	4.522100705	4.539496275	4.511440156	4.476439302	4.387230939	4.477920283	4.551825183	4.626797138	4.391939877	4.2373427	4.428356338	4.439176326	4.424397945	4.438385647	4.660505589	4.400652277	4.351355004	4.370938762	4.525507553	4.434698707	4.469387247	4.470385164	4.273541806	4.390446339	4.431220195	4.430009971	4.42177019	4.598290604	4.668536148	4.995763176	5.067218757
10155	6.623915602	6.544876882	6.371423576	6.636634184	6.528157284	6.790674991	6.87272906	6.738147047	6.577454852	6.877681648	6.683188908	6.789453073	6.842999954	6.67781158	6.942232636	6.706374571	6.846603506	6.527572571	6.567703989	6.586460371	6.763168147	6.682914211	6.740691597	6.547315611	6.639226843	6.580175551	6.55429037	6.616860438	6.622885736	6.565248457	6.765247764	6.682457331	6.670344839	6.7788757	6.756867867	6.675486405	6.597139104	6.642998295	6.663015887	6.769313107	6.761606102	6.521387496	6.793667654	6.543350297	6.544938074	6.778784418	6.556698641	7.78265553	7.717099936
10157	5.776628036	6.029190229	6.261024182	6.0569182	5.669859313	5.623484652	5.475167007	5.961938256	5.54358659	6.34313166	5.768303078	5.751894876	6.381834498	6.11802421	5.513725686	6.00728103	6.088519726	5.031539247	6.53928574	5.443767321	5.200472927	6.080809191	6.278583636	6.112142252	6.052259148	5.719927955	6.259163795	5.898347001	5.607313353	6.03471341	5.854760038	5.836447153	6.289033231	6.610424714	6.348069876	6.233772661	5.926560698	6.389825635	6.150727681	6.219271714	6.083744349	7.042616945	6.524306154	6.712550401	6.936510104	6.762376043	7.12777139	6.281015638	6.421078463
10158	12.5944182	12.8375606	12.90182893	12.79906239	12.46355913	12.82226211	12.05118265	12.73336783	12.64559165	12.71132699	12.9867249	12.58805755	12.91820746	12.85576811	12.46916803	12.72954738	12.87966731	12.37782911	12.88635121	12.33510919	12.42303416	12.94438142	12.77160523	12.62311306	12.71731196	12.68578227	12.8895442	12.10983618	12.62976164	12.66886781	12.81843093	12.57971651	12.93149683	12.87280962	13.03846972	12.86453552	12.84544309	12.86194834	12.85901662	12.82313527	12.68459065	12.7294887	12.88658173	12.75832595	12.77177683	12.81546904	12.70658066	11.61652231	11.578839
10159	10.2984926	10.45751063	10.29644436	10.16715577	9.837477102	10.40374222	10.20598481	10.07083733	10.43959513	10.0355532	9.776949075	10.24148868	10.67041576	10.44979033	10.28466129	9.787617267	10.31590261	10.34129105	10.36541613	10.25241406	10.23409637	10.26655691	9.798106681	10.29765711	10.26787816	10.34309779	10.22530329	9.994127074	10.25667698	10.04690659	9.986143864	10.14682209	10.02638354	10.09972657	9.527196671	10.32005969	10.11272314	10.20377221	10.18346247	10.00403122	10.0739488	10.4785892	10.07868718	10.39160521	9.921667437	9.928364057	9.707364419	11.10395183	11.08675037
1016	4.855795172	4.711432358	5.046349301	4.816359789	4.80921941	4.982322605	4.658348023	4.968070073	4.721135713	4.774184214	4.826942862	4.885859021	5.030998153	4.807940625	4.828408448	5.240371646	4.633404868	4.900474543	4.73548683	4.528622915	4.535674252	4.520986321	4.707634986	4.884104648	4.9549598	4.752715334	4.976249048	4.815203302	4.785377095	4.785312009	5.133543545	4.686989666	4.996757004	4.89257306	5.109922669	4.818920992	4.735734147	5.041868482	4.866372203	4.905456214	5.099491106	5.109283548	4.882652316	4.959912435	5.408612408	5.301416348	4.9473454	5.194169326	5.478688667
10160	8.170509021	7.801544214	7.649062897	7.9180915	7.949003834	7.831199764	8.30202715	8.211836619	7.833060686	7.883522524	8.304357117	8.129661711	7.871356187	8.117753111	8.176305222	7.82257846	7.949916975	8.069049608	7.950054643	7.661257608	8.308188222	8.409114994	7.857527994	7.850872017	7.767654943	7.690779681	8.487704064	7.978425356	7.953423532	8.065497519	8.166783587	8.712610795	7.626661949	7.578315422	7.46722827	7.719570052	7.628192966	7.779528826	7.746288041	7.736583883	8.44197942	7.500867923	7.635883374	7.656094717	7.250126007	7.304954418	7.404353123	8.303494754	8.290413709
10161	6.594924213	7.560556319	7.200508233	7.517068218	7.67900069	7.175002127	7.603587123	6.917650274	7.644158156	7.70136024	7.398117609	6.718928197	7.220187306	7.605800784	7.452528662	7.119827225	7.410948453	7.201682706	7.579551574	7.844862355	7.333604527	7.810439132	7.699646524	6.922148737	7.367530102	7.363191203	7.215304144	6.889629651	7.372005649	7.161374129	6.820614511	7.39910958	6.638906065	7.189928211	7.265600948	7.281547389	6.815816669	6.956790007	6.852970096	7.033130406	7.516718777	6.900545532	7.173649365	6.684448521	6.554341004	6.852537808	6.731677785	10.42247464	10.89949454
10162	6.713058873	6.726086196	6.40280464	6.553958125	6.580361627	6.150179745	6.572323589	6.475050925	6.454445873	6.558750488	6.663765123	6.006976506	6.278408638	6.566937617	6.592179181	5.879745457	6.7335268	5.977359022	6.85149535	6.198681073	6.384753835	6.612204698	6.163214391	6.349300649	5.913312954	6.601527777	7.063413796	6.296558041	6.238494109	6.202414054	6.57407717	6.903557347	5.919422378	5.935937748	6.383004415	6.117764854	6.256623567	6.077576932	6.281430718	6.127766271	7.084504135	5.902852251	6.106714741	5.633525938	6.602014965	6.114105607	6.485307506	6.387915344	6.526000853
10164	5.023043306	5.101746912	5.019635797	4.975176144	5.006602864	5.344302321	4.869449387	5.344742539	5.091805329	5.211484735	4.986034082	5.020462399	5.325390926	5.108511719	5.382548515	5.252386561	5.004730794	5.265761462	4.810995598	5.086375359	5.136709867	4.898487785	4.891889352	5.196649598	5.345241235	5.125547159	4.895598237	5.263233694	5.25164535	5.092317516	5.276577862	4.863812724	5.144858141	5.51420384	5.596002876	5.074615929	5.098348662	5.050310271	5.030672573	5.35522709	5.225149798	5.352044307	5.430096255	5.199033162	5.539805638	5.507516581	5.577932801	5.84563314	5.849683687
10165	7.84626082	7.727129356	7.345419726	7.129616758	7.670766918	7.387936142	6.782868889	7.268958082	7.37282049	7.291394044	7.136093931	7.715109091	7.105390573	7.453511291	7.139895812	7.282094246	7.400444523	7.034031695	7.636172324	6.704106683	6.988535105	7.281799467	7.751546465	7.594646985	7.042456841	7.663466031	7.28505321	7.00796879	7.201453133	7.195668244	7.355522902	7.212921115	7.390953018	7.354607777	6.680726293	7.719554498	7.576542898	7.488186177	7.677547781	7.224119935	6.570007928	7.365026853	7.521930057	7.53471562	6.953662086	6.848973803	6.947339615	7.361528275	7.373582944
10168	4.300565771	4.406608615	4.23665299	3.965483084	4.303889793	4.163413675	4.32110776	4.238290645	4.066153305	4.404671931	4.391965372	4.299680824	4.300613779	4.378085181	4.228278589	4.279665906	4.217811194	4.423084361	4.16679054	4.347282434	4.35624658	4.239538358	4.471435439	4.309569115	4.275159933	4.368030591	4.375485608	4.078225843	4.154904021	4.208271974	4.305908527	4.136437899	4.150916672	4.362743525	4.319749034	4.116954324	4.264552339	4.281970833	4.153222347	4.358371097	4.254863958	4.385278844	4.378348879	4.129010699	4.290117276	4.318123678	4.269674597	5.464610968	5.307727293
10169	11.09633017	10.98317979	11.08293175	11.06660932	10.88251549	11.07598116	11.14572626	11.06344529	11.21772269	11.13257864	11.34375796	11.11788763	10.99949402	11.14095431	11.07141801	11.09577626	11.19495652	11.16241702	10.99875027	11.08443556	11.15879548	11.16603845	11.14920698	10.81844714	10.92770467	11.22344105	10.71941418	11.23138573	11.0316285	10.91393873	11.11079191	11.07435779	10.95075249	10.91723005	11.01741964	10.93946352	10.93790882	10.96646751	10.90136551	10.84654884	11.26335355	10.92276011	10.83077833	10.99684791	11.23845283	11.03776695	11.07183229	8.724809766	8.780558148
1017	5.751259722	5.860616163	5.949643267	5.788357245	5.828821352	6.025432823	6.101280125	5.850460662	6.020136994	5.768356101	6.054956914	5.921646121	5.955969408	6.124055706	5.978807573	6.132398281	5.84837361	5.972032135	5.784963696	5.702155732	6.049001467	6.13706342	5.883260052	5.746458651	5.888762425	6.047637307	5.783578436	5.955114531	5.883704003	5.882113235	6.002604964	6.06102709	6.070853747	6.077172248	6.191494259	5.680306911	6.068107964	6.092494367	6.062824778	6.107937971	6.060793056	5.876800459	6.044559275	6.104072987	6.033506685	5.871012361	6.056440243	7.310194178	7.441414645
10170	5.49483432	5.581765215	5.891880452	5.72203156	6.016245257	5.740010013	5.708079277	5.728720711	5.76225482	5.824398829	5.638223856	5.396667863	5.724230955	5.774573554	5.681235896	5.649900308	5.426709829	5.731271762	5.612073827	5.829972419	5.937479011	5.637678317	5.460282813	5.677073597	5.767177942	5.696372968	5.567475597	5.729021419	5.685248883	5.731169973	5.397435318	5.795755546	5.586418593	5.660072255	5.68173752	5.595979225	5.662779273	5.580476419	5.560709917	5.932323078	5.576823547	5.715054685	5.681398989	5.68893721	5.942637317	5.884130423	5.749932145	6.383348711	6.85717574
10171	7.387695232	7.195454654	7.063706586	7.507450453	7.100967766	7.253431122	6.95039867	7.304665548	7.398056198	7.324668724	7.029078949	7.256094601	7.255944022	7.398127444	7.234475901	7.61830783	7.153681991	6.919627709	7.066557768	7.151458992	7.105672343	6.849334913	7.232928479	7.30806612	7.50718387	6.968988257	7.416375135	7.436987155	7.161859097	6.984650546	7.577594109	7.224533176	7.276068219	7.236124959	7.226126365	7.365588551	7.207568851	7.047777145	7.320428925	7.243211138	7.103762428	7.701419889	7.371716182	7.593468995	7.409450845	7.320818651	7.442835678	8.503156432	8.157083348
10174	5.908378979	5.869989988	6.042775172	6.028106046	5.915347921	5.932151279	5.802969539	5.946700842	5.816953775	6.141675147	6.014012277	5.889338112	6.074434624	5.777388241	5.986123618	6.252075487	5.999413731	5.925696822	5.838132431	5.806339619	5.731350013	5.726450387	6.142785504	5.985523965	6.183810538	5.760278219	5.984038065	5.947208491	5.969666615	5.907461733	6.091398918	5.84584258	6.1505774	6.213484714	6.245244262	5.939924769	5.999702467	6.263435665	5.903259131	6.319220875	6.162565016	6.096845491	6.054036848	6.185780654	6.485354318	6.207146831	6.656318712	6.063403591	6.107259965
10175	9.120082873	8.999531438	8.761187297	8.236508497	8.768051854	8.983098596	9.177863019	9.023964279	9.072173543	8.761274277	8.43453753	9.14723484	8.917610559	9.152838525	9.163877754	8.590736834	8.957901472	8.905827162	9.175954904	8.974507721	9.036511459	9.043746213	8.874789135	8.831526124	8.597676054	9.023950549	8.356088186	8.528486432	8.932369767	8.648820612	8.795866568	9.117078041	8.960928229	8.85343675	8.653255685	9.074645926	8.902203706	8.456793866	9.092835472	8.576317562	8.822781919	8.91589981	8.992532363	8.759429192	8.469836398	8.305099141	8.31467501	10.08266825	10.29152235
10179	7.522501325	7.588073727	7.447801042	7.279257227	7.369548613	7.334495723	7.89486409	7.553125841	7.918788162	7.399917482	7.6985765	7.442101126	7.461014167	7.597814564	7.558944343	7.127471628	7.810374295	7.193678615	7.71014876	7.791845627	7.783299362	7.924410438	7.423045095	7.280504961	7.58937153	7.672866779	7.363420991	7.308898289	7.618055488	7.67424918	7.353815062	8.136816267	7.424844688	7.413919774	7.117046817	7.237411929	7.183342094	7.365494855	7.735271952	7.033398491	7.093921551	7.091359328	7.185693015	7.032869525	6.617442595	6.574865651	6.575413726	8.662519703	8.691467917
1018	5.381339483	5.23126631	5.694435565	5.334301288	5.508908585	5.515801676	5.384234625	5.627035045	5.534577649	5.534709504	5.744887059	5.468191771	5.621915054	5.503652946	5.367699057	5.878454051	5.290926629	5.36584029	5.249969391	5.365009883	5.430126216	5.152772417	5.577634244	5.406082107	5.517251943	5.415750623	5.261809824	5.809323698	5.314812312	5.476266464	5.383366935	5.175789263	5.386365145	5.667937905	5.963462596	5.380730863	5.45162627	5.747584814	5.457674161	5.364093465	5.487666022	5.582333322	5.746228578	5.596797716	6.108415305	5.90570505	6.005996814	6.196122086	5.912690383
10180	6.143207006	5.80740251	5.977119322	5.96838325	6.371069391	5.723735699	5.788259319	5.763781554	5.725731313	5.550917612	5.900316154	5.640452648	5.671684894	5.856092602	5.67253641	5.542844895	5.955477163	5.735740777	5.743323383	5.913583956	5.542828503	5.754145893	6.440556294	5.528198343	5.599112829	5.594151503	5.855511015	5.639483002	5.669556916	5.635528576	5.637999867	5.538860711	5.634014946	5.617864984	5.479481149	6.065275878	5.993240796	5.866037271	5.659197642	5.693262942	5.404995911	5.844692053	5.513332355	5.810143972	5.789241612	5.365556867	5.727155959	8.378530962	8.057486736
10181	7.457584799	7.389506511	7.302288531	7.506557941	7.634311263	7.255520084	7.660525348	7.3048044	7.60845255	7.25092878	7.919880445	7.282169826	7.536659878	7.390655808	7.590639316	7.297476537	7.556354084	7.379532082	7.282203999	7.595945482	7.56040767	7.69505182	7.489677346	7.373787043	7.62606761	7.62492477	7.565413608	7.937950976	7.53044448	7.541420428	7.381484102	7.531619417	7.140433356	7.237679562	7.401102827	7.144884924	7.322788121	7.180581378	7.223840935	6.993263909	7.294748177	7.090230143	6.84630439	7.04075832	6.781277137	6.142145038	7.001453806	10.47802264	10.12063094
10184	5.99523349	6.264768164	5.965299439	5.845120518	6.248405706	5.852627961	6.777284414	6.341771076	6.597670428	6.491675005	6.473579487	6.184912117	6.578154276	6.126071825	6.427038366	6.258949169	6.006910828	6.327361404	6.074891299	6.260951235	6.416639468	6.237078188	6.09737282	6.052729898	5.975931001	6.207891193	6.59575686	6.738333144	6.282674369	6.19992741	5.763559789	7.138096972	6.085302889	6.107056483	6.584669804	6.003771279	6.037636018	6.008750165	6.1383412	6.117762847	6.435099455	6.101347752	6.068045978	6.191885382	6.428383501	6.641180617	6.429400575	7.478186748	8.790349153
10186	5.774389685	5.820941514	5.744063014	5.916851269	5.834892376	5.683858186	7.532532553	5.973356984	6.707701704	6.334276156	6.039804212	5.704215244	5.979281358	5.579187722	5.917874882	6.002135316	6.124815437	7.291578875	7.193398259	7.883066994	7.340726762	5.86562401	6.771313461	5.192007963	5.48758172	7.178098595	5.885565156	6.227714267	6.523840127	5.671869371	5.449490102	5.864795633	5.158921869	5.190679174	5.345352441	5.58931257	5.984712758	5.309790544	5.376885356	5.78187199	6.055572275	5.328913803	5.483155921	5.131926768	5.384271017	5.002240332	5.561238226	10.82680266	10.27872378
10188	5.23924166	5.510971011	5.977142768	5.544593691	5.486247803	5.478072788	5.198209062	5.354417351	5.280363641	5.643781897	5.171763178	5.359784064	5.597804069	5.486767239	5.605612877	5.668762764	5.304595136	5.418826308	5.173451155	5.458001404	5.188370967	5.344402906	5.294049315	5.543973806	5.478079664	5.315739144	5.784365372	5.330281978	5.371514816	5.212309765	5.391200215	5.412545367	5.577832615	5.6391362	5.63312356	5.446079141	5.648023418	5.670400474	5.462073755	5.600221102	5.416802286	5.449194188	5.564232689	5.5642844	5.737894169	5.954324669	5.569309445	5.936984748	6.033961477
1019	8.554789058	8.595408836	8.501726195	8.378684926	8.994678159	8.640637799	8.521839552	8.526421238	8.610727748	8.761748453	8.596574138	8.639732389	8.328991116	8.904662795	8.798200025	8.604764414	8.64805239	8.547469994	8.345699808	8.423908698	8.295691634	8.483646264	8.559352611	8.298677029	8.28511275	8.411280906	8.201484234	8.440261271	8.482660744	8.227104881	8.400227101	8.811445162	8.518043706	8.361167998	8.202387745	8.589770633	8.513438417	8.253370613	8.482260584	8.533706528	8.118652903	8.290332185	8.135474683	8.103628033	8.07926757	7.909812994	8.077576613	9.456382098	9.363606561
10190	8.311886156	8.338511303	7.776366459	7.864241875	8.20433971	7.628992052	8.635798682	8.001761814	8.341391098	8.100582766	8.513368583	8.30409443	7.815902088	8.474572609	8.524466435	7.586207174	8.122651246	8.421686621	8.255816826	8.408679163	8.615384987	8.261820082	8.658085439	7.907912775	7.674462949	8.426747778	8.054641031	8.299252938	8.072211142	8.024229713	8.048464546	8.571835417	7.991439414	7.889973273	8.108419019	7.898647916	7.901008811	7.960324286	8.224883983	7.963417581	8.729814841	7.893386784	7.799877257	7.733192192	7.280293273	6.740344247	6.990638855	9.756819917	9.75554201
10193	6.159148001	6.155542828	5.812383763	5.988757772	6.060190702	6.311132771	5.961835656	5.997840382	5.990856241	6.046075065	6.02282957	6.069337541	5.752592782	5.859959705	6.013352218	5.927772259	6.145499455	5.942755523	6.0871146	5.768293703	5.973322313	6.104160025	6.126201078	5.894051157	6.139125527	5.801794999	6.072159647	5.994796526	6.098280065	6.025201213	6.398708038	6.117615117	6.087112845	6.318085876	6.115341547	6.235734022	6.163455609	6.108004307	6.356342838	6.079190374	6.006824695	6.022283396	6.079183417	5.887506557	5.960299466	6.003419256	5.972443858	6.986754927	6.978628874
10195	6.926601118	7.109133883	7.085885463	7.1610219	6.940873014	7.358070582	7.108704761	7.25191862	7.309404547	7.284797093	7.47779896	7.404438835	7.007825368	7.419563118	7.084094464	7.381136583	7.169344753	7.380869479	7.070405013	6.871153097	7.323568336	7.074371583	7.098665344	7.098045328	6.991511652	7.127280735	7.079121938	7.434818588	7.071355013	7.126602117	7.478820297	7.222920623	7.28697727	7.244062874	7.727840919	7.183490008	7.280914274	7.17637986	7.107808214	7.259993874	7.642683605	7.120429374	7.267139135	7.160642995	7.50724986	7.716551854	7.563399456	8.231996642	8.154042973
10196	4.843854941	4.936899445	4.658666092	4.533934403	4.67577558	4.882846253	4.8660552	4.859778907	4.835389775	4.744088414	4.839488288	4.835945105	4.732949155	4.904754043	4.64828618	4.809947091	4.797565952	4.842466825	4.880637557	4.956847066	4.834927522	4.753345868	4.901673568	4.9732875	4.883423659	5.136341664	4.700597808	4.733546121	4.751705524	4.811455754	4.882369063	4.800983433	4.781200415	4.607834226	4.465976605	4.85917285	4.806848078	4.851464723	4.894412485	5.12427132	4.947039581	4.989865682	5.175280859	4.867813912	4.844099755	4.935322904	4.961799409	6.525943291	6.47058338
10197	6.328459108	6.502583698	6.355811698	6.218123682	6.3775333	6.567553816	6.745516361	6.375949385	6.420796628	6.545636455	6.820870436	6.614235839	6.382067594	6.62398479	6.633382738	6.371972964	6.683642536	6.510381247	6.47182652	6.329379884	6.685091531	6.931445512	6.476808256	6.282355539	6.376123797	6.689762443	6.558565618	6.684268678	6.64687843	6.66094844	6.625347258	7.160171401	6.787119943	6.706537303	7.186689626	6.633008206	6.610597016	6.605638938	6.767239088	6.699425923	7.005248078	6.703766664	6.663484776	6.523688593	6.275094235	6.380815589	6.437229125	7.854415581	7.726232019
10198	4.713419207	4.60929191	4.548545112	4.312518534	4.701010135	4.678090099	4.603129143	4.7339403	4.827912904	4.724293134	4.95625478	4.660436976	4.734798862	4.911813109	4.558069449	4.626475431	4.903656797	4.805544497	4.802089986	4.62562225	4.896209367	4.748061027	4.954916359	4.808340255	4.751180826	5.19069751	4.602155687	4.712538248	4.874431954	4.582164376	5.048279425	4.752754149	4.950867179	4.869901957	4.640445113	4.853433814	4.637964064	4.926458909	5.002815872	4.531631205	5.449337012	4.78898736	4.746260136	4.605084024	4.844521774	4.804874896	4.660676871	4.786716952	4.926199349
10199	7.197011762	7.251783155	7.554997523	7.525877907	7.823206339	7.472551155	7.74878295	7.35131459	7.568417344	7.309965894	7.535337243	7.493911778	7.182287316	7.508775328	7.478871239	7.351190178	7.29700329	6.999151372	7.259467765	7.241510644	7.345061654	7.517655563	7.5234671	7.281378268	7.125179629	7.17940705	7.215605559	7.184342952	7.238108597	7.165048844	7.24158708	7.219650651	7.221289193	6.93872854	7.088601907	7.284169268	7.16755622	7.218021449	7.174428108	7.00740697	7.056255418	7.259662765	6.877115674	7.146043531	6.814846981	6.824769447	6.88866317	8.612377594	8.708362826
102	6.147049922	5.994769384	5.795567704	5.776909772	5.715009397	6.088857219	7.072364851	6.170482141	6.749517408	6.04849856	6.12852314	6.292902687	6.107408421	6.178885604	6.198453525	5.398175076	6.598025362	6.529814015	6.876025119	6.849179118	6.996245153	7.11990793	5.75667988	6.268491464	6.414686947	6.915645758	6.781879023	6.959448765	6.867346515	6.843313458	6.449114153	7.460591084	6.005785857	6.042692238	6.167921494	6.3775484	6.164236968	5.866373362	6.345671744	5.777155962	6.287690959	6.206310738	6.188470991	5.989239462	6.071799463	5.909457936	5.6974352	6.950242956	7.206750168
1020	6.919971367	7.165187586	6.895368778	6.796891891	7.01207853	6.946418512	6.808544113	6.593163672	6.846811022	7.192097027	6.874406585	7.151529979	6.752425626	7.207435083	6.627195117	7.528239231	7.100768183	6.565381853	7.0608719	6.576382765	6.91452005	6.906992114	7.293949675	6.828066318	6.647640574	6.924090108	6.328573639	6.681359279	6.482842258	6.748272265	7.239351372	6.88880014	7.099203248	7.366440147	6.949048393	7.310418883	7.260789613	7.288371285	7.123504485	6.869058083	6.983146726	6.961846933	6.876219912	7.12336904	7.147341477	6.908941927	6.983053637	7.768335994	7.413592051
10200	7.658093163	7.997145833	7.845755464	8.039889676	8.24718069	7.687818645	8.347485173	7.648739475	7.928454907	7.986556476	8.414831222	8.048243908	7.923118161	7.992925477	8.147732258	7.674669643	7.952542756	7.942157627	7.991737911	8.069091008	8.258765575	7.886818293	8.366821863	7.69364375	7.764884766	8.331130678	8.078096481	7.903527289	8.048398923	7.925398294	7.761077885	7.894951576	7.824615103	7.837839405	7.906273195	7.627771686	7.872356849	8.003839835	7.65492335	7.933385153	8.157154719	7.800980598	7.725194441	7.917899164	7.881812588	7.332397625	7.705706217	8.938700605	9.116553188
10201	5.377872086	5.404854152	5.095763696	5.358299766	5.371257321	5.57021085	5.280395736	5.441779981	5.633370722	5.268907933	5.489783921	5.083271917	5.221361059	5.505444578	5.454151688	5.444012229	5.10074565	5.45525399	5.780082099	5.55531669	5.766130247	5.558939135	5.598469433	5.345523366	5.328786966	5.335458271	5.229736233	5.344493387	5.181053153	5.283614894	5.209846866	5.454601025	5.126319542	5.115643463	5.522948836	5.141982135	5.301043521	5.373804459	5.498857358	5.697147627	5.362998749	5.468240961	5.345935026	5.298119708	5.147033205	5.04575314	5.259336772	6.420453806	6.423503878
10202	4.13066338	4.226358265	4.225795994	4.465602031	4.363187743	4.268483191	4.017854163	4.060277775	4.284427594	4.229062962	4.352352525	4.144580694	4.24829606	4.091972983	4.168016821	4.370806158	4.146699655	4.148103916	4.077570947	4.069426363	4.032247241	4.100100123	4.22796261	4.253714835	4.254082529	4.089942005	4.188029502	4.11079047	4.164586976	4.197439583	4.204400294	4.044040871	4.06008805	4.120311144	4.314894854	4.179319045	4.161395685	4.282116264	4.114935424	4.316448014	4.104071388	4.265476413	4.309014464	4.309412435	4.487229655	4.27927347	4.458936154	6.130316541	5.246021378
10203	5.763527886	5.764649602	6.042140331	6.042222026	5.54845629	6.015788761	6.204829778	5.869321794	6.503639637	5.919092714	5.940291147	5.541420331	5.966369858	6.208250203	6.160811888	5.800520664	6.131189013	6.240426923	6.273066022	6.360164154	5.831796652	6.130316617	6.274080605	5.447583969	5.911356574	6.561253829	5.812915668	6.103635815	5.966146769	5.976233658	6.230283566	5.975252435	5.744880706	5.979230653	5.987454849	5.641678185	5.249450017	5.746725888	5.952245945	5.51805867	5.936230434	6.16548596	5.901056452	5.914688448	5.555237447	5.791553492	5.756678565	8.085065028	7.941483935
10205	4.268325312	3.992222309	4.126673991	4.215509976	4.203014269	4.280410938	4.426265567	4.184851632	4.655522361	4.342051942	4.473602504	4.407813152	4.468014177	4.588755695	4.75909464	4.31744274	4.447825944	4.736992421	4.389858399	4.944391646	4.435039654	4.408403562	4.408181085	4.24194493	4.426067648	4.667071251	4.2272986	4.338465796	4.446019373	4.371462039	4.301058328	4.546829003	4.339092952	4.249400379	4.414354676	4.375741326	4.420258949	4.395472972	4.381918184	4.594513786	4.445749187	4.308202469	4.321344933	4.443308168	4.240338971	4.169260882	4.106007006	4.519270371	4.638378756
10206	6.384417172	6.474764225	6.512832151	7.266762764	6.122953784	6.733194734	6.723638478	6.605189828	7.143837695	6.409824625	6.897831357	7.073378367	7.04608939	7.283866963	6.545056495	7.469087304	7.201556075	6.717449376	6.884911159	6.914222354	6.732815204	7.044343543	7.413092474	6.789617522	6.569605037	6.875405203	7.562852261	6.322614275	6.990704404	6.867862581	7.289703197	7.047274732	7.313549718	6.760967124	6.719684899	7.43317531	7.125223298	6.917039699	7.566685725	7.168316675	7.368723191	7.499945987	7.760691012	7.049769678	7.268885123	7.010019721	6.894031241	7.87828009	7.791806918
10207	3.89079275	3.626206956	3.767868387	4.025838262	3.845541776	3.736545737	3.730389293	3.836860627	3.825913388	3.61891815	3.726579361	3.653758516	3.744360245	3.627291696	3.638503004	3.92600962	3.727415811	3.656444036	3.659384136	3.727156875	3.550730578	3.738030314	3.818771166	3.751914703	3.788390481	3.683883018	3.897918954	3.66608986	3.657051131	3.5507294	3.794498659	3.600015728	3.712845444	3.828571849	3.666482623	3.703046062	3.823728576	3.721993888	3.66927133	3.766741023	3.826418248	3.711831248	3.761641213	3.726689086	3.939884446	3.837150345	3.722421998	4.079887985	4.039396814
10208	6.35676132	6.284044792	6.081667787	5.996709705	6.168229794	6.229824116	5.683546357	6.189172298	6.210071976	5.901250957	6.06203157	6.185367117	6.322114886	6.096732136	6.082867441	5.982967738	6.227185347	6.28856885	6.356250222	6.468372024	6.232708264	6.203398891	6.47847132	6.338216103	6.250091603	6.227478214	6.194009449	6.351491767	6.303161109	6.426037995	6.268557101	6.249181994	6.643930279	6.417545063	6.296250926	6.215411178	6.193134217	6.344147299	6.579078555	6.082871187	6.106207991	6.384277667	6.160490226	6.259690832	6.135681327	6.045470059	5.981875154	7.7133506	7.492744896
10209	11.01812812	10.78327384	10.61786808	10.73507802	10.64849892	10.62058197	10.92002602	10.61403171	10.94944982	10.791253	10.82511521	11.02175366	10.76503686	10.8302156	10.78825391	10.85118824	10.9625609	11.02405059	10.54293633	10.92627278	10.56073216	10.79939172	10.8617715	10.73996644	10.85380132	10.67459882	10.55936491	10.80669363	10.90333337	10.81268318	11.00962524	10.84974477	11.31808528	11.08672271	10.89628738	11.13663476	11.05780967	11.16099748	11.12138897	10.74741669	10.73755539	10.82857353	10.60593933	10.96484722	10.6924092	10.59041509	10.87555709	12.77584516	12.66139882
1021	4.740547598	4.694459236	4.930401675	5.187128977	4.932316053	4.785760405	4.576525694	4.815813521	4.6026208	4.644256906	4.739062848	4.670438748	4.778141066	4.542890027	4.874434289	4.880718771	4.794117431	4.550188231	4.456541401	4.769937725	4.690397772	4.485796209	4.734759786	4.6835922	5.243215954	4.873904303	4.542841587	4.541840686	4.755699902	4.634227669	4.733637904	4.325626054	4.653686918	4.677944196	4.455119999	4.713109964	4.492483031	4.795207426	4.732589886	4.73723168	4.660880606	4.853944898	4.870177273	4.68593822	5.130185945	5.138024993	4.956130139	5.167253174	5.515038422
10210	5.115702995	4.968561668	5.245523858	4.836617844	4.768811165	4.981991682	5.079795464	5.127369544	5.050501835	4.92840084	5.095306023	5.184309316	5.033567088	5.167938683	4.947160245	5.256061455	5.172927647	4.81128679	5.225432828	4.994538995	4.972805603	5.286076278	4.993025982	4.985596532	4.964418898	4.832785114	4.842175035	5.026291193	4.956881614	5.118865156	5.023698227	5.00186907	5.113207212	5.508943299	4.73246638	5.301039715	5.153389393	4.998597739	5.274629627	5.007357712	4.916868469	5.218003033	5.129208039	5.003886343	4.856699226	4.902010842	4.804264674	6.502136284	6.42194382
10211	7.614969638	7.6658962	7.713906558	7.86227153	7.763609979	7.853421615	8.203257039	8.014916666	7.920535037	7.929850371	8.559159892	7.931932105	7.953902933	7.941886643	8.097489656	7.778391923	8.102792926	7.988359848	7.82646444	7.876701639	8.247142199	8.582824088	7.979697498	7.735106272	7.865225547	8.064791085	7.816237556	8.314783129	8.137083427	8.317399346	7.821874958	8.243981373	7.813319134	7.803192476	9.084775766	7.807831984	7.908997684	7.762305672	7.897585375	7.872645763	8.986321961	7.866974128	7.955843505	7.862840717	7.748344985	7.775085524	7.858682198	10.42820757	10.28521079
10212	6.628388428	6.290010614	6.437028517	6.557940737	6.654291798	6.342218507	7.181836	6.213082086	6.824673685	6.188233154	6.934433065	6.680291605	6.32345442	6.873242871	6.725582152	6.207368718	6.329251805	6.419880717	6.599510602	6.583429795	6.984590353	6.61862812	6.640737067	6.748936024	6.43215584	6.76229692	6.674608783	6.727794862	6.911132464	6.558926437	6.438964451	6.781042775	6.619739636	6.528003735	6.718125471	6.444198982	6.453469021	6.579337594	6.530287756	6.560682527	7.81330757	6.137959303	6.457906586	6.461210203	6.218963642	6.599099038	5.688195899	8.319743936	8.503235228
10213	8.470505047	8.969645857	8.439055411	8.972256105	9.421844897	8.48109051	9.068734097	8.211123532	8.626413602	8.509307673	8.792514744	8.733058934	8.322196307	8.853623058	8.724263635	8.518274051	8.339628455	8.474738181	8.57987326	8.694640298	8.800981874	8.563925072	8.766696744	8.236753307	8.233866877	8.737084679	9.109987668	8.339063932	8.595569553	8.165321722	8.731905328	8.91145686	8.395663211	8.032071022	8.737069905	8.572147382	8.754460413	8.319715012	8.604901254	8.981295396	8.997619741	8.266782434	8.285027877	8.486735121	8.107670541	8.412802408	7.750156496	9.718494917	9.889520828
10214	5.194759666	5.259277544	5.017956473	5.054176105	5.080191276	5.127051267	4.90620972	5.25619601	5.12796512	5.202668302	5.203081935	5.074950723	5.457549989	5.007522332	5.22428088	5.344882948	5.121568413	5.325954866	5.07186251	5.205148784	5.066554385	4.913325529	5.046809414	5.283017808	5.5058439	5.206887655	5.27978339	5.32115364	5.264721134	5.21334473	5.34160277	4.659303999	5.521058563	5.233223167	5.401723307	5.337352494	5.198110564	5.221647405	5.278443174	5.297023315	5.24375666	5.395502508	5.345270131	5.360296537	5.480204981	5.539280691	5.443973664	5.530102552	5.902405109
10215	4.089631077	4.270862464	4.189100991	4.260717395	4.113858562	4.251403654	4.128447414	4.260598069	4.327930916	4.236834326	4.315513245	4.202029065	4.312878228	4.297395987	4.227851846	4.317337376	4.292016604	4.24785451	4.125573831	4.154575288	4.226319168	4.187529779	4.40891802	4.179931176	4.34720281	4.234548323	4.251892332	4.19727047	4.279528127	4.258713845	4.423746074	4.077246452	4.26477954	4.276434196	4.328756039	4.301586404	4.220580456	4.455630685	4.196457975	4.361570926	4.535908333	4.403561901	4.351828331	4.34448525	4.506544463	4.630395416	4.543952677	4.678730048	4.684623525
10216	3.651055272	3.527341517	3.653198395	3.665563696	3.927284997	3.631275448	3.581657029	3.521964806	3.626175774	3.668052349	3.745202708	3.508072241	3.638441538	3.638200175	3.721548271	3.662042171	3.50031462	3.765825266	3.670137441	3.666987093	3.649532359	3.600096858	3.511467182	3.747975709	3.694990845	3.521691644	3.572654335	3.874719411	3.605609139	3.536905808	3.71352431	3.61746835	3.600025824	3.6405792	3.803996481	3.639219074	3.617163335	3.63982006	3.698456421	3.832533313	3.572186065	3.634129254	3.668939477	3.659049845	3.709393758	3.679777685	3.77718563	4.023085974	4.224625643
10217	8.471920991	8.043118124	7.868558666	8.233023246	7.81908897	7.819661162	7.706120093	7.786558178	7.91605126	7.857136924	7.651992948	7.942605353	7.993844802	8.382916163	8.009622316	7.869995998	8.073689288	8.113320233	7.810175279	7.80530935	7.811311358	7.834698205	8.139764661	8.315282117	8.122173454	7.834545934	8.216029494	8.028997951	7.781279373	7.61237631	8.006060584	8.138526104	7.590174323	7.598835972	7.58343641	7.798996026	7.848772153	7.773479747	7.674920078	7.676638486	7.780175012	7.939280176	7.664416287	7.73115974	7.791558127	7.296676316	7.506774216	10.71175674	10.55321318
10218	4.242130606	4.738672339	4.524749986	4.679363765	4.752934802	4.316472264	4.490331879	4.255791288	4.339512892	4.36683091	4.521882579	4.254251033	4.455688531	5.174639183	4.51943991	4.585749174	4.291998737	4.597109863	4.492540212	4.141352289	4.618595311	4.514327403	4.273974898	4.465218696	4.457492056	4.283732658	5.003837904	4.44188244	4.311415057	4.607378849	4.239058021	4.204704052	4.45468909	4.35904069	4.477795882	4.490667836	4.520478467	4.445054528	4.347718552	4.55488195	4.75754044	4.386167507	4.359265755	4.38973494	4.877725397	4.886018773	4.660593121	4.905419044	4.829272883
10219	4.611667685	4.577278656	4.684996494	4.939157353	4.733372677	4.642331487	4.844171202	4.893900489	4.655467533	4.867781349	4.746649727	4.622498766	4.604007382	4.653128455	4.753305337	5.278181059	4.386630625	4.745469127	4.687674247	4.609245721	4.840884746	4.529670308	4.910615535	4.694920737	5.153148665	4.634808585	4.867614255	4.775290864	4.822785868	4.758394242	4.996110083	4.436018587	4.768610792	4.906787086	5.117788141	4.629210998	4.682683689	5.183301295	4.545157857	4.942219397	4.833136213	4.871273516	4.836319007	4.727698714	5.615695087	5.274652532	5.449857259	5.743023624	5.574833969
1022	8.028383215	7.78061921	7.642400009	7.836816952	7.537395149	7.512292138	7.739982828	7.374852376	7.634215465	7.272424809	7.593099986	7.628924403	6.64693596	7.65121071	7.298417523	7.48472413	7.701114433	7.058372192	7.425698708	7.102264132	7.430772475	7.581570514	7.614599437	7.37549087	7.097036276	7.212283746	7.315400345	7.214501343	7.357421279	7.28467329	7.900423693	7.794690078	6.957888628	6.795871534	7.232063274	7.268411666	7.087467565	6.882419502	7.543333879	6.858366731	7.309133782	6.572514647	6.831558784	6.963407385	6.081550459	6.281609053	6.36497128	8.800548803	8.353294871
10220	4.30629012	4.211696023	4.269294377	4.631723128	4.307756771	4.326375467	4.263731736	4.349340468	4.337033754	4.296994544	4.501490062	4.111288567	4.369434476	4.266145201	4.369608788	4.327617465	4.192067351	4.332966612	4.09769042	4.242908998	4.395694694	4.015216006	4.230132116	4.225924123	4.270220156	4.245563419	4.582028375	4.366288198	4.291158606	4.099979744	4.211686686	4.070050922	4.230134683	4.287028226	4.652633421	4.214288332	4.155320256	4.4283043	4.231840518	4.243846534	4.381485759	4.421617273	4.226568738	4.270926073	4.340102257	5.039482459	4.513177596	5.349651993	5.340991216
10221	7.262372379	7.033294792	6.913622487	7.632376619	7.497418135	6.870664411	8.210174879	6.752265805	7.145815208	7.331796687	8.001146877	7.673788751	7.142459472	7.642692458	8.310905799	6.477720158	7.037459523	8.128316539	7.765426624	7.980859199	8.180140088	8.177900662	7.747003048	7.032439066	7.118636204	7.370858502	7.92856065	6.47697468	7.656646078	7.652134948	6.651779573	7.353389914	9.250290996	8.888542721	9.455430893	8.719052128	8.872582319	9.079039115	8.88976601	8.521220212	8.757142731	7.328518458	7.435592429	8.590798931	6.775149556	6.784121754	6.837058134	7.863848602	8.362175086
10223	5.504738006	5.546127415	5.324934268	5.412639046	5.52448225	5.62667038	5.320814947	5.588482959	5.482961952	5.585252005	5.420345169	5.342678204	5.633174012	5.400782275	5.7551513	5.971449659	5.171735562	5.531793182	5.016411447	5.354012879	5.585415652	5.299769426	5.369557356	5.741123568	5.718692099	5.403492854	5.5698747	5.38930121	5.599363834	5.589570804	5.374239619	5.152196257	5.610570395	5.622848724	6.052860509	5.287518815	5.329407147	5.629746338	5.347212128	5.806710072	5.388088802	5.784623116	5.710076198	5.90188166	5.990302935	6.076698927	6.15353248	5.953041846	6.306065347
10224	3.884300713	3.606470402	3.267938947	3.395686245	3.744287876	3.778103562	3.449588897	3.801185554	3.605116241	3.294205388	3.384157166	3.651156	3.76013656	3.661069482	3.603684579	3.678572766	3.721022314	3.726747512	3.832629783	3.696084024	3.398959379	3.715272525	3.768176394	3.340335188	3.612869272	3.585848533	3.387711098	3.596558579	3.528414805	3.730022501	3.757947453	3.639260836	3.591271151	3.766852658	3.649532359	3.406208124	3.506345366	3.729836748	3.670143814	3.54130779	3.916853635	3.715441625	3.569250361	3.541298208	3.461268848	3.591976497	3.585595823	4.27706463	4.093246583
10225	3.77501619	3.663877003	3.714664859	3.931355441	3.504530298	3.744769353	4.014654972	3.715387809	3.798690576	3.670476705	3.663254589	3.692433983	3.839897756	3.64658257	3.726653564	3.993347524	3.772175417	3.921756353	3.75503049	3.857159643	3.907101851	3.716225354	3.672936686	3.761513211	3.600751487	4.213448885	3.709629623	3.614798064	3.974067385	3.722443243	3.769402711	3.68874913	3.748854718	3.817452568	3.915556528	3.442601296	3.772462427	3.621055617	3.820734383	3.774757133	3.651828163	3.757106407	3.736265006	3.783322862	3.830576154	3.800662238	3.832160147	4.169968005	4.328730317
10226	7.693507833	7.581612605	7.119661723	7.71996287	7.590360666	7.72368129	8.353447015	8.105344733	8.150779358	7.682912556	8.090982667	7.534896452	7.856888056	7.913314124	8.205274454	7.337708929	7.757126107	7.865600484	7.523706672	7.711874584	8.111378732	7.716167025	7.372531069	7.68677115	8.145548012	8.123443517	7.608612188	7.938152731	8.271557159	7.584325161	7.726892472	8.161539038	7.322507948	7.300071251	7.739335982	8.089944079	7.627931474	7.703987959	7.581192877	7.469801725	7.714875399	7.343275421	7.316734084	7.433112736	7.819170505	7.534837229	7.551494098	8.024184286	7.933776531
10227	5.09786107	4.661820022	5.115559593	5.141375235	5.580316715	4.947275589	5.594369987	5.141708899	5.379847321	5.165862936	5.571619703	5.143741232	5.375465941	5.680021454	5.103480612	5.157269194	5.153274676	5.197336806	5.113602754	5.610897521	5.440562028	5.693239634	5.287189361	4.971721495	5.104036075	5.554879648	4.984324807	5.62273401	5.105345069	5.198631452	4.875395583	5.91897124	4.847368179	4.668113555	5.014323488	4.727816477	5.152189088	5.525721288	5.105550059	5.082711288	5.606659883	4.827228917	4.929943628	5.118408886	5.154593769	4.904137937	5.128326985	7.519262304	6.971068425
10228	5.239870747	5.351423688	5.211235866	5.3521074	5.13456301	5.330613916	5.502371282	5.334197919	5.497445855	5.443544308	5.435038877	5.312023012	5.327882122	5.371259708	5.29988248	5.228031853	5.467933267	5.61928737	5.542540822	5.38115672	5.486884551	5.506134832	5.285712451	5.312661434	5.353992584	5.437874164	5.293315331	5.442398821	5.417494708	5.485966732	5.479510416	5.503025808	5.27960723	5.272455414	5.263045776	5.317840334	5.348122778	5.223446663	5.29448459	5.138036106	5.247332082	5.463487079	5.33901341	5.284143962	5.283876449	5.348501095	5.170287043	6.737254523	6.729244462
10229	6.121625943	6.047493108	6.148241156	6.158070055	6.266837704	6.273486306	6.330303286	6.136177911	6.224441634	6.040855508	6.254696244	6.084435048	5.741328726	6.117468899	6.218948437	6.040536614	6.121748473	6.009912323	6.215985225	6.048308577	6.179418858	6.248502303	6.193649289	6.142560096	6.157143044	6.365687817	6.324819361	6.181288765	6.259272313	6.076938685	6.057461543	6.159124045	6.18678592	6.237264994	6.043598856	6.019479773	6.064845057	6.152172499	6.223038547	6.142122613	6.354498914	6.114586895	6.219837706	6.102123225	6.122981	6.090615272	6.197920114	7.429863906	7.187561938
10230	5.362858185	5.363110733	5.489619547	5.817061628	5.434276751	5.374296008	5.102545167	4.897660098	5.179767064	5.529349302	5.260677142	5.371236465	5.291353985	5.410164394	5.161118171	5.580608592	5.371030808	5.240577185	5.293130007	5.310143155	5.345524131	5.097189838	5.29296641	5.413137862	5.2967548	5.12000395	5.575515759	5.26885701	5.320857216	5.438541683	5.679456778	5.322270498	5.085878082	5.370956883	5.282638901	5.306389049	5.116987576	5.43707383	5.195535134	5.2328333	5.352078932	5.452344818	5.314728778	5.210940961	5.482776821	5.486444227	5.708408206	6.663964367	6.542748436
10231	7.757985066	8.563972634	8.169971938	7.828556514	7.102622335	8.135404113	7.912365101	6.854347826	8.110912867	6.850721374	7.491461881	7.290875394	8.455477942	8.133047848	7.525124877	7.622799155	8.154650641	7.843430044	8.354903628	8.397391117	8.148688466	7.618530814	7.968182622	8.251181775	8.78465145	8.133980495	7.656650807	7.742232839	7.933874406	7.48724119	7.712553149	7.098656339	7.538075215	7.564763526	7.21965582	7.832417187	7.901229591	8.175446511	7.704137172	7.705952326	7.64656067	8.557310452	7.796156746	8.393124372	8.047671674	7.803005198	7.640149528	10.25465437	9.786793917
10232	3.581738091	3.746786837	3.995000453	3.882976728	3.6860151	3.662859213	3.545676965	3.55728544	3.590010404	3.764244178	3.616117868	3.697235648	3.721747273	3.645649458	3.612013183	3.683171066	3.492176151	3.628528231	3.595511925	3.811687987	3.587819104	3.699679033	3.705846308	3.511997417	3.732929068	3.818394961	3.647685595	3.792822212	3.503637097	3.695697638	3.83706433	3.518587071	3.712418906	3.534928893	3.822815115	3.623769352	3.72557364	3.749417639	3.710847788	3.628074498	3.796045051	3.672541298	3.635264471	3.791490696	3.766504966	3.908755174	3.905667292	5.031199358	6.132491912
10233	6.610462631	6.556922051	6.880816074	6.647730027	6.661630508	6.501046411	6.261483204	6.298013378	5.936344371	6.659820097	6.077663712	6.21977388	6.305988908	6.673688699	6.242830878	6.427852762	6.581777106	6.476831757	6.612681022	5.835502579	6.039335447	5.951066992	7.137554811	6.5965661	6.333511707	6.004212629	6.47118405	6.064997093	6.021630883	6.206541533	6.915049758	6.241518364	6.951952153	6.767370121	6.493848092	6.764837784	6.767244727	6.657713616	6.803683743	6.903136552	6.405226812	6.714305463	6.480352613	6.640961823	6.592145076	6.75278472	6.762219979	6.015545008	6.124324103
10234	4.255123999	4.28053504	4.438360527	4.465243285	4.264887149	4.194095288	4.24395128	4.485282045	4.446122661	4.064940102	4.09704531	4.466804074	4.382180479	4.183502532	4.081100915	4.115426587	4.104716967	4.103171706	4.154863925	4.443059783	4.078208444	4.133964408	4.46587488	4.487080503	4.241607324	4.034010608	4.088062092	4.347894847	4.297249798	4.349701445	4.406913995	4.010710246	4.216178871	4.177048328	4.217335175	4.367475082	4.126611967	4.337921036	4.265254366	4.382001978	4.178172898	4.343146787	4.280404036	4.237644033	4.466793494	4.287572866	4.434124275	5.786689634	5.678835653
10235	3.867042371	3.855245703	4.160782872	4.102267478	4.146983089	3.927279423	4.191833771	4.023910508	3.838709633	4.030959894	4.062297847	3.846702008	3.982527403	3.972844398	3.882983783	3.949056154	3.83938758	4.118157263	3.910550652	4.158483518	3.917180756	3.932739572	4.043936329	3.931505347	4.173451114	3.993574573	4.199506233	3.919662249	3.927565274	4.021529309	3.84959174	3.904930572	3.942256739	3.940906878	4.085901584	3.893045115	3.896381784	4.091196502	3.800683929	4.158698827	3.954391517	3.973698913	4.017393432	3.919287208	4.216241651	4.251773	4.248273745	5.739706133	5.642529164
10236	7.973514136	7.596148097	7.714070542	7.939792701	7.833529422	7.845594721	8.255283048	7.842674636	8.442540957	7.842621364	8.145155611	8.105903356	7.897502431	8.093495571	8.061383684	7.664601103	7.949986007	8.135774126	8.046652823	8.24358204	8.187118925	8.063510841	7.721002018	7.879979562	7.857453771	8.158903412	7.831913378	8.322804912	7.986961446	7.636638714	7.905392457	8.084742035	7.561372944	7.553804547	7.756220653	7.654325752	7.76294484	7.573439783	7.546385805	7.62112228	7.975160033	7.787656264	7.695914517	7.695922537	7.362808426	6.886664554	7.203161798	10.06941146	9.834488365
10237	8.181680312	8.380927681	8.192874943	8.056972381	8.462876161	8.137467977	8.38619014	7.945341766	8.004463097	8.2143514	8.187636224	8.200663332	7.826375286	8.430581881	8.166919301	8.075760092	8.046436673	7.77843753	8.201432648	8.034460464	8.163940695	8.13559296	8.293863181	8.164662744	7.716142096	8.369150353	8.194591966	8.145613344	8.024563576	8.194632847	8.250932276	8.129636315	8.132813381	8.051612074	8.58019578	8.360017155	8.156751565	8.206151799	8.39642	8.410655394	8.618716846	8.238594407	8.193543949	8.159684533	7.59893447	7.714577194	7.565799802	9.782739767	9.605594179
10238	6.486669352	6.451005289	6.499651871	6.596877386	6.694434328	6.500876993	6.671441414	6.47510836	6.624427325	6.471665403	6.544490757	6.444098129	6.412607439	6.547387267	6.529451435	6.352420546	6.465407443	6.527681047	6.563673804	6.464760267	6.647142932	6.69002978	6.318392414	6.507440253	6.473434847	6.569924986	6.663501132	6.425430724	6.455788417	6.427388005	6.503217209	6.636829121	6.359374624	6.309302985	6.18433294	6.365686041	6.378956249	6.205916703	6.409940759	6.305615143	6.62610894	6.329351203	6.321834338	6.375719196	6.205492572	6.413981787	6.399413316	6.788823108	6.744001426
10239	7.786221249	8.111173553	8.416021483	7.66672837	8.184180276	7.826199332	7.73313908	8.082607268	7.973160946	7.802713128	7.903971686	8.082771295	7.459656685	8.049900722	7.739394789	7.998967049	7.782464155	7.761343571	8.062942462	8.046749446	7.945942152	7.896992977	7.898938089	7.876049819	7.548644723	7.909429064	7.696821039	7.837744286	7.687019904	7.731157547	7.950605963	8.058381444	8.103837607	7.905094606	7.659402228	8.293289807	7.901740355	8.271374823	7.929796642	8.175910023	7.954465664	7.773531637	8.088251136	7.919282147	7.612090011	7.652649496	7.433215407	8.420854583	8.277260401
10240	7.671106186	7.935913211	7.886290323	7.638836698	8.017254419	7.691391927	7.652566364	7.627288597	7.769258221	7.610554171	7.739284589	7.79173585	7.556541452	7.952807507	7.978275687	7.686791373	7.849765645	7.47785105	7.805166711	7.897575757	7.772380461	7.82474657	7.967978975	7.580014827	7.457476862	7.667213722	7.744430106	7.34624452	7.706865828	7.67494867	7.615046903	7.610840637	7.185743372	7.724620302	7.64640802	7.834875282	7.466138898	7.853587474	7.826351334	7.309551452	7.819071085	7.600185916	7.732092809	7.592083494	7.287597864	6.880595009	7.360602417	7.695603389	7.744974612
10241	8.804639618	8.93196159	8.948726963	8.839249628	8.853778905	8.686744651	8.754326097	8.677940846	8.885746844	8.728819902	8.88061814	8.723178742	8.719765758	8.780439535	8.635765142	8.658635293	8.856552993	8.749775805	8.865910437	8.964220669	8.834014441	8.877208623	8.835097471	8.864775642	8.936304618	9.137383256	9.093459284	8.939191097	8.802799871	8.793257476	8.908115083	8.827683711	8.819849443	8.559174453	8.693719413	8.693836705	8.62843301	8.893722807	8.820626451	8.88381373	9.000882484	8.492028949	8.696843371	8.606869855	8.297577599	8.320708118	8.106872743	10.87922682	10.58497744
10242	6.816206565	6.796338714	6.790872258	7.052128656	6.844054543	6.867653925	6.579111321	6.617349423	6.744561427	7.060674552	6.761561952	6.818344394	7.058226674	6.484080199	6.902886488	6.760296963	7.089272432	6.90767586	6.61197399	6.656050648	6.631632549	6.348282628	6.833879331	6.734450055	7.016095929	7.028077837	6.684011875	6.804938893	6.747306047	6.704275416	7.301688084	6.381228936	6.931140839	6.933579065	7.161763715	7.141594482	6.720162142	7.239904349	6.68891022	6.707423442	6.853793164	6.719926221	6.869390296	6.976173659	7.149865695	6.743221095	7.259879824	6.651876592	6.963040507
10243	6.566769092	7.452287332	7.347480315	8.008515176	7.589764297	7.769027502	6.676194947	7.10022915	7.065100998	7.451990318	6.959901063	6.645827661	7.176753716	6.916296123	6.95439408	7.431947242	7.601624612	6.485900522	7.619648837	6.554707007	6.682122292	6.879156813	6.906463194	7.160550626	7.375085515	6.998745033	7.238448977	6.468827762	7.420227295	7.163827621	7.014456209	6.847906967	7.544221645	7.415739076	6.426163182	7.637840116	7.375229208	7.157963385	7.151875549	7.260407087	6.289941716	7.067386758	7.102681318	7.035013981	6.878055132	6.80077248	7.06784035	7.57010044	6.719701323
10244	8.159952219	8.209630355	7.984494361	8.255740798	8.344952617	8.023540801	7.803095063	7.998799362	7.830960119	8.311307451	8.098026311	8.45885323	7.969608855	8.093765867	8.078369506	8.247309634	8.001076487	8.150722042	8.125176894	7.965524672	8.073173161	7.93393878	8.515978958	7.829210947	7.65417619	7.709050515	7.998294698	7.939150384	8.043169314	7.996780679	8.023497998	7.934712306	8.108369447	8.246671755	8.193621362	8.022482099	8.095192302	8.242016199	8.06605211	8.255780965	7.972497643	8.174369078	8.315722939	7.977185592	7.50254666	7.559254592	8.019777579	8.204189649	8.083894151
10245	7.478625964	7.545880883	7.781624241	7.460253251	7.544736161	7.545602411	7.521698136	7.592286386	7.446243306	7.666280046	7.658528837	7.685566537	7.41369555	7.699336448	7.367862343	7.590583612	7.512776552	7.492282335	7.442175875	7.284914246	7.628178079	7.734239393	7.708221112	7.551686793	7.50349482	7.221325064	7.733771619	7.534141829	7.578263118	7.804848748	7.619906291	7.617290924	7.678323222	8.043031467	8.035194898	7.722074748	7.664726812	7.790479882	7.408325577	7.974674504	7.976172348	7.853727548	7.752348462	7.668528692	7.719005838	7.941035088	7.970411101	8.317243783	8.242594204
10246	4.410819189	4.285769353	4.167718762	4.484865032	4.26037668	4.335747431	4.470447417	4.504769241	4.468235198	4.543003665	4.524906006	4.710629436	4.408032672	4.271526215	4.547378207	4.78682199	4.348729618	4.679334017	4.265914932	4.706619817	4.363755904	4.364047737	4.341653673	4.383195032	4.316687058	4.383189703	4.352684643	4.259197055	4.55577808	4.408089695	4.396535067	4.25639045	4.336303424	4.410550202	4.760796046	4.419920759	4.487945261	4.300413496	4.406407548	4.650597264	4.479587082	4.230357635	4.306298461	4.418795351	4.41130284	4.386231456	4.331296025	4.876283879	5.013042317
10247	12.02969206	12.22148714	12.04310059	11.7803817	11.77129031	11.95822044	10.49442297	11.90100102	11.38979977	11.89980492	11.14529165	11.93258073	11.56616155	11.92853457	11.21525764	12.08245893	11.91894711	10.63119653	12.04374732	10.65794084	10.78251558	11.35381758	11.67631233	11.52714665	11.34524692	10.7458858	11.75064819	11.19919674	11.20271113	11.5549918	12.22831703	11.25390567	12.11901289	11.92918029	11.40544496	12.10354012	11.94436292	11.78580032	12.26363304	11.88613181	10.59420657	12.05911147	11.96215165	11.87434612	11.84984273	11.91101797	12.09957178	8.198561188	8.423252511
10248	7.177616816	6.955823957	7.058376512	7.000741459	6.790621527	6.953603809	7.071096198	6.829871022	7.155622505	6.987695505	7.089065296	7.086558983	6.812966444	7.284832666	7.100720144	6.651123614	6.941350332	6.876437769	7.030711871	7.031268249	7.233959347	7.238234012	7.472989588	6.681315797	6.990698975	7.004586526	7.209679478	6.985508971	6.893461753	7.046491451	7.00719961	7.265363254	6.762172313	6.896824993	7.229630416	6.91228057	6.926897384	6.77083105	6.884578397	6.833598377	7.409831027	6.922710983	6.848837545	6.786933072	6.581387574	6.837775881	6.815631121	8.186727564	7.970051938
10249	10.72738238	10.88411853	10.78057641	10.5704872	10.29371281	10.57989796	9.394214844	10.42076818	9.761914463	10.59282771	9.952906978	10.52192942	10.29197874	10.56697648	9.995743173	10.74405061	10.49548277	9.699401953	10.82717424	9.522153812	9.83340011	10.48964054	10.67651697	10.73503796	10.24786523	10.1213464	10.44353275	9.991568515	10.10352859	10.71734513	11.00585411	10.35119913	11.12156742	10.96755611	9.243721147	10.80723973	10.72913123	10.8103235	10.98795547	10.58335523	9.809675762	10.56426602	10.41907155	10.63968897	10.45068371	10.43008611	10.56082446	7.165042925	8.36217228
1025	4.960990818	5.426839442	5.555488809	5.756129069	5.302640108	5.443085189	5.895709153	5.230876186	5.549583576	5.399557752	5.438529379	5.13993647	5.132517954	5.535747698	5.333455687	5.472237412	5.568871396	5.191876235	5.478528355	5.550273304	5.733291649	5.338660894	5.506308004	5.405976191	5.495966183	5.550598305	5.623858159	5.076016104	5.339213189	5.446776315	5.399141026	5.212496749	5.502199587	5.468004265	5.28999872	5.17131995	5.206135041	5.585606202	5.360799526	5.125488799	5.396112222	5.231701387	5.507830902	5.344184587	5.112793199	5.512346685	5.337075642	6.882324791	6.790993969
10250	7.949422242	7.921537354	8.066425812	8.113918853	7.7812998	7.808750092	8.097362937	7.928603407	7.988748662	7.922224266	7.87885663	7.900242144	7.984153602	8.067936697	7.9504265	7.703661498	8.023656829	7.847558041	7.992894367	7.875155684	8.066632841	8.032330303	7.792529456	8.045183893	8.212132023	7.46354906	8.122863858	7.764673239	7.952317831	7.815104827	7.865682283	8.381548223	7.937134695	8.064395766	7.703340286	7.888141773	7.914488269	7.521963542	7.850618181	8.193869203	8.173775817	8.06394654	8.065309005	7.902504345	7.403632845	7.619153183	7.211936881	8.259828493	8.887589523
10252	6.190495208	5.931963738	5.796135622	5.919142369	6.027204323	6.012017866	6.55932496	6.351534671	6.178104274	6.207614533	6.289693322	6.287429886	6.033624182	6.551410725	6.7690995	5.522650723	6.03907781	6.606090106	6.161520293	6.586216382	6.148198496	6.287619725	6.361016854	6.095521638	6.356713794	6.199584828	6.482219991	6.018308775	6.364414563	6.088171991	5.948907453	6.118836492	5.617797145	5.661677089	6.234203856	5.838063227	6.028619934	5.841761081	5.980348526	6.172580256	5.837964537	6.073314151	6.009758539	6.003810053	5.95133186	5.999563325	5.687813674	9.216657717	9.248818821
10253	6.204909634	5.721575465	5.638361746	5.386392264	5.858235598	5.806772493	5.826185274	5.898264833	6.03184001	5.654985366	5.306160997	5.95415573	5.917588682	6.517100138	6.046078548	5.674612104	5.952008286	5.885524527	5.79231511	6.092065017	5.781450701	5.814789082	6.420193521	5.795477361	5.710875535	5.929658093	5.390024744	6.198866586	5.773642716	5.844248019	5.931920985	5.614968938	6.484681318	6.121388694	5.567738895	6.365981955	6.401554314	6.507775135	6.71761272	6.138764222	6.005954336	5.845756962	6.136161235	6.529093304	5.87666368	5.550537367	6.036958091	8.002706415	7.703868824
10254	5.449291798	5.414602644	5.550690244	5.444706804	5.573247875	5.525047975	5.61161156	5.416258291	5.606158984	5.379839821	5.731816918	5.590808902	5.514405589	5.634899177	5.561084327	5.54507655	5.882404857	5.445715229	5.557863441	5.55229717	5.435949742	5.74425171	5.585149114	5.466182949	5.561774584	5.86476556	5.574767658	5.739111985	5.838509732	5.674490799	5.62849046	5.545825094	5.811735438	5.558042269	5.773384746	5.558720228	5.458008284	5.672626672	5.51416939	5.323639725	5.810687876	5.658080757	5.33735977	5.484705554	5.434634821	5.353548974	5.227749735	5.782057875	5.861902649
10255	5.39026683	5.284633011	5.649743464	5.711306936	5.552786233	5.347518048	5.248598799	5.274709083	5.049194623	5.474014651	5.290083375	5.198905873	5.247077413	5.523243818	5.315071903	5.560634575	5.279077111	5.317739911	5.235019435	5.119702536	5.262135778	5.203187063	5.30323765	5.219068357	5.632576245	5.02658803	5.477753546	5.241185285	5.201773088	5.258365137	5.277085571	5.324189657	5.375528106	5.446088497	5.423655746	5.525420151	5.39868957	5.347427279	5.222841959	5.575928559	5.413105388	5.457985399	5.4425596	5.466634444	5.445001457	5.587600579	5.502257413	5.474343561	5.242902257
10256	4.641980602	4.875655329	4.642278816	4.789160608	4.636407121	4.745657762	4.603022429	4.727299954	5.022911321	4.843596254	4.80246801	4.863104517	4.839048124	4.635949899	4.910976539	4.963502572	4.788062932	4.688380109	4.622006857	4.686282668	4.895657851	4.797186243	5.050404101	4.878572537	4.800983433	4.634397938	4.994729781	5.275104016	4.954589632	4.837819001	4.957892697	4.33921724	4.75003368	4.830994558	4.787386641	4.781176338	4.845783503	4.712492226	4.561877557	4.69434869	4.748540123	5.025090018	4.804847445	4.804373129	5.082082863	5.339570151	4.940481778	4.876444868	4.910618991
10257	8.320675807	7.665556203	7.37416495	7.531558627	8.540164723	7.785566368	8.321486384	7.880472838	8.390516308	7.958337527	7.476835727	7.752803525	7.760023673	8.367255833	7.994078491	7.642610162	7.929193722	7.600512353	7.983082336	7.376233647	7.781595959	7.55649474	7.434891699	8.164788933	7.751591384	8.099996252	7.221329136	7.845688678	7.780605662	7.444763788	8.192021719	8.32030409	7.444669294	7.350361357	6.550131814	8.199456066	7.68798095	7.683231255	7.605064622	7.922532797	7.7661133	7.73533756	7.676474362	7.660976773	7.529057148	7.095697622	7.169602278	6.049494997	6.278411052
1026	6.826107598	6.945405842	7.217412661	7.27786267	7.190676751	6.958537792	7.800825328	6.826680526	8.047627289	7.643793172	8.233489725	7.305893495	7.706899714	7.667687231	7.272833049	7.319874908	7.639252688	7.9414768	6.991977937	7.321661491	7.429762665	7.241454758	7.388599	7.151028072	7.21670172	7.747782553	7.591705198	7.243878562	7.683687903	7.400531397	7.589336832	7.9424002	9.022556904	7.733257778	8.597955157	7.512530225	8.150595618	8.342252242	8.26049819	8.226781905	7.725945995	8.106259987	8.20354472	8.546461535	8.331031921	8.826949207	8.047174102	8.272410947	8.914976607
10260	4.242503254	3.971647164	3.768695777	3.844373198	3.84181996	3.96283204	4.11073646	4.0684033	4.319336804	3.875270234	4.003039177	3.982330685	3.998791641	4.076668496	4.160568528	3.915235132	4.007116261	3.801002179	4.353777054	4.112908577	4.22904975	4.413694285	4.010041651	4.155415945	3.960546034	4.178898139	3.977586789	4.022904355	4.087460935	4.719230394	3.958340544	3.971421561	4.20554883	3.90790505	4.162805615	3.994988159	4.331186833	3.848808239	4.022108601	3.696904112	3.838322846	3.984100704	4.007647882	3.891046903	3.831433453	3.939437207	3.963705998	4.641713722	4.841993146
10261	3.869580688	4.116416539	4.014536919	4.043141737	4.261564761	3.823902713	6.089114634	3.943644503	4.817448187	4.332527821	4.426732802	3.983155964	3.88129738	3.905252573	4.258010959	3.889432934	3.81319516	4.084334133	4.184503255	5.230293883	5.039447946	4.066220858	4.047571759	3.844302077	3.887593268	4.355511874	4.325819736	3.863624565	4.136437938	3.934757607	3.740013046	4.283237812	3.769423159	3.779932241	3.772216884	3.730165879	3.916156998	3.946685418	3.682062581	3.767632336	3.900810305	3.757422553	3.763356004	3.642921646	3.895989052	3.789102148	3.780905745	5.917493481	6.846358246
10262	5.237967703	5.270218129	5.306286506	5.419947825	5.047739574	5.520769723	5.416285958	5.492576986	5.128209982	5.437027452	5.681572077	5.166096188	5.507322394	5.163693884	5.564750251	5.257960257	5.438759791	5.389156287	5.088958866	4.915132936	5.300386096	5.527618	5.252882452	5.207050894	5.480020943	5.112677992	5.217191536	5.305516245	5.643250324	5.32768903	5.52115182	5.960841418	5.755584602	5.645699067	5.617216057	5.429744331	5.295694822	5.286204079	5.588651653	5.577000127	5.849434948	5.493364587	5.726087892	5.417099823	5.281043712	5.606288213	5.309766954	6.558982748	6.831434022
10263	6.986285839	7.153710633	7.366978751	7.167215741	7.564069123	6.975518063	7.877088292	7.009336492	7.356690787	7.45961727	8.332030976	7.900644882	7.298913624	7.98353633	8.079339124	7.286524703	7.360033563	7.215973782	7.513625482	7.218482097	7.916848148	8.12103266	7.31031261	7.232589718	6.490047117	7.929976267	7.288745514	7.625395492	8.064473962	7.449015551	7.019274977	7.728286033	7.95234711	7.657982055	9.142257196	7.127859449	7.387276648	7.642982474	7.168304522	7.365884532	9.056134429	6.761300787	6.976636587	7.341374101	7.016400181	6.570030821	6.939319195	7.30805706	7.15973993
10265	6.640645255	4.284274094	4.528439155	4.297589033	4.146653081	4.544966363	4.335204972	5.721973418	4.26927778	4.843655385	4.679054202	6.655024834	4.276804202	4.211305782	4.390871036	4.582820085	4.36766591	4.387854231	4.160195543	4.249079527	4.193318635	4.300947997	4.309395761	5.206255767	4.629886051	4.3223951	4.330289909	7.528226199	4.270550636	4.386242488	6.287588225	6.255980354	4.354182881	4.500519501	4.852354984	4.513631477	4.196360871	4.571257682	4.407147873	4.3610548	4.382739372	4.398799966	4.446273966	4.404824928	4.3249232	4.522840753	4.722196867	4.624987339	4.706037386
10266	5.797063784	5.932261764	6.40839043	6.059174586	6.210520022	5.786913049	5.7169092	6.145190526	5.766938224	5.952877414	6.065703842	5.955110047	6.043244151	5.702348245	5.915481834	6.594438268	6.039596837	5.730086915	5.53360506	5.758333079	5.637199605	5.903509602	6.453447895	6.033159199	5.935483671	6.16868497	6.073548111	6.008087836	5.850908279	5.826698819	6.200857529	5.702594804	6.01771521	6.192285099	5.983512381	5.86857023	6.032037136	6.140183835	5.864671145	5.893257919	5.941603563	5.725840606	5.963096458	6.250063701	6.334945751	6.41627472	6.169382917	9.825208121	9.225162728
10267	5.609440333	5.839431128	5.864410998	6.004240983	5.880527342	5.606269624	6.000792296	5.766383912	5.837831784	5.875549744	5.82420324	5.752358838	6.152848548	5.815366813	5.929240715	5.989368776	5.899245594	5.697582183	5.566104014	6.41605326	5.929208872	5.565501616	5.673324384	5.779807864	5.907149283	5.775590629	6.125829811	6.02987153	5.936559022	5.548463196	5.6564099	5.382467879	5.811070805	5.771629781	5.82026363	5.848021495	5.86970894	5.703726977	5.555947253	5.913417177	6.18012597	5.87176366	5.807045879	5.849353644	6.10030811	6.322901749	6.168272644	7.132115205	8.108385659
10268	7.552858479	7.94021064	7.691316592	8.734599293	6.930464239	7.531612048	7.251863141	7.500409814	7.628839483	7.944786641	7.425013467	7.210246343	7.868522056	7.309117148	7.401689209	7.245411863	7.220483207	7.46146238	7.620883906	7.821514845	7.663349024	7.460970594	7.706097963	7.804088731	7.883538789	7.575029028	8.171550723	8.083645762	7.65001831	7.588960994	7.308141554	7.115245156	7.203095436	7.251463945	7.277433221	7.512139862	7.108636079	7.101000708	7.24189154	7.754174737	7.292689293	7.225628	7.312401624	7.153586594	7.253450303	7.684097808	7.557700818	13.02327797	12.36586769
10269	9.851203981	9.978989732	9.891301687	10.01809613	9.732098855	9.909567023	9.739642347	9.624120399	9.879823125	9.829088309	9.796523238	9.898554704	10.18077618	10.24217427	9.972316206	9.796631265	10.13885181	9.977726273	10.19968425	10.03733182	10.02427882	10.03471982	9.925973361	10.03703452	9.959574805	10.02447212	9.945945424	9.663058587	9.754505869	9.783293059	9.79087814	9.895970415	9.830214542	9.640122503	9.678314848	9.866365955	10.08383761	10.05888424	10.00051901	9.811679802	10.10366089	10.10189188	10.01660895	10.15173107	9.818945127	9.530254342	9.704120294	10.07166687	10.20030319
1027	7.661928386	7.737962043	7.716496031	7.857271068	7.562891114	7.602725482	8.065109778	7.718365546	8.057650161	7.4450713	7.395805275	7.717099642	7.474469422	7.896252778	7.676606738	7.419460586	7.83633102	7.617350717	7.986714886	8.262325215	7.83345116	7.781346159	7.749262969	7.347085886	7.73994993	7.459142846	7.26025355	7.658361412	7.671866094	7.553456442	7.503017868	7.777281851	6.806501536	6.875086835	6.828527855	7.394172986	6.767228565	6.833941576	7.262175861	6.691355127	7.342866254	7.682382846	7.647480388	6.906849446	7.089648331	6.742117658	6.845391989	10.89764027	11.01133303
10270	6.344239473	6.391528154	6.397045475	6.478595726	6.661608479	6.438946726	6.254236458	6.468095523	6.461350138	6.535819128	6.417559591	6.36040861	6.27607491	6.608406523	6.406627752	6.23066898	6.488391166	6.466888371	6.52387843	6.386094482	6.472280929	6.534414356	6.679268044	6.39349042	6.565710444	6.460230875	6.712763461	6.585738117	6.346366073	6.366717663	6.541601527	6.390103504	6.39600775	6.748636844	6.681010363	6.68229385	6.548258023	6.621696052	6.470869074	6.6036892	6.866335564	6.610764092	6.581148861	6.60441401	6.525579591	6.656791372	6.50723066	7.823947263	7.854696322
10272	5.327909899	5.358755996	5.575484847	5.406762476	5.647448091	5.297986414	5.761541704	5.306840051	5.626684243	5.704993166	5.802020224	5.585516828	5.946131821	5.6755037	5.58465216	5.718725425	5.950163695	5.958484613	5.33235241	5.297933385	5.718279929	5.519452557	5.709554732	5.375244351	5.545194158	5.753234843	5.845898273	5.919449621	5.839474314	5.754790076	5.474479414	5.57143351	5.799882711	5.586494523	5.618735663	5.687804935	5.733039077	5.688291329	5.716754555	5.920596713	5.671805058	5.617304529	5.807112169	5.846848547	6.183218957	5.950257052	6.16854551	6.206091935	6.151607446
10273	9.173733078	9.00018965	9.154274831	9.343013547	9.119180407	8.959374306	8.711537859	8.94282409	8.650830176	9.114195172	8.768626965	9.139710956	8.683789822	9.090965495	8.991355931	9.141460672	8.775684252	8.766152076	8.891959951	8.831913162	8.689482338	8.828594806	9.013629398	8.934894591	8.846526447	8.342265554	9.232794193	8.736439967	8.710018756	8.653402729	8.933027543	8.788179116	8.989919877	9.096073818	8.766660575	9.103952325	9.101057456	9.066155609	9.12774061	8.970377604	8.955564473	9.029665815	9.17586393	8.984133592	8.705546514	8.953920173	8.973840832	10.12717846	10.09030465
10274	5.174620874	5.201369848	5.110900972	4.980515336	4.84633018	5.263807759	5.304702717	5.129574812	5.179841174	5.255938571	4.864752291	5.260081088	5.084059784	5.096550629	5.123110413	4.985545158	5.360337135	5.256623188	5.61194137	5.579816623	5.349617753	5.494456818	5.143146376	5.033363122	5.237009718	5.028629891	5.320950346	5.207365672	5.223313848	5.318706924	5.337655579	5.806762224	4.94167322	5.061166597	4.802495153	5.241146117	5.363815605	4.980502538	5.069631268	5.093485054	5.132331799	5.22592134	5.177996154	5.130399674	5.183981345	4.742309847	5.057980022	6.261730075	6.32127218
10276	8.326863761	8.594784356	8.707322889	8.407898751	8.87033254	8.429531099	7.527707021	8.574278096	8.329085787	8.180433285	7.691286192	7.38176912	8.013862401	8.175703988	7.758456128	8.136163828	8.423565308	7.047047726	8.710669938	7.663667966	7.593333238	7.979529858	8.135231714	8.379090651	8.373149939	7.812649386	7.711134203	7.311381473	7.862062284	8.418171561	8.325275771	7.446270934	8.061637421	8.2754039	7.542252788	8.438698959	8.514060687	7.815757826	8.389756124	8.1388204	7.800138099	8.726507218	8.775799034	8.685483993	8.184085679	7.868252058	8.208696665	9.481468608	9.406020416
10277	6.474864511	6.432167542	6.50078143	6.454420561	6.34288938	6.451381041	6.447677626	6.405263412	6.224540041	6.382299601	6.345922942	6.369396671	6.380995647	6.597361844	6.443781807	6.47678412	6.587889743	6.498031636	6.440049218	6.345471664	6.408868508	6.414222591	6.173134794	6.345914228	6.451451577	6.569518629	6.406249091	6.401536842	6.594542397	6.325392796	6.543220227	6.665301284	6.400784333	6.592608518	6.371914925	6.650424001	6.467940437	6.490243351	6.48982825	6.539493405	6.6377864	6.487456651	6.375012381	6.486163076	6.470429847	6.321346087	6.396667291	6.968314642	6.903516592
10278	4.398273548	4.266350127	4.188809665	4.282554838	4.456533258	4.357142359	4.235963824	4.258600743	4.1096741	4.317348609	4.33942401	4.260378451	4.456034299	4.223541001	4.270968529	4.531447565	4.180438104	4.5274791	4.071817211	4.385316855	4.137410671	4.251625399	4.212026351	4.251990303	4.407086841	4.108992052	4.36168851	4.39910977	4.305387872	4.20776551	4.412372556	4.215733881	4.335117208	4.397239936	4.603091716	4.364056218	4.339268656	4.432993636	4.333836136	4.55221192	4.30488509	4.463209328	4.299344785	4.470174211	4.613868594	4.770429457	4.871812556	4.840316692	4.908805882
10279	4.643908613	3.98814811	4.404517856	4.430006951	4.24071203	4.308938866	4.3378938	4.424086844	4.335892135	4.250977436	4.308778741	4.487179249	4.339959639	4.122908275	4.459695926	4.369214336	4.237436967	4.312680456	4.187607014	4.488188976	4.505914142	4.140765959	4.117462083	4.202216078	4.216105558	4.414614189	4.391539472	4.739120765	4.342598711	4.404664482	4.435381729	4.328636338	4.171531669	4.277038221	4.561289787	4.320608695	4.454109011	4.370648791	4.188764399	4.55488195	4.330603537	4.408212392	4.228247761	4.528183423	4.493505844	4.681150903	4.543690805	5.124323893	4.979612554
1028	5.20668734	5.809385248	5.831660955	7.411542334	5.591570877	5.539991475	6.504306784	5.677095298	5.488642353	5.820284776	5.429655527	5.648306083	6.055761294	5.602027299	5.875210079	6.122497024	5.966387043	6.286526666	5.511300682	6.081122285	5.587222811	5.772876395	5.654688912	5.964087845	6.177492911	5.301734653	5.981599752	5.243788715	5.864695986	6.005861664	5.625564012	6.014768993	6.218624573	6.189595537	7.782300867	6.576768511	5.962116539	5.984309767	5.703883084	6.11741493	6.270062647	6.17583117	6.273013733	6.099835918	6.489572616	6.292875313	6.20587448	9.278805423	9.114665237
10280	6.057501725	6.045838624	5.946882281	6.020578088	5.959697896	6.146846296	5.985019371	6.139985529	6.14895947	6.209059889	6.080992263	6.188646335	6.279190117	6.227108948	6.143305929	6.005487755	6.204246961	6.290498484	5.974693445	5.781699597	5.93792218	6.241811454	6.119381453	6.016211615	5.948497259	6.193561859	6.017647543	5.907017999	6.048571528	6.077706522	6.23372382	6.252119792	6.131430991	6.104519721	6.09154546	6.355542969	6.116666887	6.304645703	6.211266545	6.305559659	6.29200942	6.116008157	6.200836639	6.041376092	5.934161642	6.081082714	6.14073544	6.717059884	6.416196488
10281	5.353891306	5.485914634	5.680154172	5.390363677	5.495526186	5.622265158	5.329564089	5.549438657	5.410038689	5.401676156	5.471204249	5.604127523	5.688358527	5.410203268	5.600982212	5.857167128	5.575835155	5.509755388	5.48116085	5.421599837	5.590298855	5.346342921	5.65286211	5.65662536	5.731249473	5.542827952	5.468236582	5.940452532	5.592687536	5.51866415	5.344198352	5.068647498	5.682723859	5.703041776	5.805989027	5.450453897	5.59433369	5.770462646	5.430929375	5.629157938	5.53866559	5.675902291	5.811341224	5.667765202	6.216942296	6.234613751	6.087173167	6.223756254	6.103300564
10282	8.180184993	8.074727526	7.932926248	7.836326037	8.05516833	8.112826996	8.121287275	7.922424629	7.817246284	7.816845833	8.032817531	8.067112449	7.726855291	8.170661607	8.183405731	7.755413343	7.938592105	7.783915697	8.31010363	7.859605427	7.950647982	7.939205948	8.204802756	7.898601213	7.637799387	7.937470458	7.99124302	7.630005864	7.759788999	7.848899874	8.095147335	8.120087922	7.6343644	7.775568952	7.667420173	7.945408405	7.715464386	7.309241959	7.717026629	7.903618666	7.947886183	7.919069191	7.670930349	7.495179662	7.390109301	6.820416215	7.339603444	9.291837354	9.248471942
10284	8.829038666	9.159718229	9.102409203	9.000947727	9.219950703	8.98039664	8.546851162	8.787239221	8.864429564	8.96184161	8.651181058	8.818905931	8.626339802	9.072939651	8.89494777	8.872642129	9.02037222	8.573253929	9.0566661	8.818037473	8.673160053	8.904326742	8.741781358	8.833155442	8.729065284	8.869829678	8.824048332	8.664843658	8.764425931	8.913438931	8.862421823	8.667473772	8.836927779	8.696809283	8.50067787	9.059055773	8.887555242	8.728738399	8.822485549	8.726996702	8.60039287	8.802881184	8.763670411	8.965763821	8.361509286	8.55621918	8.775177018	10.44253427	10.41401719
10285	7.698614984	7.508605046	7.234350785	6.948821563	7.141215035	7.338872644	7.431036953	7.599957693	7.824067232	7.417438926	7.234687278	7.508315937	7.290740023	7.647126706	7.449464149	7.213076417	7.819354434	7.432005166	7.714265414	7.823341592	7.642711194	7.788187621	7.778432471	7.411447871	7.322325858	7.56837369	6.605402873	7.455242966	7.466016145	7.509911837	7.074021382	7.547645432	7.425901809	7.328990579	7.074356337	7.439371796	7.547957986	7.190621418	7.50941023	6.710228291	7.39845651	7.490950074	7.436105711	7.374670995	6.85610428	6.520647847	6.753527808	8.849244762	9.094994861
10286	8.115595188	7.834312219	7.642359527	7.354732241	7.939624018	7.516451465	7.825980673	7.605280161	7.758484934	7.543307931	7.744359707	7.826042464	7.581990399	7.857079068	7.909184943	7.828349089	7.844582559	7.315531873	7.748146724	7.889226587	7.602256825	7.796929637	7.910185899	7.845842017	7.398328825	7.618576576	7.5597892	7.669918679	7.640370529	7.581307874	7.809834996	7.734404989	7.901211109	7.755393601	7.088161669	7.586634131	7.997983828	7.596076223	7.93578554	7.489697075	7.320240812	7.439970445	7.390308668	7.629897555	7.059920492	6.914617053	7.075132059	9.270889645	9.533915741
10287	5.374360283	5.403007966	5.480471871	5.639449897	5.746373719	5.574823583	5.940908154	5.650302399	5.469274591	5.686383748	5.714241158	5.448943001	5.668971954	5.430181362	5.677295642	5.383053352	5.48799521	5.822488159	5.603186227	5.807459899	5.729672167	5.522137876	5.649831597	5.424412934	5.362367261	5.620771517	5.574989688	5.52561118	5.741696537	5.439681074	5.395782446	5.769657627	5.353931276	5.700448626	5.757225262	5.478991088	5.282435168	5.344209541	5.360626419	5.712192078	5.869782994	5.532058652	5.446805267	5.607355585	5.978941191	5.80269212	5.814824818	7.657512968	7.846754852
10288	5.006018561	5.355275272	5.581782861	5.067974018	5.685509679	5.394765825	5.521461143	5.513717275	5.456886473	5.337892567	5.669916875	5.265775798	5.703814969	4.882423335	5.549580677	6.114533968	5.352112415	5.507242316	5.347605187	5.696524512	5.953496246	5.769536197	5.438173151	5.149533937	5.303288494	5.951088549	5.439047842	5.296370304	5.756787484	5.528132242	5.33014718	4.932514097	5.311337095	5.321464488	5.760378366	4.980817418	5.410285517	5.451914759	5.242094403	5.612304951	5.361134415	5.365936506	5.365395685	5.262148545	5.641428598	5.684516368	6.354616825	7.058849535	7.43578395
10289	9.893713829	9.540750827	9.31044222	9.382131941	9.607202538	9.634236694	9.482906709	9.63188449	9.854134864	9.711324622	9.274669453	9.712602723	9.518310642	9.877609214	9.404411412	9.909886579	9.94109001	9.430660815	9.753021477	9.811769977	9.412929644	9.704671052	10.28423656	9.508106749	9.512235471	9.738206146	9.312731595	9.499386717	9.751472462	9.667104086	9.943749123	9.557432808	10.63094558	9.798663382	9.090731339	9.959510838	10.05263494	10.10426333	10.43943692	9.448923524	9.423187089	9.839612861	9.5489894	9.577956264	9.040191356	8.599173971	9.285081331	10.24639302	10.24384494
1029	4.054512918	4.088646121	4.107376644	4.273572544	4.19172428	4.056400203	4.095643345	4.102609002	4.082687073	4.155893466	4.05119893	4.091131487	4.256206331	4.103774792	4.153783689	4.300142123	4.120884094	4.286159714	3.989476319	4.05158261	4.016201274	3.991481462	4.159112183	4.19200198	4.086193903	4.080967229	4.157421015	4.12291034	4.045343813	4.110604345	4.236475476	4.020419258	4.204003722	4.199526568	4.305895696	4.209711222	4.199935922	4.2900896	4.076510726	4.33819777	4.238919498	4.2294143	4.180916152	4.144170006	4.31781884	4.368654371	4.474488138	4.654141937	4.653271659
10291	6.601940831	6.652341323	6.727234713	6.955324462	6.648211379	6.736750336	6.744288126	6.775692274	6.800652234	6.709920829	6.759011387	6.715166297	6.777439429	6.980490414	6.773547957	6.980546484	6.732965446	6.714620325	6.860838006	6.743968818	6.749724263	6.755136596	6.885250802	6.699523005	7.032648421	6.757132434	6.769578888	6.765086921	6.894711436	6.549232672	6.62190594	6.810157473	6.698412156	6.863149986	6.612098762	6.92463454	6.771732786	6.808350405	6.816798887	6.665734354	6.742699641	6.80328377	6.788612404	6.774826833	6.619089902	6.764466971	6.835627962	8.601434028	8.520243389
10293	4.290395998	4.364697296	4.719318687	4.836358688	4.697016109	4.501321689	4.223767191	4.377259534	4.28806124	4.527310228	4.496268288	4.49416572	4.163569514	4.634287193	4.364238253	4.782487755	4.182376997	4.425389373	4.146828995	4.483193954	4.690670872	4.410581204	4.423417476	4.242573375	4.285283666	4.41207893	4.413918168	4.289378664	4.441691764	4.273120435	4.447705907	4.188534686	4.569202871	4.659345584	4.564151818	4.566520324	4.419181103	4.613528681	4.600449656	4.631854666	4.630436828	4.439547223	4.649169006	4.599420861	4.637005234	4.6074409	4.856492059	5.176322029	4.823861804
10294	8.186125992	7.899570134	7.869435721	7.433312337	7.448435769	7.946568496	7.918771518	8.238261686	7.955188967	7.675162877	7.746476317	7.859219044	7.556305557	7.936274357	7.852047258	7.606243265	8.05463682	7.762130072	7.919721656	7.887543393	7.68055407	7.955197192	7.760267753	7.87282888	7.814669436	8.044064865	7.641993397	7.930254133	7.970240521	7.988816022	7.742812159	8.164355552	8.104504715	8.161636456	7.754546852	8.0888677	8.026139818	7.942577245	8.408382892	7.535181275	7.866921877	7.862449814	7.790318762	7.845123625	7.086986163	7.112430609	7.521366188	8.6423855	8.878111214
10295	6.334091022	6.376599468	6.440852522	6.358227804	6.621218125	6.735607736	6.387062615	6.511933402	6.708016455	6.472233703	6.752342536	6.642726733	6.306162914	6.757393397	6.699339588	6.708958884	6.410405928	6.225709031	6.348517375	6.311847904	6.534439029	6.489859401	6.695474742	6.509498253	6.305518615	6.539588832	6.393592186	6.2354265	6.45301668	6.338936898	6.425773704	6.386060079	6.322101543	6.127761896	6.642316258	6.576019213	6.353042006	6.616793262	6.5969192	6.564092108	6.590038551	6.423459719	6.554134975	6.39641127	6.06052376	6.550243187	6.522480235	7.704279236	7.627263161
10296	8.739371253	8.722538592	8.359910913	8.561980467	8.460380224	8.544309076	8.307149647	8.331956371	8.304190478	8.341510765	8.106336877	8.252289962	8.059690436	8.434028009	8.426011782	8.078156099	8.228381505	8.159103008	8.547834832	8.270808695	8.391368723	8.542581384	8.288850533	8.211420535	8.151373417	8.341378424	8.2749478	8.524716487	8.454315813	8.119297824	8.39263494	8.855065035	8.233404666	8.310208659	7.91198847	8.511655535	8.552563521	8.051443773	8.365439689	8.478308732	8.284302471	8.201888895	8.176895349	8.157649757	7.993599202	7.615822576	7.947038908	9.914304577	9.88196585
10297	4.623197667	4.605218298	4.852461378	4.612784127	4.458275486	4.550092599	4.519289291	4.605848813	4.540433983	4.619320669	4.763513761	4.50790414	4.672582309	4.552864261	4.518826609	4.725218206	4.50363241	4.572979139	4.375170251	4.345839761	4.547340203	4.497506401	4.47670315	4.608925433	4.702637666	4.427337833	4.621524305	4.6061908	4.364062781	4.610776056	4.64609763	4.336251074	4.639246147	4.735182859	4.760017995	4.599108378	4.631506702	4.833831268	4.546028746	4.559977217	4.752609696	4.574947629	4.842797187	4.564586971	4.984648092	4.812437951	5.004439654	5.058135585	5.041341019
10298	7.767551011	7.871905133	8.061042983	7.955836227	7.792458772	8.143776154	7.619301409	8.171917814	7.741961511	8.113516417	8.000140255	8.114677391	8.166554942	7.865743969	7.945588446	8.309782039	7.959385681	8.073577919	7.722699864	7.62409905	7.8876768	7.861744975	8.091973775	7.956154917	8.174658862	7.684460423	7.780980439	8.008146701	7.942827256	8.026658551	8.14983717	7.81400604	8.147091681	8.202892107	8.25880472	8.08462405	8.14865181	8.122288593	7.994033597	8.306371099	8.165505081	8.218032151	8.188340181	8.078834771	8.337338656	8.269484557	8.317842686	7.661827646	7.523484362
10299	7.773742062	7.638029702	7.666420621	7.56558784	7.074168553	7.984366726	7.321411092	7.684050508	7.597139289	7.565461322	7.108866856	7.369262748	7.824337527	7.692888605	7.54774748	7.238437405	7.936947907	7.77573295	7.793654631	7.739776859	7.519141891	7.700101489	7.067799736	7.762940522	7.710630373	7.612448382	7.663697671	7.247725584	7.688285098	7.528390541	7.694276237	7.845754519	7.680529793	7.882133306	7.639474587	7.874577506	7.827921367	7.152556958	7.795177125	7.790533632	7.418815826	7.889200344	7.59010923	7.946701738	7.471604631	7.240520607	7.382427841	8.319707566	8.503525192
103	9.543597236	9.675220233	9.320700802	9.529691663	9.395348123	9.639615392	9.676793413	9.958316473	9.813280699	9.737560245	9.834273852	9.490722845	9.302641969	9.232800002	9.18483822	9.367982213	9.370244851	9.208195436	9.930629932	10.06071221	10.11811506	10.33813761	9.753154436	10.03537986	9.771664283	9.88780952	9.739361216	10.00696682	9.586923567	10.27372115	9.551269084	9.774013615	8.832848417	8.95379743	8.119814555	9.051997371	9.139221538	9.141751873	9.151270184	8.957028364	9.207083773	9.000218313	9.148332091	9.044246218	8.807007803	8.555181852	8.845437689	11.89472116	11.92470188
1030	4.038066009	3.725232959	4.152960782	4.219942134	3.868810006	3.813019454	3.939730921	3.779940966	4.004616457	3.963367957	3.982454627	3.890762544	4.032536639	4.017070979	3.576423869	4.073452455	4.196684342	4.066382881	3.838312579	3.716010235	4.004169444	3.770696052	3.914878872	4.043217868	3.90619686	3.728141886	4.143798683	3.873832424	3.682126739	3.918871295	4.495221252	3.803465689	4.075065254	4.043000735	4.00886219	4.267740021	4.244857229	4.010277337	3.795464031	4.073558257	4.268958974	4.132709611	3.91182462	4.064410814	4.226944355	4.52259317	4.4272648	4.358386979	4.401484849
10300	5.72638785	5.760337201	5.557758305	5.74185798	5.831841928	5.843916473	5.817354403	5.663779968	5.664265629	5.902617948	6.19207603	5.766647898	5.787326333	5.987112399	5.83842067	5.934313424	5.72845728	5.674150716	5.771848704	5.647464484	5.845782397	5.839885892	6.013171651	5.812254287	5.680124636	5.647193658	5.940951005	5.691578986	5.779834066	5.734053315	5.909601422	5.85393587	5.563481178	5.906861084	5.814347617	5.866494715	5.776475804	5.644063746	5.77110977	6.045390361	5.900431555	5.774988561	5.758831222	5.730244865	5.748414823	5.866944398	5.942605669	6.796757729	6.581108901
10301	7.443742939	7.564364233	7.542496034	7.7781739	7.110971598	7.523811719	6.817116028	7.249032903	6.998184886	7.031772331	6.913948377	7.255077774	7.020037802	7.372694783	7.124951058	7.786505611	7.517946662	6.75434681	7.482466762	6.97635211	7.002904233	7.109980557	7.67576363	7.220809001	7.431208813	6.717179481	6.945638165	6.843646647	7.220270918	7.267010973	7.267726278	6.877164072	7.483847654	7.666535404	7.238109623	7.6537603	7.592338137	7.852285529	7.497405903	7.360612437	7.852529601	7.911777632	7.444062662	7.306515284	7.357390499	6.928909808	7.28704365	6.065954127	5.86133764
10302	4.250282712	4.392007662	4.326461976	4.425124701	3.98599762	4.062096413	4.175432141	4.385546514	4.126875728	4.229916018	4.217917286	4.162941077	4.134838898	3.881879769	3.981336639	4.176202337	4.159488022	4.145172146	4.173358964	4.100493595	3.972124133	4.136931623	4.270882168	4.151078081	4.35299236	3.996560448	3.849010379	3.998778486	4.113187319	4.119690363	4.559204876	4.219168916	4.135741592	4.334878615	4.46847491	4.142071534	4.10562712	4.175905429	4.255689078	4.361358591	4.016053954	4.140157666	4.030379207	4.161303191	3.981572639	4.170146721	4.069110048	4.760343492	4.631234769
10307	5.811204328	6.075236689	6.095957945	6.434988603	6.38568445	6.137462287	6.177772454	6.185879439	5.808815476	6.272329949	6.304828534	6.059753444	6.340105857	6.0732159	6.047110983	6.367160339	6.148344932	6.2033482	5.789977697	5.94969252	6.121606876	5.833463851	6.469037494	6.094532643	6.300271905	5.952908926	6.269264376	6.177288137	6.110310014	6.070972523	6.009128197	5.856572425	6.254120333	6.312028773	6.437614316	6.10986736	6.156894647	6.507931795	5.966753709	6.521536372	6.307217152	6.15854061	6.28315396	6.025034807	6.607808453	6.86390612	6.522600038	7.408343806	7.235874901
10308	4.544198321	4.661820022	4.371486695	4.681736617	4.393278588	4.287045936	5.003853838	4.518566164	4.58530817	4.558972151	4.577529518	4.381542484	4.579495979	4.476083302	4.643411895	4.196625749	4.620328577	4.660581502	5.083833842	5.260433616	4.640173482	5.213695084	4.533007694	4.408242964	4.423459691	4.597825726	4.592661617	4.162983193	4.533349193	4.544259469	4.355280363	4.611289642	4.539392568	5.019342482	4.362216954	4.661881699	4.457184536	4.493303526	4.620173004	4.473537679	4.636827091	4.193970804	4.068833332	4.316638782	3.985605848	3.86229439	4.325511609	6.109827545	6.81437516
10309	4.101693925	3.865854317	4.243802798	3.811000238	4.228805146	4.235769576	4.094789429	4.191719992	4.179312133	4.187728906	4.363466742	4.129142277	4.009607218	4.057313649	4.191148141	4.39210863	3.7225606	4.006320384	3.970623846	4.060406988	4.042049801	3.965080588	3.979950639	4.153388743	4.330213763	4.25084972	4.363997496	4.388805336	4.231488305	4.318693215	4.049214425	4.077639009	3.980924329	4.304773945	4.197921306	3.852855472	4.08244537	4.127532301	3.990794766	4.371747095	4.085644572	4.07687173	4.214838297	4.22796436	4.257076916	4.416213537	4.409025106	4.644604157	4.394044187
1031	6.580287923	6.722763324	6.594434744	6.598372087	6.396382045	6.271653005	6.380458146	6.289629717	6.148073819	6.70956195	6.244736507	6.100315288	6.491839778	6.609906465	6.288885635	6.823958715	6.550343537	6.302579102	6.377874639	6.507758033	6.340509425	5.843281947	6.512996712	6.356830196	6.320925007	6.133593312	6.206146223	6.211071452	6.112637144	6.330627137	6.740448299	6.396790865	6.438143838	6.425568945	6.689716799	6.472484654	6.626977179	6.502379635	6.545179487	6.596007129	6.651854422	6.41778989	6.47964701	6.508733192	6.774010494	6.365837261	6.57856173	6.935649301	7.007050728
10311	6.221070216	6.312840587	6.204116541	6.014726468	6.03540212	6.120967623	5.759184546	6.026040126	5.976149685	6.234693769	6.063423856	6.101364386	5.704282513	6.292862585	6.115234421	6.182389306	6.245144414	5.883822353	6.308826903	6.065499235	6.010664025	6.436671695	6.110566243	6.226853416	6.016683266	6.435173768	6.339224842	6.050674499	6.052791817	6.090026641	6.268958529	6.414435135	6.372278566	6.28448241	6.389644707	6.354093594	6.297388654	6.224898846	6.602553616	6.104859433	6.238425849	6.251787369	6.411748068	6.112696063	6.051174833	6.088822829	5.878756071	6.962408948	6.818722656
10312	4.822994548	4.866433098	5.278335807	4.742178929	5.106019756	4.645099686	5.056598215	4.701334525	5.133330988	4.96172119	5.41437336	4.58705618	4.837873963	4.84405799	4.906257673	4.978351349	4.898635011	4.766828652	4.553198373	5.577774789	5.261190038	5.042250938	5.13827823	4.758198839	4.957458604	5.449563303	4.973872664	4.914042759	4.821476751	5.047372062	4.558314833	5.261190038	4.761963347	4.893280724	4.995053046	4.699614304	4.581660032	4.954272747	4.761691063	4.864809036	5.121739698	4.668687072	4.789233982	4.847018703	4.934068864	5.039308558	4.641947951	8.274798418	8.475735757
10313	9.488049539	9.3035356	9.093084985	9.345833418	8.671636255	8.830443296	9.511578846	9.07211517	9.153471328	9.310535892	9.197614281	9.555622733	9.452272447	9.259682853	9.214071769	8.732839265	9.114471956	9.429183799	9.303666671	9.245362935	9.40499989	9.121308489	9.189832122	9.433074848	9.386733809	9.343308634	9.623289014	9.41790664	9.089323486	9.115783695	9.193788895	9.730068457	8.951784827	9.069834875	8.630774336	9.01810485	9.208805866	9.178245423	9.218651055	8.763735928	9.128183175	8.91597188	9.063466769	9.029856797	8.968504895	8.57672773	8.865653488	10.99189878	10.78992958
10314	7.55100742	7.875490407	7.711091351	7.768177816	7.22926216	7.631460963	7.358686841	7.439201873	7.463244402	7.729216656	7.606006127	7.797674908	7.557117299	7.635700281	7.650013812	7.461048299	7.739037211	7.684286977	7.841466167	7.690849223	7.720315778	7.937667884	7.498312908	7.746570272	7.800073539	8.028549303	7.619894314	7.812126631	7.827987139	7.687734053	7.687155698	7.818032904	7.62766623	7.624169165	7.001108792	7.700622849	7.657280555	7.581584386	7.729575984	7.223074077	7.558213964	7.664935064	7.62942218	7.663836418	7.466144888	7.334711936	7.551322059	9.650298362	9.516022871
10316	4.059762091	3.996966009	4.879044715	4.39529861	4.441262094	4.179432863	4.067674911	4.150824102	4.135446501	4.150577529	4.218834087	4.147288798	4.151955304	4.175822445	4.222185906	3.951082027	4.056961212	4.249679208	4.180763481	4.052714633	4.250047984	4.016733964	4.225990449	4.155751424	4.217303799	4.310064978	4.290782807	4.107948052	4.276355495	4.163778617	4.0643124	3.845829943	4.050746815	4.323200281	4.414473737	4.198054326	3.963664601	4.360633316	4.049268928	4.096614443	4.198164698	4.182449053	4.353437297	4.263139826	4.338354257	4.541611592	4.459180498	4.825305	4.667421848
10317	4.047613163	3.930009625	4.219187579	4.092262901	4.065740171	4.102449974	3.931700973	4.033603193	3.960571884	3.892559579	4.021465811	3.993734172	4.055239543	3.87817514	3.92863607	4.231498955	4.011612226	4.150875332	3.851345605	3.909652827	3.910716343	3.966888222	3.961187485	4.097303415	4.13281977	4.002449595	4.047600441	4.144829531	4.005381816	3.956142865	3.908826985	3.949616923	4.163543801	4.047090778	4.287002688	3.89629843	4.087104413	3.955406016	3.892152327	4.186238948	4.043918564	4.022489199	4.027512078	4.186412624	4.293639274	4.310698726	4.118115447	4.718915808	4.620164554
10318	8.1340821	7.754166408	7.248406785	7.777363384	7.626479855	7.704268503	7.691028388	7.919754025	7.836443201	7.508511107	7.928161666	7.86183573	7.951164543	7.499706261	7.556443572	7.870917243	7.804379384	7.565222941	7.734660293	7.691326608	7.574476	7.810687845	7.888026258	7.698788927	7.569625315	7.684500985	7.788729902	8.020121096	7.864139647	7.916438329	7.78568191	8.152712845	7.500446454	7.595061315	7.450241923	7.682004967	7.704233309	7.346186906	7.627766691	7.825077642	7.910975964	7.493254084	7.554555003	7.818195344	7.505125976	7.235191493	7.565014666	9.048295536	9.255562356
10319	5.073351017	5.122720115	5.634167046	5.940341729	5.438001786	5.333898528	5.171884326	5.331740787	5.183475416	5.54962279	5.171832066	5.218521678	5.667032421	5.295346528	5.554724173	5.811010723	5.225237566	5.382417623	5.169975579	6.189766706	5.055092393	5.00883484	5.506420329	5.316719453	5.528635674	5.521312527	5.233650874	5.611360857	5.228129113	5.329881881	5.46496668	5.16537655	5.404785176	5.52914295	5.645754729	5.18903136	5.498449411	5.735747109	5.201161817	5.800231976	5.563859513	5.35899186	5.47955526	5.534542093	5.687845394	5.835597088	6.09963999	5.599517864	5.385879901
1032	5.450546013	5.690856933	5.906200253	5.883013105	5.657332223	5.59111163	5.391836852	5.555237489	5.27836752	5.835410969	5.57158286	5.617158879	5.70806175	5.552544707	5.777669914	5.834190629	5.545021732	5.850236518	5.520295139	5.560034458	5.356094105	5.149806846	5.971657972	5.732876352	5.529859452	5.193474025	5.716898492	5.478781106	5.433081882	5.438576577	6.295918553	5.55294702	5.817313753	5.957158399	5.773856956	5.70242744	5.701092807	5.864262959	5.663179928	5.949261771	5.7804106	5.677332568	5.867936628	5.75487341	5.889929906	6.483675634	6.125702994	6.446227926	6.215978293
10320	4.064506864	3.98843158	4.331092298	4.140268163	4.117297141	4.137795811	4.311338512	4.154539004	4.116759921	4.309272887	4.16380975	4.138576174	4.221616678	4.135988308	4.220395894	4.218807094	4.175668828	4.271033277	4.125737534	4.314741388	4.27565837	4.052540334	4.113157131	4.102481371	4.293611104	4.010333895	4.159754955	4.37743274	4.163481782	4.207681915	4.166156098	3.950579669	4.249300925	4.261665559	4.516706837	4.128085263	4.152583093	4.28668652	4.110422272	4.262455308	4.272845398	4.205934341	4.298506945	4.159471474	4.338360018	4.616536425	4.328291152	4.851039501	4.916506741
10321	3.564629412	3.481148822	3.553709996	3.876484446	3.530714495	3.633246667	3.521911849	3.476140926	3.587329333	3.789700547	3.574530824	3.550594897	3.598903234	3.644842558	3.50176609	3.651338662	3.60378104	3.656531438	3.518370202	3.600583413	3.520054648	3.58303482	3.532289533	3.552619211	3.584098124	3.584599478	3.691798486	3.736382912	3.49987519	3.492764251	3.660863	3.634245533	3.66659783	3.644476361	3.664166546	3.803144119	3.622663159	3.545291163	3.671652748	3.770457963	3.657596292	3.670889565	3.450483276	3.715470563	3.629857148	3.708864488	3.611577362	4.205187695	4.091601112
10322	6.742799275	6.66027823	7.118207562	6.617853095	7.092884756	7.133359442	6.919877555	6.942079018	6.784323334	7.083205566	6.979944969	6.973669685	7.165408255	6.907744489	7.046514041	7.260965609	7.05008544	7.14442874	6.722740933	6.731582944	6.917454484	6.718587096	7.087261174	7.006097902	7.289069228	6.653293388	6.670426015	6.760898178	6.691600647	7.001071237	6.961529957	6.769802414	7.137511481	7.183183617	7.31398759	6.733895993	6.89945772	7.209846223	6.918161642	7.226353338	6.955702973	7.090467843	7.255964851	7.170754115	7.15615972	7.356898563	7.263679097	6.707304844	6.678033527
10324	3.595231597	3.411825553	3.541869907	3.537859115	3.546336329	3.559226567	3.436425162	3.645048022	3.545591647	3.547022039	3.468668455	3.497977792	3.376323617	3.470594332	3.436386997	3.824085693	3.584164482	3.413250625	3.416855388	3.542471342	3.410719441	3.377957679	3.541128535	3.446687036	3.603706735	3.632742615	3.760371286	3.633407533	3.55928373	3.538733791	3.599949256	3.512441486	3.502823122	3.626058357	3.476358874	3.4756024	3.539247874	3.597316785	3.544048087	3.497022912	3.506025891	3.543245229	3.520237737	3.584241572	3.760921402	3.45134874	3.769225567	4.047760616	3.989659554
10325	5.620599192	5.523975559	5.438907935	5.399007965	5.23273927	5.804107915	5.579628396	5.616233946	5.630239227	5.568454178	5.518596447	5.684655877	5.656930024	5.702947233	5.645982618	5.392543749	5.849292187	5.967014407	5.753481494	5.612488108	5.793938277	5.809334297	5.560386132	5.70236622	5.892228072	5.734764074	5.810666794	5.34990512	5.794837729	5.761043157	5.330032209	5.696270611	5.700629269	5.740675456	5.710181666	5.832907061	5.77784848	5.437622107	5.627392284	5.579725329	5.141808303	5.897517372	5.734729508	5.520476206	5.406740707	5.713411121	5.53637841	8.055221793	8.222108592
10326	3.98473451	3.901569602	4.036442994	4.130073287	3.918503949	4.032073259	4.02409359	3.949575241	3.949373228	3.893208693	3.909974984	3.99478993	4.047217221	3.944408118	4.027928342	4.008665766	3.872024713	4.052822757	4.056624066	4.044898718	4.064891678	3.969651413	3.988794298	4.058522052	4.005024212	4.041059058	4.130240438	4.139582218	4.163137562	4.120835653	3.920137658	3.833177115	4.017526536	4.092449806	4.01485909	4.048043024	4.058323316	3.996471576	4.050016017	4.062456481	3.861131183	3.921134142	3.899803546	4.075952414	4.294818066	4.414003287	4.339043327	4.864461111	5.037524376
10327	12.00412464	11.9451983	11.98807279	12.02843391	11.99558625	11.91685693	11.09371642	11.82017752	11.57803764	11.94720632	11.60147303	11.98027578	11.5085818	12.05076412	11.66169383	12.06994042	12.11645144	11.58473394	11.82702264	11.2478451	11.47248275	11.59748802	11.83561936	11.78655998	11.81737747	11.61469887	11.70470436	11.26137479	11.70426212	11.49882996	12.02368752	11.71391275	12.09930747	12.22126804	11.48562924	12.11367503	12.13581604	11.95558173	12.1537249	12.13435942	11.49961302	11.9942932	12.04207747	11.94873665	11.91053333	12.04726988	11.81469337	10.9656193	11.37717367
10328	7.771448017	7.790774776	7.617746363	7.684196582	7.877241461	7.488845245	8.045199717	7.531032787	7.753359203	7.602034361	7.982452985	7.646271071	7.513769796	8.032896552	7.735660791	7.38699185	7.76022357	7.689170233	7.904439073	7.798500682	7.813888009	7.915603015	7.739143583	7.628345587	7.66572392	8.02809572	8.102881571	7.800304788	7.722654872	7.506876785	7.656999706	8.029840293	7.82209066	7.619661982	7.626265833	7.522216368	7.72842266	7.732907979	7.731878322	7.715847673	8.184221817	7.563400524	7.671924949	7.65411284	7.407461637	7.68016665	7.589069246	8.904064531	8.941062706
10329	7.918773468	7.747194497	7.921043514	7.799701442	8.225363554	7.942490564	8.113562314	7.826063513	8.107080645	7.952983508	8.014671175	7.913142646	7.841219624	8.161478681	8.141604632	7.756024643	7.894993174	7.925260036	8.028590963	7.961270869	8.044664885	7.956309604	8.373439146	8.109569391	8.179545913	7.959723731	8.287295189	8.1483471	8.121653529	7.985540679	7.899741886	8.051869433	7.83143467	8.059343075	7.993481509	8.215141582	7.95210649	7.937810892	7.835708773	8.103982353	7.66238603	8.164166129	7.633141899	7.797554841	7.766811725	7.649369672	7.877864738	8.986330483	8.779245461
1033	4.574534939	4.311393939	4.699420941	4.187050123	4.400952309	4.417275359	4.940790423	4.432210658	4.513846893	4.449513537	5.412263273	4.557585749	4.423732403	4.767709577	4.42497289	5.028204133	4.546730947	4.533024802	4.446946382	4.367346178	4.909380499	4.223255847	4.496080202	4.495508909	4.367086237	4.669033939	4.561343274	4.609991856	4.375225194	4.376453546	4.280629967	5.380823294	4.434603804	4.568408589	4.653433093	4.167320732	4.383520483	4.54861401	4.495081502	4.606414851	4.433990648	4.459770096	4.460161889	4.54659906	4.525681099	4.651208657	4.452718281	5.052422344	5.046250773
10330	9.338570943	9.019213026	9.106234193	8.975938876	9.151309797	8.984850723	9.176925798	9.035740874	9.084966498	9.089674874	8.924477942	9.149404845	8.910423556	9.224544227	9.058918583	8.894326915	9.128712467	8.790858891	8.956761304	9.029253006	8.982871368	9.168840854	9.036581235	8.9659979	8.629717177	8.91424151	8.711509717	8.855552132	9.016924045	8.892990918	9.065018612	9.357231797	8.869430762	8.89678956	8.958621541	9.065040407	8.918549428	8.797102053	8.985336054	8.667733303	8.964862043	8.792439203	8.648587965	8.798491425	8.560402039	8.334526199	8.615923582	9.264245922	9.113328419
10331	6.404663812	6.208823106	6.694247375	6.395799337	6.387393356	6.613903799	6.10563853	6.881790727	5.991875238	6.669004851	6.380539426	6.660365725	6.708205808	6.443953577	6.535975729	6.896136638	6.478225898	6.749733202	6.356624966	6.400635851	6.106258751	6.362667796	6.494753991	6.646346795	6.671838163	6.066769751	6.473832352	6.743324976	6.532990357	6.425833374	6.608983488	6.397601657	6.614721233	6.658010477	6.995196245	6.383339341	6.582638831	6.689963733	6.375357825	6.645616017	6.847861637	6.692972298	6.694017339	6.671992331	6.597993448	7.10569192	6.635039703	6.30276279	6.597750458
10332	4.574635462	4.806765106	4.750880279	4.719172808	4.730340486	4.779275572	4.582004099	4.634440294	4.554842545	4.804936629	4.678418255	4.781777159	4.828573805	4.733043665	4.678817864	4.923112338	4.749286718	4.937027533	4.695432223	4.526314666	4.637303368	4.661916182	4.752817605	4.853091533	4.820357374	4.58904364	4.818998711	4.77565247	4.702287257	4.577417398	4.863468627	4.560840748	5.022826269	4.958553844	4.98896404	4.990937567	4.826190966	5.042069455	4.786896311	5.101387858	4.8633794	4.886358645	4.918843571	4.923151514	5.257423383	5.362886058	5.024096017	5.45057239	5.526258282
10333	4.18085791	4.51179937	4.616869387	4.46547291	4.394185479	4.453004047	4.216470992	4.299591527	4.111952371	4.433130347	4.304576066	4.339342393	4.422609903	4.434663241	4.505239304	4.75706082	4.183350603	4.537161171	4.130956207	4.299639599	4.243818885	4.314166747	4.369246079	4.364059428	4.30297968	4.40077417	4.264440235	4.463180717	4.377677093	4.425643118	4.350043708	4.214374939	4.463404678	4.378149761	4.669085696	4.570964571	4.307570083	4.513195545	4.555596552	4.520618243	4.548025609	4.495824455	4.350141336	4.370713659	4.737235853	4.950020962	4.564747262	4.95638951	5.038490173
10336	5.143740529	5.09760603	5.083722589	5.442718608	5.23913918	5.248403643	5.339320026	5.196423084	5.420814672	5.109346343	5.386666787	5.073476171	5.183684661	5.082168165	5.150314171	5.272487504	5.188328145	5.171370197	4.972924664	5.097942054	5.05546729	5.287472021	5.256333357	5.108380634	5.169033174	5.236297477	5.361889501	5.18460202	5.133243895	4.96914441	5.171862217	5.042330697	5.092316486	5.110345715	5.259873374	5.247775123	5.120397571	5.411694036	5.040011465	5.165244015	5.141242494	5.254283704	5.184957381	5.184659796	5.234093866	5.092963195	5.236734517	6.660376123	6.258534696
10342	9.293449852	9.311203101	9.227220766	9.425258146	9.401929139	9.171012711	9.520554774	9.136627005	9.340885401	9.293867925	9.182515674	9.410435976	9.202853294	9.377592849	9.364078036	8.90537246	9.233395937	9.172577778	9.134905626	9.213875344	9.363223223	9.241682184	9.021508674	9.248760751	9.129301628	9.581739251	9.293712033	9.322604906	9.177249836	9.187423059	9.178706908	9.422545849	9.231735683	9.044289987	9.504634888	9.070875161	9.04314538	9.142434983	9.057546757	9.064603897	9.547902732	9.115687416	8.948168416	9.020992783	8.835737901	8.742226768	8.75874464	10.57200518	10.63094452
10343	4.431310232	4.648244479	4.452218379	4.513984594	4.653984298	4.620908428	4.423332164	4.610837607	4.347104206	4.658370511	4.526258072	4.529402659	4.498048442	4.730353919	4.760768793	4.960323442	4.389648001	4.749221111	4.406861532	4.626835517	4.55765966	4.610382876	4.418122003	4.70555265	4.708454947	4.442892632	4.452131752	4.619601317	4.390922803	4.464677335	4.654848272	4.269086077	4.65134445	4.704717385	4.80318471	4.640310472	4.622820344	4.803924764	4.426950626	4.851489477	4.59115335	4.653816684	4.612179594	4.670078719	5.137566983	4.86326194	5.100430387	5.426701542	5.509554977
10346	7.800892104	8.217856199	7.017626276	8.083741249	7.985689516	7.313866789	9.203420702	8.707282686	9.060706422	8.615333708	9.588556339	7.606285128	8.062946971	7.365785026	7.217353154	6.569670589	7.283831069	8.588368992	8.968503929	9.848041716	9.759184604	9.462689991	9.112973967	8.832550449	8.028917656	9.253959393	7.344820228	9.560242822	8.415448024	9.827649622	7.624463679	8.700590784	6.159877613	6.048187752	6.203567017	5.929478721	6.775984987	6.16854361	6.738064292	7.093044413	6.46080145	6.288145784	6.399641256	6.382709405	6.171115024	6.212580903	5.909949539	11.17884676	11.2296996
10347	5.159374069	5.038334634	5.857543628	5.360178073	5.193348443	5.038051551	5.311179236	5.089530959	5.329245224	5.239147553	5.193775739	5.135795547	5.346033687	5.174088809	5.255691943	5.469222139	5.410924449	5.196865082	5.192441296	5.10487573	5.0685187	4.99603097	5.242176842	5.180298532	5.184064355	5.021336524	5.342379854	5.384993542	5.280623973	5.224977987	5.441280474	5.2768695	5.27727951	5.361874875	5.290391467	5.346898403	5.190008986	5.44987016	5.045679937	5.450723112	5.493400551	5.320997565	5.327257861	5.111003472	5.503598877	6.116469108	5.567921729	5.710457948	5.5489414
10351	6.240306399	6.19547195	6.161949838	7.13775304	7.243444787	6.868043057	7.507584879	7.292456568	6.9157452	6.393339471	6.266409428	5.891270455	6.822319219	5.885107698	6.187202712	6.735364502	6.755322721	7.1542226	6.997615528	9.346056874	6.864756323	6.638039006	6.653388512	6.445564157	7.330147336	6.345055391	5.793576608	6.476057884	7.094941397	5.865020583	6.058318189	5.774369841	6.15368905	6.319099595	5.324158303	6.491403683	7.27800757	6.427619485	6.721692921	6.475658725	6.210152444	6.408718403	6.818963896	6.756065046	6.522749349	6.140161648	6.323747647	4.217987461	4.213594217
10352	5.98488852	5.901025438	5.511885265	6.078050569	5.936802269	5.379003632	6.100746257	5.66862032	5.757244293	5.301851331	5.677031394	6.24774642	5.618307482	6.003209951	5.76410332	5.841069198	5.909500332	5.556665307	5.488987874	5.882617716	5.616302759	5.943750891	5.350193972	5.47453299	5.096007439	5.481663404	5.44768327	5.248934395	5.566652087	5.66291662	5.525290964	5.669951591	5.451321246	5.149030219	5.730482685	5.744985818	5.763078755	5.430643529	5.568631191	5.043320825	5.349928887	5.320840424	5.026165889	5.262946498	4.923798496	5.655922448	5.130409872	5.815705886	5.764481409
1036	4.236017852	3.978678166	3.827811058	4.852729506	4.283078975	4.388564467	4.263422964	3.945074811	4.095586625	4.312009032	4.084678889	3.882147888	3.997105871	4.862356111	4.132944741	4.088982848	4.542907155	4.610425504	4.32019427	4.339694405	3.945921403	4.651115496	4.252315898	3.950963735	5.372429756	3.92509626	4.712114448	4.494195753	4.009562588	4.067895781	4.462283436	4.733436772	3.934632197	4.037681018	4.05785007	4.396487957	4.540266912	4.005131199	4.450910735	4.321934254	4.034125631	4.150926388	4.016569146	4.321426348	4.163141707	4.696096962	4.412727318	5.417781362	5.365726176
10360	6.378714109	6.428292269	6.242883249	6.301252584	6.504868442	6.234072363	6.456714996	6.313846683	6.074427429	6.276435091	6.124832834	6.199848309	6.094538159	6.32625861	6.247370441	6.445147247	6.531398155	6.822093212	6.62303079	6.236449098	6.620091868	6.376283311	6.508547519	6.327283088	6.295440093	5.960623993	6.772917295	6.281142543	6.500395822	6.359218446	6.912062266	6.38368053	6.518071835	6.462671822	6.446688074	6.416096927	6.591858292	6.369813003	6.417850411	6.722184586	6.600560374	6.51821151	6.398829338	6.38776274	6.555340512	6.671448009	6.571186813	5.892944679	6.239054622
10362	7.707298519	7.484914388	7.649130583	7.827364455	7.691123868	7.599610244	7.909232834	7.511472395	7.633229994	7.81294864	7.861522369	7.64975558	7.374002566	7.860166717	7.427687886	7.659725717	7.656163207	7.349800335	7.64913469	7.284568449	7.663960238	7.692261133	7.749367329	7.523700228	7.679460984	7.553787295	7.719415721	7.391851591	7.600331144	7.465349554	7.672747302	7.887773455	7.49774908	7.46342479	7.335395425	7.683594371	7.642485105	7.778326845	7.75615894	7.701210799	8.031782684	7.71342481	7.621805733	7.466887173	7.207872881	7.333941006	7.41547857	8.124641361	7.656905996
10363	6.203901466	6.135397477	6.100764588	6.294043907	6.249164056	6.283314157	6.651663358	6.354685368	6.194489165	6.315798773	6.395832193	6.284365426	6.006004067	6.325775286	6.081395198	5.865969646	6.432566148	6.108039047	6.522741831	6.266801763	6.544301056	6.682871028	6.352632815	6.227309762	6.44784971	6.408665682	6.008476235	6.359485287	6.351249847	6.425018937	6.235036595	6.744592291	6.123526376	6.224673221	6.106790115	6.142093653	6.237145501	6.057990516	6.132452749	6.057583889	6.000743188	6.171840784	5.885248308	5.989198238	5.401855756	5.52763425	5.643115712	8.951462745	8.941748764
10365	5.768166974	5.420965007	5.788105519	5.740936487	5.664151724	5.338615058	6.599605144	5.814651137	6.193084771	5.946264962	5.712198569	6.424533049	6.744220082	5.900246588	5.590542115	5.780526238	5.833931763	5.957135389	5.553647642	7.198609656	6.131181309	5.74441461	6.035693537	5.779908899	5.998842548	5.988217743	6.396153237	6.119964561	6.769045326	5.671601583	6.054778015	5.892918098	5.548028183	5.54985481	7.325259257	6.229939536	5.490080607	5.792840278	5.452954171	6.372967256	5.48708116	5.575309728	5.402888709	5.985362444	5.828693688	5.990980888	5.843217294	10.57876283	9.853569526
10367	7.657880551	8.027039539	8.32480242	8.193140224	8.046950189	8.644457468	7.830688324	8.141050066	7.939533639	8.470903636	8.058964078	8.190288053	7.986661653	7.846584706	8.055238808	8.66329863	8.408036291	7.784328185	8.390236689	7.460458134	7.818465982	8.305671056	8.724960569	8.246078096	8.384607949	8.138752696	8.178258573	7.83956146	8.505161436	8.47095218	8.589010752	8.157564645	9.025489978	9.004069455	7.711955377	9.062152528	8.823494895	8.763988493	8.951602418	8.679931982	7.406220521	8.634781347	8.543343894	8.644121481	8.293249093	8.603376611	8.959190657	8.393322145	8.168484886
10368	4.942094976	4.690092974	4.949815523	4.987017336	4.645244558	4.774067505	4.519051678	4.792850564	4.478781543	4.893538908	4.765925904	4.746545411	4.859454638	4.804096879	4.918359819	5.061999666	4.861045329	4.973729913	4.555996299	4.576344756	4.737320157	4.233270292	4.799913257	4.73473457	4.832072545	4.583213448	4.982651031	4.76533327	4.800034012	4.764034356	5.212963797	4.710238301	4.893378373	4.786991625	5.089326981	4.768261218	4.827818946	5.087387641	4.688168999	4.882673636	5.057600813	4.896137187	4.990675783	5.067906991	4.868885609	5.202191072	4.906968794	5.17873324	5.324891191
10369	5.420580578	5.422759416	5.798841606	5.620466269	5.409730179	5.278034172	5.210730093	5.228889111	5.361701091	5.214041215	5.459302801	5.477918746	5.493230793	5.479413241	5.377677547	5.664305705	5.404699198	5.520650053	5.194125818	5.218199367	5.337538871	4.803225553	5.500611959	5.569629355	5.352356772	5.493595798	5.519205645	5.540829705	5.395522467	5.371763529	5.409719513	5.229137384	5.429227428	5.702081535	5.570774048	5.52236063	5.708557089	5.50894092	5.388372362	5.672269483	5.550641599	5.683445146	5.60458166	5.479112339	5.678995492	5.917287777	5.694192392	5.161816393	5.237156712
10370	7.879620491	8.175081992	7.662395628	7.207799127	6.862219156	7.963946887	7.008568182	7.668126309	7.197793632	7.299507923	7.23500807	7.309513575	6.948842455	6.91606141	7.379957025	6.664622663	7.143626681	6.977116519	7.460216802	7.089569422	6.931159196	7.484318762	6.566350983	7.316670748	7.42572489	7.252156514	6.971516394	7.530584953	7.571675256	7.023320912	7.243458474	8.095191226	5.968251276	6.284754196	7.572012568	7.176870819	6.575874826	6.681514849	6.582454063	6.328819796	6.984858201	6.521351826	6.368508102	6.630957202	5.877266805	5.961487625	6.072548683	7.841119366	7.867552896
10371	4.458761461	4.57863931	4.702249618	4.795407213	4.37542494	4.567897935	4.584917656	4.480190453	4.297825088	4.483055652	4.2817144	4.702344283	4.585269176	4.539966184	4.730353904	4.940462397	4.493915549	4.632684545	4.345458804	4.348992723	4.535571185	4.284363191	4.576981949	4.675882885	4.687835851	4.427501712	4.428732708	4.635632457	4.457625731	4.412889057	4.500405701	4.236754456	4.698489	4.582184842	4.761548775	4.407502338	4.4801021	4.919515117	4.455413645	4.690396699	4.451936544	4.611973444	4.694808139	4.558777744	4.841702211	5.052489435	4.940738548	4.908784385	4.582536337
10376	10.60796914	10.28117299	10.44767964	10.39935928	10.75182715	10.52497046	11.59092496	10.54009445	11.01325194	10.6865887	11.4634518	11.17068482	10.77377288	10.99864864	10.85516259	10.1675119	10.68660267	11.32739738	10.61342872	11.71100369	11.75686852	11.17430641	10.74822623	10.50020388	10.18665914	11.31694604	10.76429245	10.95631379	10.96982731	10.70384793	10.01598042	11.42266257	10.93198678	10.60526629	12.46570284	10.6475481	10.7676512	10.31457951	10.51190645	11.13945554	10.99514595	10.48888114	10.69789631	10.72034865	10.54447428	10.1144281	10.43716196	13.61606284	13.48679972
10379	9.469527463	9.630133324	8.565420778	9.229305514	9.58055656	9.225788162	9.565964093	10.05093236	9.870596952	9.52544187	10.17296698	9.364626429	9.144285522	8.663708969	8.621877259	8.946129845	9.218811932	8.906808857	9.906434065	9.942613536	10.10209151	10.33353537	9.746130698	9.916537438	9.57825508	9.774612982	9.405099195	10.09900444	9.59760773	10.14679311	9.079189334	9.851534333	8.372181293	7.922096888	9.332165254	7.792177457	7.901919494	7.63572951	8.157177256	8.185918555	9.408006195	7.376775859	8.333577802	7.937090706	7.40437311	7.534118004	7.699110829	11.2149139	11.12365277
1038	3.456094761	3.479836606	3.732047701	3.584538685	3.611057672	3.462022333	3.440272559	3.577571784	3.51675149	3.500797336	3.463930216	3.491363881	3.45304295	3.566276227	3.41439458	3.622195882	3.481908943	3.435760973	3.543596291	3.435581341	3.463596599	3.402146722	3.462769802	3.542437699	3.392586665	3.40603921	3.607183596	3.501472292	3.469383044	3.450453197	3.615926136	3.429011512	3.451197295	3.54978106	3.535901454	3.581626714	3.493267879	3.52217188	3.496861822	3.518222214	3.560837843	3.506669274	3.420088707	3.562072588	3.513102063	3.613712862	3.611547174	4.088177136	3.905803832
10381	5.481187902	5.059948528	5.54427435	5.47561965	6.06373803	5.357625398	5.656059325	5.302742829	5.618483492	5.271589908	5.716470164	5.673222553	5.508416765	5.44352021	5.489388341	5.91510267	5.300243489	5.62891558	5.067646425	5.339639808	5.361907468	5.28972706	5.133678522	5.476686969	5.325952171	5.593716812	5.190355753	5.59306451	5.530780911	5.447521225	5.37285784	5.674600966	5.611119076	5.649399268	5.714888558	5.358501235	5.684232932	5.438630383	5.670668518	5.333927669	5.320834592	5.538776671	5.653750658	5.783121268	5.566318632	5.595476988	5.318577625	6.737177051	6.62351768
10382	5.066004706	5.216978332	5.62091559	5.245583306	5.110054897	5.442025807	4.728071464	5.438809928	5.153739004	5.231476904	5.299809765	5.186533599	5.164411971	5.065076585	5.26427301	5.64249276	4.965088191	5.341734441	5.015840721	5.07327908	5.107648278	5.00777207	5.485490504	5.191800216	5.337890597	5.426456873	5.204774135	5.51188492	5.164495208	5.297597619	4.921254243	4.996662965	5.265804347	5.425658667	5.404185891	5.372237693	5.180739533	5.539826691	5.292547233	5.586347667	5.23341959	5.363506458	5.555522956	5.39039127	5.670885913	5.77557316	5.601652616	5.075097785	5.636757231
10383	9.771389994	9.542395053	9.873386942	9.606135228	9.739820272	9.692179905	9.831736385	9.650310642	9.216724337	9.918936883	9.930182246	10.10116163	9.521395235	9.732565936	9.727824815	9.513364796	9.693838317	9.979656729	9.944316146	9.425124964	9.918110522	9.936480481	9.571808442	9.794289336	9.483716205	9.976290131	9.889312524	9.797207029	9.640310537	9.695936534	9.870358324	9.892409865	10.46352507	10.36853212	10.27017922	10.16347052	10.18463284	10.12304261	10.07409969	10.19220323	9.992526797	9.936002022	10.06459345	10.09132026	9.805151893	10.14994309	9.967970548	10.92487116	10.44999835
10384	4.387295245	4.47791112	4.177893985	4.293032784	4.320366116	4.170320647	5.157324466	4.51832577	4.635048155	4.519532704	4.706245861	4.292394346	4.266915146	4.167509332	3.997307479	4.04929153	4.421563561	4.182357113	5.074828642	4.907153681	4.996567108	5.520035787	4.370169786	4.293581667	4.175511009	5.136228841	4.796490509	4.415188663	4.523219413	4.591068879	4.242333208	4.708207049	3.918700902	3.903728949	3.94212281	4.137910121	4.126544145	4.138233041	3.991624542	3.981702798	4.042277735	4.032820524	3.998929994	4.068336317	3.970373599	4.216559213	4.08101303	9.268130174	8.596211948
10385	5.028577855	4.844210418	4.914863555	4.995092917	5.158726051	4.821618324	5.004500296	4.972598949	5.04997811	5.215449005	5.091988418	4.998940428	4.80041939	5.128031022	5.063492854	5.015001118	4.932713259	5.051340972	5.078289671	5.051718879	5.366992248	5.132537243	4.858408109	4.918953042	5.103908511	5.139132128	5.033747463	4.898020704	5.114345568	5.055588675	4.793080885	5.023230292	4.845140581	4.837907412	4.898868154	4.8642563	4.809683418	4.665574605	4.770201408	5.01541689	5.065503601	4.639482849	4.885569434	4.686051542	5.126710674	4.936674316	4.975227492	7.623369936	7.22600972
10388	3.562772663	4.488307494	3.680648661	3.728164532	4.006103806	3.612338235	3.742420729	4.070662984	3.516125202	4.350688369	4.378055494	3.692031453	3.547425534	3.942071974	3.536419015	4.97572781	3.609435623	3.645406321	4.639618675	3.398271977	4.166005671	4.078088572	4.578905996	6.009743284	4.682934222	3.683487741	4.716220213	3.657068548	3.875927675	3.655594668	3.519920849	3.613370596	4.493949312	4.40721	3.707415819	3.656160187	3.476711507	4.739693046	3.651333616	4.316734352	3.673771973	3.624476299	3.59947631	3.652062084	3.576973886	3.730552223	3.666420477	4.038423101	4.17196036
10389	5.492238899	5.515165364	5.816801988	6.036299125	6.066615937	5.816578982	5.432299794	5.818565212	5.328770859	5.785505486	5.438912565	5.479644064	5.908349691	5.454213563	5.768471801	6.052973243	5.706931266	5.599236556	5.539465733	5.672811347	5.360237203	5.308312843	5.674540215	5.762435431	5.8365936	5.775903425	5.789291934	5.939392117	5.655241383	5.983963461	5.736011603	5.399631823	5.829890066	6.078275803	5.741445227	5.884935001	5.78116928	5.59340712	5.758244498	5.954076179	5.766219155	5.802203652	5.87961868	6.002711646	6.985538597	6.790140481	6.91733815	5.676951754	5.699434101
1039	8.976248117	8.437378537	7.607160462	7.689105731	7.9745928	8.301321343	8.002038356	8.093226465	8.11608684	8.247837655	7.906011955	8.148812748	7.986715541	8.081745256	7.763773916	8.408286976	8.021583865	7.631341762	8.131763447	8.253478082	7.909624535	8.171640521	7.965268658	8.129284613	8.007518782	7.739718725	7.886821217	8.012326745	7.993863152	7.902827503	8.212194091	8.249709959	8.372862281	8.480366533	7.386616306	8.332067431	8.449188843	8.320865285	8.572294898	7.602340398	8.32516365	7.981195967	7.786082254	7.992292831	7.302050133	7.375561671	7.532499603	9.729786943	9.351820426
10390	8.166608747	8.178724923	8.267752734	7.882542152	8.206073676	8.191550979	8.180064648	8.27871735	8.054652176	8.305415323	8.090859675	7.949663464	7.995366922	8.09381643	7.942152692	8.06431779	8.149437564	8.028039376	8.071565989	7.89382868	8.146097981	8.006800389	8.097188228	7.898078734	7.871804499	8.101182708	7.862142929	8.296489822	8.186625945	8.401075893	8.296300145	8.165243626	7.983494622	7.981886836	7.806120285	8.085693208	8.080227089	7.948345134	8.167514904	8.108115758	8.303236139	8.303229628	8.212588066	7.947128342	8.166753965	7.93947264	8.147462559	9.146784849	9.499741297
10391	4.476845316	4.465749241	4.330180825	5.179858796	4.397438092	4.567006264	4.567722338	4.72122288	4.677534331	4.544274755	4.40610155	4.674487965	4.874363074	4.28994838	4.736764694	4.791120445	4.43288644	5.000581622	4.280590107	4.592553385	4.392782395	4.279360716	4.503258592	4.553437439	4.603372482	4.632040848	4.956035765	4.664477843	4.700522994	4.495587289	4.283135553	4.359040616	4.608868456	4.474433023	4.729841282	4.590057026	4.540152913	4.19847625	4.380930707	4.641870538	4.396907165	4.748571436	4.530635336	4.610330661	4.654775009	4.525399817	4.81308532	8.716973024	8.80429985
103910	11.48767756	11.60117698	11.50775649	11.29650067	11.67268548	11.61394263	11.54837591	11.52294081	12.0485104	11.54843664	12.0537131	11.58431829	11.74978655	11.90124467	11.92754497	11.6596043	11.61454766	11.820614	11.49485183	11.80562388	11.83814583	11.72097038	11.9191277	11.37526189	11.19046464	11.85019505	10.60069285	11.78412601	11.84510448	11.69717358	11.40457296	11.75425103	11.68859071	11.48806422	12.19168398	11.53454473	11.51145182	11.7755515	11.61348924	11.42073793	11.69796179	11.56450437	11.59706236	11.62555082	11.5585369	11.17764327	11.55090371	12.92874278	12.94665036
10392	5.952116132	5.958645864	6.19889065	6.40987991	6.147504636	6.159688067	5.95822987	6.156157456	5.882717853	6.159761455	6.274272877	6.043523141	6.416550311	6.413577465	6.268986085	6.488745192	6.023140628	6.310233653	6.026431675	6.145834391	6.087161996	5.776714659	6.40829989	6.161441916	6.216595307	6.165264558	6.259364429	6.319682885	6.069601583	6.058830078	6.085055048	5.802221999	6.318872675	6.159298077	6.528199111	6.03620518	6.193509999	6.134882761	6.089948508	6.109794372	6.050281936	6.282397836	6.344133437	6.455816133	6.669518217	6.722004551	6.333706721	8.440613792	8.257263541
10393	6.01357684	6.118955064	5.589781964	5.77900092	5.868045923	5.897438246	6.105221943	5.825817642	5.712167195	5.823461784	5.679025472	6.062588208	5.550603675	6.189359746	5.539608973	5.929993018	6.069220056	5.612296205	6.346296232	6.088047324	5.82980693	6.188823167	6.36245665	5.718546035	5.201858967	5.949538101	5.567422349	5.651088428	5.882106	5.744389995	5.790663712	5.652448793	6.097339937	5.814672981	5.745536601	6.17632291	6.131110563	5.822433629	6.119185723	5.566811438	5.825276783	5.987161595	5.91318037	5.721067268	5.214133323	5.656760085	5.531071904	6.497304063	6.437921917
10394	4.351743804	4.731825004	4.719884874	4.631603338	4.658334298	4.653300017	4.529988429	4.707619398	4.712469087	4.577644915	4.989143606	4.601050806	4.662414351	4.650814427	4.650400241	4.795997207	4.647444203	4.586600053	4.5463689	4.383681883	4.565731857	4.422748481	4.912772838	4.702963867	4.653754013	4.579079499	4.346728808	4.644934667	4.523254253	4.880279772	4.791158765	4.526398377	4.902826199	4.958047186	5.051697402	4.677601432	4.603939801	4.581858909	4.59195323	4.732303872	4.578612737	4.656607768	4.788958406	4.61071709	4.774592278	4.761419103	4.723148086	5.244933061	5.366866141
10395	5.222949661	5.327056556	5.154475846	5.418133899	5.355433104	5.157944273	5.128914294	5.121008187	5.106359824	5.20047084	5.083415821	5.182470953	5.315298711	5.019373853	5.361120564	5.348086957	5.297230729	5.096713572	5.094244771	5.192198164	5.076281712	5.093498724	5.14299389	5.283502472	5.199708839	5.258846079	5.384861498	5.262440733	5.162048319	5.131197824	5.10517066	4.887158031	5.220318243	5.322044454	5.160649288	5.219785066	5.358586705	5.252710656	5.196069776	5.349248787	5.245603646	5.163439804	5.20566935	5.323191046	5.220751487	5.321001153	5.232640676	6.659792102	6.715829202
10396	4.178114781	4.295352531	4.504831607	4.614231206	4.418366793	4.391811483	4.330234747	4.507697018	4.477500863	4.307060549	4.350022249	4.32649738	4.430999998	4.381802318	4.292336372	4.260788947	4.330462388	4.426287639	4.209581708	4.343686649	4.438379478	4.409882564	4.248115081	4.358406592	4.725741325	4.737531567	4.337874586	4.599738032	4.553184753	4.63382591	4.619377375	4.214137948	4.576747523	4.536538063	4.475296223	4.514610023	4.479652683	4.502483844	4.683843326	4.413954249	4.355227928	4.609267937	4.875655864	4.499118695	4.59971041	4.52509757	4.562461419	4.539423994	4.54430846
10397	10.742074	11.26992218	11.39052128	11.10036576	11.1620158	11.277362	10.05751125	10.85689524	10.50930983	10.90489981	10.35654925	11.36833638	10.98876652	10.59440436	10.62233743	11.38185623	11.15720067	10.71500958	11.10978346	10.78418445	10.20984451	10.54389233	10.85772261	10.9409964	10.9271062	10.84876513	10.94367193	10.87790367	10.76301594	10.7173891	11.11970072	10.80664524	11.08335676	10.9742018	10.26961406	11.12561419	11.44460766	11.36939762	10.89488729	11.12603002	10.32020568	11.06198389	11.17276576	11.06452168	11.40885451	11.0457087	11.06356365	12.47849904	12.3747824
10398	5.386299753	6.102679669	6.080361935	7.219667355	6.691813749	5.694107894	6.862853189	5.909219359	7.295305145	6.235566909	6.560203521	5.88922013	6.847609735	5.639701772	6.092395286	6.223804167	6.258692258	6.064525221	6.405511221	7.334802061	6.180702428	6.432829151	6.328744164	5.240642361	6.007411677	6.201233328	6.681055135	6.74885581	6.989008319	5.73316978	5.838100439	6.604545333	6.317324892	5.94961714	5.991694627	6.100801574	6.685278327	6.190500469	6.231054296	6.673167897	7.086991493	6.212270756	6.009644776	5.678950745	6.380485204	6.002311486	6.149306956	10.86507404	10.57970768
10399	12.26996645	12.11469184	12.11842218	12.01324875	12.1401141	12.07821087	12.62184261	11.93569355	12.13544511	12.25026419	11.96659337	12.27909435	11.87256293	12.32325864	12.36641812	11.9644209	12.12738439	12.33343409	11.97340866	12.13945926	12.24317091	11.86429701	12.1310013	11.87592036	11.91952988	11.6451044	11.66184965	11.97965777	12.2795669	11.71032094	12.31890326	12.60094462	12.05467793	12.16957779	12.12742727	12.12257161	11.93438019	12.03913254	12.03833564	11.80338667	12.20292374	12.12024308	12.00083732	11.97907433	12.00662424	11.94955399	11.96493959	11.28012286	11.57010293
104	5.2977684	5.402257497	5.54297283	5.586303783	5.329648575	5.397600273	5.32927601	5.387969114	5.399818353	5.51732895	5.377770505	5.316878628	5.469128971	5.318673999	5.449319733	5.670404562	5.348404854	5.387085401	5.301081352	5.382177633	5.458372844	5.423180185	5.44906173	5.439650574	5.503848152	5.322096531	5.393114906	5.375108142	5.325825903	5.337511691	5.391507568	5.279969959	5.497460548	5.478862696	5.665638044	5.422388398	5.404949608	5.472688726	5.396081179	5.612567323	5.407597482	5.455157142	5.479929672	5.539054252	5.672441749	6.000666999	5.862418407	6.332080041	6.402354654
1040	5.391686827	4.886225258	4.718467128	4.643911985	4.744345386	4.798094144	4.963351553	5.107876219	4.954049905	4.853475522	4.770614969	5.312709407	4.94245057	5.129875411	4.922607296	4.472091231	4.89548976	4.912752446	4.812302737	4.76572751	4.916521725	4.932705344	4.750868346	4.978583213	4.708661652	4.872418264	4.623497406	5.249204258	4.932242535	4.854807135	4.838177308	5.271295502	4.778525721	4.7663188	4.495970586	4.704429536	4.730186831	4.581562204	4.84162944	4.574495541	5.001437956	4.844298446	4.766952729	4.866291488	4.688170313	4.528458542	4.664488745	5.064980268	5.646104462
10400	7.411322982	8.365949413	7.808957615	7.876533366	7.69938151	7.320856519	7.196211026	7.054539294	7.480897175	8.378454221	7.419169361	7.35731342	7.981451273	7.231154397	7.481040635	7.296123315	8.096695609	7.455825822	7.629796517	6.825070912	7.018040255	7.11283774	7.652082939	7.701261369	7.73212979	7.7701723	8.387522727	7.243589581	7.232419352	7.003460586	7.713321429	7.262756852	8.084463511	8.116375597	8.126383837	7.38551793	7.237219153	7.496425273	7.208457426	7.968066573	8.241789796	7.869860827	8.342093785	8.022279639	8.185029249	8.33094773	8.482885149	8.99595688	8.945867942
10401	5.334138753	5.057252756	5.0945332	5.517374247	5.206398875	5.184274026	5.502835842	5.217504268	5.067361454	5.456428311	5.222863166	5.24234534	5.580218845	5.363022393	5.564272031	5.64272859	5.346681825	5.437783032	5.360710102	5.609482459	5.261956218	5.38365098	5.363646257	5.288057512	5.632967928	5.185089816	5.553251624	5.371295351	5.149831956	5.267855057	5.413836693	5.222409432	5.307987472	5.48001798	5.55308449	5.438964075	5.478569207	5.429319701	5.235498132	5.414011636	5.347045575	5.659355349	5.327765711	5.292699535	5.406986155	5.442971375	5.464212815	8.074451456	7.85854011
10402	5.05375126	5.387153912	5.199530482	6.050390521	5.206684834	5.12327508	4.601008612	4.997751424	4.958376808	4.97362069	4.923315147	4.886049878	4.991239994	5.132121712	4.886133637	5.128428094	5.141638817	4.727438305	5.595841753	5.071502493	4.788834749	5.060384923	5.041462624	5.251607338	5.006033618	4.882191402	5.419508157	4.989188811	5.084007237	4.959354085	5.164530582	5.097815569	5.233615986	5.104818101	5.042886555	5.41832886	5.368128726	5.013498361	5.309203348	5.274930757	4.795383578	5.486463201	5.321048945	5.127131228	5.025426586	4.939874439	4.826105017	10.80246958	10.74269274
10403	3.568771007	3.475159829	3.757356506	3.557506417	3.768859341	3.554229288	3.847173987	3.546724884	3.974910165	3.903956736	3.80938839	3.545867371	3.562063059	3.758082413	3.619861098	3.577015524	3.693692362	3.844806415	3.7972707	4.059819774	3.7610027	3.638020483	3.657770157	3.699964681	3.432254822	3.738479617	3.804488266	3.713132041	3.616077867	3.589984795	3.65787575	3.858246078	3.5922103	3.63553485	3.527221901	3.509653279	3.635160068	3.639408323	3.534959304	3.633027296	3.535640841	3.691225125	3.525661423	3.572264959	3.671197875	3.774862554	3.725625169	4.393196642	4.421205205
10404	7.734967667	7.883652412	7.522168163	8.010240702	7.769866214	7.959386226	7.917924837	7.910124906	7.675372328	8.223386641	7.584721932	7.923313125	7.662941685	8.161547535	7.423522114	7.399199395	7.742097534	7.894881539	8.400830805	7.68391314	7.727994247	7.869536975	7.762667815	7.940918026	7.933095879	8.126634438	7.71138551	7.469014447	7.954357988	8.169715769	8.024124387	7.97663405	8.070276007	7.851247044	7.368058347	8.267191992	7.930083507	7.788735918	8.254059555	7.410918873	7.168940128	7.73726914	7.999769245	7.790730011	7.630328208	7.46731259	7.431470242	10.32105762	9.886491012
10406	8.761703418	7.884322107	7.688236801	6.462798566	8.797062603	8.536716234	11.20599961	9.441689848	9.789912208	8.736764428	11.01848497	11.40278395	9.988919034	8.758574622	9.811491979	6.989875935	9.351349871	10.51349639	9.170869967	9.959434331	10.51103176	10.66767181	9.393970254	8.998385658	8.648843836	9.720901805	10.3875594	10.05484053	10.3195549	9.856248226	8.27402749	11.61446971	7.494974339	7.748018928	10.62562465	7.649183647	7.243086085	7.871753657	7.342097021	8.416879579	9.828883196	7.731044808	7.237579881	7.559870054	7.784214861	7.326773688	7.167817556	6.303553497	5.999939056
10407	3.87871075	3.875824182	3.820939204	3.899914457	4.052265537	4.017949259	3.758239248	3.915252421	4.026507405	4.145026486	3.921356678	3.868309872	4.275375489	4.154651547	4.090758952	4.50976075	4.213498134	4.170804396	3.894803415	3.898903423	3.815521981	3.946815507	4.106283989	3.944129549	3.885357794	3.967745692	4.07857262	4.011323932	3.812549199	4.056707978	4.021637445	4.026114776	4.045985075	4.25671917	3.98855628	4.137116021	3.969507054	3.916846558	3.843744719	4.226263291	3.930449981	4.189125497	4.062543439	4.240586704	4.221679631	4.073561038	4.239164455	4.612926412	4.399003506
10409	6.4746403	6.137760687	6.47107185	6.521017962	7.518031171	6.23776037	8.252985121	6.94096574	7.170252639	7.01949187	6.659761173	6.316724588	6.367711214	5.95919265	7.13923041	6.459925895	6.128807201	6.760219927	6.800902134	8.480708495	7.770695276	6.903932525	6.400351323	6.2392618	6.481469635	6.525853316	6.350965489	7.091964442	7.484808217	6.488075999	5.892579995	6.88150101	6.356965495	6.166842275	6.199694565	6.032753633	6.527182336	6.01370457	6.036627772	6.488297506	6.408458217	6.11144624	6.158097901	6.16860565	5.955858658	5.75404085	5.761758947	6.935778782	7.837159224
1041	5.008805904	4.972437184	5.275495962	5.24612368	5.254891726	5.377900945	4.982679231	5.492579513	4.994918542	5.054059203	5.310141941	5.179155454	5.266995597	5.043748465	5.327255898	5.767494427	5.07307158	5.229601827	4.996248503	5.160164683	5.063175831	4.972953207	4.991509307	5.276742427	5.438744624	5.235332854	5.18184875	5.160760251	5.212936609	5.204101383	5.067866273	4.774938149	5.274649467	5.217591953	5.868613269	5.137663935	5.26377732	5.435180859	5.238953506	5.658125056	5.301693515	5.317970356	5.344145717	5.327818184	5.69532276	5.8747313	5.496271254	5.773417315	5.699549684
10410	10.30280256	10.66510037	9.991609727	10.35367919	11.06182052	10.21951311	11.29577793	11.35419067	11.5795964	10.62520612	11.93499753	10.32718011	10.64409985	9.917648225	10.19096419	9.868975161	10.3400275	10.95710191	10.87232282	11.7744228	11.87827378	12.26381498	10.46902564	11.16304109	10.14623007	11.3268566	11.12062572	11.35419067	11.06003342	11.46848156	10.14081335	11.46168857	8.841189727	8.375786875	11.74580678	8.778852067	9.301863468	8.620320697	9.243847038	9.511089965	11.63266159	9.058337772	8.439411036	8.919611478	8.45771421	8.252125823	8.316263806	10.78413775	10.67209045
10411	5.14462068	5.894742634	5.635868544	5.833845579	6.416668072	5.77793328	5.603769144	5.403943249	5.467460138	5.547932402	5.99064725	5.423373208	6.071194385	6.133296113	6.3150927	6.233190342	5.928823274	6.214605894	5.475978287	5.460701198	5.969135907	6.249796977	6.577599231	5.961266573	5.8548529	5.960297916	6.127726785	5.608405313	5.72926602	6.029287634	5.330071648	5.207333351	5.501572606	5.361450458	5.554028875	5.666374245	5.692986332	6.247983345	5.684796731	5.019470442	5.658810603	5.852169276	6.049547879	5.495459706	5.065068073	5.936189088	5.74803215	9.266617852	8.696263989
10413	6.424589861	6.142871338	5.844064211	5.705454877	5.858653858	6.290914924	6.038227662	6.148035835	5.971494431	6.013701659	6.338143408	6.322352547	5.987913114	6.23061629	6.038604814	5.953851106	6.57633763	6.328472301	6.724914926	6.498846072	6.31701657	7.16419372	6.40641672	6.056072129	5.956338507	6.686331253	6.039209585	6.10418369	6.337403022	6.298429341	6.355540221	6.797468936	6.555371339	5.916180559	6.375406796	6.4406918	6.51928338	6.272556066	6.443670058	6.048328793	6.66150032	6.225247474	6.143075963	5.944144941	5.76981306	5.363670505	5.853695038	7.518011862	7.376038568
10417	6.191467821	6.50881884	6.047566185	6.638545375	7.165909097	6.63854506	8.961884786	6.156296215	8.562094464	7.589530796	8.062333175	7.28124238	7.219073297	7.639213438	7.528870807	6.720747582	6.984175142	7.799223875	6.927178535	7.207216233	7.709093638	7.664637808	7.029848847	6.25638004	6.717862903	7.659071766	6.63216003	7.141808123	8.078952861	6.392357125	6.050810683	8.690934466	6.182666746	6.208558203	6.944669012	6.172021267	7.065360309	6.288954965	6.287587817	7.252955828	6.859714597	6.333694988	6.776940515	6.687569285	6.400448283	6.370265989	6.619480398	7.34153642	7.948808234
10418	6.516693702	5.288607321	5.211341925	5.370420729	5.395066637	5.324506588	5.613081757	5.926917558	5.54802573	5.552831877	5.657474034	6.239490613	5.416628483	5.308941043	5.359388624	5.347546727	5.548297655	6.216441716	5.400018356	6.411373726	5.652261429	5.366936722	5.497161083	5.611599226	5.588782186	5.342937411	5.450337512	6.736180583	5.498761346	5.346734698	5.919422562	6.163350231	5.284972753	5.32991003	5.896953683	5.306056579	5.211848516	5.456947111	5.661130499	5.453050425	5.611843354	5.615689759	5.442854639	5.371741031	5.467581592	5.415630043	5.387655276	5.120299809	5.226832088
10419	8.700225863	8.474367849	8.373604644	7.807338241	8.516858408	8.52888229	8.657951391	8.367065838	8.293583918	8.553908739	8.433843028	8.692885574	8.035224956	8.387856218	8.199118038	8.201959328	8.589862409	8.182743352	8.615410169	8.221741442	8.697058921	8.664909309	8.122191541	8.50488582	8.297573007	8.411039436	8.205390077	8.803931119	8.561644338	8.446821447	8.477983304	8.762297949	8.465601253	8.625716826	8.789116811	8.601806391	8.465320514	8.291223403	8.50508696	8.048137287	8.589691849	8.187450092	8.416615895	8.113731914	7.772846999	7.669993129	8.019932875	9.913527953	9.764892952
10420	5.394919674	5.357131653	5.327542367	5.231438705	5.571252707	5.781927602	5.411689202	5.601846607	5.51621559	5.369409994	5.212515146	5.405905088	5.1875267	5.528734339	5.746344494	5.484696739	5.457141812	5.443619149	5.267014903	5.339225581	5.341821257	5.343911088	5.797654303	5.322269531	5.683435183	5.383373974	5.282842813	5.60000151	5.220875377	5.430057123	5.31373953	5.194662689	5.452446734	5.656817406	5.603394151	5.550131642	5.718925447	5.486583829	5.583817197	5.502163683	5.770747269	5.492145375	5.484065008	5.328681756	5.835936124	5.817777205	5.478796625	6.74491552	6.141626713
10421	7.999648047	8.141456922	8.117288788	8.221749044	8.418735896	8.169650622	8.401969125	7.774826479	8.223511638	8.278057278	8.434855744	7.990850876	7.813450549	8.264497837	8.129385663	8.06816576	8.220153841	8.2535169	8.021663305	8.398917749	8.393838306	8.453963494	8.090195444	8.108216015	7.973370736	7.712887013	8.305276509	7.90949324	8.221781071	7.903229121	7.93721825	8.317306651	8.152050641	8.030215402	8.094947027	8.097827358	8.018049547	8.000452597	7.845302328	8.076276721	8.240200094	7.82243615	7.926444621	7.81386611	7.993715465	7.660536975	7.860213423	9.490559985	9.440608243
10422	7.339282257	7.331902542	7.272276632	6.789526557	6.6687665	7.082928364	6.975179774	6.907698004	6.99059598	6.865539952	7.304774516	7.138501769	6.780993106	7.11501626	6.950076257	6.940295252	7.046623932	6.993312303	7.174726681	7.303870856	7.347715087	7.284147456	7.506749779	7.268901434	6.854788196	7.302129645	7.50480202	6.971929109	7.021898197	7.081164426	6.957265157	7.095270452	7.251030525	7.393793424	7.195459394	7.28644408	7.462798402	7.305227925	7.20134026	7.160820741	7.035209223	7.13455872	7.255688801	7.092347765	6.748855421	6.725277585	6.814030784	9.241682517	8.866346412
10423	10.64055349	10.58733689	10.53909161	10.36073062	10.01414199	10.38044267	10.5564327	10.62027793	10.62229926	10.46145266	10.53256671	10.33777125	10.4765459	10.74079358	10.33247219	10.36399303	10.70796995	10.63273955	10.55387265	10.63159591	10.47262503	10.83383803	10.68761877	10.53211813	10.4261381	10.58376579	10.55772602	10.45294566	10.58498664	10.32241477	10.60388784	10.77170206	10.28455177	10.31414432	9.976539977	10.52556606	10.61658245	10.41195323	10.49573117	10.36723208	10.69000587	10.57376281	10.55943559	10.38763891	10.10350656	10.51254467	10.39247059	11.68853872	11.72650713
10424	8.296469015	8.052609478	7.492186539	7.687866396	7.626319109	7.980851665	7.340034566	8.03812407	8.185236531	7.959657563	7.707092464	7.816577262	7.715319159	8.262787336	7.788836773	7.683240251	7.924425989	7.503745551	8.120230049	7.706199498	7.512420796	7.886297085	8.102848544	8.020537028	7.715306259	7.856024852	7.442653198	7.408635517	7.656434508	7.683520521	7.892938609	7.836179189	7.887055099	7.704682669	7.285165225	7.997554548	7.771848222	7.920432426	8.054360677	7.456754734	7.471329335	7.761464392	7.939991029	7.879225653	7.482838784	7.309950543	7.563354241	8.792564128	8.902616848
10425	5.947381956	6.083722682	6.024741022	6.152561159	6.100082418	6.082869293	5.961513526	5.929860127	5.957139958	6.098018331	5.935391061	5.844286723	6.049447532	5.952693642	5.999094446	6.115303132	5.967205431	5.950176973	6.054879592	6.078694049	6.028572211	5.992749024	6.016033686	6.030019762	5.916288796	6.210788109	5.988047486	6.046310757	5.962270868	6.052553591	6.146195162	5.994250005	6.099694916	6.044865419	6.068396145	6.062701201	6.117678847	6.068012332	6.134157873	5.977963338	6.16215255	6.128731016	6.005926891	6.046922422	5.972320447	6.00812798	6.109237327	7.46403467	7.291646261
10426	4.341108014	4.188120685	3.950190918	3.921418182	4.144424791	4.252842307	4.262287101	4.317757003	4.194529295	4.178495319	4.44308471	4.276424862	4.239882522	4.301392248	4.113798864	4.39132975	4.465959427	4.02797371	4.548837331	4.409836659	4.270373743	4.203562384	4.354995211	4.192719444	4.042250756	4.130599761	4.354126581	4.057423917	4.329764485	4.397229263	4.417998597	4.13916792	4.485770909	4.281179083	4.069714073	4.233243647	4.260538768	4.368080498	4.867546855	4.312604219	4.274485631	4.97952884	5.411160722	5.014841181	4.452255865	4.491946391	4.630266832	5.200595946	5.187934991
10427	8.065769115	7.808980035	7.464603019	7.331887354	7.086729666	7.771737109	7.847846459	7.584859708	7.850254388	7.555913729	7.327449481	7.766805256	7.485618325	7.784864464	7.669308344	7.386108728	7.926839295	7.536741193	8.002834079	7.851771887	7.564216443	7.796636894	7.525179766	7.662811263	7.457540361	7.693287523	7.229515316	7.586240288	7.515121699	7.533339752	7.516602833	7.592301699	7.466042985	7.324507074	6.912740281	7.611537936	7.649003442	7.539286194	7.881799348	7.334121576	7.24097698	7.671365305	7.5758639	7.574008348	7.135821111	7.001117966	7.229159774	9.267732479	9.269453525
10428	9.739228294	10.09033082	9.748473925	9.488387721	9.88153674	9.689116367	8.608766706	9.771838171	9.29705005	9.114175092	9.22850978	9.784912569	9.819996951	9.63727802	9.764559936	10.08297186	9.887665128	8.652936757	9.744409238	8.985787962	8.607530788	9.536452928	9.457753269	9.725579347	9.320362364	8.854362821	9.266481749	8.620776705	9.098694206	9.589432077	9.365909325	9.355822051	9.634283026	9.48449279	8.973287484	9.649299039	9.665072403	9.519122486	9.485797157	9.065343623	8.400490984	9.184922009	9.359639474	9.302881793	9.148188306	8.879977786	9.175424923	9.474355739	9.597439821
1043	5.010830097	4.730965765	4.869541075	5.240213129	5.344451685	4.615297759	8.504417469	4.708926354	5.799144119	5.422497032	5.218082594	4.963585853	4.981896295	4.42385314	5.341183128	4.760683152	5.009797071	5.958879569	5.322232209	7.053608351	7.163438593	5.598080234	4.958368358	4.528141247	4.708454947	5.836835681	5.43128311	4.593777593	6.953963901	4.833565363	4.652474671	6.205586953	4.654068054	4.638419147	4.721536826	4.560934289	4.742453863	4.742324907	4.604649582	5.249663258	4.521831755	4.563707989	4.606159499	4.592946451	4.771271377	4.626988381	4.550618656	7.919142432	9.192148876
10430	10.35293261	10.26246857	10.44546706	10.50640871	10.3079854	10.4033032	10.18790716	10.22955242	10.4572661	10.3898968	10.52077695	10.18476269	10.19049782	10.49347869	10.17762612	10.18363304	10.10737341	10.04542329	10.44474142	9.971360902	10.37521548	10.38046181	10.58416965	10.22694533	10.27776394	10.13042441	10.45338176	10.25089363	10.20025496	10.27004701	10.29032895	10.39546144	10.25716633	10.24116719	10.32817061	10.35922803	10.26577559	10.40014893	10.21699854	10.43508755	10.62133946	10.36618278	10.33260749	10.15268715	10.10523844	10.51483473	10.13340402	11.11635347	10.89702647
10431	8.438864056	8.571396149	8.390576794	8.277557832	8.420234033	8.232499072	8.248081207	8.206982565	8.295395552	8.573336899	8.665643175	8.575685958	8.23741066	8.575220358	8.342054041	8.568019833	8.368634118	8.121119899	8.393318168	8.211662511	8.333465114	8.350419798	8.776980792	8.182495437	7.900184438	8.292249829	8.49570386	8.333016104	8.150888192	8.289842782	8.274528565	8.559703224	8.397723947	8.204006213	8.020714871	8.463600729	8.476721435	8.341650761	8.45235548	8.115408752	8.134377147	8.148574214	8.259500118	8.316701559	8.040330051	7.93989511	7.919685262	9.413879848	9.343005327
10432	5.616056533	5.35569231	5.111546806	5.099938656	5.34863993	5.640338432	5.36023029	5.710368183	4.982528754	5.431803564	5.298550859	5.655342797	5.39050128	5.44771225	5.645731631	5.596442906	5.306794531	5.543843962	5.385856569	5.255625305	5.581189063	5.696934059	5.312973801	5.57326598	5.542875825	5.487251648	5.506188848	5.806705955	5.550391317	5.425483018	5.391168833	5.484063953	5.674155508	5.902920251	5.580267267	5.63997335	5.792486858	5.553657288	5.827164192	5.889270056	5.738048149	5.483050025	5.386235189	5.735193321	5.366408611	5.483206943	5.477447035	7.355224207	7.268339353
10434	9.106262019	9.004670559	8.59156167	8.368281709	8.269891271	8.381829935	8.73093625	8.433855038	8.527574799	8.653633085	8.264469196	8.578671903	8.412815779	8.810753132	8.32756979	8.312910668	8.763520739	8.324806573	8.875074328	8.387890085	8.64522073	8.791340595	8.879039966	8.77301555	8.249381335	8.737217756	8.045837544	8.506515509	8.426455474	8.682289798	8.438520983	8.77428706	8.694827122	8.873168855	8.360516964	8.723410318	8.782387761	8.581379291	8.946225109	8.541991342	8.650663475	8.76321863	8.714936519	8.772280282	8.099996252	7.656719468	8.114152621	8.756857339	9.106086863
10435	5.464641757	5.495734831	5.606247023	5.609250427	5.430021058	5.473712022	5.644537519	5.510946524	5.341893881	5.653141409	5.465207991	5.514014211	5.586194082	5.552139333	5.659933832	5.669025868	5.51728305	5.817923374	5.443956536	5.456109152	5.50415217	5.357087769	5.422079537	5.478148096	5.722522155	5.308863861	5.630605191	5.63091653	5.559621987	5.471082621	5.728890444	5.321567086	5.793329005	5.695000301	5.872473325	5.585849814	5.754803939	5.561686113	5.545760789	5.726266166	5.630244233	5.629134759	5.568257114	5.713853021	5.958757722	5.928224933	5.615092263	7.46101283	7.358878317
10436	8.236435599	8.126565455	8.182679116	7.9987533	8.167461506	8.001361168	8.226243481	8.006817252	7.944224828	8.056440253	8.118862201	8.150386851	7.719421608	8.161868115	8.047452669	7.898737777	8.011632942	8.154926907	8.22518813	8.211597121	8.134678752	8.344686593	8.250515223	7.723418925	7.699272404	7.570231037	8.026238592	8.320578906	8.186101987	7.839345309	7.932215739	8.315356941	8.063651047	8.004322511	8.120402623	8.083166528	7.919010171	7.71014211	8.064174386	8.165200899	8.579756585	7.868757725	7.886405044	7.808738548	7.396155901	7.722864435	7.790617361	9.211139898	9.293091004
10437	9.597144908	9.723593748	9.578489395	9.846379181	10.05386509	9.802356782	10.69238492	9.616353089	10.78412269	10.22230304	10.37238049	9.863056047	10.00913135	9.733486357	10.14405676	9.477078327	10.07164077	9.991794928	9.864295669	10.17672179	10.63078201	10.48417563	9.502442902	9.765484421	9.51356736	10.70538358	10.89243935	9.35196468	10.45520137	9.70821892	9.484862868	11.2030727	9.320032518	9.346036126	9.589022411	9.402953422	9.569572013	9.708776752	9.25317891	9.916762481	9.812656969	9.410016362	9.237464825	9.036188264	9.275621297	9.614992278	9.086256995	13.0695989	13.4518063
10438	4.659843	4.242148906	4.413249342	4.892707343	3.771879272	3.911317076	4.455642859	4.799402853	4.121671374	3.93544755	4.347643295	4.116453341	3.941815176	4.038216297	5.650077526	4.018497964	4.743926544	3.766241825	4.545427053	4.545956719	3.911326112	4.547401496	4.696495408	4.311892361	4.0514897	4.153610138	3.911478835	3.998170235	4.118761044	4.229469412	4.59996308	4.69085354	4.148444688	4.914233031	4.120447437	4.217784591	4.613653118	4.297797177	4.845477502	4.455901832	4.088342558	4.610507817	4.239609809	5.010211018	3.461268848	3.461037652	3.833829397	4.512856207	5.083980652
10439	4.713708293	5.016719011	5.077975334	4.924307093	4.906371334	4.8207904	4.868167815	4.881512169	4.89294094	4.953976007	4.787256062	4.738456735	4.97853265	4.895728294	4.888292736	5.094479472	4.783815197	5.026941137	4.723633243	5.163938472	4.852012994	4.724723193	4.742023541	4.79018099	4.867590097	4.883745385	4.778242404	5.164795129	4.861273066	4.796964683	4.785136385	4.688540587	4.928934981	4.902894976	5.145867838	4.679495418	4.884225565	4.93495772	4.846898776	4.934158568	4.934697955	4.871704242	4.896567446	4.901506803	5.319575643	5.313023621	5.282654329	5.66634459	5.923684194
1044	6.305971325	6.530062398	6.700523242	6.734942684	6.587303999	6.680747428	6.364257206	6.596110402	6.493333473	6.725675914	6.642288887	6.481937941	6.820808111	6.461891455	6.675525199	7.114742623	6.535475958	6.541000583	6.151955833	6.482264629	6.771044765	6.374723635	6.702207206	6.766548625	6.67831953	6.53624282	6.317937814	6.935990554	6.690572799	6.84453794	6.597821415	6.36731224	6.692744109	6.798035456	7.088387592	6.359385889	6.551330504	6.714257594	6.605444339	6.722167512	6.7195331	6.789060069	6.918735422	6.695471375	7.095437035	6.735123985	7.148406687	6.706641248	6.64295207
10440	7.297894812	7.416639261	7.389461088	7.41985414	7.476594056	7.247389238	7.456823613	7.166577768	7.362759424	7.153134804	7.385587354	7.287343289	7.059916941	7.431450722	7.421873467	7.151889882	7.322953306	7.266805232	7.385287833	7.310828887	7.39863049	7.414782811	7.453062947	7.225912453	7.136885124	7.436237255	7.282724859	7.312921427	7.348429268	7.435140312	7.271001115	7.4770026	7.472104333	7.365768868	7.25197916	7.306083967	7.44995423	7.465146772	7.50673185	7.321125032	7.53425747	7.32715118	7.327108329	7.459118012	7.213608537	7.327245104	7.113201267	8.041929316	8.211129208
10443	7.155923134	6.692440104	7.017116105	6.839212806	6.967586835	6.798828924	7.170525775	6.756706577	7.087159505	6.645329301	6.908917459	6.902650859	6.891762499	6.919805421	6.806517391	6.87720348	6.866306098	6.774889105	7.174846609	7.224180118	6.882951157	6.504517234	7.633078938	7.050527285	6.857694159	6.956248319	6.94859114	7.13064096	6.857472307	6.819723122	6.735577696	6.450299111	6.59897677	6.624456825	6.506550185	6.917275519	6.691869456	7.190917736	6.817426685	6.903486365	6.958431529	6.858809062	6.812426807	7.086145746	6.865329059	6.774758058	6.566327509	9.228208273	8.509452066
10444	5.83906993	5.907064086	5.941515686	6.047358138	6.020341034	5.98066588	5.683273025	5.88065372	5.637642736	5.968555006	5.84755328	5.836185405	5.89711953	5.840061099	5.755108253	6.121037947	5.913029595	5.868820182	5.851547913	5.703208961	5.757102941	5.758137973	6.035429857	5.942231546	6.047968868	5.628238468	5.91579012	5.80848203	5.905897057	5.794332195	6.193646404	5.924685869	5.932422622	6.123821012	5.868693242	6.037468166	5.975549249	6.19710724	6.023897843	6.204227822	5.927454875	5.981196911	6.056452473	5.925268561	6.027848293	6.383892664	6.123947122	6.36396162	6.35380053
10445	5.898022941	5.744822665	5.917036322	5.756096451	5.92599093	5.852627961	6.497132569	5.90357048	6.023250186	6.122208318	6.058478882	5.930941614	5.807719036	6.235864016	6.099474216	6.099134588	6.125325408	5.874506399	5.908167814	6.058818574	6.269543876	6.098746842	5.995041071	5.990636376	5.667225833	5.720761712	5.90503726	6.23646238	6.202468022	5.804369538	5.956220179	6.123344463	5.877135446	6.173492145	6.145536989	5.596737751	6.101767057	5.962490724	5.86512666	6.088672752	6.156217666	5.746857197	5.748645359	5.739676413	5.485936921	5.979559046	5.55076466	8.268594708	7.940309447
10446	5.27620536	5.344689167	5.675585973	5.183189028	5.509436233	5.436072997	5.435986002	5.310255944	5.37094866	5.231551615	5.581852854	5.259257332	5.63330656	5.345759416	5.62663893	5.640604631	5.435315065	5.345104429	5.409471119	4.967070848	5.668425279	5.230120937	5.541552065	5.364684643	5.507663066	5.617082413	5.481447006	5.22721395	5.956815943	5.677790985	5.286931339	5.037832742	5.558336285	5.444715204	5.89572835	5.332055511	5.466534815	5.476113815	5.20232487	5.543906211	5.576693476	5.358595855	5.463405978	5.324913608	5.582317907	5.428326257	5.29852193	6.435234663	6.357235557
10449	12.34600217	12.0989219	12.15717126	12.1808703	12.25050519	12.22940399	11.45700633	12.06390419	11.92846384	12.18726195	11.93987102	12.679809	11.84911175	12.0138397	12.04956551	12.25364232	12.12292666	11.61644949	12.28117838	11.80717429	11.58826127	11.90069839	12.08529149	12.23120134	11.94178349	11.82370707	12.09892887	11.71907209	11.85434551	11.97635833	12.36892544	12.0119612	12.14807819	12.21342044	11.99683344	12.4813868	12.34107291	12.01292127	12.44586884	12.37017475	11.49803934	11.8906927	12.04841108	12.18645069	12.01064275	12.17774665	11.81219233	10.86015108	11.27314111
1045	6.099602808	6.050385462	6.103953538	6.309235119	5.519588216	5.829900218	5.950827622	5.935283486	5.865072879	6.304615538	6.014211472	6.101628812	6.155911511	6.059247733	5.945525288	6.464446021	5.948784764	6.384206286	5.793216632	5.73665458	5.639532249	5.545931506	6.005937824	6.189104655	5.960601372	5.692026322	5.912566734	5.99166972	5.95761094	5.904843278	6.276018323	6.031819797	6.410638024	6.257713996	6.476001864	6.242076516	6.319430987	6.374415512	6.058185924	6.347017506	6.351257049	6.252205874	6.229083111	6.485381367	6.658651706	6.78458798	6.506482714	5.819362962	5.906123653
10450	6.831246363	6.898151703	6.643256174	6.594700345	6.777486758	6.79885859	6.887877167	6.708756513	6.693565807	6.790817467	6.577645922	6.777263714	6.437101556	6.647451155	6.563985432	6.51928205	6.743991184	6.478638134	6.815315506	6.503790144	6.745182247	6.797506377	6.822102302	6.556200846	6.416747351	6.685219043	6.628680104	6.549236406	6.465146415	6.48457824	6.778343709	6.672089889	6.53599655	6.520920646	6.739682279	6.759281264	6.622133153	6.516517963	6.628909147	6.761750909	6.748494632	6.37927489	6.537558931	6.48368743	6.258065698	6.788197233	6.44700216	8.290458428	8.161366341
10451	9.867289801	8.833341574	8.860799243	8.242510914	8.320725821	8.859058514	7.919587896	9.292738605	8.506314719	8.546652158	8.565898754	9.452385156	8.555915514	8.491109203	8.469496523	8.449664881	8.570606519	8.414041163	8.741724346	8.383840095	8.247702521	8.816731492	8.136373161	9.054436264	8.792384749	8.252000559	8.476172355	9.472460152	8.353672617	8.335892893	9.254850604	9.294691283	7.826084596	8.475490178	8.233262189	8.61785241	8.498314332	8.32665883	8.575883902	7.938987496	8.485279945	8.345763779	8.309051845	7.980063999	7.853973282	7.361386085	7.693620088	7.082417929	7.321678308
10452	6.829447167	6.802634167	7.319742847	6.958200421	6.78922854	6.816740674	7.021221712	6.882077855	6.874807319	7.212517132	6.905393008	6.958850888	7.094388092	7.00931364	6.617970509	7.041669228	6.894508083	7.036215612	6.876159335	6.641884247	6.571443071	6.789229758	6.931306806	6.911429494	6.94657351	6.720628362	7.165532259	6.841911037	7.008034157	6.668329443	7.218531118	6.96936477	7.134573283	7.11586526	6.993998093	7.053700092	6.934358168	7.348375048	6.616132981	7.278142118	7.081669641	6.975484587	7.011398039	6.948585307	7.40671995	7.785796383	7.687340183	6.460999417	6.097917172
10454	4.495715378	4.634021985	4.275007097	4.205935353	5.07831808	4.581876431	4.469263392	4.686428207	4.406336354	4.450407722	4.355350281	4.446681012	4.653080125	4.428353692	4.614483245	5.04588028	4.378083479	4.2451634	4.22245593	4.219195904	4.134759468	4.544694451	4.532763162	4.489957225	4.5026263	4.447272027	4.737091903	4.413937338	4.418746898	4.447424629	4.53640813	4.222462989	4.229135131	4.649113383	4.339571109	4.267729698	4.51781991	4.560718673	4.525445317	4.641289645	4.289345558	4.514011167	4.526661827	4.463622127	4.803450531	4.802122026	5.109924932	6.162021133	6.208879944
10455	10.59467965	10.56805315	10.77848836	10.77734107	10.31783163	10.51451649	9.61475051	10.46000768	9.932401251	10.52611152	9.629070643	10.61923098	10.14455422	10.48909836	10.13381374	10.61508163	10.49043592	10.04696519	10.52303573	9.712236642	9.855124066	10.20265764	10.64798035	10.62714864	10.66812791	10.01508425	10.69947948	10.3365054	10.23902185	10.35861547	10.79206509	10.176913	11.05089863	10.8121706	9.812417589	10.95611191	10.77730328	10.58238252	10.78690822	10.60310468	9.80129852	10.52707438	10.6413051	10.54260441	10.42675419	10.66283692	10.65095358	9.663344754	9.657952021
10456	8.922895807	9.117913748	9.191014909	9.116512858	9.178042559	9.202865617	8.816996909	8.723644449	8.759465508	8.954041595	8.932675127	9.078787916	8.878313259	9.182056015	8.877202064	9.196428383	8.848808563	8.954469698	8.982252618	9.005407279	8.72237779	8.867296979	9.38592479	8.817876595	8.71989273	8.593298985	9.066195684	8.852060738	8.897491202	8.802738686	9.201170587	8.890390151	9.199794861	9.080084906	9.213188028	9.227974793	9.132726817	9.095099354	9.237603377	9.153199488	9.273924959	9.190234422	9.058620254	9.014378721	8.901120266	8.985239593	8.993495259	9.599180986	9.705197009
10457	7.952150891	7.613062914	7.12812569	6.681272205	6.546312313	7.313044648	9.16565541	6.433085643	8.1437431	7.270666091	8.317532438	6.711922286	8.487124558	6.709973224	6.899451682	6.885331229	7.18491625	8.037782858	7.070570993	8.050195574	8.235212363	6.151888133	6.26738489	7.136832306	7.171139348	8.23283993	7.339713753	8.390762876	7.484182919	7.386282698	6.59783539	9.950566402	6.824406564	6.551159938	6.189803482	6.699764918	7.369632875	7.304567448	6.819663564	6.763462563	7.240255723	6.948712118	6.291273715	6.026154952	5.982550248	6.666089004	5.29623391	10.67520972	10.51158042
10458	5.014424476	5.171655412	5.259935578	5.42008489	5.075887592	5.136876714	4.812193803	5.185542234	5.078652126	5.189768127	5.02837944	5.107043661	5.351478908	5.270514245	5.110883419	5.615570175	5.314956332	5.340613349	4.952016759	4.937301953	4.906951499	4.93511642	5.448433135	5.230880167	5.27310887	5.100625633	5.425615858	5.131937389	5.2059644	5.174199239	5.363709012	4.943014993	5.765660453	5.553967732	5.302319651	5.298255962	5.428046699	5.439935028	5.497630262	5.725212346	5.269227257	5.516757912	5.811177629	5.839347542	5.852935142	6.347975088	5.846028845	6.510631624	6.404858376
1046	4.328316057	4.340668131	4.502947324	4.547353362	4.729552927	4.380620055	4.126294446	4.48540289	4.212002759	4.249533135	4.240504014	4.362708544	4.270859567	4.502518691	4.394516689	4.918776669	4.304034622	4.528628789	4.099452212	4.286259744	4.374060644	4.24085813	4.483385061	4.344649841	4.233733015	4.263102382	4.323713901	4.288845377	4.427788503	4.170323239	4.165539868	3.952975459	4.23084543	4.381440553	4.667292937	4.172626588	4.404473651	4.587233397	4.242048497	4.513501864	4.483227786	4.29858454	4.401193565	4.382784687	4.418020636	4.912665037	4.569573176	4.933537719	4.620064423
10460	4.286695148	4.721343826	4.902546089	4.770913942	4.568805453	4.428567359	5.122913748	4.524374415	4.529259181	4.636344577	4.976007097	4.619714198	4.555900155	4.506653945	4.612567717	4.690410655	4.421850534	4.916310436	4.498279772	4.553171394	4.630957422	4.788764708	4.736694598	4.407728873	4.635045526	4.640772733	4.713192169	4.492612601	4.745366461	4.446764121	4.518562341	4.648623403	4.629290684	4.436283018	4.759126621	4.395389434	4.404376984	4.467195249	4.477340779	4.618613762	4.489425525	4.822691182	4.658612968	4.804123171	4.915468444	4.750242351	4.733083452	6.297810742	5.891128504
10461	4.815163613	4.998005201	4.989595318	4.937926655	4.865096732	5.10502328	4.997229883	4.885558486	5.384921861	4.865010063	4.720898985	5.09080399	5.299243836	5.015957517	4.953221694	5.134459028	5.278163026	5.3617661	4.942618314	5.731173548	4.936833145	4.852159785	4.856221746	5.115177478	5.184282755	5.521706423	5.004537	5.61712328	5.116811854	5.031920404	4.91492328	5.148064205	5.045851421	4.976395532	4.859190477	5.169016081	5.067986616	5.38928624	5.223045338	5.027940638	5.011154853	5.13305679	5.174865145	5.205493537	5.421476053	5.015867917	5.305844392	5.93838244	6.614198618
10462	4.46739261	4.414131485	4.504164318	4.53367265	4.751623326	4.533408336	6.202002776	4.443848872	4.894719222	4.825316673	4.991774355	4.602683369	4.429275309	4.453408296	4.341043993	4.745116802	4.363750948	5.112216151	4.51454113	5.524443084	4.583755898	4.588576764	4.697653321	4.572387667	4.535873915	4.885091778	4.628287992	4.482558887	4.919232727	4.354215238	4.404770502	4.580102538	4.480751119	4.451941648	4.878358258	4.419346951	4.322952374	4.679110213	4.348621968	4.560738195	4.591772528	4.379876735	4.280855079	4.514346108	4.663109016	4.702545896	4.538689657	6.458764071	6.683297544
10463	8.630733394	8.764181457	8.563870177	8.317527552	8.609570964	8.500446175	7.855652058	8.304317431	8.333336052	8.394599162	8.357803628	8.319808985	8.183989447	8.517844304	8.1739095	8.231927713	8.737816506	8.289114952	8.710188861	8.236516743	8.16930639	8.221732136	8.682171214	8.655988829	8.429482527	8.473646284	8.742935819	8.229973884	8.355994451	8.385202102	8.263814238	8.241921168	8.6414323	8.438750108	7.900631056	8.651898578	8.579142348	8.711772498	8.788282816	8.294972542	8.385218075	8.565561351	8.687974229	8.661343011	8.284819278	8.046685062	8.056008495	8.323891874	8.585542942
10464	4.783832767	4.325332334	4.22034779	4.48933215	4.394399839	4.333244921	4.965940643	4.284471218	4.623235027	4.549865686	4.523123152	4.907222187	4.351933196	4.483880484	4.644997385	4.408393861	4.197466642	4.502114632	4.806507595	4.579503916	4.916610379	4.694419261	4.71024529	4.569179285	4.41500068	4.947949988	4.107982266	4.22520427	4.494469665	4.319135828	4.149844048	4.42632039	3.984459325	4.161230318	4.200482872	4.401795441	4.262734942	4.2660917	4.333597684	4.230694567	4.274632097	4.517818738	4.333886774	4.211647852	4.328718811	4.268623515	4.484172906	5.678453063	5.393562126
10465	8.158899068	8.008106632	7.719441777	7.388942393	7.727570057	7.698622507	8.365425093	7.242492916	8.014591169	7.760048266	7.599617839	8.250568215	7.737398475	7.678694537	7.735046578	7.668721895	8.03021078	8.109515528	7.87807811	8.06374276	8.427350232	7.785879495	7.448824215	7.752710435	7.182600103	7.852290096	7.487786631	7.747240772	7.819183367	7.537949475	7.593092102	7.827422955	7.516309524	7.568640124	7.105471317	8.051248703	7.71065451	7.839392097	7.786780473	7.759049637	7.868862411	7.796716812	7.297732228	7.618306678	7.483830845	7.626453564	7.469619553	9.419324649	9.064670083
10466	6.525456149	6.604535642	6.327263524	6.236175799	6.203596593	6.742184689	6.829128152	6.479436325	6.548160961	6.582269885	6.52499243	6.514452389	6.331965329	6.605232264	6.535447606	5.867768467	6.720620698	6.75367597	6.876452759	6.692672478	6.613180044	6.701833907	6.550969283	6.575562336	6.535313047	6.521721193	6.533931734	6.536115637	6.50567126	6.509183091	6.609639431	6.801024677	6.445537036	6.467778387	6.182906451	6.504897607	6.434425435	6.376507373	6.516256425	6.530291687	6.799334167	6.506873465	6.458267052	6.382497703	6.020196417	6.125934848	6.037936516	8.358902951	8.347064508
10467	9.408313296	9.478892736	9.490031708	9.323655666	9.644307179	9.063283627	8.995213978	9.063802168	9.150543034	9.49427927	9.001270495	9.501215335	9.027452904	9.286539391	9.296460553	9.582344523	9.399094027	8.80415221	9.510758512	8.969136905	9.017063544	9.397660948	9.53856773	9.228227666	8.930890231	9.277968888	8.913734362	9.13197661	9.183248056	9.299579629	9.227884841	9.207202619	9.435490573	9.171505616	9.235622833	9.371963825	9.425909083	9.150027936	9.359063193	8.628872659	9.183629487	9.376806666	9.367968792	9.102524304	8.939201896	8.614380955	9.113412701	8.268843077	8.276477726
10468	5.138327643	5.413051566	5.361079508	5.620303563	5.572756387	5.38641239	5.294927798	5.419195555	5.420013379	5.589832605	5.365889648	5.337518847	5.501546461	5.453618105	5.473354513	5.487332804	5.251971896	5.736835114	5.362413168	5.397077424	5.339809223	5.303257927	5.374510752	5.458335783	5.543159908	5.401573106	5.52554776	5.413140665	5.325881076	5.399514673	5.413180853	5.224137511	5.444767678	5.512063122	5.657166092	5.23272535	5.383668538	5.425001655	5.387496387	5.525553726	5.435549952	5.568594249	5.43735827	5.469099612	5.548707482	5.608824628	5.624797468	5.915601167	6.062591874
10469	7.021098961	7.017477534	6.940467274	6.723218119	7.121191687	6.751800918	6.613469057	6.796121551	6.725359944	6.819091644	6.973682695	6.949639791	6.914558399	6.696841905	6.928777103	7.251163971	6.859365428	6.715446898	6.803669671	6.80700351	6.676776818	6.951213727	6.888654098	6.822760721	6.870394312	6.805992186	7.001281795	6.946440083	6.86572341	6.976617929	6.890131703	6.820170999	6.873461697	7.040143673	7.122396995	6.995748736	7.117297941	7.120448925	6.849109013	6.927530895	6.981659923	6.811211294	6.799652963	6.90286021	6.774550405	6.9774435	7.02544375	7.813114684	7.205628555
1047	3.516957962	3.608076938	3.651973338	3.853634366	3.708129808	3.629968534	3.630415195	3.569321637	3.564366406	3.602722831	3.565864778	3.535712395	3.555260129	3.733412602	3.559082667	3.536093858	3.584928497	3.704603725	3.549989975	3.511593769	3.633671091	3.401687972	3.672107797	3.651558403	3.556415141	3.700738608	3.541974046	3.63447298	3.496847039	3.62494017	3.688116709	3.656212363	3.630910611	3.65336249	3.57093969	3.62398777	3.587152182	3.654854012	3.590147906	3.616591355	3.568180598	3.558583898	3.579727261	3.620922729	3.778833959	4.006499153	3.736754794	4.173106247	4.271794595
10471	7.421997526	7.491450053	7.31094981	7.329512069	7.725655726	7.488274397	7.687205257	7.577110254	7.314714307	7.256681798	7.516600464	7.44325323	7.252926107	7.619445835	7.494529265	7.561204031	7.533675129	7.381708695	7.551625338	7.702202008	7.681292927	7.852111664	7.623477691	7.420064992	7.426136053	7.47305239	7.359897508	7.547728211	7.520617559	7.552217004	7.666325835	7.47533201	7.371211897	7.44383823	7.639602662	7.513686819	7.467041151	7.514005952	7.531553399	7.499355052	7.521049224	7.673846544	7.439842942	7.502318293	7.67302148	7.643681563	7.78411539	7.124038363	6.778698743
10472	5.717907314	5.303690943	5.350271664	5.078170952	5.167015825	5.366899662	5.305663953	5.548806176	5.363493822	5.239905811	5.15427484	5.316171198	5.096218226	5.309082271	5.241491602	5.08945208	5.406368033	5.149460939	5.518610237	5.065883899	5.282679184	5.401638643	5.326281962	5.578941925	5.274439514	5.177170546	5.163370222	5.437880554	5.318520745	5.42365499	5.32888364	5.4673506	4.948663794	5.432142262	4.740864975	5.308407022	5.160002374	5.313665493	5.421479664	5.053575175	5.274570359	5.199117467	5.254492936	5.116363289	4.807248901	4.547828182	5.07684648	5.758410381	5.671749105
10473	8.374893688	8.076482626	7.963523273	7.97830101	7.854711956	8.116830625	8.517372029	8.048608811	8.295745782	8.009835206	7.923077744	8.237869128	8.126048417	8.245578545	8.190355174	7.919382513	8.12040861	8.243452112	8.290079544	8.474129358	8.482880225	8.458475389	8.289862036	8.089309295	8.040171688	8.268033068	7.941696431	8.159873247	8.361893105	8.120223728	7.975129651	8.445968112	7.893000776	8.041447861	8.025004199	7.959668471	7.966921349	7.834727779	8.219476059	7.821657018	8.131010219	8.0264829	7.974630667	8.024882558	7.602297343	7.20788535	7.566877924	10.18362113	10.22032842
10474	5.349357213	5.351423611	5.404325564	5.338037267	5.282120809	5.497636344	5.371470147	5.29964965	5.362980752	5.460572346	5.489125248	5.473252396	5.402526812	5.536562354	5.525136586	5.510387792	5.550160493	5.409535549	5.410494259	5.227777914	5.411593158	5.391416904	5.397267449	5.206833201	5.312800638	5.294552081	5.472556174	5.428214429	5.549703871	5.366826108	5.398362258	5.450559478	5.585822778	5.518877917	5.617296523	5.48895434	5.696917876	5.42950291	5.397268632	5.660698778	5.474231701	5.361254869	5.496927206	5.41260802	5.417768513	5.576691524	5.352701598	6.453785235	6.394428846
10475	7.866447437	7.90612108	7.514069495	7.734310666	8.279163604	7.907180715	8.579897824	8.354121671	8.239891424	8.14145748	8.893245192	8.082990559	7.633618931	8.017249097	8.562597198	7.35250274	7.925252615	8.031628084	8.116695472	8.389908769	8.469710977	8.636295051	7.796746331	7.793342954	6.688852414	8.331212171	7.763163519	7.253954663	7.838381441	8.547029065	7.265022	8.134851479	7.833839965	7.358989045	8.177158115	7.48243269	7.834852945	6.94765533	7.763060564	7.789719211	8.123250199	7.061625544	7.371807947	7.178316786	6.803317928	6.318271553	6.826543776	8.786660452	8.810693705
10476	12.44750452	12.42883143	12.49864724	12.34944806	12.37880486	12.24085045	12.34228355	12.12818817	12.26473538	12.30989627	12.32870428	12.42446136	12.15394349	12.36160831	12.30001842	12.44079384	12.48446407	12.32487491	12.26342589	12.16546582	12.31748183	12.37559369	12.52136022	12.31062499	12.16791308	12.10406126	12.41713946	12.55016088	12.24834436	12.3717736	12.6318694	12.49605277	12.44254607	12.43129431	12.48655198	12.40024076	12.45368276	12.32280215	12.38948384	12.26429872	12.6433644	12.39651989	12.39903827	12.3702544	12.28825076	12.19819228	12.4323666	10.14824931	10.3943333
10477	8.243112052	7.920934682	7.378502559	7.308199339	7.327919766	7.402001922	7.598985764	7.700867921	7.584342979	7.391458893	7.474514824	8.095834577	7.484039915	7.96936889	7.466130938	7.024678619	7.980383875	7.284659711	7.787326205	7.548023077	7.562974857	7.964608547	8.080190842	7.773396924	7.363014451	7.836718021	7.782446913	7.414176573	7.457314349	7.103959803	7.782060932	8.055298337	7.633514053	7.602014429	7.126553402	7.665899182	7.414950755	7.044618226	8.040382121	6.964970063	8.271905925	7.681669101	7.792998606	7.433221882	7.001222277	6.257579302	6.252766164	9.038098922	9.153767669
10478	6.369547845	6.292476212	6.082790448	6.042884369	6.09690682	6.175056936	5.947130902	6.184019638	6.122140827	6.191850391	6.017107707	6.307934189	6.239390635	6.19084429	6.17331677	6.235948804	6.191931267	6.242620447	6.225315471	6.026719125	6.212862773	6.10888668	6.321191506	6.1938523	6.364614444	6.23664	6.429213771	6.408781075	6.149393177	6.048668481	6.320172781	6.337799429	6.286566785	6.428874361	6.3506243	6.248331453	6.343899495	6.385700816	6.28827866	6.289634951	6.29974947	6.224552296	6.179080745	6.228122399	6.342426403	6.604281844	6.158019972	7.469952279	7.390917168
10479	6.998283188	6.954335086	6.557085767	6.845161327	6.331928802	6.821501689	6.851749491	6.756539441	6.947636384	6.989988649	6.801034928	6.763502526	6.77846362	6.997682148	6.668986032	6.688583643	6.742793556	6.9221873	7.134680728	7.235043354	7.165200966	7.002539211	6.920967855	7.191169175	7.042155757	7.067532039	6.925177388	6.934741809	6.941813383	6.907005623	6.757763564	6.908152081	6.687471087	6.662682671	6.40958181	6.942540757	6.874814224	7.078357742	7.166055189	7.000261364	7.052570501	6.788970169	6.854646691	6.691103008	6.610584347	6.474054179	6.581963636	9.065931066	8.845308576
1048	4.738091889	4.548164743	4.568971502	4.711003229	4.89602597	4.630083556	4.616156156	4.81820132	4.574919368	4.751387485	4.69337472	4.728480531	4.974403255	4.454963918	4.869881321	5.403318716	4.555017002	4.492078683	4.552279765	4.66675525	4.61625331	4.811993058	4.625459892	4.839498567	4.749400442	4.878788727	4.739439743	4.749957965	4.627072049	4.78803099	4.696614272	4.342061374	4.553012651	4.730312223	4.986757969	4.32936426	4.612219372	4.963425687	4.627491649	4.979389544	4.774539128	4.632854269	4.822984247	4.894805671	5.343080323	4.872973526	5.280907533	5.433975192	5.335003138
10480	8.951067983	8.741857595	8.525304866	8.688159239	8.938324532	8.581129747	8.874633642	8.523025634	8.658727911	8.459464903	8.633632573	8.720060841	8.542350953	8.936342773	8.792109536	8.557987694	8.692900849	8.686065395	8.66644333	8.661153322	8.618285784	8.426810161	8.634496348	8.490957961	8.312870572	8.610133739	8.653470612	8.517421958	8.630553952	8.079706308	8.534569144	8.712902203	8.405151753	8.427892162	7.947889092	8.643086839	8.44688928	8.674927125	8.733639163	8.191582746	8.411695323	8.656109671	8.503818938	8.424423491	8.327868728	8.063443432	8.414190787	9.942395697	10.12956006
10481	4.822994548	4.739109593	4.888560647	4.928899986	4.579400986	4.769275397	4.664126004	4.711877633	4.596961259	4.634653727	4.70910788	4.672909589	4.816839328	4.783625767	4.682653612	4.788052209	4.757693547	4.817651754	4.618389362	4.703425441	4.698729784	4.434675046	4.711551784	4.682582693	4.807789697	4.731831108	5.062490126	4.720931203	4.722789831	4.545417132	4.666728543	4.612861614	4.938356496	4.861502734	4.872207531	4.677384654	5.036930771	4.681988281	4.813472668	4.875711173	4.91271717	4.883065567	4.856579682	4.776619126	4.770480038	5.36876911	4.882617237	4.936572545	5.080729397
10482	6.922333293	6.654725318	6.623376353	6.880271876	6.652076297	6.862144507	7.173700326	6.679899027	6.735822298	6.74833773	7.190595121	6.687164242	6.985268952	6.346385352	6.838448815	6.514584496	6.737617375	6.742727682	6.868906628	6.834204254	6.893357565	6.903590306	6.805547802	6.58088861	6.637670898	6.912846601	6.476131366	6.915027026	6.555941928	6.727554195	6.602707321	6.803729369	6.672105669	6.449978613	6.668596925	6.733359645	6.804089477	6.840893196	6.787331696	6.616734259	6.68078053	6.587957237	6.591244438	6.772090349	6.224464704	6.421008638	6.455347204	9.462130646	9.053512837
10483	7.451450099	7.264987572	7.185419085	7.292329136	7.392829474	7.131503864	7.279890727	7.199753601	7.276176221	7.253256775	7.435849133	7.344331497	7.015062595	7.478090074	7.313312659	6.794588652	7.528737094	7.138247018	7.364647099	7.258513979	7.235572837	7.353788157	7.249831128	7.223004857	7.133130672	7.710234859	6.948700942	7.411382965	7.145628858	7.232057342	7.204667814	7.264585555	7.059611769	6.867161361	7.404827877	7.412900986	7.092980637	7.210562974	7.303220439	7.061540527	7.562509082	7.334815896	7.34698658	7.140779702	6.883251105	6.416536995	7.149008039	8.192118217	8.096075849
10484	6.186705891	6.456931979	5.661355875	6.014750244	6.299927921	5.922517641	6.536695018	6.285767664	6.518118906	6.738796022	6.533438862	6.296517334	5.808633933	6.442299295	6.552470691	5.671131142	6.476942284	6.448222206	6.877279516	6.575509019	6.377040627	6.916839894	6.439384242	6.281714222	6.216921978	7.073994118	6.439796045	5.900323087	6.574323147	6.568701758	6.049623129	6.582728672	6.544781427	6.838732564	6.653532745	6.445366024	6.447239752	6.170585632	6.731778611	6.487362719	6.925219025	6.179546434	6.723531379	6.623411776	5.906255852	5.95345878	5.726079204	7.526783404	7.836823445
10485	5.922116345	5.989176194	6.120150344	6.166612515	5.846933991	6.183933629	5.701786481	6.327761714	6.153292351	6.119178394	5.902860011	6.020619675	5.853895299	6.131703333	6.464063456	6.029867139	5.705038042	6.003473162	5.872954916	5.970688429	6.057638144	6.047472288	5.984744536	5.971010641	6.291107222	6.092187005	6.326695534	6.027686533	6.104991283	6.218412241	5.95398688	5.751021901	6.055668514	6.217091773	6.667177278	5.98627437	6.108456349	6.305775022	5.84879076	6.311516414	6.007137751	6.180514228	6.044886998	6.160395214	6.509503258	6.463901499	6.524007638	6.922598181	6.906548205
10486	6.612527457	6.817600888	6.483963988	6.785006565	6.626519865	6.584300409	7.445983235	6.462466778	7.124567556	6.722823266	6.962639158	6.94426413	6.655372627	7.000830138	6.950984627	6.474796302	6.959988354	7.160766593	7.056913555	6.665194469	7.188191216	7.078551918	6.832955792	6.698150443	6.590119017	7.439698323	6.380873421	6.621390089	6.801158264	7.189661609	6.2854012	6.970707279	6.168478399	6.120088766	6.357828933	6.281620528	6.450984825	6.178745527	6.430554764	6.721725626	7.469338084	6.129758314	6.028109301	6.303148484	6.08669263	5.975157462	6.145036384	7.969377058	7.941763366
10487	9.558414211	9.434118415	9.627839619	9.607660743	9.984123875	9.615004788	10.45557503	9.556803433	10.12359193	9.838803235	10.01911967	9.843664382	9.809079916	9.876787725	9.899816822	9.428601159	9.90436652	10.18190323	9.918470974	10.35537891	10.18926319	10.19352386	9.812084004	9.700196749	9.557448806	10.20309568	9.986085418	10.05770868	10.08969512	9.913406442	9.73043713	10.3427611	9.654585301	9.754285923	10.04159067	9.817921337	9.835677346	9.857597964	9.828873581	9.505082797	10.54215528	9.520463781	9.491601302	9.617130435	9.536853265	9.165703063	9.358128643	11.52719977	11.77234836
10488	7.970429723	7.661013755	7.816769145	8.115653978	7.723774838	7.882948357	7.666149394	7.841756458	8.09275989	7.647155848	8.106564238	7.984320687	7.597084681	7.745668004	7.830521386	7.923389811	7.484232793	7.533603779	7.597865136	7.718634693	7.96842512	7.814580886	8.042807843	7.680020605	8.019069338	8.023674904	7.783073964	7.909495882	7.936635967	7.634873086	7.930689089	7.988613452	7.883483982	7.955441043	8.40046489	7.745903863	7.73943704	7.919171382	7.910793253	7.797928451	8.083967102	7.783902142	7.900662135	7.896361874	7.968083763	7.836001569	7.86015494	9.740521966	9.657755464
10489	7.49164942	7.39012953	7.170336592	7.421330328	7.229225675	7.442330378	7.475055727	7.232352513	7.28502215	7.242392755	7.498311049	7.292667556	7.514460716	7.424594244	7.640112325	7.097595164	7.439576649	7.344666927	7.252629161	7.166696376	7.298527206	7.41454588	7.310553937	7.472724322	7.379598257	7.277147467	7.528273856	7.455096951	7.347491416	7.323756898	7.573045902	7.589166199	7.377695065	7.183885681	7.300402755	7.452310806	7.495603695	7.298692203	7.219392593	7.507059882	7.72774614	7.423562106	7.532903856	7.305143488	7.048559402	7.562495171	7.429850607	8.561212802	8.529128957
10490	9.922250844	9.938296272	10.09794844	10.05026127	10.0958075	9.874835241	9.785980722	9.542682435	9.872319645	9.760338827	9.376502111	9.749729118	9.276160396	10.20732071	9.86040712	9.876292753	9.866696841	9.808764788	9.888550781	9.755483954	9.859823387	9.966729903	10.15648987	9.765337701	9.707764497	9.688158025	10.19933828	9.688751528	9.764744438	9.41493575	9.845931866	9.849857889	9.903918072	10.02288054	9.709583368	9.960878036	9.617383924	9.767717088	9.892716569	10.06347129	10.37612841	10.05776948	9.744997901	9.834327646	9.553382555	9.705936955	9.59831731	10.71283604	10.41435599
10491	6.745287004	7.164435474	6.810312368	6.772058258	6.735809317	6.868036339	6.919222694	6.402479651	6.835337874	6.910456925	6.418850459	6.508915317	6.708717936	7.005386485	6.68615086	6.910885842	6.976259348	6.973018316	7.166884363	6.714274834	6.744271809	6.645142499	6.987768084	6.821137945	6.940990325	6.88364167	6.575119796	6.331239009	7.008519977	6.835527656	6.842313629	6.872114257	6.95568923	6.893085841	6.867369101	7.340562813	7.118707919	6.998616335	7.127102788	6.87263492	6.892879448	7.300554533	7.153679694	6.870227315	6.874226938	6.635146658	7.082813943	8.199951413	8.127014395
10492	7.862017259	8.062826862	8.007998893	7.572446616	8.350772754	7.701618024	8.155578563	7.77995927	8.531290055	7.969453421	8.155293609	7.972176076	8.107651014	8.362180756	8.459586915	7.762110673	8.280917693	7.529089996	8.087895791	7.929120951	7.867626847	8.274320815	8.109872192	7.754302716	7.705016023	8.079915903	7.707366467	7.87274662	7.74730557	7.505629959	7.639308391	8.416612044	8.121971947	7.707562459	7.027609888	7.791195312	7.98484618	7.346362402	7.953279581	7.664128666	7.764694107	7.764784484	7.979095167	7.965572275	7.451729068	7.464532596	7.434611299	8.812972288	9.046325613
10493	8.723198033	8.772043132	8.96153893	8.804053402	9.069843122	8.835863514	9.002454216	8.513058273	8.946742986	9.143442558	8.898483336	8.873724498	9.050917671	8.980679277	9.114762479	8.905860175	9.075322009	9.042893352	8.626845979	8.563540068	8.711672341	8.56989129	9.136666995	8.972610506	8.874263128	8.910979889	8.83377929	8.633936896	8.984340927	8.683401152	8.833621037	9.352121771	8.683252753	8.886617256	8.846534628	8.893699358	8.905735442	8.83546544	8.614546514	9.048129318	9.038415677	8.738222235	9.001297902	8.819225814	9.139137499	8.995647999	9.056380592	9.606609455	9.910181308
10494	6.319430471	6.081859332	5.892773418	6.426430465	6.469590181	6.000899467	5.867644518	6.301781179	6.355104998	6.347582365	6.419901718	6.068644954	6.082194794	6.037609221	5.946745028	6.681115554	6.341587593	5.664236553	6.21239499	5.93838918	6.111570337	6.50317541	6.708402931	6.220167031	6.168004443	5.754562201	5.577891207	5.933079071	5.952388204	6.241983461	6.128031778	6.534601217	6.17447917	6.07392223	5.819304069	6.309346026	6.079541996	6.35184286	6.257845151	5.95853152	6.340150088	5.973847088	6.317826041	6.016782943	5.76251773	5.508332602	6.010279795	7.867112524	7.713921083
10495	4.124286022	4.219923035	4.201801804	4.438517687	4.279070039	4.244470292	4.375993378	4.126367833	4.20677197	4.262783737	4.272778973	4.178625458	4.215179205	4.388795842	4.274289794	4.262269059	4.256043918	4.219486417	4.219399344	4.236678507	4.260444139	4.242527243	4.273989936	4.245306942	4.30770525	4.314865608	4.201752549	4.265934434	4.283485517	4.264414362	4.160676105	4.148190793	4.189067883	4.2245662	4.11896531	4.172565968	4.230564851	4.187912247	4.141245969	4.21706608	4.255508663	4.197847794	4.182212945	4.224090903	4.335571762	4.180450936	4.234575875	7.332664106	6.974825962
10497	8.379035179	8.363638002	8.154974111	8.253298261	8.152437232	8.178323769	7.855939554	8.216917752	8.254712325	8.330161457	8.402896845	8.314538908	8.131068292	8.499378218	8.149926805	8.330782073	8.158355601	8.260945086	8.269031198	8.183299438	7.926075264	8.34841699	8.50572453	8.399606986	8.430109379	8.097950724	8.569775577	8.573126206	8.007170057	8.392159842	8.449246624	8.268759917	8.283547963	8.392633586	7.920563695	8.257819748	8.282075978	8.482110666	8.448891816	8.365009454	8.408843254	8.276595088	8.322612216	8.34051254	7.979831467	8.135905161	8.260021864	9.537828509	9.2510913
10498	5.021696939	4.848770132	5.020043176	5.173126885	5.283816413	4.974650674	4.839732932	5.050344091	4.980894203	5.369847152	5.325862769	5.001060608	5.115612982	5.22480017	5.238723597	5.149981431	5.105753196	5.08237424	5.067150183	4.933259499	5.006312659	5.192225919	5.372080293	5.13544409	4.926491669	5.059187229	5.12117839	5.032519966	5.095420628	4.910085814	5.133653313	5.144516687	5.220070795	5.213984847	5.20883781	5.093961335	5.030209878	4.993424094	4.918334885	5.347062329	5.356889636	5.094185961	5.182838703	5.016697941	5.630004955	5.259475863	5.170305692	5.581231182	5.439273819
10499	4.705093601	4.447459472	4.404888797	4.211903387	4.091088735	4.462064476	4.353945817	4.417645975	4.339517615	4.168875891	4.282284122	4.295177261	4.294260436	4.46944292	4.284193944	4.199416855	4.761896069	4.43841373	4.701114803	4.416892485	4.530034941	4.840743677	4.305978625	4.510666544	4.81074505	4.378108913	4.259743674	4.541462012	4.555505296	4.515383329	4.615885652	4.67007585	4.468634932	4.472133016	4.105414689	4.69923783	4.626165533	4.439214643	4.697967454	4.477954375	4.57309188	4.806431803	4.529526082	4.452369652	4.406397286	4.227256621	4.225179114	4.924527593	4.817793986
105	4.243815861	4.27550142	4.695767493	4.351611922	4.201667983	4.328991058	3.967582596	4.259334203	4.161764244	4.434326362	4.30820471	4.229613628	4.393661295	4.479352907	4.274241826	4.558663127	4.272333983	4.551055012	4.159471557	4.105893896	4.37101263	4.014064557	4.476141794	4.362416859	4.391431071	4.203378701	4.375530941	4.341039244	4.273852717	4.260426474	4.441664523	3.983142349	4.332444546	4.397782402	4.582844468	4.530175628	4.196360871	4.47794571	4.1810312	4.456219263	4.246347325	4.442240425	4.621842359	4.432570896	4.661556248	4.622975344	4.689637447	4.800378436	4.85820057
1050	6.334055714	5.891910578	5.850450293	5.41492856	5.925810162	5.82697155	5.737406213	5.737802979	5.21444257	5.588124294	5.792677198	5.07799215	5.471717316	5.099120687	5.514211201	5.60582617	5.432314072	5.593340277	5.584552938	5.600646372	5.858001908	5.535188707	5.707047843	5.428704671	5.315425795	5.66970738	5.475668603	5.263442615	5.754738997	5.313830222	5.325357726	5.55328586	6.262204485	5.551653051	5.014947026	5.534845672	5.741099869	5.518139421	5.445389238	5.840342868	4.854417256	5.487087268	5.198279214	5.281596748	5.551580878	5.49314985	5.227749735	7.998352459	8.056975635
10500	7.038476462	7.12693263	7.405566756	6.993067984	6.945885732	7.104187144	6.689904108	7.00561252	6.587169515	7.384616695	7.110688915	7.151887256	7.426188741	7.12884219	6.921274192	7.473168901	7.282293237	7.541741973	7.059880611	7.027208612	7.124123819	6.907782094	7.198929214	7.49958885	7.501786176	6.517282755	7.328122109	7.107630151	6.651913647	7.111985004	7.453798953	7.018985446	7.470254037	7.586882979	7.404490908	7.322708844	7.433276989	7.649846585	7.201686702	7.741942668	7.382231549	7.312828665	7.4252055	7.512467044	7.859626613	8.329726407	7.864724913	6.278193739	6.423706061
10501	5.774473739	5.794211205	6.32798219	5.899611103	5.846481847	5.939539554	5.635481454	5.996996453	5.848634111	5.953806161	6.176594758	5.844366994	5.973223753	5.955601086	6.063992529	6.252463999	6.315862895	6.424351455	5.694167839	5.942500183	5.966431556	5.790848223	5.932475378	5.998851498	6.03145373	5.962783044	6.054414006	6.08940051	6.142194394	5.903956251	6.164353949	5.868982202	6.175486798	6.235100338	6.223478139	6.090709795	6.122876661	6.064782766	5.881277486	6.41534316	6.139046099	6.086378741	6.117300788	6.1236356	6.453476378	6.741467155	6.800878366	6.242670292	5.887768176
10505	5.775251594	5.764372935	5.633239916	5.759310635	5.70547849	5.771464195	5.605566691	5.833488837	5.765077998	5.692586595	5.67012262	5.727999566	5.866362988	5.78850325	5.876341658	5.940490783	5.649108793	5.853553163	5.660538146	5.665492255	5.90082541	5.642857472	5.590757004	6.010433938	5.912194558	5.799279221	5.778714771	5.930946621	5.767693869	5.736244947	5.672412196	5.5291795	5.607595289	5.947856558	5.898575091	5.602898123	5.648414237	5.973147261	5.617070325	5.99062194	5.872530102	5.839756343	5.853037869	5.943254406	5.948582252	5.944968536	5.906901526	7.080367246	6.91577503
10507	6.750933331	6.410505816	6.111860157	5.949858639	6.562413065	6.27000303	7.109606897	6.392440951	6.751405646	6.130537884	6.028420497	6.656157146	6.436211665	6.444459068	6.610970227	6.096090948	6.501095002	6.917745909	6.473038635	6.56880294	6.685217641	6.805916086	6.264412071	6.156507224	6.313423656	6.305000819	6.695495714	6.273732677	6.545961383	6.626825958	6.350137355	6.753786292	6.423186859	6.129214008	6.56605256	6.293753213	6.547916966	5.871790171	6.503023916	6.592344615	7.055721857	5.981365198	6.657359455	6.163890395	5.665907811	5.618594035	5.794597454	7.025223137	7.223008863
1051	7.350097003	7.344702134	7.17547431	7.373590337	7.969293091	7.127238363	8.780789989	7.563348064	9.042754632	7.721926213	8.678933731	7.896781857	8.368780744	8.325342192	7.915780911	7.774395811	8.573698089	8.397009671	7.961240926	9.183617781	8.870009544	8.765413218	8.175922581	7.361823288	7.037445352	8.307477276	8.595557025	7.987634582	8.653568682	8.248072783	7.453680823	8.593106685	8.817232118	7.724264549	9.560178044	8.364940063	8.831295866	7.99719685	8.415239377	8.673189963	8.736709558	8.606895192	9.00744744	9.467272925	8.346181872	8.195305504	7.823718206	9.931416485	10.00043413
10512	3.996142501	4.414046918	4.129450392	4.200765386	3.843644209	4.468555837	4.352680294	3.967196321	4.350707964	3.884171876	4.162199778	3.906418308	4.59016917	4.213364613	4.098753115	4.154913317	4.271000971	4.353346802	4.370179052	4.428245003	4.406859066	4.072686298	3.936833753	4.397451075	4.419316074	4.711157305	4.43546707	4.387185705	4.608195353	4.167058191	4.278911003	4.340753138	4.654301537	4.270721728	4.212935139	4.284152966	4.668061094	4.578685303	4.290392731	4.264525141	4.025827926	4.76294406	4.061814017	4.621109292	4.336975291	4.376942878	4.209977243	7.106422981	6.627648497
10513	7.052262128	6.654262263	6.286566816	6.504751964	6.360536111	6.446041721	6.590166122	6.606896606	6.370115678	6.306670825	6.536795035	6.426677363	6.402232071	6.468061653	6.413413288	6.27070413	6.507200228	6.375833643	6.750691164	6.666235301	6.493430044	6.825547245	6.520400389	6.657726359	6.547500608	6.41824278	6.542686787	6.500931691	6.49662249	6.686144314	6.40090374	6.72339165	6.550519104	6.541942915	6.540199061	6.506298747	6.544496129	6.199037014	6.658612536	6.34917306	6.704858612	6.507628235	6.425942507	6.322111409	6.202767259	5.859595729	6.123214047	8.288787319	8.385953297
10514	5.166268467	5.138948951	5.260537718	5.376496947	5.435622843	5.076772897	4.836094619	5.218493476	5.292632472	5.164732778	4.880454267	4.956508788	5.207019625	5.134111326	5.313222581	4.804130689	4.818962632	5.212575342	5.076120612	5.151494035	5.183850101	5.109853947	5.152044886	5.450144667	5.373336754	5.37213676	5.529030066	5.31350948	5.138497755	5.18143851	4.953483098	5.059424026	5.153971009	5.157004924	5.100700065	5.127425883	5.150883955	5.474107217	5.077276424	4.96363687	5.110790854	5.062249698	5.185369639	5.285200483	5.39805842	5.718666231	5.284043958	6.035597298	6.053513142
10516	8.761158451	8.589666217	8.685225649	8.349992488	8.863222496	8.514204977	9.27908063	9.39038748	8.964218002	9.409920536	8.900875965	8.398513397	8.71320179	8.018046805	8.571219368	8.185775705	8.858064363	8.871256811	9.067770291	9.491170174	8.554877935	8.630277203	8.715234172	8.003030496	8.858203665	8.752795056	8.710211191	9.245908477	8.817935404	8.706065174	9.235331202	9.177060761	8.284800839	8.175083331	8.017130306	8.767133382	8.238587879	8.628387128	8.737364377	8.244887075	8.9117956	8.585686556	8.164889033	8.621388643	7.930499802	8.036234604	8.303325665	6.47207279	6.878607726
10518	6.347144805	6.548691203	6.658186356	6.755171783	6.671238297	6.691472855	6.871499038	6.442169691	6.711013329	6.691658794	7.169797883	6.691090891	6.670805673	6.694587961	6.705898291	6.704374758	6.446037138	7.0362961	6.501841935	6.473434321	6.950062753	6.753846496	6.719037702	6.522855669	6.779723868	6.479947233	6.63483957	6.696780153	6.900468738	6.542180524	6.348837739	6.590685461	6.655903737	6.719209799	6.838778776	6.685504582	6.566797988	6.704341657	6.623871997	6.662222533	7.029928233	6.66439926	6.86594282	6.638314904	6.668445201	6.789405008	6.69183507	6.689031814	6.545827331
10519	9.811343401	9.777731881	9.897370326	9.571617238	9.711811641	9.649963738	9.38357552	9.617973383	9.375056914	9.760153142	9.578641844	9.725970323	9.130215683	9.890344077	9.562385939	9.5407348	9.389749	9.411419695	9.567576797	9.221691023	9.510282087	9.603146732	9.822779458	9.275371639	9.311243038	9.457228501	9.780539786	9.147023318	9.398419447	9.354139988	9.71649182	9.742270955	9.527093566	9.465853247	11.00849066	9.5727004	9.510304913	9.473010949	9.686238468	9.773089099	9.622887781	9.619292525	9.578454721	9.30411593	9.206092189	9.618755438	9.515752047	8.917583345	8.862102387
1052	8.219463128	8.134441873	8.041850471	8.200153447	9.30457598	8.811314988	9.302784045	9.037578205	9.603157622	8.532210778	9.361217033	9.228450604	9.132648029	9.217479754	8.631775086	9.029959197	9.265039963	8.962305106	8.91003947	9.91936812	8.915776915	9.735659818	9.091578291	8.420870814	8.085151659	9.070008484	9.007446846	8.521609338	9.436380687	9.783705292	8.668372907	8.905650592	10.04569218	8.865110876	11.20004944	9.776323763	9.836307593	8.969038607	9.781778931	9.830343179	10.4177944	9.27503965	9.50618918	9.603396681	9.505118197	9.75732771	9.20146719	6.852618568	7.185646992
10520	5.456568774	5.420522714	5.314910371	5.711806106	5.55623127	5.635706715	5.267468335	5.54534585	5.507380213	5.158788931	5.453503815	5.559030095	5.539918297	5.421363984	5.588122986	5.516258471	5.485852765	5.400606999	5.205320186	5.657318367	5.347067205	5.502909409	5.471113259	5.165406358	5.208673893	5.009053568	5.748325676	5.857154689	5.525351128	5.265655758	5.531741947	5.538288271	5.012828801	5.226665788	5.577132293	5.607326658	5.31599058	5.381738312	5.559096116	5.371742103	5.552987477	5.50461243	5.45833505	5.400763906	5.500491443	5.136785611	5.697812906	8.184301554	7.719472782
10521	8.552282669	8.312877704	7.233299284	7.44965709	7.418881236	7.067980629	7.162289336	8.212079906	7.632448773	7.072517064	8.763910223	7.242119564	7.601926132	7.063144524	8.671645424	7.100746501	7.34790836	7.409366044	8.111129725	7.32584946	8.249298736	7.301246854	8.479027811	7.179023818	7.264936318	7.27517063	6.987520542	7.301786334	7.266758319	7.152125482	7.203025946	7.235331674	7.213070214	7.924257678	6.610373004	7.53161685	7.064571192	7.204370315	7.671154854	7.162517159	7.115772675	7.229591118	7.683738283	7.43649714	7.268506254	6.733035838	6.832556819	7.550254424	7.554083157
10522	5.468051656	5.556603169	5.476677628	5.651941178	5.734215935	5.781173522	5.878466892	5.225612571	5.503376686	5.535342554	5.9273137	5.409717554	5.440434906	5.582489756	5.828178042	5.959218666	5.597106601	5.459597723	5.528013631	5.637895217	5.719230105	5.474939834	5.505808761	5.78274223	5.470413442	5.542624391	5.900385785	5.801552864	5.383567403	5.392242509	5.500699203	5.667435297	5.660551964	5.581729623	5.426146609	5.55178265	5.717749619	5.644392719	5.687899058	5.498328854	5.659425036	5.715761916	5.429567784	5.330789036	5.369028629	5.62609782	5.707135526	6.780777011	6.178437708
10523	6.105232541	6.097257181	6.198517686	6.252039545	5.940655017	6.206138339	5.873488744	6.187365748	6.010948347	6.074804848	6.035622205	6.105901627	6.243153458	6.022676014	6.266159584	6.171282592	6.073091109	6.181858546	6.079942996	5.892095053	6.043129575	6.086777531	6.148205376	6.228025067	6.124263145	6.201782968	6.105274087	5.956472572	6.229580137	5.979793342	5.845935287	6.019034282	6.082304907	6.107380387	6.184189749	6.098099602	6.068017552	6.101109251	5.954435227	6.106131427	6.163587961	6.231859938	6.191770279	6.256017337	5.906871243	6.294962413	5.941428388	6.751850141	6.740201831
10524	7.741769665	7.5168112	7.434617696	7.517997772	7.506313862	7.556591559	7.441783083	7.389731047	7.381241216	7.675984692	7.628811715	7.613575031	7.234925	7.608390423	7.552625526	7.555216646	7.486795441	7.578636722	7.306250002	7.34411548	7.348170789	7.305162291	7.367166077	7.377739538	7.345329794	7.332596232	7.509937827	7.478271765	7.485993767	7.103201822	7.610480426	7.540922884	7.536821468	7.690386643	7.614276657	7.668305877	7.534246221	7.554472782	7.658989225	7.546713284	7.691707115	7.538720936	7.471282668	7.387317053	7.378699744	7.626535199	7.592323177	8.845904843	8.536421449
10525	7.223849902	7.502352685	7.53105861	7.573971926	7.251333946	7.449303965	7.698583815	7.624129996	7.636302839	7.84072085	7.653054743	8.101125769	7.903382175	7.874419287	8.006922239	7.196391216	7.59330164	8.008175014	7.53584899	7.650508734	8.008066019	7.70338815	7.184942439	7.712591723	7.381492139	7.767252431	7.637495243	7.85636874	7.814221091	7.943432946	7.452657041	7.849242098	7.422998459	7.790954468	8.711649339	7.55925354	7.466977527	7.516401865	7.534799588	8.243540514	8.597621312	7.789009758	7.598849568	7.720627282	7.287953739	7.832203739	7.483242565	8.811625014	8.801738706
10526	4.926092701	4.789086546	4.941781832	5.36717583	4.949399156	4.994476603	4.745034943	4.854886021	4.86961333	5.03145868	5.150089153	4.859465453	5.015287077	4.840905069	4.856790686	5.084456498	5.224416721	5.132837822	5.240275181	5.282052423	5.286173125	5.390083567	4.653880917	5.198483224	5.353478219	5.145478796	5.43160158	5.497737953	5.181882198	5.317525738	5.504915754	5.19001895	5.172931451	5.365338908	5.571230095	5.157507296	5.10175678	5.145686047	5.337868875	4.983371565	5.046715998	5.128272434	5.056977698	5.211850462	5.341449946	5.04144965	5.091391783	5.970839786	5.777159143
10528	7.241296041	7.293342605	7.417633645	7.662173879	7.689972924	7.367153088	7.626356955	7.302392332	7.56737446	7.396563549	7.446359664	7.283810959	7.306605613	7.478140472	7.518785981	7.650347782	7.418264843	7.485576691	6.988559664	7.233263639	7.283015307	7.596752315	7.437078639	7.439136571	7.233590559	7.382680942	7.190980577	7.281981615	7.338459448	7.315508913	7.587196387	7.338874022	7.506103639	7.452380522	7.2677911	7.389541188	7.469395705	7.343830838	7.242596433	7.37879769	7.185472099	7.336997357	7.438041127	7.436006806	7.366462724	7.392802934	7.533229326	7.60799316	7.690365588
10529	5.93703938	5.539252603	5.522641721	5.701063351	5.155672549	5.697754228	5.200356913	5.677373242	5.336893606	5.679261949	5.437556726	5.710816747	5.564051966	5.309720565	5.353472384	5.607225723	5.532176515	5.761964885	5.526344437	5.511781693	5.543158887	5.457166804	5.353299785	5.74109866	6.010386353	5.289077798	5.745086553	6.067873234	5.736905741	5.543770613	6.082782797	5.757789148	5.708146237	5.678742717	5.678641059	5.801796827	5.860664234	5.690984181	5.703313963	5.449696527	5.603404071	5.781910872	5.676630048	5.730095026	5.718216861	5.777573969	5.792884682	8.49140001	8.286942971
1053	4.883453524	5.108031596	5.266801219	5.235943757	5.096128256	5.013607874	4.985565809	5.093989802	4.642999672	5.051067595	4.986438168	5.065261973	5.100736888	4.929282772	4.89634523	5.522407877	5.168483662	5.096339479	4.849141419	4.76311185	4.930586647	4.738738546	5.121647999	5.033173928	5.141617009	4.984122086	5.131793877	5.157869731	4.980031814	4.946172645	5.221723169	4.637525199	5.158770046	5.400225397	5.251238466	5.075889489	5.047670169	5.371101815	5.009932364	5.35132943	5.085297358	5.167152234	5.334544898	5.158241924	5.783712422	5.743807065	5.515081181	5.480997705	5.271111951
10531	5.929450276	6.908833178	6.72186207	7.054835972	6.262544713	6.860325767	6.997332832	6.784523389	6.782782571	6.903879993	6.911386984	6.955549435	6.78070083	6.673984014	6.836823151	6.844928152	6.940929307	6.651907036	7.115187066	7.025890161	6.811016958	6.892003971	6.81202238	6.987931498	6.781667523	6.695315692	7.624298601	7.115106855	6.547649857	7.007447815	6.819464307	6.930244874	6.756956088	6.88529599	7.059995499	6.530736396	7.014204396	6.724880625	7.066969879	7.07569876	6.82344847	6.787525503	6.271503132	6.872344208	6.69696291	6.571561274	6.119081649	7.388197132	8.410439179
10533	5.808072562	6.068861922	5.68518413	6.143022717	5.944408669	6.062152277	5.78542254	5.992869643	6.091847304	5.832235069	5.936655148	5.894489089	5.859846481	6.158655492	6.025769714	5.967821103	5.745685155	5.835159567	5.871856577	5.782050027	5.97365693	5.888214265	5.816443486	5.945122331	5.915678936	5.996314982	6.11601647	5.684880697	5.950418797	5.835812583	5.663523915	5.648120743	5.780225432	5.812221205	5.812416229	5.733147719	5.759647414	5.8674683	5.912778757	6.201097463	5.864974083	5.938684858	6.153628687	5.935102438	6.195305031	6.039209735	5.585941422	7.339743496	7.424651901
10534	6.846707982	6.734781255	6.424339068	7.097455276	7.298569818	6.737861527	6.483287676	6.668184966	6.754650684	6.67095151	6.955038666	6.655024834	6.261569134	6.845291989	6.60629467	6.547225222	6.631208222	6.197118635	6.79382861	6.634395329	6.69326616	6.568468856	6.921451892	6.516854485	6.64868332	6.621549645	7.217059814	6.81399315	6.618890683	6.435459629	6.634887411	6.817271155	6.647814822	6.850843499	6.882199701	6.911653196	6.629623249	6.650583368	6.867741977	6.661941264	6.895396372	6.450694143	6.700264041	6.423818515	6.545182444	6.974149868	6.857902101	6.84451608	6.893157174
10535	6.703046556	6.894538892	6.959802454	6.585468493	6.913400481	6.989817211	7.269492927	6.765812128	6.897555849	6.979681286	6.730526408	6.959850552	7.033510559	7.015745568	6.845941335	7.06867851	6.936937967	6.986452335	6.730096353	6.644424033	7.17593155	6.827188321	6.936259748	6.731445184	6.875059448	6.836791494	6.997851242	6.687258951	7.029475264	6.560989355	6.763503395	7.034222656	6.828580159	6.87132079	6.99412598	6.814946463	6.919056303	7.025059564	6.926304935	7.104484868	7.254868387	6.868566806	6.890235361	6.812299838	6.823535554	7.027134759	6.782238323	7.441567032	7.279583907
10536	4.757377967	5.068969323	5.145557532	5.316178339	4.917286906	4.9280237	4.85713799	5.022397595	4.887469256	4.87880047	4.891794583	4.82956342	5.132296962	4.870483574	4.988053695	5.244386272	4.844073492	5.235500931	4.719141581	4.833195913	4.826351634	4.640717499	4.935775378	5.016662951	4.901334546	4.87824871	5.131483035	4.929637865	4.828569757	5.004852705	5.095077353	4.804860398	5.070821771	4.771481071	5.224249126	4.999186987	5.002379517	5.228187547	4.942216954	5.146401301	4.903752707	4.947946632	5.269169388	4.929497436	4.92194332	5.106351155	5.068805833	5.71852531	5.881589548
10537	7.52769722	7.536349647	7.320057825	7.845387221	7.529440205	7.307257053	8.571736006	8.253959699	8.54536006	7.835994064	9.284146408	7.16714583	7.302710613	7.666449853	7.856701318	6.32284217	8.364961327	6.428683555	8.861817791	7.915200215	9.728732471	8.055860759	7.352812059	7.536781718	7.220479128	9.551240454	7.528680895	7.133157832	8.130801568	8.960185163	6.850547362	8.600889	5.576790099	5.297016256	6.108275935	6.715125141	6.612622824	5.780301226	6.665366933	6.620346084	8.575902088	5.780667706	6.858581228	6.238840636	6.832563386	6.101629056	6.169382917	7.762531437	7.972950792
10538	6.029705992	5.948385256	6.468249283	6.367167628	6.347458244	6.155900418	6.36472242	6.370541719	6.181134233	6.212323504	6.287546775	5.911149543	6.266551773	6.056548904	6.127578037	6.282148392	6.199913008	6.314076352	6.020167405	6.445161078	6.666028692	5.913488743	6.322085582	6.358213771	6.092532734	6.316824362	6.313199347	6.265367623	6.419707183	6.161655764	6.022212133	6.191431545	6.118608509	6.157708205	6.590135097	6.082789901	6.291742721	6.386712092	6.08160224	6.551880126	6.292196774	6.268614803	6.180295068	6.211180882	6.605540439	6.969356985	6.811372636	6.354895397	6.235023818
10539	6.877005481	7.059021424	7.060820404	7.257464066	7.064112367	7.057611343	7.077962174	7.021779586	6.93407005	7.043751132	7.092325354	7.014873439	6.905907344	7.095736433	7.198528521	6.867088133	7.006780833	7.105204933	7.022426421	6.844301265	7.028330422	6.934025809	7.059780331	7.001018892	7.045794276	6.999785825	7.06207685	6.927063264	6.98834455	6.844980063	7.068174657	6.908890283	7.219547198	7.091646301	7.267589006	7.093276031	6.99727806	7.116455699	7.112747187	7.095311213	7.273885785	7.110340234	7.083622663	7.089102676	7.048574132	6.949542603	7.318076213	7.022503195	7.140383425
1054	5.783925128	4.532014303	4.186175821	4.314570169	4.723750121	4.526268162	4.492465233	4.846280557	4.511913897	4.551267809	4.095318455	4.376141071	4.372677305	4.713032137	4.317416928	4.484225218	4.599500355	4.567964566	4.711830828	4.627519108	4.403232661	4.966730302	4.548753939	4.446715579	4.380162265	4.569622035	4.645124407	4.56503452	4.437375016	4.384698848	5.185090149	4.745412469	5.229597874	4.604353962	4.425630113	4.968882205	4.922289093	4.532472979	5.172827886	4.118440361	4.448073436	4.487421342	4.319562438	4.528433442	4.208483305	4.314225931	4.307477734	5.806095765	5.610936651
10540	9.486289431	9.611162479	9.535058372	9.264233041	9.784636859	9.480815812	9.83669104	9.363302055	9.477726475	9.789841788	9.497475009	9.438547812	9.659956528	9.688333962	9.688004808	9.533814304	9.657409589	9.741400179	9.501443624	9.46632324	9.517256236	9.498503118	9.850896706	9.523047156	9.324701183	9.395003465	9.725760315	9.643540999	9.584033811	9.395440893	9.89649541	9.858967486	9.541497324	9.526122934	9.80848119	9.492452329	9.760522886	9.691910853	9.552033533	9.806044812	10.00398292	9.577567107	9.654196542	9.564723151	9.450975416	9.868673113	9.72230774	10.79923014	10.71508266
10541	9.962318491	9.818261945	9.95510153	10.00687833	9.976976084	9.881379391	10.77098042	9.760089736	10.29485751	9.984039215	9.685161916	9.990209493	9.948324244	9.902513483	10.1039511	9.704193155	9.910712922	10.11932313	9.866410254	10.29093972	10.14581281	9.76273097	9.657692225	9.836736533	9.958297968	9.903386015	9.846850764	9.795004469	10.08623855	9.801151342	9.692233305	10.06735155	9.59940785	9.741863009	9.558463229	9.866310561	9.707357177	9.745620821	9.707823623	9.494683612	9.513784629	9.967253267	9.78874248	9.735664978	9.750113	9.153964178	9.6471721	10.94182853	10.8173947
10542	11.29910149	11.31001561	11.39191412	11.40646824	11.43419549	11.45720739	10.77785169	11.49118122	11.33992022	11.07426235	10.98695903	10.88686525	10.98532326	11.08793199	11.30253314	11.61822188	11.57178022	10.85755785	11.47526621	10.94698812	10.89254784	11.26009016	11.56915189	11.21730464	11.24555625	11.01558716	11.31482275	10.91540995	11.46349931	11.20041316	11.38413047	11.10666469	11.73711022	11.64371574	10.76379257	11.51771124	11.73634534	11.65275623	11.57767067	11.08383711	11.003016	11.0119496	11.36906313	11.21034487	11.13742901	11.3870349	11.3002007	10.91253197	10.9524533
10544	4.039079649	4.252484644	4.069481661	4.059121527	4.717188238	4.125853578	4.299723411	3.805515085	4.538177263	4.167983779	4.263761799	3.954016859	4.117800213	4.086388035	4.006008246	4.052118048	3.907739617	4.004389278	4.414352018	4.497072715	4.376692622	4.780452142	4.210710705	3.900970122	3.940994525	4.335648885	4.135082075	4.042418673	4.271069189	3.972520013	4.006008246	4.151390682	3.98747913	3.943981363	4.015177287	4.111806973	3.892801943	4.026573644	4.124887078	4.17873809	4.631396506	4.031468373	3.684650661	4.094863256	4.019038175	4.040829134	4.124889876	5.073983541	4.818749135
10548	7.699589027	7.699340208	7.659210853	7.580871623	7.689965933	7.663940428	7.993899927	7.730364929	7.819770591	7.783358922	7.732358534	7.892535669	7.518163333	7.917022797	7.675123216	7.199461798	7.850892586	7.873480015	8.000130047	7.975199187	8.020669336	8.368109862	7.019236154	7.811293296	7.753915573	7.936556256	7.868934273	7.722294484	7.723851478	7.775932813	7.693288936	8.198448634	7.612174331	7.589828219	8.023722289	7.835818046	7.590676389	7.56832268	7.769569444	7.574124134	8.089419749	7.430523203	7.571759963	7.567305039	7.211816745	7.296691108	7.22121922	9.796354136	9.690061937
10549	9.006846828	8.596927406	8.518168708	8.380803967	8.81066814	8.418994861	9.906594542	8.431003512	8.849732264	9.118710151	8.765818587	9.000305458	8.630774635	9.04659618	9.096517594	8.254910493	8.911047622	9.001484691	8.923746613	9.385219626	9.481390118	9.037022838	8.766438245	8.512525927	8.156519246	8.827380918	8.258678784	8.169628269	9.214284286	8.674620091	8.798390504	9.302248441	8.452839485	8.627768309	8.759980437	8.832414274	8.494787969	8.235675401	8.740986262	8.659366075	8.869565462	8.598077793	8.412449723	8.496997133	7.981831758	7.638958985	7.443975759	10.20138528	9.958100659
10550	9.641271934	9.5026238	9.550359988	9.89390338	9.646901992	9.112741968	10.63010635	10.01302708	10.42040014	9.510166203	10.27600651	10.28547123	9.172312258	9.547739811	9.646260044	9.283570948	9.751672552	10.39277519	9.887568186	10.21357279	10.50510758	9.670382735	9.601870391	9.062995815	9.383632632	10.42832973	9.478556767	9.278200805	10.00735536	9.678426395	9.633332481	10.30313419	9.380410618	8.778962032	9.694807931	9.395697041	9.388274701	9.294988168	9.096598894	9.455079797	9.229586368	9.517948881	8.976633409	9.396122585	9.149826712	8.92254617	9.055635582	9.95322788	10.03425985
10551	4.992019372	4.52844298	4.614227802	4.408296185	4.899409171	4.9879608	7.263186187	5.475001333	5.9550098	5.124883233	5.610926333	7.63115217	5.002140257	4.81891429	5.17804781	4.720091915	5.224705672	7.477146148	4.839648364	5.632170268	5.191844737	5.858210807	4.788695525	4.930530036	4.615866057	5.812247104	5.255200402	5.050421769	5.651430022	5.356425309	5.434414819	5.263171956	4.791660305	4.613435552	5.500593049	4.797955555	4.432189656	5.097873302	4.623601193	4.684692055	4.888275326	4.926984957	5.578351431	4.732196948	5.058950737	4.445033022	4.714689567	4.469578149	4.312194465
10552	8.980133446	9.229224019	9.116694844	9.077542101	8.884892631	8.96544254	8.872404741	8.637038374	8.935703536	8.900785893	9.013124856	8.962391682	8.59552017	9.065022894	8.939261604	8.58947942	9.099278625	8.842761773	9.045877953	9.149272304	8.761180444	9.211341576	8.5975964	8.858154514	8.978552795	8.91634219	9.222541898	9.132213221	8.847731927	8.913133504	9.240439081	9.227134299	9.100275513	9.190159131	9.148273823	9.008334871	8.803576443	8.910458305	8.985711565	8.801430187	9.223699361	8.885136039	8.782977123	8.907431072	8.521155061	7.952040174	8.709956788	11.4157886	11.12827902
10553	7.223326853	7.933465581	7.339398145	7.324795903	7.472030035	7.063376112	7.611678112	6.93499473	7.560323464	7.967200517	7.837977247	6.877310733	7.399687281	7.958780496	7.86445864	7.101841065	7.290408772	7.544122967	7.718469623	7.663749755	7.907205947	7.951641076	7.452996304	7.303957779	6.9467664	8.014251552	7.480208767	6.947050912	7.417242459	7.768058607	7.333282905	7.937509986	6.901805823	7.170469594	7.251958795	6.874516644	7.361819731	7.204752175	7.264415493	7.55889832	8.190879019	7.154358692	7.319207019	6.493118052	7.167731595	6.014674045	6.445321934	9.739163336	9.761605616
10554	7.26024243	7.631877347	7.609016855	7.789840123	7.539824144	7.607346095	7.188053437	7.655506015	7.320883184	7.651728548	7.513371224	7.686793591	7.725321219	7.589254566	7.539116595	7.766320555	7.581611945	7.385162018	7.43877895	7.150970276	7.229869668	7.433077938	7.675401343	7.64814779	7.6380726	7.41412615	7.63905317	7.419247658	7.351602907	7.506018838	7.580807914	7.499302352	7.640390238	7.656708644	7.557136041	7.521259321	7.605083804	7.556695353	7.476639212	7.692429935	7.553728058	7.356333949	7.673289658	7.484323768	7.493697125	7.53161287	7.437958583	8.902653174	8.733483694
10555	7.161250819	6.289068795	6.538058107	6.584777225	6.306153278	6.474253173	6.36495468	6.605045874	6.3479982	6.120994568	6.534537131	6.665278319	6.457163353	6.283639833	6.33022618	6.456156439	6.353873463	6.432192207	6.062819638	6.421639779	6.390510505	6.512854324	6.256007031	6.556330862	6.616871622	6.394524972	6.624576144	6.77460819	6.754530988	6.700440116	6.797606108	6.721129843	6.44264746	6.29422083	6.404379701	6.279474242	6.315365345	6.196892788	6.225823364	6.504553876	6.682006063	6.557939233	6.190747276	6.349222092	6.521978837	6.727489371	6.653779668	6.753824175	6.580516827
10556	7.551881254	7.600307249	7.380894822	7.328636296	7.333856453	7.26165405	7.507415001	7.466509284	7.400605288	7.534160875	7.510681331	7.474951546	7.170929792	7.51278416	7.503289212	7.508112323	7.477737351	7.431914388	7.454359199	7.586863963	7.566308891	7.648988942	7.62552181	7.252110876	7.291977422	7.168316988	7.2639658	7.449996885	7.452880493	7.237479529	7.128980264	7.403317211	7.381707452	7.442975107	7.34241458	7.219418016	7.015594054	7.335421854	7.441966948	7.42155875	7.804279149	7.404390153	7.312466075	7.181674593	7.060028361	7.030678823	7.041401804	7.304241958	7.50801528
10557	6.441193784	6.612336149	6.444201305	6.553839419	6.514748509	6.484202446	6.564084466	6.518506062	6.342902585	6.371068237	6.885899556	6.56743199	6.258144207	6.52702637	6.487534117	6.575123586	6.347515664	6.254381801	6.391092325	6.399773297	6.509741081	6.361185768	6.676483753	6.473793631	6.114705364	6.328158614	6.434666833	6.457593615	6.434820211	6.551128444	6.471285344	6.496316211	6.510730566	6.510594394	6.633282271	6.383941831	6.770010947	6.23009104	6.563448147	6.554254415	6.571193323	6.574847428	6.398917259	6.575190799	6.405699699	6.81354433	6.521714931	7.501414733	7.441609692
10558	8.360866815	8.251638124	8.2562526	7.989955096	8.0284172	8.186250734	8.465256001	8.151127512	8.380087672	8.195358807	8.24696803	8.326039813	8.084204574	8.182458115	8.015436058	7.632456078	8.177927273	7.958459781	8.318223288	8.125363327	8.217519341	8.487863419	7.902391173	8.000089943	8.142253376	8.338643663	8.136486143	8.005252748	8.342653064	8.319242962	8.074405321	8.491834338	8.003101963	8.053800639	8.24698395	8.141629368	8.223883667	7.995632818	8.244182366	8.123322795	8.210236803	8.163791976	8.180493125	8.168455176	7.752478836	7.791483981	7.832680496	9.516990163	9.267881486
10559	7.575554053	7.262714	6.895693607	6.696809509	6.870256305	7.091610138	7.043172092	6.975147347	7.165242938	7.022432935	7.014172524	7.227663561	7.062083302	7.425216381	6.994562932	6.598048725	6.927455921	6.874276534	7.372257858	7.344746816	7.011862041	7.372688042	7.467060515	6.939423485	6.996047585	7.304842843	6.640452721	6.914381135	6.991072226	6.890506895	6.872218744	7.035508205	6.592973664	6.716386118	6.366329794	7.13672439	6.89824614	7.291347257	7.235248438	6.50536693	6.806170745	6.791541261	6.759722104	6.762748757	6.548274592	5.887579775	6.560963494	9.916245915	9.579301398
1056	4.353320725	4.30625294	4.673821603	4.666924413	4.130103168	4.600670713	4.038570501	4.209228112	4.143190465	4.173632327	4.221300825	4.124665317	4.559059878	4.431886023	4.518686663	4.724750836	4.311276686	4.30509536	4.24415975	4.055316333	4.047651908	4.153200979	4.427740209	4.389105917	4.645549587	4.149327534	4.334713012	4.289438146	4.197415853	4.191963573	4.192742034	4.087572447	4.711965469	4.391673878	4.264277503	4.657205741	4.750377039	4.611338624	4.504275652	4.762866092	4.339967046	4.598790564	4.436106274	4.362861142	4.923993878	4.684394927	5.171612982	4.643068317	4.665161671
10560	5.903391517	5.403693512	5.504963808	5.009940056	5.640999924	5.647816848	4.752175105	5.56326639	6.114154129	5.449042487	5.328428131	5.391166466	5.789512651	5.89319898	5.288366336	5.624303937	6.108189176	5.18453966	5.704274854	5.325834472	5.339002947	5.16956024	5.721580782	5.746420781	6.055083798	5.661213602	4.950568107	6.148347047	5.437800383	5.546399666	5.752128642	5.395228575	6.026044146	6.185208898	5.387670933	6.62468048	6.399512854	6.488527465	6.984238394	6.184256419	5.574570335	7.335661976	6.868222704	7.155111101	6.513445823	6.230310194	5.438765773	4.887618179	4.750348974
10561	7.093484357	7.83250208	5.031426525	6.637680399	7.211954024	6.960759194	7.013021383	8.490278675	8.640617761	7.272561604	8.247814167	6.931254047	6.616012818	5.720496091	5.363707367	6.177071771	6.54818289	5.99475771	8.473787766	8.601637143	8.685259917	9.219934396	8.642646727	8.600164404	7.528757118	8.198665899	7.184325031	7.623140519	7.248070907	8.905370424	6.648715224	7.737401715	4.286943548	4.157420983	4.589614758	4.179676372	4.218313253	4.427022196	4.406323644	4.489911184	4.547381861	4.165692903	4.338706782	4.66952755	4.506680543	4.735960822	4.443455084	11.12358079	11.35850068
10562	4.405066826	4.740066865	4.339738754	4.056123826	3.872807002	4.511489488	7.50718292	3.65276916	6.136679658	3.784001927	6.652420612	4.592685133	7.330987422	4.84405799	5.931664051	3.816936963	5.9807929	6.173958153	4.29556002	4.174340611	6.466208458	7.601969412	5.091758999	4.192776777	3.939469545	4.456188885	5.045467042	4.237282751	6.889219536	4.823855562	3.906515357	5.238050317	4.186099761	3.926098968	7.245099014	4.232534815	4.50794531	4.455836655	4.086854549	4.700124502	5.272329606	4.728516828	3.759658036	4.280845603	3.980691531	3.886030688	3.753594633	4.301728998	3.93538834
10563	3.946164287	3.612671531	3.756319168	3.650539157	3.750495249	3.71509259	6.827034431	3.851859659	3.727919206	3.862433376	3.717345035	3.654024008	3.777623222	3.677794661	3.73091904	3.852584677	3.688214282	3.767594516	3.666283459	3.802812555	6.491637804	3.636136924	3.753622565	3.871388065	3.859221002	3.619456168	3.763166607	3.815184837	4.201950704	3.745817446	3.715076278	3.630414412	3.733706974	3.727761846	4.02211272	3.855977147	3.615795004	3.781089978	3.63937863	3.784251048	3.762931998	3.673647131	3.784075381	3.705087228	3.988154401	3.717624587	3.766826649	4.089761123	4.283471821
10564	4.467037053	4.374614746	4.355800757	4.61705463	4.203179951	4.814914188	4.250450515	4.489090207	4.427135559	4.541491552	4.630489574	4.298721702	4.531623901	4.490741576	4.44672958	4.685377461	4.586142749	4.616486933	4.642968337	4.674588634	4.586882434	4.707792276	4.580142458	4.539260823	4.678304224	4.749387359	4.560381868	4.470981843	4.588781519	4.697493311	4.603289092	4.717196639	4.597113604	4.621900394	4.619216318	4.581450506	4.771356207	4.493303526	4.764048877	4.354008141	4.571954842	4.685364702	4.637633485	4.519521953	4.56894536	4.417783093	4.585212103	4.936293043	4.827285662
10565	7.258240681	7.201355524	7.109652174	7.207907218	7.149606989	7.373354489	7.227529369	7.204790235	7.141961632	7.2645856	6.910517093	7.290982797	7.090683057	7.436479631	7.340808115	6.993403117	7.361078771	7.543447989	7.293399523	7.45955153	7.34024063	7.342179817	7.073381787	7.418746958	7.530140091	7.446680932	7.491301397	7.358930695	7.30074034	7.338522744	7.271505638	7.365965847	7.107654547	7.151174539	7.171599411	7.408916861	7.214881828	7.145362895	7.422578479	6.929509947	7.057284325	7.27816122	7.176311879	7.023473852	7.004624318	6.881302072	6.895862241	8.264589084	7.973570585
10566	4.956149864	4.926495958	4.809554849	5.088047241	4.742682547	5.08446689	4.698273285	5.173735593	4.99277687	5.181443817	4.816164821	5.048391838	4.953584518	4.838227768	4.989674823	5.292354816	5.050054052	5.050939427	4.993297931	4.798215825	4.921121592	4.672041987	5.027440658	5.188917507	5.169593517	4.718276599	4.908547917	5.009772344	4.841833554	4.719500367	5.355816436	4.969151964	4.919955445	5.209621527	4.913402275	5.028384781	4.901269258	5.304432714	4.977251788	4.795716538	5.330708072	5.295876882	5.274511536	4.847472941	5.145900185	5.361081816	5.257883784	5.429232271	5.453438281
10567	9.208316288	9.217833708	9.358511173	9.09378993	9.000805345	9.057892501	9.270882103	9.051481902	9.15671214	9.1497508	9.238117588	9.284553923	8.933130684	9.159863069	8.891083233	9.015094088	9.10543792	8.855962647	9.417251337	9.348355347	9.367379526	9.591659987	9.363473983	8.914826886	8.975262946	9.061317196	8.64644237	8.987698231	9.078391592	9.17178736	9.232836517	9.329530032	9.200243837	9.249076627	9.843739271	9.261804657	9.269724244	8.677425326	9.363754834	9.061140931	9.611320639	9.13919886	9.19543769	9.126787276	9.138175127	8.471224517	9.018233804	10.84109995	10.64263308
1057	5.249667568	5.633715841	5.85216497	5.600437948	5.343484481	5.579836211	5.106084198	5.29830584	5.148406128	5.299380307	5.301191806	5.351258398	5.620994349	5.150275238	5.199589692	5.746446916	5.411883214	5.708907886	5.217365474	5.323995453	5.264291242	5.090387371	5.630649522	5.626663363	5.755277948	5.077949877	5.366406817	5.39274438	5.331377684	5.483198069	5.743600398	4.997230313	5.945966926	5.556998612	5.52164516	5.528743712	5.694961541	5.804131837	5.400199998	5.5360811	5.553663596	5.779100911	5.619344837	5.470948273	5.441151601	5.928466498	5.617421561	5.804744128	6.192295783
10570	3.903662028	3.932361862	4.121746011	4.216162562	4.089676651	3.925706679	4.0402036	4.089403012	3.973745637	4.000284447	3.992909954	3.96707727	4.108969406	4.030336829	4.051887914	4.250199991	4.015712364	4.008547074	3.836904753	3.896110106	4.021930579	3.947973577	4.115115432	4.063194201	4.006639894	3.954213795	4.021320672	4.064457049	4.096785924	4.16728099	4.114415363	3.949116459	4.070164389	4.231366062	4.301423969	3.96518995	3.950196562	4.043644074	4.103669236	4.175388833	4.004828501	4.044213496	4.060807101	4.087080305	4.448118976	4.312855984	4.238590308	4.56709744	4.498517036
10572	7.353675817	7.4435508	7.269886653	7.674828466	7.918769143	7.234357393	7.340015687	7.139883275	7.28067682	7.478910541	7.051365759	7.306159099	7.023151414	7.588074318	7.577703999	7.746113681	7.274302514	6.976933152	7.268703601	7.669100219	7.109226463	7.258823917	7.672982755	7.253903593	7.233866712	7.177764678	7.626558943	7.207595467	7.433978102	7.089248131	7.189323233	7.290631304	7.534701002	7.356505741	6.812394426	7.704548408	7.611658469	7.407322205	7.42263537	7.40042012	6.885795902	7.155430388	7.031210141	7.047682444	7.370409379	7.313266478	7.122097044	8.004841095	7.867104103
10573	7.305516827	7.075699018	6.998104013	7.486311659	7.52213355	7.115497769	7.233618943	6.996494038	6.954784287	7.059243019	7.064954655	7.108016839	6.894025388	7.210478602	7.334134278	7.22406968	6.806440476	6.924349443	7.161761859	6.882531256	7.05918215	7.101218773	7.239844944	7.150195414	7.253919306	6.845810695	7.673949172	7.337218242	6.978519644	6.858371279	7.26432586	7.275930704	6.976837873	7.281501706	7.250630844	7.145569548	7.152195017	7.223360653	6.990923762	7.393740397	7.549651733	7.107468088	6.843425543	6.928090551	7.194361565	7.466005374	7.307141681	9.38362959	9.071236096
10574	9.425369794	9.234549133	9.275902338	9.178959617	9.336933059	9.409981199	9.617169827	9.141680968	9.361104917	9.458905737	9.511059656	9.342341152	9.018399984	9.560489309	9.373656114	9.138565878	9.280912471	9.357010886	9.371050749	9.387501545	9.561434945	9.400486707	9.100332513	9.187169444	9.245798727	9.19502752	9.040723139	9.444226943	9.23630755	9.3741996	9.447476272	9.406032906	9.16710305	9.2833668	9.381555513	9.244258346	9.328137119	9.359475042	9.251851588	9.341281809	9.550812998	9.322615023	9.41702072	9.173041529	9.091567637	9.298969491	9.278661588	11.41274153	11.13716875
10575	9.938036937	9.993819813	9.890094139	9.800082132	9.877758171	9.954063768	10.05835037	9.726238938	9.64775797	9.881770205	9.785174431	9.96330666	9.545589757	10.01547501	9.989178208	9.814707871	9.806570014	10.00740008	9.893367077	9.902901809	9.949211299	9.825195829	9.74721053	9.658267862	9.669410357	9.834710504	9.921702255	9.877345179	9.819576492	9.756383281	9.828494433	9.957292035	9.720597459	9.858368478	9.769734651	9.824155614	9.828816929	9.89635716	9.779626323	9.863066457	9.856341886	9.777515817	9.719067709	9.613985861	9.364063816	9.346757808	9.296662345	11.32693091	11.23061735
10576	9.472346702	9.387271772	9.416810269	9.518401819	9.689076967	9.485692734	10.01585857	9.317013736	9.663871505	9.305914067	9.91675185	9.722625307	9.166547572	9.851859984	9.57844137	9.060564547	9.434571561	9.528034444	9.637000962	9.478441021	9.731717516	9.737426082	9.338451358	9.41732608	9.363661536	9.935191894	9.077654873	9.590744591	9.490590895	9.525005719	9.46982603	9.738500577	9.453799801	9.451926562	9.295990618	9.674061822	9.44563981	9.567909278	9.608022	9.064131235	9.453021998	9.291892772	9.330130101	9.19722664	9.210956824	8.65505058	9.043679605	9.897823097	9.910925134
10577	10.43130963	10.90247138	10.7807755	11.02189034	10.96803129	11.02099709	11.23106145	10.68572946	10.91964087	11.23098666	10.96691242	11.03637481	10.79655455	11.13814858	11.02457062	10.62384087	11.03465838	11.03171104	11.0979456	10.76401194	10.95909744	10.65614937	10.88862017	10.65125794	10.46381433	10.96492335	10.63355042	10.33728984	10.8673548	10.63118615	10.55556741	11.01941359	10.69033781	10.66279854	10.28150975	10.80555161	10.74765976	10.30716421	10.62518849	10.84209761	10.40260843	10.15763205	10.55906082	10.61670703	10.6186252	10.6662429	10.62625421	11.58499265	11.57622373
10578	4.619432249	4.510242182	4.667728443	4.824635146	4.616258607	4.742962499	4.682748965	4.704524725	4.426092119	4.698379443	4.772493903	4.581479625	4.490646137	4.639392382	4.658599131	4.810052364	4.411021675	4.769284016	4.519965251	4.700224158	5.041498173	4.781841784	4.626133715	4.601724784	4.651955323	4.523504607	4.941715533	4.6778151	4.550925615	4.567304386	4.650797364	4.720527777	4.615913208	4.705772322	4.935866723	4.701755848	4.476194227	4.628773369	4.52384175	4.681597365	4.567965067	4.682072432	4.668960492	4.661919714	4.986990127	4.865748329	4.820031902	7.284260414	5.646150499
10579	6.434243212	6.663261056	6.495254144	6.746818847	6.275043392	6.385294111	6.389479631	6.206072515	6.7119412	6.599547187	6.444918737	6.588692701	7.278893672	6.892744993	6.438343233	6.877490124	6.884221093	6.598830847	6.600860674	6.556164291	6.35958688	6.588585814	6.88921927	6.513792782	6.518323373	7.210852243	7.105012524	6.877892321	6.775475738	6.573808824	6.962263126	6.425249852	6.89818075	6.421636021	5.970070355	6.58885471	6.543522733	7.026035465	6.526928045	6.78607541	7.254913596	7.200781242	6.859756886	7.394081468	7.25446633	7.747081472	7.435984657	9.009986264	9.084350692
1058	3.960470743	4.194372244	4.000178494	4.348003301	4.252352964	4.08995397	4.335909226	4.233229605	4.16432623	4.27709819	4.295079417	4.057852141	4.160994151	4.262553695	3.995546193	4.642170559	4.136339193	4.22537115	4.045584759	4.019434657	4.387313442	4.138260718	4.218922229	4.18466514	4.201575287	4.175810476	4.012492119	4.104992637	4.084511079	4.084239199	4.291902758	4.292604742	4.16525511	4.228160548	4.164132675	4.015697325	4.157320598	4.215852518	4.099156819	4.10664038	4.178280473	4.070251116	4.139197706	4.177384412	4.224561402	4.325455368	4.158924021	4.694474931	4.897937974
10580	4.569954832	4.633647746	4.638331998	4.476638082	4.402746633	4.520688237	4.336688709	4.563576096	4.262762831	4.41433174	4.50642781	4.556590237	4.651707072	4.599098725	4.529526442	4.623311055	4.633257149	4.398447662	4.51587277	4.347987432	4.414489938	4.404176353	4.455670799	4.488841401	4.42950521	4.456504627	4.573053676	4.579663406	4.390641228	4.546162731	4.596968601	4.502323876	4.587097702	4.548222574	4.438044006	4.541347305	4.602976042	4.580110547	4.519423687	4.556440762	4.472216201	4.505028379	4.641631397	4.585234703	4.756004282	4.419965829	4.476201863	5.056256738	4.979991023
10581	9.694005436	10.03080974	9.455460738	9.933492575	10.50201414	9.3526987	11.74603028	10.50373824	11.12138318	10.32460443	11.59644039	10.35079534	10.60421748	9.851985994	10.61969608	9.514488895	10.10225724	10.95794772	10.46783157	11.34070971	11.0875318	11.71982643	10.26984463	10.26709784	9.766539262	10.59530595	10.71073731	10.83156973	10.87624037	10.62126256	9.439834622	10.62102676	9.133828548	8.886799928	11.86207252	8.600743301	9.197937075	9.084242261	9.214104108	9.632525755	11.38827618	9.001704164	8.829112124	9.325857759	8.941510903	9.364803692	9.1551826	13.47725764	13.57703816
10584	3.940884035	4.042366327	3.791914001	4.173612717	3.919790167	4.068391164	3.81752485	3.860812768	3.605425281	3.985260996	3.784505571	3.890363537	3.987408586	3.987299855	4.156408072	4.367520649	3.70973653	4.046765492	3.766233087	3.876551174	3.799152993	3.836680599	3.871559431	4.071212309	3.973306834	3.723390745	3.911311185	3.960487006	3.912387209	3.997364495	3.970861915	3.817213838	4.018051028	4.19609838	4.08173032	4.155118808	3.837102793	3.916240472	3.814696549	3.993572971	3.858690635	4.182250748	4.181517608	4.134878022	4.066563597	4.343704858	4.236938878	4.644211418	4.714077123
10585	6.238126946	6.309443052	6.09091972	6.471116364	6.653864158	5.779006347	5.960273958	6.021862746	6.078238772	5.973725516	5.673556374	5.70863452	6.317757792	6.181218856	5.867702632	6.311120084	6.209274198	5.92932858	6.245402989	5.786575821	6.043016775	5.727146962	6.238656297	6.36383587	6.301542276	6.045866838	6.625699042	6.065640059	6.007205281	6.105882145	6.182829612	6.173204643	5.988509053	6.128167124	5.788254994	6.336503946	6.066279464	6.349926472	6.090326968	5.977162505	6.23428688	6.198744808	6.140059482	6.136074783	6.199440365	6.035625246	6.347070773	8.289956328	7.81656082
10586	3.745580468	3.918829662	3.74047232	3.845760395	3.846448449	3.757593125	3.699549639	3.818046101	3.697073764	3.693195964	3.770776473	3.749704346	3.817091927	3.73762884	3.827183411	3.811810984	3.79765989	3.770477741	3.717300202	3.7227513	3.757745078	3.657633328	3.770556636	3.802120555	3.779206923	3.832199909	3.819166622	3.79405527	3.755848492	3.91202956	3.698602432	3.635221609	3.830004166	3.767337089	4.029302481	3.767283619	3.73787495	3.744172833	3.663091201	3.820202413	3.793623629	3.857290001	3.833458233	3.826310153	3.844173432	4.120310048	3.918919259	4.309408217	4.407328775
10587	6.308108744	6.186481951	6.282646186	6.51758284	6.273949677	6.446447015	5.924239395	6.048293919	5.786037044	6.24014136	6.009068355	6.470754093	6.231278702	6.501356468	6.607400516	6.447790587	6.387931313	6.023830799	6.033330704	5.863373453	6.071614957	5.992579931	5.971911146	6.180092411	6.34859546	6.021375072	6.669118786	6.206674769	6.109206359	6.214682312	6.472585762	6.378208611	6.654291798	6.39896047	6.233242819	6.697934293	6.731282381	6.504193161	6.366504308	6.319647558	6.515603076	6.306913542	6.337892791	6.581256276	6.190432267	6.34000185	6.59204288	9.269334973	8.764422905
10588	8.697811364	9.335878673	9.423656142	9.286435116	8.90853102	9.05100415	8.489721419	8.817219729	8.764913605	9.268048026	8.97807606	9.023604188	9.06098259	9.159614748	8.557577129	9.173684743	8.901595329	8.754054388	9.145907227	8.67673592	8.646055343	8.88007838	9.190176119	8.970136622	8.95550643	8.643852588	9.195832942	8.380945955	8.548028693	8.830227067	9.354580545	8.69381896	9.728892849	9.347309262	9.341179663	9.390972881	9.218618819	9.328906606	9.23688083	9.333861628	9.365392829	9.471730384	9.251165753	9.315356139	9.550828512	9.481530075	9.452279695	7.297972599	7.604561
10589	6.664212543	6.759558193	6.669189735	6.858437498	6.60525929	6.609507138	6.847144939	6.468334806	6.679626774	6.896152428	6.815558161	6.751713168	6.532502762	6.793616887	6.602993055	6.499858708	6.737538386	6.485952595	6.5727845	6.798626989	6.865012551	6.801457755	7.025295638	6.649608089	6.819517329	6.628762408	6.978284305	6.578525462	6.508017127	6.676890201	6.987170014	6.768463296	6.822403006	6.711848802	7.054712306	6.708350797	6.736094139	6.479290238	6.797181551	6.576147398	6.65009915	6.928433767	6.75031196	6.687712703	6.678868157	6.798654244	6.433027133	7.527659948	7.143626443
1059	4.338582244	4.34651932	4.368961342	4.222153486	4.38508455	4.466842573	4.204079309	4.297691601	4.294958273	4.555458622	4.202810081	4.239562849	4.513923764	4.115488799	4.380967084	4.236409123	4.478180631	4.384775118	4.362563185	4.238096877	4.055602968	4.234702103	4.324632819	4.324913462	4.178373364	3.972063905	4.250781326	4.37219055	4.415891526	4.273425913	4.107576708	4.429080856	4.540646187	4.439697011	4.342969838	4.382252635	4.319095019	4.59538023	4.432744079	4.442247615	4.711018469	4.489905305	4.476928727	4.47143455	4.505010267	4.689456025	4.31407659	6.172017552	6.02331952
10590	5.42567114	5.160783333	5.041610298	5.598372817	5.006188214	5.198629445	5.217205868	5.296307079	5.34150263	5.478999143	5.176232415	5.187834517	5.296509515	5.562749307	5.114068282	5.42572408	5.285070291	5.504873429	5.380150527	5.303031157	5.549409101	5.091461268	5.268254759	5.256675517	5.63279097	5.498693641	5.413160653	5.387534296	5.415173509	5.121879951	5.309569436	5.188507889	5.21789866	5.356743115	5.951084454	5.313190092	5.174934861	5.424181935	5.373839014	5.780942429	5.559654413	5.260466002	5.452754776	5.49471392	5.494284824	6.20650301	5.549536764	5.809160255	5.790616515
10591	9.867234816	9.747014805	9.854287331	9.897084148	9.81417335	9.805289625	9.165439992	9.804801972	9.510168746	9.866152889	9.532350472	9.660040789	9.366863006	9.839812011	9.504739388	10.05279771	9.663619805	9.066964497	9.70971563	8.943534483	9.553549839	9.554638572	9.822894979	9.631880192	9.332205499	9.395789004	9.777017826	9.342232027	9.377420491	9.45813274	9.816707971	9.346228489	9.825426528	9.835018998	9.505599454	9.878466579	9.858802964	9.744512052	9.727227768	9.816233464	9.25624138	9.67383087	9.754590275	9.60043944	9.823596753	10.04457845	10.0318622	8.061629985	8.260486771
10592	5.456359839	5.501780637	4.945223515	4.440489221	5.398139277	5.243967898	5.549384506	5.256463754	5.181769144	5.297335181	5.244961767	5.126677831	5.163514203	5.29644608	5.229177397	4.850734623	5.408462566	5.418580422	5.753316267	5.107717796	5.615020217	5.400225821	5.086952101	5.411303847	5.311885642	5.459720759	5.468030182	5.225934102	5.372168892	5.141054107	5.321170173	5.793367614	5.247579781	5.295912259	5.249121767	5.319242845	5.312999101	5.620708584	5.130679121	5.13830686	5.36036046	5.215095557	5.283699466	5.347603183	4.956304775	4.931868384	4.849100029	6.471121706	6.662143362
10594	7.73322453	7.475870079	7.369486839	7.202821704	7.3226072	7.462451035	7.886772349	7.461178458	7.347471454	7.602998091	7.200966311	7.659074078	7.773825813	7.53603109	7.418792644	7.715472306	7.511436478	7.393754579	7.392349446	7.4824977	7.479365063	7.451699013	7.338704705	7.84801477	7.478325002	7.23276888	7.881265427	7.600945731	7.58994191	7.548808778	7.473771723	7.603252212	7.499309996	7.683440092	6.801651651	7.553122984	7.759869701	7.78488146	7.626699556	7.529703336	7.532546724	7.543038791	7.509164212	7.452808269	7.354231198	7.772278159	7.443583714	8.882567283	8.43136816
10595	6.007350362	6.056439388	6.177934174	6.423544157	6.006101216	6.073731178	5.849741069	5.828538736	5.968862972	6.321390649	6.034022821	5.691203633	6.352753545	6.09169783	6.230734391	6.606847249	6.029994353	6.221714878	6.052830225	6.12545693	5.60252274	5.851579928	6.17459423	6.071421772	6.227431248	5.968633396	6.327908665	6.087584592	5.852944219	6.011564235	6.355974215	5.723362158	6.20643043	6.131454998	6.415561236	6.077909753	6.238601065	6.298548958	6.007351836	6.420111844	6.254201395	6.219484323	6.175559941	6.287338681	6.615828296	6.625259835	6.422738411	6.078270672	6.138975206
10598	8.553272875	8.356013453	8.387728097	8.715320723	8.657131358	8.195789057	8.496010849	8.497515311	8.224320113	8.270917812	8.242809851	8.663096946	8.346395569	8.55243636	8.343387421	8.480081673	8.167003956	8.258305769	8.495597815	8.483559002	8.274592915	8.479883426	8.534214504	8.389484673	8.200723998	8.489907144	8.325673807	8.424456175	8.260954337	8.622440366	8.491154101	8.267044702	8.471946231	8.419584928	8.199881485	8.344371931	8.478682954	8.367191406	8.428834148	8.660901613	8.416105699	8.172466152	8.350467446	8.177739587	7.836419681	7.791960928	7.98464378	10.48416415	10.3198263
10599	3.781408217	3.702067269	3.800274895	4.098268411	3.842384039	3.901165622	3.738524516	3.971846764	3.743396448	3.841270213	3.848694748	3.872287919	3.971012875	3.811844576	3.92944565	3.892607701	3.882509122	3.80040828	3.666684088	3.965616588	3.901673482	3.84092556	3.975488637	3.925390333	3.802777378	3.799918341	3.806823384	3.916806034	3.90653659	3.740735967	4.224440739	3.790249458	3.985382056	4.158703678	4.204866134	3.848578457	3.78904511	3.901532008	3.799300051	4.017933176	3.953739083	3.877778278	4.108028227	4.162219113	4.140191014	4.156536689	4.176800697	4.429494452	4.283346557
1060	5.323772112	5.265325343	5.340318834	5.406464247	5.21940945	5.156369088	5.642029281	5.310196274	5.597150535	5.409173423	4.789056599	5.231453625	5.227469146	5.297040449	5.294177115	5.694335165	5.345958696	4.943551206	5.197201843	5.163938472	5.164798411	5.191616272	5.681455223	5.153037137	5.283521317	5.692088157	4.872355301	5.444928862	5.366863959	5.133704854	5.328460159	5.108292285	5.12463121	5.391918597	5.276030312	5.318674216	5.380469028	5.288002844	5.238249558	5.346292357	4.936395323	5.527859425	5.304586585	5.161862726	5.008742455	5.127989967	5.458230709	6.475914863	6.083320717
10600	7.604966086	7.411198613	7.413149328	7.347308855	7.330556381	7.210743537	7.634070387	6.966951319	7.269306802	7.470380861	6.972659541	7.389719255	7.413609691	7.634151816	7.396089853	6.821001806	7.472379461	7.45101747	7.307785012	7.529188283	7.227267588	7.28060781	6.862166721	7.223828375	7.201946001	7.373241489	7.4025314	7.066727159	7.057509299	6.9290826	7.209686603	7.095521778	7.139338975	7.034877819	6.628640355	7.273840308	7.236718552	7.225427089	7.229711319	7.30799886	7.661211903	7.06900786	7.229827141	7.202037123	6.491580241	6.745860791	6.349271671	9.342915888	9.120113827
10602	4.980302173	5.492979767	5.242813792	7.06815369	5.456611111	5.086328112	5.519840332	5.239389251	5.446928143	5.155044691	5.22240675	4.823510161	5.565758042	5.113994097	5.484383067	5.378075585	5.252173966	5.573274356	5.489349335	6.266596752	5.431047418	5.523586816	5.197146528	5.28240188	5.471243427	5.31296764	5.70258803	5.272612585	5.887239221	5.246388281	4.760557234	5.142911445	5.26514281	5.030310205	5.059268505	5.319286531	5.715150851	5.261856187	5.090258632	5.367078098	5.323299663	5.517670057	4.989180214	5.384637022	5.349316036	5.04055591	5.172328191	10.33360955	10.064438
10603	5.167087896	5.151170998	5.404225222	5.567567687	5.256140995	5.423422462	5.371499417	5.607739256	5.525533734	5.568887738	5.644102452	5.233297975	5.531255692	5.233481139	5.574156172	5.42741162	5.365119343	5.327801628	5.136117331	5.353841226	5.50113773	5.591290383	5.611354764	5.531516997	5.813853434	5.384373736	5.634450149	5.659880731	5.461539285	5.785797958	5.255722473	5.491421359	5.489092092	5.51499423	5.828279291	5.53830209	5.488618232	5.454800055	5.37921124	5.411787053	5.580652862	5.452644958	5.653131627	5.544489863	5.46264068	5.747392908	5.735666661	6.279052947	6.102538785
10605	6.634438134	6.910046659	6.473694009	6.396641066	6.808276138	6.624025123	6.87333142	6.48675236	6.398456593	6.838938452	6.729439252	6.509326581	6.177881345	6.41161867	6.539646742	6.657985472	6.662152167	6.132613982	6.533192195	6.250921716	6.294617164	6.356258895	7.330546736	6.575525552	6.701588545	6.616162187	6.867186668	6.347244917	6.159221821	6.290241658	6.767846159	6.566594375	6.473837541	6.410649619	5.673057004	6.567887303	6.57362297	6.829422609	6.486369544	6.978809391	6.624946708	6.656081472	6.775639238	6.447323979	6.093276916	6.081068758	5.725189699	5.033561693	5.720432088
10606	8.262652173	8.212748171	8.215034312	8.127733	7.970500214	8.257445195	8.054653794	7.83114031	7.985517272	8.022037029	8.026828761	7.972373444	7.784858301	8.133531391	7.920591701	7.671778987	8.320919488	7.990483621	8.310340501	7.878302452	8.144607864	8.15999438	7.80442692	8.008296251	8.155573002	7.92328154	7.936808972	8.136416156	7.923983345	7.92984952	8.072062607	8.099996252	8.083838894	8.183910525	8.184202681	8.112937805	8.122063987	7.97033852	8.205455663	7.940058223	7.759820999	7.913462056	8.11621127	8.064625991	7.558801694	7.522947029	7.845110028	7.768930659	8.079216624
10607	5.10211817	5.03484143	5.023960143	5.462887057	5.128639411	5.194515031	5.161495409	5.143869777	5.046056991	5.076824916	4.977624371	5.107401419	5.094879185	5.039199101	4.977910396	5.308183549	5.314375532	5.082660177	5.079998148	5.115789407	5.167109895	5.38425738	5.09403333	5.267155862	5.491615281	4.932818454	5.278480033	5.227539938	5.207625998	5.303639199	5.329832264	5.044548702	4.694661602	5.404583403	5.104967017	5.226718974	5.193801456	5.305674263	5.10650474	5.33862387	5.562162638	5.41303924	5.330584336	5.197619715	5.478102951	5.453609833	5.326824451	7.115615079	6.555882782
10608	6.672287698	6.489473446	6.749196077	6.861294659	6.906484571	6.778792701	6.816007696	6.545278548	6.73244926	6.788934088	6.898886805	6.860612341	6.884538373	6.755612216	6.747222105	6.87235193	6.677007741	6.731035547	6.585610648	6.550677088	6.65956847	6.486207343	6.833961502	6.722058304	6.619416541	6.713343457	6.920568153	6.923434616	6.593204996	6.308565729	6.712565578	6.559919798	6.456074503	6.46049016	6.55587985	6.588989526	6.488360957	6.82690435	6.506292057	6.776868566	6.851397891	6.528555662	6.534398119	6.6629971	6.9203187	7.107183865	6.803627384	7.792446033	7.65216464
10609	5.035187432	4.831006788	4.980004504	4.89653187	5.222108049	5.00080843	5.201838951	4.845902707	5.128815136	4.753513595	5.037395779	5.140234407	4.958249669	5.039491074	4.987557881	4.79527526	4.860558096	5.00171436	5.058810405	4.992366817	5.097579016	4.965265086	5.133834705	5.075751172	5.147134846	5.005074177	4.92284859	4.994073258	5.058478972	5.002029493	5.275401133	5.176725884	4.82201707	4.880348414	4.824099544	4.970374423	4.891223283	5.008709811	4.606497349	4.81169328	4.968861954	4.886544758	4.997112943	4.970073387	4.965756175	4.726602324	5.206505926	5.643222437	5.656172546
10610	6.59680139	6.951762715	7.398103729	7.001771031	8.095860233	7.059325777	6.521511486	7.064848851	7.253868638	6.913629316	7.187985151	6.065924054	6.946971106	7.324084546	7.336664858	7.308033141	7.192770406	6.975215445	7.254113407	6.675022328	6.730889231	6.535076567	7.575141098	6.666246841	6.523520319	6.859094133	6.679570735	5.898955722	7.070348771	6.735967244	6.903909379	6.835302366	6.433159916	6.968460518	7.619838146	6.797996867	7.117174816	6.771141081	6.691955591	7.644280014	7.147264401	7.048205096	7.126236063	6.47538972	6.643973131	6.695354318	6.72839814	7.352128156	6.491078083
10611	5.297252574	5.472641949	5.612862432	5.459372634	5.523522276	5.485107986	5.797342989	5.572540481	5.766376275	5.557283999	5.821462321	5.464682087	5.625618056	5.672986088	5.512444362	5.424627948	5.662737565	5.588588119	5.775475269	5.897543461	6.000414027	5.952212465	5.506703148	5.412634995	5.50714946	5.936416881	5.732827213	5.558279216	5.889169544	5.864609987	5.374990937	5.75076403	5.623343535	5.526646625	5.531932175	5.581872767	5.502584563	5.421234447	5.703758837	5.523000098	5.939895705	5.514590602	5.490311521	5.623456536	5.411531628	5.3727138	5.368345571	6.447618467	6.58690293
10612	4.094427678	4.214520951	4.228302174	4.315467479	4.22006073	4.227215631	4.065176841	4.203146667	4.095613835	4.259298759	4.18733368	4.175209507	4.250590077	4.148624019	4.290565486	4.339476582	4.118227432	4.240339292	4.078951103	4.041545751	4.172724341	4.087828042	4.296970897	4.157743646	4.271003827	4.140555696	4.206873171	4.122301756	4.16066417	4.195430718	4.232188819	4.099023383	4.248770109	4.38215416	4.530551942	4.184184038	4.267914824	4.283831179	4.218354623	4.430706338	4.267695151	4.333101295	4.261547262	4.278652379	4.324942727	4.610295101	4.687142551	4.822349629	4.659412232
10613	7.255439092	7.388478537	7.082437469	7.131527513	7.063986289	7.147710097	6.680440483	7.12195316	7.252858967	7.31607593	7.133298016	7.350841635	7.098840731	7.270258799	7.031711938	7.186414319	7.250394115	6.953332847	7.479352064	7.161512466	7.09208567	7.47641713	6.831117606	7.41807095	7.27395516	7.530879797	7.20569246	7.09045251	7.102215607	7.506021995	7.381344524	7.302669215	7.180504406	7.192495005	6.821542527	7.268009211	7.056689282	6.846721877	7.459280957	6.681853805	6.751071315	7.257148857	7.308048489	7.180500666	6.568299811	6.558421884	6.811871848	8.039504739	7.539806271
10614	7.939356273	7.843265371	7.791501136	8.074033041	7.688665335	7.717403005	7.5879266	7.694309236	7.873995777	7.666814522	7.344643651	7.660458321	7.57613084	7.596408452	7.610526041	7.880173288	7.825339731	7.541912705	8.129434134	7.733312441	7.672961295	8.016235767	7.734612011	7.502163276	7.579331615	7.798316194	7.66415261	7.626755898	7.521892844	7.910717942	7.798923305	7.723169913	7.883796949	8.191640184	7.326521488	7.904593379	8.038772663	8.002162056	7.990800221	7.606574002	7.746178822	7.607417439	7.936638646	7.965703102	7.476591685	7.425916916	7.639491818	9.506477067	9.844399429
10615	8.035932937	8.030973478	8.043096559	7.543352995	7.767788132	8.065512021	6.339546314	8.181634649	7.033761388	7.58480536	7.651668848	7.516000159	7.511823738	7.496648099	7.191059691	7.885773012	7.587109842	6.41917344	8.039857745	6.794721505	7.036299944	7.191670844	7.472036509	7.91684871	7.605246861	6.668140362	7.973261286	7.395318645	6.956227209	7.958895657	7.904901003	7.605950959	7.77051754	7.89799108	7.250989339	8.102242149	7.899329115	7.637158572	7.752781915	8.004977869	7.270291014	7.828834494	7.781131791	7.797099604	7.801917782	7.810409295	7.893085414	5.78647728	6.142300658
10616	6.402146886	6.372255312	6.606071679	6.667405832	6.617209791	6.43414582	6.349299609	6.533743661	6.337392241	6.633457653	6.513374714	6.097870324	6.464372019	6.410333603	6.378169787	6.844307706	6.46135575	6.595738076	6.425833473	6.503953663	6.364853969	6.32769458	6.678282894	6.718396885	6.408322307	6.281643031	6.470297979	6.624571113	6.246548725	6.528746194	6.696658175	6.563874802	6.820914667	6.558309299	6.292753779	6.686238723	6.535848313	6.520124508	6.625921989	6.840510051	6.627009896	6.372823628	6.374625082	6.265656568	6.766323455	6.919835228	7.173762951	7.721934328	7.418690476
10617	7.804834456	7.931224981	7.617044549	7.52910716	7.548678363	7.714514671	7.628886608	7.56003437	7.51555022	7.815126095	7.568331846	7.819404561	7.392800186	7.606882687	7.594020555	7.807417721	7.656948717	7.67865784	8.005065842	7.606501777	7.595863674	7.857866431	7.997608758	7.449216119	7.555369855	7.321897464	7.381436447	7.088437128	7.488426937	7.607216752	7.637055156	7.665951658	7.344760028	7.588542495	7.453198567	7.591617166	7.454988971	7.251883923	7.594176782	7.566925688	7.591765699	7.539870708	7.757680029	7.573663464	6.745138131	6.983203707	7.173533528	8.653821208	8.949105497
10618	7.856434441	8.105540376	7.943793553	8.066147678	8.02123761	8.028521489	7.789527885	8.075202547	8.178372337	8.141616155	7.846237996	7.829651539	8.18972826	8.215002992	7.904245464	7.991872968	8.085376595	7.931286901	8.244162631	7.851078999	7.910353826	8.224588927	7.639813585	8.397814616	7.988478351	8.214410033	7.942284232	7.889549846	8.014183024	8.198985763	7.895405801	8.049215377	8.014486248	8.007634934	7.505228253	8.161547809	8.025576546	8.149992376	8.155518722	7.821493411	7.889071766	8.013461725	8.07059876	8.151241856	7.854777039	7.759108104	8.002208085	9.04992754	9.008199888
1062	4.11867074	3.938178814	4.049522098	4.481139136	4.154448094	4.115557772	4.04958962	4.243732917	4.057587819	4.030192471	4.080742968	3.866869431	4.186848486	4.136017258	4.363898652	4.014924077	4.01994817	4.200822749	3.893349026	4.146381502	4.189980543	3.93207974	4.049323715	4.158816832	4.028918557	4.335894448	4.05324656	4.104933042	4.191934505	4.081133036	4.123420201	4.003825218	4.066530826	4.129266979	4.270397198	4.011679002	3.903875635	4.024463486	4.061383156	4.001659433	4.088470614	4.238169429	4.416643397	4.23284599	4.205481034	4.217418581	4.27211689	5.095491326	5.257001125
10621	4.451264498	4.783749759	4.310807339	4.393225113	4.395047263	4.294670878	4.392233755	4.425186158	4.395998898	4.470765223	4.515909362	4.649574919	4.43303674	4.426350928	4.421111788	4.530213519	4.619247848	4.404048943	4.515869025	4.307100552	4.3121715	4.422853008	4.511708425	4.526064597	4.345139599	4.488251789	4.333425337	4.601219679	4.470939005	4.459560152	4.56390642	4.421496335	4.502919755	4.532607141	4.409777586	4.473317485	4.42860087	4.443937141	4.475987702	4.488144252	4.319620936	4.469922839	4.47060469	4.394645019	4.560298582	4.257471382	4.248819479	5.893796616	6.017689748
10622	3.853314578	3.987464236	3.983851698	4.335165552	4.245043106	3.659457624	3.921581772	3.984799888	3.687912936	3.967824952	4.076352788	3.90359541	3.832021217	3.851704527	4.094865472	3.947871083	3.948069113	3.97456843	3.832629783	3.837286825	3.746242714	3.874233241	3.985363832	3.896034811	3.966926538	3.853404315	3.918193928	3.948195587	3.835222618	3.919997484	3.862529552	3.855288004	3.879886764	3.909568061	3.84261944	3.949856579	3.77077843	3.878569534	3.814031322	4.247331271	3.853314578	3.983754865	3.815656165	3.954909169	4.159002221	4.240743325	4.428713202	4.283515438	4.216960484
10623	6.477451145	6.296861253	6.079119451	6.277163897	6.274295685	6.29740949	6.38290902	6.105498968	6.211189017	6.221359862	6.244640226	6.073323436	5.992494311	6.239669861	6.476220172	6.057063531	6.255337591	6.396307801	6.306051507	6.329469019	6.212599285	6.458385768	6.248119504	5.970940641	6.315488913	6.169535462	6.174235271	6.104417629	6.342438924	6.110273919	6.121653483	6.373210416	5.955861633	5.948887458	6.095677263	6.170660227	6.169663185	5.742893947	6.083194376	5.877821476	6.115876156	6.100404895	6.073370247	5.906976712	5.757502865	5.838920756	6.103783648	8.065621241	7.79733601
10625	8.959070586	8.349277799	8.382594502	8.477211238	8.411880467	8.506376187	8.63957983	8.276568236	8.751458836	8.707066084	8.503770087	8.678812847	8.720347939	8.353229057	8.229473305	8.391013506	8.69161741	8.276799228	8.774844583	8.665416094	8.763701545	8.719371673	8.823268004	9.148010711	8.969121322	8.875923002	8.489839776	9.197554594	8.295716816	8.635614279	9.105055434	8.894133178	8.800400984	8.700642509	8.175300281	8.970872192	8.757145797	9.090916364	8.680002469	7.92501821	8.046323538	8.935397703	8.687181277	8.873167666	8.649254873	8.186037622	8.321929595	8.827918066	8.72012369
10628	10.78510574	10.7499932	10.70180078	10.91170757	10.42678537	10.46418605	11.71073364	10.25219176	10.75088736	10.04384259	11.0754772	11.43438276	10.9585447	10.44285475	10.81260779	10.00469544	10.75667495	11.77920783	10.90918317	11.9141252	11.31989698	11.1261048	10.07811996	10.03475839	10.55787097	11.10521541	11.07939848	10.87418299	11.1236251	10.95732881	10.72661043	10.64446989	9.515855975	10.01373971	10.51051523	10.46373974	10.47375622	10.21553127	10.02671759	10.35699182	10.30059576	10.63916069	10.11092198	10.6263513	10.10979632	10.75220958	10.41063112	11.67517617	11.54765503
10629	4.244270405	4.349232874	4.583494655	4.410087448	4.362105713	4.347894859	4.139977191	4.425379514	4.2877928	4.284976593	4.337307597	4.413153956	4.434133409	4.403180019	4.539855483	4.559565772	4.356541619	4.346499877	4.317629196	4.239691624	4.276523018	4.43015918	4.390783283	4.515193398	4.310426271	4.354820799	4.446713211	4.541445083	4.526668134	4.304360857	4.449823868	4.360498454	4.657707805	4.559284	4.639390445	4.46587498	4.442909656	4.638067166	4.456030321	4.438377297	4.489955806	4.460872974	4.412275821	4.423377456	4.482479623	4.62650416	4.716274834	4.983777487	4.947340327
1063	3.968625639	3.975987265	4.13148542	4.08091066	4.239899959	4.090204028	4.199573978	4.026829744	4.221365595	4.111954234	4.202161363	4.071507655	4.15036181	4.302582738	4.193589775	4.051803527	4.073614794	4.087879852	4.074667576	4.026994883	4.333658296	3.954212844	4.014076127	4.088472142	4.136970089	4.254001253	4.309844799	4.152664757	4.063496876	4.084657321	4.055887983	4.192529159	3.991928783	4.112032798	4.173408795	4.16868067	4.0184469	4.128734863	3.952288765	4.225986796	4.120143593	4.018184558	4.066087261	4.065958835	4.160220174	4.288395683	4.219674125	4.978180191	5.13201153
10630	3.71077179	3.970443234	3.920467248	4.497268247	4.043447845	4.036257232	3.83651942	3.863601186	3.873638902	3.789547796	4.000338133	3.943919394	3.990696667	3.85146153	4.082041784	4.240411192	3.971016707	4.15363616	3.775852516	3.969093194	3.936161636	3.799615062	3.890307129	3.882827232	4.127142216	4.00171668	4.165429929	3.90834328	4.012281258	4.048124999	3.860405174	3.775299039	3.992315111	3.969504506	4.083393059	3.775212319	3.895863823	3.930759982	3.887523782	4.03232374	4.072092221	3.955766851	4.142595738	4.109976188	4.176563267	4.21787193	4.320259055	8.988906527	8.231443315
10631	5.060637344	7.409004679	5.530904168	5.675110274	7.436672051	5.771282453	8.496590978	5.420045026	8.644439135	4.809237268	6.859538943	4.829438833	8.182054937	8.13407084	6.549976779	5.152653381	8.146615558	6.042783923	7.167381907	4.764343402	6.233444442	7.505672421	7.141556041	5.940871179	5.228466071	8.428349236	8.874070436	5.133654092	7.890165355	5.85443051	4.829993988	7.245863486	4.957362643	4.949421393	4.813533647	4.959653535	5.055964975	4.703997265	4.863118254	5.546289044	5.341216126	5.070656447	4.541792612	5.164560532	5.315182562	4.858437967	4.707120577	11.65313334	12.13520714
10632	11.13471077	11.20123274	11.23244395	11.03645659	11.23463896	11.02798284	11.04040873	10.92203107	10.9695345	11.04982141	10.97400923	10.98289881	10.80544199	11.204087	11.12843918	11.15777966	11.16587264	10.9098046	11.14653677	10.9775468	11.12698251	11.15881207	11.04779603	10.96824993	10.85042959	11.00855958	11.19820655	11.19796159	11.11746905	11.03030882	11.08283262	11.0603128	11.04339722	11.19385904	10.97977858	11.2696709	11.20152184	11.27642761	11.09229455	11.05283355	11.05065402	11.19980583	11.07066952	11.15878953	11.02365032	11.07283399	11.09826882	10.13618944	10.28582849
10633	5.319695649	5.304123507	5.327454984	4.994325175	5.574700741	5.100970999	5.146634678	5.410284538	5.157895237	5.233272835	5.407338316	4.995860594	5.514356	5.176785061	5.361217537	5.637805468	5.242916412	4.946025547	5.037709733	4.977227449	5.119444563	5.081585018	5.479079154	5.355334225	5.425851859	5.365655033	5.290556457	5.632192162	5.276475114	5.421196149	5.515836833	4.870290042	5.193564293	5.473061152	6.0441162	5.235059057	5.218771558	5.327299307	5.389253249	5.29961042	5.168158281	5.350534316	5.487072424	5.385518689	5.6295445	5.490342813	6.176296393	6.510313798	5.832870323
10634	5.782322488	5.710760756	5.992878266	5.893748454	5.758424939	5.896628332	5.835435095	5.963887803	6.057806076	5.822077925	6.172394634	5.772503032	6.04245108	5.922868575	5.880355901	5.904177509	5.8948128	5.916102996	5.825817903	5.82869848	5.942966979	6.161656539	6.396226935	5.937005708	6.095276029	6.078597985	5.924335161	6.219420542	6.131022075	5.995626887	5.921517251	5.99776163	6.03354897	5.98413315	5.990531969	6.137806134	6.295282656	6.159239083	6.048799986	5.995648575	6.427489427	5.999218815	6.03489896	6.140210554	6.062177347	6.052676776	6.16833722	7.668568782	7.351778407
10635	3.596524698	3.435558636	3.37426342	3.659507729	3.646399718	3.511729857	3.649607258	3.604741774	3.574061065	3.719155442	3.571548387	3.606241197	3.59578383	3.604676213	3.639333134	3.387581244	3.677517655	3.780230211	3.49548953	3.643319002	3.728190407	3.484162419	3.527582996	3.619556129	3.554895882	3.695224261	3.505670585	3.463173323	3.540974754	3.511602953	3.454296379	3.729540437	3.453292131	3.446726643	3.585764012	3.389050843	3.398926709	3.417902147	3.343589501	3.539058682	3.73734704	3.570206832	3.545621254	3.614393363	3.789214101	3.575278274	3.432120398	4.521904713	4.254835544
10636	5.350570155	5.015254723	5.153798596	5.231133998	5.378785136	5.057900857	5.110023099	5.246353011	5.123390774	5.365897126	5.444497855	5.134268434	5.046921432	5.320614365	5.456262672	5.062759832	5.291202186	5.140286472	4.848548795	5.080136514	5.212905965	5.112837945	5.44557466	5.199153339	5.169388209	5.209681328	5.15859674	5.219748302	5.245458328	5.26134823	5.366729778	5.221777878	5.299105728	5.360749328	5.79982633	5.268419214	5.116695944	5.381958005	5.12051193	5.429872836	5.618279217	5.115459255	5.146848261	5.16797423	5.447528974	5.579529359	5.278167002	4.942602743	4.993165433
10637	4.637530832	4.692431287	4.929387759	5.440804281	4.632241444	4.723410357	4.483485022	4.778151482	6.598333979	4.664923047	4.915243789	6.747039304	4.709421533	5.261113554	4.668330626	4.991175498	4.891815317	5.821886952	4.737168756	4.80551237	4.607841174	4.93703103	4.794503418	4.92049177	4.884814582	6.577541436	6.630969895	4.756082648	4.778746596	4.883053932	4.750670589	4.701674489	4.951165256	5.069761662	5.792663285	4.767741459	4.854934144	4.961924949	4.903245485	4.540836328	5.533037674	6.466085662	7.588386402	6.178138053	6.146133005	6.911247522	6.766495982	5.635301847	5.576170607
10638	5.816849213	5.770072353	5.133210358	5.3404256	5.16564711	5.343035073	5.559067735	5.306694295	5.527371626	5.320307626	5.466412716	5.699986623	5.03328561	5.679705926	5.414404489	5.22692548	5.547908733	5.231327341	6.037026332	5.445888263	5.446223913	5.801390473	6.093813528	5.31840688	5.254532436	5.90516229	5.035395855	5.467701964	5.712951281	5.346971805	5.411850225	5.684512542	5.296149893	5.316997611	4.928053866	5.850166309	5.530057169	5.529260194	6.062411857	5.031680202	5.005210642	5.484722443	5.542151638	5.731820577	5.148875959	4.884021374	4.932257505	6.958706089	6.851914892
10639	4.585929656	4.723624052	4.842607185	4.831932905	4.904274364	4.790628868	4.678176912	5.029163802	4.734419261	4.904041337	4.790863796	4.64404407	4.856089283	4.665850193	4.748711607	5.188460754	4.575014546	4.85713761	4.574180067	4.554564808	4.679701382	4.533897054	4.894250992	4.846164325	5.227460276	4.521688679	4.777873001	4.953701438	4.585576652	4.761713208	4.746907343	4.525457799	4.927267059	4.679601265	5.211758779	4.802190565	4.731625388	5.001374189	4.752884171	5.035174092	4.835674388	4.803308381	4.881390617	4.915829895	5.191625141	4.650657027	4.989449244	5.507346048	5.228735199
10640	6.384302439	6.319929243	5.715206875	5.758804592	5.768851121	5.76466454	5.696608328	5.78470458	5.739616857	6.045659093	5.790316784	5.859401362	5.308293196	5.977269829	5.674356781	5.37796335	6.471578851	6.135801343	6.368507298	5.795424105	6.237019151	6.645421508	5.703910186	5.873359971	6.474058441	6.374499952	5.516716646	6.050655365	5.947547423	6.01960016	6.575721087	6.635630241	6.300361515	6.024393934	6.225067099	6.402264329	5.927604988	5.579161586	6.798122635	5.493209294	6.089029671	6.184927395	6.004967683	6.176194308	5.724276673	5.612155213	5.798894882	4.768245229	4.996398636
10641	7.744855568	7.751570664	7.598822334	7.695871921	7.932410899	7.806675041	7.564024991	7.487050624	7.635900338	7.591701583	7.501279312	7.687635862	7.40086251	7.748743839	7.666219182	7.587949298	7.665182392	7.309570766	7.719413742	7.562138991	7.671989453	7.671930499	7.760781831	7.555085983	7.417645472	7.362189133	7.255147681	7.244546731	7.528692898	7.624194475	7.692103589	7.659916535	7.476767199	7.575035283	7.513666469	7.808802692	7.792900665	7.633390748	7.66890052	7.568571521	7.439993431	7.607044255	7.647315747	7.516381752	7.381087442	7.340964334	7.235093875	8.619449541	8.328950096
10643	3.592605789	3.55155388	3.463123422	3.528207529	3.561032565	3.407200227	3.604533788	3.601937556	3.474272096	3.652340416	3.507521911	3.409318297	3.44512162	3.642236275	3.433321261	3.809476735	3.373579266	3.608656616	3.460824802	3.544016682	3.611597794	3.526676633	3.534004189	3.554844994	3.492018494	3.461652537	3.487754198	3.566269501	3.547852133	3.520478351	3.597985654	3.569017451	3.583466909	3.614586488	3.640860254	3.646738982	3.626638106	3.70380125	3.476050258	3.732916987	3.480714601	3.664928034	3.65144329	3.535271716	3.711101564	3.704128737	3.605665096	4.048395747	3.968149222
10645	6.087230716	6.201418584	6.292163938	6.144012089	6.107273816	6.165724306	6.227966931	6.2386501	6.05358127	6.028502214	6.233833412	5.971847195	5.992901626	6.190443577	6.139601339	6.27225995	6.044554214	6.302684229	6.020977481	6.0924553	6.308793957	6.164711251	6.248182487	6.097274475	6.230374124	6.205832424	6.142689254	6.135141857	6.11075082	6.119270943	6.135856811	5.982253847	6.059249776	6.237176436	6.202579222	5.973127655	6.030878937	6.107530112	6.186216323	6.236236671	6.173615034	6.40753176	6.14821623	6.052647208	6.26784358	6.437507949	6.129598673	7.414900428	7.148880728
10647	6.720471111	5.125594275	4.963337098	5.063192981	4.075285651	5.233795041	4.291003037	6.683736168	4.511355582	6.811827935	5.491643124	7.237129916	5.531121659	4.580671416	5.243860932	5.210396912	4.77489465	4.917918784	5.281383397	4.156385244	4.774337504	4.723034107	4.813200618	6.171211797	4.818356855	4.559293203	6.347960862	6.725057179	5.014982943	5.90487104	6.355414764	6.278053418	4.741140382	5.033085399	4.782320962	4.990627334	4.889583126	4.886792025	4.741015114	5.175973029	5.470577087	4.821282337	5.233331529	4.754959243	4.85813521	4.628575004	5.144919468	4.719109159	4.756627605
10648	3.712447118	3.697657225	3.709194527	3.8327804	3.906499314	3.817117548	3.603790596	3.697936417	3.744322504	3.733809446	3.738787393	3.725113377	3.618415194	3.694578889	3.756280514	3.791751052	3.523170017	3.718287937	3.626634155	3.64242957	3.663380347	3.63561114	3.645004798	3.689979951	3.828559921	3.68166213	3.714440723	3.616972958	3.687921413	3.71481274	3.70336311	3.541262443	3.786626023	3.753732985	3.816750548	3.646951811	3.66323755	3.589778378	3.757898237	3.950568776	3.840357719	3.641275609	3.684675092	3.682981313	3.790124819	4.052770331	3.803676787	4.353449801	4.18928375
10650	4.584563886	4.725309046	4.522002081	4.579269358	4.723086336	4.489019603	4.305430852	4.523769228	4.493278623	4.519973364	4.623739597	4.559767602	4.764580037	4.671873923	4.45751562	4.836701171	4.504335806	4.708099275	4.446128659	4.645375379	4.63713011	4.326965436	4.528623018	4.781492342	4.788113807	4.693953213	4.555199133	4.590396903	4.39861966	4.611427313	4.632696333	4.394306019	4.452169455	4.734217176	4.566474218	4.634002355	4.540045451	4.495408572	4.491363016	4.801141047	4.571109823	4.613750842	4.841151587	4.668872942	4.597854082	4.573020983	4.413858567	6.083343663	6.105673002
10651	8.270920446	8.460955772	8.386180443	8.277779319	8.52042877	8.316242779	8.36021258	8.135332018	8.457128105	8.123024784	8.411468913	8.224367612	8.246959469	8.59781287	8.278801161	8.254172639	8.250138895	7.977272975	8.436302094	7.957538399	8.334527713	8.394012202	8.352242233	8.335022503	8.127936129	8.275316147	8.539390098	7.98003013	8.253074819	8.207965924	8.235238493	8.426747709	8.15541574	8.259511153	7.931716621	8.371247958	8.332484285	8.19736849	8.302101173	8.286053888	8.321591862	8.132949257	8.054620923	8.119157827	7.75825369	7.683483439	7.688385008	9.628607572	9.283771457
10652	6.583862669	6.735766137	6.651733982	6.452276512	6.657464769	6.524183051	6.621422994	6.297092535	6.380960634	6.692865171	6.62248326	6.602891623	6.348328328	6.759484989	6.562385583	6.650917817	6.596796428	6.766635355	6.464082026	6.571740755	6.567238606	6.594891282	6.414909154	6.452388514	6.132977246	6.456765864	6.728069609	6.438966281	6.459908465	6.516490105	6.711531069	6.7388823	6.598250494	6.486221104	6.672007039	6.551396193	6.76666452	6.557967865	6.682696757	6.813184079	7.016888488	6.57236227	6.531072658	6.602630861	6.123674824	6.283531485	6.402373574	8.258229509	8.185978422
10653	9.885120541	9.376220044	9.438218191	9.390737175	9.717956589	9.418897164	10.10436037	9.69175928	9.869536937	9.564916497	9.612452099	9.950204007	9.776273545	9.667604436	9.662779578	9.479864711	9.587300722	9.732943239	9.806464328	9.875748283	10.19031263	9.967073453	9.450807323	9.543852551	9.665169452	9.529579409	9.842451129	9.984951541	9.760853735	9.718867227	9.6753956	10.14252087	9.31112731	9.035856977	9.421560146	9.617600611	9.53307058	9.514994134	9.671720559	9.640089244	10.05916455	9.469354621	9.429943548	9.462430834	9.121150003	9.060207258	9.119057176	11.60229667	11.4921429
10654	8.348549175	8.126330632	8.520102595	8.092644979	8.315034421	8.157206474	7.826726764	8.087473656	8.06588553	8.216506096	7.900046887	8.420093856	7.817299769	8.212741933	7.816762812	8.070613419	8.059759418	7.823460182	8.075205421	7.815630258	7.853301417	7.869973385	8.136975903	8.056892093	7.934294054	7.888121016	8.334095827	8.215036757	7.773414664	7.778648441	8.390108145	8.021975678	8.079579123	8.219267039	7.360609429	8.272866872	8.172516689	8.057137318	8.164958508	8.241730701	8.022702716	8.263229532	8.043625249	7.982401192	8.18128556	8.09820931	7.957226653	9.045644107	8.730913029
10656	6.805399714	5.627097831	6.167326574	5.835350737	5.927838736	5.759632977	5.756969999	6.340630492	5.768167664	6.170595085	5.917321634	6.402310629	5.995294952	5.913911982	5.959958647	5.751457921	5.794749283	5.368727286	5.580777383	5.715606472	5.662346475	5.802651302	6.145686591	6.193858212	6.171876574	5.956845614	6.017913993	6.603084354	5.701138204	5.884469884	6.595712523	6.381853766	5.664593651	6.024089418	5.940111767	5.743128882	5.576821931	5.709000596	5.930993207	5.862271901	6.138011977	5.85173038	5.84254825	5.551457124	5.922174617	5.835775561	6.14403048	7.565130833	7.006034448
10657	9.039781209	8.834282686	8.679910679	8.829754408	8.840196451	8.798737915	9.146576593	8.867094128	9.054841691	8.778380026	8.668621903	8.944949785	8.924320474	9.052744342	9.02135444	8.508783339	9.046734786	8.958865561	8.876688616	9.040544321	9.061886336	9.113673914	8.806679248	8.87035203	8.902486075	8.837386031	8.827476565	9.029729512	8.954610871	8.747673235	8.769402506	9.04426187	8.839785967	8.816463056	8.72548492	8.894664869	8.93420248	8.6383271	8.83254409	8.459985445	8.874135626	8.813188035	8.761123406	8.811862105	8.423227692	8.233655818	8.554765299	10.12091407	10.30771499
10658	5.707093258	5.348706666	5.406178781	5.307807517	5.163344317	5.57021085	5.449598021	5.703265576	5.536664888	5.401416509	5.303654425	5.424690388	5.189634588	5.368366368	5.393753513	4.980107944	5.944904026	5.378750872	5.936315309	5.531263022	6.029656164	6.309929346	5.02806479	5.62050926	5.665378851	5.654351068	5.254726498	5.856754052	5.735553088	5.598124886	5.84950074	5.944556786	5.542139678	5.527451964	5.499314916	5.687217728	5.650204613	5.368743671	5.577672934	5.399992242	5.550823858	5.849678227	5.719019293	5.628933626	5.814962019	5.329171324	5.705198451	6.258256976	6.335251981
10659	4.624842649	4.791154539	4.710730248	4.790779418	4.780286945	4.789977645	5.333273941	4.642723198	5.154008385	4.770419486	4.705433965	4.668772137	4.915738556	4.554467526	4.665073019	4.528799685	4.837834969	5.295892191	4.75100458	5.276762174	5.11084611	4.659234739	4.472380679	4.62170589	4.715338654	5.092172895	4.817567342	4.801404257	4.91973104	4.60563461	4.549777746	4.700259137	4.566506192	4.615199575	4.579032647	4.591334381	4.50824658	4.563858702	4.460995631	4.651863674	4.761374127	4.827090908	4.543892827	4.977688539	4.808343415	4.875157916	4.682555165	5.613759786	6.084218967
10660	3.898191776	4.049057142	4.128419608	4.035492506	3.925321045	4.009445324	3.961731057	3.905893215	4.066827449	3.811930647	4.121492879	3.959596159	4.081764902	3.965603083	4.074881294	4.343587538	3.932213051	3.921597515	3.934805948	3.909652827	3.965675643	3.830777022	4.029608648	3.982880799	4.055525095	3.909435705	3.876939373	4.087721413	3.928045441	3.981740625	4.076207174	3.930814422	3.96308151	4.072301751	4.245658837	3.860012541	3.970691602	4.13615322	3.934896028	4.310281973	4.003210963	3.999096483	4.201634802	3.992369121	4.327768985	4.546939005	4.416690277	4.674809946	4.543108531
10661	4.496856982	4.819818187	4.709595729	4.695691729	4.869545411	4.647830289	4.505513887	4.663826325	4.371533138	4.742238603	4.48546331	4.426672491	4.559984091	4.448278078	4.675740685	5.130215311	4.73007352	4.646589426	4.534146819	4.546468076	4.669952391	4.374316206	4.789851854	4.610167043	4.779143193	4.733975382	4.735704965	4.616886568	4.474934933	4.566827054	4.520314375	4.594722011	4.582405658	4.75433983	4.907668589	4.727816477	4.647252603	4.889475978	4.63329524	4.859992162	4.563449114	4.528971249	4.681221795	4.564088256	4.752693607	4.890671501	4.701917568	5.385042582	5.189335057
10663	4.267170963	4.11398602	4.427056883	4.391742058	4.310214499	4.266295885	4.366366538	4.244932378	4.494094931	4.497873859	4.325193373	4.229913918	4.44708668	4.328427134	4.424327081	4.488751797	4.451416778	4.443545034	4.266924368	4.399195413	4.548289536	4.244820322	4.257614568	4.33413645	4.443707365	4.374727477	4.48494311	4.440396336	4.362166947	4.39994556	4.29347118	4.16929955	4.46597358	4.426197145	4.452800993	4.231130448	4.336500299	4.573220668	4.241834921	4.601783271	4.37239356	4.416412585	4.43162218	4.513831308	4.5810021	4.559014637	4.423535712	4.647565953	4.636463191
10664	7.457898975	7.145794113	7.169290072	7.01408355	7.227029213	7.237257056	7.506372201	7.080891487	7.250449762	7.159002397	7.098519115	7.217455565	7.21820399	7.243409453	7.277141142	7.065241681	7.271103422	7.402323584	7.511806461	7.807443354	7.559701708	7.52957889	7.22518738	7.195567829	7.192148988	7.101612088	7.220942473	7.301515157	7.42560613	7.357696212	7.223962941	7.49621299	6.844546487	7.143783933	6.672007039	7.234536199	7.063210631	7.114106729	7.317176224	7.001403261	7.259742454	7.224150278	7.081839782	7.043885688	6.522749349	6.263809813	6.825615734	8.480699798	8.323728458
10665	3.679268528	3.873490897	3.76822793	3.752834821	3.684961583	3.824946522	3.659684048	3.755931657	3.787929999	3.675291477	3.702983008	3.738926157	3.877098996	3.798879635	3.577722531	4.231366707	3.68834003	3.774554398	3.78644164	3.761136256	3.655669216	3.720011755	3.900008861	3.862962913	3.800156968	3.75955132	3.731598662	3.68224477	3.613323432	3.754850856	3.769015176	3.608306082	3.810337256	3.869267645	3.92949894	3.826634476	3.64300224	3.844190461	3.852309595	3.787188827	3.752756317	3.916125057	4.049471138	3.848218789	3.987241911	4.20111007	3.965393341	4.088113113	4.326624161
10666	3.795129839	3.77329172	3.938654703	4.012876676	4.046301442	3.829311456	3.863192891	3.824115136	3.816855943	3.872543861	3.865479876	3.857544796	3.914562927	3.740572676	3.803992157	4.021117745	3.603507579	4.070321398	3.734028147	3.756957905	3.867361663	3.69917095	3.892684295	3.791130552	3.826416707	3.736717493	4.009779972	3.821528125	3.73433561	3.966585024	3.813923888	3.579297644	3.898396915	3.835887027	4.048595271	3.758121019	3.991417519	3.883076817	3.808214532	3.975918759	3.883076817	3.847607575	3.873557205	3.926792774	4.061365673	4.269352769	3.958759477	4.498245685	4.452195035
10667	7.119418865	7.134200427	7.091202268	7.21307613	7.139859969	7.018718994	6.852228786	7.058951411	7.071219658	6.97112642	7.263922707	7.140082656	6.368047218	7.020515905	7.041903654	7.148491618	7.084486835	6.841217741	7.036632323	7.015898933	6.920214324	6.994416405	7.123906191	7.046478676	7.048135642	6.843542833	6.996798486	6.838279454	6.799122854	6.855080978	6.944862968	7.049021088	6.967018942	7.171259722	6.758734985	7.094325417	7.069837614	7.095092265	6.909674074	7.012677257	7.100344773	6.8972548	7.023068651	7.035230079	6.953989152	7.085374241	6.936148917	8.190762873	7.737411065
10668	6.897199382	6.592227785	6.684703022	6.684359509	6.676996067	6.728624717	6.65318971	6.818838937	6.364045306	6.843853876	6.811638617	6.795083514	6.565288281	6.801279063	6.785450294	6.491314366	6.762510303	6.180738592	6.784138754	6.801950919	6.482475448	6.693829491	7.272259549	6.846383678	6.590359528	6.481154701	6.739709068	6.59826997	6.630230709	6.548513804	6.901480393	6.424164582	6.745656465	6.586982393	6.598141361	6.890428849	6.895885177	6.762219683	7.000987153	6.945034147	6.983401467	6.675678433	6.435486633	6.638105735	6.464505778	6.462236067	6.490655087	8.784570243	8.311005965
10669	4.480511385	4.256200018	4.600033154	4.469369598	4.554469972	4.354459931	4.272562072	4.431203403	4.116779783	4.515165521	4.362284206	4.067195993	4.591815859	4.458681628	4.423081085	4.369021639	4.173718399	4.389180863	4.232024333	4.094422179	4.166958213	4.315241337	4.335596133	4.588438856	4.377666225	4.297380456	4.493177019	4.208762204	4.23502123	4.236685196	4.65537339	4.248896797	4.209865046	4.549860154	4.603090785	4.310238494	4.499897946	4.446893459	4.541891815	4.320421964	4.598033572	4.262474282	4.627753167	4.43184556	4.701393392	4.437176838	4.747870233	4.638775943	4.605366873
10670	9.293571259	9.340701895	9.454125515	9.463315948	9.460100268	9.361475973	9.643952321	9.204234035	9.567408369	9.388948546	9.389345865	9.427850284	9.413669259	9.473226312	9.378619723	9.395836485	9.540011027	9.540262467	9.623855258	9.382116949	9.36622673	9.43682572	9.647014174	9.337786949	9.041241584	9.370565813	9.085450873	9.143937969	9.383218953	9.301857547	9.168567113	9.4624286	9.483078927	9.394808554	8.89283133	9.528319618	9.4921544	9.368548884	9.516861625	9.418269101	9.389576838	9.372119041	9.383167434	9.382379558	9.122803365	8.898245273	9.076309596	11.46439697	11.27626303
10671	9.039842803	8.788910915	8.893914229	8.799025514	8.938971714	8.687650143	8.724630177	8.649849267	9.024442723	8.563480809	8.967385439	8.924928143	8.645722343	8.965639789	8.715962539	8.400374414	8.843515917	8.903756732	9.089636681	9.040266989	8.821520818	9.129761939	9.157688501	8.841123184	8.780355121	9.068720115	8.990034065	8.762668749	8.879841887	8.589245077	8.819631994	8.88430284	8.938558406	8.846668768	8.826552349	9.204320525	8.892177497	8.499121936	9.067925372	8.629411678	9.031374801	9.041916019	8.891302575	8.913575309	8.654904762	8.117070338	8.402069175	10.13434153	9.860863116
10672	5.144971358	4.567555084	4.81400762	4.368980044	4.598079928	4.778029699	4.78615098	4.762789064	4.773146084	4.711170567	4.884374649	4.9036863	4.861690034	4.630950934	4.577789632	5.001504561	5.562668355	4.929831034	5.579389133	5.444808946	5.097028753	5.875276586	4.499114635	4.684112495	4.999022273	5.435214701	4.75973971	5.063088822	5.421498823	5.123896672	5.468263347	5.537526366	5.75103293	5.434077947	5.765902274	5.53102474	5.203114465	5.235623959	5.448450014	4.995778408	5.298098581	5.457108039	5.524704782	5.243942902	5.255755289	4.880838027	4.868314118	5.009986153	5.165327466
10675	4.067793989	3.994683064	3.96214364	4.155952538	3.930913645	4.099410399	3.871805104	4.076652746	4.141439953	4.059627224	3.940119418	3.963039396	4.02212395	4.067897109	4.123891277	4.081019625	4.006331112	3.980213544	4.001172164	3.801989922	3.914403338	4.021977868	4.011619459	4.083901371	4.050981182	3.922343398	3.962912127	3.96844812	4.035334589	4.113794155	4.06676942	3.892062974	4.04270021	4.221220286	4.195036008	4.128986093	3.988342285	4.040037304	4.030358714	4.113529383	4.088989071	4.148315236	4.055813893	4.103389808	4.306147698	4.303261666	4.123444489	4.754385662	4.887988588
10677	4.279085917	4.324093308	4.411210279	4.570804341	4.507873177	4.269515824	4.252490053	4.421414923	4.231161201	4.232242866	4.218072073	4.472738838	4.403422957	4.394477238	4.293703686	4.583019885	4.242431977	4.178424163	4.131722483	4.308587123	4.202508891	4.157923061	4.48893515	4.380532615	4.347145789	4.264423403	4.30625764	4.246697362	4.424184781	4.281370481	4.510689069	4.136382791	4.407296541	4.393881286	4.326369799	4.06328675	4.354847309	4.389620122	4.156493791	4.270409612	4.215244671	4.485972825	4.328641418	4.50856389	4.432077928	4.706544779	4.612545377	4.83427653	4.703776923
[truncated: 11,454 more rows]
[truncated: 44 more columns]
