# Supplementary material for: Potential Small Molecules for Therapy of Lupus Nephritis Based on Genetic Effect and Immune Infiltration
Source: Biomed Res Int. 2022 Apr 23;2022:2259164. doi: 10.1155/2022/2259164 (PMC9056222; doi:10.1155/2022/2259164)
Supplement: Supplementary Materials — Supplementary Table1: the expression data of GSE32591, which contains 32 glomeruli and tubulointerstitum tissues of LN patients and 14 glomeruli tissues and 15 tubulointerstitum tissues of healthy controls. Supplementary Table2: the expression data of GSE112943 consists of formalin fixed paraffin-embedded kidneys (14 lupus nephritis and 7 control kidney). Supplementary Table3: the data of the relationships between Nine chemicals, 23 hub genes and lupus nephritis. Supplementary Table4: the degree of 23 hub genes in the network between small molecules and genes and the description and function of 23 hub genes. Supplementary Table5: all the data of small molecules based on the 23 hub genes from the DSigDB database. Supplementary Table6: the relationship of nine potential small molecules and 7 common effective drugs for LN were found in the DREIMT database. [file 2259164.f1.zip › Supplementary Table2.txt]

!Series_title	Genome-wide analysis of gene expression of cutaneous lupus skin samples and lupus nephritis kidney samples
!Series_geo_accession	GSE112943
!Series_status	Public on Apr 22 2021
!Series_submission_date	Apr 10 2018
!Series_last_update_date	Sep 20 2021
!Series_pubmed_id	34153327
!Series_summary	Microarray gene expression analyses were performed on human skin samples from cutaneous lupus subtypes (SCLE and CCLE) and normal patients along with human kidney samples from lupus nephritis and normal patients
!Series_overall_design	47 deidentified human samples from formalin fixed, paraffin-embedded skin (6 chronic cutaneous lupus, 10 subacute cutaneous lupus, 10 control skin) and formalin fixed paraffin-embedded kidney (14 lupus nephritis, 7 control kidney)
!Series_type	Expression profiling by array
!Series_contributor	Wei-Che,C,Ko
!Series_contributor	John,E,Harris
!Series_sample_id	GSM3091745 GSM3091746 GSM3091747 GSM3091748 GSM3091749 GSM3091750 GSM3091751 GSM3091752 GSM3091753 GSM3091754 GSM3091755 GSM3091756 GSM3091757 GSM3091758 GSM3091759 GSM3091760 GSM3091765 GSM3091766 GSM3091767 GSM3091768 GSM3091769 GSM3091770 GSM3091771 GSM3091772 GSM3091773 GSM3091774 GSM3091775 GSM3091776 GSM3091777 GSM3091778 GSM3091779 GSM3091780 GSM3091781 GSM3091782 GSM3091783 GSM3091784 GSM…
!Series_contact_name	John,E,Harris
!Series_contact_laboratory	Harris Lab
!Series_contact_department	Dermatology
!Series_contact_institute	University of Massachusetts Medical School
!Series_contact_address	364 Plantation St
!Series_contact_city	Worcester
!Series_contact_state	MA
!Series_contact_zip/postal_code	1605
!Series_contact_country	USA
!Series_supplementary_file	ftp://ftp.ncbi.nlm.nih.gov/geo/series/GSE112nnn/GSE112943/suppl/GSE112943_RAW.tar
!Series_supplementary_file	ftp://ftp.ncbi.nlm.nih.gov/geo/series/GSE112nnn/GSE112943/suppl/GSE112943_non-normalized.txt.gz
!Series_platform_id	GPL10558
!Series_platform_taxid	9606
!Series_sample_taxid	9606
!Series_relation	BioProject: https://www.ncbi.nlm.nih.gov/bioproject/PRJNA449670
!Sample_title	KidneyControl 1	KidneyControl 2	KidneyControl 3	KidneyControl 4	KidneyControl 5	KidneyControl 6	KidneyControl 7	Lupus nephritis 1	Lupus nephritis 2	Lupus nephritis 3	Lupus nephritis 4	Lupus nephritis 5	Lupus nephritis 6	Lupus nephritis 7	Lupus nephritis 8	Lupus nephritis 9	Lupus nephritis 10	Lupus nephritis 11	Lupus nephritis 12	Lupus nephritis 13	Lupus nephritis 14
!Sample_geo_accession	GSM3091775	GSM3091776	GSM3091777	GSM3091778	GSM3091779	GSM3091780	GSM3091781	GSM3091782	GSM3091783	GSM3091784	GSM3091785	GSM3091786	GSM3091787	GSM3091788	GSM3091789	GSM3091790	GSM3091791	GSM3091792	GSM3091793	GSM3091794	GSM3091795
!Sample_status	Public on Apr 22 2021	Public on Apr 22 2021	Public on Apr 22 2021	Public on Apr 22 2021	Public on Apr 22 2021	Public on Apr 22 2021	Public on Apr 22 2021	Public on Apr 22 2021	Public on Apr 22 2021	Public on Apr 22 2021	Public on Apr 22 2021	Public on Apr 22 2021	Public on Apr 22 2021	Public on Apr 22 2021	Public on Apr 22 2021	Public on Apr 22 2021	Public on Apr 22 2021	Public on Apr 22 2021	Public on Apr 22 2021	Public on Apr 22 2021	Public on Apr 22 2021
!Sample_submission_date	Apr 10 2018	Apr 10 2018	Apr 10 2018	Apr 10 2018	Apr 10 2018	Apr 10 2018	Apr 10 2018	Apr 10 2018	Apr 10 2018	Apr 10 2018	Apr 10 2018	Apr 10 2018	Apr 10 2018	Apr 10 2018	Apr 10 2018	Apr 10 2018	Apr 10 2018	Apr 10 2018	Apr 10 2018	Apr 10 2018	Apr 10 2018
!Sample_last_update_date	Apr 23 2021	Apr 23 2021	Apr 23 2021	Apr 23 2021	Apr 23 2021	Apr 23 2021	Apr 23 2021	Apr 23 2021	Apr 23 2021	Apr 23 2021	Apr 23 2021	Apr 23 2021	Apr 23 2021	Apr 23 2021	Apr 23 2021	Apr 23 2021	Apr 23 2021	Apr 23 2021	Apr 23 2021	Apr 23 2021	Apr 23 2021
!Sample_type	RNA	RNA	RNA	RNA	RNA	RNA	RNA	RNA	RNA	RNA	RNA	RNA	RNA	RNA	RNA	RNA	RNA	RNA	RNA	RNA	RNA
!Sample_channel_count	1	1	1	1	1	1	1	1	1	1	1	1	1	1	1	1	1	1	1	1	1
!Sample_source_name_ch1	human kidney	human kidney	human kidney	human kidney	human kidney	human kidney	human kidney	human kidney	human kidney	human kidney	human kidney	human kidney	human kidney	human kidney	human kidney	human kidney	human kidney	human kidney	human kidney	human kidney	human kidney
!Sample_organism_ch1	Homo sapiens	Homo sapiens	Homo sapiens	Homo sapiens	Homo sapiens	Homo sapiens	Homo sapiens	Homo sapiens	Homo sapiens	Homo sapiens	Homo sapiens	Homo sapiens	Homo sapiens	Homo sapiens	Homo sapiens	Homo sapiens	Homo sapiens	Homo sapiens	Homo sapiens	Homo sapiens	Homo sapiens
!Sample_characteristics_ch1	tissue: Kidney Control	tissue: Kidney Control	tissue: Kidney Control	tissue: Kidney Control	tissue: Kidney Control	tissue: Kidney Control	tissue: Kidney Control	tissue: Lupus Nephritis	tissue: Lupus Nephritis	tissue: Lupus Nephritis	tissue: Lupus Nephritis	tissue: Lupus Nephritis	tissue: Lupus Nephritis	tissue: Lupus Nephritis	tissue: Lupus Nephritis	tissue: Lupus Nephritis	tissue: Lupus Nephritis	tissue: Lupus Nephritis	tissue: Lupus Nephritis	tissue: Lupus Nephritis	tissue: Lupus Nephritis
!Sample_molecule_ch1	total RNA	total RNA	total RNA	total RNA	total RNA	total RNA	total RNA	total RNA	total RNA	total RNA	total RNA	total RNA	total RNA	total RNA	total RNA	total RNA	total RNA	total RNA	total RNA	total RNA	total RNA
!Sample_extract_protocol_ch1	RNA was extracted using Roche high pure RNA paraffin kit according to the manufacturer’s instructions	RNA was extracted using Roche high pure RNA paraffin kit according to the manufacturer’s instructions	RNA was extracted using Roche high pure RNA paraffin kit according to the manufacturer’s instructions	RNA was extracted using Roche high pure RNA paraffin kit according to the manufacturer’s instructions	RNA was extracted using Roche high pure RNA paraffin kit according to the manufacturer’s instructions	RNA was extracted using Roche high pure RNA paraffin kit according to the manufacturer’s instructions	RNA was extracted using Roche high pure RNA paraffin kit according to the manufacturer’s instructions	RNA was extracted using Roche high pure RNA paraffin kit according to the manufacturer’s instructions	RNA was extracted using Roche high pure RNA paraffin kit according to the manufacturer’s instructions	RNA was extracted using Roche high pure RNA paraffin kit according to the manufacturer’s instructions	RNA was extracted using Roche high pure RNA paraffin kit according to the manufacturer’s instructions	RNA was extracted using Roche high pure RNA paraffin kit according to the manufacturer’s instructions	RNA was extracted using Roche high pure RNA paraffin kit according to the manufacturer’s instructions	RNA was extracted using Roche high pure RNA paraffin kit according to the manufacturer’s instructions	RNA was extracted using Roche high pure RNA paraffin kit according to the manufacturer’s instructions	RNA was extracted using Roche high pure RNA paraffin kit according to the manufacturer’s instructions	RNA was extracted using Roche high pure RNA paraffin kit according to the manufacturer’s instructions	RNA was extracted using Roche high pure RNA paraffin kit according to the manufacturer’s instructions	RNA was extracted using Roche high pure RNA paraffin kit according to the manufacturer’s instructions	RNA was extracted using Roche high pure RNA paraffin kit according to the manufacturer’s instructions	RNA was extracted using Roche high pure RNA paraffin kit according to the manufacturer’s instructions
!Sample_label_ch1	biotin	biotin	biotin	biotin	biotin	biotin	biotin	biotin	biotin	biotin	biotin	biotin	biotin	biotin	biotin	biotin	biotin	biotin	biotin	biotin	biotin
!Sample_label_protocol_ch1	Biotinylated cRNA were prepared with the Ambion MessageAmp kit for Illumina arrays	Biotinylated cRNA were prepared with the Ambion MessageAmp kit for Illumina arrays	Biotinylated cRNA were prepared with the Ambion MessageAmp kit for Illumina arrays	Biotinylated cRNA were prepared with the Ambion MessageAmp kit for Illumina arrays	Biotinylated cRNA were prepared with the Ambion MessageAmp kit for Illumina arrays	Biotinylated cRNA were prepared with the Ambion MessageAmp kit for Illumina arrays	Biotinylated cRNA were prepared with the Ambion MessageAmp kit for Illumina arrays	Biotinylated cRNA were prepared with the Ambion MessageAmp kit for Illumina arrays	Biotinylated cRNA were prepared with the Ambion MessageAmp kit for Illumina arrays	Biotinylated cRNA were prepared with the Ambion MessageAmp kit for Illumina arrays	Biotinylated cRNA were prepared with the Ambion MessageAmp kit for Illumina arrays	Biotinylated cRNA were prepared with the Ambion MessageAmp kit for Illumina arrays	Biotinylated cRNA were prepared with the Ambion MessageAmp kit for Illumina arrays	Biotinylated cRNA were prepared with the Ambion MessageAmp kit for Illumina arrays	Biotinylated cRNA were prepared with the Ambion MessageAmp kit for Illumina arrays	Biotinylated cRNA were prepared with the Ambion MessageAmp kit for Illumina arrays	Biotinylated cRNA were prepared with the Ambion MessageAmp kit for Illumina arrays	Biotinylated cRNA were prepared with the Ambion MessageAmp kit for Illumina arrays	Biotinylated cRNA were prepared with the Ambion MessageAmp kit for Illumina arrays	Biotinylated cRNA were prepared with the Ambion MessageAmp kit for Illumina arrays	Biotinylated cRNA were prepared with the Ambion MessageAmp kit for Illumina arrays
!Sample_taxid_ch1	9606	9606	9606	9606	9606	9606	9606	9606	9606	9606	9606	9606	9606	9606	9606	9606	9606	9606	9606	9606	9606
!Sample_hyb_protocol	Standard Illumina hybridization protocol	Standard Illumina hybridization protocol	Standard Illumina hybridization protocol	Standard Illumina hybridization protocol	Standard Illumina hybridization protocol	Standard Illumina hybridization protocol	Standard Illumina hybridization protocol	Standard Illumina hybridization protocol	Standard Illumina hybridization protocol	Standard Illumina hybridization protocol	Standard Illumina hybridization protocol	Standard Illumina hybridization protocol	Standard Illumina hybridization protocol	Standard Illumina hybridization protocol	Standard Illumina hybridization protocol	Standard Illumina hybridization protocol	Standard Illumina hybridization protocol	Standard Illumina hybridization protocol	Standard Illumina hybridization protocol	Standard Illumina hybridization protocol	Standard Illumina hybridization protocol
!Sample_scan_protocol	Standard Illumina scanning protocol	Standard Illumina scanning protocol	Standard Illumina scanning protocol	Standard Illumina scanning protocol	Standard Illumina scanning protocol	Standard Illumina scanning protocol	Standard Illumina scanning protocol	Standard Illumina scanning protocol	Standard Illumina scanning protocol	Standard Illumina scanning protocol	Standard Illumina scanning protocol	Standard Illumina scanning protocol	Standard Illumina scanning protocol	Standard Illumina scanning protocol	Standard Illumina scanning protocol	Standard Illumina scanning protocol	Standard Illumina scanning protocol	Standard Illumina scanning protocol	Standard Illumina scanning protocol	Standard Illumina scanning protocol	Standard Illumina scanning protocol
!Sample_description	c.8	c.8	c.8	c.8	c.8	c.8	c.8	c.8	c.8	c.8	c.8	c.8	c.8	c.8	c.8	c.8	c.8	c.8	c.8	c.8	c.8
!Sample_data_processing	The data were normalized with R/Bioconductor and Lumi package using a variance-stabilizing transformation and Robust Spline Normalization	The data were normalized with R/Bioconductor and Lumi package using a variance-stabilizing transformation and Robust Spline Normalization	The data were normalized with R/Bioconductor and Lumi package using a variance-stabilizing transformation and Robust Spline Normalization	The data were normalized with R/Bioconductor and Lumi package using a variance-stabilizing transformation and Robust Spline Normalization	The data were normalized with R/Bioconductor and Lumi package using a variance-stabilizing transformation and Robust Spline Normalization	The data were normalized with R/Bioconductor and Lumi package using a variance-stabilizing transformation and Robust Spline Normalization	The data were normalized with R/Bioconductor and Lumi package using a variance-stabilizing transformation and Robust Spline Normalization	The data were normalized with R/Bioconductor and Lumi package using a variance-stabilizing transformation and Robust Spline Normalization	The data were normalized with R/Bioconductor and Lumi package using a variance-stabilizing transformation and Robust Spline Normalization	The data were normalized with R/Bioconductor and Lumi package using a variance-stabilizing transformation and Robust Spline Normalization	The data were normalized with R/Bioconductor and Lumi package using a variance-stabilizing transformation and Robust Spline Normalization	The data were normalized with R/Bioconductor and Lumi package using a variance-stabilizing transformation and Robust Spline Normalization	The data were normalized with R/Bioconductor and Lumi package using a variance-stabilizing transformation and Robust Spline Normalization	The data were normalized with R/Bioconductor and Lumi package using a variance-stabilizing transformation and Robust Spline Normalization	The data were normalized with R/Bioconductor and Lumi package using a variance-stabilizing transformation and Robust Spline Normalization	The data were normalized with R/Bioconductor and Lumi package using a variance-stabilizing transformation and Robust Spline Normalization	The data were normalized with R/Bioconductor and Lumi package using a variance-stabilizing transformation and Robust Spline Normalization	The data were normalized with R/Bioconductor and Lumi package using a variance-stabilizing transformation and Robust Spline Normalization	The data were normalized with R/Bioconductor and Lumi package using a variance-stabilizing transformation and Robust Spline Normalization	The data were normalized with R/Bioconductor and Lumi package using a variance-stabilizing transformation and Robust Spline Normalization	The data were normalized with R/Bioconductor and Lumi package using a variance-stabilizing transformation and Robust Spline Normalization
!Sample_platform_id	GPL10558	GPL10558	GPL10558	GPL10558	GPL10558	GPL10558	GPL10558	GPL10558	GPL10558	GPL10558	GPL10558	GPL10558	GPL10558	GPL10558	GPL10558	GPL10558	GPL10558	GPL10558	GPL10558	GPL10558	GPL10558
!Sample_contact_name	John,E,Harris	John,E,Harris	John,E,Harris	John,E,Harris	John,E,Harris	John,E,Harris	John,E,Harris	John,E,Harris	John,E,Harris	John,E,Harris	John,E,Harris	John,E,Harris	John,E,Harris	John,E,Harris	John,E,Harris	John,E,Harris	John,E,Harris	John,E,Harris	John,E,Harris	John,E,Harris	John,E,Harris
!Sample_contact_laboratory	Harris Lab	Harris Lab	Harris Lab	Harris Lab	Harris Lab	Harris Lab	Harris Lab	Harris Lab	Harris Lab	Harris Lab	Harris Lab	Harris Lab	Harris Lab	Harris Lab	Harris Lab	Harris Lab	Harris Lab	Harris Lab	Harris Lab	Harris Lab	Harris Lab
!Sample_contact_department	Dermatology	Dermatology	Dermatology	Dermatology	Dermatology	Dermatology	Dermatology	Dermatology	Dermatology	Dermatology	Dermatology	Dermatology	Dermatology	Dermatology	Dermatology	Dermatology	Dermatology	Dermatology	Dermatology	Dermatology	Dermatology
!Sample_contact_institute	University of Massachusetts Medical School	University of Massachusetts Medical School	University of Massachusetts Medical School	University of Massachusetts Medical School	University of Massachusetts Medical School	University of Massachusetts Medical School	University of Massachusetts Medical School	University of Massachusetts Medical School	University of Massachusetts Medical School	University of Massachusetts Medical School	University of Massachusetts Medical School	University of Massachusetts Medical School	University of Massachusetts Medical School	University of Massachusetts Medical School	University of Massachusetts Medical School	University of Massachusetts Medical School	University of Massachusetts Medical School	University of Massachusetts Medical School	University of Massachusetts Medical School	University of Massachusetts Medical School	University of Massachusetts Medical School
!Sample_contact_address	364 Plantation St	364 Plantation St	364 Plantation St	364 Plantation St	364 Plantation St	364 Plantation St	364 Plantation St	364 Plantation St	364 Plantation St	364 Plantation St	364 Plantation St	364 Plantation St	364 Plantation St	364 Plantation St	364 Plantation St	364 Plantation St	364 Plantation St	364 Plantation St	364 Plantation St	364 Plantation St	364 Plantation St
!Sample_contact_city	Worcester	Worcester	Worcester	Worcester	Worcester	Worcester	Worcester	Worcester	Worcester	Worcester	Worcester	Worcester	Worcester	Worcester	Worcester	Worcester	Worcester	Worcester	Worcester	Worcester	Worcester
!Sample_contact_state	MA	MA	MA	MA	MA	MA	MA	MA	MA	MA	MA	MA	MA	MA	MA	MA	MA	MA	MA	MA	MA
!Sample_contact_zip/postal_code	1605	1605	1605	1605	1605	1605	1605	1605	1605	1605	1605	1605	1605	1605	1605	1605	1605	1605	1605	1605	1605
!Sample_contact_country	USA	USA	USA	USA	USA	USA	USA	USA	USA	USA	USA	USA	USA	USA	USA	USA	USA	USA	USA	USA	USA
!Sample_supplementary_file	ftp://ftp.ncbi.nlm.nih.gov/geo/samples/GSM3091nnn/GSM3091775/suppl/GSM3091775_9479628048_A_Grn.idat.gz	ftp://ftp.ncbi.nlm.nih.gov/geo/samples/GSM3091nnn/GSM3091776/suppl/GSM3091776_9479628048_C_Grn.idat.gz	ftp://ftp.ncbi.nlm.nih.gov/geo/samples/GSM3091nnn/GSM3091777/suppl/GSM3091777_9479628048_E_Grn.idat.gz	ftp://ftp.ncbi.nlm.nih.gov/geo/samples/GSM3091nnn/GSM3091778/suppl/GSM3091778_9479628050_A_Grn.idat.gz	ftp://ftp.ncbi.nlm.nih.gov/geo/samples/GSM3091nnn/GSM3091779/suppl/GSM3091779_9479628050_C_Grn.idat.gz	ftp://ftp.ncbi.nlm.nih.gov/geo/samples/GSM3091nnn/GSM3091780/suppl/GSM3091780_9479628050_D_Grn.idat.gz	ftp://ftp.ncbi.nlm.nih.gov/geo/samples/GSM3091nnn/GSM3091781/suppl/GSM3091781_9479628050_E_Grn.idat.gz	ftp://ftp.ncbi.nlm.nih.gov/geo/samples/GSM3091nnn/GSM3091782/suppl/GSM3091782_9479628048_F_Grn.idat.gz	ftp://ftp.ncbi.nlm.nih.gov/geo/samples/GSM3091nnn/GSM3091783/suppl/GSM3091783_9479628048_G_Grn.idat.gz	ftp://ftp.ncbi.nlm.nih.gov/geo/samples/GSM3091nnn/GSM3091784/suppl/GSM3091784_9479628048_H_Grn.idat.gz	ftp://ftp.ncbi.nlm.nih.gov/geo/samples/GSM3091nnn/GSM3091785/suppl/GSM3091785_9479628048_I_Grn.idat.gz	ftp://ftp.ncbi.nlm.nih.gov/geo/samples/GSM3091nnn/GSM3091786/suppl/GSM3091786_9479628048_J_Grn.idat.gz	ftp://ftp.ncbi.nlm.nih.gov/geo/samples/GSM3091nnn/GSM3091787/suppl/GSM3091787_9479628048_K_Grn.idat.gz	ftp://ftp.ncbi.nlm.nih.gov/geo/samples/GSM3091nnn/GSM3091788/suppl/GSM3091788_9479628048_L_Grn.idat.gz	ftp://ftp.ncbi.nlm.nih.gov/geo/samples/GSM3091nnn/GSM3091789/suppl/GSM3091789_9479628050_F_Grn.idat.gz	ftp://ftp.ncbi.nlm.nih.gov/geo/samples/GSM3091nnn/GSM3091790/suppl/GSM3091790_9479628050_G_Grn.idat.gz	ftp://ftp.ncbi.nlm.nih.gov/geo/samples/GSM3091nnn/GSM3091791/suppl/GSM3091791_9479628050_H_Grn.idat.gz	ftp://ftp.ncbi.nlm.nih.gov/geo/samples/GSM3091nnn/GSM3091792/suppl/GSM3091792_9479628050_I_Grn.idat.gz	ftp://ftp.ncbi.nlm.nih.gov/geo/samples/GSM3091nnn/GSM3091793/suppl/GSM3091793_9479628050_J_Grn.idat.gz	ftp://ftp.ncbi.nlm.nih.gov/geo/samples/GSM3091nnn/GSM3091794/suppl/GSM3091794_9479628050_K_Grn.idat.gz	ftp://ftp.ncbi.nlm.nih.gov/geo/samples/GSM3091nnn/GSM3091795/suppl/GSM3091795_9479628050_L_Grn.idat.gz
!Sample_data_row_count	47303	47303	47303	47303	47303	47303	47303	47303	47303	47303	47303	47303	47303	47303	47303	47303	47303	47303	47303	47303	47303
!Sample_relation
!series_matrix_table_begin
ID_REF	GSM3091775	GSM3091776	GSM3091777	GSM3091778	GSM3091779	GSM3091780	GSM3091781	GSM3091782	GSM3091783	GSM3091784	GSM3091785	GSM3091786	GSM3091787	GSM3091788	GSM3091789	GSM3091790	GSM3091791	GSM3091792	GSM3091793	GSM3091794	GSM3091795
ILMN_1343291	12.97645629	12.08727218	11.05675032	12.87892835	12.95955837	14.00905818	7.213090872	12.78403553	13.32262518	13.13782096	13.52933765	13.41648196	13.95577546	13.575284	13.6620865	13.00167114	13.95088778	13.59361504	13.71031059	13.69010258	13.82554857
ILMN_1343295	11.83957168	11.60839445	11.96751422	12.03289347	11.44584392	10.21131221	11.88279035	11.66807818	10.49570525	11.13714764	10.2699412	11.18841173	9.871471726	10.41471237	10.43648889	10.51328265	10.55607826	10.8854	10.84816191	10.3066498	10.1491041
ILMN_1651199	7.221885054	7.296204221	7.31326729	7.253190705	7.223765139	7.302988161	7.209003947	7.252726544	7.318487714	7.323892141	7.314250057	7.340504092	7.289723966	7.328760178	7.331104365	7.316975492	7.310777369	7.244672589	7.283225038	7.408856662	7.345227343
ILMN_1651209	10.54501369	11.44475893	7.338199497	11.07738952	7.193544502	8.76998728	11.85504439	8.512871886	8.376052216	8.917882399	8.86966117	9.107298335	9.03044721	8.743740743	9.17347274	9.308693428	9.149409501	9.209117974	8.795576467	8.931062369	8.687308702
ILMN_1651210	7.266162141	7.295068497	7.413635385	7.32654903	7.219231794	7.363176619	7.195537472	7.292372837	7.329847586	7.387154558	7.290243872	7.344138994	7.337544177	7.305133047	7.339230885	7.292391034	7.28134262	7.290832081	7.222643204	7.304538102	7.346059
ILMN_1651221	7.950384594	7.296853137	7.684307675	7.604484599	7.223314398	7.541476756	7.414281	7.665550138	7.678828873	7.495268616	7.495447319	7.557781779	7.561245189	7.597681026	7.622253413	7.592034253	7.542301909	7.566264146	7.713529552	7.51542775	7.532665751
ILMN_1651228	13.98821468	12.52356539	12.99856501	14.09776348	12.33095901	13.88850719	13.00397124	13.95544335	13.99002945	13.98523888	13.81750126	13.70974507	13.89440423	13.83642075	14.34937117	14.26667727	14.0950259	14.39048493	14.05064691	14.06371281	14.17119397
ILMN_1651229	13.26575161	13.80119349	13.60085444	13.2136347	13.49015175	13.19254422	13.78089705	12.96957288	13.16707829	12.93240925	12.65537032	13.22451972	12.67146821	12.74385019	12.33315673	12.34031232	12.68088483	12.6983543	12.40804647	12.83855875	12.65566106
ILMN_1651230	7.223916033	7.210665547	7.163041498	7.243478278	7.244355766	7.237457884	7.212276306	7.276917927	7.258820718	7.242395644	7.257418554	7.30070533	7.251827222	7.27640619	7.267871868	7.354771297	7.405449709	7.236749416	7.347977229	7.27580387	7.241322847
ILMN_1651232	7.530020297	7.285064577	7.411796038	7.435643452	7.190490603	7.418993094	7.223868313	7.513184045	7.423412442	7.393340848	7.469008765	7.454335517	7.41096582	7.45165726	7.463088708	7.372820544	7.30551363	7.427840123	7.427627361	7.389452999	7.39536433
ILMN_1651235	13.45615196	13.2465536	7.317843268	12.84392355	7.19215076	11.60095218	12.99817815	11.70170587	10.36269029	11.33295414	12.10429067	11.38838682	11.73931036	11.68449005	11.19306279	12.25166335	11.15098858	10.55384037	11.91350852	10.58671982	10.20471967
ILMN_1651236	7.835124693	11.85595574	8.121875001	8.151190809	8.899720561	8.706981549	8.973591844	10.14764656	11.17890786	10.49938304	10.01402846	11.26508338	9.522853218	10.06812282	10.0731009	10.68485254	10.39719668	10.4212494	10.8148714	10.19570087	9.57206391
ILMN_1651237	7.232024915	7.263366007	7.198357893	7.225953507	7.167755733	10.79025856	7.189227649	10.63739944	11.19474841	11.54255348	11.33129195	10.66268021	10.53008422	10.88846099	11.96581235	8.548373014	11.23744187	10.35448268	10.90423852	10.84870543	10.8264659
ILMN_1651238	7.235827322	7.2618982	7.221323265	7.214024288	7.202183673	9.89275074	7.214288387	10.28332515	10.31963237	9.972245842	10.25525476	9.801059723	9.773505469	9.742276963	9.822246461	9.462901526	9.810545612	10.52116227	9.426077909	10.33539773	10.38785896
ILMN_1651249	7.261981163	7.298207208	7.305282032	7.430630709	7.215085373	7.293278703	7.204918696	7.259622282	7.371047977	7.348387859	7.379693823	7.33902508	7.407702238	7.36830242	7.344062362	7.357027325	7.287620321	7.321531485	7.345281167	7.376012893	7.271930665
ILMN_1651253	7.24127249	7.282912637	7.193033845	7.222095115	7.193272858	7.192293705	7.210243762	7.255563495	7.301460665	7.21037511	7.23551104	7.239178829	7.152032613	7.13498695	7.263065348	7.201974799	7.241794061	7.216231122	7.100993887	7.275542679	7.226528172
ILMN_1651254	13.59504901	12.78702478	13.17725555	13.50514515	13.37075196	13.70451334	13.30912825	13.85899915	13.82429325	13.76785318	14.11189757	14.16327786	13.92597866	13.8381156	13.92295897	13.75716949	14.10438142	13.78259997	14.19302424	13.87076163	13.90806834
ILMN_1651259	8.081291032	7.656984078	8.082169268	7.87613037	9.249611868	7.564131279	9.353934358	7.555229426	7.649825719	7.542382699	7.518026054	7.562460051	7.544587903	7.51482006	7.582295956	7.539691512	7.519625507	7.57294906	7.575079498	7.550632206	7.479662653
ILMN_1651260	7.209157299	7.21960102	7.253732627	7.214016204	7.196564083	7.268319719	7.192104706	7.203761642	7.215069982	7.221231213	7.146115245	7.14815898	7.187445135	7.230550795	7.189750194	7.191462353	7.178988449	7.196734491	7.171930167	7.227141588	7.224935289
ILMN_1651262	14.23854012	8.459517176	7.632589686	13.33344956	10.7350742	14.22305867	8.967977959	14.58405405	14.36254505	14.49542119	14.55087271	14.56257667	14.4468909	14.49643829	14.52127848	14.32269773	14.35712667	14.19642475	14.66667152	14.50141068	14.23751365
ILMN_1651268	11.60261921	9.208228593	8.426011509	11.52011943	10.97998533	10.42189029	9.669687895	11.70933581	12.39093883	11.97359358	11.86571946	12.06520193	11.61430644	11.97654978	11.92304886	12.38195078	11.90079493	11.86354795	11.83674552	11.36914513	11.3238196
ILMN_1651278	7.481431201	7.296234261	7.805082093	8.331655741	11.57607949	8.390907208	7.186904666	7.621702664	7.719787309	7.508732448	7.722855638	7.447865807	7.581042871	7.808080756	7.669316967	7.68083419	7.512305359	7.854156997	7.58300917	7.779078878	7.810072734
ILMN_1651279	8.125626548	11.01785376	10.92308053	8.42650122	11.43405495	7.589384242	11.81000034	7.498636168	7.569202518	7.446227984	7.473786739	7.61982152	7.50532688	7.561661226	7.580205232	7.516846008	7.545902395	7.549342427	7.520050748	7.481247521	7.532022484
ILMN_1651281	7.289421143	7.245982551	7.298069319	7.265693847	7.198060911	7.235673356	7.211937612	7.344220058	7.307374169	7.268585659	7.235426267	7.298287759	7.206578361	7.332185527	7.216025401	7.230098796	7.132649858	7.263722608	7.327119713	7.300208522	7.327526522
ILMN_1651282	7.771209695	7.620172863	7.480857477	7.719693675	7.883259601	8.197450064	8.30474118	7.596900832	8.275673429	7.510089439	7.780748118	7.510546476	8.204120575	7.501003061	7.639489027	7.480150858	7.513358145	7.53811973	8.371269259	7.477812828	7.666174036
ILMN_1651285	11.05098466	10.93810149	9.297904905	11.21658358	9.340106049	10.75671514	9.452909721	8.992326346	9.24121962	8.249293418	8.537887336	8.9773457	8.993968568	8.75456215	9.017110523	8.890689285	8.797144729	9.178278952	8.986272619	9.75416277	9.360886883
ILMN_1651286	7.207160528	7.294114202	7.332354103	7.326207671	7.21669331	11.12690532	7.209527949	11.72847477	11.96179396	12.05730609	11.95952003	12.59567987	12.35317606	12.317442	11.66204538	11.65550171	12.27518771	11.92664843	12.38179227	11.44753882	12.23297994
ILMN_1651288	7.970227433	7.503482342	8.382688248	7.767023765	7.359087035	7.681975233	7.204899633	7.806405898	7.78013561	7.816582262	7.680702014	7.687713756	7.609395918	7.668018945	7.716204855	7.772312041	7.652158683	7.612751217	7.600040513	7.558425566	7.616097287
ILMN_1651292	11.71178205	11.63807732	7.326704224	11.64049152	7.233609087	8.737613804	7.21341047	8.76044044	9.870330957	9.746526208	8.76503319	9.045555895	9.345310449	9.3182701	9.424011898	9.475119753	9.137472615	9.260673503	9.452300993	8.710734859	8.946364572
ILMN_1651296	7.448231643	7.300662724	7.362205294	7.240889274	7.223004094	7.404440508	7.216481279	7.390569773	7.287413464	7.359924035	7.438628827	7.393295681	7.371298253	7.445478859	7.47325709	7.378410381	7.509208207	7.343608654	7.400750273	7.393393126	7.462927973
ILMN_1651303	7.631101769	7.762541045	7.345864767	10.90744375	7.217384009	8.462707332	7.230092989	8.718786681	9.0168035	9.097038662	9.067366106	10.14848724	10.06136456	8.744525961	8.559442459	10.36938029	9.366128752	9.2914273	9.215815628	8.710097566	8.311634587
ILMN_1651309	7.201421842	7.230560639	7.190274416	7.214615467	7.171735581	7.269016439	7.137733597	7.186612897	7.239196166	7.855156594	7.658051986	7.253639417	7.17839641	7.207137021	7.157423143	8.134501689	7.274396037	7.224799059	7.264793632	7.283125655	7.329137594
ILMN_1651310	7.210556216	7.298501909	7.327377289	7.240739821	7.211557673	7.286470087	7.189546324	7.303473327	7.30572004	7.263452803	7.278819404	7.28673199	7.2136044	7.198530112	7.186335821	7.316912444	7.260143582	7.244636104	7.299263126	7.2438152	7.25034909
ILMN_1651315	9.993383136	9.773004841	10.36981974	10.44782245	7.502135972	8.674588023	11.58325066	8.227696257	8.096776751	8.279262844	7.991398244	8.128903862	8.130099709	8.355047494	8.360493116	8.556471382	8.520085509	8.390163295	8.188222895	8.633961964	8.385078477
ILMN_1651316	9.300880284	7.302838241	10.34452811	11.11292098	8.498302789	9.785593144	11.62891791	8.531694049	8.319339571	9.601710693	9.894158308	8.504974013	8.710110955	8.570564663	8.927149793	8.651292872	8.893077818	8.561881562	8.366843492	8.564178222	9.040918017
ILMN_1651325	7.419644923	7.553461031	7.56005289	7.405222348	7.21709099	7.285842729	7.708877512	7.366965067	7.371780546	7.317440966	7.338578095	7.359304552	7.398083367	7.378154418	7.265083701	7.384280253	7.291927454	7.284161267	7.431174456	7.30534231	7.298779467
ILMN_1651328	7.831453008	7.574174762	8.009052227	7.689443968	7.416466821	7.394965078	7.370185397	7.530051013	7.352203973	7.480457899	7.412176381	7.41588799	7.44605702	7.471317595	7.471465324	7.472762141	7.467745636	7.389919461	7.436011521	7.374695576	7.460657325
ILMN_1651329	7.547036301	7.983962399	7.430493216	7.482112888	7.322770379	7.483538289	7.211531224	7.59620827	7.514405532	7.467603261	7.45638618	7.478865849	7.424728289	7.535573649	7.443977436	7.427378146	7.479220437	7.47100454	7.54399557	7.484941148	7.46647062
ILMN_1651330	7.310381723	7.51939095	7.324265725	7.326647621	8.164572182	7.299902037	7.211531283	7.330745767	7.281887349	7.322289461	7.244999816	7.239120119	7.603935638	7.371882244	7.280108226	7.381579896	7.317618361	7.392735804	7.375633118	7.325952154	7.29770179
ILMN_1651336	11.99693822	12.19924675	12.01472368	12.03157336	7.220541311	11.30557535	12.56137381	11.41578653	11.8044495	11.16732743	11.21809173	11.50040275	11.28404394	11.81237009	11.05757477	11.4686717	11.50181848	11.5077812	11.56552397	11.21586242	11.31515582
ILMN_1651339	11.10509236	7.281910941	7.497691039	7.255198478	7.186017013	9.645837312	7.30483599	11.19765664	11.36189124	11.48897243	10.55972722	11.49545141	9.556159778	9.538384929	10.53867067	11.11838812	11.02968157	10.66115577	10.72206659	10.52409202	10.12812411
ILMN_1651341	8.487743988	8.244990712	7.744832817	7.762574394	11.44399677	7.939806567	10.71791551	8.145344298	7.831738926	8.030152931	7.824852208	8.068678655	8.024375295	8.083590238	7.847584247	7.917971607	7.89584691	7.638411239	8.318840876	7.900058813	7.669990028
ILMN_1651343	11.67297157	11.58861806	7.382572045	11.78768623	7.225548462	10.15411897	10.7539345	11.3419224	10.77761907	11.4353934	10.78669244	10.92905264	10.42013572	10.93062718	10.81264256	11.94778365	11.08263363	10.97537107	11.4959836	10.74257448	10.10120727
ILMN_1651346	10.95970926	7.356405357	7.338666484	9.543239885	7.218888794	10.51009467	7.187771245	9.525399487	9.783617925	9.154894706	10.24399117	9.76287363	9.737728997	8.887281822	10.35982426	9.297954405	9.570292365	10.0990173	9.30897505	10.38948943	10.35633317
ILMN_1651347	7.491103986	7.230590812	7.340497828	10.78533885	7.603569245	10.4868423	8.897451586	10.81911599	11.0246855	10.83982845	11.08733319	11.32150012	10.63295447	11.40594433	10.7311174	10.80825286	10.92712348	11.39802308	10.26050028	11.2021291	11.12028823
ILMN_1651351	7.210735099	7.266438344	7.347122985	7.280794866	7.21520864	7.251466038	7.194506303	7.295513865	7.197196234	7.309921062	7.306299031	7.274905924	7.294212203	7.16373174	7.303236256	7.289554078	7.231985591	7.274454041	7.307206184	7.285330339	7.29419517
ILMN_1651354	13.63816877	12.30454735	7.344045694	13.09490491	7.372898208	14.21026623	7.286083613	14.57273485	14.60887465	14.57442967	14.70512882	14.43538939	14.5213889	14.27393315	14.64371609	14.69766004	14.52290899	14.50473532	14.77122838	14.65715987	14.37662792
ILMN_1651358	7.240998542	7.239699188	7.316353669	7.284483983	7.202080917	8.015647929	7.208210227	7.423588648	7.362236941	7.302742618	7.366149158	7.354003473	7.73237528	8.559741153	7.349308843	7.262809233	7.282811671	8.002417869	7.336359056	7.559012277	7.647126871
ILMN_1651364	7.239065656	7.282177128	7.435480209	7.295343144	7.226328008	8.632434245	7.221144096	9.204794162	8.948895458	8.834572955	9.009012435	9.594351017	9.179541182	7.359686826	8.446178835	7.358702972	8.944063549	8.761556946	8.245640959	9.39823516	9.468931584
ILMN_1651365	7.20084107	7.208944447	7.309882204	7.247816064	7.215573147	7.519669724	7.212608349	7.17622009	7.294143086	7.174795592	7.250693902	7.360312246	7.294345626	7.207691423	7.341299854	7.284340339	7.344775878	7.275213387	7.242232912	7.217040644	7.216328101
ILMN_1651369	7.368131126	7.434963659	7.349115235	7.513882472	7.290266821	7.329371461	7.465833199	7.424649219	7.341693282	7.340771732	7.32364952	7.389002344	7.376907236	7.36952727	7.368280223	7.418117049	7.389794037	7.356097475	7.401257793	7.250772604	7.389105813
ILMN_1651370	10.96332699	11.65698088	7.118984946	12.22105305	7.222894589	10.27189345	7.185567521	10.90199454	11.0578253	11.04943699	10.95902344	11.02426105	10.65774995	11.12033966	10.78454437	11.33520275	11.33075941	10.87629212	11.32124866	10.84118752	10.91895664
ILMN_1651373	7.213028732	7.290548813	7.267446743	7.234334283	7.186676294	7.235112024	7.179770742	7.209202624	8.57417808	7.308721344	7.280880929	7.182182643	7.328648083	7.261413847	7.249114161	7.245399461	7.293184296	7.210394151	7.354036469	7.214781655	7.20076333
ILMN_1651378	13.05730062	12.5816375	12.95006997	12.9553716	13.17473453	13.16358083	11.79905467	14.06088794	14.08634226	14.20166254	14.2828692	14.11285555	13.77138602	13.72943237	13.70350614	14.13237761	13.91260455	14.10294457	13.90593492	13.44359553	13.67579367
ILMN_1651380	7.409407635	7.487697693	7.614525889	7.434979744	8.398010267	7.437152257	7.383073249	7.423623353	7.46903928	7.389768203	7.410264829	7.425420699	7.47063832	7.433487455	7.325426113	7.447519304	7.368203889	7.39759581	7.438025979	7.370756741	7.392081222
ILMN_1651385	12.01885585	7.233753153	7.295667969	12.77772869	13.19845473	11.5866809	7.203477436	11.33835788	11.57628656	11.48427606	11.84782266	11.35475047	11.09337022	10.80587072	11.26504806	10.584266	11.29139992	11.5817416	9.779506778	11.01741553	10.12718305
ILMN_1651388	7.225423978	7.270413763	7.328648774	7.431711381	7.187890698	7.27024242	7.19656742	7.280277023	7.365805676	7.414323784	7.335571842	7.285774931	7.456558602	7.364624169	7.408567592	7.47750856	7.402302387	7.425058716	7.365093243	7.362999381	7.340041258
ILMN_1651395	7.426056283	7.3034882	7.358584414	7.339889339	7.320604005	7.319001029	7.226161963	7.290282399	7.39027666	7.400392	7.359627105	7.365215219	7.445003871	7.289412114	7.323493126	7.451881414	7.368072365	7.393408286	7.320557702	7.377847616	7.283326113
ILMN_1651396	7.298385628	7.268934873	7.341805308	7.231700003	7.739692638	7.350400849	7.21174275	7.31693699	7.21921224	7.307648359	7.236519457	7.334051319	7.210817748	7.251926317	7.251110331	7.24282155	7.328081748	7.291174781	7.226641987	7.300401259	7.330703541
ILMN_1651403	8.041983921	8.300193995	7.597610756	7.635230222	8.383484114	7.662732409	7.745954489	7.66366535	7.771915305	7.659913331	7.719826622	7.457194534	7.616493058	7.525227047	7.623135872	7.531875159	7.581946094	7.636506288	7.541504022	7.695557758	7.631194372
ILMN_1651404	7.320614117	7.290669686	7.245979668	7.23953864	7.219470489	7.224180817	7.196996684	7.247373078	7.231810231	7.27317887	7.217838662	7.310790312	7.264087612	7.382628555	7.170193704	7.311197029	7.300066054	7.309279451	7.258774831	7.282754834	7.279703077
ILMN_1651405	14.38781201	13.55340142	13.50982602	14.46471257	13.22182672	14.56265074	12.92513553	14.05076265	14.1806987	13.95093872	14.29753046	13.99496166	14.57965533	13.868505	14.01513763	14.00324204	14.02338632	14.13060413	13.7613611	14.3029069	14.32367994
ILMN_1651408	7.387681674	7.300254683	7.317432747	7.511958475	7.224719252	7.490852251	11.33599548	7.439909776	7.462729361	7.485394746	7.515460012	7.447891489	7.516978431	7.510426529	7.485669961	7.42267888	7.376221605	7.439432556	7.551307954	7.444080403	7.4793376
ILMN_1651415	11.68169953	12.4151864	8.271604445	12.05067492	13.08653799	10.15216143	8.26058505	9.684077436	11.06732302	11.2223987	11.51700262	10.02956954	10.90652035	9.777150271	11.22240127	10.9498626	8.690212527	10.5442952	9.419522285	8.786986663	10.49332444
ILMN_1651428	9.052055742	11.44849098	11.57878228	9.413319667	11.53522981	11.5157746	11.88482668	10.94813509	10.19525057	10.80040519	10.17862251	10.5709419	11.62769457	11.1480959	10.34279581	10.84380831	11.03853435	10.83544206	11.09094387	11.69265253	11.47041834
ILMN_1651429	15.25227205	14.89250748	13.92084304	14.90782417	14.27516515	14.95534183	14.56615736	13.6557245	13.96926672	13.68332507	14.82056138	13.46307827	14.64976403	13.74449074	14.03417436	13.76312003	14.1213309	13.95224564	13.82871426	14.26622018	14.24339294
ILMN_1651430	7.312313154	7.178584998	7.264994946	7.248930215	7.199343488	7.934001959	7.179426545	7.345270522	7.53957745	10.6014172	7.49738901	7.47632205	7.431520506	7.56110503	7.419360599	7.155210368	7.529283661	7.555665869	7.353391888	7.443067525	7.566507759
ILMN_1651433	7.436100188	7.352920047	7.404202241	10.02140425	7.21889994	8.45961114	7.214313932	9.265470073	9.430352583	8.078843517	9.724121217	9.341979675	8.56663253	8.607657111	9.401233797	8.461642999	8.791537585	9.303172649	9.284807093	9.182549	9.274088072
ILMN_1651435	7.290016126	7.306813398	7.266073865	7.302755657	8.242228226	7.261543656	7.208420796	7.324792421	7.37600694	7.301055924	7.319816184	7.256720651	7.330005401	7.370729544	7.348273154	7.28870529	7.343369032	7.329990695	7.395031993	7.335596886	7.395707535
ILMN_1651437	8.078866022	7.294430846	7.489921442	7.385053475	7.442509607	11.62710082	7.207153252	11.41558991	12.71149167	12.75015019	7.518768906	12.02022674	10.54929808	12.88058184	11.59584782	7.444773373	12.20676741	11.99018269	9.679839956	10.96537892	12.07027865
ILMN_1651438	7.320878793	7.280211649	7.326928898	7.438409325	7.274038201	10.74186164	7.404504742	11.52214982	11.32808975	11.17347244	11.58688335	11.81355026	10.88750489	11.53169782	11.47272234	11.05421801	11.46343755	10.77639303	11.69961655	10.98996913	11.47784328
ILMN_1651447	7.248729926	7.295396193	7.242932824	7.22914847	7.262828602	7.380282544	7.564567821	7.231941184	7.345530607	7.328575209	7.32648539	7.317410544	7.310572033	7.320182263	7.333027002	7.349730305	7.31063085	7.317130256	7.286271838	7.325254118	7.362422353
ILMN_1651453	7.288376661	7.383198075	7.371911387	7.316993151	8.605260607	7.333475557	7.211956774	7.279869791	7.33488398	7.385883575	7.370540939	7.274528698	7.305565179	7.402355443	7.371654015	7.382142683	7.339221877	7.362925433	7.356055384	7.312805837	7.319731881
ILMN_1651456	7.210808543	7.264838534	7.308409399	7.403432575	7.223918401	7.221843427	7.217817154	7.264743998	7.263364839	7.220398162	7.249642694	7.274898896	7.316716813	7.199794987	7.296439499	7.19315137	7.278700954	7.274858147	7.247743307	7.266884086	7.279893158
ILMN_1651457	7.311826169	7.792948107	7.335463322	7.344510013	13.11260655	7.340184586	7.200302193	7.271283227	7.357112093	7.33431071	7.372324654	7.395668595	7.408944292	7.358181171	7.400535162	7.336740897	7.363170954	7.832362613	7.275155955	7.497717026	7.307493059
ILMN_1651464	7.70995638	8.483401155	7.718584616	7.300391752	8.010371425	7.550747754	7.296973368	7.590852456	7.529506024	7.604448267	7.517205534	7.54420122	7.57627264	7.564990331	7.568933767	7.523902976	7.590339547	7.60824038	7.592363796	7.581071249	7.638019773
ILMN_1651466	7.408389698	7.278758028	7.346945568	7.271910704	7.388903499	7.297807956	7.247217737	7.279827626	7.347525808	7.363228826	7.34155074	7.329926968	7.357802964	7.292622145	7.316994871	7.387238967	7.388619596	7.327146315	7.395090829	7.391178367	7.298428387
ILMN_1651470	7.410063814	7.49981858	7.348638215	7.288506889	7.221869896	7.342152186	7.214798023	7.397246971	7.284160531	7.339782079	7.373471458	7.312936147	7.302575907	7.374853645	7.408138594	7.455831935	7.413810124	7.31432222	7.311339751	7.33770804	7.291255138
ILMN_1651477	7.204693289	7.259979491	7.102117864	7.482256536	7.208413703	7.212720687	7.168916036	7.288343957	7.359866711	7.289361076	7.255694341	7.353298269	7.294118183	7.362708374	7.309621986	7.295071641	7.284655219	7.272779813	7.355639185	7.229129763	7.262373955
ILMN_1651486	7.373841947	7.337138093	7.411732602	7.248038965	7.225093497	7.418309227	7.212876117	7.6187965	7.468020807	7.687977243	7.461496237	7.598657818	7.465692975	7.523460705	7.502423199	7.38038574	7.505610913	7.402872687	7.446833312	7.448176975	7.324040551
ILMN_1651488	7.632692041	7.289795022	8.403078733	7.636227064	7.417215627	7.44937762	7.545737706	7.487395447	7.490741656	7.726583019	7.493969	7.496273362	7.440773372	7.576585142	7.543858031	7.486538838	7.562497764	7.477108198	7.45882923	7.450538317	7.496936531
ILMN_1651490	7.206996393	7.288647045	7.343082794	11.83042415	7.243345291	7.549107559	7.216354693	7.291929805	7.295173251	7.28346465	7.298742362	7.389096375	7.304579778	7.273491961	7.351288184	7.328935254	7.344519457	7.261436961	7.339121484	7.281252398	7.320479343
ILMN_1651492	7.77445819	12.2315948	7.5931953	7.461608996	8.584212483	7.765247616	12.72991412	7.52304399	7.465164175	7.480378351	8.187759208	7.510053657	9.438577919	10.66146655	7.473249696	7.458316323	8.712925115	8.110115257	7.461856069	8.105134868	7.888599785
ILMN_1651495	7.212291972	7.237387782	7.193283323	7.27529826	7.213896173	7.243092789	7.185678243	7.29602914	7.359921187	7.279414384	7.186477443	7.33461099	7.330049075	7.424761118	7.163751697	7.350360765	7.235595489	7.312069597	7.262662516	7.304994031	7.272210669
ILMN_1651496	11.94849878	7.187763846	7.219336174	12.58546381	7.210463512	13.44877574	12.91204864	13.9606893	13.8978478	14.09068673	14.26881293	14.36725826	12.72873445	14.01956418	14.24819529	13.02621659	14.18163922	14.12128349	13.12104985	14.04604952	14.02213418
ILMN_1651498	12.37502515	11.55181163	7.126011989	11.97714285	7.18089758	13.28795231	12.93192116	9.09873256	10.52669382	10.54408323	9.119886935	9.844392938	10.65295031	10.885022	10.52907334	11.22074104	10.06646409	11.22122433	7.135871328	11.91386569	11.69142165
ILMN_1651499	12.5241934	13.48079653	13.32834571	12.83291958	13.78300778	11.65151913	13.89227582	12.4254773	12.21002958	12.60356159	12.00199468	12.52676082	11.93878116	12.53837558	12.23223564	12.27855974	12.16844953	12.13616672	12.01822364	11.71411556	11.70228857
ILMN_1651501	7.255519605	7.277155708	12.37545489	7.252507044	7.202531964	9.372540505	7.192786799	10.55502184	11.02073139	11.4849777	10.43750086	11.10041437	11.03719362	11.42904324	11.5099255	11.47658087	11.60658309	11.29434257	10.20596695	10.98750533	10.90726611
ILMN_1651504	12.10746381	11.56076796	12.3394122	12.38914292	7.202792111	11.7399237	12.46710542	11.89589615	11.79456539	11.96350533	11.68004774	11.44048959	11.80108144	11.75707305	11.99375618	11.68162058	12.10572221	11.79357777	12.16532932	11.72282428	11.67851687
ILMN_1651506	7.486888828	7.434592302	7.369373368	7.261368445	7.68375331	7.829620059	8.930213577	7.34345906	7.395746761	7.345856703	7.402399319	7.313688949	7.806261459	7.454714319	7.368900266	7.3456226	8.019177176	7.378681885	7.445124676	7.578974258	7.986274776
ILMN_1651507	7.233159511	7.266147688	7.242497252	7.308450158	7.197309202	7.313149256	7.279770969	7.238653333	7.29483251	7.292038448	7.27781013	7.300007516	7.316247952	7.276502159	7.232168791	7.262956157	7.35112809	7.217988404	7.28566913	7.265914847	7.248017605
ILMN_1651508	7.994462378	8.127756961	7.866356845	7.882221688	7.774086063	7.568417376	8.433678097	7.837266356	7.622645329	7.69548983	7.556896035	7.61574206	7.528784663	7.646143428	7.575990707	7.64574495	7.679312169	7.583696236	7.685246889	7.617059637	7.587361582
ILMN_1651513	10.27650629	8.184420197	8.090590131	11.54816472	7.223218897	9.637917853	7.271086886	8.927656919	8.647651677	8.024145611	8.493398993	8.578103617	8.754671017	8.530022371	8.859042823	9.2923826	8.938612072	8.719290076	9.047899344	8.939468169	8.984724295
ILMN_1651520	7.287163308	7.365529473	7.527852665	7.335082187	7.40330133	7.297102394	7.175523919	7.367669058	7.319929699	7.427382532	7.263434523	7.367966082	7.280473032	7.342074001	7.251801195	7.339513114	7.350754363	7.355415436	7.342351222	7.377208546	7.364282357
ILMN_1651532	7.274907699	7.322274232	7.375029507	7.278637545	7.178591148	7.284087794	7.212075085	7.250694326	7.300627877	7.263942099	7.226607455	7.365445339	7.265439755	7.220604365	7.244935412	7.336152569	7.227129646	7.234240973	7.313674897	7.290667557	7.30038932
ILMN_1651535	7.334356594	7.309789925	7.37656226	7.289426668	7.222017255	7.364177416	7.470721668	7.503134472	7.37437362	7.415637726	7.332104998	7.439858958	7.411737358	7.346366624	7.396915588	7.458659577	7.375572498	7.443697078	7.379472553	7.362285928	7.373295494
ILMN_1651536	12.12364255	7.564550416	13.61364898	12.38245266	10.23600242	10.76175526	12.80069514	12.19052917	12.70515546	12.37345197	12.56417263	12.86681325	12.86080171	12.76536823	12.84000684	13.32291305	12.58640191	12.71794304	12.85220193	12.164832	12.02289186
ILMN_1651538	9.686662301	11.50540243	11.06197852	9.915062017	11.70204503	7.847998722	11.87454344	8.007176535	7.946153764	8.079870349	7.741011407	7.724699057	7.722280259	7.68650853	7.900988865	7.939032644	7.883511023	7.781655466	7.862688509	7.721118235	7.783410774
ILMN_1651543	7.310699023	7.305380985	7.34387839	7.233555327	7.750710694	7.317302485	7.213256056	7.201120332	7.35060753	7.308164012	7.295673683	7.224966424	7.312126877	7.347010002	7.30297204	7.233258804	7.242146899	7.284791364	7.204089487	7.212004886	7.340522281
ILMN_1651544	8.429693105	7.235546211	7.327935084	7.647037635	7.195243132	10.23995146	7.207193443	9.517553838	10.0352607	9.281530751	9.829526251	9.361254413	10.04547121	10.09009979	9.907001631	9.666598966	9.740350346	10.01073044	9.981778773	10.57140437	10.62181705
ILMN_1651547	7.390635469	7.352244842	7.381840574	7.252850488	7.460915016	7.331307872	7.210693197	7.191143137	7.281397433	7.334648	7.393231143	7.317070038	7.305863488	7.404706455	7.324688771	7.405029032	7.212992193	7.260204001	7.446896729	7.847091556	8.079588389
ILMN_1651554	12.44388513	7.366509236	7.389796218	12.20587612	13.10580284	14.12185426	7.211377817	14.2233472	14.06633385	13.87130899	13.99272976	14.29782518	14.25440694	14.30698954	13.65297493	14.211395	14.21656362	14.34444465	14.35214479	14.29894795	14.09621698
ILMN_1651557	9.836894801	11.55307154	11.90743954	7.268113696	7.181699757	10.94133761	7.162087543	12.40541525	12.2503359	11.95951149	11.67934791	12.45917386	11.51103665	12.494847	12.49437698	12.38723403	12.15940414	12.17871549	12.3590555	11.99397689	11.91189943
ILMN_1651563	7.462023096	7.298963761	7.378358667	7.712080538	7.305642727	7.374082517	8.985921659	7.366201713	7.405111989	7.228789578	7.241667677	7.432765772	7.35655896	7.373031131	7.347129049	7.379587716	7.310610851	7.379464936	7.340788247	7.322003829	7.455436566
ILMN_1651565	7.40491543	8.133428707	8.229426967	7.573950366	7.955889935	7.372389524	7.21093112	7.467447513	7.316930071	7.370049233	7.376497511	7.444719818	7.4206718	7.481065677	7.402568723	7.396093768	7.426455199	7.399583807	7.365582779	7.374910381	7.38330604
ILMN_1651567	8.749334467	10.49300527	11.17037971	8.71969181	7.218046169	7.82704423	7.568979467	8.026056791	7.961191204	7.910698731	7.907905191	7.807861012	7.744669458	7.70918159	7.768753758	7.800562418	7.907697588	7.821753612	7.854580753	7.782371517	7.739892917
ILMN_1651568	12.16890937	13.72347718	13.55449795	12.64501724	7.225003212	11.31571764	7.233171896	13.09265735	8.582945946	12.1611894	11.0007282	12.45364718	11.30436222	10.62147291	8.518283945	9.85658583	12.01659499	8.225205621	9.069756752	8.376667839	10.17457033
ILMN_1651569	7.986859156	7.789018474	8.039755421	8.290161389	8.582459747	7.533849237	10.03211447	7.686159364	7.799255592	7.740198149	7.595842049	7.567633365	7.745646857	7.660342033	7.652072629	7.654288883	7.572909237	7.579461705	7.595627642	7.630135479	7.572253957
ILMN_1651574	9.962089265	9.029431303	8.392471096	9.802773284	10.28841562	9.000080494	7.200589009	7.684708226	7.860112766	7.704324569	7.659729824	7.846936363	8.134793279	7.782088009	7.732784964	8.026083395	7.839164563	8.075071012	7.836592827	7.940922121	8.096283827
ILMN_1651576	7.228534616	7.250658189	7.342098952	7.240730434	7.216792505	7.274492075	7.201712245	7.290646356	7.239053973	7.197739588	7.268685012	7.371147134	7.24289575	7.403696175	7.269580948	7.187029931	7.255335644	7.233347303	7.39757742	7.316769199	7.153649894
ILMN_1651582	7.402513908	8.03371136	7.362773099	7.452876397	8.586685674	7.377127858	8.042210915	7.325005063	7.441629119	7.464973692	7.353226031	7.446855313	7.375092879	7.395168886	7.490033389	7.52827145	7.398216953	7.453864698	7.399735835	7.433111612	7.411374229
ILMN_1651584	7.277309867	7.227543651	7.34154478	7.260107032	7.187916591	7.308219172	7.201135461	7.240255097	7.158205383	7.272622168	7.271675386	7.311250439	7.304732302	7.322875056	7.259187743	7.246505749	7.288979232	7.236452213	7.383684461	7.228538785	7.266739023
ILMN_1651597	11.1797723	7.279654574	7.084407954	11.99045274	7.216034973	11.03491317	7.178013267	11.22386338	10.929158	11.03394795	11.33181688	11.19178154	11.72284814	11.19524924	10.81985038	10.99676613	11.3366174	10.95140748	9.986552967	11.12178813	11.09107048
ILMN_1651599	8.276773631	7.299162021	7.334964875	11.98288852	7.365684111	7.52045477	7.236302042	9.060486531	8.43009103	10.1739909	9.078259986	10.2849095	7.358547267	7.467972871	9.443372386	9.730374658	9.970705138	9.568096495	10.37647804	8.344177064	7.99398514
ILMN_1651604	9.650853122	11.51476028	7.416477539	9.811786795	8.600963684	7.823809486	10.81171312	8.488352613	8.337797721	8.236716714	8.087618702	8.271159069	8.203492869	8.341319436	8.245820039	8.140886464	8.071166945	8.150701733	8.462785839	7.957921408	7.700940888
ILMN_1651606	7.267855645	7.314412212	7.282892423	7.301917638	7.338056998	7.299196034	7.206735998	7.304914474	7.301337698	7.327169771	7.349685788	7.274356009	7.333114025	7.379832942	7.310251415	7.264853465	7.28363211	7.308063335	7.24983549	7.253019401	7.236395856
ILMN_1651608	7.521716657	7.325325301	7.296714622	7.253878326	7.23575741	7.283193771	7.20635799	7.238753452	7.315874519	7.288847135	7.294510509	7.29317832	7.27096908	7.316896455	7.247186828	7.312333168	7.235408395	7.298427174	7.275541944	7.23144055	7.267324932
ILMN_1651609	12.64395911	12.5076128	12.9379203	12.04275982	7.944371165	9.539385866	8.762731567	10.70896868	7.514503497	12.07926771	9.077983738	9.561427723	9.596676492	10.15115824	8.660472718	10.93569486	8.823592273	9.88991194	9.387209585	8.019327612	8.422167149
ILMN_1651610	7.373705815	7.34913126	7.383214928	7.497366761	7.227224407	7.408910923	8.14256991	7.47235579	7.363878074	7.427050667	7.378890693	7.501679739	7.48100293	7.421709943	7.404113114	7.406855746	7.505774025	7.416280892	7.348720845	7.426537357	7.48080818
ILMN_1651617	7.270189091	7.293790324	7.219046011	7.239678058	7.202766112	7.294370562	7.201705855	7.279905954	7.267669788	7.157001012	7.291314852	7.339367247	7.213199866	7.269027584	7.195108012	7.288083327	7.356563128	7.293711767	7.230673769	7.240847243	7.257213631
ILMN_1651624	7.329790224	7.272335606	7.273505442	11.04249053	7.212275468	7.487202644	7.212770149	7.292525725	7.688105793	7.345476868	7.288046043	7.301336311	7.327078477	7.23265497	7.637988336	7.387147234	7.250369038	7.873026988	7.349754227	7.512375454	7.486684542
ILMN_1651628	12.3432145	11.47999041	11.82812898	12.68545504	11.52246234	11.70895363	11.85378225	13.54274436	13.38983168	13.6260383	13.07873616	13.49619568	12.75940684	13.20965177	12.91010207	13.43553966	12.77749687	13.53572924	13.37565693	12.15793497	12.10034024
ILMN_1651636	7.466783339	8.750870764	7.757764018	7.665791251	7.244186971	7.405329927	8.929294471	7.538465653	7.523812408	7.510038276	7.522222169	7.469874136	7.484038672	7.492814692	7.514306157	7.506476968	7.484990145	7.481683652	7.544946439	7.521312115	7.452672922
ILMN_1651637	7.297667354	7.283129561	7.320199727	7.340033154	7.221734169	7.292235448	7.204579583	7.298699663	7.2988541	7.236292374	7.296441654	7.174167482	7.309522438	7.390415061	7.352474438	7.360662412	7.292498221	7.428738404	7.36277331	7.283125275	7.373052706
ILMN_1651641	7.579090288	7.222553552	7.311739743	7.632317006	7.210312268	7.398536459	7.195075345	7.445274593	7.472666918	7.388424051	7.494276596	7.508319816	7.449138568	7.471207172	7.480238812	7.540120285	7.510251278	7.429083768	7.278188097	7.515296083	7.492667956
ILMN_1651642	11.35970274	8.883306927	12.06000357	11.74675147	7.430930337	9.132567007	7.209357883	9.823382432	10.18999396	10.09290774	9.614669101	10.66062547	9.927108346	9.63328196	9.77613199	9.686990919	10.05447691	9.382280568	10.13980505	9.583758686	9.112002284
ILMN_1651643	8.145595627	10.73266726	7.453213173	7.564534592	8.80212165	7.581614148	11.86105428	8.150684321	7.485257684	7.584114082	7.56672999	7.745100014	7.546106735	7.667928147	7.663156911	7.500798924	7.632391725	7.650654222	7.513988316	7.482251418	7.572470124
ILMN_1651652	7.210980386	7.234929335	7.257171157	7.23884503	7.225202321	8.26099066	7.207876392	8.777009586	8.295539091	9.070126848	9.197375045	7.312237663	8.768549031	7.233815432	8.775158587	7.254461986	9.095523468	8.531403009	8.97646637	9.406893708	9.593440868
ILMN_1651656	7.200992378	7.199653966	7.163483206	7.215149866	12.26608272	7.31876422	7.134228574	7.743070005	7.482631869	7.249893337	7.825973994	7.099301536	7.415937661	7.189134821	7.124606219	8.820394713	7.548618815	7.758579369	7.877275917	7.535357227	8.358569294
ILMN_1651657	13.24029332	7.368178019	12.93854701	13.02053497	7.226664426	10.9714361	7.214263953	12.90793216	11.37115493	12.65016751	13.62542156	12.42963497	13.90641363	13.66584315	12.95534254	14.17168545	12.14653737	12.82276927	12.47280684	10.78628999	11.49920021
ILMN_1651660	7.258580706	7.297751169	7.404862227	7.535703818	7.93686355	7.375760506	7.204791491	7.419443735	7.310023406	7.478262708	7.35660996	7.417857593	7.365752252	7.290149414	7.347186321	7.3741692	7.381243634	7.373487963	7.362745224	7.419998398	7.36976652
ILMN_1651662	7.217048533	7.294928391	7.192796516	7.277521375	7.172811599	7.245241502	7.183654363	7.218901796	7.312426694	7.294209991	7.203953485	7.276172149	7.271726015	7.257234904	7.299096965	7.351857969	7.245924309	7.316454261	7.252684301	7.173361841	7.261047686
ILMN_1651664	7.574664578	7.497137238	7.36040901	7.302946321	8.005419557	7.328653952	7.270898294	7.318288661	7.319680437	7.396133927	7.388745234	7.344660985	7.454333252	7.359847765	7.384029406	7.370114288	7.447115095	7.342576235	7.380623851	7.279205797	7.326110648
ILMN_1651672	7.737437283	7.287751578	7.388160429	7.362763832	8.399679537	7.315865062	7.3906092	7.309598062	7.356695673	7.488849794	7.371398367	7.376994255	7.454715325	7.326559653	7.369051153	7.365250216	7.378861045	7.336446818	7.346453266	7.232276407	7.333052066
ILMN_1651680	7.443107951	7.296143599	7.353184859	7.490568469	9.236716956	7.361410897	7.45224251	7.34565878	7.44426587	7.417375496	7.394468395	7.455580438	7.383997173	7.499332463	7.471281161	7.410330972	7.399857831	7.342266279	7.423664889	7.386745554	7.4025615
ILMN_1651681	7.822176729	7.324132696	7.473440428	7.545204877	7.265272328	8.155143784	7.202205014	8.631301832	8.646608161	8.601300379	8.162837763	9.31454649	7.838398754	9.210253967	8.108568349	9.533000966	8.519688115	8.412150639	8.031961636	8.776286966	8.683966869
ILMN_1651684	11.00302695	9.454047241	8.766711535	8.63887523	7.312156028	10.00185561	10.49791334	10.34815848	10.0390182	10.35939384	10.04894763	10.7210761	10.18999262	10.48957385	9.960624035	10.4343163	10.11624941	10.09264876	10.26338588	9.999323363	10.02814357
ILMN_1651685	10.01698325	7.721686236	7.375691395	7.540266108	8.248975436	7.546417838	7.197624237	8.045073145	9.296628391	10.00501329	9.365247847	9.859615157	8.275010406	9.459598775	9.627575957	7.356397791	8.868432755	8.385920351	8.851669947	8.320356488	9.422563783
ILMN_1651690	7.280385712	7.276407004	7.239594773	7.470235266	7.223679138	7.232729356	7.212390161	7.192145443	7.352308639	7.316782222	7.294647251	7.368684858	7.387940824	7.297104614	7.199762832	7.314046334	7.228176233	7.21205254	7.316729763	7.234852395	7.315275067
ILMN_1651692	11.855044	12.04581177	9.541496123	11.72208879	10.17133879	11.03009499	11.58413337	12.15698242	12.33295914	12.78042141	12.59135208	12.94283226	12.1056361	12.02287811	12.83138774	13.15505433	12.4062278	11.95613663	12.65471519	11.38948438	11.40065856
ILMN_1651693	7.678894903	7.435227867	7.503277508	7.50196851	8.036120937	7.659977052	7.537303652	7.567450557	7.529725247	7.565606862	7.481920837	7.487817795	7.46258783	7.507899116	7.438398772	7.433875843	7.466028867	7.483539774	7.469936827	7.534474453	7.497842815
ILMN_1651699	7.242260646	7.301627269	7.337134755	9.752057172	7.22858374	9.703221026	7.210696679	9.343571769	10.03554267	9.60786417	10.61591434	9.992420376	9.858059755	10.42953464	10.25714199	9.362111575	10.58396145	10.59337958	9.977026231	10.97743644	11.00262652
ILMN_1651705	12.84348506	7.310118651	12.70194884	12.79670597	7.235825953	12.38155485	12.38722627	12.74684037	12.95035513	12.73265336	12.23102965	12.57530009	12.36902795	12.93295158	12.63896018	12.24959797	12.93591101	13.0802488	12.53801872	12.59257506	12.53008072
ILMN_1651708	11.13248912	7.29801145	7.326657944	7.26417241	7.223890648	7.303412813	7.208541761	7.329374688	7.405240992	7.380576006	7.702656769	7.428290551	7.325069874	7.37497472	7.404892263	7.344466317	7.310363585	7.349850718	7.355814739	7.328744925	7.647978991
ILMN_1651710	12.23543041	12.792685	12.38726765	12.13678256	7.209544093	12.64424933	7.173578413	11.97167027	11.96293493	11.18777431	11.43801016	11.75104248	12.33742504	11.97684194	11.88287267	11.92343903	11.73072918	11.79529794	11.6381613	11.76112127	11.96305684
ILMN_1651711	7.362628394	7.290794497	7.346278668	7.472569367	7.211549884	7.44486936	7.813521024	7.418183038	7.52741632	7.404367754	7.47021338	7.443913906	7.359696823	7.560590732	7.43636658	7.424117041	7.500830069	7.395140987	7.388322513	7.469856807	7.479489431
ILMN_1651712	9.025939909	7.804156629	7.985443686	9.221906798	10.75425182	8.090030021	9.826660935	7.882166674	7.981443687	8.147448159	8.083250254	8.058893369	8.122561953	8.671757912	7.9470461	8.236825048	7.933411629	8.092048305	8.439646208	8.041565979	8.069990066
ILMN_1651715	7.604041097	11.50661422	7.327406123	9.381863561	7.218939997	8.245656785	7.198611912	8.139155999	8.478143149	7.847986331	8.181285638	8.399004642	8.619548041	8.162652079	8.417316873	8.927716665	8.073152645	8.099237862	8.104339441	8.635699635	8.740702544
ILMN_1651717	7.287703257	7.274034431	7.223113661	7.328904561	7.216328406	7.264441909	7.208872371	7.272662245	7.237793556	7.38374898	7.205548075	7.281108963	7.333229167	8.400396771	7.344569198	8.5035914	7.387689989	7.216717771	7.253197047	7.270323567	7.223707854
ILMN_1651719	13.92657801	14.29756446	14.17718527	14.17100938	14.07174732	13.0062011	14.22277431	13.58535654	13.46260295	13.69002588	13.43890745	13.413653	13.41491018	13.47829751	13.29198016	13.70477595	13.05909228	13.4659696	13.62281854	13.19227486	13.15097433
ILMN_1651727	7.225728078	7.276171362	7.173002807	7.26615493	7.226943636	7.269206583	7.205965819	7.387029553	7.399252315	7.171453646	7.215961243	7.332494951	7.305642569	7.305016245	7.402303794	7.351753154	7.276877792	7.30691123	7.281762436	7.326648356	7.273281957
ILMN_1651735	11.83262323	11.47969044	7.457637671	12.17946502	7.22328668	12.28347634	7.55650019	13.44123146	13.40044007	13.12474981	12.85366776	13.52689111	12.64794484	13.29951796	13.45826594	13.70752379	13.48347588	13.83188405	13.33285475	13.24380262	12.78538978
ILMN_1651737	7.349978579	7.267714845	7.343987274	7.304309319	7.200182475	7.267838823	7.193507557	7.25539792	7.207024682	7.2808172	7.267998643	7.253027133	7.276647686	7.302692126	7.328484625	7.156560364	7.307047804	7.198954728	7.331110691	7.260732885	7.324652504
ILMN_1651741	11.33454023	9.103578792	8.053763345	12.17124406	7.274666479	9.135321417	12.83590581	10.35098871	10.2676737	11.15586119	9.672670401	9.171020299	9.220086598	7.860454411	10.59902162	10.26795959	10.26224261	8.587805009	10.3480934	9.224409708	8.926223348
ILMN_1651745	11.70106569	7.301919576	7.34563798	7.716600627	7.284607232	7.485266956	7.211210562	7.395754999	7.46585599	7.518806828	12.23476708	7.475043185	7.491956641	7.571702346	7.536839308	7.560688004	7.465635121	7.42877389	7.411389607	7.456073083	7.455787174
ILMN_1651752	8.114092295	7.418128825	7.399140805	8.448759806	7.227760737	7.562674386	7.211759155	7.663037657	7.671139592	7.703427035	7.67839934	7.592883619	7.575248158	7.588481871	7.636713269	7.605896903	7.641482639	7.591953355	7.699007321	7.543410356	7.543839142
ILMN_1651758	7.29115406	7.293559864	7.289810423	7.225002878	7.224677645	7.315463194	7.226115193	7.285058515	7.350302781	7.318683256	7.300952317	7.37693162	7.296690604	7.287732766	7.277030556	7.368257075	7.275039147	7.305287373	7.366642383	7.335569769	7.340565666
ILMN_1651760	7.348327116	7.294614211	7.354330901	7.608390105	7.339942604	7.344592454	7.207878662	7.322067527	7.390960221	7.394572508	7.283983812	7.466518004	7.384462112	7.420608263	7.394440461	7.316435562	7.384966483	7.338567808	7.429858302	7.339418229	7.377458232
ILMN_1651763	7.695040127	8.235709097	8.740161468	7.571718587	9.066812743	7.362763074	11.3586559	7.47013692	7.454547477	7.417177506	7.408910734	7.418986518	7.488976754	7.405823039	7.440113858	7.3327772	8.02349056	7.386502558	7.495886137	7.641631393	7.407159232
ILMN_1651767	11.81163473	7.244517094	7.248979993	11.86176964	7.123693237	10.42846412	7.197243314	10.93985692	11.80449784	12.68079448	11.88211028	11.72349048	11.46163546	10.58227483	11.8374686	12.0252771	11.53810955	11.2571919	11.02347846	10.7932111	10.26010862
ILMN_1651769	7.254916556	7.331567835	7.355221754	11.44329211	7.218299606	11.38134736	7.595088744	10.96093904	11.07883854	10.57129674	10.95780939	10.84956016	11.7648166	11.26868388	10.83799195	11.45704935	11.15704838	11.09894135	11.39782434	11.85063493	12.18312714
ILMN_1651771	9.696609047	7.287722605	7.341587354	7.243703316	7.585625577	8.617995776	7.215907566	9.295026738	9.568672881	8.234672444	8.603407311	9.786538512	9.288275629	9.317673832	9.012848927	9.567728237	9.501088075	9.393930475	8.704121075	9.233528539	9.051483471
ILMN_1651776	11.9837142	11.85691397	11.91671802	12.1477128	7.224314736	11.12976444	12.50645838	10.47777418	10.33841639	11.12611906	10.69851311	10.78023757	10.56624381	10.66175486	10.42341193	10.55499892	10.44466341	10.80800666	10.54169127	10.4532321	10.411979
ILMN_1651787	11.88315771	10.55112265	12.74557906	8.361835275	9.046645475	11.81263472	11.43727135	12.3059769	12.82948837	12.34865514	12.42543008	13.08863646	12.72890037	12.25459713	12.9183519	12.49512659	12.56266919	12.87210889	12.50462821	12.45842647	12.26945586
ILMN_1651788	11.50816258	12.11975776	12.86724909	7.29240502	7.205592444	12.61769482	7.20505823	12.20703323	11.86229607	12.5993838	11.65648212	12.30131561	11.37002072	11.42268643	11.50973051	12.28788541	11.99151449	11.96757758	12.08871387	11.43076111	11.46391927
ILMN_1651789	7.303788393	7.292575274	7.34137798	7.342734137	7.206237105	7.328132186	7.936479548	7.434663119	7.425585537	7.367452801	7.413354503	7.515223223	7.459313722	7.488338291	7.399595269	7.490956206	7.374983907	7.417131582	7.420717956	7.343689075	7.511554403
ILMN_1651792	12.75826234	12.06827094	12.35443488	12.65415422	7.218989601	11.95044465	7.213598355	12.41108346	12.43951858	12.6927124	11.79045839	12.78375725	12.08104818	12.04718015	12.08682543	11.22400231	12.37910975	12.60599454	10.68230825	11.68042079	12.03166623
ILMN_1651799	12.41554634	11.83368548	7.279764175	12.30582624	12.44345254	14.31705528	7.186684726	12.9887506	13.3466494	12.30609851	13.77385305	12.44657306	13.9390421	12.75322282	13.44313778	12.80976622	13.30596376	13.21785818	12.85976957	14.26467993	14.4827703
ILMN_1651800	12.01148739	7.271990094	12.70564748	12.28517115	7.161428846	12.73328731	13.02624371	12.51635289	12.52309548	12.23186587	11.54516728	12.69915666	13.15535002	12.39625281	12.95739749	11.19181401	11.68055164	12.67664331	12.28106716	13.07453314	12.93668408
ILMN_1651806	7.323686538	7.487727422	7.452888994	7.370532097	7.218123421	7.361269297	7.21291398	7.436633887	7.329632922	7.437589004	7.331874422	7.371121346	7.365200856	7.341574053	7.330091627	7.203687891	7.312812367	7.287319239	7.326956107	7.302437832	7.270615452
ILMN_1651811	10.18702444	11.51987583	11.80827968	10.82514677	11.56144456	8.018873105	10.97403759	8.39355529	8.369646698	8.366592769	8.190961207	8.086561697	8.299603751	8.221005946	8.208996729	8.213191938	8.170922541	8.126336487	8.197575074	7.987226992	7.952480353
ILMN_1651817	7.385195431	11.45763817	7.236735372	7.317241925	7.234050507	8.988318713	7.21874941	8.251616804	8.156856425	7.740023539	8.595923995	9.052165337	8.861339437	7.611852302	8.753870697	8.972750716	8.552917233	7.908117371	8.000909056	8.859660609	9.098703205
ILMN_1651819	14.92276547	14.66219611	14.99455962	15.55660438	14.21995663	13.63057327	14.06048052	14.32562522	14.49287114	14.4076223	13.78059876	14.58769338	13.98976028	14.52045254	14.21402559	14.00691113	14.35652724	14.1361464	14.24150391	13.80853493	13.61093254
ILMN_1651826	7.688777721	7.304214884	7.655147531	7.542413168	7.857892093	12.07871319	7.220750964	11.40779276	11.12092674	11.06832087	12.01655121	10.67065965	11.85669407	11.43960264	11.86041522	12.77107158	12.35581336	11.3730481	12.37627168	12.32855943	11.83161852
ILMN_1651828	11.57731074	11.67780344	12.06925182	11.80031974	10.98202866	10.92706707	11.47455691	10.35063015	10.20166348	10.80645886	9.921674618	10.43280836	10.06673655	10.10910395	10.13628395	10.2307046	10.03793638	9.985251521	9.788444525	10.45220995	10.36104014
ILMN_1651832	14.03893825	13.85760613	13.06407728	13.95654592	13.36456232	15.02308605	13.70305456	13.72721711	13.86324486	13.52942207	14.18167502	13.91126969	14.33426748	13.78387254	13.66017054	13.89735133	13.64105828	13.86893904	13.56280938	14.27134576	14.62468195
ILMN_1651838	7.220917483	7.259031321	7.096292813	11.79360143	7.186456676	8.690489948	7.196100974	7.13706904	7.205164501	7.179617288	7.172222896	7.209506922	7.65178197	7.215331496	7.235843915	7.234647569	7.212690156	7.273479904	8.432350316	7.271690272	7.182198877
ILMN_1651846	7.228672746	7.28084427	7.262593482	7.223912935	7.209805035	7.304760484	7.200172982	7.227303204	7.355885095	7.265267153	7.25905055	7.276681166	7.182520443	7.079338344	7.306440568	7.31489337	7.277943481	7.224729062	7.217226678	7.268047953	7.246090568
ILMN_1651848	7.25784961	7.293896542	12.52945042	7.399669324	7.203014026	10.87499582	7.205769637	10.14598447	7.563419274	7.454915599	10.33173533	7.488136177	10.59884244	11.51469567	8.779691288	9.265942463	10.69202335	10.09863009	10.08864675	10.9991875	10.23024426
ILMN_1651850	14.19853979	12.82708877	12.22552379	13.27992273	13.6799388	15.04505419	12.49292669	14.75193967	14.70129747	14.60670775	14.83559345	14.33109411	14.92235665	14.72455132	15.16227081	14.76510829	14.74619658	14.85759696	14.91516243	14.99313514	14.8852849
ILMN_1651865	7.261270282	7.194571102	7.229895567	7.267038341	7.193692899	7.334407654	7.200393671	7.337559966	7.429118308	7.33954927	7.27547396	7.427038896	7.338037361	7.214425909	7.373147478	7.282064483	7.295556729	7.3473829	7.278172435	7.398065024	7.374236434
ILMN_1651872	11.94756923	7.284980924	7.355792602	11.8154513	7.323284549	12.1328189	7.197823071	10.85145425	10.78118385	10.93715444	10.78533976	10.77954682	11.09840565	10.546574	11.45722688	11.44567578	11.39150201	11.22006382	10.49158711	11.3839292	11.52503041
ILMN_1651878	12.85922158	12.51465328	12.71214469	12.43751633	12.81736435	12.17200053	7.217688652	12.71347689	12.95142963	13.19103755	12.93510029	13.15989093	12.57450894	13.15182462	12.79830386	13.29909791	12.89535889	13.04500017	13.24431703	12.84685137	12.63100865
ILMN_1651886	10.45860841	7.258063052	7.523304758	7.279450857	7.284478733	12.42004595	7.225893258	11.78576865	11.09281103	10.06643344	11.65848212	11.01606949	11.59677845	11.23180553	11.67614032	10.8340279	11.33816464	11.51896703	10.67967205	12.4607664	12.9376949
ILMN_1651899	8.068359346	7.372522473	8.443789562	8.266176025	7.301157675	8.186561362	7.22144632	7.898789357	8.099783045	8.192152523	7.958314276	7.993053953	7.982490033	8.137947452	8.303738993	8.209943328	8.268922081	8.284362466	8.216895321	7.985073422	8.033258619
ILMN_1651900	10.13470269	7.277548518	7.286848708	11.43641616	7.214876637	7.357362856	7.435842277	7.317711414	7.404973104	7.319900962	7.83216445	8.930653533	7.50787509	7.307293244	7.28258173	8.464414557	7.433448703	8.436643077	8.068537589	7.517889395	7.567582674
ILMN_1651902	13.6028609	12.38172432	13.63296223	13.52761644	13.22833196	13.29748672	13.02723408	13.93819477	14.0349898	14.34248071	13.98278776	14.1188078	13.87670043	14.00673196	13.78551352	13.81809653	14.00174907	13.91219687	14.27774102	13.70477474	13.62343625
ILMN_1651903	7.48719865	7.26772544	7.349354388	7.351954628	7.267288596	7.347476501	7.16338479	7.444897395	7.339721803	7.462961939	7.360821097	7.467041554	7.42467364	7.394502679	7.367232922	7.407323931	7.40127425	7.364063767	7.401189017	7.342713152	7.350144082
ILMN_1651905	7.296106285	7.319315357	7.252888115	7.435719375	7.369372115	8.849128158	7.24970938	7.874826771	8.489170649	7.29644643	8.115316322	7.303758591	8.008933185	9.015531611	8.21579224	9.088569466	8.236645041	8.172680607	8.735213023	8.819761495	8.808773195
ILMN_1651913	7.365332965	7.297006939	7.393650538	7.395891872	7.556243221	7.295818368	8.595330849	7.426566059	7.32016086	7.368926449	7.405953976	7.467107659	7.466680024	7.362311426	7.485703349	7.444328119	7.398665147	7.431130608	7.501280379	7.305598108	7.355056753
ILMN_1651916	7.730231471	7.953203395	7.399349911	7.642966962	8.443190847	7.685800613	7.288912006	7.500710898	7.735068023	7.472891299	7.701318859	7.509569684	7.559721745	7.720632437	7.770618447	7.55465428	7.709083299	7.677672379	7.813336521	7.661271961	7.775109912
ILMN_1651936	14.07359879	13.96653786	14.08090383	13.89386005	13.73915513	11.76843194	7.254061803	13.4986008	13.5776931	13.75365852	13.10909035	13.45373107	13.1532719	13.24472036	13.24280561	13.65787221	13.13584724	13.16171049	13.63987541	12.72421091	11.99228776
ILMN_1651938	7.365751876	7.623537191	7.352683145	7.683696438	7.202493067	7.466854735	7.214991751	7.419156573	7.381899982	7.416189889	7.462963772	7.478993395	7.497515454	7.525117558	7.480066469	7.482498133	7.463936548	7.458400624	7.450336722	7.416121413	7.471933804
ILMN_1651940	7.230998617	7.164322669	7.18440888	7.226347332	7.188012751	7.295073697	7.167347133	7.237421998	7.182013874	7.234648797	7.18479651	7.18170903	7.230432963	7.229280753	7.181863836	7.206660095	7.244477412	7.232921477	7.195590017	7.359269962	7.177098966
ILMN_1651943	7.919800912	7.371030845	9.241048928	8.291890771	9.991909479	7.780269796	7.394168918	7.653183495	7.594070381	7.71889789	7.564417389	7.647297074	7.593875855	7.60307717	7.541435391	7.591437434	7.556430869	7.559772076	7.580707484	7.592749976	7.570903817
ILMN_1651944	7.416910833	7.24343081	7.338844359	7.537238838	7.275163307	7.359343234	7.205872355	7.392426372	7.389488599	7.421944722	7.376536744	7.48035298	7.310230219	7.453672313	7.339309238	7.405252552	7.37899484	7.346617174	7.353570759	7.341238243	7.532590939
ILMN_1651949	12.41231115	12.35670888	11.94983528	12.10552294	12.99467065	10.45014374	10.67432373	9.820850413	9.87058004	10.73224071	10.48814994	10.34132893	10.30836529	10.26509218	10.15216582	10.05362199	10.0921433	9.842671713	9.425747705	10.18006003	9.955855561
ILMN_1651950	7.241616869	7.260923757	7.281629418	7.24503552	7.211528106	7.66510308	7.192901137	7.236075476	7.27016807	7.258780904	7.214105573	7.47659063	7.690754716	7.252447196	7.217692311	7.250283243	7.357905558	7.205855952	7.22762869	7.575160212	7.339686797
ILMN_1651958	14.540677	13.43847761	14.26733535	14.52311557	9.13971105	14.58736413	13.89925719	15.00120807	14.95793872	14.97217046	14.66992779	14.98007931	15.14762593	14.93409522	15.04029318	14.7883092	14.78841369	15.02465756	15.12157132	14.82420285	14.9692721
ILMN_1651964	7.212383213	7.280221036	7.285493121	7.312767831	12.23884734	11.57600338	7.214863593	9.991495539	9.36588704	9.887030561	10.41271586	10.0449538	10.8297021	10.73439149	10.29874049	9.296623028	10.30332859	9.82232912	10.24184323	11.41729792	11.94583903
ILMN_1651966	12.68902583	13.07080078	12.87712287	12.73216383	12.31934087	11.82030676	12.54986951	11.58585428	12.36170365	11.99486648	11.41224518	11.85704133	11.59130241	11.89963231	11.30125915	11.48098833	11.76540891	11.81855031	11.41472189	11.27396548	11.69816391
ILMN_1651967	13.36688747	13.83797119	12.98344371	13.23404957	13.85364843	10.99741191	13.02332	11.6005568	12.68543129	12.44646756	11.86642108	12.020828	12.31965117	11.62148748	11.81856943	12.30853815	12.16024011	12.19110541	11.86756202	11.54092143	11.52684375
ILMN_1651980	8.016031379	10.52232342	8.368721708	7.952560276	11.1040373	7.649699817	10.75479208	7.66551491	7.657722904	7.748034015	7.613623839	7.653288361	7.546745362	7.575418992	7.656885928	7.590973309	7.645644975	7.584179386	7.683018923	7.528291224	7.578798057
ILMN_1651984	7.628973632	7.557053969	7.341485273	7.92902193	7.225064491	7.587242213	8.911847093	7.453209284	7.448712234	7.418814798	7.411810024	7.57619152	7.503440434	7.691468926	7.500975862	7.554434861	7.465054577	7.448529366	7.675823578	7.462642772	7.462024689
ILMN_1651987	7.559053103	7.293141237	7.354796728	7.711473384	7.887707794	9.12223452	7.210334268	8.817410882	9.86356131	9.203033565	10.26992721	8.59598629	8.797143143	10.38921002	9.973721327	10.49490915	9.828534051	8.658470619	9.874608543	9.181349773	9.814040141
ILMN_1652000	7.379762809	7.63528668	7.934709251	7.375568734	7.689564026	7.358968222	8.514147436	7.407211174	7.411919861	7.40272753	7.415984224	7.432365194	7.349232864	7.455883184	7.425135315	7.537086352	7.477831271	7.375931262	7.517932149	7.414733042	7.413847324
ILMN_1652003	7.360837022	7.28305751	7.241503267	7.278081954	7.550209593	7.47155798	7.204351251	7.393016669	7.318560939	7.434209086	7.411490424	7.405905215	7.456549496	7.538693583	7.434034168	7.470716629	7.430626925	7.405914804	7.462843225	7.400685505	7.563300377
ILMN_1652006	12.16027052	9.369268323	12.60509484	12.47936897	7.223709041	12.4533661	7.274858412	12.51020063	12.68638526	12.60984412	12.41844735	12.64547431	12.63409226	12.41302794	12.1950502	12.79210858	12.26295853	12.29291783	11.90376124	11.99921135	12.24830342
ILMN_1652008	7.7293579	8.609660101	7.501644078	7.567953057	7.619691545	10.20512902	9.869741255	9.906503685	8.964662512	10.28824145	10.07125894	8.987070738	9.120883699	8.865747814	9.47030696	9.601024439	9.645667741	9.41790952	10.23225941	9.862428575	10.14236197
ILMN_1652015	7.601887436	7.262060451	7.367500355	7.510033534	7.220116682	7.494780302	7.202545625	7.461467042	7.438151479	7.421359388	7.425686393	7.48612357	7.394649893	7.490686246	7.518546302	7.499319189	7.573585287	7.447681111	7.47039661	7.493259699	7.446854137
ILMN_1652017	7.202390837	7.230382504	7.113508493	7.224641466	7.161077337	8.110493081	7.172978176	9.212464168	7.263504863	10.0938986	7.242085105	9.343088871	7.287821738	7.284255893	7.21175161	7.317749254	7.226511526	7.288622805	7.231291833	7.715837922	8.22398884
ILMN_1652022	11.76115088	11.23191498	11.81989083	11.61148313	11.5466481	11.23632876	12.53600254	10.70775583	10.80519797	10.99437409	11.22665079	11.08578031	11.26286122	11.66991948	10.94932632	10.35836443	10.71519184	10.31274748	10.36826461	11.00535965	10.78803032
ILMN_1652023	11.91385545	11.69480377	12.49333662	7.272544608	7.223628851	9.812486655	7.209244907	10.767545	11.50420015	11.32960067	11.53448134	12.00569832	11.32198943	9.873431018	10.50345197	11.26102314	10.58677743	10.4878864	10.87062854	10.3739569	10.49666323
ILMN_1652024	7.203307116	7.257377404	7.276157315	7.228267358	7.213899809	10.20276194	7.199955136	10.88839284	9.996689971	9.778380135	10.95024003	9.746696177	10.7198271	8.795642441	10.76631647	10.51140263	10.94624922	10.67172617	10.06993147	11.32785183	11.62512771
ILMN_1652037	11.46471738	13.64182858	12.66214648	12.09945558	13.35019697	9.827024556	12.44776148	9.646737241	10.76159988	7.328789225	9.637409012	10.08589086	9.032996085	9.773839264	8.844967474	8.680348739	10.08542987	11.3750964	7.317972746	9.821036675	10.43472182
ILMN_1652056	7.284867912	7.241113684	7.329362029	7.240987048	7.201465918	9.008130448	7.177370008	14.43491838	8.468742718	7.268226827	9.981650259	8.780873256	9.131656863	8.360731874	8.933032812	7.242978217	9.225711366	9.029364503	9.220343359	8.464434413	10.80954238
ILMN_1652065	12.52668882	7.244680004	12.56981683	12.24525001	7.212933681	11.72021968	7.171469227	12.05326686	11.61424603	12.05115191	11.37536337	11.57050373	11.34310735	10.75669062	12.19991054	10.25808706	11.37608545	11.00591114	11.66535572	10.9154728	10.97223869
ILMN_1652066	7.222099575	7.242939901	7.348294858	7.234619464	7.181674488	7.27509364	7.168853467	7.309043841	7.29513817	7.350225997	7.219353905	7.324785195	7.196603033	7.336509381	7.293777442	7.247262088	7.244303847	7.278045164	7.277979475	7.278397988	7.208164771
ILMN_1652072	7.259579199	7.329798403	7.258332222	7.446463403	7.226690667	8.027230227	7.24134406	8.024659649	7.346571656	8.845998768	8.68531828	7.261303187	7.59495234	8.155513826	8.324312051	8.986711251	7.392017755	9.060684924	8.21296647	8.152552228	8.226598178
ILMN_1652073	7.213788668	7.284075899	7.337809794	7.318984471	7.222613474	7.274236877	7.243226987	7.234572658	7.3661731	7.318834084	7.359324467	7.409567563	7.224620653	7.278514028	7.268354632	7.302419887	7.323717642	7.33493639	7.31793285	7.32916758	7.32896801
ILMN_1652079	7.280204629	7.258747874	7.329992992	7.259861518	7.197353436	7.305975406	7.213203762	7.234045318	7.242430673	7.445143905	7.19847572	7.272504212	7.277644743	7.287103691	7.252726535	7.317357595	7.239950382	7.234497334	7.292258784	7.203089381	7.318790413
ILMN_1652081	7.281981167	7.283813038	7.285563479	7.373386536	7.225861809	7.310279182	7.212777259	7.306402282	7.353285278	7.316906659	7.340511248	7.31173412	7.363771638	7.286488015	7.355126988	7.340063725	7.427811566	7.347275792	7.27893958	7.322794614	7.361187857
ILMN_1652082	9.307969344	8.995188509	7.334896428	11.44252329	7.224118924	10.5774733	7.219641682	10.14953494	10.4921915	11.32253406	10.37871643	10.52804951	10.4232782	9.443648788	10.45338942	10.27051617	10.19235557	9.805667393	10.47340278	9.852118836	9.918195222
ILMN_1652085	13.19684635	7.289448039	13.3041673	13.14000789	13.25888423	13.94192954	7.213316539	13.67476011	13.56029829	13.44837617	13.57895473	13.49297565	13.89998156	13.41440556	13.5928181	13.58238142	13.46280454	13.48918086	13.65764852	13.71856994	13.4123654
ILMN_1652088	7.215722156	7.284621023	7.247484933	7.290024803	7.223789092	7.212229231	7.217382595	7.228405103	7.215671364	7.209870813	7.271382996	7.538319556	7.295458132	7.197035908	7.269441576	7.756962665	7.226135679	7.212929093	7.257396265	7.364624438	7.183498824
ILMN_1652098	7.208015923	7.265898532	7.256793008	7.254149369	7.211963516	7.285077698	7.195496299	7.339567383	7.272113459	7.272245073	7.272935986	7.25185506	7.243015674	7.217530667	7.253873749	7.345858429	7.197166692	7.201269612	7.205223847	7.21537192	7.286144002
ILMN_1652104	7.281563946	7.320679245	7.239488504	7.223266383	8.589342145	7.336835477	7.177575185	7.347221345	7.324213841	7.358865065	7.260680294	7.347503627	7.243236013	7.317604706	7.33235416	7.366440118	7.354515394	7.248217152	7.212743165	7.255842931	7.271542963
ILMN_1652110	7.693507754	7.296208677	7.368388365	7.274361725	7.199917183	7.442539042	7.318182553	7.356234346	7.377786671	7.477734765	7.355681273	7.293604086	7.503263735	7.50706549	7.517996615	7.312163969	7.361965232	7.412948663	7.504507507	7.34812538	7.437831059
ILMN_1652113	7.720455173	8.007440015	7.588887382	7.583025224	7.225647	7.535607704	8.164586545	7.588035742	7.531777826	7.473148001	7.49595928	7.530202194	7.417877897	7.563144764	7.563275055	7.613229888	7.524596503	7.430195116	7.524985984	7.534052206	7.567214675
ILMN_1652123	9.410722722	8.938663641	8.368905908	9.272427808	7.51449171	8.165882683	7.374538639	8.255027304	8.344420926	8.250454842	8.094857077	8.054334382	8.023821779	8.292285737	8.19925049	8.157785711	8.136064243	7.902285755	7.953318425	8.150305141	7.99473712
ILMN_1652128	11.72217181	8.26861711	12.26250404	12.17362567	11.12094497	11.53762512	7.695586409	10.71102918	10.15543169	10.36234949	10.28049304	10.53757369	10.7249658	10.82530481	10.32885632	10.57922337	10.91010905	10.61419423	10.55680995	10.9563438	10.87322915
ILMN_1652132	7.378083155	7.29670165	8.157033355	7.523462274	7.277428498	7.520065151	7.920116233	7.482992415	7.502674948	7.449556726	7.471264476	7.549308137	7.519717288	7.421097272	7.497810486	7.424194866	7.584115453	7.380382172	7.576643678	7.507811664	7.496714277
ILMN_1652137	7.202346753	12.19345905	7.337235726	7.228125473	7.194201254	7.222271014	7.180704855	7.301011789	7.196411405	7.270170262	8.599955091	8.873314662	8.789882873	7.144184199	8.29630553	9.5545771	7.214422143	8.089492209	8.715167758	7.228991053	7.676496058
ILMN_1652144	8.411435699	7.334857186	7.539234024	8.601794236	7.226140807	7.80069119	7.213596059	8.030126943	7.989831738	8.126725386	8.02560999	7.862153856	7.77935649	7.953103785	7.886437751	8.058330072	7.981370009	7.757007236	7.884989875	7.811353823	7.802390135
ILMN_1652147	10.24379619	11.47784083	7.340468714	9.986126555	7.221423237	8.670652464	12.07969187	9.008189455	8.55866643	8.30711645	9.029162803	8.918636166	9.259235283	8.803128892	8.839104521	9.204998984	8.723297602	8.970974971	7.996493296	8.886278157	8.577553193
ILMN_1652151	7.389225788	8.068853067	7.351549471	7.329944907	7.225300993	7.450072188	7.209472303	7.484910906	7.433152931	7.460752548	7.538442662	7.420975919	7.476119782	7.580583947	7.550147947	7.446477755	7.521856276	7.447473722	7.44186383	7.497001469	7.443586149
ILMN_1652155	7.215603767	7.284559543	7.238345332	7.251176667	7.224213402	7.244660954	7.198602532	7.206921455	7.248240973	7.258870102	7.197923216	7.195865379	7.24718058	7.386036769	7.276068448	7.21244865	7.244226499	7.294449413	7.288038055	7.28870757	7.180706336
ILMN_1652160	8.433758787	8.44714669	8.576414882	8.18539883	8.688124536	9.298501543	7.210789011	9.263443209	9.16385197	8.938011306	8.543949313	8.811528181	8.932887591	9.172500939	9.269729236	9.574989651	9.199736653	9.382519923	9.045098826	9.541961672	9.239656114
ILMN_1652161	15.21408574	15.14799947	15.4731869	15.20343022	14.50987808	13.72739912	14.80720214	14.66428032	14.58914038	14.94437283	14.55569638	14.89103711	13.91144941	14.38178362	14.53679148	14.38157512	14.22867768	14.60448594	14.58692181	14.00919987	14.15413381
ILMN_1652163	11.5362134	11.62625826	7.290895422	11.7576941	7.218432101	11.0087061	7.207745995	11.88306747	12.08968147	12.08027785	11.06070244	11.65623446	11.3336595	11.52984289	11.62079123	12.02023244	11.69137633	11.45632671	11.47383454	11.00192928	10.71481499
ILMN_1652164	7.973860516	9.234519847	8.805613267	8.001536446	8.089564253	7.53860067	9.653765512	7.611169301	7.648919055	7.592760154	7.510807023	7.654092235	7.569566484	7.62250882	7.626199566	7.582706011	7.550406459	7.468418736	7.527663665	7.521832453	7.541235708
ILMN_1652166	7.338759097	7.240643181	7.338781642	11.8332554	7.225911297	10.05622983	7.212917021	7.789841217	9.027519456	7.322521281	10.54383638	10.98778714	11.47218102	7.246578585	7.498302864	11.62255415	7.375709183	8.27643916	11.46639646	12.42387642	10.52102186
ILMN_1652170	7.665126808	7.674915601	7.338734005	7.311353496	7.285119049	7.506094551	11.50774622	9.426967603	7.482982112	7.51497336	7.549459701	7.501051216	8.078727719	7.523306842	7.508277101	7.515658723	7.496552674	7.40773049	7.49309072	7.557605545	7.535451553
ILMN_1652171	11.94493923	13.28078476	7.269055895	11.90520672	13.84422467	8.503745139	13.53809406	9.537756392	9.497712064	11.67965138	9.86564723	7.286968421	8.780374121	7.229611649	7.322374645	7.251494529	9.325942409	7.335713369	9.223355065	8.988069167	8.893073719
ILMN_1652175	7.243831425	7.225804292	7.312448961	7.226733155	7.217248128	7.267699936	7.212346771	7.318810104	7.290363507	7.254335067	7.176942445	7.198632108	7.279253467	7.201591368	7.273132361	7.296771784	7.292045702	7.232394724	7.171258863	7.231604022	7.244854037
ILMN_1652178	7.488537098	7.286694943	7.363197027	7.411654853	12.61479921	7.574984361	7.199309974	7.511398843	7.488611893	7.376560313	7.426504012	8.106753185	7.517851082	7.446463388	7.500891994	7.451491866	7.463839546	7.464831414	7.466478228	7.396065587	7.402440454
ILMN_1652181	7.284638844	7.280981981	7.33743137	7.397221351	7.233155095	7.428627702	7.20703761	7.354796233	7.341534784	7.477569794	7.600205285	7.379296177	7.314201482	7.388940661	7.421127071	7.478845801	7.337711965	7.378028833	7.250950648	7.315952647	7.334857535
ILMN_1652185	11.42668055	7.294837567	7.325510251	11.79907449	7.204043169	12.36561903	7.208450771	11.88616871	11.55058151	11.96176528	12.31386067	11.29771975	11.41678256	11.11959903	11.5013476	11.85588463	11.59459805	11.27430651	12.05699196	11.20665356	11.1254103
ILMN_1652188	8.150599416	7.294874463	7.265507321	9.833003706	7.207876698	9.606043735	7.323947066	9.34444948	9.226698218	9.725723254	9.445968913	10.07138868	9.607593019	9.523875698	9.618538416	9.86691217	9.501052409	9.652122993	9.432532016	9.805855138	10.14221976
ILMN_1652196	7.350536131	7.291705685	7.191076609	7.233872088	7.340712899	7.380073227	7.211308474	7.389828278	7.351918211	7.295094684	7.43897217	7.345086826	7.466450419	7.447916587	7.482184392	7.401390106	7.339083912	7.51418232	7.4459818	7.453377887	7.619837323
ILMN_1652198	7.429910222	7.305084647	7.313204816	7.433737995	7.356792175	9.099757761	7.259264195	10.47834314	9.902443836	9.509679238	10.8034428	10.14627163	10.22103238	9.704705778	10.38454153	10.32658785	10.63222024	10.00930038	10.73030433	10.15683377	10.5411635
ILMN_1652199	7.434109868	7.296951126	7.30112112	7.561055747	7.218702866	7.359884236	7.331747037	7.309418939	7.421045968	7.502067068	7.34652428	7.373700409	7.466541746	7.385757102	7.458346091	7.510085555	7.444852386	7.390924205	7.448773442	7.452735976	7.397531267
ILMN_1652205	7.575088177	7.309125253	9.041446141	7.364989373	7.222181911	7.577406034	7.21490559	7.65706388	7.781690998	7.677716334	7.580033554	7.714113634	7.511440807	7.552738903	7.451656372	7.615016323	7.693729387	7.55969345	7.659365167	7.589516043	7.584044001
ILMN_1652206	7.221022411	7.26345367	7.29775231	7.238063951	7.222668375	7.427956493	7.206378621	7.398240272	7.419228269	7.25571478	7.47697574	7.437265675	7.432651963	7.335116074	7.341304461	7.446999565	7.418007508	7.306397733	7.440966051	7.444467861	7.383263117
ILMN_1652207	13.5715221	13.004833	12.0867182	13.14025259	13.48690135	15.09765266	13.18977471	14.96535796	15.01793118	14.58818885	15.00710716	14.79470213	15.10380427	15.07118358	15.04855249	14.95638667	15.07864303	15.04115783	15.11522086	15.2696897	15.18918044
ILMN_1652209	7.222039086	7.263351372	7.342241688	7.226141851	7.200623437	7.335022739	7.196875923	7.381990057	7.282935514	7.278610264	7.245959795	7.238064118	7.288857695	7.251750807	7.213357357	7.28954651	7.303858604	7.277337358	7.242201745	7.284730937	7.275060286
ILMN_1652215	7.484079117	7.616443577	7.434033318	7.828193661	9.906427728	7.561511138	8.625192024	7.610143547	7.446734285	7.604682188	7.532979995	7.511658053	7.573093199	7.522300722	7.562530663	7.570531602	7.56494514	7.55121741	7.592474162	7.508993499	7.547743943
ILMN_1652218	7.412172502	7.343985163	7.35986609	7.301538021	7.217964098	7.297568192	7.244374574	7.239405795	7.364401528	7.307317988	7.23379852	7.322440314	7.26617543	7.205999156	7.35686517	7.316317602	7.347449774	7.286191101	7.354624635	7.257341095	7.269802756
ILMN_1652219	8.363227041	7.328590125	7.368315823	8.61233764	11.71010498	7.933905593	7.416732922	8.336415971	8.371428746	8.533936163	8.048754135	8.502996779	7.89038521	8.147476508	7.975227923	8.19105159	7.768808048	7.802880364	8.162610049	7.612787502	7.610037762
ILMN_1652223	13.10557521	7.285413194	7.381957708	12.10811915	13.06173009	13.30846062	7.284247489	12.42753653	12.00079762	12.40716012	12.80318867	12.94958663	13.28721488	12.68238373	11.79060593	12.97524126	12.59935418	12.84721479	13.11911343	12.67952068	12.79192606
ILMN_1652230	12.25652036	12.13876313	12.16540262	12.69992795	11.97777448	13.05672128	12.29800609	12.01439597	12.14778147	11.92093685	12.56639282	12.06698461	12.31621599	12.53435385	12.88420395	12.09179185	13.23985315	12.75183224	12.86898133	12.59167201	12.72060175
ILMN_1652236	7.23893414	7.30457736	7.386947707	7.325126934	7.223618371	7.33497385	7.450627775	7.328588824	7.309857232	7.342310075	7.319826214	7.346266082	7.193550556	7.228542242	7.328672203	7.347363902	7.309703337	7.323347167	7.33810523	7.230389175	7.334334218
ILMN_1652237	11.54889826	7.271005877	7.352590354	7.500494696	7.223418984	8.371272458	7.213566831	9.552410911	8.929357107	9.461927094	9.112475227	8.965293344	9.593180884	8.585391221	8.599969521	10.29534724	9.103991199	8.722201263	9.773939073	8.248986628	8.156111507
ILMN_1652242	7.979149221	7.611693786	7.963542682	7.626089209	8.504104484	7.592148702	7.230303015	7.843395739	7.709580759	7.586538262	7.529380236	7.597620176	7.467061389	7.569574678	7.626421365	7.572147933	7.69343696	7.605329102	7.50710233	7.554414592	7.55043812
ILMN_1652243	11.26409061	7.293171184	13.01846173	11.76792254	7.255066262	10.56635259	7.227898727	9.695539895	11.69277364	10.67503822	9.151687038	10.78593869	10.45022717	11.98408741	10.3685274	7.790272894	11.13632917	10.55525006	7.694584811	10.68789942	11.62805276
ILMN_1652244	7.652465234	11.50851278	9.949601504	9.582434515	7.434349065	7.480308785	7.303106947	9.104216067	7.560631014	7.607195937	7.415307945	7.665502209	7.51934228	7.557712147	7.462499803	7.627869944	7.455369634	7.570571539	7.527189759	7.44022025	7.436186771
ILMN_1652246	7.386626826	7.29727664	7.344273209	7.625313279	7.265495444	7.330164497	8.869641736	7.363156146	7.335811537	7.365690729	7.309740967	7.367749261	7.314304434	7.392788717	7.410956495	7.423279535	7.459143988	7.275925359	7.355080991	7.308426522	7.322300022
ILMN_1652248	7.746882981	7.550509412	8.338328565	7.967865844	8.030438454	7.507315303	8.650589108	7.549435839	7.552854158	7.596440869	7.514370929	7.601262276	7.53492115	7.577289414	7.621885174	7.574614808	7.505385657	7.623819846	7.544222406	7.636923778	7.596722471
ILMN_1652249	9.4012376	11.48285174	7.336826865	10.12751285	7.190366035	9.227211421	7.213151787	10.64265149	10.44313263	10.94810906	10.36350453	10.85266068	10.19844847	9.868644947	10.31116488	11.51015518	10.38086995	10.67199504	10.91940883	9.995694315	10.00987688
ILMN_1652254	7.343491051	7.286721653	7.346072432	7.311020272	7.599132986	7.301218493	8.07923318	7.33707296	7.308840633	7.27751707	7.247074427	7.225687187	7.326951916	7.388812522	7.261347099	7.408979016	7.339945866	7.269675583	7.357081676	7.363080075	7.3121645
ILMN_1652259	9.869308335	11.53548079	11.81942983	10.41239175	11.60384339	8.124127338	11.93799809	8.238393132	8.228209448	8.449670683	8.056739217	8.247102878	7.904572273	8.285234107	7.99172096	7.932164275	8.099712128	8.055206936	7.935079277	8.02775473	7.856118062
ILMN_1652276	7.388043113	7.302192638	7.919031617	7.496321287	7.317632758	7.411703788	7.242008264	7.31607539	7.456595873	7.5550942	7.40853072	7.476772185	7.46511027	7.317399922	7.37819651	7.355855057	7.384869424	7.405005586	7.472524461	7.494386398	7.433257654
ILMN_1652277	12.46124087	11.75206037	7.88819517	11.83693206	12.60952844	9.887268755	12.14611178	10.01438023	9.188313479	9.540955332	9.5298479	10.28130751	9.367102895	9.390732743	9.133239676	9.164853045	8.336658149	8.936869249	9.185762894	8.34766191	8.29061018
ILMN_1652280	12.68521804	7.478167586	8.051701817	11.8060504	8.172282163	12.71798954	7.27269744	13.62826914	11.90271873	12.09940396	12.18467588	11.40693917	12.52753086	12.12265832	12.25663372	12.44479505	12.17610006	11.84217839	12.50607912	11.94800801	12.58143741
ILMN_1652284	7.412161073	7.295943361	7.369357652	7.337180105	7.281545235	7.317561635	7.295300515	7.385546913	7.349179804	7.305283312	7.373183377	7.356970798	7.411061346	7.318814642	7.405795765	7.279740897	7.3880418	7.304619745	7.257816569	7.460708521	7.319836674
ILMN_1652287	7.32685131	12.47420882	7.297483798	7.262427197	7.226301741	9.155671349	7.213751272	10.45707625	7.294155087	10.08946104	9.433862903	10.84015414	10.14769802	10.57162944	9.801448956	7.333759904	10.4956999	10.22199232	10.06390638	9.608826031	9.525062466
ILMN_1652291	7.409622788	7.296269875	7.311712034	7.268337694	7.221818493	7.285199989	7.146510223	7.259170462	7.276782458	7.267145668	7.395586548	7.300907953	7.240575452	7.321660562	7.338390654	7.236191361	7.326444014	7.286616969	7.300873476	7.315110889	7.237484498
ILMN_1652297	8.22071701	10.59215856	8.656808928	8.198619969	11.45457217	7.590750252	11.34524279	7.738715646	7.783448157	7.74160845	7.635779294	7.610809604	7.639969194	7.615875643	7.608153381	7.673725306	7.642322559	7.64199773	7.766871114	7.602974384	7.613220635
ILMN_1652300	8.350722014	10.98940534	7.393504377	8.187370852	10.62414193	8.321393029	7.616794836	9.48533492	9.441482569	9.023294552	8.989978017	9.19191604	9.178070366	9.630531217	9.268912923	8.899935009	8.770110765	9.772286532	8.979243487	9.289026588	9.214855061
ILMN_1652306	8.045562921	8.357797185	8.043953932	7.75717065	8.293411601	7.871433995	8.409581152	7.930562508	7.839098339	8.15639503	7.723268822	7.619371539	7.705488802	8.205999919	7.595008829	7.59662411	7.791335752	7.873508819	7.507081532	7.683082736	7.647351883
ILMN_1652309	7.554952927	9.201115742	7.383023229	7.390583576	11.49536824	7.723720696	11.84248876	7.470440316	7.427841361	7.268263932	7.371841526	7.445960259	7.423600513	7.403673635	7.441362886	7.544139301	7.429783131	7.39655748	7.352802398	7.503806138	7.473290933
ILMN_1652313	7.537770488	7.507834594	7.354521312	7.432512158	7.292917845	7.569723311	7.404446233	7.597107731	7.72970849	7.399480866	7.54791865	7.455235594	7.566342627	7.766885445	7.467412946	7.520661067	7.704342389	7.558749099	7.428288962	7.407621612	7.447098046
ILMN_1652314	11.39205004	12.98499282	7.463366292	12.06678581	13.21886139	9.102188038	13.0367889	10.23495886	9.583861489	9.8703556	9.588845531	9.73489903	9.609128708	9.147192826	9.068068364	9.457984167	9.30972675	8.683535261	9.935088169	8.589118258	8.789894179
ILMN_1652319	8.113583566	7.596858132	8.043351647	7.806858927	10.08500823	7.63579214	9.363819021	7.700759311	7.583091114	7.604004946	7.567170094	7.515320486	7.573423897	7.561871051	7.636380126	7.469157128	7.547451235	7.601201539	7.575819745	7.584763271	7.511550241
ILMN_1652331	7.246484927	7.292349824	7.323612506	7.278003632	7.215888255	7.534835359	7.373142714	7.474620596	7.367750413	7.336412339	7.422411052	7.442664124	7.441647306	7.326288019	7.376405427	7.415007262	7.381810876	7.437181386	7.318227817	7.425632841	7.503238838
ILMN_1652333	8.39575921	7.265972109	7.352741176	7.236637368	7.210158096	10.69062383	7.205605307	8.954955733	9.65213703	10.15180752	9.628253571	9.27153223	9.750496766	10.02073345	9.851346514	10.08474218	9.993386884	9.832413106	9.502059946	10.68177043	10.64738454
ILMN_1652342	8.876308665	10.5075252	11.32677488	8.691237991	7.526155734	7.646790892	11.80649416	7.808906634	8.021022602	7.984527071	7.890204351	7.933749947	7.872943972	7.929770642	7.797572182	7.781703543	7.804813786	7.92539902	7.749518158	7.781408467	7.729604615
ILMN_1652343	7.406703403	7.302921715	7.347165155	7.492919779	7.223870065	7.348189766	7.222908284	7.338466888	7.338164111	7.282108412	7.346303989	7.453510103	7.376870575	7.302667318	7.330849337	7.321956259	7.334768289	7.358202145	7.435131994	7.37788248	7.300237144
ILMN_1652348	7.743331416	7.310105253	7.921884792	7.592159195	8.43712797	7.532277668	9.298487998	7.666977004	7.576504226	7.682687626	7.868855458	7.579587407	7.959341037	7.639685104	8.135911212	7.422360751	7.540824851	8.481343028	7.593671417	7.51929233	8.04398377
ILMN_1652357	7.436413423	7.295947496	7.345021126	7.266077493	7.16185158	9.618079562	7.200390829	10.31592871	10.24757268	9.901265902	9.786654645	9.894832128	9.956423393	10.30625856	10.23053758	10.23288535	9.516077952	10.24626872	10.15402517	10.26326001	10.33323647
ILMN_1652365	7.262105799	7.271559512	7.329493531	7.286729476	7.224221142	7.297610876	7.208787378	7.230094489	7.330396887	7.301464305	7.329682848	7.081735807	7.250051238	7.326503278	7.214856398	7.317384803	7.243649181	7.290128739	7.284809792	7.249311481	7.187991149
ILMN_1652366	7.213869244	7.271771311	7.193228175	7.2293525	7.224990266	7.238423228	7.212058267	7.333539317	7.591184675	8.152782663	7.78877203	7.209239838	8.347403308	7.328506738	8.070718179	7.657678948	7.217150512	7.283334619	7.316878691	7.597826652	8.103423092
ILMN_1652368	7.42910448	7.277989238	7.349511214	7.28079171	7.196705748	7.345027767	7.209163443	7.353589395	7.42070674	7.479875664	7.263500827	7.387737381	7.305239199	7.373915791	7.377952007	7.354412473	7.287371356	7.329801083	7.337679209	7.259914477	7.365964511
ILMN_1652369	12.39659487	7.292845802	7.269168774	7.364826346	13.33515364	11.36738435	7.238361313	11.90779755	11.89700375	13.10435132	11.59503137	11.94293424	11.57464229	12.74981374	11.09416707	11.96277979	11.60012982	11.95770661	11.99842639	11.44886254	10.59349056
ILMN_1652371	11.27988377	11.35294739	7.123446355	9.389440113	7.221908845	8.49316765	7.192853586	9.135110993	8.811835561	8.399871771	9.064472196	7.91076087	8.37294637	7.786640632	8.177783032	8.579885834	8.108909507	8.907528094	8.413792647	8.44658802	8.221288591
ILMN_1652376	7.221051811	7.267394546	7.140021276	7.215087717	7.214711493	7.181772526	7.161969291	7.18909464	7.223448725	7.140087714	7.175852036	7.206862112	7.170780888	7.170438011	7.112465572	7.087757068	7.10515043	7.159995062	7.148853967	7.231057025	7.125703921
ILMN_1652378	11.31459962	7.272163653	12.1931279	11.70518986	7.226023604	10.27760973	7.156955392	11.14569905	11.2565375	11.70473917	11.19209283	11.4954981	11.04598227	11.13310194	11.80367163	11.63559163	11.74751089	11.54575771	11.90037638	10.75019973	10.40023485
ILMN_1652379	7.543660757	8.434709844	7.320719278	7.608054374	7.226051526	10.45011444	7.217035482	7.878122342	8.11864696	7.779786846	8.135678263	7.755786567	8.367984507	8.204892563	8.262716177	7.934943343	8.498412227	8.235386644	7.982946181	8.63248867	8.750205584
ILMN_1652381	11.63805323	7.294669296	7.371098967	10.52082212	7.223434565	9.098622785	9.197493432	9.88182399	9.130423201	9.797345435	10.33427592	9.915771044	8.991263462	9.390635184	10.79108501	10.59396759	10.1265312	9.423770213	9.907334081	8.986724914	10.0117918
ILMN_1652392	7.260693806	7.291824167	7.313627539	7.239247935	7.225283978	7.373130074	7.215948599	7.267765036	7.409567514	7.201159727	7.27104354	7.296891922	7.29546588	7.226907454	7.303557969	7.288893051	7.278925268	7.246425477	7.275210011	7.404246064	7.311700505
ILMN_1652394	12.13509689	12.69488954	12.80925863	12.46588453	12.54545221	10.90122443	13.10061675	11.05537293	10.49845466	11.30518958	10.28240592	10.92529206	10.38318898	10.73932378	10.94584988	11.02539421	10.83307619	10.92660726	10.74055117	10.54030507	9.925474314
ILMN_1652397	7.26339896	7.190987214	7.349080847	7.214016204	7.148452156	7.244316961	7.184558107	7.193609618	7.200800974	7.170098087	7.200863312	7.206744574	6.988082537	7.226764765	7.261701888	7.294705347	7.237225997	7.283131658	7.152948714	7.312900023	7.238562848
ILMN_1652407	11.62655245	7.278783597	7.324767189	7.273282145	7.204776832	11.99275759	7.213184648	12.03492077	12.91268695	12.31181184	12.90851404	12.58096368	12.49701852	12.64129912	12.46526527	12.31454251	12.58777914	12.34941748	12.32657891	12.44726367	12.86355496
ILMN_1652409	7.249839797	7.284670445	7.356374184	7.227262584	7.140074794	10.19565781	7.205544122	9.860992551	9.955776702	10.1659063	9.580502795	10.26599068	9.729552883	10.29190614	10.13823177	10.03664371	9.918573587	10.32698008	10.47526055	10.82167394	10.53578942
ILMN_1652412	11.2785883	7.153076059	7.297176844	11.86723951	7.152893407	11.96589254	7.181984459	12.27216066	12.8781051	12.80866924	12.27118373	12.8777356	12.13920683	12.68452885	12.85914263	13.00019481	12.97323604	12.82245695	12.69867909	12.63656166	12.59777556
ILMN_1652413	7.227948569	7.213274225	7.155760802	7.280942839	7.219669923	7.931097179	7.196048984	8.522893953	9.047291757	7.180651565	8.056162891	8.67654718	8.407101351	7.290712504	7.731967409	9.780361297	8.133400004	7.309503098	7.256061731	7.81366763	7.876392571
ILMN_1652417	7.223239126	7.219598527	7.324740438	7.426043342	7.223476974	7.357076789	7.215646168	7.363812608	7.422908518	7.340517838	7.290669385	7.353230038	7.36856967	7.471551878	7.332825292	7.430202437	7.32503993	7.336075402	7.433431433	7.316969822	7.346442739
ILMN_1652424	7.26620075	7.286951691	7.348651671	7.420818082	7.196794651	7.326585385	7.213728884	7.360882044	7.3825412	7.30009586	7.416978827	7.36820118	7.413484896	7.426864754	7.308972777	7.362709146	7.427206545	7.380687938	7.404765838	7.351010433	7.332531995
ILMN_1652429	7.452900739	7.295229852	7.279055956	7.252350168	7.225615707	7.365096461	7.21459468	7.29012484	7.307452483	7.238065444	7.254302227	7.324814778	7.275630545	7.35385491	7.390666193	7.402843835	7.290238722	7.317736516	7.162753786	7.330400669	7.286219837
ILMN_1652430	7.537102129	7.291319563	7.381986112	7.443106149	7.243988223	7.435827172	7.307955058	7.322479199	7.406811299	7.484295347	7.371042466	7.387653987	7.367615409	7.454682528	7.397611622	7.355161821	7.471104319	7.355639058	7.460586458	7.35447605	7.430634763
ILMN_1652431	7.201397948	7.188050795	7.287231376	7.246885111	12.79053349	7.722193767	7.195631486	9.032974443	7.212804754	7.236632985	9.365321044	8.186594073	7.575107638	9.111768758	7.910294592	10.18056563	7.620216946	8.293667055	10.06890227	8.226752511	7.879040064
ILMN_1652434	9.407134206	11.40917015	8.064764371	9.212384989	11.59990741	9.740982742	11.85208681	8.735717966	8.536922607	9.226272449	8.839376696	8.686026638	8.783263327	8.369739165	8.55205371	8.99793716	8.589149937	8.708714482	8.389044675	9.419555576	9.724990353
ILMN_1652436	7.368944808	7.291547747	7.289083277	7.325904402	7.215715553	7.28383047	7.194181984	7.279723009	7.346559894	7.296099682	7.23268247	7.274874538	7.308745454	7.288263845	7.318844225	7.271910887	7.3256649	7.293472004	7.200321117	7.321098689	7.289067967
ILMN_1652439	7.527901251	12.03803902	7.366246188	7.783256912	7.686255422	7.530613414	7.214930517	7.678402679	9.522223035	9.160526752	7.567945855	7.807671111	7.600203267	8.791976779	7.559576541	7.614202718	8.551400328	7.63235474	8.19379263	7.510441119	7.490156141
ILMN_1652445	8.629624333	7.636382814	7.770850141	9.508623871	7.344073041	7.720557872	7.742594819	7.68519378	7.628500024	7.716353705	7.572839694	7.634256699	7.576758327	7.604138118	7.672247012	7.591276238	7.666181295	7.709894634	7.588523035	7.552281635	7.595676869
ILMN_1652450	7.484751005	7.51875954	7.95810393	7.486636582	7.22723524	7.440122191	7.210585925	7.657909234	7.4210998	7.45498615	7.484085949	7.44802069	7.495867756	7.477326712	7.461475742	7.488572718	7.509368784	7.468692881	7.464500117	7.401502309	7.515025902
ILMN_1652456	11.77093096	12.03122426	7.320855139	11.78756538	7.193203815	10.48152472	12.70755995	12.11776988	12.72083728	12.30657613	12.12322288	12.47320252	12.15457354	12.41192016	12.07574638	11.38884783	12.36520446	12.40757892	12.35007919	11.9239955	11.45443035
ILMN_1652459	7.962571505	7.334040651	7.88252183	7.647183571	8.128169969	7.572084895	8.380879256	7.64621085	7.629236478	7.666741866	7.618660581	7.568030515	7.506071507	7.538702844	7.528491996	7.511537612	7.573619413	7.532200895	7.507967996	7.532558728	7.493783036
ILMN_1652461	10.5782557	7.292564538	7.354568898	7.359660642	7.226428279	9.213630564	7.209503988	10.03822316	10.62895809	10.00333775	9.513911621	10.424238	9.256696487	9.902214306	9.695680965	10.59980121	9.916860381	9.849622842	9.337920483	9.822474129	9.733180753
ILMN_1652464	7.314854966	7.278563505	7.347293038	7.388355767	7.604473243	7.322831761	7.20160505	7.290241065	7.256529033	7.322114447	7.611522278	7.261454916	7.199670049	8.545928738	7.993894693	7.337067999	7.319863465	7.320746066	7.288999684	7.253418205	7.24122838
ILMN_1652465	7.21760079	7.196769529	7.195846038	7.24797428	7.143145261	8.537888186	7.188943033	7.259435811	9.542459954	7.328226412	7.507125821	7.821653907	7.942699679	9.114590401	8.23324903	7.252459387	8.499975581	9.13077055	7.770775135	9.316955277	9.862277506
ILMN_1652466	7.212844433	7.286050519	7.312545799	7.241915159	7.224333225	7.269694661	7.205298824	7.283558712	7.345274054	7.312935493	7.198190859	7.150326112	7.17109846	7.202325424	7.264307113	7.261104242	7.228293938	7.254699685	7.229371642	7.263332127	7.205028749
ILMN_1652469	8.43409582	9.216738429	8.885326581	8.243791526	8.831762035	7.781186752	9.304606407	7.831241634	7.808901853	7.726940784	7.684107555	7.744402235	7.641167417	7.632199118	7.653658254	7.73846201	7.675226766	7.848823627	7.663821054	7.785155031	7.712651139
ILMN_1652472	11.32495169	7.256653717	6.972371375	11.30947399	7.223992119	11.67205614	7.197855272	10.51503007	10.88127705	10.56208642	10.25396248	11.03823546	11.20842244	11.27209089	9.927406091	10.37142301	10.65789165	11.00105375	10.55880241	11.32114668	11.73899396
ILMN_1652486	11.98439314	12.98167956	7.385917082	12.06392012	13.39810693	9.450715805	13.50702663	8.90521624	9.896827888	9.798588429	10.17887612	10.23078848	10.12901537	10.25478722	10.13681686	11.03174659	10.65462176	10.17517677	10.11730139	9.168061297	8.852983439
ILMN_1652487	7.746564958	7.50294811	7.226670768	7.865320602	7.237695267	7.677067388	7.867963051	7.546561895	7.422255972	7.509197384	7.566937015	7.555105456	7.61960921	7.58044424	7.612812247	7.488939662	7.50056883	7.601970071	7.532493168	7.632506021	7.647522624
ILMN_1652488	7.693947237	7.791935507	7.339410072	7.366404522	7.223990508	7.286493979	7.275624082	7.236135361	7.375746098	7.341882094	7.258125847	7.256535958	7.196831912	7.288946624	7.405962189	7.380500806	7.362718035	7.300985591	7.388002753	7.311936482	7.236779678
ILMN_1652490	11.96938186	7.252550185	7.33490494	12.21217229	12.95929631	11.79319374	7.207061825	10.03710518	11.11253053	11.58736151	11.47073652	11.31185878	11.96395199	12.0829678	11.68502478	11.90892931	12.04540531	11.27166318	11.58356915	11.57180366	11.63838827
ILMN_1652494	7.22603803	7.266535508	7.166673066	7.270854864	7.160599205	7.396115178	7.182856436	7.28151085	7.795445663	7.282630381	8.11141634	7.268708122	7.638753696	7.20021852	8.32310139	7.571351538	7.845298445	7.742175074	8.252907281	7.741625975	7.956269086
ILMN_1652505	13.44733147	13.90836543	13.05358476	13.26274942	13.59334186	12.65989411	13.89795984	12.13037126	11.64693833	11.94369111	11.64217162	12.08258061	11.69379027	11.28008697	12.30397674	12.1166623	11.79420826	11.73816209	11.8786133	11.89885627	11.82695806
ILMN_1652507	7.314952763	7.282327411	7.344618413	7.243331738	7.225695194	7.355411904	7.205080204	7.293618278	7.324015417	7.413160383	7.360114028	7.402685626	7.410025019	7.480933072	7.33589721	7.42673891	7.350361337	7.350599691	7.363114405	7.315374232	7.375773531
ILMN_1652512	12.15203975	12.51840277	11.98648297	12.48481148	12.71702677	12.98543553	12.80240497	12.2570142	12.2236328	12.0445537	12.79238269	11.94855573	12.63363138	11.7631598	12.78099425	12.21772683	12.90102837	12.79125098	12.23010234	13.01965326	12.51115053
ILMN_1652521	8.3912396	10.90923451	11.81471164	7.910769845	8.209069867	8.58963483	8.19681877	8.195188568	8.57194806	8.287940692	8.144927072	8.416291034	8.303074697	8.254144492	8.108162741	8.584036114	8.427822879	7.999522327	8.844058137	8.260778131	8.294512034
ILMN_1652525	12.04058822	7.250235241	7.252138665	7.424840421	7.202942893	12.96526902	7.191661964	11.79621179	11.71474595	11.4540302	12.20508465	11.66475574	12.10901367	11.84353573	12.06049049	11.34472766	11.45948402	11.0875487	12.12117744	11.47844819	11.83397818
ILMN_1652527	7.295803113	7.301849383	7.266768226	7.272855417	7.226688471	7.24354143	7.195341773	7.260345787	7.298400314	7.273850643	7.36987607	7.242459466	7.322679582	7.257787939	7.227467504	7.329449828	7.301526899	7.277247746	7.25830727	7.277223558	7.242492503
ILMN_1652533	8.818396141	11.46014092	10.74911625	9.049875181	11.69946008	7.833495859	11.94792793	7.996297684	7.828194794	7.922042225	7.711295492	7.821425044	7.7170078	7.904819602	7.848945608	8.152831138	7.777890591	7.845200714	7.864505847	7.733327927	7.712357449
ILMN_1652540	7.324889987	7.301530275	12.13468121	7.352152376	7.657320234	8.663804363	7.419119621	9.437373271	10.59851869	9.840142721	10.1059689	10.90278888	9.055860932	9.648728822	10.15738154	9.453925644	10.16737376	9.983633651	10.03008722	9.099855784	9.341762784
ILMN_1652549	7.22599019	12.47687398	12.91659	7.405908145	7.670126438	11.52125728	7.780396234	13.09135569	11.46095919	11.70569801	12.47408437	12.43414075	12.36165509	11.49998618	11.35796454	11.65347149	11.79520506	11.39444165	11.40869195	11.19823093	11.95539443
ILMN_1652550	7.260085011	7.212929707	7.575976599	7.270648648	7.224384731	7.309203445	7.346111393	7.448002707	7.421521122	7.463607007	7.447594771	7.455555678	7.401537137	7.459794569	7.273077617	7.517978848	7.335885989	7.371538922	7.374256773	7.34898859	7.309534597
ILMN_1652574	7.296466361	7.250324953	7.319934203	7.252774177	7.167474548	7.27574873	7.202015116	7.281893008	7.239015149	7.313519959	7.2632379	7.293499319	7.255573657	7.182178908	7.303535431	7.325504834	7.157457525	7.282425283	7.251842925	7.212302906	7.317411747
ILMN_1652577	7.756671751	7.28266981	7.443217084	7.528839339	7.648403309	7.515799484	7.214844183	7.591695552	7.448647552	7.650697711	7.432108438	7.45352711	7.583734317	7.474928717	7.489733704	7.5471825	7.521434044	7.473593616	7.376589191	7.524695781	7.537348321
ILMN_1652578	7.261337638	7.243567707	7.262007007	7.248340383	7.201132495	7.295807446	7.160513244	7.329275977	7.313161695	7.246936533	7.257479103	7.353772034	7.368998143	7.257406514	7.297310421	7.305452437	7.237329264	7.334097399	7.35417699	7.239121659	7.23569435
ILMN_1652580	11.28866192	7.256743298	12.18741642	11.7563551	7.221975451	9.540887761	7.186627569	10.21998869	10.16139891	10.97499462	10.25198256	10.69750924	9.915307977	9.928862061	10.26503655	9.305593254	9.930664187	10.34240081	10.78480823	9.516940206	9.785073015
ILMN_1652594	10.21703139	10.081093	9.112628287	7.760531923	10.44284799	9.762197507	7.710352519	8.055643376	8.603323075	7.710983708	8.846599571	7.81349742	8.374302419	9.269387826	8.072954192	7.478346455	8.922924337	8.76584106	8.601006003	9.158897312	9.303161709
ILMN_1652602	12.77480159	14.00749449	12.96035871	14.27017559	13.83775979	11.74152701	13.70613875	11.70765688	12.07112677	10.96836605	11.81284835	12.06157707	12.07496611	12.47865943	11.37757568	11.4599636	11.6164789	10.53249142	10.83152521	11.33835791	11.6053959
ILMN_1652604	7.441387447	7.386995535	7.355684087	7.523829727	7.98933942	7.467600815	7.65520701	7.599221009	7.476657585	7.628938466	7.488390225	7.492727415	7.486300994	7.494616617	7.483805975	7.548542282	7.48172451	7.451134444	7.506715762	7.45668867	7.465265269
ILMN_1652609	10.13115425	7.188332694	7.247891256	7.224751847	7.2108978	10.53234922	7.170018382	10.96856601	11.42713689	11.67976518	10.78191743	10.86729261	10.33873943	11.48961033	10.83580353	10.63824733	10.84374093	11.94616854	11.39957078	10.91827995	10.83305711
ILMN_1652611	7.336423342	7.291760366	7.782039033	7.281174763	8.810732295	7.324066845	7.253048917	7.363095816	7.331571987	7.462637864	7.303389812	7.293410843	7.392037535	7.367802355	7.367094073	7.360850548	7.356753822	7.414206442	7.434404802	7.417469367	7.415330174
ILMN_1652628	7.266377847	7.244854165	7.308694187	7.265596185	7.230511109	7.275155069	7.208130226	7.280881411	7.311479781	7.225069556	7.290182499	7.295191175	7.362365553	7.318790107	7.339547718	7.314054249	7.292861801	7.273658116	7.374426664	7.265263745	7.2795994
ILMN_1652631	8.815646307	7.231239616	7.341522691	7.396415344	8.56037027	14.29118036	7.216275505	13.78749783	13.59354461	13.51577099	14.27458428	13.49453807	14.59775813	13.09951813	14.06991446	13.90868414	13.71660122	13.55373034	14.233131	14.3197372	14.47188805
ILMN_1652638	7.525863163	7.32083245	7.191773697	7.259754434	7.213851788	7.522403291	7.569020958	7.529941842	7.361324392	7.387927851	7.462850286	7.43824292	7.433363442	7.36159978	7.337830492	7.367578885	7.429035172	7.324587601	7.524008817	7.388482646	7.411387246
ILMN_1652639	7.469801289	7.290615702	7.353708721	7.26620978	7.222453957	7.39174623	7.211077923	7.367085866	7.41652759	7.36233131	7.340195999	7.365593576	7.319781665	7.381093908	7.31849085	7.337176375	7.380457366	7.420839851	7.285890362	7.33287868	7.323143469
ILMN_1652646	7.219546328	7.290571682	7.186483077	7.319322167	7.224182873	7.249664246	7.206633245	7.265022176	7.321452066	7.273337342	7.353284508	7.393977818	7.319154699	7.346417314	7.320055076	7.323581924	7.21548815	7.220108615	7.372000051	7.36926098	7.338739443
ILMN_1652647	12.41426651	11.6316875	8.751491248	11.91512699	7.516572087	11.31326652	7.344439592	11.76273858	11.75436204	12.19004462	11.66835032	12.15597166	11.81101434	12.09411804	12.21811405	11.91777047	12.13683986	11.73623962	11.82751691	11.5484098	11.506194
ILMN_1652649	7.249760635	7.270185981	7.231058513	7.221230409	7.178231428	7.373907076	7.183868901	7.308081898	7.366948982	7.203405547	7.337855414	7.199607548	7.333972114	7.390725058	7.409199083	7.370651511	7.372940221	7.413368791	7.418425337	7.330132111	7.32443295
ILMN_1652650	7.310044646	7.272738484	7.321618314	7.413912424	7.202389466	9.974790747	7.212687803	10.8054869	10.85620252	10.50538661	11.9653894	11.21140825	11.74011105	11.23905448	12.26291706	11.3152822	11.56750041	11.64216592	11.46199002	10.97268384	12.01189913
ILMN_1652660	7.289563883	7.259751719	7.304691135	7.235219289	7.229831429	7.311543282	7.204918332	7.303759548	7.298719623	7.267232004	7.284127785	7.292186544	7.298677495	7.297835125	7.245868697	7.364477421	7.288969791	7.288666472	7.355328797	7.301888565	7.309559454
ILMN_1652662	13.85295253	14.13439993	13.89442594	14.1426806	14.11946557	11.25997677	14.18343178	13.19718604	13.27312355	13.44203514	12.23761737	13.64690785	12.09081801	13.48422997	11.70809349	10.09718519	12.43397351	12.49519042	11.65424642	11.97497256	11.85401843
ILMN_1652666	7.323685112	7.30025293	7.330661087	7.363187591	7.226540605	7.354558958	7.220028729	7.381763678	7.381656411	7.361300865	7.309933931	7.422665343	7.366381398	7.284339151	7.334380917	7.4335964	7.371267405	7.35874711	7.343249936	7.319697069	7.408345539
ILMN_1652670	7.231964686	7.271497127	7.29329831	7.344553612	7.222871858	7.217083427	7.186306975	7.271455071	7.294035798	7.337333855	7.321555032	7.368596636	7.279201738	7.368107641	7.333767697	7.318313722	7.252431696	7.276860267	7.307740244	7.305549054	7.232420348
ILMN_1652674	7.312903716	7.301617845	7.382208663	7.462973478	7.223626994	7.551637943	7.198783575	7.497222046	7.477880846	7.489328725	7.328012858	7.481437166	7.331422351	7.394977224	7.392067013	7.433305036	7.365745843	7.474113735	7.378571464	7.394087188	7.36161831
ILMN_1652677	12.1315885	8.859939106	8.143485144	8.079860363	9.19652115	11.14155123	10.46592651	11.47311471	11.73398322	12.17577681	12.14218695	11.84524328	10.63904902	12.11170101	10.85644177	11.54896537	12.06764869	11.26223847	11.90859359	10.50446586	10.48389314
ILMN_1652680	7.295566795	7.295736872	7.330725259	7.228552296	7.20953128	7.250026235	7.207349765	7.284760957	7.33978981	7.262880489	7.387087916	7.187063473	7.264568276	7.401810288	7.264132351	7.214045278	7.247819233	7.30524581	7.247058611	7.28050388	7.247973155
ILMN_1652685	7.438819497	7.276584026	7.46455486	7.88431712	7.230579347	7.398694387	7.226684671	7.559141321	7.505539132	7.442586007	7.489255079	7.480840455	7.539285493	7.456454265	7.428713842	7.537984209	7.5098406	7.440311417	7.485582584	7.488907486	7.507746947
ILMN_1652687	8.304330609	7.300728684	10.05299696	7.594682668	7.196120586	7.366322924	7.209537679	7.435204527	7.407603864	7.581680996	7.567559505	7.525464433	7.553893578	7.499394788	7.509096305	7.570398655	7.417489039	7.40459718	7.665342344	7.403611912	7.395354458
ILMN_1652689	7.393529702	7.296903964	7.30077359	7.363943114	7.218831385	7.334252987	7.331302295	7.390896201	7.299490713	7.395932691	7.34139337	7.431592444	7.351783986	7.257738158	7.382924163	7.317139414	7.293997862	7.373506473	7.33907579	7.287143895	7.364399754
ILMN_1652693	7.216520609	12.57131347	12.90734112	7.237788163	7.172662225	10.7582344	13.10743069	11.98093131	11.52461584	12.39207413	11.53211407	11.17374882	11.16104306	11.98983587	10.84570758	12.23387981	11.7698111	12.85823622	11.69704105	10.91286376	10.42899876
ILMN_1652694	7.231590924	7.250679838	7.343052644	7.275153659	7.209178964	7.628519305	7.19541509	7.482436323	7.410217364	7.460740067	7.404301247	7.418291033	8.123514559	7.412739194	7.516160965	7.472170034	7.338077378	7.339590893	9.112728734	7.772132087	7.450843002
ILMN_1652700	8.381047376	8.957999448	8.149689358	8.145751064	11.21780854	7.593475072	8.667057636	7.690475095	7.664106407	7.583766139	7.631344678	7.68110862	7.710620473	7.619041039	7.599140309	7.692427799	7.57491651	7.637456387	7.691718002	7.623600789	7.575280442
ILMN_1652701	7.272070203	7.34802881	7.352856932	7.356093306	7.269380119	7.247316562	7.209135917	7.250811459	7.290478054	7.264699983	7.351345076	7.473543124	7.380359603	7.367231967	7.362588519	7.291851289	7.281446659	7.260399264	7.363205736	7.334699192	7.276347126
ILMN_1652711	8.070164905	7.654014075	9.316142163	7.859068018	7.244870814	8.826466704	10.66581437	8.755308605	8.304735829	8.051575325	7.737268589	7.893165426	7.751300408	8.000269543	7.837869365	7.678019357	8.161248783	8.357933995	7.597683142	8.222596752	8.446774668
ILMN_1652715	7.210287625	7.294385537	7.244455861	7.232547585	7.204518109	7.230174865	7.185367199	7.244338157	7.256308236	7.301165596	7.226094596	7.289042049	7.297722966	7.225964455	7.176293383	7.19866527	7.195385771	7.197794279	7.256890593	7.295301106	7.234919069
ILMN_1652716	7.221058348	7.258454364	7.266906914	7.240492404	7.196110824	7.538003168	7.164931585	7.429983766	7.36484938	7.475362571	7.524007224	7.443865796	7.691012726	7.443216152	7.605742717	7.467767988	7.486936149	7.557904488	7.465316414	7.785090513	7.788668153
ILMN_1652719	8.370055218	7.761866737	7.379910571	7.789361922	7.282357612	7.705013043	7.236977139	7.550235108	7.59620944	7.546456048	7.635465256	7.486090909	7.540179501	7.710166613	7.588278177	7.548537304	7.468025993	7.530885858	7.612922271	7.557913942	7.612799258
ILMN_1652721	7.73149041	7.792468072	7.413253513	7.441058765	7.30140442	7.643396838	7.80455878	7.665140105	7.673058391	7.701236418	7.528615242	7.456983575	7.564864066	7.598220952	7.462432065	7.524619082	7.510622456	7.480321965	7.672523483	7.46017312	7.504547939
ILMN_1652722	11.07882183	7.323161455	12.45156679	11.71811822	7.181741859	11.80231253	7.301337569	11.74593286	11.14536871	11.37301817	11.74377984	11.78468477	11.66809186	11.31684235	11.27459398	11.21606538	11.74778728	12.02250164	11.5385095	11.72015679	12.13857135
ILMN_1652727	7.546687549	7.299173912	7.301608974	7.444648668	7.220349785	10.2289686	7.205268282	10.94732045	11.5938369	11.4529632	11.20433945	11.75954436	11.09098051	11.62912802	11.73759642	11.94541218	11.42470621	11.37309215	11.50498903	11.34895905	11.2450286
ILMN_1652729	12.49595631	11.91194101	13.37130808	12.88241874	7.225946448	12.66680335	12.48718958	13.76680904	13.70518547	13.47281614	12.82292894	13.56415469	12.246434	13.52371495	13.35531988	12.586006	13.61618681	13.64633704	11.77341484	13.3744187	12.61843718
ILMN_1652732	7.450640639	7.289513292	7.247878979	7.268778126	7.249472102	7.605342465	7.23800873	8.542439961	9.458624192	9.277307273	8.939129798	7.97238686	9.252973867	8.685335211	9.56399062	9.026674622	8.883641028	9.137429649	7.464624115	8.567816202	8.128671823
ILMN_1652735	9.093273972	11.30068637	8.037317619	10.96693356	8.017616096	8.600093289	8.026347611	9.323100725	9.70531679	9.896711529	9.328947108	9.490903552	8.79195471	8.952516753	9.596721431	9.678978097	9.457177079	9.987642367	9.542352542	8.934374217	9.053145316
ILMN_1652736	11.27940655	11.09796744	11.81665032	11.39697587	7.213850398	9.706725984	11.59202541	10.19298919	10.16491734	9.718825944	9.103077241	9.80100281	9.475655032	9.60360339	9.672725862	10.03193111	9.848157128	9.817725664	9.431877558	9.3093749	9.673065647
ILMN_1652737	7.376409229	7.297088471	7.269860258	7.463987822	7.203608356	7.318201482	7.209373356	7.264075901	7.280108007	7.318163372	7.285016017	7.28915997	7.285098291	7.191825402	7.279842159	7.268367881	7.330291507	7.279173943	7.284947327	7.196031646	7.293591808
ILMN_1652740	7.434486819	8.466639139	7.346546546	7.395259344	7.305064044	7.450896649	7.781479648	7.331776984	7.39649844	7.394990786	7.419570245	7.437328615	7.374262856	7.399212379	7.391391716	7.382508886	7.375987582	7.377370972	7.331095017	7.440899721	7.384683902
ILMN_1652745	7.353955203	7.200022386	7.344421362	7.234294666	7.350222831	7.310507557	7.202009831	7.315371839	7.314624774	7.342552765	7.387681098	7.358986904	7.221730484	7.336543949	7.367158189	7.298224883	7.308885223	7.268144807	7.277616968	7.156134462	7.30215377
ILMN_1652747	7.342772877	7.354448272	7.631058987	7.303024348	7.237590307	7.385228838	7.240734656	7.426241405	7.435072892	7.368322121	7.466710083	7.381494006	7.400048627	7.464465462	7.445670677	7.491422973	7.383763999	7.421682258	7.444978059	7.4060051	7.39471955
ILMN_1652749	13.39597277	12.17983342	13.7233399	13.33873376	7.183672379	12.95653316	12.82823188	14.18547047	13.8478838	14.03861749	12.83266589	13.66621016	12.80916431	13.79476892	13.52532529	13.61109265	13.79843406	13.72029648	13.86087581	13.09885814	12.51216301
ILMN_1652753	12.12858507	7.262510301	7.114340381	11.38634771	7.184000181	11.95392769	7.15990217	11.47067227	11.4362395	11.50946606	11.93665027	12.21549071	11.63438724	11.5160412	11.80769927	12.01548852	12.46431439	12.27255708	12.34842151	11.7470774	12.01628658
ILMN_1652754	13.61160884	12.51257429	12.77908066	13.82612558	12.27210795	13.70379825	12.76991611	13.51967811	13.84418428	13.23106851	13.31317375	13.12917842	13.35880987	13.19512693	13.41976145	13.38159252	13.42205207	13.27801896	13.27036757	13.40848458	13.58598575
ILMN_1652756	9.216102642	11.62756358	11.82493045	10.29889573	11.90332213	8.0653184	11.96083671	8.060405711	8.059507262	8.339449652	7.896825431	7.935655664	7.914031622	8.033191423	7.829859181	7.782515055	7.753511376	7.7514561	7.875628923	7.829677319	7.728529039
ILMN_1652758	7.326058054	7.340538271	7.257895094	7.316083801	7.222860084	7.393562644	7.166102752	7.308643348	7.284070549	7.322738856	7.422145045	7.291464493	7.288212049	7.327786577	7.395692145	7.373928439	7.359619912	7.355535922	7.373067094	7.373214883	7.395447032
ILMN_1652761	7.427421612	7.263553869	7.373692341	7.421207888	7.217024576	7.324654016	7.207581584	7.29488644	7.414368931	7.459711834	7.356124653	7.339415633	7.371523388	7.457669692	7.402383628	7.463373299	7.370912013	7.363638532	7.400226336	7.343892395	7.346747344
ILMN_1652762	12.07370785	12.0534759	12.24651083	12.0822155	7.219733764	12.27866432	7.208095345	13.43576431	13.48258017	12.90704205	13.41123677	13.17550197	13.21293269	13.90548449	13.06461874	11.39072292	13.20826533	13.38822247	13.58969151	13.12098718	13.11971677
ILMN_1652763	7.266244278	7.295735824	7.275055191	7.275340216	7.222839707	7.291989093	7.204124639	7.283315764	7.264612954	7.204698406	7.300103365	7.272359918	7.290824985	7.208575976	7.274355595	7.276942689	7.225575674	7.294816166	7.194963416	7.221513915	7.256523364
ILMN_1652768	8.694126161	9.995863904	9.464812744	8.958054282	11.36723114	7.941606293	9.288930029	7.976154521	7.867613598	8.056235963	7.946692519	7.835026423	8.074944323	8.03347141	7.926329614	8.112137831	7.797296675	7.993120017	7.912270327	7.839501392	7.751273843
ILMN_1652777	8.475632904	7.497096069	8.109706309	8.293888129	12.9300214	10.58090907	7.690353582	10.67420601	11.29562067	10.91098711	11.09497502	10.14689907	10.74491034	10.47823272	10.2792839	10.22152954	10.37528304	10.84177114	11.18477268	10.73243532	9.602692018
ILMN_1652780	11.12271073	7.298773148	7.31725964	7.251798673	7.341013797	10.40664395	7.236394727	10.82186506	11.08326743	11.16269959	10.17121369	10.73874372	9.957962033	10.82194807	10.96522966	10.75773613	10.73324262	10.36040686	10.56597656	10.17490691	10.45922762
ILMN_1652784	7.366822293	7.316894562	7.335004702	7.262777522	7.21863693	7.298939	7.210814649	7.278354255	7.306971258	7.337593053	7.327424517	7.408297104	7.303168226	7.446046393	7.384110453	7.297047642	7.318495779	7.317557655	7.387551282	7.272589308	7.312456804
ILMN_1652786	7.352626177	7.287393491	7.473655015	7.493916478	9.465148925	7.387042738	7.21167593	7.361485019	7.377811451	7.278034689	7.422499525	7.417413838	7.413170768	7.397553716	7.461151396	7.33304604	7.395616935	7.442083051	7.425331159	7.342864268	7.318827941
ILMN_1652787	8.314070859	7.29669591	7.347769062	7.482483631	7.259545647	7.803643981	7.310436165	7.720477652	7.779365712	7.761686692	7.662815908	7.571754613	7.567836899	7.672980084	7.749548204	7.735723214	7.64130522	7.663912147	7.716334729	7.599854507	7.693733088
ILMN_1652790	12.63721741	12.62119413	13.06130302	13.34611745	12.27576546	12.37538351	13.55311035	12.32948406	12.26056042	12.7914154	12.16509484	12.5122907	12.28954427	12.59951263	12.50580302	12.61598584	12.15126491	12.50485583	12.64334505	12.56417602	12.37050597
ILMN_1652797	12.460555	12.45867241	7.209232768	12.43101642	13.26739651	13.8221208	13.09801568	11.99468565	12.00429203	11.38406527	12.33330015	12.16595811	13.19930561	12.21179199	12.63966796	10.76353377	12.92292865	12.57336369	11.61338267	13.23497961	13.6327677
ILMN_1652799	7.619297214	7.289739367	7.321170724	7.376494386	7.259475447	7.30869503	7.255161375	7.297240257	7.316508223	7.415230096	7.422714857	7.446848346	7.329447871	7.455278652	7.427974599	7.468277972	7.39902637	7.368178948	7.447226947	7.410270639	7.306263298
ILMN_1652806	13.47799467	13.77915567	13.94261324	13.60624647	13.81632687	12.39182437	13.80554996	12.87576323	12.93041272	13.03297181	12.6376017	12.74155119	12.73155333	12.9278736	12.63771276	12.80834816	12.66793343	12.77437582	12.75881291	12.33003318	12.34418539
ILMN_1652807	7.256302492	7.313381975	7.528046248	7.449120859	7.216935206	7.839751983	7.314125852	9.485869891	9.35830537	8.773470658	9.145903848	9.952376821	9.402216748	10.38473467	9.850022764	10.08837763	10.27274801	10.19380897	10.23684567	9.458153957	8.950734188
ILMN_1652808	7.214808751	7.300578818	7.246586018	7.242267965	7.209669215	7.237864634	7.209875491	7.240639274	7.2956462	7.396545456	7.202998729	7.314338571	7.294633361	7.15923634	7.308606526	7.255851716	7.2101737	7.27912768	7.210310005	7.341332109	7.263571531
ILMN_1652819	7.477867113	12.06877071	7.343075277	11.75644714	7.236104257	10.64665028	7.204224634	11.06328087	10.94834756	10.71359993	11.06757705	11.04294035	10.74288375	11.36910094	10.66795844	10.85343585	11.44988985	11.17888192	11.5127294	11.03197176	11.05495375
ILMN_1652825	11.62989702	7.271048835	7.367043889	7.358535661	7.57306758	12.49093735	7.230652788	12.19988657	12.27606162	12.61504174	13.37305938	12.63525103	13.19505989	12.03261696	12.86638212	12.49667548	12.06400335	11.87886465	12.42481386	12.28172578	12.92815545
ILMN_1652826	7.592970331	7.669352201	7.404658772	7.822148706	8.161903065	11.38019089	8.062600001	7.376773234	8.462789358	7.354836179	10.13705593	7.365920391	10.55231305	8.990152359	8.992273447	7.449233616	9.072637272	8.191475382	9.7949359	10.28770316	10.57141442
ILMN_1652837	7.216353693	7.267176422	7.24002598	7.218641764	7.219520516	7.261642634	7.194948087	7.323936396	7.263621037	7.286800508	7.271037301	7.211489506	7.293878279	7.214917262	7.219127664	7.227088111	7.376969893	7.315020076	7.172713758	7.270994279	7.226996308
ILMN_1652846	8.260823861	7.684778919	8.770451089	8.001023361	8.863071355	7.561301453	7.986753634	7.70727806	7.750559103	7.911869745	7.570044834	7.622449271	7.646461841	7.744229907	7.725208843	7.658076673	7.660770795	7.760271305	7.603760133	7.667742311	7.54654596
ILMN_1652852	8.100104358	7.351771243	7.466344044	7.525119	7.23001448	7.881028804	7.487697081	9.126532267	9.06146963	7.489129737	8.105475799	7.586409671	8.44512579	7.476079616	8.411886875	7.412804697	7.511643226	8.372714057	7.563263624	8.651485872	8.288722326
ILMN_1652854	7.770060509	7.282796789	7.353205602	7.552358402	7.225727977	7.375958083	7.198882861	7.487060676	7.395679539	7.352474121	7.352458096	7.447291795	7.359810495	7.348690498	7.4234652	7.361897184	7.459298437	7.506657307	7.342893749	7.405232272	7.457659564
ILMN_1652857	8.433988322	11.39848395	7.321015101	7.402867655	7.218834411	8.136622114	7.21298381	8.318612773	7.811306885	7.847553259	7.910183274	7.851370273	7.721269232	7.401940582	7.895970206	8.557811734	8.155116615	7.634940196	8.894954202	8.143600862	7.906267883
ILMN_1652865	8.482654624	9.00241454	8.832882398	7.849615527	8.640135231	7.731881482	9.127179806	7.795442606	7.769451773	7.802034858	7.614097613	7.632735761	7.566568834	7.663036235	7.643774879	7.733674034	7.614356334	7.73468033	7.590762285	7.597780992	7.664956899
ILMN_1652866	11.94009209	7.418160222	7.649699069	11.91372857	7.883115729	11.42628468	8.999140805	12.83259681	12.11941141	12.87489417	11.60595671	12.42659073	10.307182	12.83060557	11.05717554	7.36771963	11.94064932	12.1403164	9.951644327	11.01990165	11.84718314
ILMN_1652871	8.053660732	8.884707188	8.601152504	7.539985397	7.21126823	7.452332286	7.212357909	7.611442227	7.504531955	7.61845252	7.497065422	7.58282666	7.422663183	7.56567032	7.559966082	7.575802028	7.523293721	7.48825473	7.620558185	7.493393914	7.4404826
ILMN_1652872	11.5617796	11.75125322	11.35111866	10.69411413	11.43627967	9.102595951	11.95803317	9.23466215	9.723622366	9.327220232	9.54216452	8.565894882	8.580577306	8.372816263	9.456003085	8.496185811	9.315640977	9.075032158	9.124807537	9.089061623	8.827148563
ILMN_1652876	7.289332149	7.266150056	7.211938111	7.274653864	7.23113292	7.272182027	7.123137792	7.255550662	7.253615659	7.305848587	7.300173544	7.304770122	7.304392974	7.310325075	7.239821753	7.294826232	7.332954905	7.315854687	7.254930361	7.278970973	7.226434022
ILMN_1652881	7.513887995	7.317080566	7.990130749	7.674211195	8.809538372	7.400109938	7.212603994	7.451812876	7.413584557	7.443855765	7.360836535	7.460436644	7.382220315	7.40014508	7.336155721	7.388939665	7.428691148	7.422048993	7.358017155	7.419615367	7.411756124
ILMN_1652888	7.407618818	7.31497047	7.348389151	7.246545288	9.291389396	7.328712369	7.581448991	7.387562454	7.361816074	7.39047582	7.371411519	7.361180498	7.349916082	7.447622677	7.415745379	7.442397407	7.357551387	7.387093111	7.441792035	7.421990084	7.434094709
ILMN_1652890	7.344095903	7.281914414	7.257924479	7.312097249	7.234194809	7.305146911	7.23658526	7.270242019	7.325366674	7.343467672	7.339774088	7.330258003	7.310351029	7.275325517	7.398278929	7.458288213	7.236791888	7.249157061	7.356473635	7.273051641	7.269462216
ILMN_1652906	13.42766768	12.30101569	13.12331509	13.14740342	9.291837152	13.57545175	8.420905668	12.64061444	12.70185368	12.98424751	13.47264669	13.46928296	13.51622706	13.22993814	13.54611651	13.32357122	13.5470122	13.20081476	13.42163088	13.47732924	13.51234395
ILMN_1652907	11.42582274	7.286059529	11.99710655	11.9450428	7.611336816	10.79393129	7.212405055	11.28038087	11.00129598	10.99104933	10.70232494	11.11281401	10.63440078	11.65293742	11.52560515	11.64803094	11.7134494	11.67702887	11.85100932	11.17825156	10.92847149
ILMN_1652913	7.257874272	7.416893495	7.349827274	7.220270625	7.266723953	8.736114069	7.169299105	8.556221091	8.56071355	9.128549142	9.195343303	8.443000753	8.738050377	7.889310373	9.477954286	9.42626487	8.716494361	7.654110122	9.231199926	8.943576151	9.078548208
ILMN_1652918	11.66326116	12.14668415	12.31363367	12.11087633	10.5286171	10.90856334	11.65100016	10.51736507	10.47555956	11.19015687	10.33672094	10.88163056	10.63272685	10.83762095	10.89136494	11.25940399	10.58451386	10.40204166	10.22351547	10.21041691	10.46555478
ILMN_1652927	7.451805837	7.300908776	7.345838517	7.36749295	8.1785229	7.390255905	7.726722596	7.357697824	7.372621837	7.466245892	7.409273806	7.414234916	7.383775767	7.335879534	7.464230226	7.406425636	7.389827966	7.375602321	7.392247308	7.391525554	7.378357492
ILMN_1652928	11.26415794	7.404231815	7.077624437	11.75858399	7.225025132	9.646329308	7.19396784	10.71720978	10.67223815	11.22509766	10.9974299	10.62132644	10.34865932	9.981664474	10.74139958	10.75863599	10.7518786	10.63310765	11.19364742	9.674348794	9.298275322
ILMN_1652929	11.28425847	7.28045139	7.230131639	11.21756923	7.218165268	10.69867081	7.185158138	11.10065047	11.42201363	11.47759195	11.17965924	11.53944238	11.1575981	11.39296673	11.28376818	11.38670239	11.63059844	11.37559626	11.66244717	11.31218749	11.09160351
ILMN_1652931	8.813629429	9.97518112	9.180953261	8.776914383	9.27408778	8.05702969	9.927907406	8.113114158	7.981001463	7.809574953	7.931610586	7.995396284	7.968918343	7.934356567	8.010349478	8.051649949	7.871981345	8.159820812	7.803882279	7.817194908	7.890469461
ILMN_1652938	7.695274542	11.73512368	7.448469708	7.647642672	7.244305485	8.522952296	7.209149269	7.374233251	8.139210264	7.513412892	7.715116848	8.060237192	8.289568515	7.391915433	7.435965511	7.453062974	7.555602331	8.248941118	7.402913104	8.209654943	7.536588384
ILMN_1652939	7.756487292	7.29040084	7.369812621	7.484915607	7.169372648	7.31603206	9.524593462	7.411801802	7.350019711	7.432900599	7.481906037	7.532572309	7.451907683	7.795600063	7.375389266	7.491316502	7.436031503	7.440522241	7.680222338	7.347963338	7.3634696
ILMN_1652940	7.274402801	7.287205787	7.328197339	9.865818685	7.223705348	7.416589694	7.17639932	7.526941154	7.55163588	7.303667694	7.521243028	8.117609868	7.577014941	7.304087267	7.79868765	8.784926979	7.78010708	7.55897515	7.565524206	7.562371098	7.696550495
ILMN_1652946	7.795460456	7.305058317	7.491175009	7.524423943	7.291546785	7.426815248	7.213030602	7.538132231	7.391402675	7.453448017	7.436220087	7.429003739	7.392619349	7.402221681	7.411977559	7.477085873	7.498512459	7.461303665	7.430694287	7.483060218	7.374682879
ILMN_1652952	10.16666847	7.253393758	7.32745664	7.233077891	8.90290286	10.2633258	7.185977675	11.80673381	11.71115182	11.34988967	11.32769339	11.63777132	11.11091281	11.12870291	11.53996863	12.17672741	10.99034355	11.18762775	11.70097565	11.15770313	10.86497837
ILMN_1652955	7.818925651	7.918261551	7.352848109	7.782089127	9.082873359	8.568693453	7.570212678	7.620299779	7.594250249	7.618348779	7.775552353	7.59880773	7.887085745	7.765386289	7.778572672	7.822325292	7.853784994	7.730617758	7.635433117	7.837874571	7.883928806
ILMN_1652959	7.732975698	7.385067498	7.478493471	7.527374188	7.266190601	7.671018975	7.214056447	7.49141253	8.086800061	7.425464527	8.431667928	8.071829055	8.432596034	8.344509519	8.86984736	7.542915672	8.066239972	8.182550208	7.478355486	8.047030607	8.484793194
ILMN_1652963	7.27338654	7.290900888	7.232959313	7.253820472	7.205930492	7.227675609	7.207389035	7.291674702	7.283989089	7.283172267	7.257542876	7.33888475	7.267833564	7.236957775	7.265495727	7.26251903	7.220496499	7.25645382	7.34425019	7.315571054	7.247020614
ILMN_1652967	7.272652308	7.261625628	7.166756818	7.363238586	7.221242399	7.323208108	7.210367988	7.261622632	7.401576262	7.351712113	7.349426489	7.296004975	7.238067774	7.249040996	7.394027001	7.287534883	7.294262129	7.246587479	7.224560897	7.266817102	7.292881781
ILMN_1652969	7.251834804	8.179748733	7.374336926	8.116894862	7.228151732	7.512210988	7.210061547	7.856021165	7.877991522	7.847982284	7.685978653	7.801650233	7.705140265	7.745556432	7.694025116	7.825844581	7.799411521	7.774384673	7.715041153	7.601987358	7.519422501
ILMN_1652975	7.281906715	7.295577851	7.332721563	7.335017858	7.152709662	7.801546365	7.203857921	8.166240897	7.324631407	9.913122922	7.298574746	7.380127665	7.333906796	9.012275827	8.240181317	7.331525313	7.32016299	7.291486917	7.391779125	7.632769379	7.329243266
ILMN_1652977	7.402816643	7.317715358	7.482077392	7.451582496	9.902210762	7.463822082	7.964130393	7.464647889	7.443131502	7.383491794	7.372532048	7.514115577	7.296036692	7.41963447	7.42088994	7.430186451	7.428803356	7.468977114	7.390279522	7.404110417	7.412228334
ILMN_1652982	7.338610216	7.274887729	7.25672272	7.332025678	7.205140647	7.292609059	7.207353508	7.21456735	7.242550365	7.290001951	7.31873787	7.290254715	7.23240485	7.307859553	7.304316315	7.297618327	7.272898566	7.283626559	7.236907339	7.300949125	7.267961513
ILMN_1652989	7.257668857	7.271277867	7.288617833	7.278194309	7.211019074	12.01671981	7.18458835	11.91140316	11.91761133	11.79107968	11.77578992	11.59772211	11.91166935	12.01046767	11.76573251	10.82657566	11.62159973	11.37242604	11.77543537	12.2938544	12.30886124
ILMN_1652990	7.211249011	7.283847065	7.287342617	7.217659708	7.373951016	7.277021583	7.212760854	7.300134265	7.289103756	7.365125116	7.331324225	7.306725871	7.277553231	7.24446298	7.283606507	7.294486077	7.346792913	7.259434985	7.361198429	7.321815202	7.321695118
ILMN_1652991	7.302286001	7.263248075	7.319758595	7.284644116	7.224874389	7.277022251	7.207866067	7.274489537	7.276488044	7.262107703	7.241403791	7.27130176	7.266160026	7.317557436	7.282660884	7.365312171	7.253534531	7.224750826	7.296644768	7.301764275	7.253706908
ILMN_1652992	7.224590035	7.293297825	7.133919158	7.225254802	7.24016221	10.44913706	12.26527448	10.11476962	10.24219081	10.80724018	10.82528075	10.38548757	11.08340989	11.06214409	10.33036171	10.80119051	10.68338551	10.58579786	9.896958552	10.71566835	10.93695261
ILMN_1652996	7.230580599	7.304854199	7.349906042	7.303820536	7.791111482	7.246910756	7.205500162	7.236992512	7.297613291	7.228693786	7.236419514	7.321174451	7.297159249	7.317036032	7.215511253	7.255636005	7.352027099	7.40997847	7.319272133	7.245760361	7.28317109
ILMN_1652998	7.305689616	7.221250657	7.210258127	7.242228724	7.217243877	7.206149195	7.213664235	7.831684943	7.227988899	8.169932682	7.626947952	7.917887854	7.428230678	7.204588566	7.444965496	7.361229696	7.541091003	7.456656102	8.147275235	7.484883078	7.425785263
ILMN_1653001	11.748867	8.929968648	11.67299072	9.088622178	11.42294759	11.2527448	10.72726107	11.23473182	11.48455099	11.85276177	11.30575172	11.47351014	10.68929419	10.995188	11.51106951	11.73750528	11.42266308	11.58858868	11.76920305	10.54817349	10.55833517
ILMN_1653006	7.493383981	7.336348473	7.387189693	11.13877842	7.556705027	7.526726421	7.214817419	7.312375651	7.457938984	7.344923573	8.124158401	8.221114666	7.626591635	7.359957433	7.870063568	8.623179526	7.277294008	7.733011938	7.267171956	7.527789971	7.327257165
ILMN_1653018	7.391665897	7.266240315	7.31770838	7.214630328	7.213414445	7.209180934	7.212989725	7.301966579	7.254269143	7.263497452	7.257586613	7.356815887	7.380074366	7.317446135	7.200891507	7.340114642	7.31050584	7.220472608	7.184579229	7.29278092	7.289921329
ILMN_1653026	7.243660684	12.49968077	7.28813037	11.75768396	7.221600926	9.49772367	7.213584064	9.068353081	8.797471332	10.34138334	12.68358493	10.00242056	10.84000792	10.08352311	10.69215445	11.28609241	10.69077937	10.37315112	11.10146867	9.49314976	11.07018933
ILMN_1653028	12.45265574	7.295539273	7.200145209	11.51710062	7.215674229	14.23538669	7.213743898	13.6934319	13.31832687	13.67543402	14.00345233	13.67433662	13.47045448	13.31851259	14.00290026	13.65777487	14.33706911	13.72757673	14.86265007	14.06975784	13.70593587
ILMN_1653031	7.541667187	8.126103788	7.340987486	7.23197309	7.222655554	7.308551234	7.210386007	7.28887597	7.278451736	7.371659694	7.26791073	7.319193806	7.371350806	7.355400495	7.277599087	7.287167758	7.257107862	7.320156906	7.410385067	7.273693721	7.305835961
ILMN_1653033	7.846483942	8.589740532	7.42736854	8.197228428	9.035963224	7.605570659	8.460331614	7.650614603	7.557458269	7.716564617	7.588423587	7.632614549	7.60129961	7.609016321	7.569291618	7.709902335	7.629779227	7.649229984	7.61631911	7.651742459	7.526105219
ILMN_1653039	7.272842351	7.269116181	7.324014855	7.263490267	7.219942179	7.32251311	7.197571816	7.367971536	7.346827506	7.376989872	7.384047927	7.45804339	7.376742844	7.330577938	7.382201368	7.402238494	7.361786241	7.311549758	7.461605807	7.25791135	7.38308249
ILMN_1653040	10.56135195	7.300038762	7.300895371	7.23081751	7.704719758	10.9469451	7.207364197	10.24048279	10.7778513	9.791027064	10.55067511	10.6444322	11.35209161	10.03024732	9.958207351	11.01820362	10.53701139	10.8443539	11.09864574	10.74877059	10.51537757
ILMN_1653042	13.73585557	14.25880317	13.3702099	14.00021391	14.07241849	12.33470578	14.08055112	12.76482048	13.34790649	12.89697239	12.48502245	13.14846596	12.38925794	12.88963214	13.09628675	12.73657557	12.75755294	12.53571074	12.63400574	11.48590339	11.55091612
ILMN_1653043	7.745184234	7.294673578	7.317936278	7.444012662	7.229478156	7.352767362	7.20999261	7.476857183	7.485591863	7.377604931	7.43278171	7.523986894	7.455794555	7.469155701	7.439773843	7.576796054	7.4024639	7.592657483	7.515436998	7.408492453	7.480869451
ILMN_1653047	10.33498572	11.52260127	11.81580744	10.69935932	10.1359145	8.180911187	11.88137187	8.296195482	8.284884739	8.241556674	7.951186333	7.964467435	8.177128909	8.085134211	8.14982063	8.09087695	8.086741343	8.028269548	8.11408665	8.052221313	7.826010346
ILMN_1653055	7.250734105	7.29831951	7.223797558	7.220959606	7.225857383	7.275962107	7.191094608	7.231937294	7.352074532	7.27193476	7.261312292	9.493212364	7.318165421	7.267759564	7.162076605	9.685044052	7.321956272	7.284281557	7.388841677	7.349493157	7.320452722
ILMN_1653056	7.580289112	7.298821999	7.368560803	7.57792087	7.226014929	7.557976761	7.254163359	7.681604179	7.575903251	7.589676206	7.462867103	7.523766504	7.455800213	7.495173065	7.563799439	7.589877168	7.50977259	7.552092469	7.556329426	7.527337338	7.531474569
ILMN_1653057	7.350207043	7.260831538	7.220752221	7.327194739	7.206929277	7.408592288	7.207032016	7.273613643	7.234460301	7.309339613	7.274033368	7.325663022	7.247550479	7.343127529	7.292958999	7.364363931	7.316350798	7.252321312	7.275542876	7.333205023	7.356884551
ILMN_1653073	11.3418841	7.23952512	12.00772095	7.26972393	7.221896904	7.308993703	7.198330859	7.35753615	7.324239953	7.290326058	7.272639164	7.371714993	7.858268895	7.349546425	7.288823925	7.337295011	7.353420878	7.347555724	7.259353439	7.739380912	7.335479408
ILMN_1653077	7.215022077	7.20727691	7.31206784	7.418564088	7.186974642	7.286091756	7.202081095	7.30400131	7.297303975	7.262414235	7.319194537	7.347980187	7.194026427	7.303212991	7.287319283	7.322026992	7.20605885	7.212500521	7.343592438	7.279555094	7.310283304
ILMN_1653092	7.258425497	7.297591592	8.423597408	7.386985476	7.225508343	7.407167479	7.293920085	7.280010265	7.375691211	7.382609682	7.3729248	7.327538755	7.32720615	7.447168036	7.3124435	7.335295841	7.376691912	7.348322052	7.464633461	7.345059301	7.339275582
ILMN_1653098	7.21732786	7.436069577	7.295815163	7.253202621	7.217648896	7.25105173	7.213253742	7.404027367	7.302827595	7.149949796	7.276643243	7.165714841	7.402702227	7.275013522	7.288861651	7.422478899	7.236005769	7.250228692	7.061449256	7.280030341	7.332014157
ILMN_1653102	9.514842212	9.534810215	9.394395975	8.217494169	12.3384285	10.87092892	8.895228275	9.861030624	10.68831908	9.947926248	10.55357891	10.4644952	10.54540348	10.17399097	10.78187181	10.65130982	10.46536315	10.67607372	10.71215214	10.88003005	10.58619063
ILMN_1653103	7.272674396	7.289813728	7.301721136	7.264635913	7.223594773	7.424141508	7.206323278	7.234340355	7.28544087	7.238270448	7.362120004	7.353528599	7.371130636	7.544616372	7.22707395	7.403387518	7.444671376	7.382156943	7.292176518	7.589868595	7.329893799
ILMN_1653106	7.223213727	7.295041099	7.167638861	7.272441985	7.183498118	7.371349674	7.214994702	7.200393984	7.34199449	7.283464979	7.28017679	7.378466829	7.262506116	7.282421257	7.204541864	7.256939476	7.362503706	7.267257178	7.238201238	7.328973604	7.271133656
ILMN_1653115	13.05216347	7.264750017	12.43634294	12.74305062	7.193558187	13.85402137	13.30324231	14.25270616	13.81839666	13.83346713	13.45285617	14.08949278	13.44224168	14.01065083	13.58372821	13.75229824	14.05022019	14.04360258	13.79259932	13.69743178	13.86936394
ILMN_1653120	11.53741225	7.273281579	7.190159805	11.59107953	7.176352615	11.21454354	7.198811283	9.638171351	10.25501196	9.938653589	10.46299653	10.70521186	10.54310258	10.13663269	10.15898604	10.87522609	9.484661189	9.739128288	10.51650207	9.909997252	10.19117314
ILMN_1653125	11.53375216	12.02724643	12.25537946	11.7871974	11.97632513	9.915093348	12.64304136	8.066048888	8.772790939	8.402333291	8.51492632	8.020912849	7.707169266	8.068749277	8.722929801	8.092879041	7.976738937	8.0318488	8.294024363	8.24567847	8.387568928
ILMN_1653127	8.403028686	7.642303148	7.294500618	9.45651785	7.222118876	7.457773408	7.151360028	7.462750453	7.340887276	7.701190328	7.534426439	7.575324051	7.556948827	7.5302498	7.35730104	7.56118212	7.488175582	7.494374907	7.352483727	7.439946945	7.416971402
ILMN_1653129	9.985015344	7.285749943	7.201814364	7.234697008	7.224314802	11.23726094	7.206901681	9.868121517	9.668182516	9.987579757	10.1257895	10.13277287	10.909045	8.877045668	9.801532708	9.4225433	10.64755163	10.09956228	10.20635233	11.23657877	10.98907626
ILMN_1653133	7.37560092	11.64146432	7.288583763	10.89286071	7.226114645	9.736232763	7.208310197	9.962219572	9.559809335	8.031599364	10.15612484	9.531850619	9.798878052	10.2933478	10.57476605	9.535869515	10.2269462	10.51066507	10.53768878	10.43633519	10.48456831
ILMN_1653134	7.785232562	7.376320929	7.347343265	8.427412628	7.488827065	8.920260831	7.285683766	8.964140909	9.093130224	9.096917804	9.110234649	8.644030721	9.038334685	8.913039777	9.093908249	9.034278453	8.906338083	8.847950771	9.043613202	9.291617757	9.313801275
ILMN_1653142	7.337553688	7.300523767	7.306069256	7.430783744	7.264186482	7.306268995	7.20421805	7.420971164	7.369462745	7.480204074	7.283261667	7.388554175	7.348440099	7.472645043	7.363900731	7.400208886	7.334179254	7.33008882	7.4369804	7.286929279	7.357877572
ILMN_1653143	11.97423151	7.222785481	12.54001778	7.368801432	7.227594902	11.37287481	7.213400172	11.02441994	11.61668003	11.67332673	11.40870097	12.09469065	11.24264648	11.43409238	11.74130488	11.4856906	11.58085967	11.41901961	11.43625811	11.65625541	11.34337159
ILMN_1653146	7.527348945	7.246432353	7.345284755	7.335660365	7.333727935	8.654215271	7.816595249	7.478550045	7.44199419	9.709531254	9.584856705	9.689732367	8.697420682	9.528997998	8.514892736	9.930666247	9.100261349	7.373545632	9.179903424	8.231948696	8.567296863
ILMN_1653150	7.256333404	7.28513492	7.342401034	7.223102948	7.226379819	7.33579118	7.209444437	7.384568412	7.344693455	7.297131199	7.275799683	7.341994788	7.344846977	7.37721525	7.398235459	7.312709655	7.383383283	7.32524674	7.356925842	7.300386143	7.330237891
ILMN_1653155	7.495366326	7.350033033	7.350936481	7.24998347	7.284741722	7.273398159	7.969687026	7.316635174	7.372659585	7.338642593	7.215414019	7.417975567	7.409765366	7.310122906	7.344307848	7.341109064	7.416712576	7.376615354	7.3436525	7.287168451	7.398477942
ILMN_1653158	7.225123297	7.246904921	7.425475824	9.733906912	7.285788726	7.329415792	7.215198738	7.562651331	7.563741304	7.855388991	7.362655423	7.237024351	7.44244124	7.272670035	7.462252583	7.218103911	7.315951619	7.505509815	7.272149963	7.427076081	7.549938939
ILMN_1653161	12.91775298	12.41942836	13.01111014	12.41186738	8.847142908	12.40546361	7.264341922	11.58818067	12.41936075	12.12562404	12.01138083	11.89826283	12.08200625	12.46075409	10.9889665	12.37321179	11.30669415	12.04214163	11.81058323	11.30344822	11.34135702
ILMN_1653163	12.54958932	12.50602148	7.370469568	12.17914687	7.244691305	11.41677698	7.646869797	12.95092737	12.73226696	12.29927947	12.23212756	12.76284358	12.14176045	12.86806911	12.1690504	12.79357582	12.49443752	12.38172287	12.26294895	12.19927835	12.17330804
ILMN_1653165	11.82314108	11.95686516	12.3446978	11.97504442	11.84806975	11.14995257	12.17818004	10.58146526	10.74178968	10.91825806	10.06837665	10.70339636	10.15254864	10.71502265	10.36259249	10.88650728	10.71773409	10.64098192	10.71540101	10.27448878	9.940738308
ILMN_1653166	7.20516719	7.280021828	7.331089754	7.459544371	7.219320525	9.347159181	7.201900459	9.062835295	8.716964171	10.89371135	10.04979421	10.38608297	10.27879246	9.134854569	9.489338071	10.27814644	9.860447992	9.398246434	9.557633916	8.306636235	9.32280912
ILMN_1653174	7.26729968	7.278053157	7.274647143	7.267555238	7.200990863	9.729880993	7.182949771	9.632149139	8.855112279	10.79089339	9.359491542	9.076110208	8.781607751	9.475820364	9.256131581	9.232339427	9.573857816	9.608053746	9.280386892	9.126350579	8.954988987
ILMN_1653180	7.262372237	7.29490028	7.272853594	7.289922647	7.22911856	7.333468832	7.204533191	7.233256889	7.286340129	7.23857527	7.219202675	7.316284141	7.216559751	7.383146421	7.232103218	7.267864449	7.294551039	7.177016741	7.287455483	7.237877516	7.315768501
ILMN_1653182	7.216572606	7.293293782	7.347949465	7.702438044	7.218058093	7.300458862	7.21332947	7.335252305	7.376190493	7.372530312	7.311525889	7.304799515	7.365716451	7.314201354	7.356306262	7.371360951	7.393152574	7.378799099	7.38983381	7.32357932	7.343488839
ILMN_1653185	7.988426686	7.513671065	7.419312167	7.680251114	7.250792336	7.531550301	7.323739966	7.740681561	7.674000342	7.608589221	7.588238664	7.612685541	7.568336077	7.624342279	7.497613355	7.635325791	7.635176824	7.638637587	7.630386017	7.600094059	7.628742992
ILMN_1653189	7.251085583	7.122247249	7.329008338	7.261299331	7.210935943	7.218812458	7.190025306	7.357991909	7.278677349	7.306681329	7.300971278	7.233342751	7.268242785	7.276478704	7.196065803	7.235675026	7.228099568	7.310481553	7.232140292	7.265431582	7.258095293
ILMN_1653193	7.236420503	7.272590379	7.293749262	7.270664911	7.221629406	7.280724751	7.207853703	7.345768955	7.301658941	7.28332966	7.231191197	7.321463	7.279750472	7.310301881	7.277666289	7.304790145	7.271980069	7.306224531	7.235876666	7.268294518	7.289925732
ILMN_1653198	7.210646116	7.310238304	7.304624419	7.352932242	7.162629334	7.349490764	7.201339367	7.293328398	7.366726751	7.366661058	7.27054207	7.387854111	7.305784819	7.354174767	7.286961363	7.325138787	7.302599879	7.464421373	7.351536308	7.239931233	7.444153371
ILMN_1653200	12.52125092	7.983726444	7.777924523	7.694331599	7.871850261	13.47443546	8.152347762	13.11811514	13.50003132	13.15818971	13.27745067	13.31040425	13.25835451	13.08265541	13.21213337	13.12665369	13.77125584	13.34551989	13.06507214	13.61783148	13.72421846
ILMN_1653202	7.26049551	7.324251884	7.273421264	7.23090352	7.223610729	7.348516234	7.196811253	7.34239514	7.312106819	7.332221564	7.324462261	7.315837338	7.284503676	7.317558149	7.306781497	7.416960184	7.271833662	7.320142569	7.434702723	7.350510108	7.349722058
ILMN_1653203	13.25092935	7.264102258	12.3815801	12.71323722	7.200641518	14.41095995	7.206184784	13.1331016	12.88484324	13.00228526	13.65688313	12.6514297	13.58798079	12.63398733	13.46323232	13.30297224	13.7245554	13.5064353	13.47747142	13.83664524	13.68249064
ILMN_1653205	7.899321287	7.442871195	8.750927201	7.915713864	7.900418496	7.649223242	8.159211915	7.470022449	7.566108815	7.487490537	7.495926217	7.541325629	7.427673071	7.636866307	7.555427947	7.537221603	7.503426646	7.53873519	7.491669007	7.549320562	7.589104374
ILMN_1653207	8.290870386	8.9802974	8.711560005	8.165968303	9.764716804	7.636540298	10.58846729	7.705134163	7.637753376	7.545772968	7.541327991	7.613009015	7.549883851	7.592621887	7.576259157	7.589961535	7.60284754	7.621525185	7.49146035	7.577406978	7.513519518
ILMN_1653209	9.314142319	7.285292092	12.2105449	7.377077947	12.21240723	8.297124101	7.210123602	9.244652751	8.358770347	9.511266244	8.616466549	8.916688966	8.669492781	8.708985048	8.947033541	8.686672288	8.965483999	8.761887339	9.406216381	8.257828779	8.432687524
ILMN_1653211	7.243373837	7.29360922	7.289009956	7.23666059	7.200975871	7.261102112	7.198854936	10.03378705	7.257860084	7.627304147	7.239736844	7.545779426	7.187863956	7.235921603	7.240982479	7.192788736	7.236610408	7.28691863	7.333795046	7.29135725	7.204616295
ILMN_1653220	11.85624164	7.309280374	7.420628587	11.86341266	7.22380236	11.91313246	7.214785616	9.283066554	9.561214476	11.29934363	11.48143322	10.95645567	10.9047579	9.913081982	9.293456233	10.72306478	10.56141421	10.08413537	11.11570712	10.97014024	11.13678738
ILMN_1653228	11.22671711	7.811766031	7.788551581	7.651992294	9.480645552	7.686611903	10.67518536	7.569031035	7.468744703	9.468561853	7.581378834	8.97278804	7.897829294	7.571621285	8.365249589	7.630203931	8.69180174	7.49948767	8.43239778	7.511945758	7.501884396
ILMN_1653240	7.541322949	8.081736994	7.663567495	7.721525719	7.227129428	7.451619109	7.326673464	7.520370415	7.466987615	7.487367428	7.402103843	7.53535191	7.451686632	7.497503998	7.458918692	7.487251369	7.428276626	7.433223783	7.532662565	7.465605343	7.540189558
ILMN_1653251	8.397807554	7.290774312	7.341165478	7.253655445	7.219581287	7.590462169	7.204978784	7.648574836	7.409806141	7.871423458	7.881600207	7.627085174	7.507978129	7.241736647	7.833237364	7.661462671	7.554460919	7.468978053	7.493203692	7.500518507	7.624218201
ILMN_1653263	11.58081042	11.77922927	12.18103342	11.01398613	7.178622747	7.895562523	7.154376022	9.561526155	8.577591095	11.15566129	9.789873963	10.48137411	8.416627163	8.485399092	10.38459328	10.30363008	9.792325018	8.169573711	10.40201603	8.608906123	7.817739669
ILMN_1653266	8.793911833	7.341949743	7.392689359	7.286553633	12.52936047	12.06313954	7.211131978	12.97946478	12.97707473	12.53862207	12.46106704	12.66768642	12.61961067	12.76200279	12.73649328	12.80171911	12.67466762	12.23474948	12.60688359	12.64053104	13.05092153
ILMN_1653267	7.25719197	7.295856622	7.297132225	7.242029353	7.220512579	7.42725563	7.207013259	7.494811406	7.413071203	7.413776901	7.28905589	7.421403733	7.395281999	7.408639297	7.413865127	7.257061165	7.376493964	7.365608545	7.303373997	7.543829977	7.377439061
ILMN_1653274	7.448960599	7.438462234	7.304978236	7.264534861	7.222640376	7.370208444	7.204279597	7.39961975	7.445617491	7.338743637	7.359522788	7.395329212	7.373913894	7.433285043	7.254921298	7.322962469	7.381836219	7.30849416	7.263297636	7.276806193	7.310859919
ILMN_1653276	7.546212941	7.352906447	7.359076287	7.431013512	7.217956739	7.436191344	8.438628349	7.573662231	7.483165899	7.451544328	7.508133921	7.420605652	7.45226863	7.456024565	7.472445866	7.510540262	7.441037807	7.478914723	7.415764738	7.422936322	7.454095919
ILMN_1653278	11.4146948	7.271729227	12.22972563	11.75777092	7.216923823	11.06314813	7.213400003	10.44179793	10.94551624	11.14490866	10.02345376	11.03580358	10.9565211	11.39163108	10.33875887	11.54666768	11.19801471	11.46435973	10.43609142	10.3088849	11.19769943
ILMN_1653282	7.391315747	9.035535368	7.345365625	7.334372965	7.226076966	7.33484583	7.214440254	7.362435775	7.358814619	7.270899418	7.316009609	7.358383578	7.342835459	7.307479413	7.455718981	7.310874771	7.301722659	7.308981669	7.502142999	7.378646935	7.369914184
ILMN_1653283	11.68089317	7.221481772	12.0566727	11.82595365	7.19683561	12.56909443	7.199228691	12.64631	12.43977328	12.76370748	12.36536781	12.73368177	12.71695715	12.7614572	12.90336673	13.38930622	13.23962261	12.64205794	13.26062432	12.96217374	12.88431232
ILMN_1653286	7.351047244	7.279914081	7.34240109	7.341957974	7.185220252	7.311117288	7.786154268	7.383890051	7.385711951	7.382223376	7.382759265	7.573136794	7.363113669	7.429671243	7.371907114	7.435049244	7.443235963	7.434703775	7.395314375	7.334773226	7.506358257
ILMN_1653292	7.200829726	7.215528333	7.136200425	7.217528888	7.18688795	10.4741827	7.191673214	9.444782481	8.373056706	10.13552906	10.79359698	7.165039312	10.12766774	8.669167819	10.34459143	10.69710073	9.727707654	9.171725274	10.27222638	10.14824467	10.42286183
ILMN_1653310	12.00110521	13.65885086	13.22306735	12.45511109	14.0023803	8.606460009	13.78696044	9.066571159	8.954915883	8.704395087	9.723770592	9.878559776	8.910740171	8.901999693	8.76953307	9.086741501	8.503605095	8.83311043	9.305596105	8.519964481	7.660892545
ILMN_1653314	7.520020013	7.510464904	8.049551868	7.526128718	8.564302047	7.439500651	7.622509777	7.311247495	7.375250243	7.404777162	7.370839728	7.344379086	7.320443819	7.355092762	7.343436286	7.468896932	7.332872274	7.395134533	7.329624418	7.331556793	7.342792531
ILMN_1653319	12.30058814	11.52955763	12.00940108	11.87752415	11.57390793	12.98414015	11.90248902	12.50566483	12.58497938	12.09989071	12.47939715	12.02931594	12.96714545	12.44717011	12.72587174	12.35626095	12.61198975	12.78336457	12.30851892	12.49571921	12.51963265
ILMN_1653324	7.290478005	7.280509886	7.355867415	7.321102761	7.220552698	7.272328626	7.204454423	7.339144705	7.290522533	7.319497824	7.240803158	7.249890873	7.215922352	7.293704429	7.287436367	7.323938255	7.222962956	7.248894432	7.771179345	7.42624523	7.278300211
ILMN_1653332	7.330490884	7.480312466	7.286251701	7.261582293	7.224885943	7.577432982	7.287348613	7.353021346	7.434486823	7.51084944	7.491563396	7.446999778	7.514637716	7.559878509	7.481255202	7.318865555	7.597163345	7.492864653	7.672497221	7.632055348	7.845722678
ILMN_1653337	9.212979797	7.268733266	7.266334835	10.97932613	12.37008192	9.248364985	7.214620633	9.118030209	9.111437213	10.34826145	9.812801165	10.07586258	10.18416712	10.56404835	10.05000638	10.1472133	10.07929991	9.720354621	9.844393395	9.441390137	9.360176644
ILMN_1653340	11.82803872	12.0561948	11.82659281	11.93921311	12.93930903	11.09444263	12.73626284	10.16962198	9.968421696	10.010596	10.72169354	9.863086709	10.92534953	10.83844271	10.40806134	9.811916246	10.38049438	10.65545781	10.71794894	10.62029252	11.00995818
ILMN_1653342	11.90570666	12.43372141	7.78973794	12.11575209	7.674839932	10.98910645	7.214518899	9.439024663	9.595559887	10.3716879	10.65597677	9.996435304	10.02687083	10.36124167	9.910387875	11.06250633	10.10934181	10.30047288	8.483881593	9.665390325	10.13798299
ILMN_1653347	7.228540414	7.274782728	7.329702111	7.368440247	7.22298064	7.304499266	7.190524163	7.330460351	7.396606238	7.323651917	7.352929283	7.294774153	7.288261755	7.373616252	7.273269881	7.282653935	7.375893703	7.249802849	7.336140982	7.290347394	7.312647085
ILMN_1653352	7.221579673	7.292331491	7.354311024	7.263026598	7.226328948	7.320951041	7.191343455	7.28233641	7.230498742	7.31293076	7.330927611	7.127819007	7.240704785	7.245243086	7.250801582	7.307414036	7.269905078	7.339786315	7.287942901	7.239710145	7.278866416
ILMN_1653355	7.47032135	8.555492782	8.269535518	7.633457134	7.393081588	7.470476168	7.595709477	7.442246685	7.544064203	7.487213907	7.398708816	7.46913487	7.49076661	7.475495942	7.380875047	7.371354139	7.464215104	7.473632311	7.364227028	7.382263636	7.402526642
ILMN_1653358	7.251490248	7.30327522	7.328240788	7.301678549	7.201602651	11.34035183	7.190424869	12.44937503	12.05314484	11.94144625	11.58208713	12.63903207	11.77878883	12.18069132	11.61806942	11.99158926	11.97931738	12.76435138	10.04261042	12.29435243	12.46501673
ILMN_1653367	11.45794128	7.294046965	7.342559725	7.311336352	7.215258525	10.3954256	7.212991278	7.382024424	7.601997477	10.96086601	11.13330414	9.371598564	10.50435016	9.814281812	10.55088467	9.465096387	10.48533847	9.78204934	11.02735579	10.00994642	9.859358435
ILMN_1653368	7.224814802	7.279609515	7.241008778	7.24292457	7.214466265	7.230630291	7.200893133	7.229663449	7.276919587	7.338445015	7.30545671	7.249437421	7.155464917	7.24476712	7.270207476	7.251427841	7.339440024	7.368169162	7.262158558	7.282044994	7.231917337
ILMN_1653369	7.431492241	7.30195375	7.39341479	7.318951562	7.214439535	7.433751339	7.248413648	7.404550921	7.538889746	7.547414002	7.444247988	7.484932562	7.446554272	7.538284208	7.427958272	7.421075822	7.449733018	7.398810122	7.482415545	7.486219942	7.386368293
ILMN_1653372	7.206543277	7.267546276	7.258700428	7.283037543	7.215115983	7.83906064	7.13277889	7.294902503	7.216953617	7.162693749	8.066920056	7.241535023	7.254393818	7.238045041	7.230405941	7.220071026	7.27696972	7.227739307	7.306368082	7.230459656	7.498511764
ILMN_1653376	7.465057257	7.178884433	7.292284549	7.391097471	7.199696381	9.61668981	7.200141124	7.856638296	7.345537545	7.35696057	8.630706519	7.33040584	10.00165643	9.964997251	9.177596263	7.327453973	8.557668343	9.955165938	9.102279543	10.00653219	10.17700842
ILMN_1653378	7.419326102	7.486871962	7.806177429	7.387711884	7.225708062	7.442683811	7.807036511	7.487955982	7.446106748	7.479456116	7.45625245	7.436011925	7.440926043	7.547390944	7.471521927	7.362612195	7.535264928	7.521655536	7.445990553	7.4100008	7.429182251
ILMN_1653385	7.209621854	7.210385311	7.270724382	7.216918431	7.174866027	7.793219428	7.189368936	7.872574654	8.010324879	7.45378739	7.627430034	7.762053137	7.971356531	8.803776877	8.102469227	8.239625471	8.160375799	8.101113941	8.335817641	8.264728684	8.118531045
ILMN_1653386	7.791950169	7.960857481	7.788476079	7.693825056	7.600083867	7.547067618	8.745216902	7.691454617	7.606657254	7.542406812	7.444670993	7.477988266	7.49976246	7.592948825	7.566747821	7.561257229	7.592198099	7.519027866	7.565829336	7.587651249	7.479054359
ILMN_1653390	8.979353543	11.42091566	11.80241299	9.168925458	11.57705065	7.902102338	11.91924831	8.175108836	8.184173425	8.060556163	7.904414042	7.973075674	7.965483849	8.066885366	7.868727303	8.027040411	7.904476531	7.855746759	7.906256815	7.871849297	7.934181616
ILMN_1653394	7.452549923	7.330725605	7.340813791	7.350086445	7.44310263	7.319497352	7.389623194	7.430039397	7.279755012	7.356450664	7.382123195	7.417619023	7.360615382	7.405903481	7.371977421	7.397678488	7.39430528	7.390743406	7.44964016	7.389074645	7.297122246
ILMN_1653395	7.337309983	7.277661294	7.239111632	7.289707722	7.223730452	7.239487229	7.196039092	7.26745256	7.267043584	7.246194008	7.287808368	7.309452887	7.293300779	7.273147335	7.236904836	7.212121997	7.259232246	7.249845614	7.302799054	7.287696214	7.231968203
ILMN_1653404	11.40686637	11.89484956	7.197888137	11.7264905	7.213882056	11.83164197	7.192657326	11.85321243	11.98534651	12.39406998	12.84565522	12.46999691	12.08784296	12.07201074	12.60377874	11.96401075	12.58671449	12.36266567	12.64238742	12.21040274	12.31480125
ILMN_1653410	7.577596418	7.541056508	7.783477852	7.596806887	7.316856281	7.46893496	8.761447014	7.44936734	7.40962329	7.379279514	7.460275343	7.459638765	7.458973642	7.494498086	7.431186534	7.418465439	7.457493829	7.439072302	7.45932338	7.376679192	7.469261052
ILMN_1653412	10.18577081	11.87790141	11.87167485	11.00164259	12.17181462	8.467706274	12.41233252	9.284705048	9.366300383	9.444248933	8.706827994	9.101313683	8.830008519	9.114696692	8.937494484	9.853191812	9.122407644	9.385947856	9.141814427	8.666113017	8.538191117
ILMN_1653415	7.387035836	7.44011243	7.512323854	7.355347381	7.22235241	7.337397363	7.213062033	7.498215243	7.44330627	7.419304074	7.444576597	7.462593962	7.347392036	7.4148962	7.40517854	7.460914116	7.486069293	7.534724446	7.36813378	7.404238854	7.409940731
ILMN_1653420	7.246271478	7.277322018	7.265002975	7.216001466	7.210938411	7.230260487	7.212362163	7.283060981	7.27191491	7.358394466	7.238550229	7.260390857	7.325715405	7.305854356	7.385692693	7.310298666	7.262672222	7.236547045	7.293364373	7.273345215	7.311740475
ILMN_1653428	7.212716609	7.239402278	7.298558543	7.2402917	7.166638131	7.438250467	7.192060494	7.162278703	8.442216147	7.222960896	8.225456832	7.177356918	7.241511081	7.228716188	7.207127429	7.27078199	7.266579206	7.220157795	7.218876009	7.629662208	7.628603577
ILMN_1653429	9.293641863	7.269363692	7.221302572	10.21396623	12.16411393	9.918594728	7.208181067	9.790025248	9.894652487	9.681318725	9.934851902	10.48550715	9.754459152	10.76435996	10.01975939	10.58986469	9.756618786	10.23657806	10.60767423	10.25804337	10.22923387
ILMN_1653432	12.17093044	7.259462027	7.13850942	12.25192084	7.182407984	12.42209842	7.181787163	12.74862823	12.6659344	12.85807049	13.21841789	12.91439782	13.08160989	13.01010678	12.97571712	12.97322242	13.12509529	12.92877039	13.50353549	13.06920326	13.17485273
ILMN_1653434	9.171753449	7.90209594	7.328639341	11.81067907	7.227230315	10.20569894	7.204591524	11.99158972	10.43999771	9.016027466	9.937586572	10.83796435	10.61622739	11.05717367	10.11243327	7.965391444	9.246173623	9.920987796	11.20014476	9.605129701	9.828668738
ILMN_1653437	7.464237847	7.364652271	7.327346659	7.303257484	7.257968189	7.26724438	7.238957221	7.299384908	7.33999276	7.431693053	7.349872204	7.414043333	7.274412812	7.416745655	7.322103699	7.388562604	7.328891404	7.401213887	7.396518609	7.236712099	7.31375214
ILMN_1653438	7.700015681	7.261549959	7.391593109	7.228887273	7.220686071	7.385157699	7.207768779	7.417397493	7.338883496	7.572119008	7.417664516	7.494193612	7.503336476	7.414136317	7.33896506	7.504570289	7.610927599	7.414751263	7.501530138	7.482316299	7.631381263
ILMN_1653443	10.96295336	7.316466638	7.353622862	11.70601173	7.967927785	9.481713735	7.21220197	7.425086878	8.642874653	8.904611661	9.549544521	8.649150806	9.113326386	8.761824946	9.170684691	8.572636311	8.875479352	8.82813913	9.107331101	8.967914579	8.674695322
ILMN_1653447	7.519548358	12.43301809	12.8587331	7.699257134	9.269582712	8.487932648	9.040951884	7.427721099	7.544924992	7.545793931	8.149192869	7.55970304	7.96112304	7.414093219	7.578811588	7.782802644	7.643999371	8.507845052	7.514861556	7.887355616	7.548335691
ILMN_1653453	7.556659813	7.296634728	7.265097333	7.321297831	7.226847435	7.521688106	7.212488459	7.555507855	7.511132712	7.459887161	7.575911693	7.47930596	7.503562844	7.418848171	7.484285868	7.476198316	7.546782193	7.512361194	7.546155275	7.549349113	7.509715882
ILMN_1653458	7.255029694	7.26655799	7.341260841	7.234601182	7.20096477	7.559342456	7.243253085	7.359911364	7.386981184	7.438915455	7.480211838	7.265447431	7.531981584	7.393708125	7.35812507	7.27671563	7.280325266	7.38392753	7.366984178	7.416301522	7.453551926
ILMN_1653459	12.46113101	12.32798835	12.52463206	12.20610167	12.73804725	10.82690375	12.80932076	11.37332736	10.72651255	11.59851734	10.39189211	10.98366672	10.96138816	10.11061894	11.06733231	11.40089447	11.02189114	11.27061263	10.66825869	10.79384729	10.49339609
ILMN_1653461	7.60880488	7.482989042	7.2953478	8.019461538	7.505566385	7.504400137	7.214125373	7.530593727	7.386741705	7.586845318	7.492446064	7.495831315	7.549761826	7.467853072	7.434342686	7.366839204	7.535970263	7.701444996	7.652648249	7.548646701	7.590218154
ILMN_1653463	7.416239531	7.300674366	7.333417866	7.231400108	7.744692756	7.434404153	7.227506032	7.296940372	8.191292507	7.306814238	7.645174858	7.29339148	7.690401109	7.510365945	7.315831593	7.322828188	7.285583735	7.967866558	7.39171722	7.290021447	7.548314103
ILMN_1653466	14.23457174	12.5375275	13.35108861	13.9960023	7.221509797	14.52440924	12.97199112	14.04253804	14.19603333	14.21717873	14.46814235	14.04022123	14.14725139	13.75491783	14.27372395	14.29989904	14.14927982	14.31627344	14.52906202	14.43333022	14.10567543
ILMN_1653468	8.866708377	11.53680201	10.40565914	9.100501443	11.58512039	7.702958934	11.90260346	7.431790876	7.500613334	7.410538715	7.465903963	7.576207006	7.374510423	7.565998195	7.507957289	7.421066514	7.522531668	7.492031716	7.392273543	7.679491225	7.571265298
ILMN_1653469	7.582093458	7.293377079	7.59970711	7.770324358	7.215315299	7.543455639	7.281104397	7.593307704	7.636432745	7.617978317	7.526044309	7.497453998	7.501541573	7.638581103	7.594352543	7.683653837	7.538553624	7.578819711	7.584597243	7.533757707	7.547703081
ILMN_1653470	8.527253956	8.099877172	7.409624279	8.001659358	7.264294094	7.753250121	7.210529272	8.029950116	8.166699122	8.031321074	8.012593509	8.289654977	8.285514638	7.976735426	8.131457389	8.066562152	8.016382092	7.919686965	7.800174151	7.916468197	7.868320513
ILMN_1653471	7.286457945	7.264174626	7.284537285	7.24132909	7.184429653	7.283488659	7.213439998	7.250300366	7.26479962	7.273859364	7.313368204	7.315829372	7.282012176	7.335503522	7.305322732	7.348157012	7.265844452	7.357091451	7.329494165	7.263113946	7.235187443
ILMN_1653480	8.113241481	7.646345341	10.84448596	8.264124873	7.227957703	8.207732227	7.211966807	8.124851328	8.251593087	7.835329297	7.988870301	8.164865404	7.982756498	8.210852847	8.060336696	8.799503116	7.949753356	8.25270973	8.063697574	8.055191038	8.138986938
ILMN_1653494	11.95632061	12.0898287	12.15041522	12.87982705	7.215373937	11.27862992	12.31131363	14.25368556	12.48906617	13.45790437	12.66445486	13.11899786	10.95336951	11.69270833	13.02691575	12.66908935	13.69269737	12.86176466	13.77978974	13.00679872	11.55679695
ILMN_1653496	7.223953983	7.271759365	7.357945823	7.367280221	7.220694087	8.884299899	7.23508071	8.107567759	9.396945433	7.297100416	8.731335965	8.868724873	8.469159583	10.42531809	7.54455001	7.265076296	8.738064466	8.970558366	9.986828455	9.407564064	10.15116667
ILMN_1653498	9.090762792	7.293765475	9.687226474	9.764595793	7.214410995	8.451268202	7.210689262	8.723269713	9.028692768	9.48582843	8.99164148	8.780257494	8.49795689	8.533254537	8.814360867	8.972739095	8.669051689	8.502683962	8.704322402	8.465783491	8.068428191
ILMN_1653500	7.279349327	7.297895988	7.41410211	7.283640388	7.333359915	7.369619655	7.279528572	7.314092007	7.321784779	7.35814182	7.385358057	7.319287468	7.361583061	7.285782634	7.375691821	7.424949135	7.28683449	7.281321042	7.365415087	7.342899884	7.373731399
ILMN_1653501	13.15752796	12.11949613	7.205599506	12.78592954	7.191948508	14.26800373	7.182772296	13.08340158	12.95565545	12.75624554	13.32035712	13.02763792	13.90221059	13.49304696	12.97087779	13.12062024	13.32936764	13.28835274	12.76512597	14.13675006	14.02733736
ILMN_1653504	12.40754109	12.12728434	12.68903373	12.1634049	10.85325939	11.06193996	12.65256272	11.09800701	11.32814782	10.94803015	10.98363082	10.99980666	10.49051819	11.02612191	10.32852795	11.36197536	10.57361145	10.60966809	11.01020499	10.4825564	10.69774854
ILMN_1653506	7.204789355	7.213271001	7.236499115	7.247673836	7.208225641	7.239972919	7.193268093	7.220744032	7.300223444	7.171010114	7.246266612	7.235762383	7.392954041	7.239950322	7.214243259	7.194815264	7.19510569	7.29617441	7.202124893	7.237975245	7.353172764
ILMN_1653514	7.911647806	9.844107876	10.84791911	7.907401179	8.324428383	7.626927517	8.141369491	7.807962937	7.645919982	7.699949178	7.509705442	7.547959933	7.55414713	7.632162232	7.702186458	7.558347289	7.602767261	7.547693483	7.536127653	7.535807463	7.464737665
ILMN_1653524	7.335336847	7.296863578	7.29866459	7.228518124	7.208624244	11.59146477	7.210675583	12.58114644	12.59419139	11.59023915	12.29321485	12.04465277	12.30633726	12.62309799	12.68564478	11.82408395	12.39985164	12.68937861	12.65899919	12.99542678	13.29358773
ILMN_1653527	7.798144125	7.271156568	7.593293906	7.875195701	8.323020123	7.454963423	7.21096125	7.399422592	7.554715015	7.510797553	7.509100978	7.497950657	7.473159697	7.471775508	7.452405347	7.447512866	7.448871282	7.457945937	7.580840044	7.471670345	7.466131479
ILMN_1653529	7.279842842	7.327467517	7.334367108	7.290277454	7.316288431	7.541149156	7.182750684	7.567842511	7.556806828	7.554302185	7.583421809	7.562890671	7.657149099	7.571041025	8.873709551	7.482707938	7.576088185	7.533883477	7.569684958	7.594826131	8.016245847
ILMN_1653553	12.88828211	13.10310685	13.04015228	13.11421876	13.61673785	13.13325068	12.91256957	11.74973861	12.01686034	11.76386115	12.60987734	11.52190994	13.02541283	10.67557731	11.21044745	11.11388746	12.11668838	12.54295147	11.42502519	12.57175942	12.79799906
ILMN_1653562	7.245175429	7.232670674	7.344783659	7.285953261	7.22806605	7.245409205	7.205302318	7.255776187	7.310611028	7.237648054	7.158288819	7.197290284	7.419913201	7.256471804	7.283577479	7.335149432	7.192374161	7.323834129	7.214403776	7.301961203	7.130484312
ILMN_1653566	7.221607071	7.18343725	7.346971317	7.238797415	7.227751915	7.241974415	7.252002752	7.253955987	7.276276106	7.353652668	7.265727376	7.391360177	7.191046564	7.235295777	7.236005399	7.188862224	7.239823876	7.26008336	7.256958813	7.314117243	7.284343673
ILMN_1653567	7.403429091	7.297017495	7.315535176	7.240180651	7.205834936	7.447261528	7.212520608	7.396476232	7.406896913	7.350229758	7.331673713	7.468140221	7.42081836	7.431129293	7.367386905	7.364872845	7.373672503	7.423082616	7.269397753	7.439026051	7.396076444
ILMN_1653572	7.223623496	7.28444694	7.307545294	7.328778255	7.227049407	7.320192112	7.271601146	7.340202069	7.303833588	7.333933838	7.337028986	7.288472914	7.230350119	7.252239476	7.23861934	7.366392503	7.281964227	7.343703713	7.307255733	7.307127057	7.297516041
ILMN_1653573	7.30879896	7.288897572	7.345672159	7.249624619	7.301250141	7.429482495	7.20873876	7.500429065	7.561285624	7.454599718	7.44803751	7.561890059	7.488943046	7.561809042	7.578758609	7.568576029	7.592965504	7.533179593	7.486315848	7.575691066	7.443819803
ILMN_1653575	7.281548499	7.545846366	7.428794576	7.623440877	7.698876599	7.431356786	7.839737611	7.487424092	7.47954154	7.563867443	7.426108543	7.462377721	7.449952422	7.478500602	7.478088746	7.451980657	7.447819768	7.423021275	7.399222325	7.445468936	7.462295577
ILMN_1653577	7.832519662	7.281596174	7.30816522	7.463141281	7.410835242	7.41651564	7.308626259	7.353986452	7.444603846	7.395789995	7.305363229	7.473971646	7.357069167	7.371471607	7.362393911	7.468260232	7.44322686	7.404874086	7.420003969	7.404879323	7.390156266
ILMN_1653578	13.26107184	7.284690743	13.15059657	12.47049472	7.331761086	12.50650671	7.20502126	13.26283107	13.57457373	13.77070815	13.8588213	13.24256923	13.42781613	13.1805692	13.64964277	12.85546535	12.96760668	12.98276486	13.83887448	13.03892335	13.33684024
ILMN_1653579	7.242715678	7.29608416	7.329995639	7.520081311	9.61484446	7.444656805	7.224035646	7.368774499	7.471978461	7.383098341	7.389808513	7.388739938	7.397016069	7.438034885	7.418484812	7.408509936	7.390409624	7.381420606	7.301068195	7.399206089	7.418735338
ILMN_1653583	7.208310059	7.291036081	7.371764393	7.275901525	7.313104053	7.292245293	7.231062811	7.239856378	7.267041478	7.221015234	7.247797275	7.310795983	7.164454222	7.231649058	7.326728598	7.260123338	7.317929882	7.283349041	7.154262688	7.1835845	7.28513436
ILMN_1653591	7.233329779	7.275411345	7.345527509	7.255798018	7.219506223	7.439356319	7.203325538	9.003822548	7.317853421	7.333089063	8.708319968	9.255691835	7.304253251	7.329453954	8.078300609	7.356880148	8.655271758	8.504702841	7.253507493	8.016076681	7.226661635
ILMN_1653599	14.80245806	14.00710887	14.1116394	14.59070396	8.6330759	14.97511764	12.98044085	14.47415938	14.08356698	14.34679018	14.22504788	14.32334182	14.57890298	14.5721254	14.37799666	14.22046326	14.36637251	14.34592723	14.2905273	14.58220916	14.49712554
ILMN_1653601	7.389446732	7.441677831	7.40631481	7.534674469	7.224186755	7.45134177	7.260729348	7.492610976	7.482755127	7.45615178	7.451463671	7.439457434	7.464684283	7.411451884	7.500384511	7.500242703	7.587016177	7.384572855	7.393935845	7.459850137	7.5266541
ILMN_1653603	7.379422479	8.53366285	7.810274601	7.732888278	7.228022665	7.511785296	7.438488192	7.766131935	7.643893812	7.500630647	7.481657946	7.495217768	7.605342842	7.503213335	7.410345756	7.53816758	7.490466286	7.578753871	7.615467165	7.563800119	7.481830211
ILMN_1653607	7.247100053	7.412477265	7.348543899	7.256191024	7.257742141	7.323668387	7.208102602	7.320420908	7.311287445	7.431090699	7.28527227	7.342088572	7.22767695	7.2841735	7.305331324	7.347139741	7.343495936	7.27884015	7.35475542	7.31476715	7.347041949
ILMN_1653612	8.614203896	7.29253729	7.352882426	11.15260621	7.221692578	11.85457365	12.15170469	9.579682871	9.492887867	9.178234239	9.272591186	8.924019941	9.942866478	9.718551249	9.584189689	9.479781652	9.47838097	9.796753959	9.235601837	10.59469671	11.16682879
ILMN_1653613	11.60853628	12.21437544	7.528770323	7.595935047	12.97432908	11.64563118	7.238453605	12.85784459	13.1309746	13.19506999	12.73176298	13.03217175	12.69148139	12.99267161	13.02645124	13.13659305	12.91667147	12.77503874	12.66749024	12.23137899	12.50027589
ILMN_1653615	7.359626695	7.297941501	7.469394727	7.314077626	9.47593701	7.317322365	7.228247227	7.307416154	7.344616134	7.259359328	7.262246884	7.365614326	7.332246915	7.383843624	7.206364206	7.371519426	7.36090472	7.281088082	7.299130984	7.312570904	7.244104794
ILMN_1653618	7.464641907	7.284831016	7.351568143	7.518874665	7.956896845	11.0768617	7.23070479	10.45970032	10.76505108	10.08637264	10.90313476	10.83230116	11.6199017	10.68940488	10.760547	8.973360861	10.90645254	10.93212814	11.1373402	11.82650597	12.05310298
ILMN_1653622	8.107353883	8.959392607	9.665604252	8.136705155	9.904437378	7.650652874	10.96285264	7.707632476	7.643378579	7.702007701	7.585860982	7.681614575	7.519157172	7.658229952	7.626075376	7.680297521	7.647715399	7.668579692	7.629208769	7.645130749	7.693192861
ILMN_1653628	7.21373322	7.287111174	7.326358008	7.22103152	7.210218128	7.253325335	11.40668196	7.366488489	7.292071507	7.179400117	7.235647983	7.447133473	7.275767801	7.524035782	7.257611673	7.351710187	7.24039503	7.17798063	7.166080949	7.224418209	7.318811534
ILMN_1653636	7.255366712	7.260510463	7.186655903	7.317132909	7.226878795	7.341667886	7.20962474	7.235693055	7.29745927	7.132636257	7.31472027	7.262800281	7.278496501	7.337242969	7.251937709	7.389708979	7.237923078	7.347754771	7.297645575	7.303691673	7.257235132
ILMN_1653646	14.01278201	13.23798847	13.18218414	13.69526898	13.45106667	12.94211409	13.32184287	13.61908808	13.42619441	13.38293393	13.29248553	13.29189772	13.0971492	13.01523743	13.15655162	12.66910028	13.20551886	13.07496443	13.57307919	12.68558773	12.55530654
ILMN_1653648	7.275799324	7.287838777	7.216597074	7.4430552	7.228456561	9.495352354	7.210394588	10.43710915	10.84293243	11.16817288	10.0589771	9.710812442	11.1687104	11.56794106	10.22170041	9.891648265	10.16010649	9.226721018	9.935221198	9.547892142	9.159487443
ILMN_1653650	7.521472829	7.804995441	7.546423193	7.775162365	7.837048211	7.536896806	8.171259051	7.529342979	7.556332465	7.357734049	7.462868705	7.478101781	7.535580575	7.508607206	7.41550661	7.39673518	7.481706719	7.479892929	7.475347432	7.484768493	7.424252633
ILMN_1653652	11.16420488	7.291783971	7.324902711	11.80851084	7.213665886	10.70817076	7.183017846	11.55557838	11.29475442	12.08986157	12.18379444	10.96312983	11.56199797	10.07275707	12.26403531	11.74399786	11.53998647	11.12767503	10.91995676	11.16920924	12.16930174
ILMN_1653660	7.275677304	7.288744315	7.426306968	7.591630017	7.189678422	7.447188528	7.206346103	7.320626927	7.404391244	7.498434932	7.353454617	7.466981268	7.414297748	7.397927144	7.507377086	7.423145074	7.436347057	7.440365962	7.432980062	7.431284844	7.438494585
ILMN_1653665	7.342621812	7.282061091	7.301533776	7.309237104	7.205350843	7.300725948	7.226819532	9.363756885	7.384482904	7.671588437	7.43675727	7.582342925	7.507161612	7.359713762	7.341286124	7.328086903	7.313756561	7.24413697	7.44819833	7.33865616	7.334159958
ILMN_1653666	7.544753465	7.297766698	7.321990453	7.341268897	7.231605682	7.478563613	7.206386062	7.48551255	7.524845453	7.489985689	7.396806932	7.439440008	7.567494678	7.72903719	7.895183467	7.623234499	7.766309923	7.545180305	7.565212783	7.683322537	7.620294835
ILMN_1653667	7.367714364	7.773666307	7.259763283	7.618656402	7.222503582	7.408966805	7.211694755	7.38369507	7.492617942	7.580979612	7.441933741	7.486994194	7.489262874	7.623572586	7.432479896	7.492141512	7.40578885	7.425325507	7.491896691	7.357680817	7.406937764
ILMN_1653670	7.228711194	7.295667791	7.24322474	7.230214024	7.211618585	7.707638857	7.205750344	8.881380572	9.33939368	8.078877948	9.847234964	9.318268699	9.252689323	9.550854684	9.584637279	7.694352239	8.587853316	9.214909096	9.131714544	9.631337684	9.774262786
ILMN_1653678	7.459438512	7.2883838	7.331728731	7.245436421	7.372846822	7.340197907	7.212977169	7.329716939	7.328002137	7.245558979	7.206094692	7.310316801	7.281080907	7.344398321	7.297948881	7.27917212	7.264902222	7.349473049	7.397441808	7.288717561	7.367156188
ILMN_1653687	11.24368329	7.302383455	7.403653794	7.852235766	7.22503736	12.35558197	12.55220962	12.02060019	11.98463029	11.4238357	10.89404169	11.06211009	11.84261662	11.34047918	11.33339304	10.88205231	10.86495267	12.2670834	11.30726864	12.03922435	10.97161495
ILMN_1653704	7.35586053	7.225683377	7.348067488	7.326263155	7.406640483	7.413767656	7.262721713	7.34507483	7.343806093	7.271119917	7.308554095	7.345879468	7.419602606	7.439315981	7.426157548	7.521807567	7.322277318	7.380589043	7.349194804	7.351990717	7.363844881
ILMN_1653708	13.67155415	13.627933	13.31534572	13.38552835	7.146349353	13.37545875	7.16954838	12.76410556	12.61861938	12.94798307	12.87470117	12.91316787	12.67041986	12.3426267	12.74176906	13.52942512	13.0439907	12.89413037	12.86804723	12.65773462	12.57063499
ILMN_1653709	11.96362344	7.297753305	7.437128323	11.90462214	7.237588408	12.18736918	7.212807242	11.9869224	11.43726352	11.00586488	12.25733502	11.93422847	11.99724495	12.22194889	11.99369132	11.75584345	12.45963759	12.06348839	12.38677738	12.34653671	12.17509824
ILMN_1653711	7.200809413	7.205544153	7.137683514	7.223904007	7.196713841	9.36242275	7.152569618	7.210634104	9.108240961	10.83169091	8.930591938	7.155497701	9.372504569	9.689773782	8.393675558	7.120526336	8.326043187	8.367733483	9.948285726	8.292411767	8.177666239
ILMN_1653712	11.43881148	9.735731777	10.78174695	11.71586825	7.227437633	11.54880695	7.215021028	11.62273045	12.50100555	11.57998025	12.15287007	12.25862688	12.12877242	11.8964536	12.03398045	10.63520563	12.20538939	12.64208333	11.62897383	12.70115848	12.41959183
ILMN_1653716	7.83339797	7.298338877	7.274920396	7.324202809	7.22088405	7.27876441	7.20312391	7.309440417	7.325691337	7.31252749	7.408224335	7.351024929	7.365294135	7.26084433	7.307642271	7.242731587	7.31415273	7.454387843	7.296529668	7.241868327	7.361127076
ILMN_1653718	11.61083009	11.7931436	7.315253987	11.72397707	7.222126833	12.45414977	7.20298374	10.07626375	10.37693694	9.199477416	10.67344917	10.91249629	10.92659347	10.27388028	11.44023127	11.41622717	10.90339908	11.3814471	8.435313439	11.77599033	11.31783146
ILMN_1653719	7.561540822	7.303458539	7.476230819	8.073201402	7.218534148	7.613031371	9.458419999	7.599737132	7.802748439	7.566343361	7.630579453	7.829504923	7.916802596	7.635743407	7.884642474	7.939595392	7.754952132	7.811164842	8.084582489	7.550152734	7.634859751
ILMN_1653724	7.82173186	8.205048863	8.086954497	7.688108233	7.40206822	7.398017353	8.006020686	7.412513795	7.35057626	7.501221033	7.405501946	7.422190787	7.443748384	7.402938837	7.379523595	7.423782822	7.418675546	7.365652253	7.406615225	7.427009433	7.340393769
ILMN_1653728	7.469606788	7.272542742	7.349131538	7.508697819	7.279974926	7.564707219	7.20603693	7.473759597	7.292255861	7.347920601	7.344687126	7.38586054	7.439637016	7.364607816	7.401361487	7.395359341	7.419306693	7.427696772	7.430781106	7.445066991	7.476333876
ILMN_1653730	12.33161038	7.279547072	7.207036412	12.36106649	7.206294121	13.10058082	7.194968587	11.21503736	11.32964884	12.52542361	13.09176705	12.26000602	12.89511571	12.28449655	11.97864898	12.45263176	12.41582557	11.6551112	12.58740261	11.82170096	12.13780438
ILMN_1653738	7.413870474	7.367713215	7.347614782	7.259947888	7.445914564	7.667464911	7.21465078	7.733628813	7.789070779	7.732660831	7.819647922	7.650961581	7.679117928	7.880408718	7.788585148	7.935548071	7.667709329	7.736185761	7.78836024	7.763006186	7.735318444
ILMN_1653742	7.622325907	10.02170007	7.868298843	7.995864065	11.25069241	7.501763604	11.01508777	7.575286036	7.501776402	7.501892857	7.414848245	7.499177977	7.448270455	7.543190632	7.491097774	7.532775355	7.511310037	7.493832614	7.424383635	7.516991164	7.514598507
ILMN_1653744	7.200908679	7.292122595	7.343615855	7.326259562	7.438986264	7.285641989	7.371058727	7.300462162	7.244765382	7.355798626	7.305408255	7.259943407	7.39918981	7.261346675	7.29182688	7.399447225	7.319363435	7.20577164	7.27898269	7.321967794	7.377239509
ILMN_1653745	7.302157314	7.32427261	7.359406424	7.489488834	7.227381305	7.308247167	7.608546203	7.380753291	7.355683401	7.355644217	7.325600187	7.40171552	7.375078353	7.433166091	7.325364082	7.28649104	7.39240546	7.368532971	7.471070127	7.271740232	7.267903759
ILMN_1653748	7.335637839	7.333586217	7.386582739	7.482316495	7.305025801	7.52300484	7.209272622	7.440367227	7.437902392	7.480102608	7.420234782	7.365176718	7.390347958	7.360904581	7.419597454	7.520252665	7.453873833	7.379565219	7.430665425	7.463911314	7.421450656
ILMN_1653750	8.170496058	7.257902008	7.341181499	7.300466991	7.188299077	7.894454256	7.165724431	7.606949837	7.752499994	7.7521574	7.5409076	7.110525847	8.322602538	7.644123103	7.586070532	7.176564802	7.860124678	7.862310111	7.584043146	7.796924613	7.914294887
ILMN_1653760	7.239257981	7.756592025	7.256144286	7.273385046	7.293594603	7.302990496	7.192887025	7.294338073	7.354340616	7.260435512	7.295297859	7.245795214	7.311761863	7.267557241	7.261467772	7.341391794	7.204963811	7.212196739	7.30047286	7.307608363	7.262587266
ILMN_1653761	12.52982753	13.80343508	13.26086001	12.22306026	13.96843437	11.21216518	13.78628624	11.17293003	11.84003864	11.51370151	10.26876152	11.86719721	10.94313098	11.93284668	10.09295591	9.528826773	9.435941802	12.16271772	9.959135377	11.19876322	10.8005903
ILMN_1653762	7.207801843	11.54162605	7.161929529	7.217476069	7.200703748	7.368644324	7.187259146	7.242356193	7.244321584	7.228048468	7.266702812	7.967527825	7.483672087	8.458530109	7.58585577	7.822661731	7.765589915	7.390887168	7.99987711	7.538377255	7.326427748
ILMN_1653766	7.255838956	7.298170363	7.510208983	7.483392011	8.234379991	8.018612924	7.47892848	7.904578363	7.42425951	10.36944654	8.280608086	7.391401814	10.08142354	9.655492629	9.392567567	10.79770532	7.421533045	7.381123714	9.195636388	9.798034044	7.404302258
ILMN_1653768	7.203785535	7.21517597	7.232629139	7.215514036	7.188976791	7.29716362	7.174939654	7.21730787	7.231946439	7.27698298	7.271162618	7.231526725	7.313233174	7.180263684	7.252488055	7.189291584	7.214892481	7.27707805	7.257379339	7.290028974	7.241624469
ILMN_1653771	7.57344768	7.29477218	7.988493733	7.657177488	7.211995858	7.450171396	7.211874142	7.506600497	7.327766786	7.554991543	7.414927207	7.515731597	7.440093345	7.457669159	7.541915755	7.488591567	7.461775832	7.521121216	7.473644531	7.55658575	7.512065595
ILMN_1653783	7.440759965	7.288675692	7.35093856	7.4933878	7.429489315	7.516916435	8.986550835	7.316782453	7.434723049	7.490330285	7.388287167	7.388831045	7.427145189	7.417823231	8.386173817	7.40012225	7.386669437	7.386106416	7.514020087	7.773620142	7.43531314
ILMN_1653786	7.315269817	7.333255552	7.15927919	7.262708382	7.219880804	7.254902216	7.21375364	7.315381409	7.286512356	7.361219207	7.346027625	7.358063123	7.275694127	7.274259933	7.274327171	7.259805476	7.28431791	7.366081598	7.251388678	7.328215998	7.282834141
ILMN_1653787	7.348720159	7.920598984	7.32317353	7.342468858	7.404256382	7.394184591	7.209351426	7.356473686	7.372803036	7.412760933	7.344632041	7.395122899	7.275415197	7.379007103	7.430369039	7.442902636	7.342856732	7.378203021	7.378557528	7.377724408	7.355501108
ILMN_1653788	12.34898083	13.74084147	13.46606014	13.07582841	13.95741059	9.661066932	14.03777825	11.38001279	9.577698864	11.03002849	10.36589609	10.38875699	8.977117954	11.54131642	10.31573502	10.94936346	10.40193243	9.907510733	7.433110371	9.305990777	8.674073215
ILMN_1653793	10.89162741	7.290347529	7.109526829	11.62537525	7.210958935	12.4273712	7.180316175	13.26949216	13.14574957	13.09948392	13.2002997	12.99084918	12.81998308	13.04212738	13.04104896	13.10552235	13.1908266	13.09676138	12.97706383	13.24123157	12.98035002
ILMN_1653794	7.550899989	7.31784069	7.761312494	7.57005737	10.90555365	7.364222869	9.328702547	7.478830548	7.501949118	7.513524982	7.514368798	7.39797605	7.542078204	7.488045103	7.516362932	7.480391097	7.467490457	7.419453228	7.5123324	7.465662829	7.430879594
ILMN_1653797	8.13813462	7.706926315	7.339678784	10.57116423	7.226007847	10.79370465	7.198947061	9.137662619	9.315798345	7.985100456	9.938161845	9.451694115	9.890459139	9.643683117	9.966595949	8.57272585	9.935087403	9.66176843	9.95386169	10.66151302	10.78610012
ILMN_1653799	7.268024263	7.299069534	7.316380455	7.268841429	7.22658026	7.249942445	7.211726137	7.292525804	7.251239168	7.35321511	7.241595766	7.244995438	7.252533793	7.316913815	7.319479026	7.244133584	7.270105136	7.342030155	7.174353465	7.246464407	7.320335175
ILMN_1653801	8.075529013	8.543223499	8.420567671	7.626841832	9.067307488	7.626753483	8.932633756	7.721899942	7.72292621	7.732904388	7.563513041	7.637533809	7.620689927	7.713029288	7.572303184	7.775750265	7.726805277	7.668981383	7.661995743	7.628849169	7.666128025
ILMN_1653807	7.204008897	7.248544154	7.294200504	7.21856781	7.205738655	7.334778207	7.160082705	7.365465554	7.320167357	7.397721171	7.282369469	7.358587022	7.219428515	7.317498759	7.296308547	7.224179373	7.302700867	7.308755889	7.209080317	7.27280248	7.246627893
ILMN_1653814	7.44357407	7.504170182	9.485404271	7.874731223	7.226613249	7.381502267	7.381688397	7.509360851	7.427930895	7.433752879	7.572317367	7.430773103	7.410659332	7.37701515	7.407880728	8.008397988	7.595392781	7.430705565	7.437338909	7.418993968	7.436995917
ILMN_1653821	7.235007457	7.259129992	7.202776972	7.232839979	7.213795956	8.733009436	7.19929137	7.265753312	8.741977979	8.707775347	8.191717826	8.198699465	9.354108831	8.481193417	8.005345328	7.418895163	9.484273131	7.235024492	7.150733061	8.515288867	9.559374326
ILMN_1653822	8.201505333	7.335060011	7.296141724	7.872223913	7.222928161	8.327899391	7.254800058	8.74265064	8.499716107	8.582306767	8.435704243	8.57712637	8.34618545	8.427156607	8.369960511	8.272253015	8.367121582	8.246233999	8.362220931	8.319457564	8.29978744
ILMN_1653824	8.862108667	11.52199315	7.798181503	7.655578249	7.796562568	9.925209461	7.911407972	10.62006543	10.62321077	11.6524145	10.81345215	10.61137699	10.78076229	10.80098433	11.05421488	12.48938182	10.75518795	10.19820464	11.66699451	10.05940595	9.985410301
ILMN_1653826	7.209457346	7.224525802	7.255078143	7.266074436	7.210908207	7.226143322	7.20534707	7.230994623	7.292979646	7.212965254	7.166595113	8.474113629	7.236266383	7.220915134	7.238893264	7.236291579	7.293650973	7.765738998	7.262493144	7.409378814	7.246374052
ILMN_1653828	11.97042266	7.918260115	8.716135579	11.8496745	7.832950846	11.90983336	7.541923378	12.71551961	12.03043938	12.09092909	12.56317224	11.87434401	12.03576529	10.4770438	12.64200864	12.45318449	12.47518531	12.92648958	12.84567561	12.38614388	12.35736194
ILMN_1653829	7.242201781	7.268367097	7.351316119	7.284566694	7.241250845	7.316309218	7.221986988	7.277331744	7.271332382	7.22433883	7.37356753	7.402517696	7.22223477	7.375382895	7.29971357	7.290148726	7.28469321	7.313829819	7.278831099	7.336559938	7.325990016
ILMN_1653833	7.252641516	7.313985622	7.322273505	7.252935414	7.222180577	7.324221378	7.200173335	7.352567299	7.413004344	7.332018515	7.278486242	7.33741328	7.361505532	7.38363494	7.30286045	7.212972816	7.298026693	7.291060285	7.339139906	7.250269051	7.347786796
ILMN_1653834	12.6007177	12.89207173	12.68292778	12.99818023	7.381053605	10.84161719	12.18233899	10.1088729	10.33765889	10.95621309	10.44904633	10.1750447	10.41155606	10.21874866	10.26338514	9.838014801	10.34327971	9.918833431	10.62134635	10.09115871	10.46670957
ILMN_1653836	7.253603383	7.284121817	7.302720593	7.328246032	8.478352105	10.96806666	7.181378861	9.58550532	9.326971501	7.379173358	9.147132379	8.290874854	9.593839696	7.473133221	8.699999132	9.633945869	8.79870591	8.31349881	8.304966624	11.04749828	10.36291125
ILMN_1653846	7.53410221	8.210534746	7.487128658	7.562050084	9.930969379	7.408468225	8.27419373	7.539357791	7.468878675	7.503103929	7.413759917	7.554503718	7.441723453	7.474833623	7.526201416	7.381218199	7.474984743	7.506326239	7.413007808	7.400295298	7.489023492
ILMN_1653856	12.13974792	7.235483421	7.235504829	9.274766795	13.21515865	11.85704366	7.168225364	12.75204073	11.72842706	12.25596355	12.57489696	11.59760574	12.6628276	10.38455279	11.39580343	12.76810127	12.24621804	10.61712141	12.45514095	11.7309719	11.40744142
ILMN_1653861	11.56980456	10.45168767	7.672195784	8.833673683	10.76725203	14.20299277	10.86219898	13.63685358	13.58802146	13.27343684	14.04147646	13.33930896	14.01270645	13.36722735	13.83551295	13.31686934	13.67005855	13.97265107	13.73554921	14.25804156	14.23276708
ILMN_1653864	7.254063956	7.275164346	7.324546563	7.259800581	7.222315323	7.256345271	7.205724691	7.244701082	7.278026728	7.255858449	7.212302152	7.23581814	7.391716519	7.395775415	7.293601514	7.220391841	7.252539366	7.397214236	7.292145495	7.24758181	7.316299013
ILMN_1653865	7.486955174	7.479228096	7.359427577	7.69763306	7.309580388	7.391037062	7.329918013	7.446052945	7.406562002	7.483330652	7.407054855	7.346421279	7.347724941	7.408133146	7.403377061	7.43379435	7.38328656	7.389619371	7.437489682	7.380666468	7.336424967
ILMN_1653867	12.13260707	11.76338269	12.10196963	12.07777049	7.228881813	11.20828713	12.54107662	10.29748781	10.34653082	11.06806967	9.80473597	10.95826718	11.07481794	10.17968075	10.66876945	11.84873905	10.72054423	11.26688175	11.18068904	10.60804342	10.08185722
ILMN_1653871	13.4770095	11.61719807	12.55180919	12.8244869	7.188952689	13.13730996	12.28045054	12.63002681	12.16458194	12.90226738	12.42441049	12.49385986	11.87655527	12.43885099	12.41274488	12.90850803	12.24162677	11.81434569	12.60692525	12.40224918	12.01208721
ILMN_1653876	8.349365433	10.04106292	10.31796268	8.664730318	9.354718367	7.739452008	10.94112985	8.071707432	7.77710601	7.735479986	7.671743473	7.756095342	7.637588237	7.659388887	7.750484361	7.71899926	7.751442533	7.637778738	7.680809334	7.6636164	7.667028148
ILMN_1653878	7.502780718	9.401684705	11.81730007	9.246899287	7.228192522	8.199093935	7.20678003	7.34544837	7.720557216	7.894499322	7.512158932	7.895057767	7.808020345	7.85908938	7.748008043	7.728005637	7.612227008	7.755094301	7.934489181	7.880509097	7.814697764
ILMN_1653879	7.265782081	7.274862372	7.315978214	7.357878391	7.195020521	7.334424171	7.174315688	7.228079236	7.368803278	7.214360275	7.297526808	7.297469778	7.311716278	7.339001372	7.295090989	7.299297749	7.33180549	7.322969537	7.205662929	7.222928241	7.275152635
ILMN_1653896	12.62377956	13.49875567	14.1085866	12.50077055	14.19161664	13.76273084	13.95032553	12.16869611	12.09407209	11.22645722	12.05630141	11.25870979	13.14218723	11.90561848	11.44268892	10.38908368	11.13675292	11.5198048	11.39097364	12.52306752	13.19362153
ILMN_1653904	7.591178125	7.318077595	7.288585458	7.400402372	7.281582116	7.509835763	7.213146663	7.37272099	7.405273327	7.36619609	7.457906356	7.353491446	7.456296157	7.447055648	7.394677744	7.359751311	7.337642367	7.415021427	7.412132949	7.417748127	7.448266586
ILMN_1653910	7.205893212	7.31331612	7.353392443	7.223108396	7.755242514	7.311404393	7.214694993	7.246586363	7.25585561	7.265954367	7.237920249	7.242075964	7.231538729	7.265450906	7.244957121	7.257385595	7.25390167	7.286150377	7.3123877	7.202324996	7.318658087
ILMN_1653927	12.40726794	11.85698025	12.69972834	12.51687959	7.223047119	10.66220553	12.81819857	12.80426716	12.71762184	13.49772002	13.17115506	12.95162262	12.58849666	12.68619409	13.29031492	13.76606219	13.80900889	13.42237155	14.01847916	12.33069058	12.18875881
ILMN_1653934	7.295056675	7.293733207	7.574394455	7.238566627	7.196869644	7.269718885	7.22372235	7.281338442	7.322050748	7.254866699	7.206278211	7.347593322	7.31943872	7.340736985	7.26335979	7.466952714	7.280103984	7.392549886	7.362972409	7.313411835	7.317860192
ILMN_1653940	12.822671	12.10538087	12.36720426	11.92442669	7.316173909	12.55683583	12.60420832	11.35715878	11.66140116	11.06622843	11.55159684	11.02087514	10.29449051	10.93534731	11.64881672	10.51600547	11.2720455	11.5865839	9.980865746	11.88676759	11.84317614
ILMN_1653945	7.37792342	7.30022282	7.390466044	7.479567694	7.22647667	7.417632445	7.249738147	7.401003314	7.469477524	7.325132371	7.431907024	7.390064545	7.434064171	7.266209715	7.384971903	7.377496521	7.393661127	7.291875643	7.317165644	7.441885408	7.411103104
ILMN_1653956	7.447630237	7.452301494	7.312198642	7.391589171	8.212384023	7.508884381	7.21319323	7.679886521	7.574365391	7.580298701	7.676206983	7.714784955	7.776990866	7.837750684	7.665882168	7.760580524	7.643033872	7.661749092	7.68292902	7.647531386	7.593351134
ILMN_1653965	12.25101636	13.17274432	12.62461451	12.48727454	13.82844255	8.527404082	13.6290023	9.322459678	9.81470216	10.35197993	10.12604323	10.63447279	10.14125184	9.329730835	9.574389008	10.16352439	9.496256096	9.405749383	10.00869367	8.680769154	8.610891741
ILMN_1653980	7.22292721	7.285041171	6.94831817	7.245316075	7.241505483	7.507605219	7.199667716	8.118267453	7.632146349	7.267437242	7.731529817	7.193117555	7.685537632	8.034040731	8.122144882	7.996255036	7.785980555	7.665422807	7.860242299	7.624161771	7.594884699
ILMN_1653991	9.563385447	7.262867066	7.211430917	8.60331093	7.213703817	7.709613264	7.205204398	8.096641019	8.066546458	8.122872358	7.693384358	7.978902063	7.691839483	7.952660653	7.762615571	8.094043754	7.735443487	7.695424177	7.89736146	7.653113531	7.625953326
ILMN_1653995	7.270159548	7.275968773	7.276506059	7.248744725	7.226926918	7.277651539	7.200502044	7.27668325	7.26544818	7.276916537	7.236456624	7.453477701	7.286385405	7.28149744	7.184682333	7.322747132	7.256341066	7.251379372	7.341464838	7.392346978	7.266031366
ILMN_1654001	7.212177222	7.307136166	7.350254786	7.32420498	7.392286382	7.586378017	7.203250022	7.317620178	7.55303014	7.268639809	7.611952059	7.456750493	7.622111996	7.657897135	7.547980873	7.351641004	7.632151284	7.782948839	7.68038315	7.751719296	7.8316375
ILMN_1654010	13.77999548	12.61581857	13.2743642	13.14202753	7.203066596	13.34454184	7.208832263	14.10715965	14.07944101	14.00960289	14.08523681	14.47606166	13.61587098	14.08996163	13.90384745	13.90413583	14.15731851	14.18347957	13.75916609	13.9309553	13.56472997
ILMN_1654013	11.04503642	7.963303066	7.319261554	9.417603207	7.225672011	10.54853928	7.215092216	10.0456292	10.27756277	9.989889509	10.36599714	9.588741421	10.2262388	9.354460405	10.30711132	10.36884898	9.790077956	10.47457331	9.601887957	10.3545488	9.937014343
ILMN_1654016	11.20041013	7.290352183	7.349086618	11.5143963	7.215649893	14.38990091	7.209595119	14.4272691	14.45391547	14.30103494	14.53970579	14.37693913	14.36268107	14.25356028	14.77880109	14.64618738	14.85476513	14.461145	14.71405122	14.93504672	14.9592671
ILMN_1654031	7.287485049	7.207871725	7.272910087	7.221356544	7.188440372	7.385891142	7.182965347	7.477723022	7.432470909	7.34851937	7.485435403	7.441408535	7.44279344	7.583605891	7.555031082	7.570583699	7.568864863	7.450939702	7.521325601	7.521298147	7.551418063
ILMN_1654032	13.67242503	14.15560465	13.67559975	13.41284277	13.77445852	13.25065719	13.75136257	12.42831703	12.65500182	12.30894631	12.40485489	13.10015792	12.75737827	12.95198153	12.38854416	12.38671319	12.77525612	12.81471316	11.98304875	12.07790624	12.31985952
ILMN_1654043	7.222102777	7.288031195	7.059597765	7.2446091	7.221259076	7.216981351	7.209613006	7.314355033	7.297143443	7.171365593	7.183626284	7.246193262	7.154020918	7.251506051	7.193438088	7.230826686	7.239787186	7.234231239	7.225812308	7.178658942	7.267038338
ILMN_1654049	7.370646773	7.295188201	7.249231681	7.30109827	7.23908376	7.190030485	7.199724998	7.273155654	7.273779172	7.102931241	7.195540856	7.310777723	7.323746859	7.266634114	7.294896212	7.379532313	7.368579882	7.290449456	7.217493928	7.293923257	7.277778008
ILMN_1654056	7.288848891	7.251853354	7.312055667	7.286561345	7.24381691	7.273625688	7.215865757	7.276996789	7.338804881	7.338277476	7.235584982	7.354443487	7.39420215	7.333085977	7.305045032	7.289792487	7.341192853	7.286127464	7.240859354	7.295297556	7.300396264
ILMN_1654060	12.33005293	13.20088187	13.35063	12.93859814	12.87038577	10.77333876	12.76822303	12.02063444	11.47395078	11.35919219	11.21014867	11.10781781	10.81524477	10.75862536	11.52595246	11.19007314	11.2949528	11.24580199	10.89050055	10.01265043	10.57360791
ILMN_1654063	7.841789282	8.074052592	7.776502586	7.709833838	8.11032077	7.556340156	10.07290745	7.554026353	7.520035827	7.559468361	7.554116777	7.536945013	7.64891591	7.500321148	7.523989496	7.673435617	7.535737854	7.543316872	7.553550036	7.560530104	7.531350375
ILMN_1654064	7.25888361	7.325672464	7.445265537	7.307843473	7.736811677	7.332128206	7.214470033	7.302288809	7.255470651	7.319940563	7.298083521	7.302312539	7.273579607	7.339227069	7.24505502	7.377058516	7.33241988	7.297222371	7.23793424	7.283895228	7.350792366
ILMN_1654065	13.82257607	14.39686493	13.76087255	13.61082895	13.6215883	13.32206876	14.07899199	12.59581019	12.44347269	13.26953703	13.39092076	12.24955402	13.03170584	12.73363118	12.43425492	12.75846782	12.33327702	12.61886741	13.00878663	12.57512103	12.65320172
ILMN_1654068	11.20531736	11.61557343	8.904789863	11.54982765	8.162606912	9.309894209	8.008289743	9.763698434	9.588157656	10.10341675	10.02673408	9.783214679	9.609328954	9.491865254	9.482748125	9.162334094	9.435947493	9.520055697	9.927006248	9.307354328	9.173254084
ILMN_1654072	11.64775543	7.3337299	7.423359231	11.7377918	7.204766823	12.6823476	7.210951447	10.92414398	11.24641127	10.61780139	11.16642533	11.13411408	11.45012978	11.49985183	10.2043059	11.91737437	11.60445791	11.39607714	12.08780755	11.57082944	11.73800298
ILMN_1654073	7.230543906	7.284781386	7.311848175	7.228507155	7.302597057	7.293073412	7.211275232	7.304095994	7.320649169	7.388195769	7.287996975	7.300140318	7.274627332	7.326333301	7.303809343	7.304216413	7.272561874	7.356642678	7.285604858	7.347593739	7.348546545
ILMN_1654074	14.48728866	13.83805674	14.24851314	14.54707089	13.21503915	13.89541104	13.5811305	14.76711804	14.93423495	15.03955225	14.77748252	15.07716231	14.73675574	14.79375193	14.37520109	14.76296382	14.46968751	14.2267062	14.94003844	14.11227878	14.1434353
ILMN_1654099	11.7204908	11.76230266	13.06689114	12.36147609	7.225333312	10.64195388	7.872740774	11.89575464	12.44282533	12.54530358	11.34004646	12.63397572	11.73009132	12.21869362	11.99332209	12.01877353	11.69855725	12.19587089	12.16977211	11.36126208	11.62972942
ILMN_1654108	7.259445703	7.324495868	7.28563536	7.371171541	7.199495759	7.259943626	7.180735153	7.271049477	7.221711995	7.281537928	7.224544141	7.29796335	7.231603088	7.291411017	7.34228249	7.227338155	7.327765086	7.211420096	7.165259432	7.228546115	7.166041684
ILMN_1654109	12.4244389	7.296006031	12.17989665	12.05570855	7.221413075	13.17048143	7.194722108	11.79239481	11.35695692	10.21137668	12.16544947	11.36165349	11.83286411	11.34972358	11.9102476	11.28075407	11.416372	11.68596551	10.86909093	12.12411958	11.80026617
ILMN_1654112	11.35473589	7.284965683	7.348674401	9.805034085	7.204802117	11.73643972	7.208475106	9.7649095	10.17952152	9.810772168	10.45364582	10.19325901	10.8592409	10.30896739	10.4382832	10.62411584	9.859311875	9.793186454	10.19653168	11.06702928	10.55540397
ILMN_1654118	12.03394615	12.33227184	12.24724417	12.4747708	11.52207807	11.10880472	12.54284144	9.952683579	10.6176798	10.54174513	10.71520846	10.28603951	10.30840555	10.20798602	10.35479505	10.56403685	10.26601028	11.19611913	10.62077577	10.46691919	10.36175588
ILMN_1654129	9.610027732	10.7939217	11.38302236	8.643197955	7.227331842	8.006473927	10.79209174	8.329113586	8.167830927	7.938558554	8.039745712	8.187075674	8.09162013	8.225159936	7.989830433	8.165216783	8.040279016	8.129205407	7.84239362	7.99103442	7.987624578
ILMN_1654137	7.286761948	7.294183907	7.354016767	7.29095852	7.225411457	7.35233598	7.210959295	7.26638537	7.29160345	7.388082675	7.375894036	7.376521764	7.330250449	7.223485786	7.316717801	7.312982513	7.218124983	7.385933294	7.351506788	7.371562966	7.305529466
ILMN_1654141	11.17765064	7.451905666	7.640273866	7.738773425	7.221257365	11.0720296	7.267335114	13.03372529	13.13425548	12.77353116	12.81123051	12.63862554	12.51890882	13.16691232	12.45816632	12.89358062	12.69879761	12.48066929	12.75713708	12.52519804	12.76613736
ILMN_1654151	12.92254976	12.20941536	12.78714057	12.90275061	11.28102046	11.8205031	11.85604823	12.15105687	12.04990573	12.48633855	11.40384567	11.84833172	11.52546902	11.56220279	12.06719626	11.8782933	11.72095729	12.03216091	11.47612147	12.05751193	11.50712504
ILMN_1654153	7.207040374	7.269721933	7.224358639	7.276703417	7.209201955	7.33255235	7.212868311	7.235439603	7.319561047	7.45136734	7.29586711	7.484619004	7.556734549	7.185368388	7.246956889	7.211774097	7.340239322	7.316280828	7.491255234	7.471598256	7.248183255
ILMN_1654165	11.09193933	8.309840989	7.599380733	7.751743243	7.481910478	8.771693066	7.263862141	9.719268724	9.120592579	9.115929218	9.370927369	9.07650029	8.639219236	7.545848194	9.403897177	9.264620125	8.595646762	10.23120238	9.444037666	8.915100491	7.916541519
ILMN_1654170	7.334001344	7.300053889	7.342093604	7.427062321	7.21422915	7.394391255	7.213166384	7.325421289	7.353628815	7.384899924	7.357722884	7.409108818	7.317091842	7.4072786	7.336319103	7.391797912	7.354145621	7.327217844	7.373384296	7.402060752	7.337725289
ILMN_1654171	7.216206569	7.251018102	7.32062678	7.24506032	7.210921868	7.302400199	7.203985603	7.319912585	7.274917672	7.200785627	7.266851605	7.296698696	7.19507923	7.282113861	7.281448697	7.283320862	7.325642414	7.274702496	7.281192238	7.180304482	7.23240633
ILMN_1654185	7.334502668	7.236116733	7.373049524	7.394397523	7.216854804	7.379683052	7.71079371	7.417772873	7.371708307	7.49030842	7.357286823	7.33572049	7.354291697	7.393061209	7.332660106	7.347104452	7.346093643	7.329105022	7.371381367	7.308173381	7.267129996
ILMN_1654187	8.537084909	8.914733326	8.338787023	8.578388661	9.347534008	7.875212422	10.3482849	7.857871104	7.802630892	7.945539429	7.81138485	7.648942031	7.770125692	7.920322087	7.652017489	7.857194057	7.819227618	7.708182211	7.809820861	7.713912163	7.697815492
ILMN_1654195	7.448878772	7.286276845	7.353661649	7.471257479	7.218544901	8.33015879	7.207582326	7.893586642	8.007152347	7.793858551	7.950199058	7.772639285	8.022651095	8.18718242	8.340819207	8.06389415	8.026058232	8.111896749	8.563800729	8.549255576	8.628885705
ILMN_1654200	8.142364967	8.929141371	7.83591015	7.414639266	9.098553641	7.711640571	11.46195655	7.821269663	7.614255497	7.738736477	7.50670325	7.569428628	7.585773201	7.595891466	7.544337802	7.581301268	7.651090787	7.541147049	7.542897199	7.591180845	7.48302611
ILMN_1654204	7.251990816	7.294162645	7.296576196	7.222854236	7.217141616	7.35246716	7.212030059	7.273378259	7.232299919	7.239033091	7.390056387	7.511748927	7.388162937	7.340307106	7.391504158	7.240550334	7.32755067	7.315900535	7.160020116	7.269097141	7.440618469
ILMN_1654210	10.53543314	7.288023379	7.355305034	10.73549115	7.215537741	10.32897897	7.207811704	8.6112887	9.184216693	10.45088681	10.4708891	10.69800136	11.48973476	9.031860206	11.03616804	10.54558487	10.45986001	10.80958134	10.75245539	9.711568265	10.41802581
ILMN_1654212	8.092565651	12.54454924	12.56147386	11.88097348	13.00736032	9.058279849	12.96857762	10.3452917	10.27628714	7.734661963	8.507600149	7.70799665	9.707145184	9.669992492	8.359073739	10.6894571	7.890961042	8.259485188	9.605841901	7.622686974	7.789961803
ILMN_1654217	9.646608408	9.779066217	7.34547878	7.566095101	12.83544086	9.860360975	7.271259566	9.266967242	10.16135942	9.510611195	7.86553971	9.351772492	9.078526063	9.957459486	9.060799835	8.360757466	9.208679738	9.313163531	9.03228818	8.834156319	9.005007007
ILMN_1654226	7.640323591	7.356122999	7.372979364	7.321009765	7.496043518	7.302542521	7.991671949	7.326859784	7.392242717	7.388895568	7.379567657	7.312592909	7.155269146	7.389093578	7.382022348	7.409342245	7.359688198	7.321604987	7.396855739	7.362410127	7.322550569
ILMN_1654228	7.375679221	7.378759659	7.34841294	7.35017276	7.223623601	7.275081978	7.203191836	7.35696186	7.385048761	7.406016993	7.286037136	7.296035456	7.308952761	7.330217512	7.327436952	7.271132745	7.31021283	7.296336119	7.277241382	7.27677165	7.354818827
ILMN_1654240	7.279413009	7.293152151	7.361161757	7.282882236	7.223135412	7.261330618	7.202054682	7.216455317	7.347873722	7.37890961	7.339171137	7.267943873	7.319446849	7.328464779	7.323833599	7.30182558	7.325306803	7.207985995	7.228936086	7.243040992	7.350840914
ILMN_1654246	12.41224072	7.299082831	12.84268058	12.16228356	8.633232104	11.60490603	7.416196925	10.74767234	11.86122426	10.9271498	11.46195292	11.81246251	11.04017326	10.51457778	10.71928529	9.550380142	10.74162378	11.53220945	11.71331737	10.61368563	10.40050074
ILMN_1654249	7.818095951	9.035993478	9.060712518	7.844545834	7.889219198	7.556660951	8.271720161	7.608199504	7.64290768	7.595370572	7.547325806	7.550495072	7.535745242	7.662074231	7.525027882	7.52459315	7.610375176	7.58407997	7.552799078	7.572288468	7.614019131
ILMN_1654250	8.307750921	9.937749543	8.994233751	8.216487384	10.90135581	7.811863158	10.44257414	7.976427104	8.009381685	7.886573852	7.810030953	7.796309413	7.776088904	7.929457024	7.812777191	7.908541215	7.7957524	7.933969791	7.853966329	7.81592489	7.89123789
ILMN_1654261	11.43225433	7.261525796	7.004750061	7.218419412	7.190095278	12.37255951	7.20996039	11.29551265	12.17059635	11.79454924	11.6538021	12.55927718	12.03312783	12.53657341	11.8196312	11.28619003	12.48544625	12.25864354	11.62071757	11.87188457	12.06531447
ILMN_1654262	11.41678909	7.632356068	7.411897183	7.618971136	7.37906898	10.91709384	7.456951553	12.28966484	12.41044931	12.85031543	11.73649208	12.56385589	12.46387407	12.59550217	12.01084736	12.39079343	11.88531296	12.38264073	12.08466936	11.70578634	11.99338444
ILMN_1654268	11.94034936	7.289565081	8.16672543	11.5124828	7.430886288	10.70619693	7.615906608	10.57700502	10.463142	11.47101078	11.3595854	10.77915445	10.47047265	9.706898317	11.3239568	11.80239165	11.3053598	11.58060027	11.30499467	10.55457834	10.2952246
ILMN_1654279	7.209445571	7.331251503	7.326683001	7.283341925	7.216366597	7.213724537	7.211406206	7.3053857	7.255515402	7.260721087	7.22334039	7.185790768	7.338507896	7.172677854	7.319344435	7.385048585	7.290101414	7.208029729	7.237653154	7.213534387	7.251008727
ILMN_1654287	11.4065508	7.25043916	7.21595556	7.214793231	7.175620414	8.047082323	7.172995246	8.878876597	10.74662469	10.80182794	10.16942068	10.88196703	9.250722329	10.30100747	9.525869765	10.58202224	11.34987937	11.07974926	9.503500108	10.73849908	9.798152843
ILMN_1654288	7.220158117	7.250741301	7.083356742	7.225640209	7.195482336	7.245168359	7.194724761	7.287329296	7.264971608	7.266653171	7.278659289	7.296367822	7.292756558	7.271759238	7.242303461	7.256682012	7.296570851	7.306688223	7.3039923	7.31178491	7.233742295
ILMN_1654289	13.01974683	12.38102785	13.5934765	12.73724527	8.732691287	13.25848969	12.83585416	12.34982124	12.54796573	12.7031057	12.47351642	12.36853691	11.66316775	11.84898201	12.2890155	12.1744518	12.3730574	12.08541093	11.91928728	11.75757498	11.64082095
ILMN_1654313	7.210463226	7.41248966	7.301850904	7.318262175	7.204045014	7.485821675	7.195372191	7.402154893	7.35241225	7.419295771	7.40086097	7.443293261	7.463680135	7.372207544	7.529588936	7.542084916	7.51267673	7.458347979	7.55697677	7.425888758	7.418918236
ILMN_1654317	7.470483518	8.384958345	7.354363851	7.315064288	7.226390659	7.318509893	7.216637847	7.382790703	7.357950067	7.352165143	7.346221722	7.439692093	7.433053931	7.425054799	7.33646991	7.369303176	7.279483747	7.339174131	7.313091518	7.381261553	7.326630442
ILMN_1654318	11.38690767	11.58479259	12.1496387	11.67391431	7.22265772	10.84593222	7.377286422	11.28222518	11.53014177	11.60754665	11.56044676	11.59070568	11.34807864	11.05327089	11.55539228	11.27443192	11.69450079	11.49446392	11.171172	11.36621472	11.06251629
ILMN_1654319	12.95253626	13.16570199	13.04471681	13.83712161	13.93957029	11.84450282	13.69075033	11.74531465	11.5862464	12.66323953	11.89171643	11.65249364	11.43857955	11.93835101	12.20510115	12.75231227	11.59523817	9.847944472	11.02382502	10.0140335	10.79764148
ILMN_1654320	11.68672961	12.57626181	12.28213851	11.92950587	13.30197635	9.385324254	13.20313201	10.48124863	10.59543336	10.65117806	9.832882209	10.31122535	9.881164365	10.39729933	10.31452107	11.08553057	10.25728806	10.47669572	10.24133863	9.587350643	9.283638428
ILMN_1654322	14.0263573	12.82372801	13.74480972	13.89589592	13.13021529	13.1374211	13.03443217	12.8576765	12.77141237	13.31730996	12.37933525	13.41937584	12.53922805	13.03157384	12.97001783	13.12676603	12.47681192	12.49195768	13.21807461	12.53048105	12.53179618
ILMN_1654323	7.753309509	7.293729871	8.850985202	7.842029189	7.282377925	7.416882755	7.439229803	7.64025553	7.631999244	7.514581646	7.485080597	7.586424952	7.533478501	7.556356632	7.657965919	7.529773695	7.591186183	7.659857263	7.510191337	7.584588671	7.538665417
ILMN_1654324	12.37114013	7.26242062	9.142319151	11.86171606	7.206267475	13.88663238	7.211223059	12.15163125	12.63917885	12.05417546	12.82820015	11.59224677	12.6019603	10.90415385	12.98115378	12.19930515	12.63782118	12.65080732	13.10031871	12.93981787	13.12694392
ILMN_1654331	11.96065747	13.02482104	12.84856851	12.48083096	13.56195862	10.86659759	13.21314394	11.32345219	11.32635204	11.55972976	11.1337512	11.54536606	11.25986806	11.50283284	10.87157995	11.17095431	10.40198916	10.57034755	11.06092325	10.55960074	10.46889984
ILMN_1654336	7.309070082	7.339677665	7.29387801	7.307092424	7.226503216	7.283208772	7.211863967	7.304633028	7.326969658	7.199377673	7.236608123	7.214070817	7.309857944	7.328405913	7.300395951	7.251211433	7.31067479	7.281642503	7.30232249	7.287071733	7.298127622
ILMN_1654340	7.243917509	7.25336742	7.257098549	7.248946198	7.215903849	7.293257925	7.193476065	7.251146784	7.266090568	7.321549288	7.353129965	7.217349079	7.323058231	7.257888782	7.251378726	7.257059877	7.296351926	7.272348418	7.288690036	7.331090191	7.142539712
ILMN_1654346	7.20421679	7.251085951	7.293989396	7.297336003	7.201440092	7.22648958	7.193592551	7.246499802	7.254549968	7.281827865	7.269086186	7.279198662	7.195752988	7.255715808	7.190149217	7.212241873	7.220284652	7.250772778	7.229677675	7.235551792	7.247668929
ILMN_1654354	7.204593721	7.278110259	7.299352423	7.237476674	7.212785335	7.20842605	7.199574084	7.262447948	7.211653606	7.281254423	7.293705868	7.298822846	7.282892466	7.390799025	7.287973721	7.344673926	7.170913838	7.310515274	7.313963122	7.267132038	7.358991956
ILMN_1654357	11.62724761	7.223192116	10.4628036	11.8830987	12.42114811	11.20183125	7.211192499	11.93838645	11.75372159	12.10286426	12.37031823	12.06178633	11.85885459	11.46302068	12.18460386	11.85756994	12.35615243	12.36799416	11.96015641	12.02872715	11.95915529
ILMN_1654365	7.35292848	7.294264736	7.354917463	7.328868523	7.229233099	7.650863606	7.197297297	7.35173219	7.992486937	7.376473443	7.417073601	7.448841787	7.871095239	7.369956497	7.77716772	7.406068195	7.371931224	7.683060748	7.315947727	7.371628662	7.566872002
ILMN_1654369	7.42267071	7.292269754	7.31300653	7.358800706	7.223398865	7.286671458	7.208400615	7.285210317	7.265765096	7.303369546	7.266747717	7.391687696	7.325994233	7.347273526	7.331426507	7.289635954	7.301531191	7.27556409	7.325285777	7.406113612	7.338382446
ILMN_1654370	7.599135005	7.293199897	7.337204015	7.573929924	7.206592663	9.586164015	7.231458551	9.262566225	9.924521656	8.951764683	10.23932755	9.068069481	10.35465574	10.29556342	9.90788544	10.26545278	9.871370206	10.44890898	9.769179449	9.951003688	10.09210813
ILMN_1654378	7.308689744	7.296323645	7.34966096	7.318185796	7.226915933	7.390551781	7.291814847	7.357992569	7.289563473	7.411454976	7.270337665	7.329410014	7.334722005	7.45164639	7.337204079	7.418352487	7.349546227	7.387443876	7.354114319	7.287688569	7.326559706
ILMN_1654385	13.03755972	7.234058592	12.48909644	12.45990273	7.166495602	13.19708311	7.133374049	12.14046701	13.05375837	12.50789244	12.70344639	12.77166012	12.37001293	13.31173765	12.69540278	12.02364545	13.10833539	13.14809737	12.30127217	13.19648123	12.90131952
ILMN_1654386	7.258625464	7.316256879	7.342011838	7.813787804	7.23832611	7.89958546	7.209058178	8.200355254	7.264331867	9.236584452	7.783911761	7.263506058	8.726330424	9.559357757	8.282573284	7.328940174	7.83802837	9.000072303	8.119501736	8.317184656	7.543869622
ILMN_1654389	7.427012676	7.251845344	7.386337368	7.435622317	7.241565222	7.369016238	7.193852699	7.429271972	7.42887003	7.42489813	7.370489208	7.470558105	7.424169224	7.373983035	7.398234201	7.44426412	7.355951712	7.387365711	7.375968926	7.421567655	7.42996831
ILMN_1654392	14.58245762	14.4257791	14.88926661	14.5573113	14.22871855	13.54937795	14.18609384	14.08470996	14.16611451	14.36762055	14.16980696	14.25003735	14.3161819	14.26783848	14.08599014	14.13909891	14.28834169	13.87159483	14.07661663	13.3166896	13.89746785
ILMN_1654394	7.678012052	7.300730327	7.70248776	7.356115209	7.673288873	7.56063757	7.289570516	7.580837509	7.593512538	7.524094645	7.405345216	7.531018492	7.498013291	7.604802173	7.573260498	7.519795883	7.561218885	7.465837985	7.524312084	7.411663626	7.430268295
ILMN_1654396	9.061991727	10.65735	9.911963813	10.59110693	11.19558241	9.888742036	10.94647265	9.514218374	9.841140681	10.31845162	10.61229906	10.13420827	9.732408088	9.084393583	10.10845702	10.01587883	9.507278682	8.958224306	9.313405499	9.676524781	10.45150744
ILMN_1654398	10.96177278	7.412339848	7.264058481	7.226656555	7.209250536	13.83487407	7.213358486	11.91248455	11.8567169	11.50395093	12.78464152	11.27772846	12.40662573	11.45308708	11.95711665	11.20243914	12.12167623	12.31600524	10.73988548	13.02956255	13.2200701
ILMN_1654402	7.928513613	8.324088866	9.30615341	8.078989893	9.469299225	7.576014491	9.933875519	7.641837622	7.574209787	7.569858444	7.569006734	7.611357936	7.623914195	7.603817348	7.580282961	7.539563786	7.584210474	7.529549232	7.585888592	7.528733699	7.492267816
ILMN_1654403	7.833603113	7.833732748	7.904402474	7.709465945	7.568660308	7.502757482	9.924407717	7.482181128	7.512193078	7.498322368	7.485308538	7.465308872	7.462828421	7.47216267	7.449823414	7.48853912	7.410865845	7.452556542	7.483908257	7.459216396	7.518857094
ILMN_1654408	11.43949174	7.300701167	7.249510022	11.3379323	7.194394172	8.427013156	7.171759583	9.754925958	8.610098881	10.20964081	9.023276113	9.419927901	9.043257991	8.350189498	8.757366849	9.53984285	9.533119905	9.631232797	9.200254422	8.858844707	8.466871003
ILMN_1654411	7.302438665	7.754596726	7.340274582	7.343466041	7.224291228	7.500479939	7.21003403	7.925963309	7.877874332	8.865617041	7.737801307	7.910980158	8.02793821	7.311193954	7.929325292	7.447408452	7.821788868	7.603351414	7.824424752	7.4731919	7.387198963
ILMN_1654413	7.460019771	7.347096441	7.631475685	7.767441518	7.45148382	7.482622547	8.344520887	7.476622717	7.561739544	7.537075423	7.450946289	7.537225499	7.454595538	7.561649993	7.507804606	7.528612388	7.432156933	7.492628604	7.576199986	7.470516557	7.525394004
ILMN_1654414	11.73551702	7.315713966	7.539072277	11.63598546	12.62626968	11.51483616	8.656026026	10.87440375	10.59636073	10.78219083	10.6878055	10.82432506	10.61306104	10.5858015	9.765304218	10.98842193	10.74962138	10.49806169	10.89269738	10.73283263	11.16766737
ILMN_1654415	7.213947461	7.29303851	7.206105302	7.230107111	7.19777696	7.212899184	7.200980709	7.305817698	7.650692552	7.266257786	7.448317964	7.803836393	7.344935622	7.242428351	7.534058947	7.296521273	7.241093689	7.490825319	7.718539655	7.353706503	7.23607954
ILMN_1654421	11.38386778	7.350330171	7.350569911	9.027311128	7.226453217	11.7296345	7.191998318	12.18179372	12.43434372	12.23824395	12.42892533	12.24263661	12.39364094	12.17914997	12.3029434	11.15604615	12.45190779	12.45008373	12.81829487	12.84896946	12.65070876
ILMN_1654422	7.22177852	7.233948811	7.314881068	7.245087764	7.21249478	7.538015267	7.204155645	10.26693156	7.231619747	7.23058381	7.166672971	7.174202044	7.262602261	7.263080155	7.309292248	7.113731483	7.699210405	7.263404931	7.234800911	7.406336082	7.539802953
ILMN_1654427	7.233939922	7.290919831	7.342830479	7.217356054	7.223293568	7.254723265	7.208549128	7.343184112	7.307771709	7.351221438	7.295661427	7.263521231	7.281539526	7.367591866	7.332995012	7.323361951	7.326469367	7.395568065	7.235658117	7.287409719	7.225408832
ILMN_1654429	8.514749019	9.561453495	7.323263279	7.552106011	7.44605306	7.65020253	7.301223874	7.88960948	8.031612423	8.086215002	7.864155044	7.987397482	7.915987709	8.063346433	7.929872873	8.062372419	7.918470009	7.976954246	7.96792112	7.961826904	7.700813846
ILMN_1654430	7.21005454	7.289187818	7.263690619	7.268436391	7.222308193	7.276538986	7.185950476	7.227763572	7.190587151	7.286765573	7.246833654	7.201922427	7.296910839	7.310698714	7.276340631	7.301881847	7.244558727	7.294908129	7.362925197	7.27557689	7.236382781
ILMN_1654436	7.813573473	8.379393329	7.704194844	7.945424068	7.23729173	7.556823213	8.70000527	7.580286006	7.499374708	7.56300727	7.563207041	7.515570513	7.549132059	7.592237458	7.560819467	7.477688841	7.548675395	7.592275963	7.439830353	7.525107205	7.575989047
ILMN_1654441	11.89342197	11.93220982	7.45016182	11.92955059	7.224198879	11.44539916	7.195626041	11.04674996	10.8085602	10.62491017	10.51253801	11.19491117	10.84260763	11.21754159	10.89556167	9.814999334	11.34959071	11.43088503	10.85763638	10.8975182	11.21962674
ILMN_1654445	7.732326134	7.300507207	7.361489248	7.377251912	7.223635408	7.448565435	7.382543726	7.423754591	7.453497971	7.528653656	7.468288957	7.38086353	7.406437482	7.451529686	7.432455689	7.489772979	7.381352965	7.340117778	7.396977222	7.402708483	7.389792774
ILMN_1654452	7.646164723	8.601940517	8.364336988	7.868136367	7.545598423	7.770935787	7.235545912	7.694659445	7.765545553	7.548803994	7.502083245	7.587596278	7.630158868	7.664409467	7.525691091	7.603301003	7.616443612	7.599669016	7.512913186	7.583383793	7.597794842
ILMN_1654457	10.86597608	12.06599314	11.84518654	11.64478506	12.438992	9.94800277	12.28558918	8.413901157	8.131054753	7.704131758	8.132444294	8.132988234	8.22000221	8.361709768	8.16066292	7.903221765	8.187575286	8.144854868	8.109554786	8.315393705	8.437456161
ILMN_1654458	7.264157392	10.53946675	7.230489687	7.308567747	7.205129204	7.638244585	7.204217485	7.292404923	7.361479678	7.344581124	7.438839834	7.499358679	7.697153367	7.283934759	7.352460549	7.429391085	7.437234815	7.293224537	7.454048295	7.546989702	7.574352332
ILMN_1654459	7.216220735	7.239433081	7.363230361	7.230328213	7.1596637	7.115080971	7.175407725	7.259191144	7.179358671	7.38545709	7.213795639	7.186415275	7.111655102	7.098708592	7.219148659	7.230012565	7.233292723	7.22468416	7.191252186	7.2159961	7.140216477
ILMN_1654466	7.370646137	7.242037207	7.35979644	11.59765116	7.215577726	7.464208788	7.212447655	7.512514105	7.602026459	7.520584078	7.538527809	7.528040714	7.55017139	7.492793213	7.493955142	8.769657276	7.512402643	7.519235866	7.475238122	7.566600006	7.488953927
ILMN_1654468	7.223146047	7.26939174	7.330556458	7.486598998	7.226226	7.727330472	7.209720296	7.261342979	8.296907032	7.389538243	7.333142686	8.62716834	7.824817608	7.410522	7.336531777	7.351782846	7.269160563	7.368755403	7.301861206	7.760326655	7.320352404
ILMN_1654473	7.232859097	7.288930741	7.198019505	7.237136097	7.202316973	7.241871373	7.1752751	7.243602573	7.206878465	7.278875964	7.259528235	7.25480217	7.231285329	7.215942628	7.275969214	7.194310912	7.243816774	7.29916036	7.17632149	7.250927539	7.175312458
ILMN_1654474	7.218720056	7.256885584	7.300970726	7.230632835	7.195569959	7.270462588	7.269601975	7.246954565	7.315032404	7.203301362	7.314715054	7.308554728	7.329570949	7.284661609	7.272274205	7.271088987	7.284391825	7.298833216	7.242815439	7.237325755	7.242095621
ILMN_1654479	9.325250506	7.283416501	12.00470935	7.258035124	7.212947567	7.386051539	7.203376086	7.382458887	7.423011944	7.404030416	7.886437451	7.77588399	7.498098317	7.306426885	7.715908496	7.465393798	7.302249953	7.272929746	7.375423038	7.401382543	7.522673127
ILMN_1654488	12.18020063	7.299963066	12.42729327	11.93070762	7.243439973	13.30315211	13.16173846	12.65218184	13.26772809	13.03723572	13.40261656	13.07375111	13.49870488	13.53107575	13.16061478	13.08473076	13.2346807	13.17155408	13.45730984	13.45227751	13.88259673
ILMN_1654493	7.73292189	8.059202325	7.403677182	7.518679525	7.24487402	8.111236007	7.714979949	8.2032218	8.354882891	8.405987632	8.307695142	8.272447091	8.14014991	8.246851589	8.324699102	8.420209872	8.200869225	8.21977366	8.336980163	8.198868062	8.04623743
ILMN_1654496	7.239114316	7.297485025	7.274109947	7.250043553	7.219900802	7.37582964	7.211608625	7.227018676	7.321675571	7.354730661	7.257223632	7.284549133	7.292287073	7.326321951	7.310956221	7.214121248	7.25114855	7.290859029	7.1961031	7.287851736	7.289332256
ILMN_1654497	7.348747292	7.283468762	7.255382573	7.332912037	7.237965173	11.20582959	7.226595637	10.23541577	10.50649806	8.430903377	10.41428605	9.912729166	11.14330189	10.50257805	9.98490439	10.64851176	9.957634069	10.23891479	10.37156464	11.49793205	11.50752775
ILMN_1654504	8.130553235	7.254627355	7.182962967	7.238563238	7.158112362	9.568345099	7.170858848	8.958324003	8.617165759	9.464397533	8.68309605	8.653874255	8.679851738	7.96399225	9.617402028	9.388622134	9.106159728	8.371780166	8.870306642	8.862632753	9.308152342
ILMN_1654516	13.34272288	13.42446701	11.7792007	13.19797778	13.29421016	14.48146277	11.34939943	14.17761597	14.32087331	13.99440382	13.66151623	14.17904216	13.65808353	13.98574146	13.69991826	13.59851364	13.84767645	14.03959794	13.50086302	13.57434576	13.65829535
ILMN_1654518	7.34717396	7.303468304	7.328027213	7.653817929	7.225378445	7.683830669	7.213933757	7.365460997	7.408796076	7.401341669	7.381611623	7.43265435	7.368724218	7.294312352	7.383544142	7.455892804	7.459066996	7.374587748	7.412336754	7.506812469	7.490068908
ILMN_1654522	11.81197827	11.6066649	11.96582085	11.78260888	7.185418007	9.855392743	12.11990428	9.109006972	9.707630762	9.671144201	9.50692919	9.548337505	9.689670479	9.298871805	9.534690516	10.14668104	9.084879353	9.262374562	8.879605341	9.347798874	9.01663606
ILMN_1654526	7.218917812	7.28380127	7.178277676	7.27650418	7.300271158	7.245326605	7.200665627	7.297048634	7.258300557	7.158813002	7.217401597	7.243610331	7.288262122	7.218340369	7.249029067	7.209579755	7.254106783	7.252178234	7.291618557	7.254951732	7.326464717
ILMN_1654534	11.85701043	7.312365337	7.318194411	7.45648202	7.60474408	9.2043088	7.212621421	11.3799428	11.40338733	11.944561	10.31087429	11.24119221	10.46125993	11.21411652	10.97620335	12.04632681	10.62380101	10.44459381	10.65213938	9.880881222	9.743286552
ILMN_1654540	14.86228734	15.11481847	15.0793871	15.3861176	14.44407776	13.89992548	14.88047334	13.20797168	14.21322492	13.45607752	12.61939321	13.94429726	13.70310798	14.04982898	13.05611167	14.01212898	12.74141039	13.20219038	13.46415347	13.81314258	12.84584556
ILMN_1654541	7.513718956	11.71235749	11.95515828	7.404660677	7.225006187	9.746679731	12.3488676	9.828987677	9.202847524	9.097899407	9.116038193	9.342542139	8.909221935	9.449520101	9.546624698	7.882807679	8.905189104	10.12459794	9.70180827	10.00637729	9.679793324
ILMN_1654542	11.47953482	7.189062471	7.29188431	7.306288259	7.169612783	11.74038918	9.975367063	10.73549191	10.32067802	9.293921689	10.21100439	10.34618806	11.08411711	10.80489375	10.69709616	9.668037203	10.30964965	10.59961119	9.500625886	10.69888519	10.60408481
ILMN_1654543	11.8777009	7.271843007	7.364267829	7.234391701	12.92181263	14.1134183	7.200515721	13.40257707	13.38966384	12.81729729	13.38666631	12.96962678	13.86348005	13.53000764	13.43971951	13.31022448	13.75684224	13.27930098	13.52594624	14.05633133	14.41553057
ILMN_1654545	13.58386022	13.41260511	13.2375297	13.81963697	7.214005334	14.66905554	11.97873925	14.88395267	14.21714303	14.61112745	14.56224578	14.67396053	14.71961368	14.06246737	14.35544775	14.43806649	14.61003697	14.18371772	14.53922974	14.58900026	14.46154182
ILMN_1654552	8.758719468	7.203759195	7.303106342	7.215781912	7.215536932	10.73818649	7.200564629	9.64736175	9.608657081	9.330454126	10.34611313	9.763692927	10.65965426	10.86632924	10.28283005	10.02261071	10.70295319	10.79539288	10.41315209	11.71175236	11.7532367
ILMN_1654560	7.378991296	7.292163739	7.354417058	7.465907741	7.978951151	7.450958929	7.717328217	7.338589941	7.27521479	7.507895432	7.471581334	7.37607106	7.404446234	7.352690603	7.380211216	7.37870724	7.419818608	7.337244424	7.39713406	7.439539343	7.425488841
ILMN_1654563	13.43212512	7.294082683	13.29583366	13.25030623	7.226053699	14.1855117	7.212063822	14.46325569	14.36321941	14.76713688	14.31101972	14.37349703	13.8147392	14.46039015	14.03856908	13.55743119	14.09729737	14.09370883	13.47317968	13.91559596	13.87903483
ILMN_1654566	7.201345045	7.529550345	7.282735831	7.218966644	7.216520616	10.83968584	7.190243773	10.66447397	10.80375462	10.0330517	9.910356831	9.971230689	11.06590284	11.45281224	9.882755149	7.252085589	9.907049359	10.43724846	9.17567259	10.61667995	10.61813405
ILMN_1654570	8.34436495	9.153075611	8.923409266	7.599695556	10.40785468	8.044582597	10.48803044	8.385696297	8.318990257	7.635049395	7.714937245	7.793732102	8.210095517	7.721552235	8.132414982	7.838229066	8.398034737	7.869000057	7.67483957	7.915030767	8.119250857
ILMN_1654571	7.33864719	7.309828722	7.271303428	11.81197955	7.211816534	9.40126834	7.210515978	7.261016398	7.346894031	10.5812811	10.63848851	9.897152602	9.646829	7.423558311	10.21569701	9.843600564	8.764337736	9.059505701	8.844660882	8.800952719	9.073612178
ILMN_1654583	7.232960047	7.263270825	7.322600295	7.317975322	7.219630739	8.754014576	10.21694503	7.737988673	7.819241098	7.494842869	8.067325159	7.838739098	8.257808914	7.744013374	8.058617026	7.859538634	8.005733329	8.032297931	7.704211632	8.533204633	8.771301467
ILMN_1654586	11.69492591	7.69488253	7.682804238	11.99014374	7.229422787	11.99868537	8.642511391	12.02124036	12.07750538	12.23756945	12.56087156	12.36229577	12.62334712	11.97969983	12.03295741	12.63655584	11.85967561	11.97395732	12.2100111	11.67114951	11.92463601
ILMN_1654588	7.317631227	7.309106489	7.263138745	7.43174591	7.215056423	7.36658425	8.436076461	7.38097917	7.350583443	7.383095088	7.434856608	7.495977181	7.361991611	7.418647112	7.41755494	7.297546754	7.381146383	7.452234986	7.448092763	7.342874358	7.401349881
ILMN_1654594	7.444673351	7.400598996	7.375561256	7.5204089	7.718421754	7.353903266	8.007611572	10.11944694	9.177376297	7.375933074	8.092708042	7.421806241	9.111970928	7.45212757	8.548859996	7.423004039	7.446862204	8.381178087	7.453537813	7.314645117	7.844917346
ILMN_1654598	11.86109146	7.300255587	7.236372838	11.93556671	7.203383527	11.72161519	7.187906084	11.8130156	11.53061194	12.01681791	12.00740282	12.25457195	12.50956084	12.25123926	11.99022667	11.95455535	12.15972201	12.10996082	12.60599949	12.08862412	11.79803552
ILMN_1654602	8.848687608	7.362477793	9.90458121	9.107991993	7.369099427	8.071921997	7.27550719	8.257546572	8.481865928	8.42644335	7.908791527	8.171782603	7.965390064	8.304387724	8.088436504	8.069656347	8.144585156	8.143738093	7.949159861	8.163338936	8.052544395
ILMN_1654606	8.085005218	8.937013214	7.928476226	7.763203924	7.251767743	7.637069435	7.249357363	7.683847313	7.617710931	7.661141642	7.666279113	7.646868782	7.520889026	7.621927609	7.58583638	7.530055417	7.634018294	7.713972917	7.473179383	7.510214882	7.565245053
ILMN_1654609	12.19685487	7.270554783	12.00400474	12.08346935	7.220895271	13.0674133	7.211316524	10.90758283	11.46969752	11.46653204	11.53520226	11.82369846	12.03110062	12.26611028	11.44264048	10.93711295	12.05196133	11.75530709	12.1038656	11.86336756	12.18445311
ILMN_1654612	12.15898305	12.44661975	7.317587369	12.91674551	7.223840103	13.15185071	7.21434515	11.9739432	13.00450664	12.36012976	13.11026885	13.06996737	13.28705541	12.80828453	11.87055811	12.66496939	11.88212157	12.51053862	12.4243395	11.95048674	12.00020265
ILMN_1654613	11.66419975	11.85828118	11.94962914	11.82119928	7.308797707	9.583248089	7.231324235	9.61428142	9.983370443	10.25365619	10.29640374	10.09373623	9.961452992	9.965245429	9.173934675	10.32959635	9.660109292	9.950894277	10.23710453	9.474309051	9.387283247
ILMN_1654626	7.323786164	7.279476554	8.952348106	7.248002059	7.214438034	7.569785275	7.206319779	7.404218026	7.591210676	7.48069718	7.397268298	7.542131488	7.553189459	7.645728047	7.460018893	7.507029127	7.663550547	7.680241244	7.469461283	7.654222319	7.633640873
ILMN_1654629	12.33742289	12.00614872	7.245902864	7.253031733	7.232257346	13.27099844	7.410716452	12.96915422	12.75071204	12.46336659	13.14612322	12.50952226	13.29378535	11.91958756	13.36870322	12.89145057	13.07223636	13.25443238	12.93351153	13.51493264	13.51063105
ILMN_1654630	13.9213109	13.11310179	13.42966766	13.86545608	12.98340636	13.8755372	13.34764821	14.24655713	14.18066749	14.17076567	14.53095794	14.25709007	14.19275224	14.07178317	14.46158571	14.52993273	14.03045274	14.26151932	14.41569198	13.94170302	14.09898404
ILMN_1654632	7.24156363	7.265008242	7.291760434	7.290669026	7.227625695	8.958853097	7.205153775	8.935139611	9.561293776	9.455272289	9.426103747	8.319733043	8.900193053	8.379108007	9.449023026	9.746589705	8.691727863	9.033471313	9.599463193	9.673965043	9.627551106
ILMN_1654634	7.266415938	7.290209903	7.305237981	7.296276483	7.223275439	7.310466314	7.237442357	7.283996197	7.22518481	7.317358507	7.311867656	7.332178789	7.410642179	7.290119075	7.354458932	7.374694295	7.258144136	7.287045884	7.21821001	7.26591165	7.244793645
ILMN_1654637	8.621526748	9.581962388	10.88384963	8.698653808	10.54061902	7.872816656	7.436865843	7.956455476	8.091759929	7.906202315	7.730446382	7.747330624	7.816383187	7.786681116	7.93193097	7.977989866	7.882180217	7.859601605	7.85065428	7.878296542	7.836112141
ILMN_1654639	11.50280151	8.98434154	12.68103575	12.20371414	8.895193408	10.89306654	7.950802526	13.89296032	14.2645849	14.24861775	14.53549888	14.49113979	12.50269876	13.29679227	13.95576333	14.15364213	13.45290722	13.41093019	14.20164781	13.33852201	13.44548308
ILMN_1654641	7.338109908	7.292630121	7.133019398	7.378475552	7.21236589	7.424155139	7.414443777	7.457522693	7.524089619	7.5705726	7.589370448	7.475546023	7.484394005	7.548492142	7.497424639	7.490036276	7.541759199	7.544234325	7.459237895	7.493326551	7.531765331
ILMN_1654653	11.9691988	7.30413572	7.790214904	11.85585844	8.786902385	12.66117313	12.54387549	11.24344097	11.34999975	11.96845348	11.84852725	11.09996258	12.15038841	11.55129915	11.96814222	11.68984784	12.00652269	11.67074865	12.1826294	12.39820676	12.08047684
ILMN_1654663	7.672753848	7.737520467	7.326046746	7.535052627	7.261585288	7.386442604	7.260140392	7.494927987	7.324784396	7.339572564	7.495973518	7.40081161	7.365931002	7.516006813	7.383353155	7.5378097	7.396128415	7.378477528	7.830823389	7.303422865	7.378773386
ILMN_1654671	7.840511982	7.20611524	7.332375283	7.843356143	7.18790625	7.600648689	7.166958762	7.573546701	7.396224772	7.186387753	7.485780999	7.226089754	7.486535305	7.559172251	7.803014245	7.544338428	7.426121904	7.563929912	7.247896743	7.673373938	7.642082147
ILMN_1654672	7.335083746	7.295627472	7.355987163	7.464547198	7.220670667	7.284303725	7.202707656	7.276960828	7.304701315	7.29714523	7.27675025	7.329279342	7.354495145	7.470826982	7.363043957	7.370438382	7.272945682	7.337066785	7.364831487	7.279417377	7.306467475
ILMN_1654673	7.331057928	7.274838047	7.1876742	7.27670631	7.188601703	7.291701469	7.224816851	7.319783977	7.292980188	7.325800955	7.366778838	7.181734683	7.267372944	7.251470988	7.251509746	7.320404101	7.272001113	7.347520204	7.414665185	7.371750205	7.288442537
ILMN_1654677	7.279440561	7.296151954	7.315080763	7.386737792	7.227980979	7.958900017	7.208018167	7.2596823	7.564273314	7.665571012	7.452382176	7.724007205	7.627156548	7.371456676	7.316524575	7.323455457	7.50092843	7.750912607	7.884541715	7.698081645	7.581928501
ILMN_1654685	7.205642014	12.27177417	7.338504671	7.226230665	7.20655531	10.78277012	7.206320317	10.28780455	9.910070907	10.19860244	10.74055942	9.895442868	10.25247397	10.52805528	9.749082204	10.65186259	9.65429718	9.888346336	10.29160913	10.00139049	9.900799897
ILMN_1654689	9.280053296	9.417158536	12.73254878	8.834768556	8.806612791	10.69495935	7.646991069	11.78441146	11.70786706	12.27535052	12.06954596	12.15102655	12.18831015	12.34504473	11.68147403	10.71248304	11.5897729	11.8781803	12.34129547	11.83898403	11.65623778
ILMN_1654690	11.71313286	7.219448763	7.231372231	12.12398742	7.217950425	14.27258528	10.34125667	13.07408891	13.16502402	12.68080288	13.383337	13.08917152	13.71469169	13.00305102	13.51032171	12.56073123	13.32676635	13.18898113	13.32174602	13.9181976	14.09074488
ILMN_1654691	7.691912896	7.517599965	7.350026509	7.922561247	7.257615423	7.985389927	9.485693564	7.646813434	7.39141099	7.477465124	7.498875677	7.524026343	7.576187144	7.5862753	7.684494733	7.500697683	7.662228356	7.711848085	7.738773809	7.772136285	7.799376549
ILMN_1654692	8.979982397	11.47240387	7.348767532	7.30238437	7.223778868	9.509123376	7.234733417	8.653383282	8.534570566	8.446833386	9.1913358	8.080930766	9.057425617	9.169322503	9.108909307	9.157309839	8.365580886	8.743295054	8.883429142	8.728846447	9.02844632
ILMN_1654696	7.287906898	7.300690264	7.393124801	7.216531128	7.234337818	7.643610967	7.253118565	7.677442906	7.266878282	7.917001598	7.42188581	7.298303108	7.645365146	7.231440073	7.928182936	8.297260355	7.230956663	7.853023252	7.812094145	7.375992537	7.426664943
ILMN_1654697	7.952030196	7.828753562	7.350067817	11.90580303	7.614097917	9.676491191	7.53156211	9.595697659	10.02827399	7.716892658	9.74768444	10.64889909	10.22077678	10.11082445	9.7022849	7.65675511	10.07706856	8.605643283	7.647602779	9.083935622	9.869235334
ILMN_1654703	7.288395657	7.268472149	7.340095935	11.75939745	7.671480122	9.159625403	7.329367798	10.48070332	9.918558147	10.35109052	9.713475972	10.41530071	8.90856908	9.051658634	9.159332317	10.22646811	9.169657234	10.35586763	9.871624357	9.001038169	8.829603673
ILMN_1654721	7.605063069	7.293629853	7.457526743	7.46839792	7.225960396	7.387925338	7.238610132	7.377137154	7.405223974	7.342638557	7.438264562	7.455934139	7.400372177	7.46709613	7.362508395	7.376339241	7.323818326	7.374684331	7.351740156	7.464997438	7.428426367
ILMN_1654722	9.984744381	12.17871752	7.336602868	10.5969387	12.82761192	11.1336767	7.324710378	11.68811971	11.22203974	10.73830188	10.23513491	11.29631092	10.90389952	11.70340541	11.10546784	12.19083188	12.4573474	12.04153061	11.71189639	11.89730634	12.00150384
ILMN_1654726	7.291734559	7.267130438	7.361574089	7.293993259	7.218057173	7.29904609	7.198997712	7.289346022	7.292448145	7.299061952	7.255440907	7.294382813	7.192821901	7.275009479	7.2686772	7.225639116	7.293159403	7.279633173	7.290567717	7.278526329	7.254554706
ILMN_1654732	7.283457119	7.296622221	7.306173805	7.230769497	7.219738797	7.37040177	7.20443082	7.29474673	7.246478944	7.277640653	7.27819922	7.31675649	7.315312403	7.237563742	7.300987586	7.373064109	7.179730692	7.335572546	7.215656211	7.276598437	7.213031781
ILMN_1654735	7.729606104	7.288529925	7.349208256	7.606595555	7.448313468	7.440449762	7.218244194	7.416796172	7.458302773	7.502680274	7.452139856	7.527309431	7.455863037	7.475318394	7.412790597	7.559569735	7.424945857	7.439936009	7.420520977	7.450171545	7.543007547
ILMN_1654737	9.941098442	11.7282684	7.333535875	7.274072232	7.218115247	8.900907096	7.178542063	9.053114043	9.397738751	8.603480882	9.843191084	8.900472358	9.502951732	9.809671713	9.928179203	9.178990237	9.983333273	10.09564927	9.90263203	9.522383353	9.449074735
ILMN_1654742	7.301642808	7.347978624	7.540186188	7.261145351	7.277719703	7.251758016	7.879077854	7.316009261	7.275234475	7.437784759	7.351459247	7.244031103	7.309671773	7.295621237	7.30523091	7.297164222	7.367996456	7.23207701	7.249950088	7.315207355	7.353124244
ILMN_1654759	7.298562635	7.328306984	7.500132088	7.792391415	8.347700677	7.395368545	7.195017463	7.381923159	7.412124786	7.52644194	7.359717306	7.453727303	7.355384814	7.471960472	7.332421844	7.474040777	7.367088191	7.440655154	7.385603372	7.422527631	7.420933076
ILMN_1654766	7.207825038	7.252934094	7.303433499	7.480752973	7.646253465	7.389417834	7.236374679	7.793858904	7.558939154	7.307242918	7.67462972	7.702490744	7.585370013	7.802049639	7.642529531	7.718943204	7.624596889	7.598117226	7.589784928	7.48439284	7.636337077
ILMN_1654771	7.400485695	7.247450829	7.276603782	7.233851812	7.207335102	7.576061463	7.730089926	7.46883629	7.563329599	7.473353236	7.384372798	7.5542328	7.367009883	7.515393834	7.415224539	7.497885249	7.448905337	7.471901818	7.447687885	7.524590473	7.43407377
ILMN_1654772	8.874469428	9.849147116	7.746007223	9.850932889	9.960329381	8.996841104	11.3475623	8.400456169	8.621773743	8.094223049	8.665891083	8.378360774	8.641260799	8.273010444	8.176975769	7.894564732	8.44205323	8.541311545	8.450511671	8.810441502	8.609098734
ILMN_1654773	7.362635858	12.27280414	7.361109224	7.716833656	8.934256575	12.67289988	7.210655674	10.65047064	11.43000403	11.62100419	11.819405	11.61228754	12.17958939	12.06006803	12.21588014	9.654831618	11.50917033	11.56445737	11.81361269	12.46267893	12.32987463
ILMN_1654778	7.62453242	7.29980497	11.9258322	11.95668716	8.580785131	12.6293626	8.213603296	13.35401657	13.54378812	13.43129517	13.70113603	13.58927297	13.54314362	13.09140199	13.73354003	13.87466278	13.3149964	13.44474359	13.33205149	13.11578702	13.22860407
ILMN_1654779	7.880991545	8.44064097	8.476865734	7.848724361	9.946752227	7.486698195	9.118454764	7.491836386	7.618058552	7.649260714	7.51390204	7.561697074	7.487475066	7.454894048	7.526049608	7.488314012	7.614712949	7.588665798	7.520947794	7.518826897	7.498206575
ILMN_1654786	7.207254816	7.193145489	7.026061957	7.232209305	7.207263477	9.824326426	7.19383642	11.099525	10.86073417	11.1060763	10.78906199	11.37380519	11.07814367	11.05608559	10.98488378	7.227681434	9.042680706	11.19108517	10.83003437	10.87582422	10.32991209
ILMN_1654792	10.73016669	7.432503649	7.682873595	10.87690716	7.972514405	9.621190947	7.219698521	9.934326411	10.02819348	10.00671081	10.36960394	10.06651512	10.44992669	10.17234177	10.76671941	10.5982892	10.10842431	9.949313502	10.08736305	10.03241811	10.29275169
ILMN_1654812	11.17173814	7.264253807	7.267627248	11.24147753	8.110629791	8.818672033	7.194989432	11.45325712	10.92562623	12.20874649	11.87807603	12.03581149	10.06426805	10.59463991	11.70783792	12.17943485	11.62924968	11.02435803	12.17594612	10.3952705	10.1568678
ILMN_1654819	8.799481103	11.43887703	11.43104509	8.353471553	11.48178877	7.939584166	11.88130282	7.75325769	7.770538516	7.723352088	7.597269552	7.626232453	7.688059691	7.774608486	7.558453268	7.546366647	7.541154044	7.53544899	7.689514147	7.642988444	7.781115054
ILMN_1654823	12.38108933	12.64051088	13.08800693	12.48416526	11.26858088	11.63797828	11.51259341	12.09108751	11.13478554	12.22208164	12.22905136	12.56399355	12.26501327	12.04485609	11.40853266	12.66562717	11.19828233	11.17792836	12.2998808	11.2918988	11.52701586
ILMN_1654851	11.1513856	11.72932408	11.8893024	11.73058492	7.226350543	10.4361993	8.608291278	10.76421475	10.60014686	10.76806468	10.43476218	10.78018277	10.15563792	10.67447901	10.38931809	10.58500513	10.34944712	10.73786422	10.60037203	10.36312675	10.34786206
ILMN_1654854	7.221387857	7.225288511	7.207951689	7.250387055	7.193834928	7.615705317	7.156771924	10.29653076	7.227736276	7.272610678	8.067489298	7.221155618	8.335717209	8.148366014	7.877305407	7.182300632	7.222490844	8.128175461	8.303226779	8.702659793	8.462063985
ILMN_1654855	7.348727882	7.280766145	7.35361261	7.324898571	7.21465654	7.319102632	7.177701828	7.390922638	7.400716409	7.526770375	7.447934117	7.452574939	7.415391094	7.398573279	7.36646658	7.536860539	7.363824074	7.438408367	7.419856051	7.413226709	7.418084458
ILMN_1654857	7.205143829	7.295883634	7.266773659	7.361096243	7.219879585	7.249764056	7.20519361	7.247775474	7.344403748	7.251362568	7.282946086	7.311387519	7.268440076	7.238768795	7.225545564	7.296361188	7.218440592	7.225612584	7.331646242	7.267310072	7.302951951
ILMN_1654858	9.683433913	11.65749681	7.176257311	7.26926694	7.214575392	9.206484716	7.186557446	8.506041833	9.72105124	8.919852371	9.90995648	9.392956749	8.91279533	8.734629076	8.992864612	9.184204541	9.292178882	9.451113779	9.361255034	9.085281963	9.01802422
ILMN_1654861	13.76064998	13.22109799	13.40290443	13.42928135	13.06013654	13.56366274	12.86195374	14.0056377	13.77303063	13.44174562	13.51462109	13.85496063	13.39362895	14.01813072	13.57833633	13.44293608	13.59182036	13.93383737	13.22380191	13.82177605	13.79880335
ILMN_1654864	11.05144297	7.205109142	7.003165031	11.67244016	13.18248122	12.20731182	7.150727748	11.92693757	11.92605694	11.48549849	12.19330412	11.60362381	12.19271138	11.90049107	12.28064614	11.19950082	11.98589756	12.0145181	12.35800623	12.70488438	12.58867162
ILMN_1654866	7.428362134	11.13959861	7.265393619	7.442776036	7.481521118	9.239829395	7.20845912	8.754245462	8.686375358	8.571404194	8.654270745	8.220698442	8.697207418	8.54761957	8.492262138	8.613935924	8.4788676	8.908818519	8.519344215	8.775330289	9.111892928
ILMN_1654870	7.443853887	7.2903697	7.31339687	7.317263131	8.166326259	7.32454594	7.631916541	7.369124429	7.322813146	7.435123401	7.261412557	7.341809891	7.322542106	7.217884001	7.187248771	7.323917113	7.313560244	7.269604718	7.213743777	7.278067398	7.329642147
ILMN_1654871	7.898094893	7.294842653	7.446848386	7.693626667	9.328461816	7.485042755	9.451773692	7.429863403	7.538731873	7.598451081	7.435940983	7.462693235	7.467161672	7.513932024	7.418631644	7.490310268	7.462564988	7.460766549	7.497102916	7.474918077	7.431286755
ILMN_1654875	8.17236553	7.465348354	7.742209265	8.098602719	7.226137727	7.718814336	8.281064995	7.703624964	7.674149413	7.738223224	7.797347272	7.594947816	7.616652326	7.643959497	7.667811416	7.734356939	7.834918992	7.630655761	7.561806614	7.635658503	7.688651271
ILMN_1654890	14.01600017	12.56923055	13.37902581	13.6367223	7.183923584	13.86398177	7.308050464	14.69762098	14.91259744	14.80056903	14.47901897	14.78211741	14.384962	14.73811825	14.85599359	14.75835317	14.62685024	14.68419569	14.63612083	14.36600944	14.38929963
ILMN_1654893	12.52012934	7.296869634	7.333752283	11.74294109	7.319855248	11.65981367	7.432872898	12.57222766	13.04008659	13.20327914	12.93071584	12.81028699	12.35216095	12.37703363	13.13297341	13.1850334	12.99857166	13.23354439	12.87703294	12.52410426	11.96393025
ILMN_1654895	7.316658082	7.226422945	7.267963062	7.267680695	7.165715885	7.386037914	7.328018399	7.295917593	7.253446423	7.277636577	7.274639962	7.234855109	7.276549199	7.300523089	7.253000352	7.331007263	7.28974016	7.217701912	7.246497128	7.29960817	7.295854476
ILMN_1654899	8.042764595	12.20342162	7.947613943	11.79833938	7.842042539	7.604180091	10.27898249	7.638134011	7.64198204	7.663682792	7.59538954	7.557855184	7.647208881	8.659587689	7.570355464	7.603715886	7.597288023	7.573069362	7.685291144	7.677894137	7.590135109
ILMN_1654900	7.73145653	7.340634273	8.080696747	7.524983794	8.153089709	7.544879378	7.206501996	7.576918619	7.51647628	7.626862797	7.412456321	7.571397739	7.422389432	7.481541517	7.432797234	7.51364353	7.525063213	7.50570691	7.498442248	7.45965312	7.428620597
ILMN_1654915	7.611020878	7.772055787	7.468381922	7.359090444	7.671132449	7.384111765	8.710714248	7.327234212	7.42274161	7.38404644	7.387680751	7.409285022	7.439322751	7.489832602	7.434985717	7.368665781	7.337481065	7.350724989	7.424824723	7.360202506	7.296822106
ILMN_1654916	11.65540703	7.308764076	7.335856092	11.79818841	8.221573023	12.52266097	7.24743345	11.78602749	12.62096053	12.05961309	12.3734689	11.7165351	12.56918485	11.95701234	12.36454778	10.92645678	12.58353158	12.25111647	12.26769236	12.21796815	12.79842382
ILMN_1654920	7.36862603	7.28656451	7.191810924	7.371925049	7.181723724	11.34554724	7.210782341	12.35896448	12.42759858	10.94194371	11.95545212	11.78128692	12.07970548	11.85166167	12.02836141	11.48199583	11.93191292	12.09952609	11.85254835	12.72843647	13.17493329
ILMN_1654922	8.09151614	7.349678662	7.483923166	7.476237502	7.227325125	7.464257251	7.174109921	7.392367784	7.727797428	7.516648707	7.381026826	7.477905538	7.457777557	7.574241002	7.440456297	7.435196766	7.554881708	7.388612456	7.47878091	7.465828502	7.464989933
ILMN_1654939	10.86227509	7.278520547	7.246851869	11.82517514	7.261553483	13.28631123	7.211041447	13.09325565	13.05597586	11.6728672	13.0155252	12.58284792	13.28765209	13.0482544	13.14169977	12.71250076	12.94649165	13.2102348	13.02778714	13.47813381	13.45416428
ILMN_1654942	14.13488361	13.58134916	13.9618993	13.9568708	13.42513313	11.95684836	13.44230702	13.54730304	13.26220818	13.80936054	13.36819412	13.46590906	12.83971147	12.89544616	13.0207251	12.87561016	13.33371988	13.22858757	12.95072053	12.54282153	12.21458295
ILMN_1654945	11.88896445	13.05529035	12.70023875	12.13733275	13.38641886	10.08879622	13.39550292	9.657749521	10.22430927	10.6005085	9.84358167	10.21448073	9.981863099	10.92435119	10.15589564	10.56838502	10.03086734	9.828580446	10.17897364	9.959533727	9.633138109
ILMN_1654946	9.622493361	11.51993746	10.13843718	10.11966808	11.14669558	9.315525462	11.92589542	9.113211168	8.81775894	9.106647371	9.917731495	9.588640049	9.504791698	9.052163311	9.84804368	9.395007411	9.822331721	8.766233058	9.016109978	9.192192726	8.777074178
ILMN_1654950	7.580622418	7.297043953	7.47880739	7.335912092	7.222026919	7.322385574	7.237332538	7.46903881	7.27263917	7.31604298	7.310500265	7.381157673	7.320085647	7.401623304	7.315092965	7.287781984	7.346898335	7.374646143	7.251809809	7.415855761	7.394989807
ILMN_1654965	7.974024766	8.948784089	8.362431836	8.020448711	9.184140279	7.562165264	8.484944731	7.580054741	7.7099114	7.544050824	7.48467734	7.442396655	7.467508055	7.538661921	7.573525463	7.717300031	7.52628041	7.542872343	7.524939036	7.468036472	7.602341959
ILMN_1654966	7.249002821	7.169679046	7.34192175	7.327900109	7.219841592	9.992130518	7.201594735	8.30625719	8.220033913	7.186800055	8.284871378	7.677556779	8.924089174	7.2321175	8.36198669	8.954915818	8.707913662	7.877945005	8.719964189	8.611378843	9.293574433
ILMN_1654973	8.570845136	11.23277416	10.55038674	8.771180254	11.49171337	7.571695597	11.88670928	7.639514166	7.698647821	7.72151927	7.465855342	7.569251023	7.589757139	7.528568084	7.671839143	7.65144164	7.518783799	7.45931953	7.563211049	7.532643275	7.502608538
ILMN_1654979	9.214869161	8.048484718	9.952887089	9.461082283	7.344878546	8.142748894	7.602509832	8.257250241	8.403557462	8.262149723	8.140240088	8.199223351	8.071115869	8.212579394	8.089891135	8.080274098	8.010828513	8.127352239	7.917617891	8.133733276	8.022405455
ILMN_1654980	7.208549494	7.204517098	7.133694256	7.265142031	7.183046914	7.226745813	7.182095588	7.257538523	7.274015188	7.166163487	7.199591843	7.254533974	7.129848312	7.979958072	7.545502747	7.148130969	8.183669294	7.269645105	7.154079616	7.240968857	7.1643051
ILMN_1654987	9.376174034	8.068631893	8.222039833	8.422609856	7.239010059	8.001524516	7.252451583	8.260718103	8.50870354	8.14635398	7.713914842	7.785652552	7.943426644	7.900683102	8.444152768	8.006545742	8.04605072	8.347677875	7.592444476	8.085119786	8.119512037
ILMN_1654997	7.352325188	7.252776924	7.233182426	7.23993036	7.201592243	7.414406131	7.199738532	7.432123277	7.403471441	7.490596978	7.415073903	7.407560718	7.427229972	7.726970859	7.355726617	7.322025451	7.424286745	7.359753031	7.352948794	7.414567829	7.398818935
ILMN_1654998	12.4210378	13.38223874	12.55063649	12.38128327	13.6889083	10.81132633	13.07706697	10.51418572	10.68490415	11.30668211	10.76986792	11.14049321	10.58425594	10.62092197	10.59604274	10.59265338	10.16814795	10.47475956	10.92563218	10.54970928	10.14220564
ILMN_1655011	7.31904751	7.359963783	7.329259567	7.350022675	7.203783384	7.383733756	7.203962502	7.595803883	7.339232645	7.386439897	7.267946446	7.339016477	7.439211754	7.27462266	7.378008273	7.365431681	7.415717231	7.368288326	7.367091471	7.304077896	7.307719242
ILMN_1655026	7.296382383	7.283643022	7.370746682	7.314498052	7.595788145	7.430744683	7.206335114	7.331962625	7.363083094	7.342362234	7.35752602	7.322220444	7.467240912	7.547471166	7.425638717	7.489739439	7.39763052	7.427384253	7.358953131	7.460037196	7.37737039
ILMN_1655039	9.267299283	11.64491118	10.68970924	10.104144	11.46335489	7.671588104	11.83045841	7.77192798	7.676131336	7.471972548	7.495699244	7.754638249	7.672021382	7.665706159	7.68994545	7.881688084	7.624810643	7.649308974	7.582431847	7.673242896	7.731881634
ILMN_1655045	7.205123847	7.287103918	7.305015805	7.22781429	7.211458187	7.208382714	7.200886812	7.309747466	7.27983938	7.22030461	7.219919922	7.136375852	7.266379436	7.25181507	7.230135274	7.214891666	7.220824446	7.180141529	7.312662111	7.184627678	7.19240009
ILMN_1655046	11.09380618	7.336261903	11.87449958	10.21469027	7.253610736	8.311963016	7.213291374	10.00378793	9.606920859	10.61371856	9.436693409	9.656913681	9.031046413	9.109820421	9.415485739	10.18057629	9.181492953	9.663437165	9.429279149	8.713891249	8.544293973
ILMN_1655047	8.080791761	7.71999556	8.769458586	8.693985257	8.433701241	7.590968262	9.713278341	7.746689599	7.685011571	7.646566817	7.574263859	7.589955219	7.554100625	7.647277418	7.586661873	7.584562847	7.671392648	7.669867294	7.676257051	7.600264255	7.640854517
ILMN_1655051	8.25712662	9.757798442	7.368299368	8.878637124	9.262726412	8.142330819	7.459610407	7.809104317	8.000007681	7.993217096	7.794290109	7.93093898	7.986076949	7.935997491	7.952978639	7.940626188	7.954195562	7.763886722	7.950223291	7.88482955	7.790571172
ILMN_1655052	7.997232495	7.340790838	7.385910573	7.650563351	8.778519518	8.360662776	7.217621095	8.13782181	8.129853745	8.462377257	7.999435078	8.013743965	8.079086621	8.013991977	8.396689178	8.397608565	7.955330755	8.185289616	8.173929211	8.590619233	8.335189611
ILMN_1655068	12.12295833	11.66011644	7.345123236	12.06665376	12.55451189	13.35899381	7.215433017	13.39389386	13.37283384	13.18451692	13.30626027	13.2912216	12.9669415	12.87294397	13.57873961	13.72997891	13.27315036	13.56859192	13.449862	13.29624553	12.92648383
ILMN_1655077	7.291001349	7.233208025	7.263055912	7.21484045	7.209841512	7.303751955	7.207556777	7.327385369	7.278115904	7.278149864	7.250226412	7.302118897	7.378031242	7.360581766	7.389432715	7.246822529	7.287000336	7.37298823	7.180123308	7.327664382	7.393756728
ILMN_1655080	7.422970676	7.293855108	7.346395131	7.219683609	7.225698202	7.293751958	7.215721186	7.370658629	7.325630279	7.291033698	7.368133563	7.295703466	7.26818889	7.393785867	7.319066852	7.322344537	7.306882889	7.265560448	7.299224925	7.31563864	7.366779044
ILMN_1655086	8.964010251	9.562511588	8.841824731	8.759842455	10.48118993	7.960173377	11.15193106	7.990293211	8.036422411	7.971771969	7.849295894	7.817260007	7.728205093	7.70462879	7.936175834	7.839959927	7.838973735	7.895238629	7.857390867	7.859808974	7.825336055
ILMN_1655093	7.280643577	7.302133605	7.470035291	7.281059527	7.226734248	7.323662484	7.863042263	7.350896406	7.317834262	7.404864804	7.290410062	7.370609182	7.298408968	7.279368457	7.30311248	7.395683552	7.444403439	7.266722569	7.295766197	7.278951505	7.321420447
ILMN_1655095	7.34098534	7.312518161	7.401820087	7.427272756	7.225746259	7.38219792	7.210294817	7.449950838	7.400141079	7.54345607	7.452619459	7.413474539	7.420151562	7.453727429	7.397374112	7.40995513	7.486349714	7.438738496	7.437730185	7.423434235	7.321921238
ILMN_1655096	7.54908559	7.308995804	9.699494654	7.787393829	8.492318297	7.557565931	7.323730357	7.480065655	7.530672179	7.597609937	7.401127423	7.570795481	7.443390694	7.48694192	7.561952621	7.54571165	7.48019494	7.575454214	7.5612782	7.545443854	7.475249177
ILMN_1655100	7.236010817	7.245327341	7.194399542	7.234979896	7.226265667	7.257005956	7.21186848	7.337047933	7.297264339	7.278981945	7.296915717	7.280309409	7.330479124	7.302734686	7.275228272	7.346692839	7.279539019	7.278249304	7.279540563	7.288921967	7.276992897
ILMN_1655114	13.07451553	13.59822064	13.29319055	13.57914154	13.79184044	12.05654014	13.52355874	12.90424458	12.67089019	13.15594665	12.84874467	12.89573463	12.86029356	12.30377048	12.60619852	13.00958841	12.29919271	12.03966005	12.76592258	12.0008475	12.10805406
ILMN_1655117	11.41676671	7.291895726	12.40399168	7.278150275	7.227855023	13.07790787	7.210541479	11.96239175	12.71093413	12.65913505	12.47533885	12.46426653	12.85628173	13.34010165	12.83736966	11.31707481	12.61539366	12.96788038	12.88096246	13.57052204	13.57798328
ILMN_1655126	8.128701439	7.468178005	8.613993475	8.299379661	7.22446897	7.83836022	7.335049164	7.665822846	7.638031343	7.763365661	7.750651094	7.704453129	7.625835199	7.636031736	7.620300207	7.717475696	7.678547065	7.699039972	7.676484958	7.574487589	7.551256635
ILMN_1655136	7.5451253	7.535822741	7.510619733	7.411304011	9.056514845	7.399696734	7.25978071	7.370469632	7.455856126	7.484540972	7.349920812	7.495884139	7.414069492	7.43135526	7.366158352	7.329204072	7.434313659	7.383270885	7.45276593	7.441100746	7.390135825
ILMN_1655137	7.211483085	7.265195175	7.268026877	7.247217971	7.215770127	11.1686753	7.179408142	12.20492033	11.99484672	11.81006602	12.40385948	12.18258793	12.06359942	12.43996633	12.13025872	11.89399055	12.30206345	12.29799261	12.57008663	12.2932642	12.6040166
ILMN_1655140	7.225118857	7.220539712	7.282977623	7.336220822	7.276024979	7.31398589	7.211328649	7.252149978	7.31346996	7.326451517	7.276189841	7.194840102	7.307554976	7.319181836	7.381507113	7.284540111	7.282949977	7.284523299	7.302381173	7.241473552	7.236700567
ILMN_1655144	8.070574653	7.321902325	7.354459663	7.901486408	7.217275243	7.549016313	8.150078723	7.737790676	7.841198329	7.711582922	7.601377868	7.640385766	7.527886382	7.808244748	7.620359796	7.693410548	7.730636029	7.761204187	7.547046317	7.613787205	7.629973711
ILMN_1655151	7.408668385	7.333700659	8.115576796	7.57137468	7.296375785	7.530906607	7.268934614	7.583161371	7.510585174	7.641387524	7.485666474	7.50682073	7.424949625	7.558392724	7.512331814	7.504661372	7.502585663	7.473934488	7.750645899	7.50246127	7.482914999
ILMN_1655154	15.28191677	14.03151085	14.09110598	15.06443118	13.63840561	15.05214213	13.52868269	14.85873358	14.88963221	14.50522246	15.22382127	14.77815047	15.02031643	14.64498299	14.83351662	14.71376951	15.04200152	14.86151631	14.86943666	15.083046	14.86050988
ILMN_1655155	7.554469292	7.310602254	7.483520865	7.402480665	7.251493742	7.567852721	10.10908518	7.467216312	7.595476824	7.52472108	7.482128072	7.44542065	7.443042271	7.523934021	7.497603687	7.491239746	7.475238362	7.475123505	7.499045596	7.475557331	7.481691052
ILMN_1655161	11.59397004	7.181936534	12.59469194	11.82501308	7.175574838	11.13960542	7.210968088	11.05358475	9.580966632	11.25130301	9.404446164	10.24329123	9.685656272	10.42829133	8.630854729	9.339338033	10.12716258	10.78439127	10.11159274	9.49236103	9.591715881
ILMN_1655162	7.236227074	7.258424148	7.388560966	7.312776667	7.202543976	7.423392937	7.195962153	7.322435023	7.296359955	7.257530227	7.229864295	7.374391624	7.278399759	7.270566709	7.31565068	7.230070538	7.274340495	7.308997297	7.263714776	7.309349986	7.250629145
ILMN_1655163	11.69975386	7.280988834	7.238262301	11.94895378	7.374325689	12.98539953	7.490924236	11.36306502	11.67106377	12.08394893	12.11502178	11.56732582	11.82676529	11.81590942	12.18651984	11.57531761	12.34035074	12.11632688	11.79521701	12.48386865	12.43999006
ILMN_1655165	7.241964988	7.272858196	7.35095179	7.237886765	7.225249195	7.859101283	7.341897252	7.940975773	7.721199279	7.676323343	7.731029928	7.84429739	7.860388611	7.991361281	8.173411813	8.199476755	7.938374083	8.078377433	7.830370164	8.248553707	8.281377557
ILMN_1655167	7.200812385	7.208728868	7.33597482	7.350539984	7.249870281	12.51138314	7.204967107	11.92822058	12.24791281	11.10880998	12.17864954	11.8193821	12.17787584	12.18799478	11.62024243	11.12624049	11.96643076	11.5245322	11.82873283	12.55056596	12.59138324
ILMN_1655170	7.391133627	7.298311623	7.34792116	7.308706038	7.27053863	7.375833887	7.240164003	7.449077107	7.480751865	7.513916174	7.471097596	7.510296384	7.458237472	7.446610384	7.478615363	7.437363365	7.431134619	7.440920985	7.445874228	7.445761835	7.448481523
ILMN_1655171	9.661642885	7.247605307	7.290921907	7.222822491	7.180330374	8.363738305	7.177548375	10.85060487	8.416631853	7.201671906	10.06899721	9.98985497	9.714863381	7.158506012	8.709437387	10.22512426	9.765947944	8.484690926	10.30577091	8.991464036	7.856258355
ILMN_1655177	7.218578343	7.255074808	7.293600487	7.296192454	7.209639699	10.38446167	7.195712928	8.442220956	8.516605134	7.767333215	9.337219069	7.848244162	9.545057609	8.184701021	9.084704106	9.114586898	9.388149277	9.551588833	10.04867357	10.44139922	10.16559293
ILMN_1655190	8.581270914	8.085647871	11.13316765	8.839962456	10.66614855	7.76817179	10.92486376	8.076387746	7.910134656	8.037025194	7.744791391	7.857303585	7.642126245	7.779993178	7.821186665	7.902584347	7.753278771	7.928254013	7.849845764	7.84837619	7.865010938
ILMN_1655191	12.039394	7.241742975	7.224038801	11.79381218	7.217951953	12.58486798	7.220427006	10.57829251	11.11454862	11.11403111	11.25214509	10.66541824	11.43871504	10.73060829	10.94331388	10.52765697	10.92040047	10.98789065	11.15003304	11.59864724	11.27977482
ILMN_1655194	11.04075077	7.993992244	7.533200586	11.34728377	9.51434755	8.98200001	7.268442827	9.304719647	9.062409176	9.967222577	10.62246018	9.783676137	9.188457249	9.603746954	9.815583555	10.24798254	9.677981602	9.571501734	10.0371856	9.394047679	9.28724062
ILMN_1655195	10.34276454	11.53257125	11.82691604	10.12186345	11.43384877	8.479241331	11.89415763	8.79374465	8.688961591	8.857840988	8.432457328	8.515699669	8.264208834	8.259895212	8.596815661	8.627982072	8.518831014	8.420887537	8.468284669	8.334078867	8.366469598
ILMN_1655196	7.297249959	8.107618977	7.414444764	7.488626572	8.846387185	7.501037697	8.585038073	7.500709139	7.448284115	7.577300465	7.522781994	7.48806114	7.450830554	7.476393163	7.49139088	7.526859103	7.448673586	7.49045562	7.482159708	7.527626173	7.514687651
ILMN_1655201	7.909589735	9.985424179	8.89440949	8.02508491	11.07033784	7.506441452	10.37875083	7.599436774	7.642370554	7.686257135	7.587342698	7.578569639	7.649551342	7.571743225	7.55251524	7.617721067	7.57642021	7.559135789	7.540394872	7.568547507	7.523021931
ILMN_1655206	7.425964764	7.300624861	9.34822411	7.319105449	7.224573587	7.57324117	7.203726073	7.543645882	7.596893296	7.45464734	7.562724395	7.481648441	7.636019118	7.609479225	7.49817208	7.590562026	7.53310382	7.564005155	7.474804889	7.510009247	7.554110483
ILMN_1655210	7.213905892	7.258772278	7.245267904	7.249157823	7.224587769	7.203753403	7.204227643	7.315856741	7.255307012	7.248808267	7.318039119	7.304927627	7.303365814	7.216770226	7.22735799	7.169843776	7.228719448	7.2837671	7.307012492	7.328812068	7.318214777
ILMN_1655211	7.249403634	7.236331206	7.268426045	7.24675758	7.224459693	7.270039585	7.158179727	7.344897596	7.219482979	7.333959884	7.29971141	7.244627923	7.311171331	7.171529441	7.292273993	7.207745572	7.241292778	7.299532062	7.23557105	7.307677079	7.230996846
ILMN_1655218	7.668753486	8.289617588	7.49436838	7.593681024	11.2872679	7.308207028	10.13562702	7.381084236	7.305420741	7.379310411	7.442580421	7.484205239	7.29993712	7.374759429	7.55708706	7.374838821	7.449380501	7.405571759	7.450483657	7.354868852	7.400051492
ILMN_1655225	7.474351107	13.43514354	7.34536558	11.89315313	7.220806427	12.58680632	7.213548912	12.04507873	12.3795649	10.26457266	12.30321401	11.2906516	12.22587745	11.38748432	12.5250415	11.79901603	11.00534329	12.03932359	11.85874842	11.98453996	12.10257191
ILMN_1655229	7.225172673	7.253976857	7.342187831	7.252984315	7.155948279	7.712054892	7.161797108	7.211257871	8.225343954	9.094895302	7.684645306	7.216374206	7.637538429	7.068252132	8.082624638	7.154055486	8.020206405	7.9116563	7.265818285	8.091198418	8.09514141
ILMN_1655230	7.431652564	7.286049776	7.375873388	7.702604664	7.226389689	7.598817846	7.220624052	7.974680067	8.116853419	8.229657567	7.840712411	8.155824076	7.782214481	7.920756665	7.888575364	8.19775306	7.988674574	7.852863357	7.996798168	7.731171382	7.638937255
ILMN_1655240	7.599860301	7.631388723	7.379422935	7.594428592	9.488597897	7.47657773	7.575316193	7.517807254	7.513666818	7.416924233	7.534456379	7.551042417	7.481848775	7.521509098	7.529477367	7.546044464	7.519199817	7.578118946	7.545031564	7.476569964	7.51535128
ILMN_1655241	7.879743935	9.545426288	8.50676585	8.078220892	7.228549408	7.655368941	9.130470669	7.738315455	7.72013339	7.59683827	7.753239681	7.523046277	7.847363691	7.593857571	7.677155812	7.855263826	7.839721633	7.829281273	7.776486881	7.763540365	7.908507218
ILMN_1655244	7.581168705	7.229593981	7.33539357	7.479930831	7.273246948	7.706220026	7.438017955	7.496495729	7.676086644	7.53753669	7.606163998	7.59363486	7.639967863	7.524465656	7.626863286	7.527141735	7.551732379	7.617778204	7.747037078	7.642839967	7.667719122
ILMN_1655245	11.86793748	11.84004844	12.10829618	11.51549719	11.25837782	11.20882429	10.84792638	12.58055639	12.89259934	12.73513837	12.17191756	12.82090693	12.2781051	12.69830737	12.31484435	12.5951529	11.98057439	12.51778962	12.40864664	11.99175537	12.11169494
ILMN_1655250	7.280037852	7.27081785	7.292383546	7.243516259	7.223077785	7.290688927	7.200114616	7.214422106	7.293492857	7.329157637	7.395285815	7.285651779	7.143633131	7.212927185	7.317900789	7.285483495	7.225954277	7.26631303	7.28254722	7.241760413	7.227046138
ILMN_1655251	7.30387802	7.606397315	7.215701267	7.272721801	7.215764559	7.296942361	7.210895847	7.288690055	7.272562056	7.287926973	7.293984328	7.322714555	7.23852222	7.239899061	7.247717291	7.429706655	7.244908145	7.19285762	7.304758476	7.18004876	7.214034276
ILMN_1655261	7.232289494	7.305691175	7.34689262	7.341629643	7.225633363	11.24921616	7.213156603	10.48084388	10.17728442	10.41060766	9.698760531	9.31980045	10.00405508	9.889064676	9.666223598	9.425509864	10.52504859	9.367849126	10.02849558	11.75585504	11.48448954
ILMN_1655269	7.368095516	7.289799943	7.498682791	7.649201848	8.025295226	9.844842581	10.60301732	7.458323141	10.56238819	11.26531035	10.07837639	11.27577951	11.06238764	10.56253538	10.80346384	9.861853753	10.40108239	10.1945861	10.60263591	9.720277962	8.996328746
ILMN_1655272	7.231444011	7.259626456	7.281956456	7.252538872	7.229454431	9.607045712	7.216299671	9.010879877	7.338827443	10.36418986	8.541423559	9.111836023	9.344738243	9.067856559	8.970269476	7.27269936	8.707999077	9.047163199	11.55980401	9.369072791	8.814188016
ILMN_1655275	7.559934062	7.358737885	7.401385122	7.521362287	7.210500841	7.325761041	7.500623089	7.334962548	7.333904897	7.340701814	7.276202125	7.260140326	7.385908318	7.344924514	7.370244265	7.303806686	7.315926745	7.369416042	7.396646302	7.312426131	7.363232742
ILMN_1655283	7.233647175	7.298204114	7.351980139	7.473007825	7.633147175	7.311149586	7.203966804	7.244397368	7.620558599	8.260519352	7.894183661	7.345957991	7.537504877	7.628585875	8.273140725	7.261116936	7.297832575	7.241047217	8.00425488	7.720586305	7.702993899
ILMN_1655296	8.419183146	10.10523434	8.93833715	11.84718015	10.7216926	13.69360156	10.76644241	13.59050135	13.77788756	13.48848671	13.90519618	13.61120074	13.9347725	13.99027458	13.50893371	13.85222034	13.58972329	13.5081956	13.76970857	13.55450935	13.76339357
ILMN_1655306	7.470639623	8.137168557	7.417285596	7.544714422	7.251405371	7.417646609	8.818382663	7.348618829	7.46824253	7.497676388	7.35151268	7.516858733	7.380872906	7.54057817	7.410890426	7.467440386	7.446400925	7.364919082	7.397469203	7.382106208	7.405864377
ILMN_1655307	7.442066671	7.282169781	7.348850827	11.7067644	7.246402304	13.55391414	7.208499593	12.54973925	12.06194969	11.82806429	12.505396	11.95114061	12.88161435	12.63883277	12.51825689	11.58507044	12.96648815	12.77866223	12.61514807	13.28067165	13.37258385
ILMN_1655311	7.25218895	7.2213151	7.335726432	7.436563808	7.220551501	7.303761581	7.208618094	7.299000219	7.25157811	7.296162268	7.267496091	7.255866316	7.25338781	7.381450762	7.225510131	7.384710771	7.307142768	7.340663017	7.354429179	7.246889476	7.275592841
ILMN_1655312	11.25704698	7.246246404	7.394130058	7.348725145	7.21745254	12.25206265	7.207667299	12.06732361	11.90631817	11.0603483	12.34383229	11.31417666	11.85094426	12.35959078	11.26646393	11.65172738	11.87404103	11.64517012	11.8425192	12.08052293	12.4877097
ILMN_1655316	11.65913528	7.291856077	7.539510288	7.289128963	7.224680461	11.85003289	7.273512931	11.81601261	11.97504727	11.33087334	11.79968298	10.76709716	11.71305525	12.10977756	11.42682713	11.72991265	12.08421217	12.20832085	12.06754152	12.59979931	12.29736091
ILMN_1655329	11.0747223	11.91584243	11.9502582	11.7877245	12.26462108	9.917896068	12.47665734	8.888507433	8.380739656	9.813953066	9.007645443	8.719154652	9.313562233	9.184083008	9.244332532	8.976762943	8.88080839	9.257715749	9.40146913	9.425837468	9.379327739
ILMN_1655330	7.201709699	7.276364587	7.149140855	7.214019664	7.192090112	7.213298159	7.192643038	7.289881859	7.204019804	7.239570569	7.220604861	7.053582339	7.267786821	7.156914279	7.172542137	7.154459857	7.229766408	7.174473032	7.232994038	7.187682459	7.207648524
ILMN_1655334	8.097952561	7.404502487	8.220238151	7.511407275	7.387503933	7.554135891	7.43973145	7.614239387	7.822603323	7.815022743	7.618297956	7.577958237	7.518069817	7.673357	7.580389718	7.548116958	7.53336495	7.57189334	7.573593074	7.511186534	7.603036792
ILMN_1655340	11.85607879	7.32160035	7.344515406	11.564617	7.226925767	13.53065083	7.459765109	13.02447773	12.97807771	12.16490227	13.07901025	13.17965044	12.43417042	13.06703958	13.1953355	12.83858161	12.98035224	13.18857576	13.03737698	13.25245259	13.38823147
ILMN_1655341	11.69611787	7.294377812	7.341919651	11.81547239	7.223153856	9.272047718	7.216030498	8.929314848	9.7683321	10.36956396	9.799194851	9.623421279	9.367615719	8.452428326	9.806945996	10.72247282	8.917627739	10.10905711	8.69308422	9.545554625	9.241946784
ILMN_1655347	7.384808019	12.42888064	7.567338476	7.411017679	7.601036062	7.78401926	13.0089394	7.391371595	7.371474073	10.07063886	8.572080344	7.482155348	8.551375448	7.471068053	7.520177311	10.79466756	7.420852341	8.397619332	7.454436377	8.284415444	7.396204109
ILMN_1655348	7.456049995	7.435832289	7.370554514	7.887597784	9.593777592	7.567000583	7.727236546	7.63363603	7.547619889	7.50399021	7.530962729	7.616997235	7.470383505	7.604964722	7.551966063	7.570932237	7.532204561	7.605785805	7.518934544	7.557685096	7.550125155
ILMN_1655365	7.514814125	7.306868265	7.339308998	7.384316444	7.216079017	7.433264232	7.181423905	7.491642424	7.396179712	7.350451306	7.435897137	7.429028943	7.492648656	7.416895143	7.388923073	7.485396439	7.413720906	7.469737366	7.391268852	7.391772369	7.412829608
ILMN_1655374	7.482433342	12.43905101	7.374971562	7.313493462	7.240476947	8.489635312	7.235103687	7.343799802	7.386607731	10.00133412	7.470785666	8.810281152	8.797318521	10.09595843	8.545867204	8.711858734	8.362847098	8.034343143	9.364992004	7.833710934	7.648167715
ILMN_1655377	11.4653241	7.530476235	8.164686952	11.61559191	7.222845762	11.77761859	7.615942597	11.26095757	11.00159397	11.34242287	11.46999066	10.92484691	11.31421278	11.68317548	12.01091792	11.57154967	11.30236446	11.61341823	11.31902427	12.17420476	11.98410642
ILMN_1655380	7.438393329	7.295854484	7.37549312	7.575305808	9.052474286	7.370107824	7.32947021	7.456126444	7.46156335	7.44028253	7.399897913	7.387330984	7.420748288	7.550251245	7.4160129	7.449523571	7.399512978	7.393724759	7.396142635	7.351115572	7.395907697
ILMN_1655382	7.202320235	7.220933653	7.152876862	7.216465694	7.180787587	8.287659085	7.191616067	7.956499969	7.236446648	7.191838046	7.99152456	8.031789656	8.017093329	8.335447309	8.019220531	8.838582374	8.516926919	7.974814188	8.132786793	8.406689527	7.977492862
ILMN_1655387	13.38708119	13.82004809	13.60787773	13.41158506	13.90104291	12.26307424	13.64719916	10.76610231	11.48510935	11.85812333	11.28794583	11.85635623	12.20953664	11.89213516	11.13610916	11.84787499	11.00364797	11.73982783	10.43563969	11.40519023	10.91048744
ILMN_1655403	7.307537483	7.509581301	7.276005892	7.236143409	7.208348732	7.15059631	7.230369736	7.339318922	7.300864634	7.278268334	7.186578045	7.261929063	7.320289403	7.309100372	7.2940576	7.399728782	7.272776907	7.334575501	7.219855921	7.258256683	7.181656245
ILMN_1655404	7.230136543	7.291498105	7.351955926	7.323436693	7.212329883	7.34399202	7.20273019	7.296877329	7.273191466	7.409336125	7.353110372	7.3018328	7.411456702	7.33581031	7.428560597	7.402386443	7.35825297	7.328564903	7.362374601	7.177297889	7.308913241
ILMN_1655405	10.85013966	8.127268439	7.833064451	7.538125736	7.229207155	8.916614128	8.066441526	8.418498211	8.439339237	8.90696307	8.67242468	8.052834243	8.473984794	8.028523785	8.555222835	7.645713127	8.524142847	8.276702824	8.378600519	8.898332949	8.325929168
ILMN_1655408	7.327514661	7.30915211	7.342667826	7.256073013	7.226746067	7.332227307	7.199152618	7.21654729	7.336879453	7.174616671	7.307217889	7.310154999	7.25854809	7.357562297	7.236289944	7.301168971	7.292448483	7.237645362	7.323761436	7.236971061	7.3292519
ILMN_1655413	7.223514156	7.282532641	7.347443733	7.237032435	7.218904557	7.217097072	7.197310231	7.293379807	7.303458569	7.164336251	7.231054702	7.178620866	7.247986696	7.319096545	7.196147939	7.361428978	7.244104114	7.273049469	7.239933336	7.312523378	7.221070624
ILMN_1655414	7.496403603	7.22546054	7.314371073	7.421145564	7.22624076	7.52052851	7.184260927	8.043392491	7.453277798	8.936149912	8.528881035	8.364335832	8.501741121	8.129739719	8.922149415	8.089667495	8.127967051	8.279308697	8.249768613	7.898659344	8.188497011
ILMN_1655418	15.18457603	13.85777062	14.82341702	15.15768807	12.96080643	15.23759751	13.02614773	15.37563166	15.23223659	15.42994827	15.28531821	15.33455503	15.19215029	15.21735706	15.20795434	15.5261168	15.28095022	15.19772016	15.46334191	15.14715275	15.04020991
ILMN_1655421	7.280082295	7.380119359	7.323319466	7.313827983	7.214119294	7.368556893	7.213278942	7.359912934	7.319797594	7.462148074	7.318228882	7.311574269	7.355792879	7.269203081	7.297221173	7.361645825	7.353641829	7.369822186	7.359756862	7.314613993	7.400264162
ILMN_1655422	14.51609957	13.54549734	14.29515774	14.52455945	13.12333836	13.63279459	13.50468527	14.0650069	14.182957	14.16539334	14.21779594	14.15382317	14.08804856	14.46983925	14.22038089	14.07866236	14.0882748	14.2537693	14.45388171	14.02516864	13.76437969
ILMN_1655426	7.648559546	7.905011888	11.48750615	8.027590667	9.057019316	7.656029251	11.86250091	7.611200993	7.614421295	7.337648053	7.544378712	7.601330143	7.570847378	7.668688403	7.55615122	7.658192583	7.575419355	7.527092228	7.683010242	7.826937899	7.672902116
ILMN_1655428	7.325315063	7.294857765	7.336192885	7.520972145	7.240697781	7.380859598	7.194225282	7.332675008	7.332457919	7.334710326	7.241235116	7.256982401	7.361868085	7.365228827	7.342985986	7.34328666	7.39345974	7.40700998	7.448266628	7.421293713	7.429962655
ILMN_1655429	11.94104674	11.54879002	7.121994289	8.804666515	11.29493351	13.14374516	11.24555104	11.79361079	11.90664756	11.07119176	12.12789297	11.57495345	12.67052858	12.28968638	12.23762311	10.75716068	12.1505439	11.78610369	11.78187505	12.7158015	12.5445961
ILMN_1655433	12.38612791	12.53073718	12.33599085	12.96391698	7.477321964	12.32107253	7.677134376	11.1739074	12.04089434	11.71919139	11.63198661	11.98011496	11.93102742	11.86265267	11.89883208	11.72698351	11.91640934	12.21070126	11.35861689	12.29576507	11.98830427
ILMN_1655444	7.330701168	7.314117434	7.416113175	7.962503513	7.238472495	7.555047686	7.203452053	7.401390578	7.417841016	7.487877742	7.460016102	7.490555941	7.471933741	7.553077311	7.397997318	7.581421173	7.458730836	7.378735352	7.562121775	7.476579981	7.463692099
ILMN_1655446	7.209987822	7.254832153	7.267939536	7.247171031	7.20272309	7.59853826	7.204825168	7.569446318	7.792314378	7.261310225	7.292759921	7.197003668	7.383534104	7.686850063	7.276170268	7.253675692	7.24872228	7.375628236	7.611524682	7.456727847	7.821779583
ILMN_1655449	7.245497168	7.250745746	7.284242971	7.313266351	7.208728418	7.333124731	7.195093913	7.384315198	7.418070563	7.361091688	7.552991582	7.337638038	7.362599184	7.382990843	7.265097172	8.239961606	7.350003597	7.384333855	7.315307031	7.399308909	7.339716137
ILMN_1655454	7.49198216	7.284136123	7.349177979	7.255691737	7.180933843	7.292092401	7.212421853	7.250101215	7.368969923	7.339994403	7.277478675	7.321697425	7.287484271	7.248619164	7.264756765	7.197546754	7.342699292	7.313788517	7.198605828	7.278509141	7.255488598
ILMN_1655462	7.388087927	7.345477083	7.361222529	7.329986444	7.61454751	7.362166888	8.58414872	7.310738226	7.455614945	7.351114865	7.383564815	7.295020498	7.436840982	7.389152537	7.357452588	7.361107394	7.301946244	7.278635013	7.389076591	7.359053903	7.411375074
ILMN_1655468	7.304815336	7.283474252	7.309765277	7.246090775	7.23565282	7.321756889	7.206961079	7.376050461	7.349958816	7.321142583	7.3883354	8.165848167	8.114805531	7.335881374	7.391060708	7.287854968	7.367689257	7.290094471	7.377957303	7.286588529	7.319803313
ILMN_1655469	12.43606059	7.28988186	7.419034331	12.32789631	7.222022223	12.92488485	8.653805043	12.85453451	12.84639558	12.84360939	12.85230313	12.82652452	12.72223526	12.97346342	12.78257321	12.34690631	13.03187323	12.69208288	12.77131676	13.25988737	13.3928949
ILMN_1655474	7.298308443	7.287494072	7.275232467	11.70444544	7.383250057	7.253590079	7.578323136	7.284033298	7.191874925	7.332989996	7.287434955	7.245002531	7.207737457	7.351831493	7.241815494	7.271298877	8.039193576	7.247688524	7.251267185	7.29402068	7.259456373
ILMN_1655479	7.700203066	7.707117029	7.859839902	8.059076088	7.986796406	7.51336691	7.220895525	7.404337076	7.42720071	7.55828499	7.445656393	7.483353662	7.4499425	7.447808167	7.478213541	7.3044266	7.443667229	7.41709282	7.363428724	7.426495759	7.525576312
ILMN_1655482	7.880778496	7.270296329	7.327918265	7.435473563	7.222362123	7.536107343	7.209139121	7.542417449	7.795436056	7.293177557	7.543759498	7.332222442	7.663978817	7.457189618	7.605771118	7.242042185	7.62436104	7.71774062	8.17615867	7.550061301	7.526330422
ILMN_1655485	7.600348763	7.411967001	7.363794171	7.66610535	9.293411845	8.709045598	7.207261026	8.364181965	8.797092665	7.897216891	8.124801039	7.791304397	8.246564804	8.645089757	8.128543394	7.508852457	8.288131765	8.354265617	8.000209578	8.647897927	8.62611078
ILMN_1655489	7.252298415	7.287625598	7.216410031	7.239266645	7.226723539	7.354317906	7.20990848	7.219593358	7.274499259	7.332348891	7.372903619	7.28861901	7.240840474	7.306589492	7.27787657	7.230647594	7.287446353	7.381047579	7.24218792	7.294946797	7.234519716
ILMN_1655490	7.261179677	7.282066045	7.322612737	7.4216449	7.217496726	7.232088777	7.217755355	7.256759309	7.319176651	7.331193575	7.202120181	7.275463943	7.363210484	7.252444471	7.266996804	7.39428831	7.31902216	7.18413808	7.225352205	7.266789126	7.272908516
ILMN_1655497	11.85289382	7.260126501	12.68334494	12.66556399	12.89830556	14.04362619	12.67836544	14.15089423	14.31396461	13.87225608	14.14047877	14.39353974	14.44930659	14.36980154	14.24695341	14.10793874	14.48107469	14.40324899	14.51947294	14.18441146	14.32426456
ILMN_1655498	7.695605898	7.939164755	8.898453431	7.467140168	7.232274897	7.529224669	7.258540377	7.544541404	7.472687354	7.542027848	7.477710568	7.48782051	7.504283633	7.526107634	7.530359112	7.476875668	7.44484902	7.371677363	7.484554372	7.436203613	7.42175733
ILMN_1655504	7.341675211	7.295927345	7.215906181	7.335804322	7.205784502	7.663956904	7.202982707	7.594846463	7.716355809	7.537301061	7.611470893	7.441864126	7.722878093	7.63382363	7.592867359	7.79025651	7.725516832	7.675111041	7.708736971	7.871563273	7.848676709
ILMN_1655509	12.08941092	7.535956775	7.354923175	8.047700165	7.586259376	11.49313742	7.33935882	12.1460847	12.30689677	12.50323822	11.70003867	12.53560803	11.40185056	12.45226297	11.23698621	11.68473163	12.13131645	12.33393351	12.15224409	11.98778016	11.56243097
ILMN_1655510	7.216044592	7.259967383	7.238473126	7.227582397	7.232452775	7.272115866	7.201016179	7.219789856	7.230995856	7.175828105	7.227012014	7.325936002	7.211480481	7.170366742	7.219643225	7.230238363	7.192525727	7.169198179	7.289993087	7.207757272	7.266378304
ILMN_1655517	8.276274631	7.296256766	7.684501311	8.086299585	7.223456944	7.805540705	7.348168413	7.617092934	7.659937137	7.579786589	7.618883773	7.569565465	7.470663376	7.405535643	7.510668402	7.572705211	7.52299679	7.63009806	7.595843608	7.512780107	7.45502222
ILMN_1655519	7.287244921	7.386940092	7.441395238	7.249525014	7.218231926	7.310200895	7.211216543	7.214329912	7.284742866	7.365996012	7.258274196	7.409739758	7.2478056	7.374081656	7.322233204	7.273227273	7.49192713	7.292106254	7.22307097	7.409791907	7.365494377
ILMN_1655521	7.22898275	7.277226378	7.181815336	7.215933912	7.209702672	8.880986786	7.147542041	8.213109866	8.012355075	7.315137401	8.117458577	8.309377322	8.254468981	8.390751809	8.529257154	7.303156995	8.51807899	8.794599431	8.094733369	8.937997505	8.772303464
ILMN_1655525	12.9223837	13.55923572	12.50024008	13.29041812	13.33499852	11.70859935	13.38504175	12.34340309	12.42134386	12.67990278	12.23096329	12.07209942	12.38269518	12.59050673	12.23468924	12.31802147	12.43565733	12.2200943	12.13948721	12.07057336	11.88406652
ILMN_1655529	7.220767481	7.280150689	7.284741471	7.233134325	7.185319134	7.281021808	7.158030327	7.236538452	7.248029475	7.249568464	7.307006692	7.239302233	7.284619145	7.2371812	7.198181064	7.310783186	7.271196983	7.267323098	7.256906695	7.226786993	7.22894762
ILMN_1655532	13.63248572	13.67156451	13.24937685	13.67114096	13.64141068	11.03923069	13.69309618	12.20383543	11.54442153	12.56324155	12.07750393	11.98810362	11.85167295	11.29416128	11.80995702	12.22650914	11.75395275	12.09982902	12.47316102	11.47124167	11.02053616
ILMN_1655537	11.42335504	7.286291691	12.17393264	11.68227348	7.22330281	8.983733142	7.200363836	8.672438473	9.017352375	9.891340546	8.47377493	9.094620801	8.289348669	8.764805244	9.148454803	10.09263684	8.292176707	9.099418397	9.093403505	8.246464622	8.355980574
ILMN_1655545	10.75536333	7.284165889	7.345294326	7.628839736	9.118118706	10.32888766	12.95715605	9.984945409	9.93263024	8.477924658	9.065976447	9.509798285	9.287310299	9.344765706	8.026483339	7.328697727	9.204769218	10.15385873	9.516145577	10.11801597	9.723014997
ILMN_1655549	11.16095269	12.61166263	7.186180027	7.227771998	7.209947334	8.660492605	7.193517876	10.44761709	11.6319333	12.27885165	12.31755829	11.10964093	10.44517908	8.983060539	11.61877991	11.08158226	10.87888237	10.97110878	11.25624929	10.12790733	10.74347284
ILMN_1655551	7.73480587	7.252485774	7.392763377	7.316424019	7.253591285	7.349955288	7.20619455	7.360374124	7.324179647	7.292870308	7.310341621	7.34553295	7.404228829	7.374511197	7.328481063	7.486653838	7.335616746	7.294760304	7.332637956	7.335279181	7.37140777
ILMN_1655557	7.274652199	7.516021189	7.321621598	8.877172435	7.21690392	9.797116603	7.209444437	8.787789831	8.651050696	8.063734108	9.303577509	8.787180931	9.124385693	8.714617274	9.488884724	9.090357706	9.236613504	9.502082836	8.778764028	9.969616544	9.584194799
ILMN_1655561	12.3525398	7.218883614	12.28756134	11.73146133	7.1271728	12.8384848	7.199271215	13.11266069	12.94023272	13.30246357	13.15837465	13.19662282	12.94287898	12.950629	13.13503149	13.26953384	13.21023916	12.91090052	13.62825927	13.18038463	13.21880024
ILMN_1655563	11.15104357	11.64710397	7.833366754	11.66490734	10.46534544	10.95333097	9.729078517	10.54916422	10.63591193	10.25456231	10.60041892	10.2870755	10.73111692	10.93864848	10.53162098	10.53911331	10.56727062	10.97322813	10.7897365	10.39560073	9.868031564
ILMN_1655564	7.58415805	7.299572281	7.671675619	7.595373769	7.227364694	7.448894744	7.221138524	7.487929103	7.54509748	7.511912468	7.592519209	7.490861242	7.317796268	7.412318025	7.396545909	7.509565277	7.480781516	7.569527597	7.501113322	7.44685852	7.431011596
ILMN_1655565	7.256332434	7.278979892	7.2251752	7.27076255	7.203644931	11.32902169	7.196998374	10.68757658	8.084281568	7.436272828	9.8995596	10.10060859	9.42151071	9.87306018	11.00520377	7.263611274	8.731097108	8.617858074	7.105193979	11.1838584	9.998602675
ILMN_1655572	12.00683311	7.309993515	12.99251454	7.548544377	13.38675512	11.09826495	10.06116169	11.14953625	11.2645545	11.3289499	10.66349497	10.84637355	11.3516568	11.31148837	10.33698294	11.67939298	11.15417306	10.49778636	11.68029751	10.21542735	10.26232398
ILMN_1655577	11.63453792	7.285140842	7.708235078	7.352992675	12.62750153	12.37466756	7.20708725	11.43881541	11.52828967	11.44571602	12.56588263	10.26061572	12.84905737	12.11777173	12.16572596	11.73121546	11.52745904	11.48878962	10.18170758	12.33273793	12.6779862
ILMN_1655595	12.06815178	12.34725079	7.301638886	12.08234484	7.210923811	14.71728054	7.206163129	13.70963124	13.78479567	12.98203361	14.3575417	13.48118784	14.26035577	13.1365097	13.96259997	13.22372247	13.95246824	13.40573093	14.21822633	14.57418771	14.42094157
ILMN_1655605	9.12313048	11.47634528	11.27405205	9.28578048	11.60838323	7.623294394	11.8822729	7.792000554	7.65329872	7.709020102	7.612290526	7.738929188	7.613603568	7.682983851	7.605625655	7.591874542	7.707757214	7.713627822	7.579912615	7.605645473	7.630054164
ILMN_1655608	7.464726121	7.281038309	7.320956413	7.386716971	7.222304216	7.675974814	7.210895957	7.797797139	7.444544772	7.763599887	7.887975085	7.624896002	7.664926638	7.803646373	7.780454776	7.932710197	7.921042519	7.55230245	7.941123863	7.649183006	7.52799567
ILMN_1655610	10.21753312	7.292186696	11.9374014	10.7306392	7.238842697	8.280920488	7.816555688	9.770311352	9.741191937	9.700063269	9.199850334	10.23049643	9.177865317	9.536414859	9.80881539	10.14860671	9.853766293	9.132735583	9.334192839	9.118585368	8.576027822
ILMN_1655611	7.523772495	12.22462048	12.1636778	11.75541769	7.228749352	12.3796886	12.79269068	12.50479326	12.05208813	12.8668914	13.10544123	12.68383455	13.09419474	13.21630657	12.42869241	13.11141698	12.80100024	12.67597122	13.22571366	12.40054766	12.53588693
ILMN_1655612	11.93643616	7.257403869	13.0631791	12.19773873	7.212071675	12.40179627	7.195320141	12.1166627	12.5078833	12.91009007	13.1980378	12.12347279	12.77931575	11.88836454	12.56506027	12.80451403	12.15249841	11.85239039	12.28056051	11.71772773	12.73520586
ILMN_1655613	7.362567652	7.292802359	7.348858204	7.523661903	7.202161406	7.289863879	7.196393731	7.265770507	7.242184963	7.266756493	7.364875442	7.290017896	7.251010236	7.244081656	7.352585449	7.24223881	7.389754041	7.299162371	7.351663965	7.235853031	7.357104447
ILMN_1655614	11.58746795	7.384621021	7.977481711	12.12392078	7.208809735	12.86150528	7.362840506	12.47974245	12.73042542	12.3822524	12.71859244	12.62601508	12.50163278	12.33291707	12.85233931	12.45149018	12.91410182	12.90077539	12.79150669	13.083455	13.23909463
ILMN_1655615	7.377986614	7.295415092	7.35202584	7.308437456	7.196316662	7.437942964	7.234360974	7.434414892	7.441405368	7.367481219	7.327651937	7.46786884	7.279254584	7.475834979	7.347588899	7.480000343	7.390916901	7.428067116	7.369606759	7.439548901	7.404914933
ILMN_1655622	11.48518714	7.298655934	7.346926708	7.576264633	7.225169386	11.22531556	7.212125221	11.434279	10.68079383	11.39845679	11.36234643	10.29374723	11.45667207	10.55103841	11.20080063	10.05616487	11.57788225	10.64845482	11.39602243	11.49640166	11.55969324
ILMN_1655623	7.532244102	7.927798156	7.434709748	7.391100769	7.22614711	7.453728591	7.583382004	7.322016741	7.45649214	7.426899105	7.501433502	7.487687718	7.502780238	7.421685493	7.439700634	7.538420118	7.522813697	7.468109891	7.411934633	7.384237032	7.442357912
ILMN_1655624	7.22923271	7.263983191	7.3725352	7.46334565	7.217127284	7.376106564	7.207297383	7.297848527	7.358118018	7.349003959	7.335273162	7.433798777	7.42466086	7.468323231	7.48061527	7.451421634	7.378866918	7.355464056	7.480065106	7.412088344	7.377402703
ILMN_1655625	7.213648406	7.319437586	7.259458485	7.3102399	7.227744075	8.181536135	7.197463414	7.524995477	7.757827744	7.296550678	8.139196982	7.53515347	7.875453352	7.331999096	7.885386472	7.802635513	8.109079818	7.928465663	7.796373857	8.017047061	7.931307435
ILMN_1655626	10.20258204	7.384888069	10.79829056	10.85874608	7.251202492	8.734184425	8.746705169	8.968593864	9.300799843	9.488148872	9.007492787	9.141832115	8.69796376	9.067621889	8.990284871	8.927058604	8.911345842	8.970210325	9.020292813	8.938062214	8.849208444
ILMN_1655632	7.32010843	7.291673042	7.340930004	7.308320327	7.213190514	7.262479013	7.188787172	7.183909061	7.23836552	7.186241211	7.272835638	7.253271859	7.361420477	7.403523671	7.264828247	7.246753587	7.292056981	7.27978617	7.260766235	7.264192196	7.20240942
ILMN_1655635	11.06606394	11.67022823	7.265418045	11.09083577	7.225772578	10.64425441	7.200264409	10.70550062	10.86113021	10.42928521	10.36385221	9.833493863	10.84397144	10.17409132	10.09090795	10.05852403	10.20722396	10.4247786	10.72553468	10.62943693	10.49207718
ILMN_1655637	8.225934473	7.361364511	7.959492928	7.658181484	7.22580048	8.533237688	7.370563695	9.955005553	10.49986689	7.680361229	7.569584781	10.45314922	9.004866436	9.432653361	9.301709146	7.580750308	8.910723387	10.69341667	7.524049695	9.876907447	10.18824873
ILMN_1655642	7.22985417	7.135459938	7.262908944	7.216897423	7.217256921	8.203528151	7.174935906	9.1259131	8.333262109	7.128519589	9.15244155	7.810756675	9.034113834	8.649646809	8.864625057	7.28723831	7.793252989	7.855881515	8.273558561	8.333689223	8.120722815
ILMN_1655644	8.608489325	11.9816004	7.393862271	7.496166084	7.22706118	9.106185581	7.211092742	9.368291413	9.20387797	9.030879616	8.068761561	9.440301105	8.910034727	9.789130345	8.992338766	10.00017394	7.34991798	8.078562898	8.990175178	8.346289397	9.144847956
ILMN_1655645	11.29825322	7.236295298	7.25743596	7.224661233	7.226847121	10.80401463	7.193423409	12.54026133	12.54142819	12.32910623	11.91479926	12.30590573	11.75983522	11.96518852	12.48796393	12.23613748	12.29337324	12.75817723	12.33042299	12.25724809	11.7990261
ILMN_1655654	13.40801044	13.5164947	13.88874498	13.76393765	13.71413789	12.30502963	13.66387546	13.06366682	13.4110207	13.38472673	12.83889615	12.97449225	12.59382066	13.10564219	13.10027954	13.22420871	13.12277751	12.99078258	12.83581129	12.40333473	12.30446306
ILMN_1655659	7.355927104	7.7314384	7.341617212	7.716086334	9.043177832	7.446921764	8.178306626	7.339481482	7.393210932	7.437198095	7.362252312	7.414529531	7.390497765	7.472068326	7.465724904	7.56091298	7.473543527	7.397118114	7.367438484	7.336882541	7.409362004
ILMN_1655663	11.35342218	8.739686798	7.859911109	8.382512308	7.574766329	12.11623838	7.29856435	11.19919332	11.42261352	11.66362755	11.16238231	11.90620061	11.27205303	11.16035588	11.21018571	11.50882869	11.17286863	11.23240907	11.61464992	10.10847655	9.971302421
ILMN_1655664	7.251799802	7.234174196	7.229283266	7.234750834	7.222242243	8.606162638	7.523421121	7.241670532	7.226521459	7.209395726	9.873651439	8.834645196	8.94164474	7.469187604	8.587953476	7.158317804	7.29980182	8.354763601	9.80884521	8.413977947	8.616444081
ILMN_1655684	12.24915003	12.56581891	13.30447548	11.86945455	7.203368891	14.41210109	7.201079043	13.88068272	13.90299945	13.74563163	14.05637275	13.86650617	14.15627553	13.82499773	13.89365618	13.99787566	13.63546683	13.61950619	13.78766127	14.10735304	13.81964704
ILMN_1655690	7.225275123	7.23707138	7.271303428	7.282595922	7.20173561	7.337270399	7.197456211	7.340417339	7.515054601	7.73868956	7.348122774	7.399596018	7.529385035	7.749537151	7.265697251	7.260215878	7.239443943	7.444225723	7.294155689	7.46463296	7.363662574
ILMN_1655694	7.835244155	7.320162732	8.071988928	7.479725123	7.22643581	7.563655378	8.105614697	7.63850076	7.500380342	7.562438471	7.454329245	7.420100967	7.453357581	7.342010483	7.585352457	7.482857129	7.544516691	7.424969051	7.43391643	7.52088225	7.525176671
ILMN_1655701	7.240990307	7.219131485	7.246866748	7.250610402	7.207032755	7.276124534	7.172164814	7.312515818	7.246759253	7.307132411	7.200085641	7.355483907	7.244299846	7.241938018	7.266303337	7.301651259	7.288795259	7.266928839	7.333761033	7.248478528	7.320788163
ILMN_1655702	12.33753991	11.78903263	12.20814477	12.42886446	7.215370225	10.97899163	7.194828805	11.90937031	11.57297741	11.6259664	11.17187927	11.75294639	11.45956516	11.74277834	11.37704853	11.10632815	11.38830025	11.274675	11.80716892	11.65487873	10.82639456
ILMN_1655710	7.283611615	7.870138941	7.414297383	7.264780996	7.237075315	7.292095781	7.215527557	7.365571604	7.33488504	7.268840893	7.299874729	7.390827236	7.219774347	7.345168262	7.359976532	7.39541631	7.32600385	7.285891521	7.372137345	7.324151077	7.350495416
ILMN_1655711	7.230139048	7.28473935	7.166943623	7.215463868	7.192354663	7.304974223	7.189808751	7.301719656	7.209138183	7.324065853	7.23039555	7.208720652	7.194700854	7.193610862	7.221736599	7.264223887	7.324154746	7.266043481	7.235834547	7.212470084	7.259042555
ILMN_1655713	7.21563341	7.26331724	7.302954199	7.23796732	7.224430981	7.323142281	7.21398267	7.267365196	7.20915526	7.272123519	7.216477166	7.267133691	7.257275572	7.160115923	7.227195175	7.308661259	7.278493511	7.21370693	7.415175953	7.219579598	7.170229869
ILMN_1655715	7.679318888	7.294394938	7.373132502	7.36583036	7.220971851	7.386778683	7.514221564	7.306765783	7.339454685	7.354357212	7.254898767	7.384204819	7.329410407	7.368280722	7.418636968	7.290641835	7.339565392	7.349316867	7.303373104	7.332734475	7.34019968
ILMN_1655720	11.58969388	7.333857582	7.283248776	11.77941062	7.456600931	11.27681875	7.402430163	11.80587115	11.00980564	9.196821509	11.05008939	11.74255038	11.14786966	11.27739876	10.29505344	11.81964228	11.21498504	10.8504161	11.17873907	10.69222476	10.81437375
ILMN_1655722	7.304798491	7.288909447	7.236408891	7.227086295	7.203802357	7.587481908	7.21379298	7.249558584	8.808208433	10.06407461	8.036926989	7.212476059	9.026262115	9.621881575	7.34740986	9.718693481	7.288822595	7.23816209	7.202268187	7.75568562	7.218027978
ILMN_1655733	7.285734223	7.30466538	7.280631562	7.238192214	7.204051103	8.232919083	11.80534128	8.315288715	8.043622439	8.156047645	8.324273692	7.936619342	8.067581422	8.326335007	8.569230446	8.606154404	8.255522997	8.282206548	8.818857533	8.288498853	8.154520079
ILMN_1655734	7.248341653	7.254271986	7.157928755	7.492465797	7.194976304	8.225954205	7.189605935	7.954129245	7.734249174	7.669924413	7.920726892	7.811822315	7.828272212	8.012499442	8.20152233	8.138788252	8.198916945	8.051918603	8.076338514	8.160629815	8.413337546
ILMN_1655740	11.94087762	7.56280121	7.400375938	8.227073399	12.95325163	11.43483242	12.71858887	11.30844134	11.72423392	11.95251048	12.03829916	11.22798513	10.97217931	11.73568862	11.74129422	11.10079787	11.17536001	11.30539884	11.61747387	11.99817571	12.3327284
ILMN_1655748	7.223240149	7.25481777	7.317051113	7.242075312	7.191855547	12.19951512	7.20290139	10.74719284	11.14223329	10.09989279	10.71889025	11.18420265	11.23603866	11.22662187	11.42314636	11.58623612	11.45155492	11.38774041	10.91050269	11.87150408	11.35670254
ILMN_1655754	8.392584412	8.866759599	7.978713692	8.196748437	8.339526702	7.750416337	8.468748989	7.901525972	7.893082979	7.830410245	7.67197639	7.719603345	7.638279791	7.705700865	7.768757759	7.696016036	7.750351128	7.839545085	7.707125826	7.749488574	7.73741499
ILMN_1655755	7.947302047	7.63439341	7.340974871	7.34886314	9.419760041	7.413302491	9.195158507	7.41613878	7.452398919	7.478992998	7.315860705	7.275558612	7.538745823	7.441608766	7.413306708	7.468020285	7.420931272	7.437517233	7.448270235	7.437923333	7.415800389
ILMN_1655758	7.390011949	7.296826079	7.358241354	7.265583545	7.242183736	7.345317696	7.209332483	7.370746324	7.29140069	7.359946001	7.344756236	7.386555729	7.268855767	7.346491876	7.29441853	7.396268621	7.399616131	7.308437122	7.347658552	7.380188544	7.379400621
ILMN_1655765	12.09816742	7.24372648	7.189228424	12.08963515	11.85106207	13.1624448	12.73298733	13.2154098	13.2728296	13.24727859	13.40401913	13.49338049	13.30860718	13.67091134	13.59923319	13.31814334	13.74472781	13.64491171	13.7117485	13.46037974	13.50333733
ILMN_1655766	7.265117706	7.188887139	7.062931163	7.214034207	7.154810364	7.252619758	7.145503805	7.174798981	7.188509951	7.264973326	7.202141153	7.316861515	7.238245587	7.23255012	7.235679047	7.213496242	7.154556025	7.170517055	7.235995565	7.179133086	7.304873828
ILMN_1655771	7.636377491	7.833536774	7.797168176	7.654268691	10.81434465	7.517285692	8.472737295	7.560124753	7.569159302	7.474331241	7.562038603	7.580030556	7.500653716	7.564272616	7.562391611	7.550956803	7.53977261	7.471716423	7.525639266	7.44736598	7.553072473
ILMN_1655773	7.313830865	8.042322188	7.715091306	7.69659219	7.297367687	7.332394849	7.545899985	7.440986196	7.463620441	7.473319048	7.356460682	7.221762394	7.369257147	7.408769332	7.402803823	7.452271714	7.369831117	7.384942479	7.397783921	7.444031047	7.315278582
ILMN_1655780	7.809969885	7.586760173	7.649385939	7.652011288	9.393410921	7.948120183	9.318141908	8.199825322	8.212198201	8.279273537	7.87155229	7.919755921	7.866400722	9.085032886	8.515296917	9.067078412	8.49643817	8.606350563	8.802607426	8.559513765	8.460337985
ILMN_1655783	7.294174968	7.296231225	7.264438822	7.237907258	7.210024126	7.338979715	7.205228424	7.381175714	7.306286668	7.224404445	7.238011521	7.359302646	7.398952424	7.238801561	7.303906463	7.243615878	7.228655824	7.255797371	7.352565612	7.353844261	7.354669711
ILMN_1655788	7.227072521	7.257687561	7.219425278	11.36794972	7.182006936	8.928975957	7.242247628	9.966515491	10.32983884	8.910282787	9.925219131	9.891162816	10.00587191	9.89903451	10.05146424	9.744921192	10.09918481	11.27821166	10.50288025	10.48692768	10.20332445
ILMN_1655789	7.279627134	7.264849528	7.345153107	7.494998789	7.234137309	7.387419112	7.21097197	7.37191341	7.311595299	7.300421595	7.337439993	7.321422106	7.294659667	7.365004895	7.27671157	7.33220082	7.344071386	7.297845904	7.20562717	7.321047605	7.287868959
ILMN_1655796	7.54326176	7.295836244	7.351922981	7.470010334	7.224398267	8.166321359	7.213124605	8.782743211	8.225617707	8.814890606	9.26147877	9.048030531	7.851547997	8.708973715	8.501083887	8.93583689	8.771712914	9.084863808	9.425207443	8.258293491	8.579841017
ILMN_1655809	10.78079955	7.332115746	7.404100929	7.506861168	8.367396874	9.495433656	7.648190473	10.48148468	9.954654425	10.46003491	9.953680406	10.95393527	9.863464198	9.821300483	10.14348447	10.28543905	10.05071253	9.63257016	10.22584384	9.026330815	8.907306505
ILMN_1655819	7.234558859	7.293050797	7.327296748	7.250879465	7.22315547	7.398554435	7.211395764	7.302345646	7.199770754	7.163737692	7.295792641	7.278387738	7.388303058	7.19595878	7.255397003	7.231556895	7.351925764	7.269231912	7.250836902	7.374103736	7.247584263
ILMN_1655821	11.86125337	12.17180237	12.49532374	11.89034152	12.9213931	9.024761058	12.82563457	9.587272917	9.795835758	10.62967594	9.655757406	10.45542875	9.111451885	10.11723075	9.012040601	10.48251964	9.331055525	9.331093584	9.668406006	8.986367982	8.818280583
ILMN_1655827	7.228656061	7.246559195	7.313713626	7.292260358	7.212364229	8.893112458	7.199197193	9.746442749	9.749739696	8.998491417	9.480367824	9.194991825	9.17035204	9.911038114	9.933844828	9.659486568	10.15648211	9.72040762	9.807894288	9.824623446	9.791477522
ILMN_1655842	8.07845698	7.366351001	7.379969539	7.709739716	10.7959757	7.652527362	10.00134483	7.657334602	7.670141208	7.775997908	7.588281738	7.631136228	7.614170935	7.584760457	7.620575273	7.640510526	7.660669197	7.5893348	7.630075864	7.598186355	7.611212973
ILMN_1655844	7.327582746	7.30577598	7.406626816	7.321564623	7.222933797	8.578983571	12.50824538	9.343005802	8.650064301	9.222558584	9.410383891	8.185767402	9.53992778	9.671332153	8.782531773	9.843313121	9.336316767	9.482358004	9.806659147	9.973404991	9.805133751
ILMN_1655849	7.743160288	7.36598071	7.426895388	7.396929693	8.688133544	7.450065884	7.360554821	7.582722983	7.507218227	7.449012689	7.472078765	7.522777329	7.448670842	7.650230275	7.499519524	7.418554445	7.527444412	7.512232554	7.400361032	7.510179497	7.500280952
ILMN_1655860	7.502569695	7.306450697	7.35770542	7.345689363	7.244670077	7.516757292	7.213931789	7.455293861	7.4665016	7.566186913	7.350543853	7.494129623	7.444797666	7.358194685	7.427047238	7.407107357	7.455479717	7.482308949	7.344598373	7.42644559	7.430757364
ILMN_1655863	7.801770503	7.81945808	7.350927903	7.39812463	9.727136135	7.419341209	8.49216614	7.569743271	7.469000055	7.485009326	7.509717306	7.518695099	7.593650159	7.427757866	7.580872759	7.492602634	7.48170583	7.551796283	7.456645469	7.615267531	7.549780114
ILMN_1655864	7.268957768	7.281310423	7.313880351	7.263781455	7.226642567	7.431752162	7.375133368	7.565959507	7.551536974	7.520118067	7.408985972	7.46847602	7.395433695	7.526884377	7.437192923	7.383470115	7.440977197	7.462486843	7.481111288	7.491331895	7.436807888
ILMN_1655867	7.220063642	7.291999821	7.325948496	7.265747655	7.542057993	8.215353873	7.201073532	9.784948605	7.382909431	7.352728814	8.892081347	7.369768999	7.906804112	9.014768161	9.286597595	7.378913318	8.751295028	8.113519737	8.622735602	7.980004507	8.132901217
ILMN_1655868	7.330994647	7.306485335	7.355784509	7.319716473	7.213675723	7.457841882	7.211129463	7.382219623	7.449984782	7.473536831	7.422655403	7.455961414	7.449363858	7.483282751	7.486066987	7.500885569	7.502285301	7.487843309	7.470445916	7.520218832	7.52077286
ILMN_1655871	7.465306261	7.696788201	7.356264558	7.776474473	7.888522829	7.44525025	10.65021352	7.540352504	7.466707202	7.608018182	7.486385001	7.522563263	7.438702315	7.434068314	7.504080843	7.521608915	7.481135717	7.470746993	7.430618192	7.450695915	7.430198988
ILMN_1655876	7.713703346	7.364372848	7.416565669	7.489081081	7.222111419	12.15987527	7.251301212	11.08829993	10.14555308	11.7203588	11.01224434	10.46370651	11.17251161	10.19478659	11.20950471	11.52889752	10.96600937	11.69566853	11.3443048	10.82768898	10.95298974
ILMN_1655880	7.687970685	7.350861752	7.383274224	7.49245439	7.231575096	7.433612507	9.499116984	7.385953672	7.485460807	7.447385947	7.521600334	7.424547243	7.505282024	7.428411608	7.414899419	7.503656561	7.49267107	7.461406165	7.633199562	7.516913391	7.430378961
ILMN_1655884	14.38254265	12.99091683	13.51537229	13.87063553	13.60830045	13.72394398	13.60924626	14.57462999	13.39036817	13.57455295	13.38716287	13.61957781	13.64788552	13.95219068	13.6725203	13.42704661	13.49989972	13.58477848	13.64346325	13.52441889	13.89711731
ILMN_1655892	10.8975338	12.14121402	12.7152513	11.97659319	13.24890647	9.755181969	7.209102298	9.4606798	10.00776188	7.397848379	9.429998945	10.63060059	9.996453246	8.653119623	8.938853022	7.318578084	9.138933966	9.290480258	10.04065425	9.107619943	9.446442542
ILMN_1655893	7.34079168	11.74293017	7.352427541	7.221824982	7.252058116	7.522770478	7.208492108	7.289112093	7.702976317	7.353374421	7.576927215	7.401424827	7.260129505	7.26744605	7.242657118	7.249807742	7.405025263	7.288100492	7.425713433	7.59703429	7.351359683
ILMN_1655894	7.494736876	7.923464896	7.623894357	7.468113704	7.287362963	7.29637541	7.798711545	8.574566867	7.362071705	7.387174925	7.355870977	7.404978524	7.387441267	7.241232711	7.350083637	7.48424639	7.297164646	7.362359835	7.394130186	7.183679592	7.338495023
ILMN_1655904	7.55317573	7.374291232	7.739575574	7.304103255	12.14092031	8.648301509	7.217215097	9.414774943	8.81896904	8.327233814	8.609621132	8.742288445	8.570703801	9.576875397	8.75585661	9.519429137	9.056605383	8.932182803	8.930322881	9.096613171	9.228735684
ILMN_1655905	7.295876158	7.686858652	7.41752768	7.306663714	7.235501974	7.34076748	7.212136346	7.336093638	7.436110477	7.374256785	7.34387793	7.371602566	7.348134532	7.288114844	7.319701812	7.320226864	7.300809972	7.38273873	7.403502191	7.363128518	7.322726771
ILMN_1655906	11.61054505	11.80034739	12.0750348	11.94167029	8.506206342	10.30652092	11.09323544	11.95704979	11.63803119	11.75029245	11.41706053	11.61653669	11.37333525	11.59648421	11.62798894	11.47710505	11.0775868	11.37365203	11.13931035	10.60796895	10.78984915
ILMN_1655909	7.280760074	7.2476049	7.285926154	7.297476328	7.226248317	7.322463682	7.211512505	7.348009211	7.329939324	7.284021829	7.268432128	7.331062437	7.373995855	7.281463236	7.368365476	7.372481186	7.348778469	7.304977321	7.318032205	7.330486598	7.369725821
ILMN_1655913	7.785425774	8.158064507	7.768347868	7.43222594	10.19016493	11.55609047	8.87568195	12.45892706	12.76118689	12.49757496	12.75694112	12.51018	12.34021327	12.77238882	12.66097525	12.41804893	12.71821422	12.47374049	12.55874046	12.54855764	12.9942333
ILMN_1655915	7.414342162	7.257487434	7.339658771	7.422490404	7.246926178	10.07477815	7.192700326	9.136583224	10.88247252	10.91887052	11.00460455	9.545564136	11.3852148	10.66727905	10.2198605	9.987250577	11.02388899	11.04081752	11.38816031	10.72130763	9.795565081
ILMN_1655921	11.81097978	7.289936455	7.309765416	11.73286135	7.217620151	11.52205654	7.390019786	11.4270545	11.29024479	11.39661143	11.43177886	11.63225534	11.2367396	11.31664007	11.49135928	11.26476926	11.31562513	11.20836038	11.30203722	11.16862322	11.23737946
ILMN_1655922	7.234273354	7.278667731	7.347956784	7.250368903	7.701133693	7.384490928	7.213956058	7.418554758	7.490563497	7.403903916	7.37458672	7.367739691	7.397824542	7.414672971	7.346298713	7.327486621	7.393311795	7.436624594	7.446837955	7.381402154	7.408714497
ILMN_1655924	7.212385606	7.279469457	7.313903064	7.232825146	7.210179011	9.541650619	7.206455949	9.854132418	10.33673904	8.325601935	9.827696417	9.734657082	10.18646009	10.20776464	9.788594214	9.810546798	9.579149018	10.06115639	10.43933982	10.50091934	10.36015158
ILMN_1655930	11.5576809	7.271803501	12.04401857	7.25119173	7.207358836	11.68672213	7.200555063	10.74181499	11.41975863	11.01231994	11.58479197	10.27037107	10.74151558	10.62368495	11.42134008	10.3926406	10.51151516	10.92013844	11.12481942	11.20316501	11.95140509
ILMN_1655932	7.217080119	7.217753997	7.249982021	7.279321262	7.1990817	7.256684518	7.210513382	7.29187478	7.267913881	7.268804354	7.274759131	7.39151992	7.142552667	7.263415413	7.358020299	7.305809145	7.307105248	7.23554239	7.289265583	7.310588928	7.233344323
ILMN_1655935	7.845868547	9.58042641	9.6868561	8.309382647	7.390921915	8.088443746	10.03394765	8.871840071	9.606158163	9.76914391	10.07909966	9.720178556	9.38691652	9.163577212	9.508750311	9.190415378	9.032199091	8.97054912	9.146094383	8.903580626	9.10314448
ILMN_1655938	8.133271546	7.281463278	7.295206136	8.065966738	7.281279735	7.758186213	7.15492011	7.645824065	7.636284639	7.762860751	7.625442687	7.584871294	7.710831655	7.638878155	7.709420687	7.604735728	7.628772501	7.607887368	7.647796039	7.644651549	7.71446087
ILMN_1655940	7.214015294	7.219689621	7.231589812	7.248000108	7.183743571	7.264146013	7.328275594	7.216490817	7.268084032	7.27157553	7.225624164	7.221292189	7.256991459	7.322863991	7.221886219	7.225687757	7.248268827	7.205573999	7.229631364	7.256596118	7.186014003
ILMN_1655941	7.206655343	7.174011728	7.322193941	7.426913859	7.226168897	7.223170533	7.207737648	7.282615854	7.350347984	7.263971857	7.236466869	7.286677351	7.348372275	7.306983204	7.23861188	7.192982685	7.300895615	7.212528206	7.139506524	7.286575107	7.239236328
ILMN_1655949	7.20297822	7.263814145	7.264345327	7.279716927	7.224404676	7.401955467	7.207260171	7.728303211	7.698714345	7.562480188	7.496989026	7.638531283	7.624214516	7.530798556	7.522970246	7.613085094	7.560187234	7.579670666	7.631271975	7.499034547	7.580220824
ILMN_1655950	13.44543786	14.27013139	13.81827405	13.82005809	14.3284632	10.95453915	14.35222603	12.12423981	12.2337123	12.7778775	12.00158821	12.34470739	11.82550075	11.91157026	11.25066639	11.03945378	10.9094214	11.63445603	11.29052518	10.6298277	10.79863227
ILMN_1655952	8.174134196	10.28210406	8.998693777	8.693910263	11.21154238	7.647208425	10.49370502	7.708491046	7.635571627	7.626382115	7.532775243	7.585875793	7.411390648	7.606217258	7.623080947	7.626094238	7.663654993	7.531772776	7.508052714	7.569057334	7.598569466
ILMN_1655955	11.0890525	7.294922311	7.089562181	7.229458751	7.21910941	10.65351754	7.183001907	10.13864379	8.670976902	9.563584565	10.37236989	9.52142026	11.12159287	10.21514368	9.836641127	9.018942159	9.937608445	7.973791564	9.930669733	10.6797687	10.01905821
ILMN_1655961	13.9203918	14.02640935	13.73132225	14.16614186	8.851815855	13.59052956	13.94065342	13.80598671	13.93585704	13.87615732	13.80853208	13.72287013	13.96414971	13.95068739	13.88566039	13.79073531	13.34635783	13.79142931	13.93466434	13.67525117	13.69882479
ILMN_1655974	7.822580629	7.911856762	7.642697941	7.924393894	7.22674811	10.07082497	9.299581457	7.691971766	9.363310067	10.00477164	9.560669517	10.30012098	9.464006784	9.28045935	9.974269013	7.659137764	9.71131375	8.713321828	9.573976434	9.244894789	9.408784441
ILMN_1655980	7.578436095	7.295315527	9.79013179	7.871846816	7.349702551	7.538687208	7.229660486	7.908221879	7.957344997	7.981513502	7.648552438	8.109390112	7.66885714	7.749232021	7.686859001	7.763490415	7.69084253	7.711385321	7.588146968	7.668580614	7.695860749
ILMN_1655983	11.13342093	7.266828135	7.152231185	7.50325294	7.205604674	11.19794984	7.168769874	12.94648664	12.90274046	11.47205813	12.80074492	12.72245202	12.3450275	12.83793634	12.17327271	10.06389655	12.15104092	12.94240309	12.25825932	12.23422875	12.43443536
ILMN_1655985	7.281100814	7.28377495	7.337549549	7.372975305	7.238461898	7.365311243	7.209957455	7.359180507	7.343791413	7.418691586	7.422485829	7.39550296	7.40746936	7.297337173	7.418289832	7.492050867	7.359754637	7.395281597	7.436730717	7.371087881	7.417913458
ILMN_1655987	12.72450536	12.42591793	12.72744579	12.40799917	7.221186703	12.61250942	7.212882336	13.12680419	12.08136369	13.4669873	13.51567227	12.41162842	12.34661902	11.86159827	13.01887648	12.75575419	12.98219279	12.58462069	13.21030317	12.23911676	12.01049379
ILMN_1655990	11.69390493	7.277911139	7.270772058	11.88932394	7.204891818	12.99989516	7.160558915	12.34074608	12.18915384	12.44532296	12.91011378	11.90333295	12.59424897	12.48340849	12.8783217	12.35092058	13.05974338	12.73204357	12.6753392	13.41511004	12.89001812
ILMN_1656011	8.031935684	7.32151277	7.722610836	8.126097306	7.236377955	9.953384612	7.199081748	7.74542708	8.058263125	8.349433332	8.199399465	8.278522219	7.920448144	8.079512854	7.954766036	8.150769565	7.625117016	7.932653833	8.344047455	7.831921502	8.798771344
ILMN_1656015	7.483216538	7.180392526	7.140554935	7.239923029	7.206724936	7.165425688	7.196713561	7.277069896	7.270632016	7.260573911	7.195729028	7.239748849	7.307376601	7.266533268	7.260701726	7.252691436	7.261980952	7.332044695	7.127119677	7.130693487	7.160762215
ILMN_1656016	12.48055358	12.85113425	11.46668532	12.68418293	12.20992653	11.81687426	12.23036786	10.09904741	10.06036099	10.73602316	10.67394423	9.573868822	10.90290889	10.8638319	10.46782871	9.877875656	10.94337634	10.69964334	10.11522571	10.6341327	11.02819992
ILMN_1656017	11.7133625	12.17806493	12.0152509	11.88569854	7.199438391	10.79185234	7.206954875	11.49501934	11.45966427	11.52994555	11.2146198	11.71354259	10.96178745	11.56870966	10.79765172	11.5889102	10.45106408	10.99096168	11.30735004	9.977763326	10.05717737
ILMN_1656019	9.52427298	9.393352497	10.8432743	10.20257252	7.361829866	8.028957502	7.864242109	8.003568304	7.943342848	8.032908815	7.88546063	7.946897257	7.98947377	7.92268142	7.957861987	8.011554312	8.081553708	7.989079908	7.805921731	7.847764714	7.921274781
ILMN_1656021	7.249887075	7.278220674	7.350831941	7.241702814	7.223223828	7.308532404	7.212418945	7.350508833	7.456467055	7.391669479	7.286744812	7.251567295	7.310177187	7.304240752	7.347781803	7.366768056	7.40939154	7.463915998	7.268660653	7.318561962	7.343261614
ILMN_1656024	7.301891897	7.671762062	7.324060936	7.546150451	8.465668509	7.33677001	7.264858926	7.314984436	7.353038432	7.376335664	7.343452034	7.445707568	7.226857971	7.319314961	7.321365544	7.276216193	7.351461296	7.350996031	7.329921446	7.339149766	7.273322843
ILMN_1656033	7.44871218	7.294069713	7.50536174	7.471934702	7.231687511	7.398840363	7.230664194	7.478998221	7.457539379	7.463962302	7.397092427	7.458339045	7.478160634	7.471823615	7.429557804	7.339518176	7.43513505	7.385670377	7.402378669	7.356272135	7.380334189
ILMN_1656040	9.8111641	11.33297856	11.73623392	10.06249921	7.274893704	8.144601822	9.425485633	8.42516728	8.627081565	8.841947821	8.132088281	8.006796049	8.438021347	8.052456066	8.245153668	8.05914785	8.106164488	8.029140955	8.035111697	8.037120549	8.006720636
ILMN_1656042	13.19420095	12.85411954	12.87482655	13.52879352	7.22305605	13.36389401	7.179090859	13.97116856	14.03665349	14.05592576	13.89599415	14.34107438	13.9284484	13.79790213	13.98332457	13.88782519	13.67395393	13.94831347	13.44923498	13.60369637	13.56043719
ILMN_1656045	10.88390033	10.01420219	10.03707881	8.393660026	10.51443904	13.03687958	10.72839359	10.22798022	10.95985433	8.868087028	11.07606386	10.74286101	11.34304564	11.03036941	10.89371546	8.637592427	11.1426006	11.76036763	10.37313727	12.13227198	11.79320784
ILMN_1656051	7.339902596	7.325978809	7.262425552	7.261017453	7.213695724	7.267140381	7.208396726	7.303719844	7.293791873	7.331199623	7.332869291	7.253923842	7.224071193	7.211125964	7.344793893	7.314925232	7.301162336	7.242357039	7.308542278	7.21536695	7.301075657
ILMN_1656052	7.262129667	7.294844771	7.345862665	7.321350806	7.218967117	7.397499584	7.191456259	7.23380494	7.314477571	7.369386358	7.355408682	7.341700007	7.305980103	7.444234398	7.327785745	7.332602913	7.31009399	7.308259744	7.253447736	7.344781557	7.24492017
ILMN_1656057	13.87275945	13.56012462	14.14630841	13.87007654	7.478368218	13.5404299	7.274151664	13.03375705	12.59886254	12.92664936	13.00775185	12.63805444	13.46999597	12.64980965	12.64679601	13.99757015	12.70305381	12.91523292	13.28088393	13.28987052	11.41577734
ILMN_1656066	13.71941935	12.82983221	12.81182948	13.45146292	12.02444301	13.24441287	12.86087245	13.14826264	13.04316064	12.63997042	12.83034218	12.70512573	13.44770643	12.77773134	13.37979543	13.21150258	13.28076628	13.45055481	13.1258715	13.60735357	13.36485533
ILMN_1656069	11.82721607	12.6386138	12.75354925	12.14773776	7.226397143	10.21417368	12.91831983	10.60559269	11.08542995	11.62480512	10.21742429	10.95534303	9.720109881	11.33461876	10.83830683	9.811920952	10.22071258	11.17341287	9.206989093	10.60173799	10.00117489
ILMN_1656073	7.22062187	7.260277227	7.272105841	7.214307397	7.229047742	7.33483039	7.192633813	7.247895405	7.246843708	7.182392438	7.208101067	7.165115551	7.249726442	7.207051592	7.242299583	7.299176849	7.138484325	7.230947178	7.21165556	7.199081541	7.279759706
ILMN_1656074	7.265970503	7.300843347	7.345833649	7.229037097	7.225423096	7.282479337	7.211513196	7.388378488	7.332703477	7.297457588	7.391382585	7.329086796	7.256085096	7.240202123	7.312374017	7.340465188	7.320506328	7.256145952	7.226859897	7.289683122	7.346936727
ILMN_1656079	13.98896512	14.50462623	14.37851504	13.94168879	14.37918407	11.77859531	14.10374266	11.70573357	11.75504235	12.94424219	11.90139574	11.52222832	11.84365505	11.76179938	11.38974017	10.21946525	10.62612881	11.65150997	11.11265453	11.46401579	10.71527007
ILMN_1656082	7.93700201	8.195689603	9.401440703	8.016905933	8.905652346	7.77622286	10.45897647	7.620797259	7.618822082	7.546500799	7.537030811	7.615136038	7.556789349	7.767901272	7.453891363	7.580522974	7.487067733	7.559642424	7.657793056	7.57001093	7.558588726
ILMN_1656084	7.264742588	7.243975858	7.230887439	7.322035542	7.201896405	7.341050728	7.21932184	7.320250724	7.263274601	7.303931352	7.432549026	7.360256639	7.321515363	7.31040667	7.199444403	7.351494398	7.29375343	7.33462167	7.378643304	7.255370829	7.376505105
ILMN_1656088	11.60592627	12.51242374	7.191299528	11.76966771	7.175409867	9.058082631	7.175696269	10.72556466	11.40559028	11.23543122	10.67427385	11.64192836	9.878075339	10.40674846	10.58009044	10.14512042	10.99258484	10.61957563	8.675644875	8.458643325	10.5534723
ILMN_1656097	7.337055729	7.297241844	7.333549921	7.283026265	7.226018427	7.696934977	7.197618395	7.263475588	9.524028965	7.326354065	7.271983517	7.995698095	7.336027425	7.90036533	7.283119469	7.376190228	7.27943703	7.33960874	8.367630336	7.566946945	7.542353975
ILMN_1656110	7.331722823	7.311920655	7.350695281	7.443953465	7.620766371	7.423390979	7.20793579	7.409945357	7.440392603	7.40006265	7.345658827	7.458947825	7.32063805	7.473538956	7.399467196	7.514479325	7.445869632	7.428082936	7.401711521	7.409568059	7.415040329
ILMN_1656111	12.42259229	11.83847767	12.84809707	12.35130377	7.186056554	12.70552076	7.208382057	13.32348163	12.93391186	12.17195984	13.09516332	12.88760253	13.03289866	12.82499989	12.67238244	12.83154058	13.10269136	13.21379463	12.34762813	13.27800785	12.61861671
ILMN_1656118	12.25945014	7.429699409	11.98673718	11.82362174	8.638741373	11.45753449	7.212119095	11.1398281	11.18692321	11.52816251	11.0290464	11.09880917	11.02352085	10.13146742	11.92883893	11.9143115	11.19288708	11.23364843	10.55760386	11.30330873	11.05271933
ILMN_1656123	7.259742535	7.536345566	7.201569045	7.249588334	7.22514986	7.341473013	7.171687518	7.362828282	7.402135811	7.391227178	7.334279548	7.25671467	7.324465386	7.423983824	7.336248003	7.316074923	7.275064969	7.286092118	7.292045938	7.276363727	7.377670273
ILMN_1656129	7.200809413	7.217436747	7.147697093	7.218606129	7.193461912	7.212314218	7.168738737	7.18226544	7.30340218	7.281533094	7.197342411	7.21617732	7.120740608	7.19544455	7.181713816	7.22070459	7.193770901	7.245704727	7.111697777	7.16940218	7.148736277
ILMN_1656131	9.98561975	11.49581954	11.08529362	8.939921055	9.647669841	7.796225333	11.84000382	8.043160664	7.995517911	7.982031835	7.736315633	7.754899861	7.708557307	7.741603532	7.869206625	7.823001602	7.823865577	7.84670885	7.854485776	7.821615366	7.878423301
ILMN_1656132	7.213706143	7.230008642	7.253556409	7.214507114	7.168000581	8.023589441	7.194610091	7.230990577	7.232669829	7.189502879	7.894065049	8.363448675	7.165030259	7.228776644	7.142216249	7.21688795	7.276210326	9.004748934	7.137396532	9.177127089	7.553822893
ILMN_1656134	11.77248747	7.296297352	7.327268262	7.409712239	7.220637701	12.93711251	7.202491611	13.76199309	13.57058701	13.49526573	13.46668973	13.58769238	13.48497717	13.72531998	13.34221801	13.52336467	13.51209583	13.53805377	13.47011027	13.41301658	13.25519486
ILMN_1656136	10.83828702	7.236052975	12.26895239	11.85479713	7.213240368	11.85814836	7.163747433	11.31656927	11.75799119	11.19555294	11.69270954	11.3255274	11.63076402	12.14390443	11.83019976	11.44759497	12.02595657	11.77905557	11.01592496	12.40842895	12.28777657
ILMN_1656137	7.948791152	10.56686993	9.058043542	7.797161408	11.4213549	7.573417869	11.29301965	7.494816103	7.564723757	7.508761452	7.584854077	7.546597461	7.58926758	7.547907203	7.647861632	7.553050482	7.596354364	7.524172242	7.55627971	7.519141756	7.520101699
ILMN_1656139	9.105028812	11.34114869	10.63556621	9.505498314	11.19447775	7.639613335	11.76451456	8.036933895	7.920137487	8.146151426	7.59500602	7.771213374	7.642049342	7.943483069	7.732477922	7.61249046	7.86887461	7.960184045	7.501701673	7.767783359	7.718366754
ILMN_1656144	13.53757908	12.32957742	13.03350537	13.07920067	7.201272506	12.70987051	7.15737086	12.14391245	11.98492886	12.87510821	11.94687939	12.13239823	12.42083248	12.47511723	12.71806153	12.47201047	12.51614259	12.04820581	11.59591381	12.36769822	12.18374239
ILMN_1656145	13.46823995	13.26332925	13.20221993	13.28095961	13.30824851	14.03369251	13.40688516	13.89613191	13.75000989	13.29332139	13.23714276	13.52724232	13.54479995	13.50916428	13.54636118	13.47841604	13.64780639	13.73157428	13.40393532	14.18221001	13.86849075
ILMN_1656149	8.554111105	8.643853088	8.235347036	8.347505937	7.818784672	7.648228973	7.457795262	7.845085817	7.817027896	7.652476089	7.726463463	7.73572287	7.620115117	7.824935137	7.906700412	7.72073028	7.80295669	7.736194686	7.785493122	7.819780074	7.741243042
ILMN_1656159	7.297359367	7.287886775	7.277754094	7.22584683	7.199580886	9.58029861	7.198843925	11.01499835	11.16426522	11.16729205	11.2064358	10.42472169	10.80317655	10.61365129	11.64055839	10.48197671	11.26204974	11.27104072	11.098841	11.39649665	11.76820987
ILMN_1656165	10.81480546	7.528193909	7.414723121	7.92612875	7.32697495	10.54379449	7.330780856	11.05789122	10.87466208	11.41785804	11.22994211	10.91096825	11.01581919	10.65842331	10.72840571	10.82610049	10.88290761	11.12816731	10.93881615	10.78405112	10.87447916
ILMN_1656169	7.641906159	8.245179363	7.494325261	7.322293739	11.13566012	7.432026925	9.202432086	7.438234205	7.482176724	7.481814625	7.501385661	7.47806941	7.465430468	7.519051938	7.415249789	7.464718365	7.453776653	7.351804399	7.412079828	7.382325894	7.486952402
ILMN_1656170	7.578548216	7.617586946	7.346052725	7.431644262	7.188577813	7.522610292	7.20461487	7.427119252	7.511124112	7.591479406	7.40737894	7.471751305	7.466066513	7.558355368	7.52687825	7.419350977	7.482768679	7.591936767	7.423471185	7.489145936	7.477328477
ILMN_1656171	7.242579122	7.205834031	7.163368012	7.240083605	7.211420508	7.34645693	7.18872003	7.332034287	7.319740975	7.190583598	7.091776731	7.342039786	7.271243802	7.329940093	7.277495785	7.294403604	7.21327471	7.339522447	7.257655956	7.224441076	7.299332315
ILMN_1656176	8.069171434	9.545625987	8.054508217	7.722549062	7.280093376	7.669565301	7.929199901	7.694328163	7.637449272	7.731946746	7.60786162	7.584868786	7.579840155	7.60401259	7.555633852	7.564015812	7.549695794	7.691539703	7.495346107	7.60188977	7.552568471
ILMN_1656181	7.249104944	7.286235782	7.359454255	7.26692744	7.564327695	7.402426173	7.213525036	7.318406681	7.343083559	7.372726444	7.329349408	7.259704993	7.308097475	7.393323581	7.360351463	7.238343487	7.304094662	7.29540636	7.289731019	7.390040919	7.299455723
ILMN_1656182	7.257785741	7.239965713	7.304651965	7.321509638	7.218365266	7.29860188	7.208628229	7.258467676	7.392840254	7.238708418	7.308817242	7.368440483	7.451660133	7.335494777	7.336924449	7.254016608	7.341895986	7.30446052	7.321703144	7.304566952	7.313195306
ILMN_1656184	8.37096234	11.41539111	10.54389308	9.120272447	11.60310523	7.481556517	11.85814103	7.66096966	7.581633653	7.742983109	7.582135627	7.54840853	7.583346218	7.523810899	7.598965325	7.573078189	7.590791964	7.529371666	7.718221526	7.441529656	7.453962771
ILMN_1656185	8.310344069	9.044998217	8.771014064	11.74077166	10.34827813	11.57937009	9.860032007	7.805610768	9.739043696	9.411070683	10.16309588	9.840069357	10.00550352	10.16284717	8.998499811	9.865951468	9.515701397	9.107552681	10.15440703	9.771615283	10.67738395
ILMN_1656186	11.73126705	12.42311763	12.13939123	12.14966925	12.41345185	9.66912347	12.62801557	10.10105131	10.04462573	10.05552463	9.522396332	10.73141892	9.533377112	10.67725996	9.632410064	9.931985445	9.893329985	10.17764176	9.51797267	9.15330815	9.676497337
ILMN_1656187	7.262794362	7.284547525	7.376366268	7.260152502	7.222392131	7.42811569	7.189513444	7.345618041	7.336260804	7.442908678	7.284295268	7.482459663	7.384965752	7.379376205	7.391754469	7.425608213	7.284890932	7.40630245	7.394086466	7.317965807	7.355977893
ILMN_1656189	7.283621755	7.296177848	7.368581054	11.74664567	7.222529477	9.793607833	7.214266015	11.50512676	11.43289591	11.5339333	11.5872234	11.927356	11.33249207	11.27592057	10.90190672	11.81206189	11.15024078	11.26333526	11.22352185	11.36552019	11.08302879
ILMN_1656192	10.41820348	7.27856695	7.110437651	11.3605237	7.188716431	11.04927953	7.22585105	11.66420335	11.91682608	11.9472567	11.56913856	12.0456957	11.47686688	12.27213471	12.27831227	12.06586211	12.40500211	12.13287363	11.77466589	11.84291904	11.6581447
ILMN_1656193	7.203078774	7.263973661	7.243284033	7.220089948	7.207733042	7.256944935	7.20150101	7.210342337	7.236721927	7.213200568	7.217992031	7.086818106	7.253794433	7.153932161	7.315401053	7.254031978	7.290985007	7.214817195	7.174619077	7.212632772	7.272915852
ILMN_1656194	7.733157056	7.299938196	7.368491312	7.550692418	7.224568654	9.587209828	12.08961411	9.790913283	9.366690248	10.37368227	9.264786559	9.269566344	9.175225084	9.736855613	10.49449488	9.192246037	9.098964252	9.11864727	9.088295056	9.092968578	9.711437324
ILMN_1656196	11.76909688	12.37083726	7.314785382	11.81955827	10.48760617	11.80277252	7.211707245	12.4963202	12.1089422	12.50733276	11.76183293	12.10110102	12.05132066	12.79535264	12.05252978	11.62191353	12.43576022	12.23063157	12.30131215	12.23692354	12.52278206
ILMN_1656199	9.566799478	11.53565955	11.82104796	9.411653958	11.7395083	7.978924475	11.99156631	8.075052822	8.030769593	8.074547267	7.886025168	7.965818499	8.020687657	8.099613167	8.040337988	8.077479314	7.876668486	7.951420112	7.798502884	7.876058214	7.90147299
ILMN_1656200	7.797063004	7.295914345	10.17081165	11.42600902	7.236936937	9.862347287	7.219398667	9.248764978	8.201163182	8.328528216	9.346693606	8.988477472	9.095170499	9.322855196	9.113711557	8.228939888	9.353108375	9.154337251	8.564853562	9.782155982	9.108001537
ILMN_1656201	7.237866071	7.332598418	7.168603164	7.280744393	7.223466206	7.306320106	7.211600365	7.283683044	7.28134193	7.260051521	7.277459793	7.308161474	7.256812386	7.288411078	7.271764492	7.261048463	7.360263459	7.271783136	7.334510535	7.347004388	7.334731979
ILMN_1656208	8.048911343	10.74197777	9.870658228	8.327225726	11.43756935	7.431482455	11.26815153	7.443846782	7.382229921	7.468897464	7.287289962	7.439432331	7.326575362	7.506080895	7.332700619	7.495748979	7.389758467	7.455672894	7.364697464	7.374049287	7.417088025
ILMN_1656218	7.373551764	7.29557577	7.282727352	7.356697645	7.222322857	7.312931636	7.208830362	7.315379238	7.310777762	7.336422906	7.289877253	7.382403613	7.344281535	7.366520247	7.355039699	7.333956154	7.404431308	7.296270724	7.373759226	7.35326033	7.379635066
ILMN_1656221	7.210025352	7.268416575	7.180383558	7.238294739	7.132276457	7.262063201	7.168132473	7.207905907	7.261051256	9.265747505	7.259533453	7.27165281	7.25219503	7.329232607	7.218723289	7.274661063	7.295935309	7.225049117	7.176899287	7.243264489	7.239390877
ILMN_1656225	7.474347538	7.236338252	7.213785023	7.38168796	7.258404967	7.712199878	7.213065141	12.61616402	7.708076081	7.643686093	7.788408003	7.611200104	7.624415361	7.749526565	7.606862712	7.657193871	7.649521991	8.014445545	7.605038836	7.626130344	7.635329975
ILMN_1656232	7.221204095	7.287315676	7.27853778	7.231496862	7.190189459	7.250251917	7.202363689	7.304699688	7.300329395	7.227686416	7.228090003	7.33901499	7.230975748	7.314475746	7.228252476	7.282047077	7.303551375	7.294214724	7.265747862	7.203449766	7.249541213
ILMN_1656233	13.43730706	13.99598104	13.92165488	13.84733178	14.24478641	12.62907727	14.34594169	13.69372236	13.53739897	13.40555205	13.20136892	13.50122175	13.14816307	13.30760599	13.42717383	13.7490743	13.49681205	13.5122863	13.60022081	13.02851792	12.85528036
ILMN_1656242	7.441066788	7.458540926	7.571512418	7.309533078	7.679797144	7.380849882	7.215556296	7.257837012	7.36316219	7.377100609	7.477935687	7.325110057	7.447477987	7.338713138	7.4149112	7.410180108	7.424370002	7.35516966	7.371530976	7.411582422	7.321703363
ILMN_1656248	7.211770261	7.266994702	7.24745546	7.279937165	7.211662526	7.393044968	7.213840457	7.373616227	7.273330587	7.338250571	7.3557511	7.366796021	7.379705807	7.508827757	7.423575091	7.706708422	7.304247484	7.289253086	7.542870686	7.608560418	7.362011765
ILMN_1656250	8.121598853	8.38291348	7.394769001	8.041094607	9.411243625	7.513151849	9.294464181	7.502394344	7.635547007	7.481537136	7.471744123	7.547319952	7.517553607	7.565432529	7.560235463	7.56318132	7.585623871	7.538879026	7.477422633	7.579596982	7.57514061
ILMN_1656251	7.20978689	7.29523058	7.357334235	7.238892781	7.213109633	7.270063283	7.754862787	7.191550959	7.315895393	7.130640093	7.363220197	7.309504063	7.3334518	7.273573094	7.216437896	7.271373816	7.276280192	7.262151615	7.284995119	7.278934422	7.283177577
ILMN_1656254	7.36970724	7.493530589	7.563396166	7.416177453	7.403057645	7.41365413	7.216322031	7.482656866	7.444730655	7.423741773	7.432842738	7.485607846	7.33704049	7.425222522	7.455388934	7.373913058	7.413143665	7.459433818	7.442044972	7.438641712	7.428124477
ILMN_1656257	7.83808463	9.135897803	8.218279194	7.732670041	10.38148065	7.403183916	9.882302758	7.457132617	7.53683475	7.49363347	7.503491732	7.435301775	7.392157005	7.484723257	7.449125632	7.575733058	7.496872334	7.42272575	7.516058051	7.4924536	7.351847498
ILMN_1656266	7.289550966	7.297468466	7.263066194	7.237461466	7.207560208	7.281447315	7.202199234	7.327510858	7.2945259	7.304717814	7.353872107	7.326111569	7.290478561	7.266359249	7.36372615	7.456514922	7.332686351	7.328478629	7.268877217	7.329918938	7.331212077
ILMN_1656274	11.72526687	7.259275707	7.260659035	11.78826749	7.208799905	12.47811293	7.204647333	11.20410194	11.89973753	11.69160639	12.00733748	11.81306391	12.18720862	12.15168075	11.95882383	11.38114334	12.05285232	12.10985716	12.08169709	12.11669844	12.2668084
ILMN_1656280	7.786649879	7.297240609	7.356743005	7.455822352	8.570466331	7.358016666	7.212208017	7.377122083	7.404199776	7.369513617	7.413032252	7.362822957	7.338278389	7.3796427	7.379481959	7.377491609	7.309591428	7.391245437	7.376330012	7.336696824	7.360986412
ILMN_1656285	9.48240709	7.322039344	12.00533267	10.84890655	7.203386827	12.90041751	7.201191001	11.51774797	12.10281567	11.19930056	11.28204147	11.54447031	11.35842321	12.05368533	11.91935062	11.39556317	11.97630939	12.21124895	11.35183781	12.76347857	12.93135528
ILMN_1656287	12.76636825	12.80613406	12.96322932	13.51344904	12.15412932	13.448239	12.92516793	13.06806948	12.94974773	13.26009333	12.58876727	12.35217668	12.1792889	12.38859644	12.29254455	11.24025536	13.12211282	12.71629318	11.58559175	13.56394994	13.39791578
ILMN_1656291	7.244105535	12.06817478	7.295589732	7.251757794	7.225027229	7.515674826	7.219765643	7.273663337	7.543450289	9.017848825	7.232074964	7.217627831	7.663983379	7.30112147	8.696444814	9.318441199	7.234468491	8.372691657	7.199038704	7.497944039	7.420478072
ILMN_1656292	7.287792358	7.240153182	7.251625947	7.306814203	7.221667503	7.355379454	7.350148428	7.242420991	7.291062617	7.427426945	7.190143922	7.309175307	7.349928705	7.31023722	7.2565249	7.399355245	7.21407847	7.364431932	7.425383121	7.334611215	7.229381652
ILMN_1656293	11.86487492	11.86529798	7.34758233	11.52835512	8.700806343	12.34428462	12.5440533	13.22634395	13.2252831	12.79187546	13.00135377	13.03639122	12.9195138	13.16581807	13.34661253	13.20647468	13.09666033	13.38023102	12.98102487	13.28616441	13.31010234
ILMN_1656297	11.15274698	12.21776383	9.158240688	8.018066257	11.44129388	10.90972634	10.77168895	7.774110905	10.27862511	9.838701856	7.647221669	9.35025829	10.14197925	9.126050937	8.893618858	7.870690163	9.682946583	8.369556905	7.70303793	10.06448067	8.534679203
ILMN_1656300	10.25542418	9.016663101	10.53679474	9.623841635	10.79839415	9.733238897	10.40212068	9.172888215	9.563060451	9.109988489	9.121600525	8.838894487	9.543778005	9.003053067	9.313188898	10.19116769	9.42077594	9.65919675	9.141623651	9.359343246	9.312280177
ILMN_1656301	7.290904027	7.291841196	7.328632848	7.25421716	7.226167874	7.325458307	7.217029938	7.240008894	7.235425165	7.278819613	7.282122495	7.299779727	7.32098415	7.231001163	7.236228946	7.222826569	7.346016583	7.247002165	7.237513495	7.210081139	7.285830333
ILMN_1656303	7.514684878	7.281180603	7.343947819	7.637796378	7.211984249	8.202431568	8.93420989	8.401165237	8.317394454	8.188806477	8.153224044	8.276696617	8.991054634	8.435517519	8.516479499	8.345769586	8.604743859	8.384023125	8.766773392	8.719335733	8.662921413
ILMN_1656310	7.207014829	7.237177672	7.265589724	7.214883955	7.200792158	8.676568153	7.214179507	10.02002892	9.374189746	10.92684699	10.80092625	9.348939353	9.949488506	8.317462458	10.50347978	9.503626827	8.253028261	9.276757451	8.085761963	9.059660142	10.28708559
ILMN_1656315	7.488862406	7.306649333	9.063712311	7.383157225	7.267352169	7.38711068	7.206438288	7.460142282	7.528154856	7.456189916	7.411687262	7.460123561	7.42328036	7.39241306	7.463828501	7.529816576	7.536001982	7.460118478	7.462730365	7.352321991	7.489431512
ILMN_1656316	9.875396164	7.909049329	8.618341371	9.161745526	7.434231671	7.823719447	12.21500288	7.859388366	7.949259221	7.877796942	7.732484265	7.795990622	7.796705571	8.278662233	7.76626738	7.841080131	7.733929866	7.767285115	7.721229793	7.794073135	7.709657611
ILMN_1656318	7.288578704	7.299498682	7.339308514	7.355296876	7.267507033	7.409763247	7.213406427	7.302038332	7.352109978	7.356448898	7.389796886	7.282722877	7.255157139	7.224977177	7.326807958	7.348630295	7.370074668	7.37689526	7.307933247	7.352608496	7.40150857
ILMN_1656321	12.09655953	7.253004765	7.303680464	11.6065853	7.220477462	12.5795304	7.1878378	11.094063	10.91056386	11.13311919	11.48483787	11.62547478	11.57767517	11.26638253	11.30920341	12.77150559	11.26716199	11.78216376	12.60090334	12.85806388	11.65594839
ILMN_1656325	7.205430975	7.264574812	7.315730726	7.241147515	7.139595252	7.336724532	7.205687416	7.280553527	7.272590621	7.144460427	7.320675764	7.362723027	7.18788822	7.296316372	7.233956501	7.281988846	7.034803723	7.269180557	7.272890895	7.253597571	7.313352092
ILMN_1656327	7.511464081	7.32438203	7.269684573	8.154108037	7.225744569	7.774861829	7.208517478	7.702939699	7.524901139	7.460664601	7.696140852	7.577842094	7.492550599	7.418133596	7.577355684	7.690754032	7.533593377	7.591402561	7.671965601	7.666490545	7.49230212
ILMN_1656330	7.487550667	7.337117128	7.399679671	7.379258052	7.282176709	8.167600073	7.43606816	7.39252924	8.322630442	9.015724762	7.468434816	7.412787137	8.294296001	9.263305722	8.00368575	7.426490331	8.86631979	8.363305332	7.393723137	7.454497162	8.081579605
ILMN_1656335	12.42778332	12.48827523	7.267661435	12.50916787	7.222599695	12.61171264	13.14060192	12.55315182	12.23975483	11.62031833	12.17190395	12.19187062	12.31046998	12.48098298	12.096644	12.78457223	12.31826317	12.36690461	12.37824515	12.59631484	12.35657414
ILMN_1656338	9.674038461	8.807242725	11.84679493	10.21914209	7.228307897	9.574486285	7.570578981	10.5916857	11.40196778	11.12319957	10.71022696	11.48475071	10.68412259	10.97636391	10.66834225	10.99338989	10.75660209	10.82205932	10.59465877	10.4037194	10.27061916
ILMN_1656342	7.26225507	7.576076176	7.340491506	11.88085597	7.218927125	9.329992386	7.216622935	10.77150731	10.65447811	10.56439486	10.6931563	11.51644529	10.63339955	10.689487	10.58962213	10.62393846	10.04758629	11.03465949	10.94826652	9.910008022	10.00899393
ILMN_1656344	7.244710948	7.289941608	7.297746959	7.282024565	7.196708307	7.239522186	7.200973721	7.369855497	7.214248901	7.319267083	7.310866554	7.154691182	7.205261448	7.204544613	7.181698825	7.24333703	7.259068285	7.243071104	7.345418867	7.320848432	7.258435037
ILMN_1656361	7.432142217	7.452456861	12.58419054	7.469340015	7.22179011	11.75140116	7.316660895	11.89402902	11.33084324	12.2001146	12.41128512	11.73782254	11.468616	11.32576294	12.04375533	10.92759547	10.54833571	10.67877103	11.69688414	11.31354741	12.07854296
ILMN_1656364	11.11840821	8.146177723	7.416722614	7.25779349	10.88577239	8.466232991	9.379194583	10.20536805	7.418701675	7.306397858	8.895720647	7.473973504	7.738805732	9.382677167	7.352871553	7.494542687	8.468467023	7.483641415	7.441840564	7.817493402	8.170940327
ILMN_1656368	14.89285077	14.35898512	14.06221152	14.84156103	13.2837949	14.75967169	13.73403915	14.87692274	14.85751868	14.44407825	14.56920193	14.64897714	14.56606685	14.61154893	14.67608251	14.59452044	14.76314035	14.93655263	14.39664015	14.76778528	14.88836045
ILMN_1656369	13.8844942	7.342378359	13.41456397	13.38650164	9.066271914	14.73264187	7.213924767	13.60247267	13.56982275	13.3117148	13.63127484	13.27726824	13.7577825	13.24699998	13.14367976	13.46350496	13.15996893	13.4083491	13.77546063	13.937431	13.8303318
ILMN_1656371	7.294898165	7.292824293	7.28075186	7.27262109	7.224836364	7.515737601	7.525827105	7.29822502	7.33265458	9.240904159	7.283430112	7.337723514	7.218714849	7.328875964	7.353512385	7.3628987	7.250117711	8.311231999	7.346632018	7.584588731	8.202488666
ILMN_1656372	11.53070933	11.89159197	11.82436799	11.71090468	10.88545215	9.676435014	11.96367998	9.16381135	9.34826963	9.257553881	9.026505964	8.892864521	9.311769208	9.36863177	9.066684616	9.059770403	9.059651396	9.081905928	8.963793381	9.164269787	9.059934461
ILMN_1656373	7.485049364	10.16733595	10.71095082	7.315050653	7.182154993	7.824723102	7.19765851	8.698659422	8.355325151	8.784796496	8.151005536	8.426653293	8.245264395	8.928027565	8.472458267	8.420556121	8.828829126	8.714918415	8.221455203	8.418672048	8.433902603
ILMN_1656376	10.25589396	11.61601697	11.87829986	10.79198592	11.69889211	8.611509806	11.96979123	8.874811469	8.924744104	8.687286459	8.285580103	8.119022999	8.101552923	8.230917931	8.444926946	8.566066002	8.376719876	8.435051779	8.369072392	8.303577123	8.144814242
ILMN_1656378	7.248714336	7.252415883	7.260883774	7.30499132	7.225238138	7.963097032	7.13930731	7.903161563	7.934961755	7.369028049	7.536591585	7.961917483	7.887224667	8.293289169	8.736162448	8.558649639	8.364050278	8.402281986	8.037372705	8.170822725	8.761994626
ILMN_1656379	7.25477278	7.263196498	7.289973931	7.38878276	7.202105699	7.293763628	7.212027586	7.308695097	7.360300734	7.322413815	7.307871107	7.381272036	7.398174695	7.331660695	7.390134348	7.416942211	7.291900635	7.26614489	7.339693981	7.274156221	7.349555661
ILMN_1656380	7.409205327	7.328963017	7.346264015	7.646950599	7.227357363	7.391357947	7.208721669	7.367895974	7.410509876	7.42507393	7.374589313	7.399896238	7.370401115	7.353078693	7.379942199	7.373187677	7.320609289	7.306601612	7.440283394	7.337934936	7.358013292
ILMN_1656382	7.27451924	7.262869551	7.44036919	7.23698638	7.225993347	7.421749741	7.180526693	7.374266186	7.406812235	7.465396919	7.430357791	7.434947389	7.474366455	7.400699427	7.385048319	7.5001899	7.507619901	7.411323733	7.43462238	7.369292071	7.455829774
ILMN_1656383	7.257875807	7.285149026	7.229469534	7.284797336	7.300351335	7.443886245	7.199876623	7.319317281	7.287855121	7.325520475	7.38914103	7.333043412	7.275864026	8.373831184	7.360397449	7.290357954	7.301803502	7.242381989	7.286808817	7.342176546	7.261751046
ILMN_1656386	7.304158061	7.294546039	7.349015291	7.263822328	7.31575534	9.318832629	7.202980402	8.641331176	9.530485809	8.38204694	9.276231105	8.979178905	9.149215579	9.145201159	9.823659124	9.044600818	9.327698249	8.835513648	10.01006614	9.563474075	9.66148229
ILMN_1656393	10.30616557	11.68323473	11.84191146	10.52548681	12.12539254	8.095113146	12.18167834	8.949139585	8.77395238	8.683298073	8.409508877	8.583279838	8.290839298	8.624358753	8.532250703	8.753466156	8.366642533	8.401418436	8.444536745	8.190235766	8.079876551
ILMN_1656395	7.221649705	7.289377491	7.275490547	7.453879403	7.245514531	7.363000993	7.201823635	8.722052012	7.350110042	7.407915211	7.254075655	7.335918595	7.230672645	7.203287219	7.416222831	7.14891512	7.317623683	7.355215253	7.382022679	7.373453167	7.342107419
ILMN_1656399	9.980754562	11.14341292	11.84197656	11.2391465	9.161803904	10.43516198	11.84335491	8.379594078	8.363673358	8.259471995	8.309032554	8.432351564	8.762834637	8.611725785	8.83376787	8.687850261	8.792410854	8.896574925	8.830252882	9.433668797	9.08725365
ILMN_1656401	7.721970736	7.611791774	7.344294424	7.507962598	7.208474207	7.512925544	8.027823584	7.399869587	7.517040573	7.523652053	7.498972551	7.467307789	7.383228038	7.586276839	7.438299332	7.452395958	7.4191281	7.418923757	7.481779209	7.441092557	7.447161931
ILMN_1656402	7.259114034	7.28589315	7.293560207	7.233772414	7.219329821	7.364301217	7.212942856	7.347876233	7.271298319	7.24960383	7.323267017	7.273093572	7.274859388	7.232916521	7.276965377	7.326162373	7.265212078	7.267748215	7.248410856	7.326130356	7.386995874
ILMN_1656404	8.482545269	9.827180121	10.02127337	8.624623444	11.26972914	7.614784141	10.65423772	7.789290166	7.616021677	7.754576244	7.579877803	7.608393304	7.617998726	7.714387614	7.621069425	7.704092756	7.635399389	7.670456578	7.573976779	7.59411367	7.550779044
ILMN_1656407	7.278247909	7.875729248	7.245893475	7.471001217	8.077326019	7.317044954	7.209553907	7.373792254	7.279328021	7.325205396	7.376940424	7.294135472	7.371207172	7.287512446	7.329320314	7.408572672	7.354661417	7.328613845	7.373127193	7.278791254	7.29054542
ILMN_1656409	9.246397195	7.280957657	11.85717938	7.292165015	7.161790049	8.937587365	7.163392863	9.321843729	9.345549324	9.392011859	8.992161723	10.25911798	8.858047175	9.456261154	9.481049093	9.949450169	9.598531211	8.722748737	9.902393234	9.310447227	9.261058922
ILMN_1656410	7.212171446	7.19976667	7.262621622	7.215644857	7.179261273	7.757697231	7.197127369	8.567769587	7.238699977	7.179796597	7.289056317	7.296693098	7.663513672	7.16742538	7.272925569	7.186459095	7.245589935	7.796497424	7.878382227	7.651835435	8.039620199
ILMN_1656413	10.75795477	8.182496267	7.545677755	11.39007129	11.63441152	10.72893787	7.255302246	10.00787193	10.38720078	10.09302655	10.06315375	9.678679478	10.71351006	9.418127699	10.43860377	10.02584996	10.45788197	10.27197687	9.775903183	10.81136953	10.5131801
ILMN_1656415	12.04417508	7.231740241	7.627460292	11.97425017	7.212687238	12.15208111	7.211444415	12.53556228	12.46507496	12.36761421	13.04092846	12.42353911	12.85715854	12.83329535	12.40952159	11.96196428	12.76991332	12.46310744	12.78355451	11.94381513	12.89768037
ILMN_1656419	9.744637452	7.319645216	7.58626627	11.73740187	7.452845921	9.058248711	7.564374631	8.231770914	8.027075281	7.481246996	7.782569454	7.776951218	8.124142075	7.479767411	7.839190925	8.100503527	7.685415514	7.878035423	7.448778532	8.501606599	8.165259599
ILMN_1656420	13.17139953	13.70461087	13.32713737	13.222105	13.30253321	13.36354273	13.47403144	11.61220026	12.07292631	12.32557962	12.14487896	11.62407834	12.6429108	12.44042666	12.38752901	11.59350949	12.89966038	12.20211444	11.78538102	12.68810913	12.63166662
ILMN_1656421	7.314682293	7.293525225	7.331374942	7.419428912	7.21700852	7.386882029	7.213546417	7.283271321	7.302407189	7.32428552	7.397545699	7.436901229	7.462440469	7.321236361	7.403931648	7.374817563	7.310318084	7.325331456	7.337703328	7.391248604	7.397332326
ILMN_1656422	7.224376636	7.296626844	7.318917126	7.275015639	7.176887982	7.281118891	7.19478685	7.176022947	7.231126433	7.314921602	7.28715286	7.167688196	7.322356669	7.264663012	7.227399919	7.214830044	7.281088286	7.245981857	7.234505108	7.159154306	7.281492751
ILMN_1656424	7.290418125	7.268494018	7.326330955	7.315559085	7.222021471	7.309961507	7.182699442	7.336581386	7.35066166	7.295185739	7.290406015	7.427663589	7.309449708	7.581637807	7.356229039	7.32106474	7.317143014	7.266495057	7.332601431	7.349657995	7.356269185
ILMN_1656427	7.418507999	7.291131693	7.350135644	7.512195312	7.221462714	7.38738304	7.205065124	7.378174411	7.48172898	7.362395936	7.462206868	7.405969103	7.353080969	7.400048003	7.475360075	7.437168901	7.401352549	7.464371002	7.413485911	7.36390261	7.424419652
ILMN_1656429	7.504962223	7.812027151	7.398150787	7.506477839	7.218602839	7.381268764	7.38388192	7.430092583	7.378843885	7.445507231	7.40540551	7.4436324	7.454664705	7.390199788	7.376782078	7.341509088	7.444551301	7.467424969	7.314102196	7.392431198	7.438900763
ILMN_1656434	12.32915656	10.01668679	7.387455076	12.30210009	9.652363051	12.1908867	12.8507893	12.85723628	12.5398143	13.10587603	12.85802934	12.97514518	12.5581122	12.74705367	12.0066713	12.83398632	12.46939771	12.81493168	12.80125394	12.40841341	11.99761404
ILMN_1656436	10.70122095	7.257406901	7.153220071	10.59981308	7.200830688	10.44545544	7.188313767	10.63612141	10.12977939	10.0167501	10.14819812	10.66801541	10.24539286	10.69784634	10.06192998	10.1435196	10.02519731	10.11162303	10.09889722	10.11713142	10.04228073
ILMN_1656448	7.362810685	7.141570672	7.23396431	7.216333965	7.403039469	7.247707824	7.205998496	7.572725824	7.309520991	7.173812321	7.156794274	7.168776085	7.305871342	7.231203341	7.247493475	7.223853953	7.234321685	7.193168758	7.24434088	7.195973528	7.262089991
ILMN_1656452	7.207811822	7.162925794	7.179354003	7.248952914	7.170035611	11.05778505	7.169587532	7.247536093	9.627823603	7.198681364	9.863129088	9.510443261	9.922350198	7.203680152	8.472041811	7.231959205	9.027365714	9.435093544	7.243489042	10.0427611	10.27196011
ILMN_1656463	7.600659481	7.622848969	7.344731885	7.37033838	7.913356847	7.59985408	7.213397435	7.551738393	7.544543819	7.64471526	7.601603158	7.557029509	7.53495784	7.778233703	7.684217309	7.814608081	7.621735805	7.595716475	7.716899618	7.580200644	7.665600016
ILMN_1656472	8.004949938	7.368641143	7.496378874	8.126423199	7.825590289	7.557647821	10.18512785	7.661422906	7.555167123	7.626844281	7.50976657	7.714498754	7.622467869	7.670552653	7.797595149	7.694168872	7.582733162	7.609418142	7.593634911	7.5365108	7.558653991
ILMN_1656477	13.97813551	13.53688021	13.86927942	13.73541587	13.2651195	12.76695325	13.54214967	13.71989711	13.67748806	14.1665784	13.47374939	13.79307947	13.18924865	13.1355654	13.69478844	13.74412518	13.77752668	13.33810495	13.574443	13.16121167	13.11358535
ILMN_1656482	12.20314669	11.81323739	12.47547558	12.18028409	11.48102771	12.11344574	11.83323521	10.64343956	11.45689585	11.69929742	11.35668982	11.17872785	11.59683435	11.60123905	11.44194382	12.39194022	11.58127881	11.550408	11.28709524	11.64128865	11.79173312
ILMN_1656486	9.67637385	11.5342902	11.65759922	10.89016147	11.59010139	9.572484099	11.92167829	10.12712937	9.911530461	10.08395331	10.04311953	9.780167442	10.1967766	10.57099438	10.43588032	10.23986952	10.22452154	10.00055661	10.26955977	10.53404715	10.39357578
ILMN_1656487	8.950718125	7.483297846	8.558175232	7.970250231	7.365325121	8.04258031	10.0428251	8.523815485	7.715330096	8.102824464	8.073219787	7.751424369	7.81930535	7.699629101	7.714028757	8.191652353	8.011113645	7.691100447	7.890133867	7.85644303	7.706866215
ILMN_1656492	7.515152764	7.294190613	7.258015245	7.341762943	7.210088994	7.257402833	7.204964024	7.283411612	7.462196505	7.338726445	7.281737686	7.316814492	7.373004854	7.301167543	7.301139588	7.33919628	7.192931068	7.318513474	7.308358443	7.26071476	7.288869174
ILMN_1656495	7.514434083	8.254254358	7.44560406	7.629095656	7.245349273	7.391439141	9.721910513	7.507027504	7.457779235	7.438981915	7.523170267	7.552467311	7.392556159	7.523044027	7.535003815	7.55409356	7.535075716	7.358203829	7.515793797	7.475736902	7.457382841
ILMN_1656496	7.375717087	7.297427104	7.266455567	7.478754972	7.253134142	7.428232873	7.31310048	7.394644857	7.421066809	7.284537906	7.461899282	7.433772097	7.487549	7.436567335	7.363843204	7.339231505	7.393298616	7.295666613	7.424375966	7.403261904	7.383176278
ILMN_1656501	11.91712121	7.770659778	11.89581863	12.05365789	10.86071802	13.14744725	8.27182725	10.86138623	10.64792023	10.13284985	11.03560898	9.856202615	10.60530116	10.14083282	10.68144993	10.46862497	9.64907937	9.988347736	10.30470618	11.0100986	11.15766814
ILMN_1656502	7.256285587	7.253432002	7.312573617	7.230558274	7.247899632	7.246375545	7.195226091	7.192218264	7.324031938	7.297519791	7.281846204	7.272721563	7.318161114	7.345283318	7.32139974	7.188211033	7.201700836	7.385309072	7.189265324	7.325074125	7.247370619
ILMN_1656504	10.78016799	11.62112772	11.82337583	11.21221487	10.89680088	8.603467773	11.96211331	8.557111706	8.687737478	8.733924276	8.386212261	8.578484839	8.497639769	8.680641541	8.665411376	8.834969339	8.576540576	8.588247187	8.490441983	8.420626451	8.500728934
ILMN_1656509	7.457608464	8.032036918	7.37031031	7.583157731	7.251047491	7.382528265	7.213897111	7.386676704	7.48799674	7.592593831	7.425607194	7.492295063	7.345709204	7.478780631	7.474704761	7.444886436	7.462417768	7.472577156	7.376029131	7.385962532	7.404285868
ILMN_1656521	11.65844328	7.302607553	7.35549725	11.76847282	9.620658497	10.53398873	7.333725762	10.95743953	11.16530768	10.4377919	11.29996947	11.22002902	11.61372318	11.07409275	9.579179052	10.58888167	11.4367952	9.984415738	10.45709635	10.34511882	10.80893153
ILMN_1656525	7.366207133	7.434633391	7.363888833	7.348581019	7.225820249	7.356517819	7.209652464	7.311170722	7.354570248	7.308282749	7.380136641	7.454888399	7.353054078	7.3717081	7.303152372	7.459520306	7.386953417	7.31069585	7.377662918	7.383643013	7.386808589
ILMN_1656527	7.384492235	7.298004894	7.35291207	7.575163574	8.26244085	7.377237553	7.545034056	7.315177644	7.311746302	7.350332442	7.368488012	7.405994895	7.372046362	7.415714047	7.391900398	7.393577187	7.25370399	7.387057476	7.403340686	7.356296455	7.334967855
ILMN_1656530	7.232998023	7.284865715	7.347650727	7.233761817	7.210300834	7.345755432	7.208002741	7.322735073	7.412376482	7.37782363	7.258174558	7.265269177	7.305080729	7.308863965	7.334654235	7.290598349	7.28063103	7.329091564	7.337758557	7.282898815	7.35925863
ILMN_1656534	7.406260837	7.276285093	7.334597593	7.434010539	7.207208343	7.425714352	7.226142076	7.263304956	7.366190909	7.354862401	7.423975213	7.364089127	7.40598561	7.401944071	7.29795605	7.366614922	7.407066763	7.409706144	7.333506436	7.386192909	7.372726731
ILMN_1656537	13.20804076	11.79434043	12.09615538	11.9844843	12.24529246	11.87498928	7.206229667	11.68503334	11.53790358	13.17844106	13.11403846	11.55140973	13.19722145	13.31829913	13.59555919	13.42711827	12.2357919	12.14926895	12.38440174	13.23930849	12.14937979
ILMN_1656540	10.51598141	7.280995387	7.367828124	10.7107077	7.219910933	10.08916636	7.219206022	9.776483641	9.66372257	9.997012615	10.3328115	9.990778105	9.667384732	10.09688507	9.998122496	9.634728334	10.03702347	9.839463902	9.954155559	9.830813494	9.929938467
ILMN_1656545	7.989986895	7.951943207	9.121497134	8.342856017	7.224067157	7.455500025	7.691629177	7.563547575	7.609408301	7.602959138	7.572616354	7.464384071	7.511938583	7.580713611	7.60820517	7.628810825	7.550318807	7.443083754	7.57029059	7.4309294	7.429533609
ILMN_1656546	11.62174365	7.293391537	7.338330302	11.89043649	7.219370732	10.66573831	7.222602184	11.8472289	11.94916707	12.52870065	11.48200491	12.48721553	10.98809549	10.98562678	11.40281506	12.10663677	11.84116159	11.65668951	12.10899702	11.35855437	11.38403748
ILMN_1656553	8.064752012	8.510892813	7.874831667	7.82834124	7.338262789	7.778095924	7.982635244	7.749380435	7.881353301	8.046200576	7.912781684	7.723220611	7.930912622	8.066390567	7.840656458	7.805563003	7.769571323	7.82765098	7.836425261	7.865648905	7.783742315
ILMN_1656554	7.388190216	7.370659651	7.360492103	7.611171372	7.762187276	7.443099036	7.958718847	7.329458317	7.439381126	7.446522893	7.422548969	7.485578138	7.430342859	7.501034687	7.405523069	7.459592852	7.489464281	7.412853826	7.460458076	7.485804721	7.501429623
ILMN_1656557	7.587264864	7.319927892	7.392670112	7.837867487	7.44428215	7.52623561	7.214745564	7.571712983	7.595359937	7.705313376	7.567522728	7.747198426	7.536062314	7.568216713	7.717267692	7.86227538	7.687032894	7.65249906	7.576286654	7.544633306	7.559973972
ILMN_1656560	7.259779804	7.270849032	7.298075283	7.223786776	7.205587491	10.34211508	7.188416076	10.82513219	10.76820938	10.12102086	10.79966235	11.32072515	11.01106639	10.30794475	10.87155951	11.41165013	11.76736197	11.66561707	11.51547814	11.11626039	11.59289445
ILMN_1656562	7.527066335	7.282475016	7.348174862	7.4457326	7.209450382	7.364325485	8.133778012	7.3023391	7.334595599	7.453052112	7.377212461	7.337221473	7.340219955	7.312471962	7.341688469	7.396815723	7.325642789	7.379045459	7.478153994	7.343840324	7.41404523
ILMN_1656563	14.38439966	13.37575892	13.12840205	13.4349342	7.223547878	12.957078	13.23548648	13.64342423	13.40734198	14.05681553	13.69348292	13.81964966	13.47084869	14.14644272	13.85493956	14.08038941	13.7961584	13.85537781	14.11292108	13.8159199	13.53265645
ILMN_1656574	7.907428701	7.2943342	7.355107419	8.364363737	7.228104306	8.414543304	12.11374123	8.308703265	8.574147148	9.261160309	8.611632753	8.103552801	9.014766944	8.437649817	8.882703124	8.880713162	8.636532307	8.992667354	8.607376083	8.630456091	8.36846231
ILMN_1656576	7.294561216	7.246129213	7.365039285	7.257589563	7.202853126	7.558763827	7.196827746	7.287684024	7.288722565	7.38997224	7.86416117	7.32860804	8.124303566	7.385714951	7.427282106	7.424878133	8.279606977	7.293793084	8.919688472	7.387848475	8.299120756
ILMN_1656577	7.215887169	7.239597569	7.201753969	7.245237007	7.204561431	7.184622878	7.172487366	7.220586914	7.272056863	7.210492331	7.243624993	7.183380044	7.252868572	7.210795038	7.283364571	7.128984008	7.227430359	7.213760576	7.177892965	7.241456272	7.229635524
ILMN_1656579	7.558759258	7.272540842	7.417328237	7.568614202	7.23707072	7.480633223	7.209482247	7.474960944	7.424341551	7.49572545	7.440130996	7.530441899	7.387051844	7.52261382	7.422236787	7.435230444	7.458550843	7.487502662	7.399535038	7.456423969	7.458648391
ILMN_1656589	7.421406443	7.402938407	7.515566806	7.731072999	7.921986507	7.404307978	7.263814856	7.501653569	7.404995742	7.490495583	7.444678941	7.412999604	7.349915973	7.383288753	7.361505893	7.441047838	7.409007183	7.415567019	7.358166783	7.359582957	7.344974847
ILMN_1656593	7.514360625	7.413625267	7.372818554	7.380470449	7.230225789	9.000049331	7.224294499	8.544974843	7.466824938	7.425370554	8.509834401	8.799702785	8.168023154	7.414213187	7.658410533	7.335344172	9.121514909	8.350803398	9.712608535	8.031379128	8.363807721
ILMN_1656595	7.383939367	9.974419366	7.519431048	8.220187507	7.225827437	7.50618018	7.909750411	8.988343335	7.567503262	7.50719235	7.501496063	7.59849587	7.434622732	7.495207208	7.641013323	7.650107868	7.504858718	7.576482936	7.615548351	7.516764405	7.499087297
ILMN_1656600	7.548959488	7.328400146	7.37923876	7.547356375	10.20953005	7.364759999	7.242058119	7.431343415	7.452000695	7.382660631	7.292180047	7.39904387	7.371591802	7.43169102	7.421723081	7.40392515	7.39844577	7.384950647	7.398937798	7.380582238	7.401553528
ILMN_1656604	7.217347581	7.279186391	7.336121401	7.245299687	7.229722548	7.258725505	7.213267536	7.27349394	7.328050355	7.252590645	7.314006759	7.255753648	7.218038771	7.285242903	7.283333474	7.219277296	7.242810044	7.298350591	7.273982292	7.20031383	7.250083368
ILMN_1656615	7.272756945	7.297059361	7.338010703	7.318130583	7.222176873	7.362647436	7.193436316	7.406373671	7.448245947	7.479419971	7.470874286	7.439925188	7.403285438	7.41035635	7.474175454	7.432702186	7.462122782	7.327686183	7.496979598	7.435381711	7.408332144
ILMN_1656617	7.21666678	7.271959497	7.344532667	12.1044869	7.318223513	7.963905897	7.199002691	7.282532373	7.310151359	10.91221089	7.34198924	7.306784423	7.276404495	7.236361999	8.879376844	7.237674541	7.217121332	8.715078641	7.225319272	7.353351134	7.282000736
ILMN_1656619	7.421909594	7.292898722	7.274889789	7.345225623	7.224384774	7.299905034	7.283615264	7.265400556	7.235990119	7.299116592	7.261153174	7.347407471	7.330444693	7.06832574	7.242018446	7.199788226	7.322411999	7.236274965	7.240582774	7.255376316	7.260362152
ILMN_1656621	11.98546274	13.54470843	7.355604864	12.53331759	13.83673084	11.81237995	13.5043478	9.116670973	11.0708354	11.39645293	11.19972463	11.27464296	10.81042468	10.07290044	10.55627307	9.565614929	10.23809782	11.11604993	10.86184374	11.29568656	10.70440276
ILMN_1656624	7.978837358	7.509089669	7.413571484	7.732465717	8.738717788	7.55822062	8.652560846	7.647647723	7.606281953	7.584257625	7.494442344	7.501355016	7.531459402	7.558912968	7.524408993	7.655838554	7.500478651	7.554708187	7.45737055	7.477398065	7.456091641
ILMN_1656625	12.08740343	12.01799339	12.35366651	12.33032437	11.95952008	12.31978295	12.01452606	11.34219177	11.09850973	11.70633993	11.4879543	11.27315392	11.30108147	11.41109843	11.54477561	11.54414306	11.55590619	11.65026795	11.85751076	11.41624655	11.42391078
ILMN_1656628	13.51303545	13.29067889	13.77391462	13.15927851	13.37553425	13.702134	8.329172188	12.49239197	12.52056249	13.11472411	12.69329307	12.6672751	13.18888698	12.99842182	11.65678006	12.10363532	11.87265375	12.15964096	12.24217619	12.63004606	12.88639699
ILMN_1656630	7.296517653	7.285131933	7.339294246	7.306526093	7.226997265	7.277882822	7.268854779	7.259415128	7.254955193	7.284151934	7.213745002	7.279560003	7.315653087	7.299019487	7.354306829	7.294953997	7.303207026	7.267991992	7.213370564	7.338794841	7.242178763
ILMN_1656635	7.4786495	7.619944981	7.456342976	7.457368577	7.225357032	7.42219089	7.283545858	7.463399149	7.65066062	7.674763745	7.445279136	7.640992471	7.484074431	7.615628051	7.465602083	7.435963119	7.56606221	7.538458179	7.427842597	7.516004402	7.520692845
ILMN_1656636	7.952118232	8.236483222	8.352530761	7.68647118	9.170010085	7.494528204	8.267109946	7.44553514	7.569874288	7.543308432	7.468036593	7.567129241	7.424363553	7.532401821	7.471098706	7.51836151	7.579239575	7.538340432	7.47854462	7.491871469	7.475311745
ILMN_1656637	7.530408971	7.296448105	7.912672776	7.534710005	7.225367741	7.348761943	7.177786736	7.480582271	7.525432222	7.491092746	7.405730716	7.449864219	7.458164884	7.524637455	7.454457648	7.544060608	7.4779374	7.385555565	7.374003697	7.39373431	7.400999785
ILMN_1656638	13.40197334	12.82401469	13.58004392	14.10370606	7.225261979	15.44330161	7.567112189	15.46744461	15.44368386	14.6092455	14.65739179	15.32184969	14.90474052	15.32966787	14.91795536	14.21279468	15.26840707	15.4332221	14.23736349	15.18467125	15.33387161
ILMN_1656647	7.230473634	7.213610666	7.336695896	7.305581478	7.217429171	7.188380349	7.178288119	7.2094985	7.294391477	7.221298965	7.315003124	7.244114544	7.2191485	7.218862784	7.325787233	7.159062056	7.1791036	7.277977326	7.191695608	7.292922826	7.218741001
ILMN_1656655	7.607469004	7.376380753	7.351139782	7.45547927	7.239859631	7.408288792	7.202977222	7.421525851	7.367701804	7.442296902	7.414868595	7.442196963	7.472758168	7.396162425	7.39198418	7.434114895	7.402420575	7.37427844	7.340275814	7.405004528	7.435045004
ILMN_1656656	10.2378719	11.581624	9.299372636	10.33355595	11.52031306	8.1860973	11.99926806	8.7947275	8.645254964	9.076551856	7.982297364	8.527573605	8.547604936	9.378203733	9.277466916	9.762368186	9.14044535	9.335079159	9.135090203	8.600421675	8.617003752
ILMN_1656662	7.343447151	7.494879484	7.777062089	7.773145442	7.280893067	7.432979019	8.124011257	7.462001749	7.6571511	7.49197529	7.491897325	7.502588678	7.459776328	7.539711722	7.587076615	7.558703887	7.45104563	7.470392088	7.524082289	7.51272789	7.481502037
ILMN_1656670	7.467516369	7.285725243	7.163376813	11.45504273	7.215664882	7.978030859	7.207850913	7.344149953	7.539870326	7.416654473	8.341635099	8.118557365	7.838056648	7.348663478	8.02245127	10.7279195	7.721719073	7.547678164	8.397401229	8.065357461	8.707892923
ILMN_1656672	8.065334402	8.032950526	8.474035006	7.497341719	7.3883823	7.635818967	7.462340241	7.709357283	7.628321648	7.601435748	7.538321124	7.56567538	7.498226262	7.48876819	7.556629544	7.591079997	7.572246342	7.478047354	7.585315249	7.581834994	7.530406447
ILMN_1656676	11.44779244	7.556257245	11.83529362	11.79016696	11.84330674	12.08596086	7.161719145	12.36026662	12.08111314	11.71045494	11.44680513	11.57588827	11.28846284	11.24579337	12.09596831	12.21851035	12.21328736	12.42280054	11.75974404	12.32348066	12.07184904
ILMN_1656678	7.211164533	7.534678191	7.318316652	7.262539078	7.231254044	7.208495043	7.213315325	7.246930053	7.308612748	7.329810654	7.333365843	7.368573944	7.321330715	7.370218713	7.32810129	7.32290249	7.383260547	7.293093736	7.340824537	7.354105502	7.332123616
ILMN_1656682	10.63719632	7.248763341	7.073307571	11.73399973	12.99236464	11.23375615	7.20363653	11.38013557	11.58457621	11.02177808	11.19959753	11.26174421	11.83987713	11.97231772	11.94618322	11.56319386	11.96725725	11.56552948	12.09970224	11.97686544	11.99702798
ILMN_1656684	7.220606314	7.245840558	7.131353709	7.287253614	7.20314714	7.25158353	7.201694868	7.257172653	7.249486006	7.235440766	7.254251845	7.220075083	7.26610447	7.240959507	7.18978733	7.114878327	7.199713718	7.196784421	7.226169056	7.285376726	7.24893793
ILMN_1656691	7.202992641	7.268465775	7.27822207	7.246499145	7.158346951	9.991795331	7.197194922	7.253041643	9.927352454	10.13883474	9.895808594	9.067760136	9.031556378	9.779377908	9.105279971	7.211934461	9.680248106	10.06352303	9.931664758	10.24608403	8.883625599
ILMN_1656698	7.270767513	7.323547918	7.360322948	7.2854601	7.223407078	7.337152348	7.215736242	7.388039361	7.327631058	7.274443243	7.23012589	7.356208483	7.368791132	7.329670326	7.30945679	7.368705893	7.261951211	7.312437554	7.336339683	7.384665195	7.269017342
ILMN_1656706	7.566144927	7.285071652	7.356221796	7.610025874	7.208014727	7.510430933	7.209474482	7.669804792	7.58331117	7.618674211	7.462092841	7.476543434	7.465839349	7.472382429	7.435562505	7.476632252	7.552264989	7.475789656	7.411403667	7.497801313	7.434290388
ILMN_1656713	7.359817993	7.291050337	7.37543353	7.272948972	7.216562829	7.314308683	7.225046953	7.290199493	7.319673849	7.319461101	7.322118393	7.316858492	7.347048132	7.336290554	7.32466542	7.321256334	7.378862304	7.29511067	7.325937052	7.264318977	7.380135579
ILMN_1656715	8.743412589	10.83625518	9.965527749	9.450828641	10.21733929	7.900624187	11.74922473	7.824753558	7.790234316	7.82007581	7.837369511	7.85331731	7.845805959	7.959199935	7.781729673	8.067027791	7.977046701	7.966048885	7.977941113	7.823006492	7.918641357
ILMN_1656718	10.29112085	7.272776989	7.366841529	9.85100887	7.224542316	9.623828062	7.344024872	9.226764253	8.978698653	9.422100619	9.820957643	9.050642954	9.19950164	8.403119795	9.307173797	9.581736279	9.531676297	9.28914113	9.498826205	9.334203846	9.054564238
ILMN_1656720	7.235387501	7.276699871	7.344234684	7.258312877	7.211657126	7.213065913	7.622763987	7.235032001	7.258065068	7.228221666	7.288036101	7.326832712	7.244517412	7.253242088	7.278999119	7.203130026	7.246226726	7.280944715	7.171867644	7.258261666	7.140508132
ILMN_1656722	7.315979141	7.319237825	7.32531492	7.230588084	7.218957803	7.255035928	7.203978945	7.265381636	7.290287831	7.240232851	7.246906523	7.257157137	7.316533054	7.331026426	7.266191087	7.277337943	7.316919563	7.361975606	7.330358424	7.334943245	7.297169943
ILMN_1656724	7.238674088	7.253946098	7.299764283	7.2393468	7.21704121	7.272674158	7.190388541	7.261418319	7.215231466	7.286576213	7.312040774	7.257711191	7.241757512	7.197899197	7.214705291	7.226899584	7.252806147	7.26922823	7.236615952	7.253296057	7.252621883
ILMN_1656732	7.252018536	7.269642474	7.285121002	7.404344896	7.221330235	7.309974291	7.187420517	7.252512871	7.234941398	7.186665621	7.376157776	7.255490935	7.283262694	7.258317172	7.274010165	7.15061296	7.25957153	7.153898373	7.219424548	7.27106952	7.222972864
ILMN_1656743	12.13301998	7.30404848	7.323372299	12.10911666	7.209038801	11.5525625	12.57330501	12.14448701	12.36907035	12.14141332	11.88296034	12.06705854	11.62170578	12.7473767	12.47047737	12.2142461	12.54871242	12.55030194	12.12685807	12.23361423	12.11442494
ILMN_1656744	7.217941142	7.25163001	7.121871762	7.23646423	7.189109473	7.301197456	7.205824518	7.333410331	7.350671207	7.274056625	7.35431087	7.444462165	7.304609236	7.327291666	7.298187651	7.339276397	7.310700268	7.246152789	7.304421072	7.287665823	7.227802403
ILMN_1656746	7.230619419	7.289820938	7.2901818	7.214704133	7.1905972	7.216357342	7.195053883	7.244241892	7.201811792	7.261071235	7.305580531	7.181203851	7.294694214	7.266282761	7.212028173	7.313201825	7.205220752	7.270320313	7.241465798	7.244367909	7.288212375
ILMN_1656761	12.63898349	13.82018221	13.95338925	13.29975271	14.53342279	8.836743763	14.41801893	11.08671343	10.48825054	12.048327	10.43264657	11.35894774	9.842833983	10.19729719	9.860895795	10.74361879	9.921165695	9.61509021	10.54465903	8.788214931	8.402994292
ILMN_1656767	7.21265717	7.294859476	7.363796667	7.298874327	7.224699676	7.290845927	7.255594654	7.37960476	7.253057934	7.290195702	7.174407642	7.258919946	7.26519998	7.338891174	7.314154886	7.173267326	7.273130562	7.435564136	7.301834692	7.258509985	7.307868229
ILMN_1656772	7.211034507	7.29736622	7.2277359	7.236863883	7.211701222	7.33812276	7.190853493	7.248077104	7.200221431	7.282357832	7.290756158	7.268317601	7.252223287	7.259333364	7.294013132	7.194745993	7.329587217	7.272550731	7.244510137	7.186406184	7.190790371
ILMN_1656779	7.241269762	7.276170889	7.29827003	7.216763579	7.214146621	7.193934713	7.206373256	7.217883439	7.261720919	7.263187887	7.167591517	7.251392044	7.213056882	7.309253875	7.372954057	7.21423827	7.285785707	7.235531597	7.277169123	7.286932964	7.331969533
ILMN_1656791	7.683857947	7.913713203	7.982943236	8.363192784	8.3405277	7.537626046	9.626174796	7.618041578	7.618731772	7.605705571	7.601152933	7.583676368	7.582405224	7.624859613	7.508286978	7.687042602	7.595694376	7.534574595	7.523462441	7.537007812	7.606074362
ILMN_1656792	11.82273782	7.293896648	7.53311598	11.96510083	7.520283646	12.80015236	7.214724054	13.03991189	12.57525214	12.77995876	12.68366854	12.49212132	13.11373935	13.07284437	12.86373294	12.65519776	12.73168088	12.87718426	12.28187475	12.57770754	12.1767873
ILMN_1656798	7.865917863	7.943532816	8.182084151	8.077183041	9.001491842	7.882451399	7.268750316	7.943676779	8.823213437	7.887061963	7.897001468	7.884770276	8.01053039	8.198667386	7.86307223	8.077444879	8.165183643	7.841130451	8.004853731	8.121845176	8.037436715
ILMN_1656801	7.383351921	7.288808193	7.350218276	7.326913464	8.442298577	7.3634363	7.212943027	7.356776078	7.318678343	7.505551821	7.394041986	7.520438577	7.423178863	7.351827928	7.288968174	7.43050213	7.396962163	7.21445138	7.348814988	7.411936674	7.372366322
ILMN_1656802	11.57294567	11.50719203	7.19628354	7.247542126	7.187066977	9.735491109	7.189219017	9.830135779	9.240534199	10.1298359	9.581316353	10.72927257	9.313795185	9.457271639	8.30887487	9.968909329	9.632884077	9.374097532	10.61810149	8.404810206	8.674040616
ILMN_1656807	15.76239876	15.1641134	15.45611725	15.75952152	14.46367142	15.3911856	14.9861961	15.69410156	15.50211016	15.60159419	15.5680486	15.4490211	15.5795769	15.60496254	15.63910351	15.57317981	15.60597581	15.58844029	15.72921663	15.3668409	15.19866033
ILMN_1656812	7.242172681	7.272652488	7.244810566	7.235407637	7.208192909	8.84016348	7.232892692	11.51862912	7.316119374	7.192981551	9.292840815	11.28704986	8.032580035	7.22458938	7.286845129	7.253170887	8.708699038	9.088427885	7.254044758	8.055380946	8.624341216
ILMN_1656817	7.21615093	7.27693619	7.345961408	7.256449449	7.209826525	7.316728875	7.207711195	7.29671925	7.256101222	7.251521894	7.31131793	7.354706206	7.399028128	7.237198202	7.265515292	7.264755377	7.322287403	7.326533216	7.290143803	7.287211422	7.271270714
ILMN_1656818	7.274586604	7.264059475	7.337685065	7.316983321	7.217357535	8.474279684	7.239000904	9.674752385	8.284140773	8.881463562	10.29572561	9.924712679	10.00110052	8.461842131	9.575403777	9.528088542	9.188259502	8.511520571	9.954170251	9.26016622	10.10020463
ILMN_1656822	11.99585239	8.257478029	9.040241341	11.70649414	7.474257953	11.95214145	7.344048854	12.69476772	12.85935252	13.1984108	12.38163946	12.98484238	12.12693036	12.54181137	12.62661732	13.00536644	12.75064914	12.61659501	12.93345653	12.36796431	11.84717666
ILMN_1656826	9.990036003	7.289502147	7.237030355	11.20915664	7.205492214	11.03572629	12.44895198	11.08124815	10.92713022	11.14916007	10.62901814	11.52316204	10.69903706	11.45303544	10.32910969	11.09830316	11.3895264	11.31093701	10.38406531	10.68832714	11.05501373
ILMN_1656837	13.61617911	13.14962603	13.00101055	13.65923283	12.55719285	13.0938985	13.41743626	12.85382567	12.74460956	13.62233178	13.32010229	13.04888492	13.55836844	13.50699549	12.82928821	12.99072801	13.0019009	12.55222038	13.30992177	12.82297903	12.45022167
ILMN_1656840	11.56506752	8.851445081	12.26136532	11.1074022	7.197653022	8.500986223	7.194235339	10.02560867	10.26827476	10.49307034	9.958017779	9.86707589	9.206064813	9.715644	9.766746531	11.11622882	9.536654516	10.51984354	9.904829039	9.367877956	8.804833742
ILMN_1656842	7.390981507	8.586050282	7.351471582	7.674712699	7.266001944	7.582486746	7.188144205	7.588036064	7.499342107	7.455155189	7.597719042	7.504074343	7.514724599	7.554228922	7.48783461	7.46097528	7.633821607	7.592667626	7.586837985	7.607962291	7.598241594
ILMN_1656846	7.784388369	12.85597129	7.587511563	11.92843006	13.90775675	7.748504188	8.522874206	9.555785409	7.514586695	7.359780109	9.729051007	7.486607232	7.476973686	7.428963171	8.59645628	7.393368711	8.378903846	7.421444137	9.276223985	8.305711275	7.508692366
ILMN_1656847	7.238241721	7.285964889	7.233883093	7.280656269	7.225815364	7.249700411	7.21372371	7.229309754	7.305296236	7.33269243	7.256451858	7.335680964	7.27605893	7.329652648	7.152399155	7.325714395	7.335855937	7.299737082	7.485936843	7.163006114	7.281692461
ILMN_1656849	7.370891545	7.293679675	7.348154398	7.266314441	7.203024932	7.298955898	7.210010033	7.386427487	7.375552992	7.30361918	7.204142439	7.257304563	7.402408349	7.258282373	7.252662014	7.227107042	7.344861261	7.334409216	7.270587113	7.618516248	7.249214572
ILMN_1656853	7.221128087	7.274223347	7.307644307	7.385828995	7.201787891	7.331885009	7.147595478	7.294901469	7.35899418	7.240085409	7.28073294	7.296460011	7.237862785	7.324662644	7.31774096	7.277914248	7.319676857	7.362598578	7.383152407	7.357532291	7.249832671
ILMN_1656863	7.256672426	7.271798829	7.35148105	7.245791154	7.186609215	7.30361587	7.212285951	7.263142649	7.34158134	7.193026449	7.292948394	7.227017923	7.294100227	7.241674719	7.345527551	7.17520987	7.292402895	7.255334307	7.287899552	7.295209089	7.213779214
ILMN_1656865	7.340585874	7.297763385	7.211187228	7.234966912	7.22203071	7.292670682	7.197387497	7.309706747	7.363465923	7.263467242	7.32705827	7.182216698	7.279180772	7.353504645	7.344775304	7.244537895	7.338247729	7.350032095	7.194715099	7.395896228	7.360152016
ILMN_1656867	7.323449702	7.591361787	7.299218309	7.581593839	7.198635374	7.411627255	7.207566073	7.298355977	7.419723981	7.379368022	7.450186626	7.338594793	7.219763853	7.453098256	7.350949402	7.382772348	7.381522586	7.40800843	7.343247256	7.297842818	7.351041075
ILMN_1656868	13.99533823	13.82134895	13.72942903	14.12591642	13.50696674	13.60869639	13.83521437	13.8350374	14.19217931	13.93232541	14.10305933	14.16136819	14.00769062	14.03886695	14.13971404	13.98800029	14.01864905	14.07831319	14.08877923	13.73639161	13.7267314
ILMN_1656869	7.32414498	7.299471755	7.351751502	7.585685551	7.682105416	7.319407616	7.911829207	7.395177645	7.421418879	7.371748241	7.415742225	7.403009908	7.447443758	7.412072978	7.416001064	7.390580923	7.374172678	7.366577174	7.389302847	7.403968353	7.41023632
ILMN_1656871	7.424708067	7.295318062	7.368403186	7.287312508	7.250245749	7.351966129	7.208698672	7.260445241	7.411355587	7.510465146	7.391001998	7.249911758	7.37141481	7.445887966	7.316968671	7.376426679	7.348895615	7.305773635	7.387756229	7.448811416	7.291741108
ILMN_1656879	7.679920713	7.293277617	7.324595157	7.289879382	7.211878256	7.388522205	7.210657947	7.440572002	7.426912307	7.404572274	7.38991245	7.476789182	7.404069033	7.491689055	7.415430324	7.396037185	7.487257259	7.428595379	7.485568408	7.385116977	7.461569286
ILMN_1656882	7.269637059	7.300992887	7.262177467	7.609890661	7.214055189	7.344554805	7.203754496	7.312482983	7.350320564	7.337996787	7.315385857	7.351640279	7.335885667	7.393420992	7.341857587	7.323430398	7.296631689	7.256681656	7.298861106	7.354071212	7.249589844
ILMN_1656883	7.659322757	7.384028204	7.484421905	7.681539948	7.323599797	7.406843436	7.21138801	7.615478301	7.622442556	7.481128822	7.460972937	7.48778263	7.430521867	7.420331529	7.473763697	7.416063044	7.512523478	7.530486898	7.427651741	7.481550719	7.470163614
ILMN_1656886	11.75166406	7.261298699	12.35298317	7.34055063	7.22330766	11.49774569	7.208149823	11.84640855	11.46702193	12.46267706	11.74988696	12.19627099	11.78882163	11.94598828	12.49596099	12.66125396	12.15177147	11.99191617	12.67106308	12.05912117	11.93107429
ILMN_1656898	7.270627701	7.241341593	7.30886492	7.285782525	7.218472583	7.304549997	7.21422592	7.244413517	7.212649751	7.267202413	7.386953514	7.328258677	7.279886814	7.37004531	7.265600597	7.286990667	7.368096578	7.264860128	7.249130982	7.195208466	7.244211533
ILMN_1656900	10.84867931	11.51190644	11.82796343	10.38326534	11.66820602	8.491131672	11.92742746	8.615371098	8.370252981	8.740096321	8.48316132	8.874831271	8.61509311	8.747205948	8.626195469	8.720381887	8.281140659	8.49321673	8.478902877	8.232665748	8.245765048
ILMN_1656902	13.77262925	12.91409018	13.12756914	13.24545962	7.221651451	14.34383771	7.178233781	14.12396674	13.98058373	13.97065981	14.01202479	13.93527685	14.19809525	13.59313425	13.8271602	13.65750815	14.05491321	14.09670493	13.97138654	14.44577663	14.15360347
ILMN_1656904	11.93817646	12.26780603	12.57655879	12.19716712	13.29090462	10.3760119	12.85735042	9.00452838	9.995721559	11.27964854	11.38301367	11.01359754	10.34046753	10.34484285	10.75452768	10.69485383	9.628615998	9.692231864	10.33266867	9.049415934	9.666941629
ILMN_1656907	7.3156588	7.293743944	7.337524722	7.27095867	7.228345383	7.280229307	7.213483547	7.381684525	7.366240513	7.349471833	7.372270901	7.387749815	7.344242386	7.295720638	7.349624513	7.285457059	7.344487666	7.253696703	7.368151497	7.362839439	7.352131225
ILMN_1656909	7.256305615	7.304350299	7.294211699	7.371165301	7.763482326	7.387055387	7.213247715	7.434460001	7.405847854	7.421497555	7.368614559	7.370373888	7.344589198	7.408015128	7.335212068	7.433135544	7.363240802	7.287519154	7.236333874	7.367122453	7.424160226
ILMN_1656910	7.218151139	7.256498978	7.086549555	7.225835864	7.16980729	11.47042408	7.195988757	12.37248528	12.50869265	10.93042895	11.27713298	12.52793631	12.27163159	11.66347454	11.72401619	11.49173629	13.38304014	13.43183891	12.77076395	12.11597045	12.7177713
ILMN_1656913	12.02502797	11.63959738	12.21310043	12.04363681	10.68353136	13.10120549	11.46584351	12.29901636	11.3256964	11.45268412	12.01882268	11.29951674	12.24368277	11.82340039	12.00879857	10.86435845	12.39199732	11.90742557	12.11186743	12.93297787	12.93157772
ILMN_1656915	11.73574108	9.427175993	12.11570016	11.95145049	7.919935535	10.27060336	7.614475372	12.17170788	11.83992865	12.37970506	11.76975367	11.92349761	11.73209135	11.96010184	11.81089334	12.53117252	11.85608131	11.23672257	12.01237253	10.83058247	10.79409215
ILMN_1656920	11.2947685	11.65594332	7.568929127	11.66235126	7.334900194	12.64651437	9.69821097	10.22956243	9.874449254	10.30282872	10.77199505	10.73888321	11.81035496	10.36694526	10.19154451	10.76915919	10.74798995	10.63402652	10.21509827	11.09422873	11.98662311
ILMN_1656921	7.33762865	7.291989837	7.33367648	7.241330946	7.215967537	7.511834776	7.21096214	7.610219341	7.682072766	7.438599676	7.33849689	7.521529161	7.663738516	7.685439092	7.498609671	7.581171829	7.561397586	7.485230542	7.4610261	7.599502191	7.616237067
ILMN_1656925	7.951840913	7.575520775	8.223777133	7.881006671	7.828161768	7.57876262	9.138032216	7.606769787	7.629939124	7.577860776	7.471101605	7.518998937	7.539784908	7.582620194	7.571641857	7.55588708	7.516945027	7.59939417	7.492485042	7.564065228	7.562878704
ILMN_1656927	7.278813365	7.280328873	7.228576124	7.307657397	7.225812923	7.317222237	7.202035422	7.349031112	7.3290337	7.334195543	7.344857045	7.393139314	7.311236177	7.287793892	7.470396367	7.288841024	7.199820055	7.227128965	7.418899431	7.373365231	7.288926503
ILMN_1656933	7.261836778	7.286029811	7.341695239	7.397050914	7.220909608	7.379468236	7.20203996	7.351054452	7.309616938	7.256774745	7.361162998	7.388366015	7.375073443	7.342975458	7.353481176	7.415520965	7.310836197	7.29145676	7.338900569	7.319443519	7.357009842
ILMN_1656934	7.222593816	7.192800445	7.038647494	7.220901962	7.197219966	11.24686506	7.198203675	11.28948648	12.36315577	11.61225425	12.24970329	10.79608135	11.86379117	12.68902516	11.5979498	10.41369948	12.3408331	10.5244791	11.36107442	12.00684083	11.76661713
ILMN_1656938	12.09093244	12.51947792	7.336361852	12.16916832	7.295847795	12.08528607	7.299369247	13.12102697	12.20819296	12.82716314	13.3687477	13.06701071	12.78680451	12.78817943	12.28866256	12.52902118	13.04507804	11.6814591	12.46606622	12.72957785	12.5077122
ILMN_1656939	7.395305369	11.52766288	7.345704015	7.247820324	8.562115651	7.429787986	7.199560031	7.456321915	7.33290745	7.787785579	7.535944993	7.273015298	7.288276813	7.616480705	7.517466026	7.439245492	7.462554727	7.484313998	7.559560539	7.38684051	7.509594806
ILMN_1656940	10.27123483	8.266398419	8.86529715	9.610335637	9.341516832	8.961335012	8.182272225	8.869557185	8.772959986	9.050305463	9.047922246	9.197311108	8.49224813	8.704769558	9.065897261	8.472093038	8.821368238	8.871076041	8.879951964	8.664113212	9.127193388
ILMN_1656942	10.60440414	7.294386982	7.322902228	9.408458597	7.220110718	8.315667899	7.22347466	9.307074022	8.957560821	8.393809044	8.901765746	9.355178082	8.178827658	8.165503315	8.575145819	9.067594962	8.681677149	9.066912751	9.051382319	8.228602478	8.118768489
ILMN_1656949	7.242632128	7.267885496	7.300710808	7.28434098	7.816573167	7.284635464	7.226977168	7.278321982	7.256714468	7.281593415	7.361974379	7.331273886	7.349143471	7.329717196	7.31681027	7.38602371	7.317003189	7.30017957	7.373472504	7.281417583	7.23271222
ILMN_1656951	11.67615925	12.16123712	7.513394796	11.98911661	8.247592891	11.59621254	8.811146937	11.22341975	12.17288011	13.35627947	13.44384011	11.72480334	12.9054355	12.45327402	12.99347784	13.20499967	12.78016878	12.24123755	13.38088639	12.5271582	12.43568262
ILMN_1656955	12.70446351	13.82355729	13.22316651	12.92250173	14.01656614	10.50003159	13.93902217	10.50800082	9.662309455	8.0506008	9.892227953	9.887927427	10.47845602	10.4358622	9.179417396	10.23128859	9.222088879	9.516967801	9.892742001	9.863018139	9.222119166
ILMN_1656962	8.578640965	10.7236895	10.17562179	9.080462692	11.25839821	7.803767374	11.37318322	7.905760136	8.026140688	7.875125737	7.841375073	7.724392032	7.774378456	7.819383182	7.8211795	7.777407219	7.82998974	7.875277567	7.716796059	7.82640684	7.846996516
ILMN_1656963	7.221931008	7.272999651	7.293943065	7.278394876	7.22193472	7.255941432	7.208925916	7.311444456	7.271144255	7.298648664	7.285734939	7.242952636	7.346400754	7.260595748	7.324667745	7.303430583	7.295717457	7.230166565	7.336658765	7.177654271	7.29513483
ILMN_1656977	7.218139721	7.276259238	7.350599177	7.311233531	7.356677237	11.56175045	7.190987095	10.51498068	11.68235122	10.86847582	10.47057341	10.81036084	11.26135562	11.42284235	11.08191195	9.171957666	11.35064274	11.81454802	10.47985044	11.66205742	11.81554284
ILMN_1656979	14.59839891	13.9600724	14.34791019	14.3690681	13.54013854	13.35543663	14.28967621	14.06288312	14.53332865	14.17431776	13.02849767	13.95337946	13.83661472	14.36084502	14.72978324	14.13874766	13.79281921	14.2292686	13.84090517	14.47313396	13.78242164
ILMN_1656981	7.775391173	7.836982569	7.425761235	8.63836421	9.128461806	7.532422886	7.218346785	7.633523777	7.515708492	7.698696645	7.46558733	7.552418211	7.522050715	7.586478633	7.666852571	7.56622467	7.587159845	7.523729734	7.551907339	7.521094776	7.480238909
ILMN_1656988	7.204264546	7.267056246	7.288083587	7.249667156	7.185331459	7.273109685	7.564935376	7.222316509	7.206313708	7.221023633	7.26645656	7.265901887	7.265173559	7.28888237	7.22258077	7.262220028	7.251482393	7.217154286	7.324972742	7.231193497	7.27676274
ILMN_1656992	8.077986336	8.148048488	8.515516755	8.000375633	11.7257035	7.643225243	10.33509838	7.670145368	7.642089292	7.667178931	7.567900098	7.580664448	7.532304722	7.553727451	7.491099341	7.531388083	7.603593568	7.562936665	7.66695561	7.56751108	7.545811328
ILMN_1656993	9.508250634	7.466901505	10.15475428	8.066561487	7.224510031	7.896365775	8.878060314	8.285400842	8.04727219	7.749688943	7.839962798	8.019919806	7.970917016	8.124878573	7.882340036	8.053519371	7.801504887	7.974478856	7.715984631	7.848315802	7.858849257
ILMN_1656998	7.314787135	7.293159912	7.314199008	7.313970932	7.201948032	7.451145421	7.196343294	7.435840309	7.384124617	7.357003883	7.357188065	7.427615982	7.49083184	7.394994835	7.429687223	7.465667884	7.281321429	7.443099111	7.394774285	7.456890493	7.350915355
ILMN_1657002	8.108811651	7.295779471	7.354413258	8.726747639	7.282638476	7.612514563	9.074836725	7.837639824	7.60473981	7.490850627	7.62150639	7.517562948	7.588998572	7.613544623	7.54847211	7.5152929	7.573097041	7.671353635	7.548216724	7.737294694	7.635007805
ILMN_1657009	11.50653069	7.523706051	7.363295139	11.39390965	7.381781623	10.62329784	7.356411204	9.610477659	10.27161244	10.24771555	10.84958461	10.12806103	10.33869998	10.25821187	10.63802145	10.40674102	10.67015038	10.45076713	10.41125984	10.41537763	10.27725358
ILMN_1657010	7.265653211	7.295328124	7.350918756	7.258751635	7.224492956	7.187128521	7.177700039	7.297423458	7.298398334	7.335733758	7.284405755	7.355212651	7.386843529	7.369829881	7.220381086	7.341775802	7.272765125	7.271916554	7.279011197	7.323717151	7.277572586
ILMN_1657011	7.964634105	8.223934327	7.463382604	7.282465435	7.32429951	7.829407992	7.919861498	7.814241652	7.809740653	7.687531029	7.594327034	7.605319214	7.640659273	7.776471053	7.705417082	7.661956624	7.666866291	7.725933669	7.673919259	7.660507449	7.715351674
ILMN_1657022	8.567632512	7.294438154	7.651485187	7.851993051	7.225539919	7.840649954	7.423019656	7.666389573	7.71643818	7.67457731	7.630410235	7.670326349	7.646765189	7.555168655	7.618584615	7.700785666	7.641349635	7.640797645	7.748317218	7.719409427	7.713867124
ILMN_1657033	7.250954452	7.290837311	7.342645683	7.441596029	7.571554492	7.33712708	7.224099423	7.347185162	7.41888322	7.404989411	7.319282577	7.439095495	7.413427639	7.430822185	7.381434059	7.420134026	7.289291013	7.349953735	7.329432426	7.346517391	7.375007312
ILMN_1657039	11.35861327	7.301570076	7.463662736	7.690583625	12.43933438	10.19279132	12.43832877	10.4612551	9.99444698	10.17994558	9.98506163	10.34925557	10.02940312	10.48710664	10.29285671	9.848207479	9.879752421	9.810570793	9.959147556	9.894885071	10.5537235
ILMN_1657041	8.284387285	8.455922645	9.298058708	7.968139267	10.56372732	7.680863865	11.33153655	7.857073958	7.711938264	7.763721099	7.68097841	7.575430197	7.680995058	7.651452777	7.734020674	7.728629065	7.597811282	7.69992866	7.566888946	7.658282138	7.636675974
ILMN_1657044	7.436954279	7.292906333	7.370967571	7.530707631	7.22818347	7.336468343	7.200659517	7.435043056	7.526640425	7.370202517	7.475610824	7.477747851	7.430890914	7.619343735	7.495196983	7.456372546	7.402184251	7.517405029	7.345019805	7.429198335	7.429809247
ILMN_1657045	13.04672646	13.13812103	13.09667229	13.03508489	13.39551634	11.98357388	13.43915362	12.71391067	12.68843792	13.16332635	12.6549756	12.91050441	12.6905117	12.82408464	12.43589919	13.2996138	12.52701313	12.3123509	12.69103489	12.44903393	12.42843237
ILMN_1657050	11.30886783	9.612566849	7.354918111	8.185698549	7.219234674	9.6486135	7.208013107	9.447510118	9.906479813	9.073452556	8.955817484	9.799395159	9.474431298	10.42188561	9.55562118	11.05485474	9.838979344	9.711234365	9.57391945	9.856082206	9.455833205
ILMN_1657056	7.228334775	7.598777401	7.358971416	7.308094558	7.241819729	7.315765708	7.214547574	7.353000189	7.350633457	7.543133656	7.299925731	7.408997785	7.310696546	7.379540793	7.436708326	7.40777138	7.419467663	7.465322165	7.379448222	7.418661047	7.365522759
ILMN_1657058	7.230898253	7.330774163	7.351249172	7.334039948	7.2255557	10.61320465	7.252543763	11.75990028	11.74792586	11.77339322	12.13942262	12.180785	11.92938173	12.36415726	12.08000002	12.48635801	11.60117307	12.05439969	12.42510029	11.84667377	11.44136969
ILMN_1657064	10.5952607	7.266671176	7.274600691	7.447733512	7.203108479	9.396536101	7.196643701	8.908546614	8.796717245	7.50190072	8.496352924	8.35133483	8.394666436	9.463661732	8.48719778	7.584991072	9.16090309	7.766008858	8.753816341	9.00721206	8.995694681
ILMN_1657074	7.362800106	7.300799784	7.280264901	7.236596678	7.220411891	7.322078362	7.218598553	7.284184317	7.257737855	7.295863247	7.344268959	7.172558357	7.232415742	7.349458225	7.27339289	7.303269439	7.219796708	7.288733355	7.305754626	7.220897601	7.381349862
ILMN_1657077	10.54609951	11.51367169	11.87635219	11.52936322	7.228602694	9.132043241	7.232926926	9.739835648	9.803511574	10.01559413	9.689906838	9.853376407	9.541689275	10.01184372	9.241655493	9.779968978	9.520644137	9.556994677	9.63287454	9.533867685	9.330908467
ILMN_1657079	7.600464351	7.509363918	7.328570506	7.374561931	7.221581479	8.537256052	7.205123647	8.284370662	8.465006523	7.620335383	8.228366367	8.263198638	8.624064841	8.554797671	8.469500899	8.76102528	8.156657692	8.519058345	8.24196844	8.51909662	8.460656964
ILMN_1657086	8.01563654	7.307763955	7.672184401	7.761427385	7.503234515	7.455269084	10.25736022	7.609069333	7.492211052	7.590564394	7.510841556	7.551200389	7.5805962	7.324039439	7.474302049	7.626715945	7.521499399	7.381788306	7.465939529	7.457385345	7.467376554
ILMN_1657087	7.26098546	7.295819664	7.320242606	7.258651321	7.216931483	7.306492718	7.19714695	7.510488751	7.397347405	7.487356382	7.426680911	7.563585318	7.378863715	7.523797494	7.451992743	7.479387763	7.355696761	7.581947041	7.474948389	7.318230357	7.323871373
ILMN_1657095	9.305296869	11.68532171	11.34618428	10.68970693	12.01677188	9.336782399	12.18045072	7.979303696	7.811972554	7.79620113	7.875113566	7.70754862	8.062202754	7.77375215	7.786889143	7.761457793	7.872795831	7.811354501	7.884396618	8.169440146	8.184385583
ILMN_1657096	7.579724931	8.860066561	8.388147146	8.712048961	7.45803696	7.60238916	7.204381143	7.651372109	7.686754288	7.777836199	7.568998135	7.713558582	7.59620908	7.735980784	7.59098517	7.544856077	7.681294804	7.58206969	7.56431648	7.547883777	7.560207004
ILMN_1657111	7.763737206	10.5123445	7.729497899	7.841894194	11.38281631	7.467887522	9.603280085	7.560566058	7.49753306	7.603594633	7.442542474	7.610002784	7.463942677	7.595419722	7.533697601	7.629167115	7.457083407	7.448317537	7.481062692	7.479866426	7.410232016
ILMN_1657125	7.216127394	7.281628027	7.240562164	7.228479516	7.18551538	7.228429595	7.18808735	7.30206068	7.364349702	7.279005606	7.317914368	7.443210862	7.219452433	7.242312052	7.304402058	7.406294385	7.290875201	7.287876631	7.342643428	7.266427488	7.242055659
ILMN_1657129	7.359682778	7.310138167	7.344517655	7.410298621	7.41335259	7.324061159	7.213385005	7.339551133	7.345572499	7.345584266	7.371142896	7.328346045	7.282423134	7.321728382	7.341899952	7.36441569	7.323674298	7.343332353	7.322302563	7.282970606	7.294922913
ILMN_1657139	11.6062574	7.283987757	7.410752135	11.90213829	7.325704835	12.36320682	7.227108122	13.21564612	13.1251842	13.11061508	12.95028119	13.06301311	12.73607737	12.76455956	13.22751573	13.21324124	12.78723347	12.88939749	13.09425311	12.4421669	12.7321034
ILMN_1657141	7.203628727	7.284600458	7.208560948	7.224222321	7.179410331	7.256720295	7.190811814	7.257906001	7.245995474	7.180644644	7.150364358	7.157104478	7.228558116	7.215990607	7.200490751	7.259703008	7.209545733	7.187516968	7.1547407	7.168936465	7.165301829
ILMN_1657144	11.840891	12.70199718	13.24492255	11.81221997	9.440808442	11.24290684	9.254264738	11.26644437	11.22334287	11.40463116	10.90209101	10.72976977	11.076032	11.96776399	10.73786096	11.07140067	11.29452134	11.34590827	10.34867711	11.03239593	10.03020355
ILMN_1657145	7.825314341	7.448518247	7.464408356	7.574204002	9.098727866	8.37051778	8.175907255	8.279213999	7.422510695	7.399521406	7.892562062	7.508753646	9.349777618	9.341638879	7.576785141	7.5051638	7.916803105	7.88865224	7.661440887	8.373582335	7.889585064
ILMN_1657147	7.21105736	11.50794135	7.322860967	7.510261098	8.654485417	7.444770012	7.181366023	7.687577843	7.42785414	7.403071011	7.456503568	7.53385226	7.469346936	7.422273457	7.458942157	7.626660677	7.448178799	7.594748751	7.553325387	7.384213542	7.490981364
ILMN_1657148	13.21577355	14.07538074	13.25609781	13.32006798	14.34692021	11.56147701	14.33561488	11.17206069	10.58492357	10.24105586	10.52948055	9.249059039	9.553978556	10.8265974	9.994869109	10.60381983	10.24795792	10.58027828	10.39085565	10.99211016	10.18749784
ILMN_1657149	10.369066	7.22314682	7.21440303	7.2692893	7.1382316	8.879309454	7.200886855	8.459858524	9.661963349	8.456159783	8.717688578	10.4044408	8.717788577	10.86678688	9.525987691	8.999968424	10.20674961	10.51615303	9.056874911	9.601363332	10.21133283
ILMN_1657153	7.956140078	7.2882812	7.294136074	7.789185443	11.71021407	10.63546187	7.216386189	10.37165507	10.55648641	9.619028435	9.965479097	10.13591705	10.06229603	10.24605347	10.82744189	10.60500072	10.69649457	10.5220489	11.22346753	11.13002512	11.27696663
ILMN_1657157	7.838886891	8.610846132	7.821608646	8.214877286	7.720441446	7.471998764	7.249886084	7.487939855	7.590655568	7.423251438	7.501865268	7.616154765	7.586879845	7.555478658	7.43188093	7.584973178	7.547774098	7.523694549	7.588586196	7.407543061	7.439410521
ILMN_1657158	7.660574249	7.70333953	7.353791243	7.571009147	7.221857574	12.11376282	7.772912254	12.90484966	13.08855482	13.17769772	12.78629412	12.6875304	12.94234442	13.11075581	12.83060916	13.18238267	12.87979626	12.80614786	12.90567301	12.79792053	12.67478271
ILMN_1657163	7.788709313	7.294151205	7.661345881	7.543288885	7.555039584	7.529712199	7.262540371	7.539380433	7.597051644	7.593778504	7.550856262	7.627153724	7.610553063	7.563201505	7.566515264	7.668676486	7.516114027	7.518518997	7.638791297	7.606361712	7.612303891
ILMN_1657191	10.77649226	8.119051082	7.344883897	8.146908338	12.89523983	7.394223807	7.43434493	7.393752085	7.432288665	7.405599586	7.437160344	7.457700593	7.371768407	7.482911099	7.484645108	7.448317114	7.539409393	7.375180002	7.422884961	7.417488803	7.416309228
ILMN_1657194	10.87577465	12.03707485	11.94890265	11.79402405	12.22690825	9.296653419	7.213124149	8.499723185	9.021336419	8.50597523	8.357126967	9.214895853	8.684288557	8.542754196	8.409876952	9.310316752	8.699749158	8.963528545	8.813293882	8.355030127	8.33235137
ILMN_1657199	7.256280311	7.314909239	7.343856756	7.33944289	7.224736202	7.30173936	7.213360181	7.30837029	7.342089162	7.312340771	7.288286732	7.363108084	7.308848111	7.312108847	7.345295713	7.31476615	7.301904906	7.337377948	7.358935772	7.327418384	7.206593198
ILMN_1657204	12.22535987	7.288856541	7.205944308	7.21423445	7.221111074	14.50009194	7.213950794	13.26587679	13.24222938	12.84892046	13.59014007	13.15318133	13.9100416	13.14053661	13.21098117	13.32639053	13.45781643	12.8418351	13.5726474	13.91689077	14.26844586
ILMN_1657210	7.48657626	7.578517344	7.391551078	7.391139332	7.232328749	7.375874753	7.613777896	7.372807265	7.408986397	7.442625956	7.387207973	7.400572481	7.397489285	7.276647413	7.456374746	7.417036809	7.365071224	7.360665732	7.40401585	7.436895164	7.37140498
ILMN_1657222	7.416533112	7.295515769	7.276057672	7.310733179	7.746303858	7.28387272	7.209454541	7.354668509	7.308399254	7.328091122	7.348159195	7.362485629	7.242775811	7.348978553	7.316087043	7.379684575	7.328417054	7.363978391	7.336817282	7.330954862	7.337495526
ILMN_1657230	7.261490617	7.28606621	7.311180724	7.256991181	7.217143501	7.330796887	7.206534237	7.380039424	7.409931088	7.368588577	7.335703894	7.511640178	7.381741926	7.429048846	7.440035346	7.385419696	7.464750648	7.43828999	7.393307317	7.361663203	7.458166781
ILMN_1657234	7.265128471	7.321897854	7.351581172	7.536013929	7.215651102	8.096162306	7.199141113	8.847562937	7.437343226	9.166127371	8.031977399	8.157480266	7.689681964	7.430095359	7.758254103	9.520230918	8.22931588	7.508425227	7.433596096	8.169688382	7.527421484
ILMN_1657235	7.205541677	7.291667059	7.137350754	7.23956344	7.23517253	7.2545677	7.188710694	7.35203051	7.301558817	7.38890255	7.283735901	7.329634487	7.38635366	7.26143234	7.241115051	7.288100479	7.259799468	7.306189451	7.291481721	7.280004417	7.32600473
ILMN_1657237	12.34996008	7.262876918	7.271896658	11.90605857	7.335622066	11.03468654	7.194331519	12.84261412	12.90264409	12.77485371	12.57655994	12.59272502	12.28079531	12.70642953	12.63387963	12.91633568	12.87315466	12.37539294	13.01419453	11.68089459	11.66316566
ILMN_1657238	7.276119572	7.291114356	7.336972788	7.27022327	7.197828258	7.290583245	7.211776232	7.280204368	7.295442968	7.275287351	7.368317407	7.238694085	7.22983068	7.383835013	7.271440465	7.274390567	7.275709751	7.263768444	7.317997966	7.31645932	7.301172765
ILMN_1657247	7.690236213	10.01275555	8.922535632	7.620156842	11.37020457	7.665507069	11.79237703	7.671772431	7.591038584	7.613623718	7.538787491	7.553759642	7.61657092	7.680754465	7.555883027	7.50889423	7.605241118	7.538234195	7.529961679	7.545247405	7.58753567
ILMN_1657248	8.100409199	8.178146226	9.401627635	8.033923219	9.355805405	7.821019998	7.394643117	7.724055071	7.660289882	7.60383981	7.518130978	7.593984423	7.591054137	7.594055979	7.729022724	7.8081056	7.59575781	7.616526857	7.719238737	7.56358623	7.565949248
ILMN_1657249	7.457215314	7.265572178	7.29175034	7.218889658	7.226158203	7.344436666	7.19819297	7.456983279	7.247955149	7.263922224	7.417324269	7.380775306	7.306390214	7.324567469	7.360784452	7.505323472	7.410749184	7.40181195	7.388710189	7.44098432	7.350713993
ILMN_1657254	7.262390877	7.260029592	7.322599374	7.300711256	7.176083344	9.251289933	7.172457739	8.852133777	8.837685228	7.278453289	7.678399158	9.116979544	8.170705756	7.256458372	7.261874584	7.25493749	8.675383293	8.444038168	9.359452354	7.97495813	9.164577956
ILMN_1657266	7.328380687	7.571827638	7.259717471	7.39805883	7.210909521	7.287029451	7.200418016	7.348935752	7.2673412	7.277347322	7.277981711	7.350640133	7.2094744	7.324022523	7.349469803	7.440133269	7.27843171	7.268647984	7.227113105	7.293387624	7.350939297
ILMN_1657273	7.692882768	8.621970842	8.169437269	7.661659518	9.380648275	7.465806806	7.538650139	7.507453205	7.469326247	7.493158296	7.448590293	7.449175468	7.32660869	7.473190535	7.493702578	7.488477155	7.427999126	7.405450806	7.398636901	7.451946985	7.400148877
ILMN_1657274	7.213836348	7.26822719	7.359255622	7.244997074	7.236204158	7.275340974	7.200888403	7.348062241	7.33558033	7.333176787	7.212161916	7.23113529	7.203457283	7.260650637	7.222536372	7.243076775	7.239458076	7.248198483	7.262428346	7.260901743	7.216648039
ILMN_1657278	9.775802752	11.4138335	11.50472249	10.11315653	9.103355062	8.388261759	11.78979123	8.317196914	8.289331703	8.409862663	8.24284639	8.051347062	8.213166166	8.072423897	8.153997055	8.174484805	8.164115939	8.290745603	8.077744103	8.163556499	8.069020588
ILMN_1657279	7.237289687	7.26686683	7.334344506	7.533244168	7.223608048	7.330991383	7.275778485	7.33039217	7.358418724	7.196973695	7.223031446	7.360128488	7.279960552	7.404888913	7.279442427	7.221976746	7.311368948	7.323671874	7.264514368	7.305787384	7.326020391
ILMN_1657283	14.56163403	13.43844901	14.06676404	14.37215123	7.226965809	14.63153315	13.30725784	15.14404287	15.08652873	14.90747639	14.8993398	15.05001759	14.78741118	15.00243942	14.79062053	14.93458895	14.90473155	15.06303852	14.86128705	14.63331666	14.66290286
ILMN_1657285	7.250160462	9.214281098	7.316704366	7.294268116	7.213889905	7.519208836	7.208378714	7.37553142	7.339301375	7.360282479	7.206134412	7.197336841	7.265989808	7.30636812	7.402094617	7.317724566	7.28267414	7.297438662	7.448414632	7.259747101	7.434748137
ILMN_1657286	7.256436881	7.296314604	7.423782991	7.349837922	7.473313652	7.274951312	7.353478184	7.344157897	7.310503859	7.28853125	7.392859189	7.282568685	7.285936288	7.250880686	7.270245141	7.311709195	7.325096297	7.271234025	7.329889065	7.293032189	7.300050638
ILMN_1657288	8.745394876	7.5033522	7.49942701	7.483367343	7.357510075	10.59064836	7.218279127	10.18237844	9.956022539	10.78875097	9.189701551	10.43656239	9.927064099	9.57198424	9.696127373	8.54051648	9.634444187	8.774053835	10.08025227	9.743717609	9.877196907
ILMN_1657295	11.10724255	7.337680402	7.339999354	7.234767041	7.18614424	7.326269443	7.208720794	7.279753959	7.304306723	7.27661955	7.828967845	7.300371076	7.216245562	7.402543719	7.274290207	9.175918156	7.283803595	7.31710263	8.373374163	7.824802914	7.786084031
ILMN_1657302	11.50219225	8.348262845	7.408480191	11.78023443	7.970945749	11.30142609	7.603704848	7.397864464	10.23098896	10.06690252	10.49059334	8.829541609	10.51454666	10.64889311	10.29545286	9.681770747	11.57046221	10.65933154	10.69111974	10.76128132	10.51719938
ILMN_1657312	7.237991712	7.292488769	7.076349704	7.214688359	7.21666677	7.227640386	7.192835849	7.302143052	7.29651037	7.214523737	7.261371234	7.204777172	7.227883142	7.269348388	7.280795167	7.251746348	7.231611977	7.175006861	7.143948182	7.208404582	7.164902978
ILMN_1657316	7.205889198	7.277993057	7.346606605	7.284448511	7.211650491	7.467244425	7.206331517	9.568310489	7.350087438	7.232680856	7.295894783	9.804740508	7.346251819	7.291884302	8.515250977	9.040213943	8.281104793	7.38085631	8.392793794	7.292360571	7.841199617
ILMN_1657317	11.3249181	8.030640634	7.35232297	7.372589412	7.224917589	10.37066087	7.21514184	10.65440282	7.452992156	9.698561615	10.24362839	9.742176382	10.11084369	10.41224033	10.35950433	7.257553303	9.239528793	8.744203468	10.2056475	9.859704958	9.456841642
ILMN_1657332	13.90898002	14.22949032	14.15380832	14.20498733	14.23633026	12.0052064	14.15539921	13.35253779	13.06022205	13.22889774	13.22625827	13.41044297	13.18078066	13.45377741	13.10366893	13.20607373	12.93539822	13.08891974	13.10071864	12.70104139	12.18504655
ILMN_1657340	7.519110799	7.293566424	7.332078541	7.400080539	7.188103544	7.432333391	7.199372318	7.465088995	7.409510972	7.432584347	7.378641631	7.347926264	7.312949989	7.378642106	7.40377743	7.391013623	7.479171099	7.433628895	7.345904872	7.460978111	7.399118559
ILMN_1657344	7.469535541	8.047518343	7.3346842	7.426700823	7.207158336	9.85072416	7.212106882	10.68354597	11.95294844	11.59757295	10.99700681	11.80539648	11.54842595	11.39584035	12.35358157	13.09276729	12.0173729	11.75641483	11.82519866	11.78809321	11.71590486
ILMN_1657347	12.32021716	13.25202061	13.1315698	12.30900866	7.217003418	13.07562625	7.403387677	12.04994706	12.08218444	12.35318922	12.35669252	11.5774379	11.92169208	12.49915505	12.13589157	11.84670885	11.84045104	11.88337273	12.90810778	11.59232396	11.18241282
ILMN_1657348	7.286873208	7.294965965	7.304981905	7.228277891	7.217373656	7.196459247	7.18682392	7.256557276	7.214960124	7.27046663	7.231981796	7.243953106	7.243054737	7.308552515	7.334652045	7.30455599	7.211968961	7.277265257	7.279791555	7.212217328	7.242341605
ILMN_1657349	7.742891866	7.300700621	10.85617035	7.363585021	7.419346533	7.342730431	7.189914353	7.442303532	7.488121268	7.308162824	7.307686975	7.456033119	7.284710841	7.189136467	7.260328989	7.303491717	7.434588253	7.24274274	7.293099474	7.306796895	7.413731825
[truncated: 45,872 more rows]
