# Supplementary material for: Potential Small Molecules for Therapy of Lupus Nephritis Based on Genetic Effect and Immune Infiltration
Source: Biomed Res Int. 2022 Apr 23;2022:2259164. doi: 10.1155/2022/2259164 (PMC9056222; doi:10.1155/2022/2259164)
Supplement: Supplementary Materials — Supplementary Table1: the expression data of GSE32591, which contains 32 glomeruli and tubulointerstitum tissues of LN patients and 14 glomeruli tissues and 15 tubulointerstitum tissues of healthy controls. Supplementary Table2: the expression data of GSE112943 consists of formalin fixed paraffin-embedded kidneys (14 lupus nephritis and 7 control kidney). Supplementary Table3: the data of the relationships between Nine chemicals, 23 hub genes and lupus nephritis. Supplementary Table4: the degree of 23 hub genes in the network between small molecules and genes and the description and function of 23 hub genes. Supplementary Table5: all the data of small molecules based on the 23 hub genes from the DSigDB database. Supplementary Table6: the relationship of nine potential small molecules and 7 common effective drugs for LN were found in the DREIMT database. [file 2259164.f1.zip › Supplementary Table3.txt]

Chemical Name	Chemical ID	CAS RN	Gene Symbol	Gene ID	Interaction	Interaction Actions	Reference Count	Organism Count
Azathioprine	D001379	446-86-6	IFI6	2537	Azathioprine results in decreased expression of IFI6 mRNA	decreases^expression	1	1
Azathioprine	D001379	446-86-6	IFI44	10561	Azathioprine results in decreased expression of IFI44 mRNA	decreases^expression	1	1
Azathioprine	D001379	446-86-6	IFI44L	10964	Azathioprine results in decreased expression of IFI44L mRNA	decreases^expression	1	1
Azathioprine	D001379	446-86-6	MX1	4599	Azathioprine results in decreased expression of MX1 mRNA	decreases^expression	1	1
Azathioprine	D001379	446-86-6	IFIT3	3437	Azathioprine results in decreased expression of IFIT3 mRNA	decreases^expression	1	1
Azathioprine	D001379	446-86-6	IFI27	3429	Azathioprine results in decreased expression of IFI27 mRNA	decreases^expression	1	1
Azathioprine	D001379	446-86-6	DDX58	23586	Azathioprine results in decreased expression of DDX58 mRNA	decreases^expression	1	1
Azathioprine	D001379	446-86-6	IFIH1	64135	Azathioprine results in decreased expression of IFIH1 mRNA	decreases^expression	2	1
Azathioprine	D001379	446-86-6	OAS1	4938	Azathioprine results in decreased expression of OAS1 mRNA	decreases^expression	1	1
Azathioprine	D001379	446-86-6	HERC6	55008	Azathioprine results in decreased expression of HERC6 mRNA	decreases^expression	1	1
Azathioprine	D001379	446-86-6	RSAD2	91543	Azathioprine results in decreased expression of RSAD2 mRNA	decreases^expression	1	1
Cyclophosphamide	D003520	50-18-0	XAF1	54739	Cyclophosphamide metabolite results in decreased expression of XAF1 mRNA	decreases^expression	1	1
Cyclophosphamide	D003520	50-18-0	IFIT2	3433	Cyclophosphamide results in increased expression of IFIT2 mRNA	increases^expression	1	1
Cyclophosphamide	D003520	50-18-0	MX2	4600	Cyclophosphamide results in decreased expression of MX2 mRNA	decreases^expression	1	1
Dexamethasone	D003907	1950/2/2	IFI6	2537	Dexamethasone results in increased expression of IFI6 mRNA	increases^expression	1	1
Dexamethasone	D003907	1950/2/2	IFIT2	3433	[INS protein co-treated with Dexamethasone co-treated with 1-Methyl-3-isobutylxanthine co-treated with Indomethacin] results in decreased expression of IFIT2 mRNA	affects^cotreatment|decreases^expression	1	1
Dexamethasone	D003907	1950/2/2	IFI27	3429	[INS protein co-treated with Dexamethasone co-treated with 1-Methyl-3-isobutylxanthine co-treated with Indomethacin] results in decreased expression of IFI27 mRNA	affects^cotreatment|decreases^expression	1	1
Dexamethasone	D003907	1950/2/2	IFITM1	8519	[INS protein co-treated with Dexamethasone co-treated with 1-Methyl-3-isobutylxanthine co-treated with Indomethacin co-treated with bis(4-hydroxyphenyl)sulfone] affects the expression of IFITM1 mRNA	affects^cotreatment|affects^expression	1	1
Dexamethasone	D003907	1950/2/2	IFITM1	8519	Dexamethasone results in decreased expression of IFITM1 mRNA	decreases^expression	1	1
Dexamethasone	D003907	1950/2/2	IFITM1	8519	[INS protein co-treated with Dexamethasone co-treated with 1-Methyl-3-isobutylxanthine co-treated with Indomethacin co-treated with bisphenol F] results in increased expression of IFITM1 mRNA	affects^cotreatment|increases^expression	1	1
Dexamethasone	D003907	1950/2/2	IFITM3	10410	[INS protein co-treated with Dexamethasone co-treated with 1-Methyl-3-isobutylxanthine co-treated with Indomethacin co-treated with bisphenol A] results in increased expression of IFITM3 mRNA	affects^cotreatment|increases^expression	1	1
Dexamethasone	D003907	1950/2/2	IFITM3	10410	[INS protein co-treated with Dexamethasone co-treated with 1-Methyl-3-isobutylxanthine co-treated with Indomethacin co-treated with bisphenol F] results in increased expression of IFITM3 mRNA	affects^cotreatment|increases^expression	1	1
Dexamethasone	D003907	1950/2/2	OAS1	4938	N-(oxo-5,6-dihydrophenanthridin-2-yl)-N,N-dimethylacetamide hydrochloride inhibits the reaction [Dexamethasone results in decreased expression of OAS1 mRNA]	decreases^expression|decreases^reaction	1	1
Dexamethasone	D003907	1950/2/2	OAS1	4938	Dexamethasone results in decreased expression of OAS1 mRNA	decreases^expression	1	1
Diethylstilbestrol	D004054	56-53-1	IFIT3	3437	Diethylstilbestrol results in increased expression of IFIT3 mRNA	increases^expression	1	1
Diethylstilbestrol	D004054	56-53-1	IFI27	3429	Diethylstilbestrol results in increased expression of IFI27 mRNA	increases^expression	1	1
Diethylstilbestrol	D004054	56-53-1	IFIH1	64135	Diethylstilbestrol results in decreased methylation of IFIH1 gene	decreases^methylation	1	1
Lipopolysaccharides	D008070		IFI6	2537	[Lipopolysaccharides co-treated with Resveratrol] results in decreased expression of IFI6 mRNA	affects^cotreatment|decreases^expression	1	1
Lipopolysaccharides	D008070		PLSCR1	5359	Lipopolysaccharides results in increased expression of PLSCR1 mRNA	increases^expression	2	1
Lipopolysaccharides	D008070		PLSCR1	5359	IL1B protein promotes the reaction [Lipopolysaccharides results in increased expression of PLSCR1 mRNA]	increases^expression|increases^reaction	1	1
Lipopolysaccharides	D008070		PLSCR1	5359	TNF protein promotes the reaction [Lipopolysaccharides results in increased expression of PLSCR1 mRNA]	increases^expression|increases^reaction	1	1
Lipopolysaccharides	D008070		PLSCR1	5359	Lipopolysaccharides results in increased expression of PLSCR1 protein	increases^expression	2	2
Lipopolysaccharides	D008070		IFI16	3428	Lipopolysaccharides results in increased expression of IFI16 protein	increases^expression	1	1
Lipopolysaccharides	D008070		IFI44	10561	genipin inhibits the reaction [Lipopolysaccharides results in increased expression of IFI44 mRNA]	decreases^reaction|increases^expression	1	1
Lipopolysaccharides	D008070		IFI44	10561	Plant Extracts affects the reaction [Lipopolysaccharides affects the expression of IFI44 mRNA]	affects^expression|affects^reaction	1	1
Lipopolysaccharides	D008070		IFI44	10561	Lipopolysaccharides affects the expression of IFI44 mRNA	affects^expression	1	1
Lipopolysaccharides	D008070		IFI44	10561	Lipopolysaccharides results in increased expression of IFI44 mRNA	increases^expression	3	1
Lipopolysaccharides	D008070		MX1	4599	Lipopolysaccharides affects the expression of MX1 mRNA	affects^expression	1	1
Lipopolysaccharides	D008070		MX1	4599	genipin inhibits the reaction [Lipopolysaccharides results in increased expression of MX1 mRNA]	decreases^reaction|increases^expression	1	1
Lipopolysaccharides	D008070		MX1	4599	methyldithiocarbamate inhibits the reaction [Lipopolysaccharides results in increased expression of MX1 mRNA]	decreases^reaction|increases^expression	1	1
Lipopolysaccharides	D008070		MX1	4599	Plant Extracts affects the reaction [Lipopolysaccharides affects the expression of MX1 mRNA]	affects^expression|affects^reaction	1	1
Lipopolysaccharides	D008070		MX1	4599	Lipopolysaccharides results in increased expression of MX1 mRNA	increases^expression	4	2
Lipopolysaccharides	D008070		IFIT3	3437	Lipopolysaccharides results in increased expression of IFIT3 mRNA	increases^expression	3	2
Lipopolysaccharides	D008070		IFIT3	3437	genipin inhibits the reaction [Lipopolysaccharides results in increased expression of IFIT3 mRNA]	decreases^reaction|increases^expression	1	1
Lipopolysaccharides	D008070		IFIT3	3437	Plant Extracts affects the reaction [Lipopolysaccharides affects the expression of IFIT3 mRNA]	affects^expression|affects^reaction	1	1
Lipopolysaccharides	D008070		IFIT3	3437	methyldithiocarbamate inhibits the reaction [Lipopolysaccharides affects the expression of IFIT3 mRNA]	affects^expression|decreases^reaction	1	1
Lipopolysaccharides	D008070		IFIT3	3437	Lipopolysaccharides affects the expression of IFIT3 mRNA	affects^expression	2	2
Lipopolysaccharides	D008070		IFIT2	3433	Lipopolysaccharides results in increased expression of IFIT2 mRNA	increases^expression	4	2
Lipopolysaccharides	D008070		IFIT2	3433	Lipopolysaccharides affects the expression of IFIT2 mRNA	affects^expression	1	1
Lipopolysaccharides	D008070		IFIT2	3433	methyldithiocarbamate inhibits the reaction [Lipopolysaccharides affects the expression of IFIT2 mRNA]	affects^expression|decreases^reaction	1	1
Lipopolysaccharides	D008070		IFIT2	3433	(+)-JQ1 compound inhibits the reaction [Lipopolysaccharides results in increased expression of IFIT2 mRNA]	decreases^reaction|increases^expression	1	1
Lipopolysaccharides	D008070		DDX58	23586	DDX58 protein affects the reaction [TLR4 protein affects the reaction [Lipopolysaccharides results in increased expression of IL6 mRNA]]	affects^reaction|increases^expression	1	1
Lipopolysaccharides	D008070		DDX58	23586	DDX58 protein affects the reaction [Lipopolysaccharides results in increased expression of CXCL8 mRNA]	affects^reaction|increases^expression	1	1
Lipopolysaccharides	D008070		DDX58	23586	TLR4 protein affects the reaction [DDX58 protein affects the reaction [Lipopolysaccharides results in increased expression of CXCL8 mRNA]]	affects^reaction|increases^expression	1	1
Lipopolysaccharides	D008070		DDX58	23586	DDX58 protein affects the reaction [TLR4 protein affects the reaction [Lipopolysaccharides results in increased expression of VCAM1 mRNA]]	affects^reaction|increases^expression	1	1
Lipopolysaccharides	D008070		DDX58	23586	DDX58 protein affects the reaction [TLR4 protein affects the reaction [Lipopolysaccharides results in increased expression of CXCL8 mRNA]]	affects^reaction|increases^expression	1	1
Lipopolysaccharides	D008070		DDX58	23586	Polymyxin B inhibits the reaction [Lipopolysaccharides results in increased expression of DDX58 mRNA]	decreases^reaction|increases^expression	1	1
Lipopolysaccharides	D008070		DDX58	23586	DDX58 protein affects the reaction [Lipopolysaccharides results in increased expression of VCAM1 protein]	affects^reaction|increases^expression	1	1
Lipopolysaccharides	D008070		DDX58	23586	methyldithiocarbamate inhibits the reaction [Lipopolysaccharides results in increased expression of DDX58 mRNA]	decreases^reaction|increases^expression	1	1
Lipopolysaccharides	D008070		DDX58	23586	DDX58 protein affects the reaction [Lipopolysaccharides results in decreased expression of NFKBIA protein]	affects^reaction|decreases^expression	1	1
Lipopolysaccharides	D008070		DDX58	23586	DDX58 protein affects the reaction [Lipopolysaccharides affects the localization of RELA protein]	affects^localization|affects^reaction	1	1
Lipopolysaccharides	D008070		DDX58	23586	Plant Extracts affects the reaction [Lipopolysaccharides affects the expression of DDX58 mRNA]	affects^expression|affects^reaction	1	1
Lipopolysaccharides	D008070		DDX58	23586	Lipopolysaccharides affects the expression of DDX58 mRNA	affects^expression	1	1
Lipopolysaccharides	D008070		DDX58	23586	DDX58 protein affects the reaction [Lipopolysaccharides results in increased expression of ICAM1 mRNA]	affects^reaction|increases^expression	1	1
Lipopolysaccharides	D008070		DDX58	23586	DDX58 protein affects the reaction [Lipopolysaccharides results in increased expression of SELE mRNA]	affects^reaction|increases^expression	1	1
Lipopolysaccharides	D008070		DDX58	23586	TLR4 protein affects the reaction [DDX58 protein affects the reaction [Lipopolysaccharides results in increased expression of SELE mRNA]]	affects^reaction|increases^expression	1	1
Lipopolysaccharides	D008070		DDX58	23586	TLR4 protein affects the reaction [DDX58 protein affects the reaction [Lipopolysaccharides results in increased expression of VCAM1 mRNA]]	affects^reaction|increases^expression	1	1
Lipopolysaccharides	D008070		DDX58	23586	DDX58 protein affects the reaction [Lipopolysaccharides results in increased expression of VCAM1 mRNA]	affects^reaction|increases^expression	1	1
Lipopolysaccharides	D008070		DDX58	23586	DDX58 protein affects the reaction [TLR4 protein affects the reaction [Lipopolysaccharides results in increased expression of SELE mRNA]]	affects^reaction|increases^expression	1	1
Lipopolysaccharides	D008070		DDX58	23586	DDX58 protein affects the reaction [Lipopolysaccharides results in increased expression of IL6 mRNA]	affects^reaction|increases^expression	1	1
Lipopolysaccharides	D008070		DDX58	23586	TLR4 protein affects the reaction [DDX58 protein affects the reaction [Lipopolysaccharides results in increased expression of IL6 mRNA]]	affects^reaction|increases^expression	1	1
Lipopolysaccharides	D008070		DDX58	23586	15-deoxy-delta(12,14)-prostaglandin J2 inhibits the reaction [Lipopolysaccharides results in increased expression of DDX58 mRNA]	decreases^reaction|increases^expression	1	1
Lipopolysaccharides	D008070		DDX58	23586	Lipopolysaccharides results in increased expression of DDX58 mRNA	increases^expression	3	2
Lipopolysaccharides	D008070		EIF2AK2	5610	Lipopolysaccharides results in increased expression of EIF2AK2 mRNA	increases^expression	2	2
Lipopolysaccharides	D008070		EIF2AK2	5610	GW 506033X inhibits the reaction [Lipopolysaccharides results in increased expression of EIF2AK2 mRNA]	decreases^reaction|increases^expression	1	1
Lipopolysaccharides	D008070		EIF2AK2	5610	EIF2AK2 protein affects the reaction [Lipopolysaccharides results in increased secretion of IL1B protein]	affects^reaction|increases^secretion	1	1
Lipopolysaccharides	D008070		EIF2AK2	5610	EIF2AK2 protein affects the reaction [Lipopolysaccharides results in increased expression of IL1B mRNA]	affects^reaction|increases^expression	1	1
Lipopolysaccharides	D008070		EIF2AK2	5610	EIF2AK2 protein affects the reaction [Lipopolysaccharides affects the localization of NFKB1 protein]	affects^localization|affects^reaction	1	1
Lipopolysaccharides	D008070		EIF2AK2	5610	EIF2AK2 protein affects the reaction [Lipopolysaccharides affects the localization of RELA protein]	affects^localization|affects^reaction	1	1
Lipopolysaccharides	D008070		EIF2AK2	5610	EIF2AK2 protein affects the reaction [Lipopolysaccharides results in increased phosphorylation of MAPK3 protein]	affects^reaction|increases^phosphorylation	1	1
Lipopolysaccharides	D008070		EIF2AK2	5610	EIF2AK2 protein affects the reaction [Lipopolysaccharides results in increased phosphorylation of MAPK1 protein]	affects^reaction|increases^phosphorylation	1	1
Lipopolysaccharides	D008070		EIF2AK2	5610	EIF2AK2 protein affects the reaction [Lipopolysaccharides results in increased phosphorylation of NFKBIA protein]	affects^reaction|increases^phosphorylation	1	1
Lipopolysaccharides	D008070		EIF2AK2	5610	GW 506033X inhibits the reaction [Lipopolysaccharides results in increased phosphorylation of EIF2AK2 protein]	decreases^reaction|increases^phosphorylation	1	1
Lipopolysaccharides	D008070		EIF2AK2	5610	Lipopolysaccharides results in increased phosphorylation of EIF2AK2 protein	increases^phosphorylation	2	2
Lipopolysaccharides	D008070		EIF2AK2	5610	EIF2AK2 protein affects the reaction [[TNFSF11 protein results in increased susceptibility to Lipopolysaccharides] which results in increased expression of MATK protein]	affects^reaction|increases^expression|increases^response to substance	1	1
Lipopolysaccharides	D008070		EIF2AK2	5610	EIF2AK2 protein affects the reaction [Lipopolysaccharides promotes the reaction [TNFSF11 protein results in increased expression of FOS protein]]	affects^reaction|increases^expression|increases^reaction	1	1
Lipopolysaccharides	D008070		EIF2AK2	5610	EIF2AK2 protein affects the reaction [Lipopolysaccharides promotes the reaction [TNFSF11 protein results in increased expression of NFATC1 protein]]	affects^reaction|increases^expression|increases^reaction	1	1
Lipopolysaccharides	D008070		EIF2AK2	5610	[TNFSF11 protein results in increased susceptibility to Lipopolysaccharides] which results in increased expression of and results in increased phosphorylation of EIF2AK2 protein	increases^expression|increases^phosphorylation|increases^response to substance	1	1
Lipopolysaccharides	D008070		EIF2AK2	5610	Lipopolysaccharides results in increased expression of EIF2AK2 protein	increases^expression	1	1
Lipopolysaccharides	D008070		EIF2AK2	5610	Lipopolysaccharides affects the expression of EIF2AK2 mRNA	affects^expression	1	1
Lipopolysaccharides	D008070		EIF2AK2	5610	Plant Extracts affects the reaction [Lipopolysaccharides affects the expression of EIF2AK2 mRNA]	affects^expression|affects^reaction	1	1
Lipopolysaccharides	D008070		EIF2AK2	5610	methyldithiocarbamate inhibits the reaction [Lipopolysaccharides results in increased expression of EIF2AK2 mRNA]	decreases^reaction|increases^expression	1	1
Lipopolysaccharides	D008070		IFITM1	8519	Lipopolysaccharides results in increased expression of IFITM1 mRNA	increases^expression	1	1
Lipopolysaccharides	D008070		RTP4	64108	Lipopolysaccharides affects the expression of RTP4 mRNA	affects^expression	1	1
Lipopolysaccharides	D008070		RTP4	64108	Lipopolysaccharides results in increased expression of RTP4 mRNA	increases^expression	2	2
Lipopolysaccharides	D008070		RTP4	64108	Plant Extracts affects the reaction [Lipopolysaccharides affects the expression of RTP4 mRNA]	affects^expression|affects^reaction	1	1
Lipopolysaccharides	D008070		TRIM22	10346	Lipopolysaccharides affects the expression of TRIM22 mRNA	affects^expression	1	1
Lipopolysaccharides	D008070		TRIM22	10346	Plant Extracts affects the reaction [Lipopolysaccharides affects the expression of TRIM22 mRNA]	affects^expression|affects^reaction	1	1
Lipopolysaccharides	D008070		PARP12	64761	Lipopolysaccharides results in increased expression of PARP12 mRNA	increases^expression	1	1
Lipopolysaccharides	D008070		IFIH1	64135	methyldithiocarbamate inhibits the reaction [Lipopolysaccharides affects the expression of IFIH1 mRNA]	affects^expression|decreases^reaction	1	1
Lipopolysaccharides	D008070		IFIH1	64135	Plant Extracts affects the reaction [Lipopolysaccharides affects the expression of IFIH1 mRNA]	affects^expression|affects^reaction	1	1
Lipopolysaccharides	D008070		IFIH1	64135	Lipopolysaccharides results in increased expression of IFIH1 mRNA	increases^expression	2	1
Lipopolysaccharides	D008070		IFIH1	64135	genipin inhibits the reaction [Lipopolysaccharides results in increased expression of IFIH1 mRNA]	decreases^reaction|increases^expression	1	1
Lipopolysaccharides	D008070		IFIH1	64135	Lipopolysaccharides affects the expression of IFIH1 mRNA	affects^expression	2	2
Lipopolysaccharides	D008070		OAS1	4938	Lipopolysaccharides results in increased expression of OAS1 mRNA	increases^expression	1	1
Lipopolysaccharides	D008070		OAS1	4938	Lipopolysaccharides affects the expression of OAS1 mRNA	affects^expression	1	1
Lipopolysaccharides	D008070		OAS1	4938	Plant Extracts affects the reaction [Lipopolysaccharides affects the expression of OAS1 mRNA]	affects^expression|affects^reaction	1	1
Lipopolysaccharides	D008070		RSAD2	91543	(+)-JQ1 compound inhibits the reaction [Lipopolysaccharides results in increased expression of RSAD2 mRNA]	decreases^reaction|increases^expression	1	1
Lipopolysaccharides	D008070		RSAD2	91543	genipin inhibits the reaction [Lipopolysaccharides results in increased expression of RSAD2 mRNA]	decreases^reaction|increases^expression	1	1
Lipopolysaccharides	D008070		RSAD2	91543	Lipopolysaccharides results in increased expression of RSAD2 mRNA	increases^expression	2	1
Lipopolysaccharides	D008070		MX2	4600	Plant Extracts affects the reaction [Lipopolysaccharides affects the expression of MX2 mRNA]	affects^expression|affects^reaction	1	1
Lipopolysaccharides	D008070		MX2	4600	Lipopolysaccharides affects the expression of MX2 mRNA	affects^expression	1	1
Lipopolysaccharides	D008070		MX2	4600	Lipopolysaccharides results in increased expression of MX2 mRNA	increases^expression	3	2
Lipopolysaccharides	D008070		MX2	4600	methyldithiocarbamate inhibits the reaction [Lipopolysaccharides results in increased expression of MX2 mRNA]	decreases^reaction|increases^expression	1	1
Methylprednisolone	D008775	83-43-2	IFI6	2537	Methylprednisolone results in decreased expression of IFI6 mRNA	decreases^expression	1	1
Methylprednisolone	D008775	83-43-2	IFI44	10561	Methylprednisolone results in decreased expression of IFI44 mRNA	decreases^expression	1	1
Methylprednisolone	D008775	83-43-2	IFI44L	10964	Methylprednisolone results in decreased expression of IFI44L mRNA	decreases^expression	1	1
Methylprednisolone	D008775	83-43-2	MX1	4599	Methylprednisolone results in decreased expression of MX1 mRNA	decreases^expression	1	1
Methylprednisolone	D008775	83-43-2	IFIT3	3437	Methylprednisolone results in decreased expression of IFIT3 mRNA	decreases^expression	1	1
Methylprednisolone	D008775	83-43-2	IFI27	3429	Methylprednisolone results in decreased expression of IFI27 mRNA	decreases^expression	1	1
Methylprednisolone	D008775	83-43-2	DDX58	23586	Methylprednisolone results in decreased expression of DDX58 mRNA	decreases^expression	1	1
Methylprednisolone	D008775	83-43-2	IFIH1	64135	Methylprednisolone results in decreased expression of IFIH1 mRNA	decreases^expression	1	1
Methylprednisolone	D008775	83-43-2	OAS1	4938	Methylprednisolone results in decreased expression of OAS1 mRNA	decreases^expression	1	1
Methylprednisolone	D008775	83-43-2	HERC6	55008	Methylprednisolone results in decreased expression of HERC6 mRNA	decreases^expression	1	1
Methylprednisolone	D008775	83-43-2	RSAD2	91543	Methylprednisolone results in decreased expression of RSAD2 mRNA	decreases^expression	1	1
Prednisolone	D011239	50-24-8	IFI6	2537	Prednisolone results in decreased expression of IFI6 mRNA	decreases^expression	1	1
Prednisolone	D011239	50-24-8	IFI44	10561	Prednisolone results in decreased expression of IFI44 mRNA	decreases^expression	1	1
Prednisolone	D011239	50-24-8	IFI44L	10964	Prednisolone results in decreased expression of IFI44L mRNA	decreases^expression	1	1
Prednisolone	D011239	50-24-8	MX1	4599	Prednisolone results in decreased expression of MX1 mRNA	decreases^expression	1	1
Prednisolone	D011239	50-24-8	IFIT3	3437	Prednisolone results in decreased expression of IFIT3 mRNA	decreases^expression	1	1
Prednisolone	D011239	50-24-8	IFI27	3429	Prednisolone results in decreased expression of IFI27 mRNA	decreases^expression	1	1
Prednisolone	D011239	50-24-8	DDX58	23586	Prednisolone results in decreased expression of DDX58 mRNA	decreases^expression	1	1
Prednisolone	D011239	50-24-8	IFIH1	64135	Prednisolone results in decreased expression of IFIH1 mRNA	decreases^expression	1	1
Prednisolone	D011239	50-24-8	OAS1	4938	Prednisolone results in decreased expression of OAS1 mRNA	decreases^expression	1	1
Prednisolone	D011239	50-24-8	HERC6	55008	Prednisolone results in decreased expression of HERC6 mRNA	decreases^expression	1	1
Prednisolone	D011239	50-24-8	RSAD2	91543	Prednisolone results in decreased expression of RSAD2 mRNA	decreases^expression	1	1
Propylthiouracil	D011441	51-52-5	PLSCR1	5359	Propylthiouracil results in decreased expression of PLSCR1 mRNA	decreases^expression	1	1
Propylthiouracil	D011441	51-52-5	PLSCR1	5359	Propylthiouracil results in increased expression of PLSCR1 mRNA	increases^expression	1	1
Propylthiouracil	D011441	51-52-5	IFI44	10561	Propylthiouracil results in increased expression of IFI44 mRNA	increases^expression	1	1
Propylthiouracil	D011441	51-52-5	IFI44	10561	Propylthiouracil results in decreased expression of IFI44 mRNA	decreases^expression	1	1
Propylthiouracil	D011441	51-52-5	MX1	4599	Propylthiouracil results in increased expression of MX1 mRNA	increases^expression	1	1
Propylthiouracil	D011441	51-52-5	IFITM1	8519	Propylthiouracil results in decreased expression of IFITM1 mRNA	decreases^expression	1	1
Propylthiouracil	D011441	51-52-5	RTP4	64108	Propylthiouracil results in increased expression of RTP4 mRNA	increases^expression	1	1
Propylthiouracil	D011441	51-52-5	IFITM3	10410	Propylthiouracil results in increased expression of IFITM3 mRNA	increases^expression	1	1
Propylthiouracil	D011441	51-52-5	IFIH1	64135	Propylthiouracil results in increased expression of IFIH1 mRNA	increases^expression	1	1
Propylthiouracil	D011441	51-52-5	RSAD2	91543	Propylthiouracil results in decreased expression of RSAD2 mRNA	decreases^expression	1	1
Propylthiouracil	D011441	51-52-5	DDX60	55601	Propylthiouracil results in increased expression of DDX60 mRNA	increases^expression	1	1
Protein Kinase Inhibitors	D047428		MX1	4599	Protein Kinase Inhibitors results in decreased expression of MX1 mRNA	decreases^expression	1	1
Protein Kinase Inhibitors	D047428		IFI27	3429	Protein Kinase Inhibitors inhibits the reaction [gardiquimod results in increased expression of IFI27 mRNA]	decreases^reaction|increases^expression	1	1
