# Supplementary material for: Potential Small Molecules for Therapy of Lupus Nephritis Based on Genetic Effect and Immune Infiltration
Source: Biomed Res Int. 2022 Apr 23;2022:2259164. doi: 10.1155/2022/2259164 (PMC9056222; doi:10.1155/2022/2259164)
Supplement: Supplementary Materials — Supplementary Table1: the expression data of GSE32591, which contains 32 glomeruli and tubulointerstitum tissues of LN patients and 14 glomeruli tissues and 15 tubulointerstitum tissues of healthy controls. Supplementary Table2: the expression data of GSE112943 consists of formalin fixed paraffin-embedded kidneys (14 lupus nephritis and 7 control kidney). Supplementary Table3: the data of the relationships between Nine chemicals, 23 hub genes and lupus nephritis. Supplementary Table4: the degree of 23 hub genes in the network between small molecules and genes and the description and function of 23 hub genes. Supplementary Table5: all the data of small molecules based on the 23 hub genes from the DSigDB database. Supplementary Table6: the relationship of nine potential small molecules and 7 common effective drugs for LN were found in the DREIMT database. [file 2259164.f1.zip › Supplementary Table5.txt]

Term	Overlap	P-value	Adjusted P-value	Old P-value	Old Adjusted P-value	Odds Ratio	Combined Score	Genes
acetohexamide PC3 UP	13/23	9.91E-35	1.15E-32	0	0	2595.71	203235.3882	IFITM1;RSAD2;MX2;MX1;IFI6;IFI44;DDX60;IFI44L;IFIH1;PLSCR1;OAS1;IFI27;HERC6
suloctidil HL60 UP	21/141	3.40E-44	1.18E-41	0	0	1737.4875	173903.3107	RTP4;IFITM1;RSAD2;DDX58;MX2;MX1;IFI6;IFI44;EIF2AK2;DDX60;IFI44L;IFIT3;PARP12;IFIT2;IFIH1;PLSCR1;IFI16;OAS1;XAF1;TRIM22;HERC6
prenylamine HL60 UP	15/38	3.01E-37	5.22E-35	0	0	1626.684783	136795.6462	DDX58;MX2;MX1;IFI6;IFI44;EIF2AK2;DDX60;IFI44L;IFIT3;IFIT2;IFIH1;IFI16;OAS1;XAF1;TRIM22
terfenadine HL60 UP	14/60	7.41E-31	6.43E-29	0	0	673.9951691	46759.56226	DDX58;MX2;MX1;IFI6;IFI44;EIF2AK2;IFIT3;IFIT2;IFIH1;PLSCR1;IFI16;OAS1;XAF1;TRIM22
chlorophyllin CTD 00000324	6月30日	6.63E-13	2.56E-11	0	0	293.4264706	8228.322607	IFITM1;IFI27;OAS1;MX1;IFI6;IFIT3
prochlorperazine MCF7 UP	9/58	5.99E-18	4.15E-16	0	0	261.4460641	10368.18927	IFIH1;IFITM1;IFI27;OAS1;DDX58;IFI6;DDX60;PARP12;HERC6
propofol MCF7 UP	8/54	7.80E-16	3.87E-14	0	0	231.084058	8038.826082	IFIH1;IFITM1;IFI27;OAS1;DDX58;IFI6;DDX60;IFIT2
benfluorex MCF7 UP	5月29日	1.47E-10	4.64E-09	0	0	230.9375	5228.228747	IFIH1;OAS1;DDX58;DDX60;IFIT2
mefloquine HL60 UP	4月29日	3.10E-08	5.65E-07	0	0	168.0168421	2905.117943	IFIH1;IFI16;MX1;TRIM22
triprolidine PC3 UP	3月22日	2.02E-06	3.04E-05	0	0	157.5631579	2066.291837	IFITM1;MX1;IFI6
rescinnamine MCF7 UP	3月24日	2.65E-06	3.83E-05	0	0	142.5428571	1830.572191	IFITM1;IFI27;IFI6
clioquinol PC3 UP	5/49	2.33E-09	5.39E-08	0	0	125.8396465	2501.434373	OAS1;MX1;IFI44;IFIT3;IFIT2
suloctidil PC3 UP	5/52	3.17E-09	6.87E-08	0	0	117.7895981	2305.208199	IFIH1;OAS1;DDX58;IFIT3;IFIT2
vigabatrin HL60 UP	3月31日	5.85E-06	7.80E-05	0	0	106.8696429	1287.737575	PLSCR1;MX2;MX1
hycanthone PC3 UP	2月21日	2.62E-04	0.002274106	0	0	100.0401003	824.9920614	IFITM1;IFI6
POLY I-C CTD 00006579	3/34	7.77E-06	9.98E-05	0	0	96.51290323	1135.545175	OAS1;MX1;EIF2AK2
ticlopidine MCF7 UP	2月22日	2.88E-04	0.002380732	0	0	95.03333333	774.7119652	DDX58;DDX60
etoposide HL60 UP	9/147	3.66E-14	1.59E-12	0	0	92.41770186	2859.3598	IFIH1;PLSCR1;OAS1;DDX58;MX2;MX1;IFI6;IFI44;TRIM22
S-1,2-Dichlorovinyl-N-acetylcysteine CTD 00002159	2月24日	3.44E-04	0.002711422	0	0	86.38528139	688.9586534	MX1;TRIM22
azacyclonol PC3 UP	6/90	6.65E-10	1.65E-08	0	0	83.58403361	1766.185978	IFIH1;DDX58;IFI44;DDX60;IFIT3;IFIT2
vanoxerine PC3 UP	5/77	2.36E-08	4.55E-07	0	0	76.79398148	1348.569167	IFIH1;RSAD2;IFI44;IFIT3;IFIT2
Gadodiamide hydrate CTD 00002623	3/43	1.59E-05	1.97E-04	0	0	74.76375	826.0377502	RSAD2;IFI44L;IFIT3
3'-Azido-3'-deoxythymidine CTD 00007047	13/374	2.68E-17	1.55E-15	0	0	70.63933518	2695.366447	IFITM1;RSAD2;MX2;MX1;IFI6;IFI44L;IFIT2;IFIH1;PLSCR1;IFI27;OAS1;TRIM22;HERC6
thioridazine HL60 UP	4/65	8.59E-07	1.35E-05	0	0	68.73511648	960.0830155	IFIH1;MX1;IFIT3;IFIT2
Ephedrone CTD 00002112	2/38	8.67E-04	0.006141167	0	0	52.75396825	371.9283978	IFI27;IFI44L
chlorprothixene MCF7 UP	3/63	5.04E-05	5.28E-04	0	0	49.7925	492.6931777	DDX58;DDX60;IFIT2
ethaverine HL60 UP	1月20日	0.022760983	0.085848492	0	0	47.74641148	180.6107069	PLSCR1
orciprenaline HL60 UP	2/42	0.001059136	0.007206277	0	0	47.46904762	325.1773113	PLSCR1;MX2
clomifene HL60 UP	1月21日	0.023885929	0.087246499	0	0	45.35681818	169.3834835	MX1
cloperastine MCF7 UP	1月21日	0.023885929	0.087246499	0	0	45.35681818	169.3834835	DDX58
salbutamol HL60 UP	1月22日	0.025009636	0.087660037	0	0	43.19480519	159.3237838	PLSCR1
labetalol HL60 UP	1月22日	0.025009636	0.087660037	0	0	43.19480519	159.3237838	IFI6
naftopidil HL60 DOWN	1月22日	0.025009636	0.087660037	0	0	43.19480519	159.3237838	IFIT3
clioquinol HL60 UP	1月23日	0.026132105	0.088900398	0	0	41.22933884	150.2640619	MX1
DICHLOROMETHANE CTD 00006313	2/49	0.001439568	0.00960635	0	0	40.38500507	264.2557265	IFIT3;IFIT2
ETHYLBENZENE CTD 00000178	2/50	0.001498503	0.009629272	0	0	39.54166667	257.1508623	IFIT3;IFIT2
O-XYLENE CTD 00001228	2/50	0.001498503	0.009629272	0	0	39.54166667	257.1508623	IFIT3;IFIT2
protriptyline MCF7 UP	1月24日	0.027253339	0.091814647	0	0	39.43478261	142.0669289	IFI6
isoetarine HL60 UP	2/52	0.001619789	0.010219399	0	0	37.95619048	243.8859487	PLSCR1;MX2
(+)-isoprenaline HL60 UP	1月25日	0.028373338	0.094668733	0	0	37.78977273	134.6187109	PLSCR1
hmba CTD 00000732	1月26日	0.029492103	0.095642615	0	0	36.27636364	127.8245827	IFIT3
NITAZOXANIDE CTD 00001911	1月28日	0.031725939	0.099816175	0	0	33.58585859	115.8920582	EIF2AK2
ICN 1229 CTD 00006697	1月29日	0.032841011	0.100848062	0	0	32.38474026	110.6287727	OAS1
isoxsuprine PC3 UP	1月29日	0.032841011	0.100848062	0	0	32.38474026	110.6287727	MX1
toluene CTD 00006907	2/62	0.0022939	0.013401925	0	0	31.61428571	192.1358831	IFIT3;IFIT2
bepridil PC3 UP	1月30日	0.033954856	0.101571853	0	0	31.26645768	105.7657782	IFIT2
BI-2536 Kinome Scan	1月30日	0.033954856	0.101571853	0	0	31.26645768	105.7657782	EIF2AK2
amantadine PC3 UP	1月30日	0.033954856	0.101571853	0	0	31.26645768	105.7657782	IFI6
CHIR-265/RAF-265 Kinome Scan	1月31日	0.035067473	0.103122146	0	0	30.22272727	101.2606815	EIF2AK2
lasalocid HL60 UP	1月31日	0.035067473	0.103122146	0	0	30.22272727	101.2606815	IFIH1
corbadrine HL60 UP	2/66	0.002594763	0.014760374	0	0	29.63244048	176.4392551	PLSCR1;MX2
etacrynic acid HL60 UP	1/32	0.036178865	0.105496355	0	0	29.24633431	97.07677746	TRIM22
desipramine PC3 UP	2/69	0.002831974	0.015849918	0	0	28.30135039	166.037834	MX1;IFIT3
fluspirilene MCF7 UP	2/70	0.002913234	0.016045906	0	0	27.8837535	162.7990596	DDX58;DDX60
prenylamine PC3 UP	3/111	2.72E-04	0.002299803	0	0	27.59583333	226.5806821	IFIH1;IFIT3;IFIT2
chlorprothixene PC3 UP	2/71	0.002995584	0.016241684	0	0	27.47826087	159.6656204	MX1;IFIT2
dipivefrine HL60 UP	1/35	0.039505699	0.113293203	0	0	26.66176471	86.15243598	PLSCR1
sulconazole MCF7 UP	1/36	0.040612201	0.113975509	0	0	25.8987013	82.97132612	DDX58
securinine PC3 DOWN	1/37	0.041717483	0.114888624	0	0	25.1780303	79.98644731	IFIH1
ivermectin MCF7 UP	1/37	0.041717483	0.114888624	0	0	25.1780303	79.98644731	DDX58
astemizole MCF7 UP	4/173	4.21E-05	4.57E-04	0	0	24.67517907	248.6106137	DDX58;DDX60;IFIT3;IFIT2
clenbuterol HL60 UP	1/38	0.042821548	0.115186644	0	0	24.4963145	77.18087744	PLSCR1
GSK2606414 MRC	1/38	0.042821548	0.115186644	0	0	24.4963145	77.18087744	EIF2AK2
2-Naphthoxyacetic acid BOSS	1/38	0.042821548	0.115186644	0	0	24.4963145	77.18087744	IFIH1
dinoprost HL60 UP	2/80	0.003785434	0.019792074	0	0	24.2967033	135.4928671	PLSCR1;MX2
estradiol CTD 00005920	20/4336	4.51E-11	1.57E-09	0	0	24.19060859	576.2572322	IFITM1;RSAD2;DDX58;MX2;MX1;IFI6;IFI44;EIF2AK2;DDX60;IFI44L;IFIT3;PARP12;IFIT2;IFIH1;PLSCR1;IFI16;IFI27;OAS1;XAF1;HERC6
TRICHLOROETHYLENE CTD 00006932	2/81	0.003878562	0.019792074	0	0	23.98794454	133.1880441	IFIT3;IFIT2
bromocriptine HL60 UP	2/81	0.003878562	0.019792074	0	0	23.98794454	133.1880441	PLSCR1;MX2
testosterone enanthate CTD 00000155	9/533	3.71E-09	7.58E-08	0	0	23.86545802	463.2556653	RSAD2;IFI16;IFI27;MX2;MX1;IFI6;EIF2AK2;IFI44L;IFIT3
dihydroergocristine HL60 UP	2/82	0.003972755	0.019978925	0	0	23.68690476	130.9482106	PLSCR1;MX2
fenoterol HL60 UP	2/84	0.004164325	0.020461991	0	0	23.1068525	126.6533075	PLSCR1;MX2
TETRACHLOROETHYLENE CTD 00006849	1/41	0.046126446	0.123122128	0	0	22.65568182	69.69723344	MX1
tamoxifen CTD 00006827	11/802	3.50E-10	9.43E-09	0	0	22.23409187	484.0851872	IFITM1;PLSCR1;RSAD2;IFI27;OAS1;MX1;IFI6;IFI44L;IFIT3;TRIM22;IFIT2
pimozide MCF7 UP	2/91	0.004868012	0.023461116	0	0	21.28196897	113.3279648	DDX58;IFIT2
prenylamine MCF7 UP	3/145	5.94E-04	0.004483099	0	0	20.95246479	155.6375086	DDX58;DDX60;IFIT2
zardaverine HL60 UP	2/93	0.005078473	0.024140139	0	0	20.81214024	109.9452227	PLSCR1;MX2
22-Hydroxycholesterol CTD 00000121	1/45	0.050516002	0.129844834	0	0	20.59194215	61.47652516	IFIT2
Inosinic acid BOSS	1/46	0.051610368	0.131682336	0	0	20.13333333	59.67585825	IFIH1
mefloquine PC3 UP	2/100	0.00584762	0.027054987	0	0	19.31875607	99.33164622	IFIT3;IFIT2
diltiazem PC3 UP	1/48	0.053795482	0.134295197	0	0	19.27466151	56.33146627	OAS1
Zebularine CTD 00000459	1/48	0.053795482	0.134295197	0	0	19.27466151	56.33146627	EIF2AK2
astemizole PC3 UP	2/102	0.006076596	0.027384138	0	0	18.93047619	96.60810141	IFIT3;IFIT2
pioglitazone PC3 UP	1/49	0.054886233	0.13507463	0	0	18.87215909	54.77630456	OAS1
cinnamaldehyde CTD 00000671	3/165	8.65E-04	0.006141167	0	0	18.34722222	129.4017394	IFI27;MX1;IFI44L
acetaminophen CTD 00005295	19/4135	3.53E-10	9.43E-09	0	0	18.30411808	398.3577906	RTP4;IFITM3;IFITM1;RSAD2;DDX58;MX1;IFI6;IFI44;EIF2AK2;DDX60;IFIT3;PARP12;IFIT2;IFIH1;PLSCR1;IFI16;OAS1;XAF1;TRIM22
dinoprostone PC3 UP	1/52	0.058151273	0.139162012	0	0	17.75935829	50.5201799	OAS1
alprostadil PC3 UP	1/53	0.05923722	0.139832077	0	0	17.41695804	49.2238977	OAS1
midecamycin HL60 UP	3/176	0.001042214	0.007206277	0	0	17.17109827	117.9037653	DDX58;IFI6;IFI44
cadmium acetate CTD 00001325	1/54	0.060321969	0.140481365	0	0	17.08747856	47.98264635	IFI16
acacetin HL60 DOWN	1/54	0.060321969	0.140481365	0	0	17.08747856	47.98264635	IFI16
TPEN CTD 00001994	4/253	1.83E-04	0.001718372	0	0	16.67977172	143.5258464	PLSCR1;IFI27;MX2;IFI6
fendiline MCF7 UP	2/117	0.007922206	0.034797536	0	0	16.44886128	79.58099913	IFIH1;DDX58
(3s)-3-Cyclopentyl-6-Methyl-7-[(4-Methylpiperazin-1-Yl)sulfonyl]-3,4-Dihydro-2h-1,2,4-Benzothiadiazine 1,1-Dioxide BOSS	1/57	0.063569044	0.146082505	0	0	16.16964286	44.55753118	IFIH1
tetryzoline HL60 UP	2/119	0.00818515	0.035503087	0	0	16.16605617	77.68491227	PLSCR1;MX2
0297417-0002B MCF7 UP	1/58	0.064649015	0.147586897	0	0	15.88516746	43.50601712	IFIH1
puromycin HL60 UP	4/274	2.49E-04	0.002211163	0	0	15.36608187	127.5384786	IFIH1;PLSCR1;IFIT3;IFIT2
tamoxifen MCF7 UP	1/61	0.067881786	0.151967611	0	0	15.08863636	40.58824367	DDX58
vanoxerine MCF7 UP	1/61	0.067881786	0.151967611	0	0	15.08863636	40.58824367	IFIT2
Ademetionine BOSS	1/62	0.068956999	0.152408144	0	0	14.84053651	39.68763381	RSAD2
troglitazone PC3 UP	1/62	0.068956999	0.152408144	0	0	14.84053651	39.68763381	OAS1
co-dergocrine mesilate HL60 UP	2/132	0.009988827	0.042269794	0	0	14.53992674	66.9750912	PLSCR1;MX2
dihydroergotamine HL60 UP	2/136	0.0105763	0.043690192	0	0	14.10305615	64.15677158	PLSCR1;MX2
methylergometrine HL60 UP	2/136	0.0105763	0.043690192	0	0	14.10305615	64.15677158	PLSCR1;MX2
3-(1-methylpyrrolidin-2-yl)pyridine CTD 00006393	6/499	1.65E-05	1.97E-04	0	0	13.94869347	153.6356994	IFI27;OAS1;IFI6;IFI44;EIF2AK2;IFI44L
EINECS 250-892-2 CTD 00001193	3/223	0.002054124	0.012504929	0	0	13.47068182	83.35531176	IFITM3;IFITM1;MX1
securinine HL60 DOWN	1/69	0.076450342	0.164771855	0	0	13.30815508	34.21678213	IFIH1
gossypol HL60 UP	1/72	0.079644085	0.168515229	0	0	12.74391805	32.24450227	XAF1
rosiglitazone PC3 UP	1/73	0.080706316	0.169727829	0	0	12.56628788	31.62857298	OAS1
perhexiline HL60 UP	1/74	0.081767375	0.169815654	0	0	12.39352428	31.03185983	IFIH1
rottlerin CTD 00003057	1/74	0.081767375	0.169815654	0	0	12.39352428	31.03185983	PLSCR1
thioridazine MCF7 UP	2/155	0.013569945	0.054123804	0	0	12.33986928	53.06017733	IFI27;IFI6
Demecolcine CTD 00005762	8/876	3.58E-06	4.96E-05	0	0	11.74132104	147.2512101	IFI16;IFI27;IFI44;DDX60;IFI44L;IFIT3;TRIM22;IFIT2
clonidine HL60 UP	1/79	0.087055121	0.177694864	0	0	11.59615385	28.30869069	PLSCR1
geldanamycin HL60 UP	1/80	0.088109169	0.178794629	0	0	11.44879171	27.81116073	PLSCR1
Arsenenous acid CTD 00000922	10/1283	6.03E-07	9.97E-06	0	0	11.30219349	161.8607153	IFITM3;IFITM1;RSAD2;MX2;MX1;IFI6;IFI44;XAF1;IFI44L;TRIM22
benzene CTD 00005481	6/615	5.33E-05	5.28E-04	0	0	11.22457259	110.4543094	IFITM1;MX1;IFI6;IFI44L;IFIT3;IFIT2
Apocarotenal CTD 00000185	1/82	0.090213774	0.180949015	0	0	11.16498316	26.85818378	PLSCR1
KIN001-220 LINCS	1/82	0.090213774	0.180949015	0	0	11.16498316	26.85818378	EIF2AK2
Adenosine triphosphate CTD 00005324	1/85	0.093361973	0.185150682	0	0	10.76461039	25.52581013	OAS1
adenine CTD 00005317	1/86	0.094409055	0.185150682	0	0	10.63743316	25.10560052	TRIM22
ellipticine HL60 UP	1/87	0.09545498	0.185150682	0	0	10.51321353	24.69659571	IFIH1
felodipine MCF7 UP	1/87	0.09545498	0.185150682	0	0	10.51321353	24.69659571	DDX58
(-)-isoprenaline HL60 UP	2/182	0.018379572	0.072473993	0	0	10.47460317	41.86191351	PLSCR1;MX2
Zinc sulfate CTD 00007264	3/287	0.004186747	0.020461991	0	0	10.40123239	56.95539217	IFI27;MX2;IFI6
Dichloromercury CTD 00006273	1/89	0.097543366	0.187203023	0	0	10.2732438	23.91054578	EIF2AK2
(+)-chelidonine HL60 UP	1/90	0.098585828	0.18796309	0	0	10.15730337	23.53272242	PLSCR1
Prestwick-983 HL60 UP	2/189	0.019728615	0.076064771	0	0	10.07894067	39.5667478	PLSCR1;MX2
Tetradioxin CTD 00006848	16/3768	1.55E-07	2.69E-06	0	0	9.884252208	154.9968273	IFITM3;IFITM1;RSAD2;DDX58;MX1;IFI6;IFI44;DDX60;IFI44L;IFIT3;PARP12;IFIH1;PLSCR1;IFI27;OAS1;HERC6
folic acid CTD 00005997	2/194	0.02071717	0.078998438	0	0	9.813988095	38.0467952	IFITM3;IFITM1
Tamibarotene CTD 00002527	5/559	3.71E-04	0.002863004	0	0	9.738768552	76.92211172	PLSCR1;IFI16;OAS1;MX2;IFIT3
Gefitinib CTD 00003879	1/95	0.103780886	0.196786707	0	0	9.614603482	21.78162912	IFI6
2-Naphthalenamine CTD 00007026	1/96	0.104816455	0.197670162	0	0	9.51291866	21.45681143	IFI6
chloroquine BOSS	1/98	0.106884161	0.20048002	0	0	9.3158388	20.83030537	IFIH1
2,2',4,4',5,5'-Hexachlorobiphenyl CTD 00000731	2/208	0.023593463	0.087246499	0	0	9.140545539	34.24766428	RSAD2;MX1
N-acetyl-L-aspartic acid PC3 DOWN	1/100	0.108947298	0.203251142	0	0	9.126721763	20.23294752	OAS1
LUCANTHONE CTD 00006227	2/213	0.024658661	0.087660037	0	0	8.921688107	33.03368384	MX1;TRIM22
beta-carotene CTD 00007253	1/104	0.113059904	0.209795651	0	0	8.770520741	19.11830979	PLSCR1
Axitinib	1/105	0.114085215	0.210572179	0	0	8.685751748	18.85511335	EIF2AK2
cicloheximide HL60 UP	4/485	0.002096968	0.012545652	0	0	8.533099902	52.62587058	IFIH1;PLSCR1;OAS1;TRIM22
clomipramine PC3 DOWN	1/108	0.117154351	0.215092908	0	0	8.440951572	18.09961995	IFI44
1-NITROPYRENE CTD 00001569	2/234	0.029343619	0.095642615	0	0	8.105500821	28.60171998	IFITM1;OAS1
emetine HL60 UP	6/849	3.12E-04	0.002516401	0	0	8.010885493	64.67228001	IFIH1;PLSCR1;DDX58;MX2;TRIM22;HERC6
3,3',4,4',5-Pentachlorobiphenyl CTD 00001077	2/237	0.030040082	0.096517672	0	0	8.000810537	28.04462277	XAF1;IFI44L
Glycidamide CTD 00002776	1/114	0.123262138	0.225115589	0	0	7.990345937	16.72732568	IFITM1
puromycin MCF7 UP	2/242	0.031215597	0.099374423	0	0	7.832142857	27.15276587	IFIH1;DDX58
quinpirole HL60 UP	2/245	0.03192967	0.099816175	0	0	7.734273956	26.63853807	PLSCR1;MX2
meclofenoxate HL60 UP	3/387	0.00955197	0.040920167	0	0	7.653515625	35.59656153	RTP4;OAS1;MX1
POTASSIUM CHROMATE CTD 00001284	10/1897	2.07E-05	2.39E-04	0	0	7.374342668	79.54539326	IFIH1;OAS1;DDX58;MX2;MX1;DDX60;IFIT3;PARP12;TRIM22;HERC6
azacyclonol MCF7 UP	1/126	0.135356678	0.243361488	0	0	7.218909091	14.43667707	DDX58
0297417-0002B PC3 UP	1/127	0.13635732	0.243896856	0	0	7.161255411	14.26863301	IFIT2
DEOXYNIVALENOL CTD 00000341	1/130	0.139352606	0.244011677	0	0	6.993657505	13.78273533	EIF2AK2
Oxazolone CTD 00006449	1/130	0.139352606	0.244011677	0	0	6.993657505	13.78273533	IFIT2
8-azaguanine HL60 UP	3/428	0.012540804	0.051181292	0	0	6.900705882	30.21658773	DDX58;MX2;IFIT2
colchicine HL60 UP	1/132	0.141343939	0.244011677	0	0	6.886190146	13.4732378	PLSCR1
1-Methyl-3-nitro-1-nitrosoguanidine CTD 00006318	1/132	0.141343939	0.244011677	0	0	6.886190146	13.4732378	IFITM1
flunixin HL60 UP	1/133	0.142337953	0.244511236	0	0	6.833677686	13.32260384	OAS1
cyclophosphamide CTD 00005734	2/280	0.040729001	0.113975509	0	0	6.748544022	21.60084024	MX2;XAF1
retinol BOSS	1/135	0.144322679	0.246699358	0	0	6.731004071	13.02922922	IFIH1
(-)-Epigallocatechin gallate CTD 00002033	10/2114	5.32E-05	5.28E-04	0	0	6.534439895	64.30352941	IFIH1;OAS1;DDX58;MX2;MX1;DDX60;IFIT3;PARP12;TRIM22;HERC6
Decitabine CTD 00000750	9/1800	9.65E-05	9.30E-04	0	0	6.527638191	60.35466115	IFITM3;IFITM1;IFI27;MX1;IFI6;EIF2AK2;XAF1;TRIM22;HERC6
colchicine CTD 00005701	1/140	0.149265292	0.253897335	0	0	6.487246566	12.33893806	TRIM22
17-Ethynyl estradiol CTD 00005932	2/304	0.047235882	0.124842187	0	0	6.204667297	18.94037648	IFI6;TRIM22
Crizotinib	1/147	0.156139093	0.263010997	0	0	6.174034869	11.46523243	EIF2AK2
podophyllotoxin HL60 UP	2/306	0.047794589	0.124842187	0	0	6.163220551	18.74138518	PLSCR1;MX2
pergolide HL60 UP	2/312	0.049485482	0.12814524	0	0	6.042089094	18.16297873	PLSCR1;MX2
tolazoline PC3 DOWN	1/153	0.16198861	0.271546124	0	0	5.928528708	10.79128139	IFI44
cyclosporin A CTD 00007121	15/4825	3.44E-05	3.85E-04	0	0	5.9122921	60.77135374	RTP4;DDX58;MX1;IFI6;IFI44;IFI44L;IFIT3;PARP12;IFIT2;PLSCR1;IFI16;OAS1;XAF1;TRIM22;HERC6
phenoxybenzamine PC3 UP	1/154	0.162959751	0.271860738	0	0	5.889483066	10.68500664	IFI16
AZD5438 LINCS	1/156	0.164898804	0.272776074	0	0	5.812903226	10.47731222	EIF2AK2
dexverapamil MCF7 DOWN	2/326	0.053515396	0.134295197	0	0	5.776895944	16.91351445	PLSCR1;EIF2AK2
Vanadic sulfate CTD 00001628	1/157	0.165866719	0.272776074	0	0	5.77534965	10.37582402	XAF1
N-NITROSODIETHYLAMINE CTD 00005817	1/157	0.165866719	0.272776074	0	0	5.77534965	10.37582402	IFI6
thapsigargin PC3 DOWN	2/329	0.054394023	0.134819471	0	0	5.723023154	16.66258766	EIF2AK2;IFI44L
HC toxin MCF7 UP	2/332	0.055277874	0.135080439	0	0	5.67012987	16.41719513	IFITM1;IFI6
ellipticine HL60 DOWN	1/161	0.169727658	0.27780895	0	0	5.629829545	9.984841263	IFI16
cyclopenthiazide PC3 UP	2/335	0.056166906	0.135581279	0	0	5.618189618	16.17716997	IFIH1;OAS1
5-Fluorouracil CTD 00005987	6/1202	0.001937653	0.012006527	0	0	5.542297856	34.61873305	IFITM1;PLSCR1;IFI16;IFI6;XAF1;IFIT2
niclosamide PC3 UP	1/168	0.176443204	0.287445032	0	0	5.391943386	9.353707458	IFI16
vincristine CTD 00006988	6/1245	0.002317336	0.013401925	0	0	5.337701182	32.38563267	IFIH1;IFI44;DDX60;IFI44L;TRIM22;IFIT2
vorinostat PC3 DOWN	2/355	0.062223072	0.143942706	0	0	5.294482666	14.70293414	PARP12;IFIT2
Irinotecan hydrochloride CTD 00002224	3/565	0.026094031	0.088900398	0	0	5.181939502	18.89360367	IFITM1;MX2;IFI6
0175029-0000 MCF7 UP	2/368	0.066276176	0.150312635	0	0	5.103044496	13.84927891	IFI27;IFI6
niclosamide HL60 UP	1/178	0.185946777	0.300109449	0	0	5.084745763	8.554041319	IFIH1
Caspan CTD 00000180	4/808	0.012684701	0.051181292	0	0	5.020424195	21.9259932	IFITM1;PLSCR1;IFI16;TRIM22
folic acid BOSS	1/181	0.188777332	0.301869743	0	0	4.999242424	8.334672454	IFI6
parthenolide HL60 DOWN	1/181	0.188777332	0.301869743	0	0	4.999242424	8.334672454	IFIH1
TERT-BUTYL HYDROPEROXIDE CTD 00007349	6/1341	0.003368754	0.017983963	0	0	4.928486451	28.05891991	IFIH1;IFITM1;RSAD2;IFI27;OAS1;MX1
ETHYL METHANESULFONATE CTD 00005938	9/2315	6.56E-04	0.004845539	0	0	4.926248296	36.10385256	RTP4;IFIH1;IFI16;DDX60;XAF1;IFI44L;IFIT3;TRIM22;IFIT2
ZEARALENONE CTD 00007008	1/184	0.191598472	0.30497555	0	0	4.916542474	8.123865615	IFITM3
Sunitinib Kinome Scan	1/185	0.192536765	0.305069668	0	0	4.889575099	8.05541928	EIF2AK2
sanguinarine HL60 UP	2/384	0.071384998	0.156775912	0	0	4.885315383	12.89560849	IFIT3;IFIT2
Sunitinib FDA	1/187	0.194410226	0.306637947	0	0	4.836510264	7.921162924	EIF2AK2
piperlongumine HL60 DOWN	2/389	0.073007868	0.159331635	0	0	4.820967147	12.6173777	IFI16;EIF2AK2
Retinoic acid CTD 00006918	13/4258	2.35E-04	0.002144253	0	0	4.817809187	40.26099977	IFITM3;IFITM1;DDX58;MX2;IFI6;IFI44;IFIT3;IFIT2;PLSCR1;IFI16;OAS1;XAF1;TRIM22
NICKEL CTD 00006389	1/189	0.196279529	0.308185505	0	0	4.784574468	7.790318149	MX1
ciglitazone CTD 00001835	1/190	0.197212624	0.308255768	0	0	4.759018759	7.726137614	OAS1
NICKEL CHLORIDE CTD 00001064	2/399	0.076290145	0.164771855	0	0	4.697133261	12.08671737	IFIH1;IFI44L
Aizen uranine BOSS	1/194	0.200934653	0.311269306	0	0	4.659444183	7.477362031	IFI16
R406 LINCS	1/194	0.200934653	0.311269306	0	0	4.659444183	7.477362031	EIF2AK2
alprostadil HL60 UP	2/409	0.079619951	0.168515229	0	0	4.579384579	11.58808951	PLSCR1;MX2
cephaeline MCF7 DOWN	1/201	0.207408518	0.318454671	0	0	4.494772727	7.070569276	EIF2AK2
R406 Kinome Scan	1/203	0.209248959	0.319865149	0	0	4.449819982	6.960544328	EIF2AK2
Vorinostat CTD 00003560	2/425	0.085043002	0.174614922	0	0	4.4025667	10.85055814	MX1;TRIM22
scopolamine PC3 UP	2/454	0.095155117	0.185150682	0	0	4.113990729	9.67712199	RTP4;XAF1
chlorzoxazone HL60 UP	2/455	0.095510006	0.185150682	0	0	4.104698833	9.639984807	OAS1;MX1
etoposide CTD 00005948	2/461	0.097647686	0.187203023	0	0	4.049797697	9.421406092	IFITM1;XAF1
anisomycin MCF7 UP	3/718	0.047850175	0.124842187	0	0	4.040979021	12.28328513	IFIH1;DDX58;DDX60
tolazoline PC3 UP	1/224	0.228328419	0.345982364	0	0	4.026498166	5.947018016	RTP4
SARIN CTD 00006722	1/229	0.232805809	0.351233111	0	0	3.937200957	5.738669667	IFI16
Retinoic acid BOSS	1/232	0.235480303	0.352954264	0	0	3.885478158	5.618898784	IFIH1
bucladesine HL60 UP	1/233	0.236369818	0.352954264	0	0	3.868534483	5.5798104	RTP4
cephaeline PC3 DOWN	1/234	0.237258343	0.352954264	0	0	3.851736247	5.541129631	EIF2AK2
spiperone PC3 UP	1/236	0.239032427	0.352954264	0	0	3.818568665	5.464967686	IFI16
Prestwick-983 HL60 DOWN	1/236	0.239032427	0.352954264	0	0	3.818568665	5.464967686	XAF1
midecamycin HL60 DOWN	1/238	0.240802563	0.354061396	0	0	3.785960875	5.390367506	IFI16
cephaeline HL60 UP	3/767	0.056264277	0.135581279	0	0	3.772185864	10.85520212	IFIH1;PLSCR1;MX2
tretinoin HL60 UP	1/241	0.243450385	0.356230531	0	0	3.738068182	5.281300163	MX2
1-chloro-2,4-dinitrobenzene CTD 00005848	1/242	0.244331027	0.356230531	0	0	3.722368917	5.245678806	IFIT2
Vitinoin CTD 00007069	3/780	0.058610487	0.139300267	0	0	3.706563707	10.51493426	IFITM1;OAS1;TRIM22
emetine MCF7 DOWN	1/244	0.246089372	0.357292937	0	0	3.691358025	5.175507315	EIF2AK2
cicloheximide PC3 DOWN	1/247	0.248719552	0.359607019	0	0	3.64578714	5.072855099	EIF2AK2
AZD7762 LINCS	1/254	0.254822551	0.366630631	0	0	3.543657923	4.84484608	EIF2AK2
mitoxantrone CTD 00006345	1/255	0.255690527	0.366630631	0	0	3.529527559	4.813525376	IFITM1
trichostatin A PC3 DOWN	4/1133	0.038335355	0.110853069	0	0	3.514614703	11.46250356	IFI16;MX1;PARP12;IFIT2
Sunitinib	1/258	0.258288656	0.36883195	0	0	3.48779625	4.721351295	EIF2AK2
emetine PC3 DOWN	1/260	0.260015921	0.369515919	0	0	3.460512461	4.661353244	EIF2AK2
quercetin CTD 00006679	9/3158	0.005967087	0.027244462	0	0	3.43537631	17.5942676	IFIH1;PLSCR1;RSAD2;OAS1;DDX58;IFI6;EIF2AK2;PARP12;TRIM22
VITAMIN E CTD 00006994	5/1510	0.026097107	0.088900398	0	0	3.409376154	12.43034963	IFITM3;IFITM1;MX1;IFI6;EIF2AK2
formaldehyde CTD 00006001	9/3192	0.006414076	0.028534416	0	0	3.391813653	17.12615002	RTP4;IFIH1;RSAD2;IFI16;EIF2AK2;XAF1;IFIT3;TRIM22;IFIT2
tolnaftate PC3 UP	1/266	0.265174661	0.372228998	0	0	3.381132075	4.488001694	IFIH1
rifabutin MCF7 UP	1/267	0.266031099	0.372228998	0	0	3.368250171	4.460041726	DDX58
digoxin HL60 UP	1/267	0.266031099	0.372228998	0	0	3.368250171	4.460041726	IFIH1
puromycin PC3 UP	2/552	0.131645163	0.239166867	0	0	3.363982684	6.820963121	PARP12;IFIT2
aspirin CTD 00005447	2/561	0.135149497	0.243361488	0	0	3.308288611	6.621121911	OAS1;MX1
CEP-701 Kinome Scan	1/272	0.27029899	0.376681725	0	0	3.305266689	4.324037678	EIF2AK2
SELENIUM CTD 00006731	5/1559	0.029487663	0.095642615	0	0	3.293114543	11.604222	IFITM3;IFITM1;MX1;IFI6;EIF2AK2
Bortezomib CTD 00003736	3/878	0.077779724	0.166602249	0	0	3.274628571	8.362990391	IFITM1;IFI44;XAF1
vorinostat HL60 DOWN	2/569	0.138283165	0.244011677	0	0	3.26026707	6.450281173	DDX60;XAF1
benzo[a]pyrene CTD 00005488	11/4424	0.005689547	0.026679363	0	0	3.232948108	16.71151166	IFIH1;IFITM1;RSAD2;IFI27;OAS1;MX2;MX1;IFI6;XAF1;IFIT3;TRIM22
NICKEL SULFATE CTD 00001417	2/576	0.141039118	0.244011677	0	0	3.219346275	6.305791474	TRIM22;IFIT2
anisomycin PC3 UP	3/899	0.082216224	0.169815654	0	0	3.194363839	7.980806985	IFI44;DDX60;IFIT2
arbutin CTD 00005438	1/282	0.278763665	0.379337223	0	0	3.18602394	4.069798098	IFIT3
valproic acid HL60 UP	1/289	0.284632966	0.385811091	0	0	3.107481061	3.90472014	IFI16
luteolin HL60 DOWN	1/293	0.287966311	0.388810544	0	0	3.064290162	3.814770927	IFI16
OCHRATOXIN A CTD 00001202	1/297	0.291284796	0.39176676	0	0	3.022266585	3.727826238	XAF1
lycorine PC3 DOWN	1/302	0.295412101	0.39578378	0	0	2.971307762	3.623164979	EIF2AK2
anisomycin MCF7 DOWN	1/307	0.29951641	0.399295324	0	0	2.92201426	3.522739693	EIF2AK2
mitomycin C CTD 00007136	1/308	0.300334523	0.399295324	0	0	2.912348238	3.503142393	MX1
Fulvestrant CTD 00002740	1/310	0.301968008	0.399934728	0	0	2.893203883	3.464421282	IFI6
Staurosporine Kinome Scan	1/315	0.306035776	0.401795365	0	0	2.846409959	3.370301016	EIF2AK2
methazolamide HL60 UP	1/316	0.306846604	0.401795365	0	0	2.837229437	3.351923616	OAS1
cycloheximide CTD 00005731	1/324	0.313300687	0.407173551	0	0	2.765831692	3.21000183	IFI6
Torcetrapib CTD 00004291	1/327	0.315706115	0.408281145	0	0	2.739960959	3.159020214	IFI16
sulfamonomethoxine HL60 UP	1/328	0.316506132	0.408281145	0	0	2.731442869	3.142286463	OAS1
amikacin PC3 DOWN	1/335	0.322081254	0.413934055	0	0	2.67324442	3.028656076	IFITM3
VALPROIC ACID CTD 00006977	15/8312	0.018884838	0.073629649	0	0	2.639508256	10.47725327	IFITM3;IFITM1;DDX58;MX2;MX1;IFI6;EIF2AK2;DDX60;IFIT3;PARP12;IFIH1;PLSCR1;IFI16;TRIM22;HERC6
medrysone HL60 UP	1/341	0.326825283	0.418481082	0	0	2.62526738	2.935914094	MX1
mebendazole HL60 UP	1/346	0.330754368	0.421955021	0	0	2.586561265	2.861717762	PLSCR1
5-azacytidine CTD 00005455	1/352	0.335440318	0.423264692	0	0	2.541569542	2.776184948	XAF1
cicloheximide MCF7 UP	1/354	0.336995315	0.423686139	0	0	2.526912181	2.748487638	DDX58
phenobarbital CTD 00006510	3/1129	0.137561234	0.244011677	0	0	2.511234458	4.981500938	IFITM3;PLSCR1;IFIT2
metronidazole PC3 DOWN	2/745	0.210647281	0.32059038	0	0	2.465423316	3.840069879	IFI16;OAS1
diltiazem PC3 DOWN	1/364	0.344718238	0.43183115	0	0	2.456048084	2.615759726	IFITM3
trichostatin A CTD 00000660	8/3584	0.040657202	0.113975509	0	0	2.446085011	7.833781197	IFIH1;PLSCR1;IFI16;DDX58;MX1;IFI6;DDX60;IFIT3
raloxifene HL60 UP	1/371	0.350073005	0.435395458	0	0	2.408722359	2.528227652	OAS1
minoxidil PC3 UP	1/371	0.350073005	0.435395458	0	0	2.408722359	2.528227652	IFIH1
nocodazole HL60 UP	1/373	0.351595234	0.435726951	0	0	2.395527859	2.503984588	PLSCR1
sanguinarine MCF7 DOWN	1/376	0.353872185	0.435755858	0	0	2.376	2.468235107	EIF2AK2
digitoxigenin MCF7 DOWN	1/377	0.354629468	0.435755858	0	0	2.369559961	2.456479654	IFIH1
cicloheximide PC3 UP	1/378	0.355385902	0.435755858	0	0	2.363154087	2.444803502	IFIT2
latamoxef HL60 UP	3/1196	0.155717277	0.263010997	0	0	2.361777033	4.392228019	RTP4;IFIH1;OAS1
ampyrone HL60 UP	1/380	0.356896226	0.436066867	0	0	2.350443751	2.421686228	OAS1
doxycycline HL60 UP	1/390	0.364397212	0.443669588	0	0	2.288852536	2.310621272	OAS1
apigenin HL60 DOWN	1/396	0.368857557	0.447529973	0	0	2.253394707	2.247411342	IFI16
Methaneseleninic acid CTD 00000412	1/402	0.373287954	0.449760139	0	0	2.21899796	2.186612047	IFI16
cephaeline HL60 DOWN	1/411	0.379877814	0.452943743	0	0	2.169290466	2.099668435	EIF2AK2
Pentabromodiphenyl ether CTD 00003077	1/415	0.382785318	0.453332782	0	0	2.147891963	2.062579788	MX1
paclitaxel PC3 DOWN	1/417	0.384234175	0.453500881	0	0	2.137347028	2.044379016	IFITM3
lycorine HL60 DOWN	2/862	0.260897407	0.369515919	0	0	2.117054264	2.844533442	XAF1;TRIM22
digitoxigenin HL60 UP	1/421	0.387122137	0.453975608	0	0	2.116558442	2.008645784	IFIH1
cimetidine PC3 UP	1/422	0.387842101	0.453975608	0	0	2.111423019	1.999849047	OAS1
proscillaridin MCF7 DOWN	1/423	0.388561255	0.453975608	0	0	2.106311935	1.991106045	IFIH1
Zoledronic acid CTD 00003127	1/425	0.389997141	0.454124187	0	0	2.096162093	1.973779495	TRIM22
lanatoside C HL60 UP	1/432	0.394997382	0.458408334	0	0	2.061379456	1.914766193	IFIH1
Disodium selenite CTD 00007229	3/1370	0.206181895	0.3179783	0	0	2.042062911	3.224410219	XAF1;TRIM22;HERC6
Silica CTD 00006678	2/898	0.276482093	0.379337223	0	0	2.028167517	2.607430866	MX1;IFIT2
zalcitabine PC3 UP	2/902	0.278214708	0.379337223	0	0	2.018730159	2.582686924	IFIH1;OAS1
digoxin MCF7 DOWN	1/449	0.406978128	0.470738034	0	0	1.98143263	1.781299682	PLSCR1
digoxin HL60 DOWN	1/452	0.409068681	0.47158416	0	0	1.96795001	1.759095831	IFI16
calcitriol CTD 00005558	4/1958	0.182678627	0.29621254	0	0	1.941819749	3.301145625	RSAD2;OAS1;IFIT3;IFIT2
Enterolactone CTD 00001393	2/971	0.308082833	0.40189753	0	0	1.868199912	2.199593532	IFI44L;IFIT2
thapsigargin PC3 UP	1/484	0.430933744	0.493418359	0	0	1.834556748	1.544331572	IFI16
ouabain MCF7 DOWN	1/486	0.432274297	0.493418359	0	0	1.826804124	1.532131384	PLSCR1
alprostadil HL60 DOWN	1/500	0.441573948	0.502232054	0	0	1.774275824	1.450310413	IFI16
Dasatinib CTD 00004330	1/502	0.442890515	0.502232054	0	0	1.767011432	1.439111864	IFIT3
diazinon CTD 00005790	2/1027	0.332220563	0.422273024	0	0	1.760929152	1.940466768	MX2;EIF2AK2
anisomycin HL60 DOWN	2/1034	0.335226736	0.423264692	0	0	1.74833887	1.910843739	EIF2AK2;TRIM22
curcumin CTD 00000663	1/528	0.459737989	0.519638705	0	0	1.677591858	1.303654183	XAF1
helveticoside HL60 DOWN	1/534	0.463556072	0.522253107	0	0	1.658195463	1.274866978	IFI16
trichostatin A HL60 DOWN	1/543	0.469234841	0.526940096	0	0	1.629906072	1.233271542	MX2
COPPER CTD 00005706	3/1688	0.306491082	0.401795365	0	0	1.628367953	1.925653588	IFI16;IFI44;IFIT3
ouabain HL60 DOWN	1/549	0.472988692	0.529442181	0	0	1.611562707	1.20655089	IFI16
helveticoside MCF7 DOWN	1/555	0.47671714	0.531899831	0	0	1.593616672	1.180602166	IFIH1
anisomycin PC3 DOWN	1/558	0.478571889	0.532257838	0	0	1.58478864	1.167908152	EIF2AK2
CADMIUM CTD 00005555	2/1142	0.381151507	0.452943743	0	0	1.573684211	1.51791021	IFITM3;IFI44
anisomycin HL60 UP	2/1142	0.381151507	0.452943743	0	0	1.573684211	1.51791021	IFIH1;PLSCR1
lanatoside C HL60 DOWN	1/563	0.481649172	0.533968891	0	0	1.570284698	1.147154666	IFI16
AFLATOXIN B1 CTD 00007128	5/3081	0.27458558	0.379337223	0	0	1.526242595	1.972656799	IFI16;IFI27;IFI6;TRIM22;HERC6
7646-79-9 CTD 00000928	5/3094	0.277623461	0.379337223	0	0	1.518650408	1.946134614	PLSCR1;OAS1;IFI44;PARP12;TRIM22
METHYL METHANESULFONATE CTD 00006307	6/3864	0.275964174	0.379337223	0	0	1.474613485	1.898541601	IFIH1;IFITM1;MX2;XAF1;TRIM22;IFIT2
genistein CTD 00007324	2/1231	0.418142892	0.480448952	0	0	1.452826533	1.26676603	IFITM3;MX1
methotrexate CTD 00006299	1/619	0.514949124	0.565570628	0	0	1.423874669	0.945007352	PLSCR1
proscillaridin HL60 DOWN	1/620	0.515524746	0.565570628	0	0	1.421500955	0.941843848	IFI16
progesterone CTD 00006624	3/1915	0.380496369	0.452943743	0	0	1.417233264	1.369442235	OAS1;IFI44L;IFIT3
ambroxol PC3 DOWN	1/622	0.516674032	0.565570628	0	0	1.41677646	0.935558562	IFITM3
emetine MCF7 UP	1/637	0.525210932	0.573107526	0	0	1.38228988	0.890132926	DDX58
hydrogen peroxide CTD 00006118	4/2673	0.37017825	0.447567431	0	0	1.365226479	1.356721983	RTP4;IFITM1;IFI27;XAF1
troglitazone CTD 00002415	1/651	0.533048429	0.579227493	0	0	1.351538462	0.850310958	IFITM1
lanatoside C MCF7 DOWN	1/653	0.534157919	0.579227493	0	0	1.347253207	0.844813656	IFIH1
digoxigenin HL60 DOWN	1/662	0.539119491	0.582786491	0	0	1.328290469	0.820641816	PLSCR1
raloxifene CTD 00007367	1/686	0.552104453	0.593127695	0	0	1.280159257	0.760437671	IFIT2
scriptaid PC3 DOWN	1/692	0.555295592	0.594015382	0	0	1.268648862	0.746288666	PARP12
digitoxigenin PC3 DOWN	1/694	0.556354464	0.594015382	0	0	1.264856356	0.741648098	PARP12
Pirinixic acid CTD 00000280	2/1402	0.486288207	0.53739493	0	0	1.263741497	0.911099249	DDX60;IFIT2
puromycin PC3 DOWN	1/722	0.570927791	0.606390143	0	0	1.213970496	0.680421404	IFITM3
digitoxigenin HL60 DOWN	1/723	0.571439703	0.606390143	0	0	1.21222614	0.678357273	IFI16
emetine PC3 UP	1/801	0.609618177	0.644931425	0	0	1.089602273	0.539268634	IFIT2
sulfaguanidine PC3 UP	1/809	0.613344546	0.645915062	0	0	1.078364086	0.527135029	OAS1
cephaeline MCF7 UP	1/811	0.614270809	0.645915062	0	0	1.075589226	0.524155487	DDX58
0175029-0000 PC3 DOWN	4/3326	0.547042307	0.589514536	0	0	1.05548338	0.636698327	PLSCR1;IFI16;DDX58;PARP12
captopril PC3 DOWN	1/856	0.63455923	0.663229075	0	0	1.016586922	0.462368788	IFI16
lycorine HL60 UP	1/862	0.637185953	0.663974551	0	0	1.009185936	0.454833791	PLSCR1
COUMESTROL CTD 00005717	2/1812	0.629691107	0.660129348	0	0	0.95590634	0.442131427	IFI44L;IFIT2
cimetidine PC3 DOWN	1/953	0.674877112	0.701144784	0	0	0.908374714	0.357195339	EIF2AK2
irinotecan PC3 DOWN	1/999	0.692474723	0.717279787	0	0	0.864410639	0.317656684	PLSCR1
testosterone CTD 00006844	1/1247	0.772713432	0.798010598	0	0	0.683313877	0.176190448	OAS1
irinotecan MCF7 DOWN	1/1272	0.779585119	0.802718209	0	0	0.668979329	0.166571437	PLSCR1
daunorubicin MCF7 DOWN	1/1290	0.7844092	0.80512078	0	0	0.659002751	0.160021984	PLSCR1
arsenite CTD 00000779	1/1300	0.787045435	0.80512078	0	0	0.653579677	0.156512268	XAF1
GW-8510 PC3 DOWN	1/1312	0.790168223	0.80512078	0	0	0.647181194	0.152417265	IFI16
Copper sulfate CTD 00007279	5/6016	0.866305505	0.868809278	0	0	0.645390858	0.092624983	PLSCR1;OAS1;DDX58;PARP12;TRIM22
metronidazole PC3 UP	1/1316	0.791199384	0.80512078	0	0	0.645074317	0.15107981	OAS1
glibenclamide HL60 DOWN	1/1333	0.79552799	0.807158517	0	0	0.636261261	0.145544284	IFI6
camptothecin PC3 DOWN	1/1494	0.832483333	0.842191593	0	0	0.562747366	0.103175272	PLSCR1
atrazine CTD 00005450	2/2968	0.875668919	0.875668919	0	0	0.546222265	0.072520404	IFITM1;IFI6
latamoxef HL60 DOWN	1/1578	0.849135019	0.856540266	0	0	0.530351069	0.086732061	EIF2AK2
resveratrol CTD 00002483	1/1601	0.853410701	0.858358009	0	0	0.522073864	0.082756209	RSAD2
