# Supplementary material for: Potential Small Molecules for Therapy of Lupus Nephritis Based on Genetic Effect and Immune Infiltration
Source: Biomed Res Int. 2022 Apr 23;2022:2259164. doi: 10.1155/2022/2259164 (PMC9056222; doi:10.1155/2022/2259164)
Supplement: Supplementary Materials — Supplementary Table1: the expression data of GSE32591, which contains 32 glomeruli and tubulointerstitum tissues of LN patients and 14 glomeruli tissues and 15 tubulointerstitum tissues of healthy controls. Supplementary Table2: the expression data of GSE112943 consists of formalin fixed paraffin-embedded kidneys (14 lupus nephritis and 7 control kidney). Supplementary Table3: the data of the relationships between Nine chemicals, 23 hub genes and lupus nephritis. Supplementary Table4: the degree of 23 hub genes in the network between small molecules and genes and the description and function of 23 hub genes. Supplementary Table5: all the data of small molecules based on the 23 hub genes from the DSigDB database. Supplementary Table6: the relationship of nine potential small molecules and 7 common effective drugs for LN were found in the DREIMT database. [file 2259164.f1.zip › Supplementary Table6.txt]

drug_common_name	drug_pubchem_id	summary	case_cell_type	case_cell_type_ontology_id	case_cell_subtype	case_cell_subtype_ontology_id	reference_cell_type	reference_cell_type_ontology_id	reference_cell_subtype	reference_cell_subtype_ontology_id	signature_name	up_fdr	down_fdr	tau	drug_specificity_score	drug_status	drug_moa	drug_target_gene_names	drug_target_gene_ids	prediction_type	organism	experimental_design
triprolidine	5282443	triprolidine inhibits dark zone B cell compared to light zone B cell	B cell	CL:0000236	B cell	CL:0000236	B cell	CL:0000236	B cell	CL:0000236	GSE38697_LIGHT_ZONE_VS_DARK_ZONE_BCELL		0.190582564	-95.26296158		APPROVED	histamine receptor antagonist	HRH1	3269	SIGNATURE_DOWN	Homo sapiens	IN_VITRO
triprolidine	5282443	triprolidine inhibits B1 B cell compared to Plasmablast	B cell	CL:0000236	B cell		Other	CL:0000236	Plasmablast	CL:0000980	GSE42724_B1_BCELL_VS_PLASMABLAST	0.304502867	0.605787515	-95.29147982		APPROVED	histamine receptor antagonist	HRH1	3269	SIGNATURE	Homo sapiens	IN_VITRO
triprolidine	5282443	triprolidine inhibits B cell naïve compared to Monocyte	B cell	CL:0000236	B cell naïve	CL:0000576	Monocyte	CL:0000788	Monocyte	CL:0000576	GSE22886_NAIVE_BCELL_VS_MONOCYTE	0.114751286	0.10328856	-95.36621824		APPROVED	histamine receptor antagonist	HRH1	3269	SIGNATURE	Homo sapiens	IN_SILICO
triprolidine	5282443	triprolidine inhibits B cell naïve compared to Neutrophil	B cell	CL:0000236	B cell naïve	CL:0000775	Neutrophil	CL:0000788	Neutrophil	CL:0000775	GSE22886_NAIVE_BCELL_VS_NEUTROPHIL	0.160251046		-95.5613577		APPROVED	histamine receptor antagonist	HRH1	3269	SIGNATURE_UP	Homo sapiens	IN_SILICO
triprolidine	5282443	triprolidine inhibits B cell stimulated with LAIV Influenza vaccine (7 days) compared to B cell stimulated with TIV Influenza vaccine (7 days)	B cell	CL:0000236	B cell	CL:0000236	B cell	CL:0000236	B cell	CL:0000236	GSE29618_LAIV_VS_TIV_FLU_VACCINE_DAY7_BCELL	0.034753414		-95.58000746		APPROVED	histamine receptor antagonist	HRH1	3269	SIGNATURE_UP	Homo sapiens	UNKNOWN
triprolidine	5282443	triprolidine inhibits IgD+ B B cell compared to B cell	B cell	CL:0000236	B cell	CL:0000236	B cell	CL:0000236	B cell	CL:0000236	GSE12845_IGD_POS_BLOOD_VS_DARKZONE_GC_TONSIL_BCELL	0.043602004		-95.85975382		APPROVED	histamine receptor antagonist	HRH1	3269	SIGNATURE_UP	Homo sapiens	PATIENT
triprolidine	5282443	triprolidine inhibits IgD- B B cell compared to B cell	B cell	CL:0000236	B cell	CL:0000236	B cell	CL:0000236	B cell	CL:0000236	GSE12845_IGD_NEG_BLOOD_VS_PRE_GC_TONSIL_BCELL	0.160706932	0.062923251	-96.18834081		APPROVED	histamine receptor antagonist	HRH1	3269	SIGNATURE	Homo sapiens	PATIENT
triprolidine	5282443	triprolidine inhibits Dendritic cell stimulated with Influenza vaccine compared to B cell stimulated with Influenza vaccine	B cell	CL:0000236	B cell	CL:0000451	Dendritic cell	CL:0000236	Dendritic cell	CL:0000451	GSE29618_BCELL_VS_PDC_DAY7_FLU_VACCINE		0.19508823	-96.21409922		APPROVED	histamine receptor antagonist	HRH1	3269	SIGNATURE_DOWN	Homo sapiens	UNKNOWN
triprolidine	5282443	triprolidine inhibits CD21 (high) B cell compared to CD21 (low) B cell	B cell	CL:0000236	B cell	CL:0000236	B cell	CL:0000236	B cell	CL:0000236	GSE17186_CD21LOW_VS_CD21HIGH_TRANSITIONAL_BCELL		0.160251046	-96.58709437		APPROVED	histamine receptor antagonist	HRH1	3269	SIGNATURE_DOWN	Homo sapiens	PATIENT
triprolidine	5282443	triprolidine inhibits B cell stimulated with LAIV Influenza vaccine (7 days) compared to B cell stimulated with TIV Influenza vaccine (7 days)	B cell	CL:0000236	B cell	CL:0000236	B cell	CL:0000236	B cell	CL:0000236	GSE29618_LAIV_VS_TIV_FLU_VACCINE_DAY7_BCELL	0.033015073		-96.6616934		APPROVED	histamine receptor antagonist	HRH1	3269	SIGNATURE_UP	Homo sapiens	UNKNOWN
triprolidine	5282443	triprolidine inhibits B cell compared to B cell stimulated with TIV Influenza vaccine	B cell	CL:0000236	B cell	CL:0000236	B cell	CL:0000236	B cell	CL:0000236	GSE29618_PRE_VS_DAY7_POST_TIV_FLU_VACCINE_BCELL	0.19508823		-96.90414025		APPROVED	histamine receptor antagonist	HRH1	3269	SIGNATURE_UP	Homo sapiens	UNKNOWN
triprolidine	5282443	triprolidine inhibits B cell naïve compared to Plasma cell	B cell	CL:0000236	B cell naïve	CL:0000236	B cell	CL:0000788	Plasma cell	CL:0000786	GSE22886_NAIVE_BCELL_VS_BLOOD_PLASMA_CELL	0.034009463		-96.94143976		APPROVED	histamine receptor antagonist	HRH1	3269	SIGNATURE_UP	Homo sapiens	IN_SILICO
triprolidine	5282443	triprolidine inhibits B cell stimulated with LAIV Influenza vaccine compared to B cell	B cell	CL:0000236	B cell	CL:0000236	B cell	CL:0000236	B cell	CL:0000236	GSE29618_PRE_VS_DAY7_POST_LAIV_FLU_VACCINE_BCELL		0.034753414	-97.07198806		APPROVED	histamine receptor antagonist	HRH1	3269	SIGNATURE_DOWN	Homo sapiens	UNKNOWN
triprolidine	5282443	triprolidine inhibits B cell compared to Myeloid	B cell	CL:0000236	B cell		Other	CL:0000236	Myeloid	CL:0000763	GSE10325_BCELL_VS_MYELOID	0.030984548		-97.57553152		APPROVED	histamine receptor antagonist	HRH1	3269	SIGNATURE_UP	Homo sapiens	IN_VIVO
triprolidine	5282443	triprolidine inhibits B cell compared to B cell stimulated with TIV Influenza vaccine	B cell	CL:0000236	B cell	CL:0000236	B cell	CL:0000236	B cell	CL:0000236	GSE29618_PRE_VS_DAY7_POST_TIV_FLU_VACCINE_BCELL	0.034009463		-98.32152182		APPROVED	histamine receptor antagonist	HRH1	3269	SIGNATURE_UP	Homo sapiens	UNKNOWN
triprolidine	5282443	triprolidine inhibits B cell compared to Myeloid	B cell	CL:0000236	B cell		Other	CL:0000236	Myeloid	CL:0000763	GSE10325_BCELL_VS_MYELOID	0.034009463		-98.34017158		APPROVED	histamine receptor antagonist	HRH1	3269	SIGNATURE_UP	Homo sapiens	IN_VIVO
triprolidine	5282443	triprolidine inhibits CD21 (low) B cell compared to CD21 (high) B cell	B cell	CL:0000236	B cell	CL:0000236	B cell	CL:0000236	B cell	CL:0000236	GSE17186_CD21LOW_VS_CD21HIGH_TRANSITIONAL_BCELL	0.435376185	0.078028412	-98.61733931		APPROVED	histamine receptor antagonist	HRH1	3269	SIGNATURE	Homo sapiens	PATIENT
triprolidine	5282443	triprolidine inhibits pre-B1 B cell compared to pre-B2 B cell	B cell	CL:0000236	B cell	CL:0000236	B cell	CL:0000236	B cell	CL:0000236	GSE4590_PRE_BCELL_VS_LARGE_PRE_BCELL	0.214699853		-98.78776576		APPROVED	histamine receptor antagonist	HRH1	3269	SIGNATURE_UP	Homo sapiens	PATIENT
triprolidine	5282443	triprolidine inhibits B cell naïve compared to Plasma cell	B cell	CL:0000236	B cell naïve	CL:0000236	B cell	CL:0000788	Plasma cell	CL:0000786	GSE22886_NAIVE_BCELL_VS_BLOOD_PLASMA_CELL	0.160251046		-98.93696382		APPROVED	histamine receptor antagonist	HRH1	3269	SIGNATURE_UP	Homo sapiens	IN_SILICO
triprolidine	5282443	triprolidine inhibits dark zone B cell compared to light zone B cell	B cell	CL:0000236	B cell	CL:0000236	B cell	CL:0000236	B cell	CL:0000236	GSE38697_LIGHT_ZONE_VS_DARK_ZONE_BCELL		0.075142592	-99.01156285		APPROVED	histamine receptor antagonist	HRH1	3269	SIGNATURE_DOWN	Homo sapiens	IN_VITRO
triprolidine	5282443	triprolidine inhibits B cell compared to B cell in Lupus erythematosus	B cell	CL:0000236	B cell	CL:0000236	B cell	CL:0000236	B cell	CL:0000236	GSE10325_BCELL_VS_LUPUS_BCELL	0.030984548		-99.04886236		APPROVED	histamine receptor antagonist	HRH1	3269	SIGNATURE_UP	Homo sapiens	PATIENT
triprolidine	5282443	triprolidine inhibits B cell naïve compared to IgG IgA B cell	B cell	CL:0000236	B cell naïve	CL:0000236	B cell	CL:0000788	B cell	CL:0000236	GSE22886_NAIVE_VS_IGG_IGA_MEMORY_BCELL	0.034009463		-99.1234614		APPROVED	histamine receptor antagonist	HRH1	3269	SIGNATURE_UP	Homo sapiens	IN_SILICO
triprolidine	5282443	triprolidine inhibits B cell naïve compared to Monocyte	B cell	CL:0000236	B cell naïve	CL:0000576	Monocyte	CL:0000788	Monocyte	CL:0000576	GSE22886_NAIVE_BCELL_VS_MONOCYTE	0.034009463		-99.29130921		APPROVED	histamine receptor antagonist	HRH1	3269	SIGNATURE_UP	Homo sapiens	IN_SILICO
triprolidine	5282443	triprolidine inhibits B cell naïve compared to Dendritic cell	B cell	CL:0000236	B cell naïve	CL:0000451	Dendritic cell	CL:0000788	Dendritic cell	CL:0000451	GSE22886_NAIVE_BCELL_VS_DC	0.034009463		-99.40320776		APPROVED	histamine receptor antagonist	HRH1	3269	SIGNATURE_UP	Homo sapiens	IN_SILICO
triprolidine	5282443	triprolidine inhibits dark zone B cell compared to light zone B cell	B cell	CL:0000236	B cell	CL:0000236	B cell	CL:0000236	B cell	CL:0000236	GSE38697_LIGHT_ZONE_VS_DARK_ZONE_BCELL		0.214699853	-99.55240582		APPROVED	histamine receptor antagonist	HRH1	3269	SIGNATURE_DOWN	Homo sapiens	IN_VITRO
triprolidine	5282443	triprolidine inhibits B cell naïve compared to Dendritic cell	B cell	CL:0000236	B cell naïve	CL:0000451	Dendritic cell	CL:0000788	Dendritic cell	CL:0000451	GSE22886_NAIVE_BCELL_VS_DC	0.160251046		-99.64565461		APPROVED	histamine receptor antagonist	HRH1	3269	SIGNATURE_UP	Homo sapiens	IN_SILICO
triprolidine	5282443	triprolidine inhibits B cell naïve compared to Monocyte	B cell	CL:0000236	B cell naïve	CL:0000576	Monocyte	CL:0000788	Monocyte	CL:0000576	GSE22886_NAIVE_BCELL_VS_MONOCYTE	0.160251046		-99.75755315		APPROVED	histamine receptor antagonist	HRH1	3269	SIGNATURE_UP	Homo sapiens	IN_SILICO
triprolidine	5282443	triprolidine inhibits B cell naïve compared to IgG IgA B cell	B cell	CL:0000236	B cell naïve	CL:0000236	B cell	CL:0000788	B cell	CL:0000236	GSE22886_NAIVE_VS_IGG_IGA_MEMORY_BCELL	0.160251046		-99.83215218		APPROVED	histamine receptor antagonist	HRH1	3269	SIGNATURE_UP	Homo sapiens	IN_SILICO
triprolidine	5282443	triprolidine inhibits Dendritic cell stimulated with LPS compared to Dendritic cell stimulated with R848	Dendritic cell	CL:0000451	Dendritic cell	CL:0000451	Dendritic cell	CL:0000451	Dendritic cell	CL:0000451	GSE2706_R848_VS_LPS_2H_STIM_DC		0.215272202	-95.02051473		APPROVED	histamine receptor antagonist	HRH1	3269	SIGNATURE_DOWN	Homo sapiens	EX_VIVO
triprolidine	5282443	triprolidine inhibits Dendritic cell stimulated with L.donovani compared to Macrophage stimulated with L.donovani	Dendritic cell	CL:0000451	Dendritic cell	CL:0000235	Macrophage	CL:0000451	Macrophage	CL:0000235	GSE360_DC_VS_MAC_L_DONOVANI	0.930597955	0.050826211	-95.02989537		APPROVED	histamine receptor antagonist	HRH1	3269	SIGNATURE	Homo sapiens	IN_VITRO
triprolidine	5282443	triprolidine inhibits Dendritic cell stimulated with IL3 and HIV compared to Dendritic cell stimulated with IL3 and CpG	Dendritic cell	CL:0000451	Dendritic cell	CL:0000451	Dendritic cell	CL:0000451	Dendritic cell	CL:0000451	GSE10147_IL3_AND_HIVP17_VS_IL3_AND_CPG_STIM_PDC	0.109370241		-95.15106304		APPROVED	histamine receptor antagonist	HRH1	3269	SIGNATURE_UP	Homo sapiens	EX_VIVO
triprolidine	5282443	triprolidine inhibits Dendritic cell compared to Dendritic cell stimulated with LAIV Influenza vaccine	Dendritic cell	CL:0000451	Dendritic cell	CL:0000451	Dendritic cell	CL:0000451	Dendritic cell	CL:0000451	GSE29618_PRE_VS_DAY7_POST_LAIV_FLU_VACCINE_MDC	0.034753414		-95.3002611		APPROVED	histamine receptor antagonist	HRH1	3269	SIGNATURE_UP	Homo sapiens	UNKNOWN
triprolidine	5282443	triprolidine inhibits Dendritic cell compared to Hematopoietic stem and progenitor cells	Dendritic cell	CL:0000451	Dendritic cell	CL:0000837	Hematopoietic stem and progenitor cells	CL:0000451	Hematopoietic stem and progenitor cells	CL:0000837	GSE24759_myeloid_DC_vs_common_myeloid_progenitor_blood	0.035092542		-95.31891085		APPROVED	histamine receptor antagonist	HRH1	3269	SIGNATURE_UP	Homo sapiens	UNKNOWN
triprolidine	5282443	triprolidine inhibits immature Dendritic cell compared to mature Dendritic cell stimulated with L.monocytogenes	Dendritic cell	CL:0000451	Dendritic cell	CL:0000451	Dendritic cell	CL:0000451	Dendritic cell	CL:0000451	GSE9946_IMMATURE_VS_LISTERIA_INF_MATURE_DC	0.345586182		-95.4308094		APPROVED	histamine receptor antagonist	HRH1	3269	SIGNATURE_UP	Homo sapiens	EX_VIVO
triprolidine	5282443	triprolidine inhibits Dendritic cell stimulated with IL3 compared to Dendritic cell stimulated with IL3 and CpG	Dendritic cell	CL:0000451	Dendritic cell	CL:0000451	Dendritic cell	CL:0000451	Dendritic cell	CL:0000451	GSE10147_IL3_VS_IL3_AND_CPG_STIM_PDC	0.348452356		-95.52405819		APPROVED	histamine receptor antagonist	HRH1	3269	SIGNATURE_UP	Homo sapiens	EX_VIVO
triprolidine	5282443	triprolidine inhibits Dendritic cell stimulated with Galectin-1 compared to Dendritic cell stimulated with LPS	Dendritic cell	CL:0000451	Dendritic cell	CL:0000451	Dendritic cell	CL:0000451	Dendritic cell	CL:0000451	GSE4984_GALECTIN1_VS_LPS_STIM_DC	0.451864268	0.457423632	-96.74887892		APPROVED	histamine receptor antagonist	HRH1	3269	SIGNATURE	Homo sapiens	IN_VITRO
triprolidine	5282443	triprolidine inhibits Dendritic cell compared to Dendritic cell stimulated with Newcastle virus	Dendritic cell	CL:0000451	Dendritic cell	CL:0000451	Dendritic cell	CL:0000451	Dendritic cell	CL:0000451	GSE18791_CTRL_VS_NEWCASTLE_VIRUS_DC_1H	0.089462839		-96.97873928		APPROVED	histamine receptor antagonist	HRH1	3269	SIGNATURE_UP	Homo sapiens	IN_VITRO
triprolidine	5282443	triprolidine inhibits Dendritic cell stimulated with LPS compared to Dendritic cell stimulated with R848	Dendritic cell	CL:0000451	Dendritic cell	CL:0000451	Dendritic cell	CL:0000451	Dendritic cell	CL:0000451	GSE2706_R848_VS_LPS_2H_STIM_DC		0.051827127	-97.01603879		APPROVED	histamine receptor antagonist	HRH1	3269	SIGNATURE_DOWN	Homo sapiens	EX_VIVO
triprolidine	5282443	triprolidine inhibits Dendritic cell compared to Dendritic cell stimulated with Newcastle virus	Dendritic cell	CL:0000451	Dendritic cell	CL:0000451	Dendritic cell	CL:0000451	Dendritic cell	CL:0000451	GSE18791_UNSTIM_VS_NEWCATSLE_VIRUS_DC_1H	0.035615601		-97.61283103		APPROVED	histamine receptor antagonist	HRH1	3269	SIGNATURE_UP	Homo sapiens	IN_VITRO
triprolidine	5282443	triprolidine inhibits plasmacytoid Dendritic cell compared to myeloid Dendritic cell stimulated with Influenza vaccine	Dendritic cell	CL:0000451	Dendritic cell	CL:0000451	Dendritic cell	CL:0000451	Dendritic cell	CL:0000451	GSE29618_PRE_VS_DAY7_FLU_VACCINE_MDC	0.114751286	0.595016203	-98.01943199		APPROVED	histamine receptor antagonist	HRH1	3269	SIGNATURE	Homo sapiens	UNKNOWN
triprolidine	5282443	triprolidine inhibits Dendritic cell compared to Dendritic cell stimulated with IFNg and IL1	Dendritic cell	CL:0000451	Dendritic cell	CL:0000451	Dendritic cell	CL:0000451	Dendritic cell	CL:0000451	GSE53163_DC_treated_IL1_IFNG_vs_DC_control		0.035338158	-98.20962327		APPROVED	histamine receptor antagonist	HRH1	3269	SIGNATURE_DOWN	Homo sapiens	UNKNOWN
triprolidine	5282443	triprolidine inhibits Dendritic cell compared to Dendritic cell stimulated with IL1	Dendritic cell	CL:0000451	Dendritic cell	CL:0000451	Dendritic cell	CL:0000451	Dendritic cell	CL:0000451	GSE53163_DC_treated_IL1_vs_DC_control		0.214699853	-98.24692279		APPROVED	histamine receptor antagonist	HRH1	3269	SIGNATURE_DOWN	Homo sapiens	UNKNOWN
triprolidine	5282443	triprolidine inhibits Dendritic cell stimulated with IL3 and HIV compared to Dendritic cell stimulated with IL3	Dendritic cell	CL:0000451	Dendritic cell	CL:0000451	Dendritic cell	CL:0000451	Dendritic cell	CL:0000451	GSE10147_IL3_VS_IL3_AND_HIVP17_STIM_PDC		0.030984548	-98.39612085		APPROVED	histamine receptor antagonist	HRH1	3269	SIGNATURE_DOWN	Homo sapiens	EX_VIVO
triprolidine	5282443	triprolidine inhibits Dendritic cell compared to Dendritic cell stimulated with Newcastle virus	Dendritic cell	CL:0000451	Dendritic cell	CL:0000451	Dendritic cell	CL:0000451	Dendritic cell	CL:0000451	GSE18791_CTRL_VS_NEWCASTLE_VIRUS_DC_1H	0.249895139		-98.45207012		APPROVED	histamine receptor antagonist	HRH1	3269	SIGNATURE_UP	Homo sapiens	IN_VITRO
triprolidine	5282443	triprolidine inhibits Dendritic cell stimulated with L.donovani (24 hours) compared to Dendritic cell stimulated with L.donovani (2 hours)	Dendritic cell	CL:0000451	Dendritic cell	CL:0000451	Dendritic cell	CL:0000451	Dendritic cell	CL:0000451	GSE42088_2H_VS_24H_LEISHMANIA_INF_DC		0.030984548	-98.5080194		APPROVED	histamine receptor antagonist	HRH1	3269	SIGNATURE_DOWN	Homo sapiens	IN_VITRO
triprolidine	5282443	triprolidine inhibits Dendritic cell stimulated with IL6, TNFa, IL1B and PGE compared to Dendritic cell	Dendritic cell	CL:0000451	Dendritic cell	CL:0000451	Dendritic cell	CL:0000451	Dendritic cell	CL:0000451	GSE7509_UNSTIM_VS_TNFA_IL1B_IL6_PGE_STIM_DC		0.184419604	-98.5080194		APPROVED	histamine receptor antagonist	HRH1	3269	SIGNATURE_DOWN	Homo sapiens	IN_VITRO
triprolidine	5282443	triprolidine inhibits Dendritic cell compared to Dendritic cell stimulated with IFNg and IL1	Dendritic cell	CL:0000451	Dendritic cell	CL:0000451	Dendritic cell	CL:0000451	Dendritic cell	CL:0000451	GSE53163_DC_treated_IL1_IFNG_vs_DC_control		0.214699853	-98.56396867		APPROVED	histamine receptor antagonist	HRH1	3269	SIGNATURE_DOWN	Homo sapiens	UNKNOWN
triprolidine	5282443	triprolidine inhibits Dendritic cell stimulated with L.donovani compared to Dendritic cell	Dendritic cell	CL:0000451	Dendritic cell	CL:0000451	Dendritic cell	CL:0000451	Dendritic cell	CL:0000451	GSE42088_UNINF_VS_LEISHMANIA_INF_DC_8H		0.034009463	-98.75046624		APPROVED	histamine receptor antagonist	HRH1	3269	SIGNATURE_DOWN	Homo sapiens	IN_VITRO
triprolidine	5282443	triprolidine inhibits Dendritic cell stimulated with L.donovani compared to Dendritic cell	Dendritic cell	CL:0000451	Dendritic cell	CL:0000451	Dendritic cell	CL:0000451	Dendritic cell	CL:0000451	GSE42088_UNINF_VS_LEISHMANIA_INF_DC_8H		0.160251046	-98.769116		APPROVED	histamine receptor antagonist	HRH1	3269	SIGNATURE_DOWN	Homo sapiens	IN_VITRO
triprolidine	5282443	triprolidine inhibits Dendritic cell compared to Dendritic cell stimulated with LAIV Influenza vaccine	Dendritic cell	CL:0000451	Dendritic cell	CL:0000451	Dendritic cell	CL:0000451	Dendritic cell	CL:0000451	GSE29618_PRE_VS_DAY7_POST_LAIV_FLU_VACCINE_MDC	0.160251046		-98.91831406		APPROVED	histamine receptor antagonist	HRH1	3269	SIGNATURE_UP	Homo sapiens	UNKNOWN
triprolidine	5282443	triprolidine inhibits Dendritic cell compared to Dendritic cell stimulated with LPS	Dendritic cell	CL:0000451	Dendritic cell	CL:0000451	Dendritic cell	CL:0000451	Dendritic cell	CL:0000451	GSE14000_TRANSLATED_RNA_VS_MRNA_16H_LPS_DC	0.034009463		-99.08616188		APPROVED	histamine receptor antagonist	HRH1	3269	SIGNATURE_UP	Homo sapiens	EX_VIVO
triprolidine	5282443	triprolidine inhibits mature Dendritic cell compared to immature Dendritic cell	Dendritic cell	CL:0000451	Dendritic cell	CL:0000451	Dendritic cell	CL:0000451	Dendritic cell	CL:0000451	GSE9946_IMMATURE_VS_MATURE_STIMULATORY_DC		0.214699853	-99.17941067		APPROVED	histamine receptor antagonist	HRH1	3269	SIGNATURE_DOWN	Homo sapiens	EX_VIVO
triprolidine	5282443	triprolidine inhibits Dendritic cell compared to Hematopoietic stem and progenitor cells	Dendritic cell	CL:0000451	Dendritic cell	CL:0000837	Hematopoietic stem and progenitor cells	CL:0000451	Hematopoietic stem and progenitor cells	CL:0000837	GSE24759_myeloid_DC_vs_common_myeloid_progenitor_blood	0.160251046		-99.27265946		APPROVED	histamine receptor antagonist	HRH1	3269	SIGNATURE_UP	Homo sapiens	UNKNOWN
triprolidine	5282443	triprolidine inhibits Dendritic cell stimulated with IL6, TNFa, IL1B and PGE compared to Dendritic cell	Dendritic cell	CL:0000451	Dendritic cell	CL:0000451	Dendritic cell	CL:0000451	Dendritic cell	CL:0000451	GSE7509_UNSTIM_VS_TNFA_IL1B_IL6_PGE_STIM_DC		0.049266787	-99.40320776		APPROVED	histamine receptor antagonist	HRH1	3269	SIGNATURE_DOWN	Homo sapiens	IN_VITRO
triprolidine	5282443	triprolidine inhibits Dendritic cell stimulated with IL3 and HIV compared to Dendritic cell stimulated with IL3	Dendritic cell	CL:0000451	Dendritic cell	CL:0000451	Dendritic cell	CL:0000451	Dendritic cell	CL:0000451	GSE10147_IL3_VS_IL3_AND_HIVP17_STIM_PDC		0.034009463	-99.42185752		APPROVED	histamine receptor antagonist	HRH1	3269	SIGNATURE_DOWN	Homo sapiens	EX_VIVO
triprolidine	5282443	triprolidine inhibits mature Dendritic cell compared to immature Dendritic cell	Dendritic cell	CL:0000451	Dendritic cell	CL:0000451	Dendritic cell	CL:0000451	Dendritic cell	CL:0000451	GSE9946_IMMATURE_VS_MATURE_STIMULATORY_DC		0.034009463	-99.44050727		APPROVED	histamine receptor antagonist	HRH1	3269	SIGNATURE_DOWN	Homo sapiens	EX_VIVO
triprolidine	5282443	triprolidine inhibits plasmacytoid Dendritic cell compared to myeloid Dendritic cell stimulated with Influenza vaccine	Dendritic cell	CL:0000451	Dendritic cell	CL:0000451	Dendritic cell	CL:0000451	Dendritic cell	CL:0000451	GSE29618_PRE_VS_DAY7_FLU_VACCINE_MDC	0.034009463		-99.45915703		APPROVED	histamine receptor antagonist	HRH1	3269	SIGNATURE_UP	Homo sapiens	UNKNOWN
triprolidine	5282443	triprolidine inhibits Dendritic cell compared to Dendritic cell stimulated with IL1	Dendritic cell	CL:0000451	Dendritic cell	CL:0000451	Dendritic cell	CL:0000451	Dendritic cell	CL:0000451	GSE53163_DC_treated_IL1_vs_DC_control		0.034009463	-99.49645655		APPROVED	histamine receptor antagonist	HRH1	3269	SIGNATURE_DOWN	Homo sapiens	UNKNOWN
triprolidine	5282443	triprolidine inhibits Dendritic cell compared to Dendritic cell stimulated with LPS	Dendritic cell	CL:0000451	Dendritic cell	CL:0000451	Dendritic cell	CL:0000451	Dendritic cell	CL:0000451	GSE14000_TRANSLATED_RNA_VS_MRNA_16H_LPS_DC	0.19508823		-99.53375606		APPROVED	histamine receptor antagonist	HRH1	3269	SIGNATURE_UP	Homo sapiens	EX_VIVO
triprolidine	5282443	triprolidine inhibits Dendritic cell compared to Dendritic cell stimulated with Newcastle virus	Dendritic cell	CL:0000451	Dendritic cell	CL:0000451	Dendritic cell	CL:0000451	Dendritic cell	CL:0000451	GSE18791_UNSTIM_VS_NEWCATSLE_VIRUS_DC_1H	0.030984548		-99.83215218		APPROVED	histamine receptor antagonist	HRH1	3269	SIGNATURE_UP	Homo sapiens	IN_VITRO
triprolidine	5282443	triprolidine inhibits plasmacytoid Dendritic cell compared to myeloid Dendritic cell stimulated with Influenza vaccine	Dendritic cell	CL:0000451	Dendritic cell	CL:0000451	Dendritic cell	CL:0000451	Dendritic cell	CL:0000451	GSE29618_PRE_VS_DAY7_FLU_VACCINE_MDC	0.160251046		-99.96270048		APPROVED	histamine receptor antagonist	HRH1	3269	SIGNATURE_UP	Homo sapiens	UNKNOWN
triprolidine	5282443	triprolidine inhibits Macrophage compared to Macrophage stimulated with CSF1 and Pam3Cys Stimulation	Macrophage	CL:0000235	Macrophage	CL:0000235	Macrophage	CL:0000235	Macrophage	CL:0000235	GSE11864_UNTREATED_VS_CSF1_PAM3CYS_IN_MAC	0.724364777	0.090405405	-95.10463378		APPROVED	histamine receptor antagonist	HRH1	3269	SIGNATURE	Homo sapiens	IN_VITRO
triprolidine	5282443	triprolidine inhibits Macrophage compared to Macrophage stimulated with IFNg and TNF	Macrophage	CL:0000235	Macrophage	CL:0000235	Macrophage	CL:0000235	Macrophage	CL:0000235	GSE16385_UNTREATED_VS_12H_IFNG_TNF_TREATED_MACROPHAGE	0.048801838	0.061556864	-95.25411061		APPROVED	histamine receptor antagonist	HRH1	3269	SIGNATURE	Homo sapiens	EX_VIVO
triprolidine	5282443	triprolidine inhibits Macrophage compared to Macrophage stimulated with CSF1 and Pam3Cys Stimulation	Macrophage	CL:0000235	Macrophage	CL:0000235	Macrophage	CL:0000235	Macrophage	CL:0000235	GSE11864_UNTREATED_VS_CSF1_PAM3CYS_IN_MAC	0.705224321	0.199201012	-95.59043348		APPROVED	histamine receptor antagonist	HRH1	3269	SIGNATURE	Homo sapiens	IN_VITRO
triprolidine	5282443	triprolidine inhibits Macrophage compared to Macrophage in Arthritis	Macrophage	CL:0000235	Macrophage	CL:0000235	Macrophage	CL:0000235	Macrophage	CL:0000235	GSE10500_ARTHRITIC_SYNOVIAL_FLUID_VS_HEALTHY_MACROPHAGE		0.330425727	-95.67325625		APPROVED	histamine receptor antagonist	HRH1	3269	SIGNATURE_DOWN	Homo sapiens	PATIENT
triprolidine	5282443	triprolidine inhibits Macrophage stimulated with Rosiglitazone compared to Macrophage stimulated with INFg and TNF	Macrophage	CL:0000235	Macrophage	CL:0000235	Macrophage	CL:0000235	Macrophage	CL:0000235	GSE16385_IFNG_TNF_VS_ROSIGLITAZONE_STIM_MACROPHAGE		0.061774194	-96.0462514		APPROVED	histamine receptor antagonist	HRH1	3269	SIGNATURE_DOWN	Homo sapiens	EX_VIVO
triprolidine	5282443	triprolidine inhibits T CD4+ memory compared to Macrophage	Macrophage	CL:0000235	Macrophage	CL:0000084	T cell	CL:0000235	T CD4+ memory	CL:0000897	GSE3982_MAC_VS_EFF_MEMORY_CD4_TCELL		0.034009463	-96.6616934		APPROVED	histamine receptor antagonist	HRH1	3269	SIGNATURE_DOWN	Homo sapiens	UNKNOWN
triprolidine	5282443	triprolidine inhibits Macrophage stimulated with IFNg compared to Macrophage	Macrophage	CL:0000235	Macrophage	CL:0000235	Macrophage	CL:0000235	Macrophage	CL:0000235	GSE1925_CTRL_VS_3H_IFNG_STIM_MACROPHAGE		0.19508823	-97.14658709		APPROVED	histamine receptor antagonist	HRH1	3269	SIGNATURE_DOWN	Homo sapiens	EX_VIVO
triprolidine	5282443	triprolidine inhibits Macrophage stimulated with MCSF compared to Macrophage stimulated with IFNa and MCSF	Macrophage	CL:0000235	Macrophage	CL:0000235	Macrophage	CL:0000235	Macrophage	CL:0000235	GSE1740_MCSF_VS_MCSF_AND_IFNG_DAY2_DERIVED_MACROPHAGE	0.214699853		-97.38903394		APPROVED	histamine receptor antagonist	HRH1	3269	SIGNATURE_UP	Homo sapiens	EX_VIVO
triprolidine	5282443	triprolidine inhibits Macrophage M2	Macrophage	CL:0000235	Macrophage M2	CL:0000235	Macrophage	CL:0000890	Macrophage M2	CL:0000890	Casseta_M2_like_genes	0.476747271		-97.57553152		APPROVED	histamine receptor antagonist	HRH1	3269	GENESET	Homo sapiens	UNKNOWN
triprolidine	5282443	triprolidine inhibits Macrophage compared to Macrophage stimulated with IFNg and TNF	Macrophage	CL:0000235	Macrophage	CL:0000235	Macrophage	CL:0000235	Macrophage	CL:0000235	GSE16385_UNTREATED_VS_12H_IFNG_TNF_TREATED_MACROPHAGE	0.035486198		-97.81797837		APPROVED	histamine receptor antagonist	HRH1	3269	SIGNATURE_UP	Homo sapiens	EX_VIVO
triprolidine	5282443	triprolidine inhibits Macrophage compared to Macrophage stimulated with CMYC Inhibitor	Macrophage	CL:0000235	Macrophage	CL:0000235	Macrophage	CL:0000235	Macrophage	CL:0000235	GSE32164_RESTING_DIFFERENTIATED_VS_CMYC_INHIBITED_MACROPHAGE	0.096136421	0.415924366	-98.0941704		APPROVED	histamine receptor antagonist	HRH1	3269	SIGNATURE	Homo sapiens	IN_VITRO
triprolidine	5282443	triprolidine inhibits Macrophage compared to Macrophage stimulated with Rosiglitazone	Macrophage	CL:0000235	Macrophage	CL:0000235	Macrophage	CL:0000235	Macrophage	CL:0000235	GSE16385_UNTREATED_VS_12H_ROSIGLITAZONE_TREATED_MACROPHAGE	0.030984548		-98.8996643		APPROVED	histamine receptor antagonist	HRH1	3269	SIGNATURE_UP	Homo sapiens	EX_VIVO
triprolidine	5282443	triprolidine inhibits Macrophage stimulated with MCSF compared to Macrophage stimulated with IFNa and MCSF	Macrophage	CL:0000235	Macrophage	CL:0000235	Macrophage	CL:0000235	Macrophage	CL:0000235	GSE1740_MCSF_VS_MCSF_AND_IFNG_DAY2_DERIVED_MACROPHAGE	0.034009463		-99.10481164		APPROVED	histamine receptor antagonist	HRH1	3269	SIGNATURE_UP	Homo sapiens	EX_VIVO
triprolidine	5282443	triprolidine inhibits Macrophage compared to Macrophage stimulated with Rosiglitazone	Macrophage	CL:0000235	Macrophage	CL:0000235	Macrophage	CL:0000235	Macrophage	CL:0000235	GSE16385_UNTREATED_VS_12H_ROSIGLITAZONE_TREATED_MACROPHAGE	0.035615601		-99.16076091		APPROVED	histamine receptor antagonist	HRH1	3269	SIGNATURE_UP	Homo sapiens	EX_VIVO
triprolidine	5282443	triprolidine inhibits Macrophage compared to Macrophage stimulated with IFNg and TNF	Macrophage	CL:0000235	Macrophage	CL:0000235	Macrophage	CL:0000235	Macrophage	CL:0000235	GSE16385_UNTREATED_VS_12H_IFNG_TNF_TREATED_MACROPHAGE	0.030984548		-99.30995897		APPROVED	histamine receptor antagonist	HRH1	3269	SIGNATURE_UP	Homo sapiens	EX_VIVO
triprolidine	5282443	triprolidine inhibits Macrophage	Macrophage	CL:0000235	Macrophage	CL:0000235	Macrophage	CL:0000235	Macrophage	CL:0000235	Casseta_TAM_Metagenes	0.129737839		-99.36590824		APPROVED	histamine receptor antagonist	HRH1	3269	GENESET	Homo sapiens	UNKNOWN
triprolidine	5282443	triprolidine inhibits Macrophage	Macrophage	CL:0000235	Macrophage	CL:0000235	Macrophage	CL:0000235	Macrophage	CL:0000235	Casseta_TAM_Metagenes	0.215116746		-99.94405073		APPROVED	histamine receptor antagonist	HRH1	3269	GENESET	Homo sapiens	UNKNOWN
triprolidine	5282443	triprolidine inhibits Macrophage stimulated with IL4 compared to Monocyte	Monocyte	CL:0000576	Monocyte	CL:0000235	Macrophage	CL:0000576	Macrophage	CL:0000235	GSE16385_MONOCYTE_VS_12H_IL4_TREATED_MACROPHAGE		0.030984548	-95.24431182		APPROVED	histamine receptor antagonist	HRH1	3269	SIGNATURE_DOWN	Homo sapiens	EX_VIVO
triprolidine	5282443	triprolidine inhibits Monocyte in Breast invasive carcinom compared to Monocyte	Monocyte	CL:0000576	Monocyte	CL:0000576	Monocyte	CL:0000576	Monocyte	CL:0000576	Casseta_NonClassicalActivated_Monocyte_BRCA_vs_healthy_monocyte	0.388776102		-95.63595673		APPROVED	histamine receptor antagonist	HRH1	3269	SIGNATURE_UP	Homo sapiens	PATIENT
triprolidine	5282443	triprolidine inhibits Monocyte compared to Monocyte stimulated with M. tuberculosis	Monocyte	CL:0000576	Monocyte	CL:0000576	Monocyte	CL:0000576	Monocyte	CL:0000576	GSE34156_UNTREATED_VS_6H_TLR1_TLR2_LIGAND_TREATED_MONOCYTE	0.155260043	0.636206449	-96.11360239		APPROVED	histamine receptor antagonist	HRH1	3269	SIGNATURE	Homo sapiens	IN_VITRO
triprolidine	5282443	triprolidine inhibits Monocyte stimulated with Muramyl Dipeptide and M. tuberculosis compared to Monocyte stimulated with M. tuberculosis	Monocyte	CL:0000576	Monocyte	CL:0000576	Monocyte	CL:0000576	Monocyte	CL:0000576	GSE34156_NOD2_LIGAND_VS_TLR1_TLR2_LIGAND_24H_TREATED_MONOCYTE	0.092554527		-96.90414025		APPROVED	histamine receptor antagonist	HRH1	3269	SIGNATURE_UP	Homo sapiens	IN_VITRO
triprolidine	5282443	triprolidine inhibits Monocyte stimulated with Muramyl Dipeptide and M. tuberculosis compared to Monocyte	Monocyte	CL:0000576	Monocyte	CL:0000576	Monocyte	CL:0000576	Monocyte	CL:0000576	GSE34156_UNTREATED_VS_24H_NOD2_AND_TLR1_TLR2_LIGAND_TREATED_MONOCYTE		0.05050153	-97.37038419		APPROVED	histamine receptor antagonist	HRH1	3269	SIGNATURE_DOWN	Homo sapiens	IN_VITRO
triprolidine	5282443	triprolidine inhibits Monocyte stimulated with LPS compared to Monocyte stimulated with LPS (low dose)	Monocyte	CL:0000576	Monocyte	CL:0000576	Monocyte	CL:0000576	Monocyte	CL:0000576	GSE9988_LPS_VS_LOW_LPS_MONOCYTE	0.319222904	0.954049773	-97.79521674		APPROVED	histamine receptor antagonist	HRH1	3269	SIGNATURE	Homo sapiens	EX_VIVO
triprolidine	5282443	triprolidine inhibits Monocyte compared to Monocyte stimulated with M. tuberculosis	Monocyte	CL:0000576	Monocyte	CL:0000576	Monocyte	CL:0000576	Monocyte	CL:0000576	GSE8921_3H_VS_24H_TLR1_2_STIM_MONOCYTE	0.188937303	0.121542444	-97.90732436		APPROVED	histamine receptor antagonist	HRH1	3269	SIGNATURE	Homo sapiens	IN_VITRO
triprolidine	5282443	triprolidine inhibits Monocyte stimulated with Muramyl Dipeptide and M. tuberculosis compared to Monocyte stimulated with M. tuberculosis	Monocyte	CL:0000576	Monocyte	CL:0000576	Monocyte	CL:0000576	Monocyte	CL:0000576	GSE34156_TLR1_TLR2_LIGAND_VS_NOD2_AND_TLR1_TLR2_LIGAND_6H_TREATED_MONOCYTE		0.030984548	-98.32152182		APPROVED	histamine receptor antagonist	HRH1	3269	SIGNATURE_DOWN	Homo sapiens	IN_VITRO
triprolidine	5282443	triprolidine inhibits Monocyte compared to Monocyte in Arthritis	Monocyte	CL:0000576	Monocyte	CL:0000576	Monocyte	CL:0000576	Monocyte	CL:0000576	GSE38351_RA_GPL96_Monocytes		0.030984548	-98.41477061		APPROVED	histamine receptor antagonist	HRH1	3269	SIGNATURE_DOWN	Homo sapiens	PATIENT
triprolidine	5282443	triprolidine inhibits Monocyte compared to Monocyte stimulated with M. tuberculosis	Monocyte	CL:0000576	Monocyte	CL:0000576	Monocyte	CL:0000576	Monocyte	CL:0000576	GSE34156_UNTREATED_VS_24H_TLR1_TLR2_LIGAND_TREATED_MONOCYTE	0.030984548		-98.47071988		APPROVED	histamine receptor antagonist	HRH1	3269	SIGNATURE_UP	Homo sapiens	IN_VITRO
triprolidine	5282443	triprolidine inhibits Neutrophil stimulated with HL60 lysate compared to Neutrophil stimulated with A.phagocytophilum	Neutrophil	CL:0000775	Neutrophil	CL:0000775	Neutrophil	CL:0000775	Neutrophil	CL:0000775	GSE2405_HEAT_KILLED_LYSATE_VS_LIVE_A_PHAGOCYTOPHILUM_STIM_NEUTROPHIL_9H	0.114751286	0.691096113	-95.88938714		APPROVED	histamine receptor antagonist	HRH1	3269	SIGNATURE	Homo sapiens	EX_VIVO
triprolidine	5282443	triprolidine inhibits Neutrophil compared to Neutrophil stimulated with A.phagocytophilum	Neutrophil	CL:0000775	Neutrophil	CL:0000775	Neutrophil	CL:0000775	Neutrophil	CL:0000775	GSE2405_0H_VS_9H_A_PHAGOCYTOPHILUM_STIM_NEUTROPHIL	0.996065928	0.050826211	-96.18834081		APPROVED	histamine receptor antagonist	HRH1	3269	SIGNATURE	Homo sapiens	EX_VIVO
triprolidine	5282443	triprolidine inhibits Neutrophil stimulated with A.phagocytophilum compared to Neutrophil stimulated with S.aureus	Neutrophil	CL:0000775	Neutrophil	CL:0000775	Neutrophil	CL:0000775	Neutrophil	CL:0000775	GSE2405_S_AUREUS_VS_A_PHAGOCYTOPHILUM_NEUTROPHIL		0.035486198	-96.307348		APPROVED	histamine receptor antagonist	HRH1	3269	SIGNATURE_DOWN	Homo sapiens	EX_VIVO
triprolidine	5282443	triprolidine inhibits Neutrophil stimulated with A.phagocytophilum compared to Neutrophil	Neutrophil	CL:0000775	Neutrophil	CL:0000775	Neutrophil	CL:0000775	Neutrophil	CL:0000775	GSE2405_0H_VS_3H_A_PHAGOCYTOPHILUM_STIM_NEUTROPHIL		0.035338158	-97.70607982		APPROVED	histamine receptor antagonist	HRH1	3269	SIGNATURE_DOWN	Homo sapiens	EX_VIVO
triprolidine	5282443	triprolidine inhibits Neutrophil compared to Neutrophil in Periodontitis	Neutrophil	CL:0000775	Neutrophil	CL:0000775	Neutrophil	CL:0000775	Neutrophil	CL:0000775	GSE12484_HEALTHY_VS_PERIDONTITIS_NEUTROPHILS	0.030984548		-98.93696382		APPROVED	histamine receptor antagonist	HRH1	3269	SIGNATURE_UP	Homo sapiens	PATIENT
triprolidine	5282443	triprolidine inhibits PBMC compared to PBMC stimulated with TIV Influenza vaccine	PBMC	CL:2000001	PBMC	CL:2000001	PBMC	CL:2000001	PBMC	CL:2000001	GSE29617_CTRL_VS_TIV_FLU_VACCINE_PBMC_2008	0.865029025	0.080182178	-95.06726457		APPROVED	histamine receptor antagonist	HRH1	3269	SIGNATURE	Homo sapiens	UNKNOWN
triprolidine	5282443	triprolidine inhibits PBMC stimulated with TIV Influenza vaccine compared to PBMC	PBMC	CL:2000001	PBMC	CL:2000001	PBMC	CL:2000001	PBMC	CL:2000001	GSE29614_CTRL_VS_DAY3_TIV_FLU_VACCINE_PBMC		0.083964923	-95.69190601		APPROVED	histamine receptor antagonist	HRH1	3269	SIGNATURE_DOWN	Homo sapiens	UNKNOWN
triprolidine	5282443	triprolidine inhibits PBMC stimulated with LAIV Influenza vaccine compared to PBMC	PBMC	CL:2000001	PBMC	CL:2000001	PBMC	CL:2000001	PBMC	CL:2000001	GSE29615_CTRL_VS_DAY7_LAIV_FLU_VACCINE_PBMC		0.10254743	-95.76650504		APPROVED	histamine receptor antagonist	HRH1	3269	SIGNATURE_DOWN	Homo sapiens	UNKNOWN
triprolidine	5282443	triprolidine inhibits PBMC compared to PBMC in Lupus erythematosus	PBMC	CL:2000001	PBMC	CL:2000001	PBMC	CL:2000001	PBMC	CL:2000001	GSE24706_SLE_GPL6884_PBMCs		0.04611878	-95.93435285		APPROVED	histamine receptor antagonist	HRH1	3269	SIGNATURE_DOWN	Homo sapiens	PATIENT
triprolidine	5282443	triprolidine inhibits PBMC stimulated with YF17D Vaccine (21 days) compared to PBMC stimulated with YF17D Vaccine (7 days)	PBMC	CL:2000001	PBMC	CL:2000001	PBMC	CL:2000001	PBMC	CL:2000001	GSE13485_DAY7_VS_DAY21_YF17D_VACCINE_PBMC		0.051517073	-96.19544946		APPROVED	histamine receptor antagonist	HRH1	3269	SIGNATURE_DOWN	Homo sapiens	PATIENT
triprolidine	5282443	triprolidine inhibits PBMC compared to PBMC in Diabetes	PBMC	CL:2000001	PBMC	CL:2000001	PBMC	CL:2000001	PBMC	CL:2000001	GSE11907_T1D_GPL96_PBMCs		0.034009463	-96.99738903		APPROVED	histamine receptor antagonist	HRH1	3269	SIGNATURE_DOWN	Homo sapiens	PATIENT
triprolidine	5282443	triprolidine inhibits PBMC stimulated with YF17D Vaccine compared to PBMC	PBMC	CL:2000001	PBMC	CL:2000001	PBMC	CL:2000001	PBMC	CL:2000001	GSE13485_CTRL_VS_DAY21_YF17D_VACCINE_PBMC		0.035659894	-97.68743006		APPROVED	histamine receptor antagonist	HRH1	3269	SIGNATURE_DOWN	Homo sapiens	PATIENT
triprolidine	5282443	triprolidine inhibits PBMC in Organ Transplant compared to PBMC stimulated with immunosuppressive therapy in Organ Transplant	PBMC	CL:2000001	PBMC	CL:2000001	PBMC	CL:2000001	PBMC	CL:2000001	GSE22229_UNTREATED_VS_IMMUNOSUPP_THERAPY_RENAL_TRANSPLANT_PATIENT_PBMC	0.030984548		-97.87392764		APPROVED	histamine receptor antagonist	HRH1	3269	SIGNATURE_UP	Homo sapiens	PATIENT
triprolidine	5282443	triprolidine inhibits Myeloid compared to Myeloid in Lupus erythematosus	PBMC	CL:2000001	Myeloid		Other	CL:0000763	Myeloid	CL:0000763	GSE10325_MYELOID_VS_LUPUS_MYELOID	0.030984548		-98.06042521		APPROVED	histamine receptor antagonist	HRH1	3269	SIGNATURE_UP	Homo sapiens	PATIENT
triprolidine	5282443	triprolidine inhibits PBMC stimulated with YF17D Vaccine compared to PBMC	PBMC	CL:2000001	PBMC	CL:2000001	PBMC	CL:2000001	PBMC	CL:2000001	GSE13485_CTRL_VS_DAY1_YF17D_VACCINE_PBMC		0.030984548	-98.22827303		APPROVED	histamine receptor antagonist	HRH1	3269	SIGNATURE_DOWN	Homo sapiens	PATIENT
triprolidine	5282443	triprolidine inhibits PBMC stimulated with YF17D Vaccine (21 days) compared to PBMC stimulated with YF17D Vaccine (3 days)	PBMC	CL:2000001	PBMC	CL:2000001	PBMC	CL:2000001	PBMC	CL:2000001	GSE13485_DAY3_VS_DAY21_YF17D_VACCINE_PBMC		0.030984548	-98.28422231		APPROVED	histamine receptor antagonist	HRH1	3269	SIGNATURE_DOWN	Homo sapiens	PATIENT
triprolidine	5282443	triprolidine inhibits PBMC compared to PBMC stimulated with IFNa	PBMC	CL:2000001	PBMC	CL:2000001	PBMC	CL:2000001	PBMC	CL:2000001	GSE14386_UNTREATED_VS_IFNA_TREATED_ACT_PBMC_MS_PATIENT	0.048801838	0.527498522	-98.31838565		APPROVED	histamine receptor antagonist	HRH1	3269	SIGNATURE	Homo sapiens	PATIENT
triprolidine	5282443	triprolidine inhibits PBMC stimulated with LAIV Influenza vaccine compared to PBMC	PBMC	CL:2000001	PBMC	CL:2000001	PBMC	CL:2000001	PBMC	CL:2000001	GSE29615_CTRL_VS_DAY7_LAIV_FLU_VACCINE_PBMC		0.030984548	-98.67586721		APPROVED	histamine receptor antagonist	HRH1	3269	SIGNATURE_DOWN	Homo sapiens	UNKNOWN
triprolidine	5282443	triprolidine inhibits PBMC compared to PBMC stimulated with gram positive/negative bacteria	PBMC	CL:2000001	PBMC	CL:2000001	PBMC	CL:2000001	PBMC	CL:2000001	GSE9960_HEALTHY_VS_GRAM_NEG_AND_POS_SEPSIS_PBMC	0.030984548		-98.88101455		APPROVED	histamine receptor antagonist	HRH1	3269	SIGNATURE_UP	Homo sapiens	PATIENT
triprolidine	5282443	triprolidine inhibits PBMC stimulated with LAIV Influenza vaccine compared to PBMC	PBMC	CL:2000001	PBMC	CL:2000001	PBMC	CL:2000001	PBMC	CL:2000001	GSE29615_CTRL_VS_LAIV_FLU_VACCINE_PBMC		0.030984548	-99.01156285		APPROVED	histamine receptor antagonist	HRH1	3269	SIGNATURE_DOWN	Homo sapiens	UNKNOWN
triprolidine	5282443	triprolidine inhibits Myeloid compared to Myeloid in Lupus erythematosus	PBMC	CL:2000001	Myeloid		Other	CL:0000763	Myeloid	CL:0000763	GSE10325_MYELOID_VS_LUPUS_MYELOID	0.034009463		-99.04886236		APPROVED	histamine receptor antagonist	HRH1	3269	SIGNATURE_UP	Homo sapiens	PATIENT
triprolidine	5282443	triprolidine inhibits PBMC compared to PBMC stimulated with IFNa	PBMC	CL:2000001	PBMC	CL:2000001	PBMC	CL:2000001	PBMC	CL:2000001	GSE14386_UNTREATED_VS_IFNA_TREATED_ACT_PBMC_MS_PATIENT	0.030984548		-99.42185752		APPROVED	histamine receptor antagonist	HRH1	3269	SIGNATURE_UP	Homo sapiens	PATIENT
triprolidine	5282443	triprolidine inhibits PBMC compared to PBMC in Lupus erythematosus	PBMC	CL:2000001	PBMC	CL:2000001	PBMC	CL:2000001	PBMC	CL:2000001	GSE11907_SLE_GPL96_PBMCs		0.160251046	-99.49645655		APPROVED	histamine receptor antagonist	HRH1	3269	SIGNATURE_DOWN	Homo sapiens	PATIENT
triprolidine	5282443	triprolidine inhibits PBMC stimulated with LAIV Influenza vaccine compared to PBMC	PBMC	CL:2000001	PBMC	CL:2000001	PBMC	CL:2000001	PBMC	CL:2000001	GSE29615_CTRL_VS_LAIV_FLU_VACCINE_PBMC		0.035486198	-99.68295412		APPROVED	histamine receptor antagonist	HRH1	3269	SIGNATURE_DOWN	Homo sapiens	UNKNOWN
triprolidine	5282443	triprolidine inhibits PBMC compared to PBMC in Diabetes	PBMC	CL:2000001	PBMC	CL:2000001	PBMC	CL:2000001	PBMC	CL:2000001	GSE11907_T1D_GPL96_PBMCs		0.160251046	-99.79485267		APPROVED	histamine receptor antagonist	HRH1	3269	SIGNATURE_DOWN	Homo sapiens	PATIENT
triprolidine	5282443	triprolidine inhibits PBMC compared to PBMC in Arthritis	PBMC	CL:2000001	PBMC	CL:2000001	PBMC	CL:2000001	PBMC	CL:2000001	GSE90081_RA_GPL11154_PBMCs		0.030984548	-99.96270048		APPROVED	histamine receptor antagonist	HRH1	3269	SIGNATURE_DOWN	Homo sapiens	PATIENT
triprolidine	5282443	triprolidine inhibits T CD4+ naïve compared to NK cell	T cell	CL:0000084	T CD4+ naïve	CL:0000623	NK cell	CL:0000895	NK cell	CL:0000623	GSE22886_NAIVE_CD4_TCELL_VS_NKCELL	0.034753414		-95.37486013		APPROVED	histamine receptor antagonist	HRH1	3269	SIGNATURE_UP	Homo sapiens	IN_SILICO
triprolidine	5282443	triprolidine inhibits T CD4+ naïve compared to T helper 1 stimulated with IFNa	T cell	CL:0000084	T CD4+ naïve	CL:0000084	T cell	CL:0000895	T helper 1	CL:0000545	GSE20198_UNTREATED_VS_IFNA_TREATED_ACT_CD4_TCELL	0.521354808	0.029998318	-95.44095665		APPROVED	histamine receptor antagonist	HRH1	3269	SIGNATURE	Homo sapiens	IN_VITRO
triprolidine	5282443	triprolidine inhibits T CD4+ memory compared to PBMC	T cell	CL:0000084	T CD4+ memory	CL:2000001	PBMC	CL:0000897	PBMC	CL:2000001	GSE11057_CD4_CENT_MEM_VS_PBMC	0.050448077		-95.44945916		APPROVED	histamine receptor antagonist	HRH1	3269	SIGNATURE_UP	Homo sapiens	IN_VIVO
triprolidine	5282443	triprolidine inhibits T CD4+ stimulated with cultured (0 hours) compared to T CD4+ stimulated with cultured (72 hours)	T cell	CL:0000084	T CD4+	CL:0000084	T cell	CL:0000624	T CD4+	CL:0000624	GSE17974_0H_VS_72H_IN_VITRO_ACT_CD4_TCELL	0.219857076		-95.46810891		APPROVED	histamine receptor antagonist	HRH1	3269	SIGNATURE_UP	Homo sapiens	EX_VIVO
triprolidine	5282443	triprolidine inhibits T helper stimulated with IL4, anti-CD3 and anti-CD28 compared to T helper stimulated with IL12, anti-CD3 and anti-CD28	T cell	CL:0000084	T helper	CL:0000084	T cell	CL:0000492	T helper	CL:0000492	GSE2770_IL12_VS_IL4_TREATED_ACT_CD4_TCELL_2H		0.117652373	-95.54270794		APPROVED	histamine receptor antagonist	HRH1	3269	SIGNATURE_DOWN	Homo sapiens	EX_VIVO
triprolidine	5282443	triprolidine inhibits T CD4+ naïve compared to T helper 1	T cell	CL:0000084	T CD4+ naïve	CL:0000084	T cell	CL:0000895	T helper 1	CL:0000545	GSE22886_NAIVE_CD4_TCELL_VS_48H_ACT_TH1	0.108288268	0.050826211	-95.73991031		APPROVED	histamine receptor antagonist	HRH1	3269	SIGNATURE	Homo sapiens	IN_SILICO
triprolidine	5282443	triprolidine inhibits T CD8+ stimulated with TGFB compared to T CD8+	T cell	CL:0000084	T CD8+	CL:0000084	T cell	CL:0002437	T CD8+	CL:0002437	GSE7460_CTRL_VS_TGFB_TREATED_ACT_CD8_TCELL		0.237684329	-95.76650504		APPROVED	histamine receptor antagonist	HRH1	3269	SIGNATURE_DOWN	Homo sapiens	EX_VIVO
triprolidine	5282443	triprolidine inhibits T CD4+ naïve compared to T CD8+ naïve	T cell	CL:0000084	T CD8+ naïve	CL:0000084	T cell	CL:0000898	T CD4+ naïve	CL:0000895	GSE22886_CD8_VS_CD4_NAIVE_TCELL		0.030984548	-96.00895188		APPROVED	histamine receptor antagonist	HRH1	3269	SIGNATURE_DOWN	Homo sapiens	IN_SILICO
triprolidine	5282443	triprolidine inhibits T CD4+ naïve compared to NK cell	T cell	CL:0000084	T CD4+ naïve	CL:0000623	NK cell	CL:0000895	NK cell	CL:0000623	GSE22886_NAIVE_CD4_TCELL_VS_NKCELL	0.048801838	0.048992146	-96.1509716		APPROVED	histamine receptor antagonist	HRH1	3269	SIGNATURE	Homo sapiens	IN_SILICO
triprolidine	5282443	triprolidine inhibits T helper 1 compared to T helper 2	T cell	CL:0000084	T helper 1	CL:0000084	T cell	CL:0000545	T helper 2	CL:0000546	GSE22886_TH1_VS_TH2_48H_ACT	0.034009463		-96.32599776		APPROVED	histamine receptor antagonist	HRH1	3269	SIGNATURE_UP	Homo sapiens	IN_SILICO
triprolidine	5282443	triprolidine inhibits T helper 17 compared to T helper 17	T cell	CL:0000084	T helper 17	CL:0000084	T cell	CL:0000899	T helper 17	CL:0000899	GSE32901_TH17_EMRICHED_VS_TH17_NEG_CD4_TCELL	0.116851519		-96.40059679		APPROVED	histamine receptor antagonist	HRH1	3269	SIGNATURE_UP	Homo sapiens	IN_VITRO
triprolidine	5282443	triprolidine inhibits T CD4+ stimulated with cultured (0 hours) compared to T CD4+ stimulated with cultured (30 min)	T cell	CL:0000084	T CD4+	CL:0000084	T cell	CL:0000624	T CD4+	CL:0000624	GSE17974_0H_VS_0.5H_IN_VITRO_ACT_CD4_TCELL	0.064153431	0.076286262	-96.41255605		APPROVED	histamine receptor antagonist	HRH1	3269	SIGNATURE	Homo sapiens	EX_VIVO
triprolidine	5282443	triprolidine inhibits T helper 17 compared to T helper 1	T cell	CL:0000084	T helper 1	CL:0000084	T cell	CL:0000545	T helper 17	CL:0000899	GSE32901_TH1_VS_TH17_NEG_CD4_TCELL		0.350732601	-96.43789631		APPROVED	histamine receptor antagonist	HRH1	3269	SIGNATURE_DOWN	Homo sapiens	IN_VITRO
triprolidine	5282443	triprolidine inhibits T CD8+ naïve compared to PD-1 (high) T CD8+	T cell	CL:0000084	T CD8+ naïve	CL:0000084	T cell	CL:0000898	T CD8+	CL:0002437	GSE26495_NAIVE_VS_PD1HIGH_CD8_TCELL	0.061218257		-96.49384558		APPROVED	histamine receptor antagonist	HRH1	3269	SIGNATURE_UP	Homo sapiens	IN_VIVO
triprolidine	5282443	triprolidine inhibits T helper 17 compared to T helper 17	T cell	CL:0000084	T helper 17	CL:0000084	T cell	CL:0000899	T helper 17	CL:0000899	GSE32901_TH17_EMRICHED_VS_TH17_NEG_CD4_TCELL	0.385358024		-96.49384558		APPROVED	histamine receptor antagonist	HRH1	3269	SIGNATURE_UP	Homo sapiens	IN_VITRO
triprolidine	5282443	triprolidine inhibits stem T CD8+ memory compared to effector T CD8+ memory	T cell	CL:0000084	T CD8+ memory	CL:0000084	T cell	CL:0000909	T CD8+ memory	CL:0000909	GSE23321_CD8_STEM_CELL_MEMORY_VS_EFFECTOR_MEMORY_CD8_TCELL	0.666044765	0.114167719	-96.6367713		APPROVED	histamine receptor antagonist	HRH1	3269	SIGNATURE	Homo sapiens	IN_VIVO
triprolidine	5282443	triprolidine inhibits T CD4+ in atopic skin compared to T CD4+	T cell	CL:0000084	T CD4+	CL:0000084	T cell	CL:0000624	T CD4+	CL:0000624	GSE14908_ATOPIC_VS_NONATOPIC_PATIENT_RESTING_CD4_TCELL	0.504736357	0.299395838	-96.67414051		APPROVED	histamine receptor antagonist	HRH1	3269	SIGNATURE	Homo sapiens	PATIENT
triprolidine	5282443	triprolidine inhibits T CD4+ compared to T CD4+ stimulated with IL4 and anti-IL12	T cell	CL:0000084	T CD4+	CL:0000084	T cell	CL:0000624	T CD4+	CL:0000624	GSE17974_CTRL_VS_ACT_IL4_AND_ANTI_IL12_0.5H_CD4_TCELL	0.074339823	0.068595158	-96.74887892		APPROVED	histamine receptor antagonist	HRH1	3269	SIGNATURE	Homo sapiens	EX_VIVO
triprolidine	5282443	triprolidine inhibits T CD4+ compared to T CD4+ stimulated with IL4 and anti-IL12	T cell	CL:0000084	T CD4+	CL:0000084	T cell	CL:0000624	T CD4+	CL:0000624	GSE17974_IL4_AND_ANTI_IL12_VS_UNTREATED_72H_ACT_CD4_TCELL		0.214699853	-96.82954122		APPROVED	histamine receptor antagonist	HRH1	3269	SIGNATURE_DOWN	Homo sapiens	EX_VIVO
triprolidine	5282443	triprolidine inhibits T cell compared to T cell	T cell	CL:0000084	T cell	CL:0000084	T cell	CL:0000084	T cell	CL:0000084	GSE22886_UNSTIM_VS_STIM_MEMORY_TCELL	0.816528392	0.050826211	-96.93572496		APPROVED	histamine receptor antagonist	HRH1	3269	SIGNATURE	Homo sapiens	IN_SILICO
triprolidine	5282443	triprolidine inhibits old T CD4+ memory compared to young T CD4+ memory	T cell	CL:0000084	T CD4+ memory	CL:0000084	T cell	CL:0000897	T CD4+ memory	CL:0000897	GSE36476_YOUNG_VS_OLD_DONOR_MEMORY_CD4_TCELL		0.19508823	-96.94143976		APPROVED	histamine receptor antagonist	HRH1	3269	SIGNATURE_DOWN	Homo sapiens	EX_VIVO
triprolidine	5282443	triprolidine inhibits T regulatory compared to T cell stimulated with FOXP3 overexpression	T cell	CL:0000084	T regulatory	CL:0000084	T cell	CL:0000815	T cell	CL:0000084	GSE7460_CTRL_VS_FOXP3_OVEREXPR_TCONV	0.050448077		-97.09063782		APPROVED	histamine receptor antagonist	HRH1	3269	SIGNATURE_UP	Homo sapiens	EX_VIVO
triprolidine	5282443	triprolidine inhibits T CD8+ naïve compared to central T CD8+ memory	T cell	CL:0000084	T CD8+ memory	CL:0000084	T cell	CL:0000909	T CD8+ naïve	CL:0000898	GSE23321_CENTRAL_MEMORY_VS_NAIVE_CD8_TCELL		0.034009463	-97.16523685		APPROVED	histamine receptor antagonist	HRH1	3269	SIGNATURE_DOWN	Homo sapiens	IN_VIVO
triprolidine	5282443	triprolidine inhibits T cell gamma/delta compared to T cell gamma/delta stimulated with BrHPP and IL2	T cell	CL:0000084	T cell gamma/delta	CL:0000084	T cell	CL:0000798	T cell gamma/delta	CL:0000798	GSE27291_0H_VS_7D_STIM_GAMMADELTA_TCELL	0.302618347	0.807233108	-97.23467862		APPROVED	histamine receptor antagonist	HRH1	3269	SIGNATURE	Homo sapiens	IN_VITRO
triprolidine	5282443	triprolidine inhibits old T CD4+ memory compared to young T CD4+ memory	T cell	CL:0000084	T CD4+ memory	CL:0000084	T cell	CL:0000897	T CD4+ memory	CL:0000897	GSE36476_YOUNG_VS_OLD_DONOR_MEMORY_CD4_TCELL		0.034009463	-97.25848564		APPROVED	histamine receptor antagonist	HRH1	3269	SIGNATURE_DOWN	Homo sapiens	EX_VIVO
triprolidine	5282443	triprolidine inhibits T CD4+ naïve compared to T helper 1	T cell	CL:0000084	T CD4+ naïve	CL:0000084	T cell	CL:0000895	T helper 1	CL:0000545	GSE22886_NAIVE_CD4_TCELL_VS_48H_ACT_TH1	0.061587324	0.029998318	-97.30941704		APPROVED	histamine receptor antagonist	HRH1	3269	SIGNATURE	Homo sapiens	IN_SILICO
triprolidine	5282443	triprolidine inhibits T CD8+ naïve compared to PD-1 (high) T CD8+	T cell	CL:0000084	T CD8+ naïve	CL:0000084	T cell	CL:0000898	T CD8+	CL:0002437	GSE26495_NAIVE_VS_PD1HIGH_CD8_TCELL	0.214699853		-97.33308467		APPROVED	histamine receptor antagonist	HRH1	3269	SIGNATURE_UP	Homo sapiens	IN_VIVO
triprolidine	5282443	triprolidine inhibits T CD4+ memory compared to T helper 2	T cell	CL:0000084	T CD4+ memory	CL:0000084	T cell	CL:0000897	T helper 2	CL:0000546	GSE3982_MEMORY_CD4_TCELL_VS_TH2	0.26029798	0.029998318	-97.34678625		APPROVED	histamine receptor antagonist	HRH1	3269	SIGNATURE	Homo sapiens	UNKNOWN
triprolidine	5282443	triprolidine inhibits T CD4+ naïve compared to T helper 1	T cell	CL:0000084	T CD4+ naïve	CL:0000084	T cell	CL:0000895	T helper 1	CL:0000545	GSE22886_NAIVE_CD4_TCELL_VS_12H_ACT_TH1	0.211499704	0.029998318	-97.42152466		APPROVED	histamine receptor antagonist	HRH1	3269	SIGNATURE	Homo sapiens	IN_SILICO
triprolidine	5282443	triprolidine inhibits T regulatory compared to T cell	T cell	CL:0000084	T cell	CL:0000084	T cell	CL:0000084	T regulatory	CL:0000815	GSE7460_TCONV_VS_TREG_LN		0.214699853	-97.51958225		APPROVED	histamine receptor antagonist	HRH1	3269	SIGNATURE_DOWN	Homo sapiens	EX_VIVO
triprolidine	5282443	triprolidine inhibits T CD4+ stimulated with cultured (0 hours) compared to T CD4+ stimulated with cultured (30 min)	T cell	CL:0000084	T CD4+	CL:0000084	T cell	CL:0000624	T CD4+	CL:0000624	GSE17974_0H_VS_0.5H_IN_VITRO_ACT_CD4_TCELL	0.030984548		-97.63148079		APPROVED	histamine receptor antagonist	HRH1	3269	SIGNATURE_UP	Homo sapiens	EX_VIVO
triprolidine	5282443	triprolidine inhibits T CD4+ memory compared to T helper 1	T cell	CL:0000084	T CD4+ memory	CL:0000084	T cell	CL:0000897	T helper 1	CL:0000545	GSE3982_CENT_MEMORY_CD4_TCELL_VS_TH1	0.034009463		-97.74337934		APPROVED	histamine receptor antagonist	HRH1	3269	SIGNATURE_UP	Homo sapiens	UNKNOWN
triprolidine	5282443	triprolidine inhibits T regulatory compared to T regulatory in Colorectal cancer	T cell	CL:0000084	T regulatory	CL:0000084	T cell	CL:0000815	T regulatory	CL:0000815	Treg_Tumor_CRC_Adenocarcinoma_vs_Treg_Healthy_Tissue_CRC_Adenocarcinoma		0.160251046	-97.79932861		APPROVED	histamine receptor antagonist	HRH1	3269	SIGNATURE_DOWN	Homo sapiens	UNKNOWN
triprolidine	5282443	triprolidine inhibits stem T CD8+ memory compared to effector T CD8+ memory	T cell	CL:0000084	T CD8+ memory	CL:0000084	T cell	CL:0000909	T CD8+ memory	CL:0000909	GSE23321_CD8_STEM_CELL_MEMORY_VS_EFFECTOR_MEMORY_CD8_TCELL	0.3977433	0.415956207	-97.83258595		APPROVED	histamine receptor antagonist	HRH1	3269	SIGNATURE	Homo sapiens	IN_VIVO
triprolidine	5282443	triprolidine inhibits T CD8+ naïve compared to PD-1 (low) T CD8+	T cell	CL:0000084	T CD8+ naïve	CL:0000084	T cell	CL:0000898	T CD8+	CL:0002437	GSE26495_NAIVE_VS_PD1LOW_CD8_TCELL	0.035486198		-97.87392764		APPROVED	histamine receptor antagonist	HRH1	3269	SIGNATURE_UP	Homo sapiens	IN_VIVO
triprolidine	5282443	triprolidine inhibits T helper stimulated with IL12, TGFB, anti-CD3 and anti-CD28 compared to T helper	T cell	CL:0000084	T helper	CL:0000084	T cell	CL:0000492	T helper	CL:0000492	GSE2770_IL12_AND_TGFB_ACT_VS_ACT_CD4_TCELL_6H	0.048801838	0.029998318	-98.01943199		APPROVED	histamine receptor antagonist	HRH1	3269	SIGNATURE	Homo sapiens	EX_VIVO
triprolidine	5282443	triprolidine inhibits T CD4+ stimulated with TGFB compared to T CD4+	T cell	CL:0000084	T CD4+	CL:0000084	T cell	CL:0000624	T CD4+	CL:0000624	GSE22025_UNTREATED_VS_TGFB1_TREATED_CD4_TCELL		0.030984548	-98.09772473		APPROVED	histamine receptor antagonist	HRH1	3269	SIGNATURE_DOWN	Homo sapiens	IN_VITRO
triprolidine	5282443	triprolidine inhibits T helper 1 compared to T helper 2	T cell	CL:0000084	T helper 1	CL:0000084	T cell	CL:0000545	T helper 2	CL:0000546	GSE22886_TH1_VS_TH2_48H_ACT	0.030984548		-98.19097352		APPROVED	histamine receptor antagonist	HRH1	3269	SIGNATURE_UP	Homo sapiens	IN_SILICO
triprolidine	5282443	triprolidine inhibits T CD4+ naïve compared to NK cell	T cell	CL:0000084	T CD4+ naïve	CL:0000623	NK cell	CL:0000895	NK cell	CL:0000623	GSE22886_NAIVE_CD4_TCELL_VS_NKCELL	0.030984548		-98.26557255		APPROVED	histamine receptor antagonist	HRH1	3269	SIGNATURE_UP	Homo sapiens	IN_SILICO
triprolidine	5282443	triprolidine inhibits T helper stimulated with IL12, TGFB, anti-CD3 and anti-CD28 compared to T helper	T cell	CL:0000084	T helper	CL:0000084	T cell	CL:0000492	T helper	CL:0000492	GSE2770_IL12_AND_TGFB_ACT_VS_ACT_CD4_TCELL_6H	0.030984548		-98.30287206		APPROVED	histamine receptor antagonist	HRH1	3269	SIGNATURE_UP	Homo sapiens	EX_VIVO
triprolidine	5282443	triprolidine inhibits T CD4+ stimulated with cultured (0 hours) compared to T CD4+ stimulated with cultured (1 hour)	T cell	CL:0000084	T CD4+	CL:0000084	T cell	CL:0000624	T CD4+	CL:0000624	GSE17974_0H_VS_1H_IN_VITRO_ACT_CD4_TCELL	0.184018704	0.029998318	-98.35575486		APPROVED	histamine receptor antagonist	HRH1	3269	SIGNATURE	Homo sapiens	EX_VIVO
triprolidine	5282443	triprolidine inhibits T CD4+ compared to T CD4+ stimulated with IL4 and anti-IL12	T cell	CL:0000084	T CD4+	CL:0000084	T cell	CL:0000624	T CD4+	CL:0000624	GSE17974_CTRL_VS_ACT_IL4_AND_ANTI_IL12_2H_CD4_TCELL	0.484121727	0.050826211	-98.35575486		APPROVED	histamine receptor antagonist	HRH1	3269	SIGNATURE	Homo sapiens	EX_VIVO
triprolidine	5282443	triprolidine inhibits T CD4+ in Arthritis compared to T CD4+	T cell	CL:0000084	T CD4+	CL:0000084	T cell	CL:0000624	T CD4+	CL:0000624	GSE56649_RA_GPL570_T_cells	0.214699853		-98.35882134		APPROVED	histamine receptor antagonist	HRH1	3269	SIGNATURE_UP	Homo sapiens	PATIENT
triprolidine	5282443	triprolidine inhibits fetal T regulatory compared to fetal T cell	T cell	CL:0000084	T regulatory	CL:0000084	T cell	CL:0000815	T cell	CL:0000084	GSE25087_TREG_VS_TCONV_FETUS	0.178471389	0.400932967	-98.39312407		APPROVED	histamine receptor antagonist	HRH1	3269	SIGNATURE	Homo sapiens	EX_VIVO
triprolidine	5282443	triprolidine inhibits T helper stimulated with IL4, anti-CD3 and anti-CD28 compared to T helper stimulated with IL12, TGFB, anti-CD3 and anti-CD28	T cell	CL:0000084	T helper	CL:0000084	T cell	CL:0000492	T helper	CL:0000492	GSE2770_IL12_AND_TGFB_VS_IL4_TREATED_ACT_CD4_TCELL_6H		0.035338158	-98.43342037		APPROVED	histamine receptor antagonist	HRH1	3269	SIGNATURE_DOWN	Homo sapiens	EX_VIVO
triprolidine	5282443	triprolidine inhibits T CD4+ compared to T CD4+ stimulated with IL4 and anti-IL12	T cell	CL:0000084	T CD4+	CL:0000084	T cell	CL:0000624	T CD4+	CL:0000624	GSE17974_CTRL_VS_ACT_IL4_AND_ANTI_IL12_0.5H_CD4_TCELL	0.030984548		-98.45207012		APPROVED	histamine receptor antagonist	HRH1	3269	SIGNATURE_UP	Homo sapiens	EX_VIVO
triprolidine	5282443	triprolidine inhibits T CD8+ stimulated with IFNa2, anti-CD3 and anti-CD28 compared to T CD8+ stimulated with IFNa2	T cell	CL:0000084	T CD8+	CL:0000084	T cell	CL:0002437	T CD8+	CL:0002437	GSE17301_IFNA2_VS_IFNA2_AND_ACD3_ACD28_STIM_CD8_TCELL		0.160251046	-98.54531891		APPROVED	histamine receptor antagonist	HRH1	3269	SIGNATURE_DOWN	Homo sapiens	IN_VITRO
triprolidine	5282443	triprolidine inhibits T regulatory compared to T regulatory in Colorectal cancer	T cell	CL:0000084	T regulatory	CL:0000084	T cell	CL:0000815	T regulatory	CL:0000815	Treg_Tumor_CRC_Adenocarcinoma_vs_Treg_Healthy_Tissue_CRC_Adenocarcinoma		0.034009463	-98.58261843		APPROVED	histamine receptor antagonist	HRH1	3269	SIGNATURE_DOWN	Homo sapiens	UNKNOWN
triprolidine	5282443	triprolidine inhibits T CD8+ stimulated with INFa2 compared to T CD8+	T cell	CL:0000084	T CD8+	CL:0000084	T cell	CL:0002437	T CD8+	CL:0002437	GSE17301_CTRL_VS_48H_IFNA2_STIM_CD8_TCELL		0.030984548	-98.65721746		APPROVED	histamine receptor antagonist	HRH1	3269	SIGNATURE_DOWN	Homo sapiens	IN_VITRO
triprolidine	5282443	triprolidine inhibits B cell compared to T CD4+	T cell	CL:0000084	T CD4+	CL:0000236	B cell	CL:0000624	B cell	CL:0000236	GSE10325_CD4_TCELL_VS_BCELL		0.034009463	-98.71316673		APPROVED	histamine receptor antagonist	HRH1	3269	SIGNATURE_DOWN	Homo sapiens	IN_VIVO
triprolidine	5282443	triprolidine inhibits B cell compared to T CD4+	T cell	CL:0000084	T CD4+	CL:0000236	B cell	CL:0000624	B cell	CL:0000236	GSE10325_CD4_TCELL_VS_BCELL		0.030984548	-98.769116		APPROVED	histamine receptor antagonist	HRH1	3269	SIGNATURE_DOWN	Homo sapiens	IN_VIVO
triprolidine	5282443	triprolidine inhibits T CD4+ compared to T CD4+ stimulated with IL4 and anti-IL12	T cell	CL:0000084	T CD4+	CL:0000084	T cell	CL:0000624	T CD4+	CL:0000624	GSE17974_IL4_AND_ANTI_IL12_VS_UNTREATED_0.5H_ACT_CD4_TCELL		0.030984548	-98.78776576		APPROVED	histamine receptor antagonist	HRH1	3269	SIGNATURE_DOWN	Homo sapiens	EX_VIVO
triprolidine	5282443	triprolidine inhibits T helper 17 compared to T helper 17	T cell	CL:0000084	T helper 17	CL:0000084	T cell	CL:0000899	T helper 17	CL:0000899	GSE32901_TH17_EMRICHED_VS_TH17_NEG_CD4_TCELL	0.087106731		-98.78776576		APPROVED	histamine receptor antagonist	HRH1	3269	SIGNATURE_UP	Homo sapiens	IN_VITRO
triprolidine	5282443	triprolidine inhibits T helper stimulated with IL12, TGFB, anti-CD3 and anti-CD28 compared to T helper stimulated with anti-CD3 and anti-CD28	T cell	CL:0000084	T helper	CL:0000084	T cell	CL:0000492	T helper	CL:0000492	GSE2770_IL12_AND_TGFB_ACT_VS_ACT_CD4_TCELL_48H	0.763459329	0.050826211	-99.14050822		APPROVED	histamine receptor antagonist	HRH1	3269	SIGNATURE	Homo sapiens	EX_VIVO
triprolidine	5282443	triprolidine inhibits B cell compared to T cell	T cell	CL:0000084	T cell	CL:0000236	B cell	CL:0000084	B cell	CL:0000236	GSE22886_TCELL_VS_BCELL_NAIVE		0.034009463	-99.19806043		APPROVED	histamine receptor antagonist	HRH1	3269	SIGNATURE_DOWN	Homo sapiens	IN_SILICO
triprolidine	5282443	triprolidine inhibits CD25- T cell stimulated with IL4 compared to CD25+ T regulatory stimulated with IL4	T cell	CL:0000084	T regulatory	CL:0000084	T cell	CL:0000815	T cell	CL:0000084	GSE24634_TREG_VS_TCONV_POST_DAY7_IL4_CONVERSION		0.160251046	-99.2540097		APPROVED	histamine receptor antagonist	HRH1	3269	SIGNATURE_DOWN	Homo sapiens	EX_VIVO
triprolidine	5282443	triprolidine inhibits B cell naïve compared to T CD8+ naïve	T cell	CL:0000084	T CD8+ naïve	CL:0000236	B cell	CL:0000898	B cell naïve	CL:0000788	GSE22886_CD8_TCELL_VS_BCELL_NAIVE		0.160251046	-99.29130921		APPROVED	histamine receptor antagonist	HRH1	3269	SIGNATURE_DOWN	Homo sapiens	IN_SILICO
triprolidine	5282443	triprolidine inhibits T CD8+ naïve compared to central T CD8+ memory	T cell	CL:0000084	T CD8+ memory	CL:0000084	T cell	CL:0000909	T CD8+ naïve	CL:0000898	GSE23321_CENTRAL_MEMORY_VS_NAIVE_CD8_TCELL		0.030984548	-99.44050727		APPROVED	histamine receptor antagonist	HRH1	3269	SIGNATURE_DOWN	Homo sapiens	IN_VIVO
triprolidine	5282443	triprolidine inhibits B cell compared to T cell	T cell	CL:0000084	T cell	CL:0000236	B cell	CL:0000084	B cell	CL:0000236	GSE22886_TCELL_VS_BCELL_NAIVE		0.160251046	-99.58970533		APPROVED	histamine receptor antagonist	HRH1	3269	SIGNATURE_DOWN	Homo sapiens	IN_SILICO
triprolidine	5282443	triprolidine inhibits B cell naïve compared to T CD4+ naïve	T cell	CL:0000084	T CD4+ naïve	CL:0000236	B cell	CL:0000895	B cell naïve	CL:0000788	GSE22886_CD4_TCELL_VS_BCELL_NAIVE		0.160251046	-99.60835509		APPROVED	histamine receptor antagonist	HRH1	3269	SIGNATURE_DOWN	Homo sapiens	IN_SILICO
triprolidine	5282443	triprolidine inhibits B cell naïve compared to T CD8+ naïve	T cell	CL:0000084	T CD8+ naïve	CL:0000236	B cell	CL:0000898	B cell naïve	CL:0000788	GSE22886_CD8_TCELL_VS_BCELL_NAIVE		0.034009463	-99.64565461		APPROVED	histamine receptor antagonist	HRH1	3269	SIGNATURE_DOWN	Homo sapiens	IN_SILICO
triprolidine	5282443	triprolidine inhibits T helper stimulated with IL12, TGFB, anti-CD3 and anti-CD28 compared to T helper stimulated with anti-CD3 and anti-CD28	T cell	CL:0000084	T helper	CL:0000084	T cell	CL:0000492	T helper	CL:0000492	GSE2770_IL12_AND_TGFB_ACT_VS_ACT_CD4_TCELL_48H	0.474547462	0.029998318	-99.81315396		APPROVED	histamine receptor antagonist	HRH1	3269	SIGNATURE	Homo sapiens	EX_VIVO
triprolidine	5282443	triprolidine inhibits T CD4+ stimulated with IL4 and anti-IL12 compared to T CD4+	T cell	CL:0000084	T CD4+	CL:0000084	T cell	CL:0000624	T CD4+	CL:0000624	GSE17974_CTRL_VS_ACT_IL4_AND_ANTI_IL12_0.5H_CD4_TCELL		0.160251046	-99.85080194		APPROVED	histamine receptor antagonist	HRH1	3269	SIGNATURE_DOWN	Homo sapiens	EX_VIVO
triprolidine	5282443	triprolidine inhibits T CD4+ compared to T CD4+ stimulated with IL4 and anti-IL12	T cell	CL:0000084	T CD4+	CL:0000084	T cell	CL:0000624	T CD4+	CL:0000624	GSE17974_CTRL_VS_ACT_IL4_AND_ANTI_IL12_2H_CD4_TCELL	0.105367605	0.029998318	-99.92526158		APPROVED	histamine receptor antagonist	HRH1	3269	SIGNATURE	Homo sapiens	EX_VIVO
acetohexamide	1989	acetohexamide inhibits pre-B2 B cell compared to pre-B2 VPREB1+ B cell	B cell	CL:0000236	B cell	CL:0000236	B cell	CL:0000236	B cell	CL:0000236	GSE4590_LARGE_PRE_BCELL_VS_VPREB_POS_LARGE_PRE_BCELL	0.863878212	0.405227293	-95.1793722		APPROVED	ATP channel blocker	ABCC8, KCNJ10, KCNJ11, KCNJ1	6833, 3766, 3767, 3758	SIGNATURE	Homo sapiens	PATIENT
acetohexamide	1989	acetohexamide inhibits B cell stimulated with Influenza vaccine compared to Dendritic cell stimulated with Influenza vaccine	B cell	CL:0000236	B cell	CL:0000451	Dendritic cell	CL:0000236	Dendritic cell	CL:0000451	GSE29618_BCELL_VS_MDC_DAY7_FLU_VACCINE	0.036077133		-95.63595673		APPROVED	ATP channel blocker	ABCC8, KCNJ10, KCNJ11, KCNJ1	6833, 3766, 3767, 3758	SIGNATURE_UP	Homo sapiens	UNKNOWN
acetohexamide	1989	acetohexamide inhibits B cell na茂ve compared to CD21 (high) B cell	B cell	CL:0000236	B cell na茂ve	CL:0000236	B cell	CL:0000788	B cell	CL:0000236	GSE17186_NAIVE_VS_CD21HIGH_TRANSITIONAL_BCELL_CORD_BLOOD	0.552094079	0.351138926	-96.11360239		APPROVED	ATP channel blocker	ABCC8, KCNJ10, KCNJ11, KCNJ1	6833, 3766, 3767, 3758	SIGNATURE	Homo sapiens	PATIENT
acetohexamide	1989	acetohexamide inhibits B cell stimulated with Influenza vaccine compared to Monocyte stimulated with Influenza vaccine	B cell	CL:0000236	B cell	CL:0000576	Monocyte	CL:0000236	Monocyte	CL:0000576	GSE29618_BCELL_VS_MONOCYTE_DAY7_FLU_VACCINE	0.036077133		-96.6616934		APPROVED	ATP channel blocker	ABCC8, KCNJ10, KCNJ11, KCNJ1	6833, 3766, 3767, 3758	SIGNATURE_UP	Homo sapiens	UNKNOWN
acetohexamide	1989	acetohexamide inhibits B cell compared to T CD4+ memory	B cell	CL:0000236	B cell	CL:0000084	T cell	CL:0000236	T CD4+ memory	CL:0000897	GSE3982_BCELL_VS_EFF_MEMORY_CD4_TCELL	0.044602974	0.039546603	-96.67414051		APPROVED	ATP channel blocker	ABCC8, KCNJ10, KCNJ11, KCNJ1	6833, 3766, 3767, 3758	SIGNATURE	Homo sapiens	UNKNOWN
acetohexamide	1989	acetohexamide inhibits B cell compared to NK cell	B cell	CL:0000236	B cell	CL:0000623	NK cell	CL:0000236	NK cell	CL:0000623	GSE3982_BCELL_VS_NKCELL	0.036077133		-97.10928758		APPROVED	ATP channel blocker	ABCC8, KCNJ10, KCNJ11, KCNJ1	6833, 3766, 3767, 3758	SIGNATURE_UP	Homo sapiens	UNKNOWN
acetohexamide	1989	acetohexamide inhibits CD19 B cell compared to IgD+ B B cell	B cell	CL:0000236	B cell	CL:0000236	B cell	CL:0000236	B cell	CL:0000236	GSE12845_IGD_POS_BLOOD_VS_PRE_GC_TONSIL_BCELL		0.036077133	-97.18388661		APPROVED	ATP channel blocker	ABCC8, KCNJ10, KCNJ11, KCNJ1	6833, 3766, 3767, 3758	SIGNATURE_DOWN	Homo sapiens	PATIENT
acetohexamide	1989	acetohexamide inhibits B cell na茂ve compared to Plasma cell	B cell	CL:0000236	B cell na茂ve	CL:0000236	B cell	CL:0000788	Plasma cell	CL:0000786	GSE22886_NAIVE_BCELL_VS_BM_PLASMA_CELL	0.036077133		-97.63148079		APPROVED	ATP channel blocker	ABCC8, KCNJ10, KCNJ11, KCNJ1	6833, 3766, 3767, 3758	SIGNATURE_UP	Homo sapiens	IN_SILICO
acetohexamide	1989	acetohexamide inhibits B cell compared to IgD+ B B cell	B cell	CL:0000236	B cell	CL:0000236	B cell	CL:0000236	B cell	CL:0000236	GSE12845_IGD_POS_BLOOD_VS_DARKZONE_GC_TONSIL_BCELL		0.036077133	-97.94852667		APPROVED	ATP channel blocker	ABCC8, KCNJ10, KCNJ11, KCNJ1	6833, 3766, 3767, 3758	SIGNATURE_DOWN	Homo sapiens	PATIENT
acetohexamide	1989	acetohexamide inhibits Ig isotype switched B cell memory compared to Plasma cell	B cell	CL:0000236	B cell memory	CL:0000236	B cell	CL:0000787	Plasma cell	CL:0000786	GSE13411_SWITCHED_MEMORY_BCELL_VS_PLASMA_CELL	0.036077133		-98.35882134		APPROVED	ATP channel blocker	ABCC8, KCNJ10, KCNJ11, KCNJ1	6833, 3766, 3767, 3758	SIGNATURE_UP	Homo sapiens	EX_VIVO
acetohexamide	1989	acetohexamide inhibits B cell compared to B cell na茂ve	B cell	CL:0000236	B cell	CL:0000236	B cell	CL:0000236	B cell na茂ve	CL:0000788	GSE17186_BLOOD_VS_CORD_BLOOD_NAIVE_BCELL	0.113868464	0.802932849	-98.87892377		APPROVED	ATP channel blocker	ABCC8, KCNJ10, KCNJ11, KCNJ1	6833, 3766, 3767, 3758	SIGNATURE	Homo sapiens	PATIENT
acetohexamide	1989	acetohexamide inhibits B cell compared to T CD4+ memory	B cell	CL:0000236	B cell	CL:0000084	T cell	CL:0000236	T CD4+ memory	CL:0000897	GSE3982_BCELL_VS_CENT_MEMORY_CD4_TCELL	0.057843618	0.11936304	-99.14050822		APPROVED	ATP channel blocker	ABCC8, KCNJ10, KCNJ11, KCNJ1	6833, 3766, 3767, 3758	SIGNATURE	Homo sapiens	UNKNOWN
acetohexamide	1989	acetohexamide inhibits Dendritic cell compared to Dendritic cell stimulated with Newcastle virus	Dendritic cell	CL:0000451	Dendritic cell	CL:0000451	Dendritic cell	CL:0000451	Dendritic cell	CL:0000451	GSE18791_CTRL_VS_NEWCASTLE_VIRUS_DC_8H	0.036077133		-95.07646401		APPROVED	ATP channel blocker	ABCC8, KCNJ10, KCNJ11, KCNJ1	6833, 3766, 3767, 3758	SIGNATURE_UP	Homo sapiens	IN_VITRO
acetohexamide	1989	acetohexamide inhibits Dendritic cell compared to Dendritic cell stimulated with LPS	Dendritic cell	CL:0000451	Dendritic cell	CL:0000451	Dendritic cell	CL:0000451	Dendritic cell	CL:0000451	GSE14000_UNSTIM_VS_4H_LPS_DC_TRANSLATED_RNA	0.036077133		-95.33756061		APPROVED	ATP channel blocker	ABCC8, KCNJ10, KCNJ11, KCNJ1	6833, 3766, 3767, 3758	SIGNATURE_UP	Homo sapiens	EX_VIVO
acetohexamide	1989	acetohexamide inhibits Dendritic cell compared to Dendritic cell stimulated with Newcastle virus	Dendritic cell	CL:0000451	Dendritic cell	CL:0000451	Dendritic cell	CL:0000451	Dendritic cell	CL:0000451	GSE18791_CTRL_VS_NEWCASTLE_VIRUS_DC_4H	0.036077133		-95.69190601		APPROVED	ATP channel blocker	ABCC8, KCNJ10, KCNJ11, KCNJ1	6833, 3766, 3767, 3758	SIGNATURE_UP	Homo sapiens	IN_VITRO
acetohexamide	1989	acetohexamide inhibits Dendritic cell stimulated with SIV and HIV compared to Dendritic cell	Dendritic cell	CL:0000451	Dendritic cell	CL:0000451	Dendritic cell	CL:0000451	Dendritic cell	CL:0000451	GSE22589_HEALTHY_VS_HIV_AND_SIV_INFECTED_DC		0.036077133	-95.85975382		APPROVED	ATP channel blocker	ABCC8, KCNJ10, KCNJ11, KCNJ1	6833, 3766, 3767, 3758	SIGNATURE_DOWN	Homo sapiens	IN_VITRO
acetohexamide	1989	acetohexamide inhibits Dendritic cell compared to Dendritic cell stimulated with LPS-like	Dendritic cell	CL:0000451	Dendritic cell	CL:0000451	Dendritic cell	CL:0000451	Dendritic cell	CL:0000451	GSE4748_CTRL_VS_CYANOBACTERIUM_LPSLIKE_STIM_DC_1H	0.12301186	0.951001623	-96.00149477		APPROVED	ATP channel blocker	ABCC8, KCNJ10, KCNJ11, KCNJ1	6833, 3766, 3767, 3758	SIGNATURE	Homo sapiens	IN_VITRO
acetohexamide	1989	acetohexamide inhibits Dendritic cell stimulated with LPS compared to Dendritic cell	Dendritic cell	CL:0000451	Dendritic cell	CL:0000451	Dendritic cell	CL:0000451	Dendritic cell	CL:0000451	GSE14000_4H_VS_16H_LPS_DC		0.036077133	-96.45654606		APPROVED	ATP channel blocker	ABCC8, KCNJ10, KCNJ11, KCNJ1	6833, 3766, 3767, 3758	SIGNATURE_DOWN	Homo sapiens	EX_VIVO
acetohexamide	1989	acetohexamide inhibits Dendritic cell compared to Dendritic cell stimulated with Newcastle virus	Dendritic cell	CL:0000451	Dendritic cell	CL:0000451	Dendritic cell	CL:0000451	Dendritic cell	CL:0000451	GSE18791_CTRL_VS_NEWCASTLE_VIRUS_DC_14H	0.036077133		-97.44498322		APPROVED	ATP channel blocker	ABCC8, KCNJ10, KCNJ11, KCNJ1	6833, 3766, 3767, 3758	SIGNATURE_UP	Homo sapiens	IN_VITRO
acetohexamide	1989	acetohexamide inhibits Dendritic cell compared to Dendritic cell stimulated with Newcastle virus	Dendritic cell	CL:0000451	Dendritic cell	CL:0000451	Dendritic cell	CL:0000451	Dendritic cell	CL:0000451	GSE18791_CTRL_VS_NEWCASTLE_VIRUS_DC_6H	0.036077133		-97.78067885		APPROVED	ATP channel blocker	ABCC8, KCNJ10, KCNJ11, KCNJ1	6833, 3766, 3767, 3758	SIGNATURE_UP	Homo sapiens	IN_VITRO
acetohexamide	1989	acetohexamide inhibits Dendritic cell compared to Dendritic cell stimulated with Newcastle virus	Dendritic cell	CL:0000451	Dendritic cell	CL:0000451	Dendritic cell	CL:0000451	Dendritic cell	CL:0000451	GSE18791_UNSTIM_VS_NEWCATSLE_VIRUS_DC_6H	0.036077133		-97.92987691		APPROVED	ATP channel blocker	ABCC8, KCNJ10, KCNJ11, KCNJ1	6833, 3766, 3767, 3758	SIGNATURE_UP	Homo sapiens	IN_VITRO
acetohexamide	1989	acetohexamide inhibits Dendritic cell compared to Dendritic cell stimulated with R848 and LPS	Dendritic cell	CL:0000451	Dendritic cell	CL:0000451	Dendritic cell	CL:0000451	Dendritic cell	CL:0000451	GSE2706_UNSTIM_VS_2H_LPS_AND_R848_DC	0.058434411		-97.96717643		APPROVED	ATP channel blocker	ABCC8, KCNJ10, KCNJ11, KCNJ1	6833, 3766, 3767, 3758	SIGNATURE_UP	Homo sapiens	EX_VIVO
acetohexamide	1989	acetohexamide inhibits Dendritic cell compared to Dendritic cell	Dendritic cell	CL:0000451	Dendritic cell	CL:0000451	Dendritic cell	CL:0000451	Dendritic cell	CL:0000451	GSE14000_TRANSLATED_RNA_VS_MRNA_DC	0.03135766	0.455052928	-98.13153961		APPROVED	ATP channel blocker	ABCC8, KCNJ10, KCNJ11, KCNJ1	6833, 3766, 3767, 3758	SIGNATURE	Homo sapiens	EX_VIVO
acetohexamide	1989	acetohexamide inhibits Dendritic cell compared to Monocyte	Dendritic cell	CL:0000451	Dendritic cell	CL:0000576	Monocyte	CL:0000451	Monocyte	CL:0000576	GSE22886_DC_VS_MONOCYTE	0.036077133		-99.27265946		APPROVED	ATP channel blocker	ABCC8, KCNJ10, KCNJ11, KCNJ1	6833, 3766, 3767, 3758	SIGNATURE_UP	Homo sapiens	IN_SILICO
acetohexamide	1989	acetohexamide inhibits Dendritic cell compared to Dendritic cell stimulated with Newcastle virus	Dendritic cell	CL:0000451	Dendritic cell	CL:0000451	Dendritic cell	CL:0000451	Dendritic cell	CL:0000451	GSE18791_CTRL_VS_NEWCASTLE_VIRUS_DC_12H	0.036077133		-99.44050727		APPROVED	ATP channel blocker	ABCC8, KCNJ10, KCNJ11, KCNJ1	6833, 3766, 3767, 3758	SIGNATURE_UP	Homo sapiens	IN_VITRO
acetohexamide	1989	acetohexamide inhibits Dendritic cell compared to Dendritic cell stimulated with Newcastle virus	Dendritic cell	CL:0000451	Dendritic cell	CL:0000451	Dendritic cell	CL:0000451	Dendritic cell	CL:0000451	GSE18791_CTRL_VS_NEWCASTLE_VIRUS_DC_10H	0.036077133		-99.55240582		APPROVED	ATP channel blocker	ABCC8, KCNJ10, KCNJ11, KCNJ1	6833, 3766, 3767, 3758	SIGNATURE_UP	Homo sapiens	IN_VITRO
acetohexamide	1989	acetohexamide inhibits Dendritic cell compared to Dendritic cell stimulated with Newcastle virus	Dendritic cell	CL:0000451	Dendritic cell	CL:0000451	Dendritic cell	CL:0000451	Dendritic cell	CL:0000451	GSE18791_UNSTIM_VS_NEWCATSLE_VIRUS_DC_10H	0.036077133		-99.62700485		APPROVED	ATP channel blocker	ABCC8, KCNJ10, KCNJ11, KCNJ1	6833, 3766, 3767, 3758	SIGNATURE_UP	Homo sapiens	IN_VITRO
acetohexamide	1989	acetohexamide inhibits Dendritic cell compared to Dendritic cell stimulated with L.donovani	Dendritic cell	CL:0000451	Dendritic cell	CL:0000451	Dendritic cell	CL:0000451	Dendritic cell	CL:0000451	GSE42088_UNINF_VS_LEISHMANIA_INF_DC_4H	0.036077133		-99.68295412		APPROVED	ATP channel blocker	ABCC8, KCNJ10, KCNJ11, KCNJ1	6833, 3766, 3767, 3758	SIGNATURE_UP	Homo sapiens	IN_VITRO
acetohexamide	1989	acetohexamide inhibits Dendritic cell compared to Dendritic cell stimulated with LPS	Dendritic cell	CL:0000451	Dendritic cell	CL:0000451	Dendritic cell	CL:0000451	Dendritic cell	CL:0000451	GSE14000_UNSTIM_VS_4H_LPS_DC	0.036077133		-99.75755315		APPROVED	ATP channel blocker	ABCC8, KCNJ10, KCNJ11, KCNJ1	6833, 3766, 3767, 3758	SIGNATURE_UP	Homo sapiens	EX_VIVO
acetohexamide	1989	acetohexamide inhibits Dendritic cell compared to Dendritic cell stimulated with L.donovani	Dendritic cell	CL:0000451	Dendritic cell	CL:0000451	Dendritic cell	CL:0000451	Dendritic cell	CL:0000451	GSE42088_UNINF_VS_LEISHMANIA_INF_DC_4H	0.03135766	0.039546603	-99.88789238		APPROVED	ATP channel blocker	ABCC8, KCNJ10, KCNJ11, KCNJ1	6833, 3766, 3767, 3758	SIGNATURE	Homo sapiens	IN_VITRO
acetohexamide	1989	acetohexamide inhibits Macrophage stimulated with IFNa and MCSF compared to Macrophage stimulated with MCSF	Macrophage	CL:0000235	Macrophage	CL:0000235	Macrophage	CL:0000235	Macrophage	CL:0000235	GSE1740_MCSF_VS_MCSF_AND_IFNG_DAY2_DERIVED_MACROPHAGE		0.036077133	-95.05781425		APPROVED	ATP channel blocker	ABCC8, KCNJ10, KCNJ11, KCNJ1	6833, 3766, 3767, 3758	SIGNATURE_DOWN	Homo sapiens	EX_VIVO
acetohexamide	1989	acetohexamide inhibits Macrophage stimulated with T.gondii compared to Macrophage stimulated with L.major	Macrophage	CL:0000235	Macrophage	CL:0000235	Macrophage	CL:0000235	Macrophage	CL:0000235	GSE360_L_MAJOR_VS_T_GONDII_MAC		0.036077133	-95.15106304		APPROVED	ATP channel blocker	ABCC8, KCNJ10, KCNJ11, KCNJ1	6833, 3766, 3767, 3758	SIGNATURE_DOWN	Homo sapiens	IN_VITRO
acetohexamide	1989	acetohexamide inhibits Macrophage in Arthritis compared to Macrophage	Macrophage	CL:0000235	Macrophage	CL:0000235	Macrophage	CL:0000235	Macrophage	CL:0000235	GSE10500_ARTHRITIC_SYNOVIAL_FLUID_VS_HEALTHY_MACROPHAGE	0.036077133		-95.5613577		APPROVED	ATP channel blocker	ABCC8, KCNJ10, KCNJ11, KCNJ1	6833, 3766, 3767, 3758	SIGNATURE_UP	Homo sapiens	PATIENT
acetohexamide	1989	acetohexamide inhibits Macrophage stimulated with CSF1 and Pam3Cys compared to Macrophage stimulated with CSF11IFNg	Macrophage	CL:0000235	Macrophage	CL:0000235	Macrophage	CL:0000235	Macrophage	CL:0000235	GSE11864_CSF1_IFNG_VS_CSF1_PAM3CYS_IN_MAC		0.036077133	-96.81089146		APPROVED	ATP channel blocker	ABCC8, KCNJ10, KCNJ11, KCNJ1	6833, 3766, 3767, 3758	SIGNATURE_DOWN	Homo sapiens	IN_VITRO
acetohexamide	1989	acetohexamide inhibits Macrophage stimulated with CXCL4 compared to Macrophage stimulated with CSF1	Macrophage	CL:0000235	Macrophage	CL:0000235	Macrophage	CL:0000235	Macrophage	CL:0000235	GSE20484_MCSG_VS_CXCL4_MONOCYTE_DERIVED_MACROPHAGE		0.036077133	-97.22118612		APPROVED	ATP channel blocker	ABCC8, KCNJ10, KCNJ11, KCNJ1	6833, 3766, 3767, 3758	SIGNATURE_DOWN	Homo sapiens	IN_VITRO
acetohexamide	1989	acetohexamide inhibits Macrophage compared to Macrophage stimulated with IFNa	Macrophage	CL:0000235	Macrophage	CL:0000235	Macrophage	CL:0000235	Macrophage	CL:0000235	GSE16755_CTRL_VS_IFNA_TREATED_MAC	0.036077133		-97.50093249		APPROVED	ATP channel blocker	ABCC8, KCNJ10, KCNJ11, KCNJ1	6833, 3766, 3767, 3758	SIGNATURE_UP	Homo sapiens	EX_VIVO
acetohexamide	1989	acetohexamide inhibits Macrophage stimulated with IL4 compared to Macrophage stimulated with IL10	Macrophage	CL:0000235	Macrophage	CL:0000235	Macrophage	CL:0000235	Macrophage	CL:0000235	GSE85260_Macrophage_IL10_vs_Macrophage_IL4		0.223873742	-97.55688176		APPROVED	ATP channel blocker	ABCC8, KCNJ10, KCNJ11, KCNJ1	6833, 3766, 3767, 3758	SIGNATURE_DOWN	Homo sapiens	UNKNOWN
acetohexamide	1989	acetohexamide inhibits Macrophage compared to Neutrophil	Macrophage	CL:0000235	Macrophage	CL:0000775	Neutrophil	CL:0000235	Neutrophil	CL:0000775	GSE3982_MAC_VS_NEUTROPHIL	0.036077133		-97.70607982		APPROVED	ATP channel blocker	ABCC8, KCNJ10, KCNJ11, KCNJ1	6833, 3766, 3767, 3758	SIGNATURE_UP	Homo sapiens	UNKNOWN
acetohexamide	1989	acetohexamide inhibits Macrophage stimulated with CSF1 and Pam3Cys Stimulation compared to Macrophage	Macrophage	CL:0000235	Macrophage	CL:0000235	Macrophage	CL:0000235	Macrophage	CL:0000235	GSE11864_UNTREATED_VS_CSF1_PAM3CYS_IN_MAC		0.036077133	-97.76202909		APPROVED	ATP channel blocker	ABCC8, KCNJ10, KCNJ11, KCNJ1	6833, 3766, 3767, 3758	SIGNATURE_DOWN	Homo sapiens	IN_VITRO
acetohexamide	1989	acetohexamide inhibits Macrophage stimulated with L.donovani compared to Macrophage stimulated with B.malayi	Macrophage	CL:0000235	Macrophage	CL:0000235	Macrophage	CL:0000235	Macrophage	CL:0000235	GSE360_L_DONOVANI_VS_B_MALAYI_HIGH_DOSE_MAC	0.795550316	0.039546603	-97.90732436		APPROVED	ATP channel blocker	ABCC8, KCNJ10, KCNJ11, KCNJ1	6833, 3766, 3767, 3758	SIGNATURE	Homo sapiens	IN_VITRO
acetohexamide	1989	acetohexamide inhibits Macrophage compared to Macrophage stimulated with CMYC Inhibitor	Macrophage	CL:0000235	Macrophage	CL:0000235	Macrophage	CL:0000235	Macrophage	CL:0000235	GSE32164_RESTING_DIFFERENTIATED_VS_CMYC_INHIBITED_MACROPHAGE	0.212905572	0.40248416	-98.28101644		APPROVED	ATP channel blocker	ABCC8, KCNJ10, KCNJ11, KCNJ1	6833, 3766, 3767, 3758	SIGNATURE	Homo sapiens	IN_VITRO
acetohexamide	1989	acetohexamide inhibits Macrophage in Systemic sclerosis compared to Macrophage	Macrophage	CL:0000235	Macrophage	CL:0000235	Macrophage	CL:0000235	Macrophage	CL:0000235	GSE104174_SSc_GPL16791_Macrophages	0.862980002	0.095314081	-98.31838565		APPROVED	ATP channel blocker	ABCC8, KCNJ10, KCNJ11, KCNJ1	6833, 3766, 3767, 3758	SIGNATURE	Homo sapiens	PATIENT
acetohexamide	1989	acetohexamide inhibits Macrophage stimulated with CSF1 compared to Macrophage	Macrophage	CL:0000235	Macrophage	CL:0000235	Macrophage	CL:0000235	Macrophage	CL:0000235	GSE11864_UNTREATED_VS_CSF1_IN_MAC		0.036077133	-98.39612085		APPROVED	ATP channel blocker	ABCC8, KCNJ10, KCNJ11, KCNJ1	6833, 3766, 3767, 3758	SIGNATURE_DOWN	Homo sapiens	IN_VITRO
acetohexamide	1989	acetohexamide inhibits Macrophage stimulated with IL4, Dexamethasone and TGFB compared to Macrophage stimulated with IL4 and Dexamethasone	Macrophage	CL:0000235	Macrophage	CL:0000235	Macrophage	CL:0000235	Macrophage	CL:0000235	GSE7568_CTRL_VS_3H_TGFB_TREATED_MACROPHAGES_WITH_IL4_AND_DEXAMETHASONE		0.036077133	-99.57105558		APPROVED	ATP channel blocker	ABCC8, KCNJ10, KCNJ11, KCNJ1	6833, 3766, 3767, 3758	SIGNATURE_DOWN	Homo sapiens	IN_VITRO
acetohexamide	1989	acetohexamide inhibits Monocyte stimulated with anti-TREM1 compared to Monocyte stimulated with IgG	Monocyte	CL:0000576	Monocyte	CL:0000576	Monocyte	CL:0000576	Monocyte	CL:0000576	GSE9988_ANTI_TREM1_VS_CTRL_TREATED_MONOCYTES	0.058434411		-95.22566207		APPROVED	ATP channel blocker	ABCC8, KCNJ10, KCNJ11, KCNJ1	6833, 3766, 3767, 3758	SIGNATURE_UP	Homo sapiens	EX_VIVO
acetohexamide	1989	acetohexamide inhibits Monocyte stimulated with cultured (1 day) compared to Monocyte stimulated with cultured (0 days)	Monocyte	CL:0000576	Monocyte	CL:0000576	Monocyte	CL:0000576	Monocyte	CL:0000576	GSE22886_DAY0_VS_DAY1_MONOCYTE_IN_CULTURE		0.036077133	-95.41215964		APPROVED	ATP channel blocker	ABCC8, KCNJ10, KCNJ11, KCNJ1	6833, 3766, 3767, 3758	SIGNATURE_DOWN	Homo sapiens	IN_SILICO
acetohexamide	1989	acetohexamide inhibits Monocyte compared to Monocyte stimulated with M. tuberculosis	Monocyte	CL:0000576	Monocyte	CL:0000576	Monocyte	CL:0000576	Monocyte	CL:0000576	GSE8921_UNSTIM_VS_TLR1_2_STIM_MONOCYTE_12H	0.068074482		-95.4308094		APPROVED	ATP channel blocker	ABCC8, KCNJ10, KCNJ11, KCNJ1	6833, 3766, 3767, 3758	SIGNATURE_UP	Homo sapiens	IN_VITRO
acetohexamide	1989	acetohexamide inhibits Monocyte stimulated with anti-TREM1 and LPS compared to Monocyte	Monocyte	CL:0000576	Monocyte	CL:0000576	Monocyte	CL:0000576	Monocyte	CL:0000576	GSE9988_ANTI_TREM1_AND_LPS_VS_VEHICLE_TREATED_MONOCYTES	0.036077133		-95.50540843		APPROVED	ATP channel blocker	ABCC8, KCNJ10, KCNJ11, KCNJ1	6833, 3766, 3767, 3758	SIGNATURE_UP	Homo sapiens	EX_VIVO
acetohexamide	1989	acetohexamide inhibits Monocyte stimulated with anti-TREM1 compared to Monocyte stimulated with LPS (low)	Monocyte	CL:0000576	Monocyte	CL:0000576	Monocyte	CL:0000576	Monocyte	CL:0000576	GSE9988_ANTI_TREM1_VS_LOW_LPS_MONOCYTE	0.435808157	0.324446828	-97.6083707		APPROVED	ATP channel blocker	ABCC8, KCNJ10, KCNJ11, KCNJ1	6833, 3766, 3767, 3758	SIGNATURE	Homo sapiens	EX_VIVO
acetohexamide	1989	acetohexamide inhibits Monocyte stimulated with anti-TREM1 compared to Monocyte	Monocyte	CL:0000576	Monocyte	CL:0000576	Monocyte	CL:0000576	Monocyte	CL:0000576	GSE9988_ANTI_TREM1_VS_VEHICLE_TREATED_MONOCYTES	0.036077133		-98.17232376		APPROVED	ATP channel blocker	ABCC8, KCNJ10, KCNJ11, KCNJ1	6833, 3766, 3767, 3758	SIGNATURE_UP	Homo sapiens	EX_VIVO
acetohexamide	1989	acetohexamide inhibits Monocyte compared to Monocyte in Breast invasive carcinom	Monocyte	CL:0000576	Monocyte	CL:0000576	Monocyte	CL:0000576	Monocyte	CL:0000576	Casseta_NonClassicalActivated_Monocyte_BRCA_vs_healthy_monocyte		0.307737748	-98.34017158		APPROVED	ATP channel blocker	ABCC8, KCNJ10, KCNJ11, KCNJ1	6833, 3766, 3767, 3758	SIGNATURE_DOWN	Homo sapiens	PATIENT
acetohexamide	1989	acetohexamide inhibits Monocyte stimulated with anti-TREM1 compared to Monocyte stimulated with LPS	Monocyte	CL:0000576	Monocyte	CL:0000576	Monocyte	CL:0000576	Monocyte	CL:0000576	GSE9988_ANTI_TREM1_VS_LPS_MONOCYTE	0.18815331	0.603153427	-98.39312407		APPROVED	ATP channel blocker	ABCC8, KCNJ10, KCNJ11, KCNJ1	6833, 3766, 3767, 3758	SIGNATURE	Homo sapiens	EX_VIVO
acetohexamide	1989	acetohexamide inhibits Monocyte stimulated with IgG compared to Monocyte stimulated with LPS	Monocyte	CL:0000576	Monocyte	CL:0000576	Monocyte	CL:0000576	Monocyte	CL:0000576	GSE9988_LPS_VS_CTRL_TREATED_MONOCYTE		0.036077133	-98.54531891		APPROVED	ATP channel blocker	ABCC8, KCNJ10, KCNJ11, KCNJ1	6833, 3766, 3767, 3758	SIGNATURE_DOWN	Homo sapiens	EX_VIVO
acetohexamide	1989	acetohexamide inhibits Monocyte stimulated with IgG compared to Monocyte stimulated with LPS (low dose)	Monocyte	CL:0000576	Monocyte	CL:0000576	Monocyte	CL:0000576	Monocyte	CL:0000576	GSE9988_LOW_LPS_VS_CTRL_TREATED_MONOCYTE		0.036077133	-99.58970533		APPROVED	ATP channel blocker	ABCC8, KCNJ10, KCNJ11, KCNJ1	6833, 3766, 3767, 3758	SIGNATURE_DOWN	Homo sapiens	EX_VIVO
acetohexamide	1989	acetohexamide inhibits Monocyte stimulated with M. tuberculosis compared to Monocyte stimulated with Muramyl Dipeptide and M. tuberculosis	Monocyte	CL:0000576	Monocyte	CL:0000576	Monocyte	CL:0000576	Monocyte	CL:0000576	GSE34156_TLR1_TLR2_LIGAND_VS_NOD2_AND_TLR1_TLR2_LIGAND_6H_TREATED_MONOCYTE	0.628689617	0.198995039	-99.85052317		APPROVED	ATP channel blocker	ABCC8, KCNJ10, KCNJ11, KCNJ1	6833, 3766, 3767, 3758	SIGNATURE	Homo sapiens	IN_VITRO
acetohexamide	1989	acetohexamide inhibits Neutrophil compared to Neutrophil stimulated with A.phagocytophilum	Neutrophil	CL:0000775	Neutrophil	CL:0000775	Neutrophil	CL:0000775	Neutrophil	CL:0000775	GSE2405_0H_VS_6H_A_PHAGOCYTOPHILUM_STIM_NEUTROPHIL	0.036077133		-95.74785528		APPROVED	ATP channel blocker	ABCC8, KCNJ10, KCNJ11, KCNJ1	6833, 3766, 3767, 3758	SIGNATURE_UP	Homo sapiens	EX_VIVO
acetohexamide	1989	acetohexamide inhibits Neutrophil compared to Neutrophil stimulated with F.tularensis	Neutrophil	CL:0000775	Neutrophil	CL:0000775	Neutrophil	CL:0000775	Neutrophil	CL:0000775	GSE37416_CTRL_VS_12H_F_TULARENSIS_LVS_NEUTROPHIL	0.036077133		-96.92279		APPROVED	ATP channel blocker	ABCC8, KCNJ10, KCNJ11, KCNJ1	6833, 3766, 3767, 3758	SIGNATURE_UP	Homo sapiens	IN_VITRO
acetohexamide	1989	acetohexamide inhibits Basophil compared to Neutrophil	Neutrophil	CL:0000775	Neutrophil	CL:0000767	Basophil	CL:0000775	Basophil	CL:0000767	GSE3982_NEUTROPHIL_VS_BASOPHIL		0.036077133	-97.61283103		APPROVED	ATP channel blocker	ABCC8, KCNJ10, KCNJ11, KCNJ1	6833, 3766, 3767, 3758	SIGNATURE_DOWN	Homo sapiens	UNKNOWN
acetohexamide	1989	acetohexamide inhibits Neutrophil compared to Neutrophil stimulated with A.phagocytophilum	Neutrophil	CL:0000775	Neutrophil	CL:0000775	Neutrophil	CL:0000775	Neutrophil	CL:0000775	GSE2405_0H_VS_9H_A_PHAGOCYTOPHILUM_STIM_NEUTROPHIL	0.122170086	0.328129338	-97.94469357		APPROVED	ATP channel blocker	ABCC8, KCNJ10, KCNJ11, KCNJ1	6833, 3766, 3767, 3758	SIGNATURE	Homo sapiens	EX_VIVO
acetohexamide	1989	acetohexamide inhibits Neutrophil compared to Neutrophil stimulated with F.tularensis	Neutrophil	CL:0000775	Neutrophil	CL:0000775	Neutrophil	CL:0000775	Neutrophil	CL:0000775	GSE37416_CTRL_VS_3H_F_TULARENSIS_LVS_NEUTROPHIL	0.036077133		-99.10481164		APPROVED	ATP channel blocker	ABCC8, KCNJ10, KCNJ11, KCNJ1	6833, 3766, 3767, 3758	SIGNATURE_UP	Homo sapiens	IN_VITRO
acetohexamide	1989	acetohexamide inhibits PBMC in Lupus erythematosus compared to PBMC	PBMC	CL:2000001	PBMC	CL:2000001	PBMC	CL:2000001	PBMC	CL:2000001	GSE11907_SLE_GPL97_PBMCs	0.410061513		-95.67325625		APPROVED	ATP channel blocker	ABCC8, KCNJ10, KCNJ11, KCNJ1	6833, 3766, 3767, 3758	SIGNATURE_UP	Homo sapiens	PATIENT
acetohexamide	1989	acetohexamide inhibits PBMC stimulated with YF17D Vaccine (3 days) compared to PBMC stimulated with YF17D Vaccine (1 day)	PBMC	CL:2000001	PBMC	CL:2000001	PBMC	CL:2000001	PBMC	CL:2000001	GSE13485_DAY1_VS_DAY3_YF17D_VACCINE_PBMC		0.036077133	-96.60574413		APPROVED	ATP channel blocker	ABCC8, KCNJ10, KCNJ11, KCNJ1	6833, 3766, 3767, 3758	SIGNATURE_DOWN	Homo sapiens	PATIENT
acetohexamide	1989	acetohexamide inhibits PBMC compared to PBMC stimulated with YF17D Vaccine	PBMC	CL:2000001	PBMC	CL:2000001	PBMC	CL:2000001	PBMC	CL:2000001	GSE13485_CTRL_VS_DAY21_YF17D_VACCINE_PBMC	0.036077133		-96.77359194		APPROVED	ATP channel blocker	ABCC8, KCNJ10, KCNJ11, KCNJ1	6833, 3766, 3767, 3758	SIGNATURE_UP	Homo sapiens	PATIENT
acetohexamide	1989	acetohexamide inhibits PBMC stimulated with Influenza compared to PBMC stimulated with S.aureus	PBMC	CL:2000001	PBMC	CL:2000001	PBMC	CL:2000001	PBMC	CL:2000001	GSE6269_FLU_VS_STAPH_AUREUS_INF_PBMC	0.036077133		-98.8996643		APPROVED	ATP channel blocker	ABCC8, KCNJ10, KCNJ11, KCNJ1	6833, 3766, 3767, 3758	SIGNATURE_UP	Homo sapiens	PATIENT
acetohexamide	1989	acetohexamide inhibits PBMC compared to PBMC stimulated with YF17D Vaccine	PBMC	CL:2000001	PBMC	CL:2000001	PBMC	CL:2000001	PBMC	CL:2000001	GSE13485_CTRL_VS_DAY1_YF17D_VACCINE_PBMC	0.036077133		-99.90675121		APPROVED	ATP channel blocker	ABCC8, KCNJ10, KCNJ11, KCNJ1	6833, 3766, 3767, 3758	SIGNATURE_UP	Homo sapiens	PATIENT
acetohexamide	1989	acetohexamide inhibits T CD8+ stimulated with IFNa5, CD28 and anti-CD3 compared to T CD8+	T cell	CL:0000084	T CD8+	CL:0000084	T cell	CL:0002437	T CD8+	CL:0002437	GSE17301_CTRL_VS_48H_ACD3_ACD28_IFNA5_STIM_CD8_TCELL		0.058434411	-95.09511376		APPROVED	ATP channel blocker	ABCC8, KCNJ10, KCNJ11, KCNJ1	6833, 3766, 3767, 3758	SIGNATURE_DOWN	Homo sapiens	IN_VITRO
acetohexamide	1989	acetohexamide inhibits T cell compared to T CD4+ na茂ve	T cell	CL:0000084	T cell	CL:0000084	T cell	CL:0000084	T CD4+ na茂ve	CL:0000895	GSE1460_INTRATHYMIC_T_PROGENITOR_VS_NAIVE_CD4_TCELL_ADULT_BLOOD	0.036077133		-95.46810891		APPROVED	ATP channel blocker	ABCC8, KCNJ10, KCNJ11, KCNJ1	6833, 3766, 3767, 3758	SIGNATURE_UP	Homo sapiens	UNKNOWN
acetohexamide	1989	acetohexamide inhibits T CD4+ compared to T CD4+ stimulated with TGFB	T cell	CL:0000084	T CD4+	CL:0000084	T cell	CL:0000624	T CD4+	CL:0000624	GSE7460_CTRL_VS_TGFB_TREATED_ACT_FOXP3_HET_TCONV	0.036077133		-95.82245431		APPROVED	ATP channel blocker	ABCC8, KCNJ10, KCNJ11, KCNJ1	6833, 3766, 3767, 3758	SIGNATURE_UP	Homo sapiens	EX_VIVO
acetohexamide	1989	acetohexamide inhibits T CD4+ stimulated with IL4 and anti-IL12 compared to T CD4+	T cell	CL:0000084	T CD4+	CL:0000084	T cell	CL:0000624	T CD4+	CL:0000624	GSE17974_IL4_AND_ANTI_IL12_VS_UNTREATED_24H_ACT_CD4_TCELL	0.999390592	0.095314081	-96.22571001		APPROVED	ATP channel blocker	ABCC8, KCNJ10, KCNJ11, KCNJ1	6833, 3766, 3767, 3758	SIGNATURE	Homo sapiens	EX_VIVO
acetohexamide	1989	acetohexamide inhibits T cell compared to T regulatory	T cell	CL:0000084	T cell	CL:0000084	T cell	CL:0000084	T regulatory	CL:0000815	GSE7460_TCONV_VS_TREG_LN	0.391173521	0.845829238	-96.52466368		APPROVED	ATP channel blocker	ABCC8, KCNJ10, KCNJ11, KCNJ1	6833, 3766, 3767, 3758	SIGNATURE	Homo sapiens	EX_VIVO
acetohexamide	1989	acetohexamide inhibits T CD4+ stimulated with allergen in atopic skin compared to T CD4+ stimulated with allergen	T cell	CL:0000084	T CD4+	CL:0000084	T cell	CL:0000624	T CD4+	CL:0000624	GSE14908_ATOPIC_VS_NONATOPIC_PATIENT_HDM_STIM_CD4_TCELL	0.036077133		-96.71764267		APPROVED	ATP channel blocker	ABCC8, KCNJ10, KCNJ11, KCNJ1	6833, 3766, 3767, 3758	SIGNATURE_UP	Homo sapiens	PATIENT
acetohexamide	1989	acetohexamide inhibits T CD8+ na茂ve compared to T CD4+ na茂ve	T cell	CL:0000084	T CD8+ na茂ve	CL:0000084	T cell	CL:0000898	T CD4+ na茂ve	CL:0000895	GSE22886_CD8_VS_CD4_NAIVE_TCELL	0.036077133		-96.73629243		APPROVED	ATP channel blocker	ABCC8, KCNJ10, KCNJ11, KCNJ1	6833, 3766, 3767, 3758	SIGNATURE_UP	Homo sapiens	IN_SILICO
acetohexamide	1989	acetohexamide inhibits T CD4+ na茂ve compared to T helper stimulated with IL12, anti-CD3 and anti-CD28	T cell	CL:0000084	T CD4+ na茂ve	CL:0000084	T cell	CL:0000895	T helper	CL:0000492	GSE2770_UNTREATED_VS_IL12_TREATED_ACT_CD4_TCELL_48H	0.068074482		-96.7922417		APPROVED	ATP channel blocker	ABCC8, KCNJ10, KCNJ11, KCNJ1	6833, 3766, 3767, 3758	SIGNATURE_UP	Homo sapiens	EX_VIVO
acetohexamide	1989	acetohexamide inhibits T CD4+ in Cuteaneous T-cell lymphoma compared to T CD4+ stimulated with IL21 and IL2 in Cuteaneous T-cell lymphoma	T cell	CL:0000084	T CD4+	CL:0000084	T cell	CL:0000624	T CD4+	CL:0000624	GSE8685_IL2_STARVED_VS_IL21_ACT_IL2_STARVED_CD4_TCELL	0.036077133		-96.82954122		APPROVED	ATP channel blocker	ABCC8, KCNJ10, KCNJ11, KCNJ1	6833, 3766, 3767, 3758	SIGNATURE_UP	Homo sapiens	IN_VITRO
acetohexamide	1989	acetohexamide inhibits T CD4+ compared to T CD4+ stimulated with HDAC inhibitor	T cell	CL:0000084	T CD4+	CL:0000084	T cell	CL:0000624	T CD4+	CL:0000624	GSE15735_CTRL_VS_HDAC_INHIBITOR_TREATED_CD4_TCELL_2H	0.698067987	0.313537223	-96.93572496		APPROVED	ATP channel blocker	ABCC8, KCNJ10, KCNJ11, KCNJ1	6833, 3766, 3767, 3758	SIGNATURE	Homo sapiens	IN_VIVO
acetohexamide	1989	acetohexamide inhibits T helper stimulated with IL4, TGFB, anti-CD3 and anti-CD28 compared to T helper stimulated with IL4, anti-CD3 and anti-CD28	T cell	CL:0000084	T helper	CL:0000084	T cell	CL:0000492	T helper	CL:0000492	GSE2770_TGFB_AND_IL4_VS_IL4_TREATED_ACT_CD4_TCELL_48H	0.036077133		-97.03468855		APPROVED	ATP channel blocker	ABCC8, KCNJ10, KCNJ11, KCNJ1	6833, 3766, 3767, 3758	SIGNATURE_UP	Homo sapiens	EX_VIVO
acetohexamide	1989	acetohexamide inhibits B cell in Lupus erythematosus compared to T CD4+ in Lupus erythematosus	T cell	CL:0000084	T CD4+	CL:0000236	B cell	CL:0000624	B cell	CL:0000236	GSE10325_LUPUS_CD4_TCELL_VS_LUPUS_BCELL		0.036077133	-97.35173443		APPROVED	ATP channel blocker	ABCC8, KCNJ10, KCNJ11, KCNJ1	6833, 3766, 3767, 3758	SIGNATURE_DOWN	Homo sapiens	PATIENT
acetohexamide	1989	acetohexamide inhibits T helper stimulated with CD28 and anti-CD3 compared to T helper stimulated with IL12, CD28 and anti-CD3	T cell	CL:0000084	T helper	CL:0000084	T cell	CL:0000492	T helper	CL:0000492	GSE2770_IL12_ACT_VS_ACT_CD4_TCELL_2H		0.036077133	-97.38903394		APPROVED	ATP channel blocker	ABCC8, KCNJ10, KCNJ11, KCNJ1	6833, 3766, 3767, 3758	SIGNATURE_DOWN	Homo sapiens	EX_VIVO
acetohexamide	1989	acetohexamide inhibits T helper stimulated with IL12, TGFB, anti-CD3 and anti-CD28 compared to T helper stimulated with anti-CD3 and anti-CD28	T cell	CL:0000084	T helper	CL:0000084	T cell	CL:0000492	T helper	CL:0000492	GSE2770_IL12_AND_TGFB_ACT_VS_ACT_CD4_TCELL_2H	0.036077133		-97.65013055		APPROVED	ATP channel blocker	ABCC8, KCNJ10, KCNJ11, KCNJ1	6833, 3766, 3767, 3758	SIGNATURE_UP	Homo sapiens	EX_VIVO
acetohexamide	1989	acetohexamide inhibits T CD4+ stimulated with IL4 and anti-IL12 compared to T CD4+	T cell	CL:0000084	T CD4+	CL:0000084	T cell	CL:0000624	T CD4+	CL:0000624	GSE17974_IL4_AND_ANTI_IL12_VS_UNTREATED_48H_ACT_CD4_TCELL	0.841169339	0.400119617	-97.68310912		APPROVED	ATP channel blocker	ABCC8, KCNJ10, KCNJ11, KCNJ1	6833, 3766, 3767, 3758	SIGNATURE	Homo sapiens	EX_VIVO
acetohexamide	1989	acetohexamide inhibits T CD4+ stimulated with HIV compared to T CD4+ stimulated with HIV	T cell	CL:0000084	T CD4+	CL:0000084	T cell	CL:0000624	T CD4+	CL:0000624	GSE12963_ENV_NEF_VS_ENV_NEF_AND_VPR_DEFICIENT_HIV1_INF_CD4_TCELL	0.11564651		-97.81797837		APPROVED	ATP channel blocker	ABCC8, KCNJ10, KCNJ11, KCNJ1	6833, 3766, 3767, 3758	SIGNATURE_UP	Homo sapiens	IN_VITRO
acetohexamide	1989	acetohexamide inhibits T CD4+ stimulated with allergen compared to T CD4+ stimulated with allergen in atopic skin	T cell	CL:0000084	T CD4+	CL:0000084	T cell	CL:0000624	T CD4+	CL:0000624	GSE14908_ATOPIC_VS_NONATOPIC_PATIENT_HDM_STIM_CD4_TCELL		0.036077133	-97.87392764		APPROVED	ATP channel blocker	ABCC8, KCNJ10, KCNJ11, KCNJ1	6833, 3766, 3767, 3758	SIGNATURE_DOWN	Homo sapiens	PATIENT
acetohexamide	1989	acetohexamide inhibits VD1 T cell gamma/delta compared to VD1 T cell gamma/delta stimulated with LPS	T cell	CL:0000084	T cell gamma/delta	CL:0000084	T cell	CL:0000798	T cell gamma/delta	CL:0000798	GSE3720_UNSTIM_VS_LPS_STIM_VD1_GAMMADELTA_TCELL	0.233019854	0.331451274	-98.0568012		APPROVED	ATP channel blocker	ABCC8, KCNJ10, KCNJ11, KCNJ1	6833, 3766, 3767, 3758	SIGNATURE	Homo sapiens	IN_VIVO
acetohexamide	1989	acetohexamide inhibits T helper stimulated with IL4, TGFB, anti-CD3 and anti-CD28 compared to T helper stimulated with IL12, TGFB, anti-CD3 and anti-CD28	T cell	CL:0000084	T helper	CL:0000084	T cell	CL:0000492	T helper	CL:0000492	GSE2770_TGFB_AND_IL4_VS_TGFB_AND_IL12_TREATED_ACT_CD4_TCELL_48H	0.369257108	0.785073488	-98.16890882		APPROVED	ATP channel blocker	ABCC8, KCNJ10, KCNJ11, KCNJ1	6833, 3766, 3767, 3758	SIGNATURE	Homo sapiens	EX_VIVO
acetohexamide	1989	acetohexamide inhibits VD1 T cell gamma/delta stimulated with PMA and ionomycin compared to VD2 T cell gamma/delta stimulated with PMA and ionomycin	T cell	CL:0000084	T cell gamma/delta	CL:0000084	T cell	CL:0000798	T cell gamma/delta	CL:0000798	GSE3720_VD1_VS_VD2_GAMMADELTA_TCELL_WITH_PMA_STIM	0.036077133		-98.41477061		APPROVED	ATP channel blocker	ABCC8, KCNJ10, KCNJ11, KCNJ1	6833, 3766, 3767, 3758	SIGNATURE_UP	Homo sapiens	IN_VIVO
acetohexamide	1989	acetohexamide inhibits T cell compared to CD4+CD8+ Thymocyte	T cell	CL:0000084	T cell	CL:0000837	Hematopoietic stem and progenitor cells	CL:0000084	Thymocyte	CL:0000893	GSE1460_INTRATHYMIC_T_PROGENITOR_VS_CD4_THYMOCYTE	0.036077133		-98.43342037		APPROVED	ATP channel blocker	ABCC8, KCNJ10, KCNJ11, KCNJ1	6833, 3766, 3767, 3758	SIGNATURE_UP	Homo sapiens	UNKNOWN
acetohexamide	1989	acetohexamide inhibits central T CD8+ memory compared to T CD8+ na茂ve	T cell	CL:0000084	T CD8+ memory	CL:0000084	T cell	CL:0000909	T CD8+ na茂ve	CL:0000898	GSE23321_CENTRAL_MEMORY_VS_NAIVE_CD8_TCELL	0.510785447	0.039546603	-98.5426009		APPROVED	ATP channel blocker	ABCC8, KCNJ10, KCNJ11, KCNJ1	6833, 3766, 3767, 3758	SIGNATURE	Homo sapiens	IN_VIVO
acetohexamide	1989	acetohexamide inhibits T regulatory stimulated with TNF compared to T cell stimulated with TNF	T cell	CL:0000084	T cell	CL:0000084	T cell	CL:0000084	T regulatory	CL:0000815	GSE18893_TCONV_VS_TREG_2H_TNF_STIM		0.036077133	-98.6385677		APPROVED	ATP channel blocker	ABCC8, KCNJ10, KCNJ11, KCNJ1	6833, 3766, 3767, 3758	SIGNATURE_DOWN	Homo sapiens	IN_VITRO
acetohexamide	1989	acetohexamide inhibits Dendritic cell compared to T CD4+ na茂ve	T cell	CL:0000084	T CD4+ na茂ve	CL:0000451	Dendritic cell	CL:0000895	Dendritic cell	CL:0000451	GSE22886_NAIVE_CD4_TCELL_VS_DC		0.036077133	-98.71316673		APPROVED	ATP channel blocker	ABCC8, KCNJ10, KCNJ11, KCNJ1	6833, 3766, 3767, 3758	SIGNATURE_DOWN	Homo sapiens	IN_SILICO
acetohexamide	1989	acetohexamide inhibits T CD4+ na茂ve compared to T helper stimulated with IL12, TGFB, anti-CD3 and anti-CD28	T cell	CL:0000084	T CD4+ na茂ve	CL:0000084	T cell	CL:0000895	T helper	CL:0000492	GSE2770_UNTREATED_VS_TGFB_AND_IL12_TREATED_ACT_CD4_TCELL_6H	0.036077133		-99.03021261		APPROVED	ATP channel blocker	ABCC8, KCNJ10, KCNJ11, KCNJ1	6833, 3766, 3767, 3758	SIGNATURE_UP	Homo sapiens	EX_VIVO
acetohexamide	1989	acetohexamide inhibits T CD4+ compared to T CD4+ stimulated with HIV	T cell	CL:0000084	T CD4+	CL:0000084	T cell	CL:0000624	T CD4+	CL:0000624	GSE12963_UNINF_VS_ENV_AND_NEF_AND_VPR_DEFICIENT_HIV1_INF_CD4_TCELL	0.068074482		-99.06751212		APPROVED	ATP channel blocker	ABCC8, KCNJ10, KCNJ11, KCNJ1	6833, 3766, 3767, 3758	SIGNATURE_UP	Homo sapiens	IN_VITRO
acetohexamide	1989	acetohexamide inhibits T CD4+ stimulated with IL4 and anti-IL12 compared to T CD4+	T cell	CL:0000084	T CD4+	CL:0000084	T cell	CL:0000624	T CD4+	CL:0000624	GSE17974_CTRL_VS_ACT_IL4_AND_ANTI_IL12_1H_CD4_TCELL		0.036077133	-99.17941067		APPROVED	ATP channel blocker	ABCC8, KCNJ10, KCNJ11, KCNJ1	6833, 3766, 3767, 3758	SIGNATURE_DOWN	Homo sapiens	EX_VIVO
acetohexamide	1989	acetohexamide inhibits T CD4+ na茂ve compared to T helper 1 stimulated with IL12	T cell	CL:0000084	T CD4+ na茂ve	CL:0000084	T cell	CL:0000895	T helper 1	CL:0000545	GSE20198_UNTREATED_VS_IL12_TREATED_ACT_CD4_TCELL	0.068915787	0.683808829	-99.47683109		APPROVED	ATP channel blocker	ABCC8, KCNJ10, KCNJ11, KCNJ1	6833, 3766, 3767, 3758	SIGNATURE	Homo sapiens	IN_VITRO
acetohexamide	1989	acetohexamide inhibits T regulatory in Colorectal cancer compared to T regulatory	T cell	CL:0000084	T regulatory	CL:0000084	T cell	CL:0000815	T regulatory	CL:0000815	Treg_Tumor_CRC_Adenocarcinoma_vs_Treg_Healthy_Tissue_CRC_Adenocarcinoma	0.717285745	0.108993157	-99.5142003		APPROVED	ATP channel blocker	ABCC8, KCNJ10, KCNJ11, KCNJ1	6833, 3766, 3767, 3758	SIGNATURE	Homo sapiens	UNKNOWN
acetohexamide	1989	acetohexamide inhibits T cell compared to T regulatory	T cell	CL:0000084	T cell	CL:0000084	T cell	CL:0000084	T regulatory	CL:0000815	GSE7460_TCONV_VS_TREG_THYMUS	0.65843957	0.117578382	-99.58893871		APPROVED	ATP channel blocker	ABCC8, KCNJ10, KCNJ11, KCNJ1	6833, 3766, 3767, 3758	SIGNATURE	Homo sapiens	EX_VIVO
acetohexamide	1989	acetohexamide inhibits T helper stimulated with IL12, TGFB, anti-CD3 and anti-CD28 compared to T helper stimulated with anti-CD3 and anti-CD28	T cell	CL:0000084	T helper	CL:0000084	T cell	CL:0000492	T helper	CL:0000492	GSE2770_IL12_AND_TGFB_ACT_VS_ACT_CD4_TCELL_2H	0.03135766	0.429873919	-99.73841555		APPROVED	ATP channel blocker	ABCC8, KCNJ10, KCNJ11, KCNJ1	6833, 3766, 3767, 3758	SIGNATURE	Homo sapiens	EX_VIVO
suloctidil	657255	suloctidil inhibits B cell compared to Plasma cell	B cell	CL:0000236	B cell	CL:0000236	B cell	CL:0000236	Plasma cell	CL:0000786	GSE12366_GC_BCELL_VS_PLASMA_CELL	0.008663867	0.006924068	-95.10463378	0.66418009	WITHDRAWN	adrenergic receptor antagonist			SIGNATURE	Homo sapiens	PATIENT
suloctidil	657255	suloctidil inhibits B cell na茂ve compared to IgM B cell	B cell	CL:0000236	B cell na茂ve	CL:0000236	B cell	CL:0000788	B cell	CL:0000236	GSE22886_NAIVE_VS_IGM_MEMORY_BCELL	0.67224791	0.021450558	-95.10463378	0.66418009	WITHDRAWN	adrenergic receptor antagonist			SIGNATURE	Homo sapiens	IN_SILICO
suloctidil	657255	suloctidil inhibits B cell compared to B cell na茂ve	B cell	CL:0000236	B cell	CL:0000236	B cell	CL:0000236	B cell na茂ve	CL:0000788	GSE12366_GC_VS_NAIVE_BCELL	0.007081128		-95.33756061	0.66418009	WITHDRAWN	adrenergic receptor antagonist			SIGNATURE_UP	Homo sapiens	PATIENT
suloctidil	657255	suloctidil inhibits B cell na茂ve compared to Plasma cell	B cell	CL:0000236	B cell na茂ve	CL:0000236	B cell	CL:0000788	Plasma cell	CL:0000786	GSE22886_NAIVE_BCELL_VS_BM_PLASMA_CELL	0.01757674	0.007341181	-95.73991031	0.66418009	WITHDRAWN	adrenergic receptor antagonist			SIGNATURE	Homo sapiens	IN_SILICO
suloctidil	657255	suloctidil inhibits B cell na茂ve compared to Neutrophil	B cell	CL:0000236	B cell na茂ve	CL:0000775	Neutrophil	CL:0000788	Neutrophil	CL:0000775	GSE22886_NAIVE_BCELL_VS_NEUTROPHIL	0.07766314	0.021450558	-97.19730942	0.66418009	WITHDRAWN	adrenergic receptor antagonist			SIGNATURE	Homo sapiens	IN_SILICO
suloctidil	657255	suloctidil inhibits IgG IgA B cell memory compared to IgM B cell memory	B cell	CL:0000236	B cell memory	CL:0000236	B cell	CL:0000787	B cell memory	CL:0000787	GSE22886_IGA_VS_IGM_MEMORY_BCELL	0.645349126	0.021450558	-97.75784753	0.66418009	WITHDRAWN	adrenergic receptor antagonist			SIGNATURE	Homo sapiens	IN_SILICO
suloctidil	657255	suloctidil inhibits B cell memory compared to CD21 (low) B cell	B cell	CL:0000236	B cell memory	CL:0000236	B cell	CL:0000787	B cell	CL:0000236	GSE17186_MEMORY_VS_CD21LOW_TRANSITIONAL_BCELL	0.726304439	0.236668548	-98.31838565	0.66418009	WITHDRAWN	adrenergic receptor antagonist			SIGNATURE	Homo sapiens	PATIENT
suloctidil	657255	suloctidil inhibits B cell na茂ve compared to Neutrophil	B cell	CL:0000236	B cell na茂ve	CL:0000775	Neutrophil	CL:0000788	Neutrophil	CL:0000775	GSE22886_NAIVE_BCELL_VS_NEUTROPHIL	0.008663867	0.006924068	-98.65470852	0.66418009	WITHDRAWN	adrenergic receptor antagonist			SIGNATURE	Homo sapiens	IN_SILICO
suloctidil	657255	suloctidil inhibits B cell compared to Plasma cell	B cell	CL:0000236	B cell	CL:0000236	B cell	CL:0000236	Plasma cell	CL:0000786	GSE12366_GC_BCELL_VS_PLASMA_CELL	0.009079712	0.007341181	-98.91629297	0.66418009	WITHDRAWN	adrenergic receptor antagonist			SIGNATURE	Homo sapiens	PATIENT
suloctidil	657255	suloctidil inhibits Dendritic cell compared to Dendritic cell stimulated with LPS	Dendritic cell	CL:0000451	Dendritic cell	CL:0000451	Dendritic cell	CL:0000451	Dendritic cell	CL:0000451	GSE14000_UNSTIM_VS_16H_LPS_DC_TRANSLATED_RNA	0.047547235	0.006924068	-95.02989537	0.66418009	WITHDRAWN	adrenergic receptor antagonist			SIGNATURE	Homo sapiens	EX_VIVO
suloctidil	657255	suloctidil inhibits Dendritic cell stimulated with B.malayi compared to Macrophage stimulated with B.malayi	Dendritic cell	CL:0000451	Dendritic cell	CL:0000235	Macrophage	CL:0000451	Macrophage	CL:0000235	GSE360_DC_VS_MAC_B_MALAYI_HIGH_DOSE	0.629879487	0.006924068	-95.1793722	0.66418009	WITHDRAWN	adrenergic receptor antagonist			SIGNATURE	Homo sapiens	IN_VITRO
suloctidil	657255	suloctidil inhibits Dendritic cell compared to Dendritic cell stimulated with Newcastle virus	Dendritic cell	CL:0000451	Dendritic cell	CL:0000451	Dendritic cell	CL:0000451	Dendritic cell	CL:0000451	GSE18791_CTRL_VS_NEWCASTLE_VIRUS_DC_4H	0.009079712	0.007341181	-95.1793722	0.66418009	WITHDRAWN	adrenergic receptor antagonist			SIGNATURE	Homo sapiens	IN_VITRO
suloctidil	657255	suloctidil inhibits T helper 2 compared to Dendritic cell	Dendritic cell	CL:0000451	Dendritic cell	CL:0000084	T cell	CL:0000451	T helper 2	CL:0000546	GSE3982_DC_VS_TH2		0.007081128	-95.31891085	0.66418009	WITHDRAWN	adrenergic receptor antagonist			SIGNATURE_DOWN	Homo sapiens	UNKNOWN
suloctidil	657255	suloctidil inhibits Dendritic cell compared to Dendritic cell stimulated with RARA agonist	Dendritic cell	CL:0000451	Dendritic cell	CL:0000451	Dendritic cell	CL:0000451	Dendritic cell	CL:0000451	GSE5679_CTRL_VS_RARA_AGONIST_AM580_TREATED_DC	0.007081128		-95.35621037	0.66418009	WITHDRAWN	adrenergic receptor antagonist			SIGNATURE_UP	Homo sapiens	EX_VIVO
suloctidil	657255	suloctidil inhibits Dendritic cell compared to Dendritic cell stimulated with Rosiglitazone	Dendritic cell	CL:0000451	Dendritic cell	CL:0000451	Dendritic cell	CL:0000451	Dendritic cell	CL:0000451	GSE5679_CTRL_VS_PPARG_LIGAND_ROSIGLITAZONE_TREATED_DC	0.009079712	0.064121406	-95.36621824	0.66418009	WITHDRAWN	adrenergic receptor antagonist			SIGNATURE	Homo sapiens	EX_VIVO
suloctidil	657255	suloctidil inhibits Dendritic cell compared to Dendritic cell stimulated with LPS	Dendritic cell	CL:0000451	Dendritic cell	CL:0000451	Dendritic cell	CL:0000451	Dendritic cell	CL:0000451	GSE14000_UNSTIM_VS_16H_LPS_DC	0.465941348	0.006924068	-95.40358744	0.66418009	WITHDRAWN	adrenergic receptor antagonist			SIGNATURE	Homo sapiens	EX_VIVO
suloctidil	657255	suloctidil inhibits Dendritic cell compared to Dendritic cell stimulated with Newcastle virus	Dendritic cell	CL:0000451	Dendritic cell	CL:0000451	Dendritic cell	CL:0000451	Dendritic cell	CL:0000451	GSE18791_CTRL_VS_NEWCASTLE_VIRUS_DC_10H	0.009079712	0.007341181	-95.70254111	0.66418009	WITHDRAWN	adrenergic receptor antagonist			SIGNATURE	Homo sapiens	IN_VITRO
suloctidil	657255	suloctidil inhibits Dendritic cell compared to Dendritic cell stimulated with Rosiglitazone	Dendritic cell	CL:0000451	Dendritic cell	CL:0000451	Dendritic cell	CL:0000451	Dendritic cell	CL:0000451	GSE5679_CTRL_VS_PPARG_LIGAND_ROSIGLITAZONE_TREATED_DC	0.007081128		-95.82245431	0.66418009	WITHDRAWN	adrenergic receptor antagonist			SIGNATURE_UP	Homo sapiens	EX_VIVO
suloctidil	657255	suloctidil inhibits Dendritic cell compared to Dendritic cell stimulated with R848	Dendritic cell	CL:0000451	Dendritic cell	CL:0000451	Dendritic cell	CL:0000451	Dendritic cell	CL:0000451	GSE2706_UNSTIM_VS_2H_R848_DC	0.451622822	0.007341181	-96.18834081	0.66418009	WITHDRAWN	adrenergic receptor antagonist			SIGNATURE	Homo sapiens	EX_VIVO
suloctidil	657255	suloctidil inhibits Dendritic cell compared to Dendritic cell stimulated with LPS	Dendritic cell	CL:0000451	Dendritic cell	CL:0000451	Dendritic cell	CL:0000451	Dendritic cell	CL:0000451	GSE22886_CTRL_VS_LPS_24H_DC	0.008663867	0.006924068	-96.44992526	0.66418009	WITHDRAWN	adrenergic receptor antagonist			SIGNATURE	Homo sapiens	IN_SILICO
suloctidil	657255	suloctidil inhibits Dendritic cell compared to Dendritic cell stimulated with LPS	Dendritic cell	CL:0000451	Dendritic cell	CL:0000451	Dendritic cell	CL:0000451	Dendritic cell	CL:0000451	GSE14000_UNSTIM_VS_4H_LPS_DC	0.008663867	0.006924068	-96.48729447	0.66418009	WITHDRAWN	adrenergic receptor antagonist			SIGNATURE	Homo sapiens	EX_VIVO
suloctidil	657255	suloctidil inhibits Dendritic cell compared to Dendritic cell stimulated with Newcastle virus	Dendritic cell	CL:0000451	Dendritic cell	CL:0000451	Dendritic cell	CL:0000451	Dendritic cell	CL:0000451	GSE18791_CTRL_VS_NEWCASTLE_VIRUS_DC_4H	0.008663867	0.006924068	-96.56203288	0.66418009	WITHDRAWN	adrenergic receptor antagonist			SIGNATURE	Homo sapiens	IN_VITRO
suloctidil	657255	suloctidil inhibits Dendritic cell stimulated with B.malayi compared to Macrophage stimulated with B.malayi	Dendritic cell	CL:0000451	Dendritic cell	CL:0000235	Macrophage	CL:0000451	Macrophage	CL:0000235	GSE360_DC_VS_MAC_B_MALAYI_LOW_DOSE	0.565297352	0.012483148	-96.67414051	0.66418009	WITHDRAWN	adrenergic receptor antagonist			SIGNATURE	Homo sapiens	IN_VITRO
suloctidil	657255	suloctidil inhibits Dendritic cell compared to Dendritic cell stimulated with LPS	Dendritic cell	CL:0000451	Dendritic cell	CL:0000451	Dendritic cell	CL:0000451	Dendritic cell	CL:0000451	GSE22886_CTRL_VS_LPS_24H_DC	0.009079712	0.007341181	-96.86098655	0.66418009	WITHDRAWN	adrenergic receptor antagonist			SIGNATURE	Homo sapiens	IN_SILICO
suloctidil	657255	suloctidil inhibits Dendritic cell compared to Dendritic cell stimulated with LPS	Dendritic cell	CL:0000451	Dendritic cell	CL:0000451	Dendritic cell	CL:0000451	Dendritic cell	CL:0000451	GSE14000_UNSTIM_VS_4H_LPS_DC	0.009079712	0.007341181	-96.93572496	0.66418009	WITHDRAWN	adrenergic receptor antagonist			SIGNATURE	Homo sapiens	EX_VIVO
suloctidil	657255	suloctidil inhibits Dendritic cell compared to Dendritic cell stimulated with LPS	Dendritic cell	CL:0000451	Dendritic cell	CL:0000451	Dendritic cell	CL:0000451	Dendritic cell	CL:0000451	GSE2706_UNSTIM_VS_8H_LPS_DC	0.033162399	0.006924068	-96.97309417	0.66418009	WITHDRAWN	adrenergic receptor antagonist			SIGNATURE	Homo sapiens	EX_VIVO
suloctidil	657255	suloctidil inhibits Dendritic cell stimulated with T.gondii compared to Macrophage stimulated with T.gondii	Dendritic cell	CL:0000451	Dendritic cell	CL:0000235	Macrophage	CL:0000451	Macrophage	CL:0000235	GSE360_DC_VS_MAC_T_GONDII	0.855208953	0.021450558	-97.15994021	0.66418009	WITHDRAWN	adrenergic receptor antagonist			SIGNATURE	Homo sapiens	IN_VITRO
suloctidil	657255	suloctidil inhibits Dendritic cell stimulated with LPS compared to Dendritic cell	Dendritic cell	CL:0000451	Dendritic cell	CL:0000451	Dendritic cell	CL:0000451	Dendritic cell	CL:0000451	GSE14000_TRANSLATED_RNA_VS_MRNA_4H_LPS_DC		0.022689573	-97.2771354	0.66418009	WITHDRAWN	adrenergic receptor antagonist			SIGNATURE_DOWN	Homo sapiens	EX_VIVO
suloctidil	657255	suloctidil inhibits Dendritic cell compared to Dendritic cell stimulated with LPS	Dendritic cell	CL:0000451	Dendritic cell	CL:0000451	Dendritic cell	CL:0000451	Dendritic cell	CL:0000451	GSE2706_UNSTIM_VS_8H_LPS_DC	0.013645264	0.007341181	-97.34678625	0.66418009	WITHDRAWN	adrenergic receptor antagonist			SIGNATURE	Homo sapiens	EX_VIVO
suloctidil	657255	suloctidil inhibits Dendritic cell compared to Dendritic cell stimulated with LPS	Dendritic cell	CL:0000451	Dendritic cell	CL:0000451	Dendritic cell	CL:0000451	Dendritic cell	CL:0000451	GSE14000_UNSTIM_VS_16H_LPS_DC	0.070552328	0.007341181	-97.38415546	0.66418009	WITHDRAWN	adrenergic receptor antagonist			SIGNATURE	Homo sapiens	EX_VIVO
suloctidil	657255	suloctidil inhibits Dendritic cell compared to Dendritic cell stimulated with SIV and HIV	Dendritic cell	CL:0000451	Dendritic cell	CL:0000451	Dendritic cell	CL:0000451	Dendritic cell	CL:0000451	GSE22589_HEALTHY_VS_HIV_AND_SIV_INFECTED_DC	0.051335766	0.658282341	-97.83258595	0.66418009	WITHDRAWN	adrenergic receptor antagonist			SIGNATURE	Homo sapiens	IN_VITRO
suloctidil	657255	suloctidil inhibits Dendritic cell stimulated with LPS-like compared to Dendritic cell stimulated with LPS and LPS-like	Dendritic cell	CL:0000451	Dendritic cell	CL:0000451	Dendritic cell	CL:0000451	Dendritic cell	CL:0000451	GSE4748_CYANOBACTERIUM_LPSLIKE_VS_LPS_AND_CYANOBACTERIUM_LPSLIKE_STIM_DC_3H	0.154734752	0.006924068	-97.98206278	0.66418009	WITHDRAWN	adrenergic receptor antagonist			SIGNATURE	Homo sapiens	IN_VITRO
suloctidil	657255	suloctidil inhibits Dendritic cell compared to Dendritic cell stimulated with R848 and LPS	Dendritic cell	CL:0000451	Dendritic cell	CL:0000451	Dendritic cell	CL:0000451	Dendritic cell	CL:0000451	GSE2706_UNSTIM_VS_8H_LPS_AND_R848_DC	0.009079712	0.007341181	-98.50523169	0.66418009	WITHDRAWN	adrenergic receptor antagonist			SIGNATURE	Homo sapiens	EX_VIVO
suloctidil	657255	suloctidil inhibits Dendritic cell compared to Dendritic cell stimulated with R848 and LPS	Dendritic cell	CL:0000451	Dendritic cell	CL:0000451	Dendritic cell	CL:0000451	Dendritic cell	CL:0000451	GSE2706_UNSTIM_VS_8H_LPS_AND_R848_DC	0.008663867	0.006924068	-99.0284006	0.66418009	WITHDRAWN	adrenergic receptor antagonist			SIGNATURE	Homo sapiens	EX_VIVO
suloctidil	657255	suloctidil inhibits Dendritic cell compared to Dendritic cell stimulated with SIV and HIV	Dendritic cell	CL:0000451	Dendritic cell	CL:0000451	Dendritic cell	CL:0000451	Dendritic cell	CL:0000451	GSE22589_HEALTHY_VS_HIV_AND_SIV_INFECTED_DC	0.008663867	0.030701218	-99.92526158	0.66418009	WITHDRAWN	adrenergic receptor antagonist			SIGNATURE	Homo sapiens	IN_VITRO
suloctidil	657255	suloctidil inhibits Dendritic cell compared to Dendritic cell stimulated with SIV and HIV	Dendritic cell	CL:0000451	Dendritic cell	CL:0000451	Dendritic cell	CL:0000451	Dendritic cell	CL:0000451	GSE22589_HEALTHY_VS_HIV_AND_SIV_INFECTED_DC	0.009079712	0.026253002	-99.96263079	0.66418009	WITHDRAWN	adrenergic receptor antagonist			SIGNATURE	Homo sapiens	IN_VITRO
suloctidil	657255	suloctidil inhibits Macrophage compared to Macrophage stimulated with LPS	Macrophage	CL:0000235	Macrophage	CL:0000235	Macrophage	CL:0000235	Macrophage	CL:0000235	GSE3982_CTRL_VS_LPS_4H_MAC	0.008663867	0.006924068	-95.62780269	0.66418009	WITHDRAWN	adrenergic receptor antagonist			SIGNATURE	Homo sapiens	UNKNOWN
suloctidil	657255	suloctidil inhibits Macrophage compared to Macrophage stimulated with LPS	Macrophage	CL:0000235	Macrophage	CL:0000235	Macrophage	CL:0000235	Macrophage	CL:0000235	GSE3982_CTRL_VS_LPS_4H_MAC	0.009079712	0.007341181	-95.81464873	0.66418009	WITHDRAWN	adrenergic receptor antagonist			SIGNATURE	Homo sapiens	UNKNOWN
suloctidil	657255	suloctidil inhibits Macrophage stimulated with CSF11IFNg compared to Macrophage stimulated with CSF1, IFNg and Pam3Cys	Macrophage	CL:0000235	Macrophage	CL:0000235	Macrophage	CL:0000235	Macrophage	CL:0000235	GSE11864_CSF1_IFNG_VS_CSF1_IFNG_PAM3CYS_IN_MAC	0.009079712	0.007341181	-96.11360239	0.66418009	WITHDRAWN	adrenergic receptor antagonist			SIGNATURE	Homo sapiens	IN_VITRO
suloctidil	657255	suloctidil inhibits Macrophage stimulated with CSF1 compared to Macrophage stimulated with CSF1, IFNg and Pam3Cys	Macrophage	CL:0000235	Macrophage	CL:0000235	Macrophage	CL:0000235	Macrophage	CL:0000235	GSE11864_CSF1_VS_CSF1_IFNG_PAM3CYS_IN_MAC	0.087538102	0.007341181	-96.30044843	0.66418009	WITHDRAWN	adrenergic receptor antagonist			SIGNATURE	Homo sapiens	IN_VITRO
suloctidil	657255	suloctidil inhibits Macrophage stimulated with CSF11IFNg compared to Macrophage stimulated with CSF1, IFNg and Pam3Cys	Macrophage	CL:0000235	Macrophage	CL:0000235	Macrophage	CL:0000235	Macrophage	CL:0000235	GSE11864_CSF1_IFNG_VS_CSF1_IFNG_PAM3CYS_IN_MAC	0.008663867	0.006924068	-96.82361734	0.66418009	WITHDRAWN	adrenergic receptor antagonist			SIGNATURE	Homo sapiens	IN_VITRO
suloctidil	657255	suloctidil inhibits Macrophage stimulated with L.donovani compared to Macrophage stimulated with B.malayi	Macrophage	CL:0000235	Macrophage	CL:0000235	Macrophage	CL:0000235	Macrophage	CL:0000235	GSE360_L_DONOVANI_VS_B_MALAYI_LOW_DOSE_MAC	0.273900569	0.230848861	-97.90732436	0.66418009	WITHDRAWN	adrenergic receptor antagonist			SIGNATURE	Homo sapiens	IN_VITRO
suloctidil	657255	suloctidil inhibits Macrophage stimulated with CSF1 compared to Macrophage stimulated with CSF1, IFNg and Pam3Cys	Macrophage	CL:0000235	Macrophage	CL:0000235	Macrophage	CL:0000235	Macrophage	CL:0000235	GSE11864_CSF1_VS_CSF1_IFNG_PAM3CYS_IN_MAC	0.338725602	0.006924068	-98.24364723	0.66418009	WITHDRAWN	adrenergic receptor antagonist			SIGNATURE	Homo sapiens	IN_VITRO
suloctidil	657255	suloctidil inhibits Macrophage compared to Macrophage stimulated with CSF1 and IFNg	Macrophage	CL:0000235	Macrophage	CL:0000235	Macrophage	CL:0000235	Macrophage	CL:0000235	GSE11864_UNTREATED_VS_CSF1_IFNG_IN_MAC	0.506607096	0.044502835	-98.43049327	0.66418009	WITHDRAWN	adrenergic receptor antagonist			SIGNATURE	Homo sapiens	IN_VITRO
suloctidil	657255	suloctidil inhibits Macrophage compared to Macrophage stimulated with Rosiglitazone	Macrophage	CL:0000235	Macrophage	CL:0000235	Macrophage	CL:0000235	Macrophage	CL:0000235	GSE16385_UNTREATED_VS_12H_ROSIGLITAZONE_TREATED_MACROPHAGE	0.574059406	0.066321346	-98.80418535	0.66418009	WITHDRAWN	adrenergic receptor antagonist			SIGNATURE	Homo sapiens	EX_VIVO
suloctidil	657255	suloctidil inhibits Monocyte in Breast invasive carcinom compared to Monocyte in Breast invasive carcinom	Monocyte	CL:0000576	Monocyte	CL:0000576	Monocyte	CL:0000576	Monocyte	CL:0000576	Casseta_TumorEducatedMonocyte_vs_Monocyte_BRCA	0.425957944	0.007341181	-95.29147982	0.66418009	WITHDRAWN	adrenergic receptor antagonist			SIGNATURE	Homo sapiens	PATIENT
suloctidil	657255	suloctidil inhibits CD16+ Monocyte compared to Dendritic cell	Monocyte	CL:0000576	Monocyte	CL:0000451	Dendritic cell	CL:0000576	Dendritic cell	CL:0000451	GSE34515_CD16_POS_MONOCYTE_VS_DC	0.649389963	0.021450558	-95.40358744	0.66418009	WITHDRAWN	adrenergic receptor antagonist			SIGNATURE	Homo sapiens	IN_VITRO
suloctidil	657255	suloctidil inhibits Monocyte compared to Macrophage stimulated with IL4 and Rosiglitazone	Monocyte	CL:0000576	Monocyte	CL:0000235	Macrophage	CL:0000576	Macrophage	CL:0000235	GSE16385_MONOCYTE_VS_12H_ROSIGLITAZONE_IL4_TREATED_MACROPHAGE	0.026849274	0.109425973	-96.1509716	0.66418009	WITHDRAWN	adrenergic receptor antagonist			SIGNATURE	Homo sapiens	EX_VIVO
suloctidil	657255	suloctidil inhibits Monocyte compared to Monocyte stimulated with Muramyl Dipeptide	Monocyte	CL:0000576	Monocyte	CL:0000576	Monocyte	CL:0000576	Monocyte	CL:0000576	GSE34156_UNTREATED_VS_24H_NOD2_LIGAND_TREATED_MONOCYTE	0.601820557	0.006924068	-97.57100149	0.66418009	WITHDRAWN	adrenergic receptor antagonist			SIGNATURE	Homo sapiens	IN_VITRO
suloctidil	657255	suloctidil inhibits Monocyte compared to Macrophage stimulated with IL4 and Rosiglitazone	Monocyte	CL:0000576	Monocyte	CL:0000235	Macrophage	CL:0000576	Macrophage	CL:0000235	GSE16385_MONOCYTE_VS_12H_ROSIGLITAZONE_IL4_TREATED_MACROPHAGE	0.141358436	0.103552357	-98.13153961	0.66418009	WITHDRAWN	adrenergic receptor antagonist			SIGNATURE	Homo sapiens	EX_VIVO
suloctidil	657255	suloctidil inhibits Monocyte compared to Monocyte in Arthritis	Monocyte	CL:0000576	Monocyte	CL:0000576	Monocyte	CL:0000576	Monocyte	CL:0000576	GSE38351_RA_GPL96_Monocytes		0.022689573	-99.77620291	0.66418009	WITHDRAWN	adrenergic receptor antagonist			SIGNATURE_DOWN	Homo sapiens	PATIENT
suloctidil	657255	suloctidil inhibits Neutrophil stimulated with A.phagocytophilum compared to Neutrophil	Neutrophil	CL:0000775	Neutrophil	CL:0000775	Neutrophil	CL:0000775	Neutrophil	CL:0000775	GSE2405_0H_VS_9H_A_PHAGOCYTOPHILUM_STIM_NEUTROPHIL		0.009801305	-95.44945916	0.66418009	WITHDRAWN	adrenergic receptor antagonist			SIGNATURE_DOWN	Homo sapiens	EX_VIVO
suloctidil	657255	suloctidil inhibits Neutrophil stimulated with LPS compared to Neutrophil stimulated with IFNg and GM-CSF	Neutrophil	CL:0000775	Neutrophil	CL:0000775	Neutrophil	CL:0000775	Neutrophil	CL:0000775	GSE22103_LPS_VS_GMCSF_AND_IFNG_STIM_NEUTROPHIL	0.368998291	0.006924068	-96.22571001	0.66418009	WITHDRAWN	adrenergic receptor antagonist			SIGNATURE	Homo sapiens	IN_VIVO
suloctidil	657255	suloctidil inhibits Neutrophil compared to Neutrophil stimulated with F.tularensis	Neutrophil	CL:0000775	Neutrophil	CL:0000775	Neutrophil	CL:0000775	Neutrophil	CL:0000775	GSE37416_CTRL_VS_6H_F_TULARENSIS_LVS_NEUTROPHIL	0.502012736	0.007341181	-96.6367713	0.66418009	WITHDRAWN	adrenergic receptor antagonist			SIGNATURE	Homo sapiens	IN_VITRO
suloctidil	657255	suloctidil inhibits Neutrophil compared to Neutrophil stimulated with S.aureus	Neutrophil	CL:0000775	Neutrophil	CL:0000775	Neutrophil	CL:0000775	Neutrophil	CL:0000775	GSE2405_S_AUREUS_VS_UNTREATED_NEUTROPHIL		0.007081128	-96.96008952	0.66418009	WITHDRAWN	adrenergic receptor antagonist			SIGNATURE_DOWN	Homo sapiens	EX_VIVO
suloctidil	657255	suloctidil inhibits Neutrophil stimulated with LPS compared to Neutrophil stimulated with IFNg and GM-CSF	Neutrophil	CL:0000775	Neutrophil	CL:0000775	Neutrophil	CL:0000775	Neutrophil	CL:0000775	GSE22103_LPS_VS_GMCSF_AND_IFNG_STIM_NEUTROPHIL	0.074480225	0.007341181	-98.39312407	0.66418009	WITHDRAWN	adrenergic receptor antagonist			SIGNATURE	Homo sapiens	IN_VIVO
suloctidil	657255	suloctidil inhibits Neutrophil compared to Neutrophil stimulated with F.tularensis	Neutrophil	CL:0000775	Neutrophil	CL:0000775	Neutrophil	CL:0000775	Neutrophil	CL:0000775	GSE37416_0H_VS_3H_F_TULARENSIS_LVS_NEUTROPHIL	0.779200869	0.006924068	-98.84155456	0.66418009	WITHDRAWN	adrenergic receptor antagonist			SIGNATURE	Homo sapiens	IN_VITRO
suloctidil	657255	suloctidil inhibits Neutrophil compared to Neutrophil stimulated with F.tularensis	Neutrophil	CL:0000775	Neutrophil	CL:0000775	Neutrophil	CL:0000775	Neutrophil	CL:0000775	GSE37416_CTRL_VS_24H_F_TULARENSIS_LVS_NEUTROPHIL	0.350218805	0.006924068	-99.25261584	0.66418009	WITHDRAWN	adrenergic receptor antagonist			SIGNATURE	Homo sapiens	IN_VITRO
suloctidil	657255	suloctidil inhibits Neutrophil compared to Neutrophil stimulated with F.tularensis	Neutrophil	CL:0000775	Neutrophil	CL:0000775	Neutrophil	CL:0000775	Neutrophil	CL:0000775	GSE37416_CTRL_VS_24H_F_TULARENSIS_LVS_NEUTROPHIL	0.026394854	0.007341181	-99.81315396	0.66418009	WITHDRAWN	adrenergic receptor antagonist			SIGNATURE	Homo sapiens	IN_VITRO
suloctidil	657255	suloctidil inhibits Neutrophil compared to Neutrophil stimulated with F.tularensis	Neutrophil	CL:0000775	Neutrophil	CL:0000775	Neutrophil	CL:0000775	Neutrophil	CL:0000775	GSE37416_0H_VS_3H_F_TULARENSIS_LVS_NEUTROPHIL	0.071596747	0.007341181	-99.92526158	0.66418009	WITHDRAWN	adrenergic receptor antagonist			SIGNATURE	Homo sapiens	IN_VITRO
suloctidil	657255	suloctidil inhibits PBMC compared to PBMC stimulated with RSV	PBMC	CL:2000001	PBMC	CL:2000001	PBMC	CL:2000001	PBMC	CL:2000001	GSE34205_HEALTHY_VS_RSV_INF_INFANT_PBMC	0.071318452	0.006924068	-95.32884903	0.66418009	WITHDRAWN	adrenergic receptor antagonist			SIGNATURE	Homo sapiens	PATIENT
suloctidil	657255	suloctidil inhibits PBMC stimulated with E.coli compared to PBMC stimulated with S.pneumo	PBMC	CL:2000001	PBMC	CL:2000001	PBMC	CL:2000001	PBMC	CL:2000001	GSE6269_E_COLI_VS_STREP_PNEUMO_INF_PBMC	0.216204279	0.006924068	-95.51569507	0.66418009	WITHDRAWN	adrenergic receptor antagonist			SIGNATURE	Homo sapiens	PATIENT
suloctidil	657255	suloctidil inhibits PBMC compared to PBMC stimulated with RSV	PBMC	CL:2000001	PBMC	CL:2000001	PBMC	CL:2000001	PBMC	CL:2000001	GSE34205_HEALTHY_VS_RSV_INF_INFANT_PBMC	0.009079712	0.03770873	-95.62780269	0.66418009	WITHDRAWN	adrenergic receptor antagonist			SIGNATURE	Homo sapiens	PATIENT
suloctidil	657255	suloctidil inhibits PBMC compared to PBMC stimulated with Influenza	PBMC	CL:2000001	PBMC	CL:2000001	PBMC	CL:2000001	PBMC	CL:2000001	GSE34205_HEALTHY_VS_FLU_INF_INFANT_PBMC	0.030766401	0.007341181	-95.6651719	0.66418009	WITHDRAWN	adrenergic receptor antagonist			SIGNATURE	Homo sapiens	PATIENT
suloctidil	657255	suloctidil inhibits PBMC compared to PBMC stimulated with S.pneumo	PBMC	CL:2000001	PBMC	CL:2000001	PBMC	CL:2000001	PBMC	CL:2000001	GSE6269_HEALTHY_VS_STAPH_PNEUMO_INF_PBMC	0.128055127	0.007341181	-95.96412556	0.66418009	WITHDRAWN	adrenergic receptor antagonist			SIGNATURE	Homo sapiens	PATIENT
suloctidil	657255	suloctidil inhibits PBMC compared to PBMC stimulated with RSV	PBMC	CL:2000001	PBMC	CL:2000001	PBMC	CL:2000001	PBMC	CL:2000001	GSE34205_HEALTHY_VS_RSV_INF_INFANT_PBMC	0.649556352	0.021450558	-95.96412556	0.66418009	WITHDRAWN	adrenergic receptor antagonist			SIGNATURE	Homo sapiens	PATIENT
suloctidil	657255	suloctidil inhibits PBMC stimulated with immunosuppressive therapy in Organ Transplant compared to PBMC	PBMC	CL:2000001	PBMC	CL:2000001	PBMC	CL:2000001	PBMC	CL:2000001	GSE22229_RENAL_TRANSPLANT_IMMUNOSUPP_THERAPY_VS_HEALTHY_PBMC	0.176	0.006924068	-96.89835575	0.66418009	WITHDRAWN	adrenergic receptor antagonist			SIGNATURE	Homo sapiens	PATIENT
suloctidil	657255	suloctidil inhibits PBMC stimulated with E.coli compared to PBMC stimulated with S.pneumo	PBMC	CL:2000001	PBMC	CL:2000001	PBMC	CL:2000001	PBMC	CL:2000001	GSE6269_E_COLI_VS_STREP_PNEUMO_INF_PBMC	0.034706371	0.007341181	-97.122571	0.66418009	WITHDRAWN	adrenergic receptor antagonist			SIGNATURE	Homo sapiens	PATIENT
suloctidil	657255	suloctidil inhibits PBMC stimulated with YF17D Vaccine (1 day) compared to PBMC stimulated with YF17D Vaccine (3 days)	PBMC	CL:2000001	PBMC	CL:2000001	PBMC	CL:2000001	PBMC	CL:2000001	GSE13485_DAY1_VS_DAY3_YF17D_VACCINE_PBMC	0.041866094		-97.31443491	0.66418009	WITHDRAWN	adrenergic receptor antagonist			SIGNATURE_UP	Homo sapiens	PATIENT
suloctidil	657255	suloctidil inhibits PBMC compared to PBMC stimulated with Influenza	PBMC	CL:2000001	PBMC	CL:2000001	PBMC	CL:2000001	PBMC	CL:2000001	GSE34205_HEALTHY_VS_FLU_INF_INFANT_PBMC	0.085385447	0.006924068	-97.64573991	0.66418009	WITHDRAWN	adrenergic receptor antagonist			SIGNATURE	Homo sapiens	PATIENT
suloctidil	657255	suloctidil inhibits PBMC compared to PBMC stimulated with gram positive bacteria	PBMC	CL:2000001	PBMC	CL:2000001	PBMC	CL:2000001	PBMC	CL:2000001	GSE9960_HEALTHY_VS_GRAM_POS_SEPSIS_PBMC	0.134688246	0.006924068	-98.0941704	0.66418009	WITHDRAWN	adrenergic receptor antagonist			SIGNATURE	Homo sapiens	PATIENT
suloctidil	657255	suloctidil inhibits PBMC compared to PBMC stimulated with CSF3	PBMC	CL:2000001	PBMC	CL:2000001	PBMC	CL:2000001	PBMC	CL:2000001	GSE7400_CTRL_VS_CSF3_IN_VIVO_TREATED_PBMC	0.017556175	0.152681628	-98.16890882	0.66418009	WITHDRAWN	adrenergic receptor antagonist			SIGNATURE	Homo sapiens	IN_VIVO
suloctidil	657255	suloctidil inhibits PBMC stimulated with Influenza compared to PBMC stimulated with S.aureus	PBMC	CL:2000001	PBMC	CL:2000001	PBMC	CL:2000001	PBMC	CL:2000001	GSE6269_FLU_VS_STAPH_AUREUS_INF_PBMC	0.325708561	0.007341181	-98.24364723	0.66418009	WITHDRAWN	adrenergic receptor antagonist			SIGNATURE	Homo sapiens	PATIENT
suloctidil	657255	suloctidil inhibits PBMC stimulated with Influenza compared to PBMC stimulated with S.aureus	PBMC	CL:2000001	PBMC	CL:2000001	PBMC	CL:2000001	PBMC	CL:2000001	GSE6269_FLU_VS_STAPH_AUREUS_INF_PBMC	0.785499542	0.006924068	-98.35575486	0.66418009	WITHDRAWN	adrenergic receptor antagonist			SIGNATURE	Homo sapiens	PATIENT
suloctidil	657255	suloctidil inhibits PBMC compared to PBMC in Lupus erythematosus	PBMC	CL:2000001	PBMC	CL:2000001	PBMC	CL:2000001	PBMC	CL:2000001	GSE11907_SLE_GPL97_PBMCs		0.20808415	-98.61991794	0.66418009	WITHDRAWN	adrenergic receptor antagonist			SIGNATURE_DOWN	Homo sapiens	PATIENT
suloctidil	657255	suloctidil inhibits PBMC compared to PBMC stimulated with gram positive bacteria	PBMC	CL:2000001	PBMC	CL:2000001	PBMC	CL:2000001	PBMC	CL:2000001	GSE9960_HEALTHY_VS_GRAM_POS_SEPSIS_PBMC	0.009079712	0.007341181	-98.95366218	0.66418009	WITHDRAWN	adrenergic receptor antagonist			SIGNATURE	Homo sapiens	PATIENT
suloctidil	657255	suloctidil inhibits PBMC compared to PBMC stimulated with Influenza	PBMC	CL:2000001	PBMC	CL:2000001	PBMC	CL:2000001	PBMC	CL:2000001	GSE6269_HEALTHY_VS_FLU_INF_PBMC	0.228008827	0.021450558	-99.0284006	0.66418009	WITHDRAWN	adrenergic receptor antagonist			SIGNATURE	Homo sapiens	PATIENT
suloctidil	657255	suloctidil inhibits PBMC compared to PBMC stimulated with Influenza	PBMC	CL:2000001	PBMC	CL:2000001	PBMC	CL:2000001	PBMC	CL:2000001	GSE6269_HEALTHY_VS_FLU_INF_PBMC	0.478647643	0.006924068	-99.32735426	0.66418009	WITHDRAWN	adrenergic receptor antagonist			SIGNATURE	Homo sapiens	PATIENT
suloctidil	657255	suloctidil inhibits T CD4+ na茂ve compared to PBMC	T cell	CL:0000084	T CD4+ na茂ve	CL:2000001	PBMC	CL:0000895	PBMC	CL:2000001	GSE11057_NAIVE_CD4_VS_PBMC_CD4_TCELL	0.589577069	0.006924068	-95.06726457	0.66418009	WITHDRAWN	adrenergic receptor antagonist			SIGNATURE	Homo sapiens	IN_VIVO
suloctidil	657255	suloctidil inhibits T CD8+ na茂ve compared to Monocyte	T cell	CL:0000084	T CD8+ na茂ve	CL:0000576	Monocyte	CL:0000898	Monocyte	CL:0000576	GSE22886_NAIVE_CD8_TCELL_VS_MONOCYTE	0.886216536	0.006924068	-95.25411061	0.66418009	WITHDRAWN	adrenergic receptor antagonist			SIGNATURE	Homo sapiens	IN_SILICO
suloctidil	657255	suloctidil inhibits old T CD4+ memory stimulated with TSST compared to old T CD4+ memory	T cell	CL:0000084	T CD4+ memory	CL:0000084	T cell	CL:0000897	T CD4+ memory	CL:0000897	GSE36476_CTRL_VS_TSST_ACT_72H_MEMORY_CD4_TCELL_OLD		0.007081128	-95.58000746	0.66418009	WITHDRAWN	adrenergic receptor antagonist			SIGNATURE_DOWN	Homo sapiens	EX_VIVO
suloctidil	657255	suloctidil inhibits T CD4+ in Lupus erythematosus compared to Myeloid in Lupus erythematosus	T cell	CL:0000084	T CD4+		Other	CL:0000624	Myeloid	CL:0000763	GSE10325_LUPUS_CD4_TCELL_VS_LUPUS_MYELOID	0.6634231	0.021450558	-95.62780269	0.66418009	WITHDRAWN	adrenergic receptor antagonist			SIGNATURE	Homo sapiens	PATIENT
suloctidil	657255	suloctidil inhibits T CD4+ na茂ve compared to T helper stimulated with IL4, TGFB, anti-CD3 and anti-CD28	T cell	CL:0000084	T CD4+ na茂ve	CL:0000084	T cell	CL:0000895	T helper	CL:0000492	GSE2770_UNTREATED_VS_TGFB_AND_IL4_TREATED_ACT_CD4_TCELL_48H	0.427367899	0.230848861	-95.73991031	0.66418009	WITHDRAWN	adrenergic receptor antagonist			SIGNATURE	Homo sapiens	EX_VIVO
suloctidil	657255	suloctidil inhibits CD25+ T regulatory stimulated with IL4 compared to CD25- T cell stimulated with IL4	T cell	CL:0000084	T regulatory	CL:0000084	T cell	CL:0000815	T cell	CL:0000084	GSE24634_TREG_VS_TCONV_POST_DAY7_IL4_CONVERSION	0.009801305		-95.74785528	0.66418009	WITHDRAWN	adrenergic receptor antagonist			SIGNATURE_UP	Homo sapiens	EX_VIVO
suloctidil	657255	suloctidil inhibits young T CD4+ memory stimulated with TSST compared to young T CD4+ memory	T cell	CL:0000084	T CD4+ memory	CL:0000084	T cell	CL:0000897	T CD4+ memory	CL:0000897	GSE36476_CTRL_VS_TSST_ACT_72H_MEMORY_CD4_TCELL_YOUNG		0.007081128	-95.78515479	0.66418009	WITHDRAWN	adrenergic receptor antagonist			SIGNATURE_DOWN	Homo sapiens	EX_VIVO
suloctidil	657255	suloctidil inhibits activated T CD4+ compared to NK cell	T cell	CL:0000084	T CD4+	CL:0000623	NK cell	CL:0000624	NK cell	CL:0000623	GSE28726_ACT_CD4_TCELL_VS_ACT_NKTCELL	0.009079712	0.007341181	-95.85201794	0.66418009	WITHDRAWN	adrenergic receptor antagonist			SIGNATURE	Homo sapiens	IN_VITRO
suloctidil	657255	suloctidil inhibits CD25+ T regulatory stimulated with IL4 compared to CD25- T cell stimulated with IL4	T cell	CL:0000084	T regulatory	CL:0000084	T cell	CL:0000815	T cell	CL:0000084	GSE24634_TREG_VS_TCONV_POST_DAY7_IL4_CONVERSION	0.009079712	0.007341181	-96.22571001	0.66418009	WITHDRAWN	adrenergic receptor antagonist			SIGNATURE	Homo sapiens	EX_VIVO
suloctidil	657255	suloctidil inhibits CD25+ T CD4+ effector compared to CD25- T cell	T cell	CL:0000084	T CD4+ effector	CL:0000084	T cell	CL:0001044	T cell	CL:0000084	GSE24634_TEFF_VS_TCONV_DAY3_IN_CULTURE	0.007081128		-96.23274897	0.66418009	WITHDRAWN	adrenergic receptor antagonist			SIGNATURE_UP	Homo sapiens	EX_VIVO
suloctidil	657255	suloctidil inhibits VD1 T cell gamma/delta compared to VD2 T cell gamma/delta	T cell	CL:0000084	T cell gamma/delta	CL:0000084	T cell	CL:0000798	T cell gamma/delta	CL:0000798	GSE3720_VD1_VS_VD2_GAMMADELTA_TCELL	0.483321273	0.955387098	-96.37518685	0.66418009	WITHDRAWN	adrenergic receptor antagonist			SIGNATURE	Homo sapiens	IN_VIVO
suloctidil	657255	suloctidil inhibits old T CD4+ memory stimulated with TSST compared to old T CD4+ memory	T cell	CL:0000084	T CD4+ memory	CL:0000084	T cell	CL:0000897	T CD4+ memory	CL:0000897	GSE36476_CTRL_VS_TSST_ACT_40H_MEMORY_CD4_TCELL_OLD		0.007081128	-96.6616934	0.66418009	WITHDRAWN	adrenergic receptor antagonist			SIGNATURE_DOWN	Homo sapiens	EX_VIVO
suloctidil	657255	suloctidil inhibits young T CD4+ memory stimulated with TSST compared to young T CD4+ memory	T cell	CL:0000084	T CD4+ memory	CL:0000084	T cell	CL:0000897	T CD4+ memory	CL:0000897	GSE36476_CTRL_VS_TSST_ACT_40H_MEMORY_CD4_TCELL_YOUNG		0.007081128	-96.92279	0.66418009	WITHDRAWN	adrenergic receptor antagonist			SIGNATURE_DOWN	Homo sapiens	EX_VIVO
suloctidil	657255	suloctidil inhibits CD25+ T CD4+ effector compared to CD25- T cell	T cell	CL:0000084	T CD4+ effector	CL:0000084	T cell	CL:0001044	T cell	CL:0000084	GSE24634_TEFF_VS_TCONV_DAY7_IN_CULTURE	0.008663867	0.006924068	-96.93572496	0.66418009	WITHDRAWN	adrenergic receptor antagonist			SIGNATURE	Homo sapiens	EX_VIVO
suloctidil	657255	suloctidil inhibits T CD8+ na茂ve compared to PD-1 (high) T CD8+	T cell	CL:0000084	T CD8+ na茂ve	CL:0000084	T cell	CL:0000898	T CD8+	CL:0002437	GSE26495_NAIVE_VS_PD1HIGH_CD8_TCELL	0.891771872	0.021450558	-96.93572496	0.66418009	WITHDRAWN	adrenergic receptor antagonist			SIGNATURE	Homo sapiens	IN_VIVO
suloctidil	657255	suloctidil inhibits T regulatory compared to T cell stimulated with FOXP3 overexpression	T cell	CL:0000084	T regulatory	CL:0000084	T cell	CL:0000815	T cell	CL:0000084	GSE7460_CTRL_VS_FOXP3_OVEREXPR_TCONV	0.144583284	0.290863242	-97.30941704	0.66418009	WITHDRAWN	adrenergic receptor antagonist			SIGNATURE	Homo sapiens	EX_VIVO
suloctidil	657255	suloctidil inhibits T cell stimulated with TNF compared to T regulatory stimulated with TNF	T cell	CL:0000084	T cell	CL:0000084	T cell	CL:0000084	T regulatory	CL:0000815	GSE18893_TCONV_VS_TREG_24H_TNF_STIM	0.009801305		-97.4076837	0.66418009	WITHDRAWN	adrenergic receptor antagonist			SIGNATURE_UP	Homo sapiens	IN_VITRO
suloctidil	657255	suloctidil inhibits CD25- T CD4+ na茂ve stimulated with IL4 compared to CD25- T CD4+ na茂ve	T cell	CL:0000084	T CD4+ na茂ve	CL:0000084	T cell	CL:0000895	T CD4+ na茂ve	CL:0000895	GSE24634_IL4_VS_CTRL_TREATED_NAIVE_CD4_TCELL_DAY7	0.009079712	0.007341181	-97.45889387	0.66418009	WITHDRAWN	adrenergic receptor antagonist			SIGNATURE	Homo sapiens	EX_VIVO
suloctidil	657255	suloctidil inhibits T helper 1 stimulated with IL12 compared to T helper 1 stimulated with IFNa	T cell	CL:0000084	T helper 1	CL:0000084	T cell	CL:0000545	T helper 1	CL:0000545	GSE20198_IL12_VS_IFNA_TREATED_ACT_CD4_TCELL	0.373272068	0.062651449	-97.45889387	0.66418009	WITHDRAWN	adrenergic receptor antagonist			SIGNATURE	Homo sapiens	IN_VITRO
suloctidil	657255	suloctidil inhibits CD25+ T CD4+ effector compared to CD25- T cell	T cell	CL:0000084	T CD4+ effector	CL:0000084	T cell	CL:0001044	T cell	CL:0000084	GSE24634_TEFF_VS_TCONV_DAY7_IN_CULTURE	0.009079712	0.007341181	-97.68310912	0.66418009	WITHDRAWN	adrenergic receptor antagonist			SIGNATURE	Homo sapiens	EX_VIVO
suloctidil	657255	suloctidil inhibits CD25+ T regulatory stimulated with IL4 compared to CD25- T cell stimulated with IL4	T cell	CL:0000084	T regulatory	CL:0000084	T cell	CL:0000815	T cell	CL:0000084	GSE24634_TREG_VS_TCONV_POST_DAY7_IL4_CONVERSION	0.007081128		-97.78067885	0.66418009	WITHDRAWN	adrenergic receptor antagonist			SIGNATURE_UP	Homo sapiens	EX_VIVO
suloctidil	657255	suloctidil inhibits T helper stimulated with IL4, anti-CD3 and anti-CD28 compared to T helper stimulated with anti-CD3 and anti-CD28	T cell	CL:0000084	T helper	CL:0000084	T cell	CL:0000492	T helper	CL:0000492	GSE2770_IL4_ACT_VS_ACT_CD4_TCELL_2H	0.0309931	0.007341181	-97.79521674	0.66418009	WITHDRAWN	adrenergic receptor antagonist			SIGNATURE	Homo sapiens	EX_VIVO
suloctidil	657255	suloctidil inhibits CD25+ T CD4+ effector compared to CD25- T cell	T cell	CL:0000084	T CD4+ effector	CL:0000084	T cell	CL:0001044	T cell	CL:0000084	GSE24634_TEFF_VS_TCONV_DAY7_IN_CULTURE	0.007081128		-97.92987691	0.66418009	WITHDRAWN	adrenergic receptor antagonist			SIGNATURE_UP	Homo sapiens	EX_VIVO
suloctidil	657255	suloctidil inhibits T CD4+ in Lupus erythematosus compared to Myeloid in Lupus erythematosus	T cell	CL:0000084	T CD4+		Other	CL:0000624	Myeloid	CL:0000763	GSE10325_LUPUS_CD4_TCELL_VS_LUPUS_MYELOID	0.224508796	0.006924068	-98.43049327	0.66418009	WITHDRAWN	adrenergic receptor antagonist			SIGNATURE	Homo sapiens	PATIENT
suloctidil	657255	suloctidil inhibits T regulatory stimulated with TGFB compared to T cell stimulated with TGFB	T cell	CL:0000084	T regulatory	CL:0000084	T cell	CL:0000815	T cell	CL:0000084	GSE7460_TREG_VS_TCONV_ACT_WITH_TGFB	0.295480716	0.021450558	-98.65470852	0.66418009	WITHDRAWN	adrenergic receptor antagonist			SIGNATURE	Homo sapiens	EX_VIVO
suloctidil	657255	suloctidil inhibits T cell stimulated with TNF compared to T regulatory stimulated with TNF	T cell	CL:0000084	T cell	CL:0000084	T cell	CL:0000084	T regulatory	CL:0000815	GSE18893_TCONV_VS_TREG_24H_TNF_STIM	0.007081128		-98.769116	0.66418009	WITHDRAWN	adrenergic receptor antagonist			SIGNATURE_UP	Homo sapiens	IN_VITRO
suloctidil	657255	suloctidil inhibits T CD4+ memory compared to NK cell	T cell	CL:0000084	T CD4+ memory	CL:0000623	NK cell	CL:0000897	NK cell	CL:0000623	GSE3982_EFF_MEMORY_CD4_TCELL_VS_NKCELL	0.126051887	0.021450558	-98.84155456	0.66418009	WITHDRAWN	adrenergic receptor antagonist			SIGNATURE	Homo sapiens	UNKNOWN
suloctidil	657255	suloctidil inhibits PD-1 (high) T CD8+ compared to PD-1 (low) T CD8+	T cell	CL:0000084	T CD8+	CL:0000084	T cell	CL:0002437	T CD8+	CL:0002437	GSE26495_PD1HIGH_VS_PD1LOW_CD8_TCELL	0.505340893	0.021450558	-99.47683109	0.66418009	WITHDRAWN	adrenergic receptor antagonist			SIGNATURE	Homo sapiens	IN_VIVO
prenylamine	9801	prenylamine inhibits Dendritic cell stimulated with T.gondii compared to Dendritic cell stimulated with B.malayi	Dendritic cell	CL:0000451	Dendritic cell	CL:0000451	Dendritic cell	CL:0000451	Dendritic cell	CL:0000451	GSE360_T_GONDII_VS_B_MALAYI_LOW_DOSE_DC	0.735044292	0.054802376	-95.44095665		WITHDRAWN	calcium channel blocker	CALM1, MYLK2	801, 85366	SIGNATURE	Homo sapiens	IN_VITRO
prenylamine	9801	prenylamine inhibits Dendritic cell stimulated with SIV compared to Dendritic cell stimulated with SIV and HIV	Dendritic cell	CL:0000451	Dendritic cell	CL:0000451	Dendritic cell	CL:0000451	Dendritic cell	CL:0000451	GSE22589_SIV_VS_HIV_AND_SIV_INFECTED_DC	0.715630053	0.570498953	-96.11360239		WITHDRAWN	calcium channel blocker	CALM1, MYLK2	801, 85366	SIGNATURE	Homo sapiens	IN_VITRO
prenylamine	9801	prenylamine inhibits Dendritic cell stimulated with T.gondii compared to Dendritic cell stimulated with B.malayi	Dendritic cell	CL:0000451	Dendritic cell	CL:0000451	Dendritic cell	CL:0000451	Dendritic cell	CL:0000451	GSE360_T_GONDII_VS_B_MALAYI_HIGH_DOSE_DC	0.806618075	0.054802376	-97.42152466		WITHDRAWN	calcium channel blocker	CALM1, MYLK2	801, 85366	SIGNATURE	Homo sapiens	IN_VITRO
prenylamine	9801	prenylamine inhibits Dendritic cell compared to Dendritic cell	Dendritic cell	CL:0000451	Dendritic cell	CL:0000451	Dendritic cell	CL:0000451	Dendritic cell	CL:0000451	GSE14000_TRANSLATED_RNA_VS_MRNA_DC	0.041523402		-98.0231257		WITHDRAWN	calcium channel blocker	CALM1, MYLK2	801, 85366	SIGNATURE_UP	Homo sapiens	EX_VIVO
prenylamine	9801	prenylamine inhibits Dendritic cell stimulated with L.major compared to Dendritic cell stimulated with B.malayi	Dendritic cell	CL:0000451	Dendritic cell	CL:0000451	Dendritic cell	CL:0000451	Dendritic cell	CL:0000451	GSE360_L_MAJOR_VS_B_MALAYI_HIGH_DOSE_DC	0.081692463	0.393421341	-99.73841555		WITHDRAWN	calcium channel blocker	CALM1, MYLK2	801, 85366	SIGNATURE	Homo sapiens	IN_VITRO
prenylamine	9801	prenylamine inhibits Dendritic cell compared to Dendritic cell stimulated with Newcastle virus	Dendritic cell	CL:0000451	Dendritic cell	CL:0000451	Dendritic cell	CL:0000451	Dendritic cell	CL:0000451	GSE18791_CTRL_VS_NEWCASTLE_VIRUS_DC_6H	0.041523402		-99.83215218		WITHDRAWN	calcium channel blocker	CALM1, MYLK2	801, 85366	SIGNATURE_UP	Homo sapiens	IN_VITRO
prenylamine	9801	prenylamine inhibits Macrophage compared to Macrophage stimulated with B.malayi	Macrophage	CL:0000235	Macrophage	CL:0000235	Macrophage	CL:0000235	Macrophage	CL:0000235	GSE360_CTRL_VS_B_MALAYI_LOW_DOSE_MAC	0.688907691	0.33952045	-95.36621824		WITHDRAWN	calcium channel blocker	CALM1, MYLK2	801, 85366	SIGNATURE	Homo sapiens	IN_VITRO
prenylamine	9801	prenylamine inhibits Macrophage stimulated with IL4, Dexamethasone and TGFB compared to Macrophage stimulated with IL4 and TGFB	Macrophage	CL:0000235	Macrophage	CL:0000235	Macrophage	CL:0000235	Macrophage	CL:0000235	GSE7568_IL4_TGFB_DEXAMETHASONE_VS_IL4_TGFB_TREATED_MACROPHAGE	0.041523402		-96.32599776		WITHDRAWN	calcium channel blocker	CALM1, MYLK2	801, 85366	SIGNATURE_UP	Homo sapiens	IN_VITRO
prenylamine	9801	prenylamine inhibits Monocyte stimulated with anti-TREM1 compared to Monocyte stimulated with LPS	Monocyte	CL:0000576	Monocyte	CL:0000576	Monocyte	CL:0000576	Monocyte	CL:0000576	GSE9988_ANTI_TREM1_VS_LPS_MONOCYTE	0.580918268	0.574119241	-95.96412556		WITHDRAWN	calcium channel blocker	CALM1, MYLK2	801, 85366	SIGNATURE	Homo sapiens	EX_VIVO
prenylamine	9801	prenylamine inhibits Monocyte stimulated with M. tuberculosis compared to Monocyte stimulated with Muramyl Dipeptide and M. tuberculosis	Monocyte	CL:0000576	Monocyte	CL:0000576	Monocyte	CL:0000576	Monocyte	CL:0000576	GSE34156_NOD2_LIGAND_VS_TLR1_TLR2_LIGAND_24H_TREATED_MONOCYTE		0.041523402	-96.49384558		WITHDRAWN	calcium channel blocker	CALM1, MYLK2	801, 85366	SIGNATURE_DOWN	Homo sapiens	IN_VITRO
prenylamine	9801	prenylamine inhibits Neutrophil stimulated with A.phagocytophilum compared to Neutrophil	Neutrophil	CL:0000775	Neutrophil	CL:0000775	Neutrophil	CL:0000775	Neutrophil	CL:0000775	GSE2405_0H_VS_9H_A_PHAGOCYTOPHILUM_STIM_NEUTROPHIL		0.041523402	-96.34464752		WITHDRAWN	calcium channel blocker	CALM1, MYLK2	801, 85366	SIGNATURE_DOWN	Homo sapiens	EX_VIVO
prenylamine	9801	prenylamine inhibits Neutrophil stimulated with F.tularensis compared to Neutrophil	Neutrophil	CL:0000775	Neutrophil	CL:0000775	Neutrophil	CL:0000775	Neutrophil	CL:0000775	GSE37416_CTRL_VS_24H_F_TULARENSIS_LVS_NEUTROPHIL		0.041523402	-96.40059679		WITHDRAWN	calcium channel blocker	CALM1, MYLK2	801, 85366	SIGNATURE_DOWN	Homo sapiens	IN_VITRO
prenylamine	9801	prenylamine inhibits Neutrophil stimulated with F.tularensis compared to Neutrophil	Neutrophil	CL:0000775	Neutrophil	CL:0000775	Neutrophil	CL:0000775	Neutrophil	CL:0000775	GSE37416_CTRL_VS_3H_F_TULARENSIS_LVS_NEUTROPHIL		0.041523402	-99.75755315		WITHDRAWN	calcium channel blocker	CALM1, MYLK2	801, 85366	SIGNATURE_DOWN	Homo sapiens	IN_VITRO
prenylamine	9801	prenylamine inhibits PBMC compared to PBMC in Diabetes type 1	PBMC	CL:2000001	PBMC	CL:2000001	PBMC	CL:2000001	PBMC	CL:2000001	GSE9006_HEALTHY_VS_TYPE_1_DIABETES_PBMC_1MONTH_POST_DX	0.041523402		-95.85975382		WITHDRAWN	calcium channel blocker	CALM1, MYLK2	801, 85366	SIGNATURE_UP	Homo sapiens	IN_VIVO
prenylamine	9801	prenylamine inhibits PBMC compared to PBMC stimulated with LAIV Influenza vaccine	PBMC	CL:2000001	PBMC	CL:2000001	PBMC	CL:2000001	PBMC	CL:2000001	GSE29615_CTRL_VS_LAIV_FLU_VACCINE_PBMC	0.424429019	0.274306458	-96.44992526		WITHDRAWN	calcium channel blocker	CALM1, MYLK2	801, 85366	SIGNATURE	Homo sapiens	UNKNOWN
prenylamine	9801	prenylamine inhibits PBMC in Diabetes type 1 compared to PBMC in Diabetes type 1	PBMC	CL:2000001	PBMC	CL:2000001	PBMC	CL:2000001	PBMC	CL:2000001	GSE9006_TYPE_1_DIABETES_AT_DX_VS_4MONTH_POST_DX_PBMC	0.041523402		-96.54979485		WITHDRAWN	calcium channel blocker	CALM1, MYLK2	801, 85366	SIGNATURE_UP	Homo sapiens	IN_VIVO
prenylamine	9801	prenylamine inhibits PBMC stimulated with gram negative bacteria compared to PBMC stimulated with gram positive bacteria	PBMC	CL:2000001	PBMC	CL:2000001	PBMC	CL:2000001	PBMC	CL:2000001	GSE9960_GRAM_NEG_VS_GRAM_POS_SEPSIS_PBMC	0.080389329	0.840047716	-96.59940209		WITHDRAWN	calcium channel blocker	CALM1, MYLK2	801, 85366	SIGNATURE	Homo sapiens	PATIENT
prenylamine	9801	prenylamine inhibits PBMC compared to PBMC in Diabetes type 1	PBMC	CL:2000001	PBMC	CL:2000001	PBMC	CL:2000001	PBMC	CL:2000001	GSE9006_HEALTHY_VS_TYPE_1_DIABETES_PBMC_4MONTH_POST_DX	0.041523402		-97.85527788		WITHDRAWN	calcium channel blocker	CALM1, MYLK2	801, 85366	SIGNATURE_UP	Homo sapiens	IN_VIVO
prenylamine	9801	prenylamine inhibits PBMC compared to PBMC stimulated with LAIV Influenza vaccine	PBMC	CL:2000001	PBMC	CL:2000001	PBMC	CL:2000001	PBMC	CL:2000001	GSE29615_CTRL_VS_DAY3_LAIV_IFLU_VACCINE_PBMC	0.041523402		-97.96717643		WITHDRAWN	calcium channel blocker	CALM1, MYLK2	801, 85366	SIGNATURE_UP	Homo sapiens	UNKNOWN
prenylamine	9801	prenylamine inhibits PBMC compared to PBMC stimulated with LAIV Influenza vaccine	PBMC	CL:2000001	PBMC	CL:2000001	PBMC	CL:2000001	PBMC	CL:2000001	GSE29615_CTRL_VS_DAY3_LAIV_IFLU_VACCINE_PBMC	0.055587869	0.358634377	-99.14050822		WITHDRAWN	calcium channel blocker	CALM1, MYLK2	801, 85366	SIGNATURE	Homo sapiens	UNKNOWN
prenylamine	9801	prenylamine inhibits T helper stimulated with IL4, anti-CD3 and anti-CD28 compared to T CD4+ naïve	T cell	CL:0000084	T CD4+ naïve	CL:0000084	T cell	CL:0000895	T helper	CL:0000492	GSE2770_UNTREATED_VS_IL4_TREATED_ACT_CD4_TCELL_2H		0.041523402	-95.09511376		WITHDRAWN	calcium channel blocker	CALM1, MYLK2	801, 85366	SIGNATURE_DOWN	Homo sapiens	EX_VIVO
prenylamine	9801	prenylamine inhibits T CD4+ stimulated with allergen in Allergy compared to T CD4+	T cell	CL:0000084	T CD4+	CL:0000084	T cell	CL:0000624	T CD4+	CL:0000624	GSE14908_RESTING_VS_HDM_STIM_CD4_TCELL_ATOPIC_PATIENT		0.065556534	-95.22566207		WITHDRAWN	calcium channel blocker	CALM1, MYLK2	801, 85366	SIGNATURE_DOWN	Homo sapiens	PATIENT
prenylamine	9801	prenylamine inhibits T CD4+ stimulated with IL4 and anti-IL12 compared to T CD4+	T cell	CL:0000084	T CD4+	CL:0000084	T cell	CL:0000624	T CD4+	CL:0000624	GSE17974_CTRL_VS_ACT_IL4_AND_ANTI_IL12_24H_CD4_TCELL		0.041523402	-95.9157031		WITHDRAWN	calcium channel blocker	CALM1, MYLK2	801, 85366	SIGNATURE_DOWN	Homo sapiens	EX_VIVO
prenylamine	9801	prenylamine inhibits T helper 1 compared to T CD4+ naïve	T cell	CL:0000084	T CD4+ naïve	CL:0000084	T cell	CL:0000895	T helper 1	CL:0000545	GSE22886_NAIVE_CD4_TCELL_VS_48H_ACT_TH1		0.041523402	-96.06490116		WITHDRAWN	calcium channel blocker	CALM1, MYLK2	801, 85366	SIGNATURE_DOWN	Homo sapiens	IN_SILICO
prenylamine	9801	prenylamine inhibits resting T CD8+ memory compared to resting T CD8+ naïve	T cell	CL:0000084	T CD8+ memory	CL:0000084	T cell	CL:0000909	T CD8+ naïve	CL:0000898	GSE16522_MEMORY_VS_NAIVE_CD8_TCELL	0.182995213	0.394297524	-96.07623318		WITHDRAWN	calcium channel blocker	CALM1, MYLK2	801, 85366	SIGNATURE	Homo sapiens	UNKNOWN
prenylamine	9801	prenylamine inhibits T CD8+ naïve compared to Monocyte	T cell	CL:0000084	T CD8+ naïve	CL:0000576	Monocyte	CL:0000898	Monocyte	CL:0000576	GSE22886_NAIVE_CD8_TCELL_VS_MONOCYTE	0.066960264	0.054802376	-96.18834081		WITHDRAWN	calcium channel blocker	CALM1, MYLK2	801, 85366	SIGNATURE	Homo sapiens	IN_SILICO
prenylamine	9801	prenylamine inhibits T cell compared to T cell	T cell	CL:0000084	T cell	CL:0000084	T cell	CL:0000084	T cell	CL:0000084	GSE22886_UNSTIM_VS_STIM_MEMORY_TCELL		0.041523402	-96.36329728		WITHDRAWN	calcium channel blocker	CALM1, MYLK2	801, 85366	SIGNATURE_DOWN	Homo sapiens	IN_SILICO
prenylamine	9801	prenylamine inhibits T CD4+ compared to Va24- NK naïve	T cell	CL:0000084	T CD4+	CL:0000623	NK cell	CL:0000624	NK naïve	CL:0000914	GSE28726_ACT_CD4_TCELL_VS_ACT_VA24NEG_NKTCELL	0.041523402		-96.41924655		WITHDRAWN	calcium channel blocker	CALM1, MYLK2	801, 85366	SIGNATURE_UP	Homo sapiens	IN_VITRO
prenylamine	9801	prenylamine inhibits T CD4+ memory compared to B cell	T cell	CL:0000084	T CD4+ memory	CL:0000236	B cell	CL:0000897	B cell	CL:0000236	GSE3982_MEMORY_CD4_TCELL_VS_BCELL	0.931016646	0.054802376	-96.6367713		WITHDRAWN	calcium channel blocker	CALM1, MYLK2	801, 85366	SIGNATURE	Homo sapiens	UNKNOWN
prenylamine	9801	prenylamine inhibits T helper compared to T helper stimulated with IL12, TGFB, anti-CD3 and anti-CD28	T cell	CL:0000084	T helper	CL:0000084	T cell	CL:0000492	T helper	CL:0000492	GSE2770_IL12_AND_TGFB_ACT_VS_ACT_CD4_TCELL_6H		0.041523402	-96.73629243		WITHDRAWN	calcium channel blocker	CALM1, MYLK2	801, 85366	SIGNATURE_DOWN	Homo sapiens	EX_VIVO
prenylamine	9801	prenylamine inhibits CD25+ T regulatory stimulated with IL4 compared to CD25- T cell stimulated with IL4	T cell	CL:0000084	T regulatory	CL:0000084	T cell	CL:0000815	T cell	CL:0000084	GSE24634_TREG_VS_TCONV_POST_DAY5_IL4_CONVERSION	0.041523402		-96.7922417		WITHDRAWN	calcium channel blocker	CALM1, MYLK2	801, 85366	SIGNATURE_UP	Homo sapiens	EX_VIVO
prenylamine	9801	prenylamine inhibits effector T CD4+ memory compared to central memory T CD4+ memory	T cell	CL:0000084	T CD4+ memory	CL:0000084	T cell	CL:0000897	T CD4+ memory	CL:0000897	GSE11057_EFF_MEM_VS_CENT_MEM_CD4_TCELL	0.872496637	0.054802376	-96.82361734		WITHDRAWN	calcium channel blocker	CALM1, MYLK2	801, 85366	SIGNATURE	Homo sapiens	IN_VIVO
prenylamine	9801	prenylamine inhibits T CD4+ stimulated with cultured (6 hours) compared to T CD4+ stimulated with cultured (0 hours)	T cell	CL:0000084	T CD4+	CL:0000084	T cell	CL:0000624	T CD4+	CL:0000624	GSE17974_0H_VS_6H_IN_VITRO_ACT_CD4_TCELL		0.041523402	-96.94143976		WITHDRAWN	calcium channel blocker	CALM1, MYLK2	801, 85366	SIGNATURE_DOWN	Homo sapiens	EX_VIVO
prenylamine	9801	prenylamine inhibits T helper 1 stimulated with IL12 compared to T helper 1 stimulated with IL12 and IL18	T cell	CL:0000084	T helper 1	CL:0000084	T cell	CL:0000545	T helper 1	CL:0000545	GSE20198_IL12_VS_IL12_IL18_TREATED_ACT_CD4_TCELL	0.148357588	0.954805562	-97.08520179		WITHDRAWN	calcium channel blocker	CALM1, MYLK2	801, 85366	SIGNATURE	Homo sapiens	IN_VITRO
prenylamine	9801	prenylamine inhibits T CD8+ naïve compared to Monocyte	T cell	CL:0000084	T CD8+ naïve	CL:0000576	Monocyte	CL:0000898	Monocyte	CL:0000576	GSE22886_NAIVE_CD8_TCELL_VS_MONOCYTE	0.041523402		-97.25848564		WITHDRAWN	calcium channel blocker	CALM1, MYLK2	801, 85366	SIGNATURE_UP	Homo sapiens	IN_SILICO
prenylamine	9801	prenylamine inhibits T CD8+ naïve compared to T CD8+ memory	T cell	CL:0000084	T CD8+ memory	CL:0000084	T cell	CL:0000909	T CD8+ naïve	CL:0000898	GSE23321_EFFECTOR_MEMORY_VS_NAIVE_CD8_TCELL		0.041523402	-98.17232376		WITHDRAWN	calcium channel blocker	CALM1, MYLK2	801, 85366	SIGNATURE_DOWN	Homo sapiens	IN_VIVO
prenylamine	9801	prenylamine inhibits T CD8+ compared to T CD8+ stimulated with Overexpression (KLBR1)	T cell	CL:0000084	T CD8+	CL:0000084	T cell	CL:0002437	T CD8+	CL:0002437	GSE33425_CD161_INT_VS_NEG_CD8_TCELL	0.327748383	0.054802376	-98.65470852		WITHDRAWN	calcium channel blocker	CALM1, MYLK2	801, 85366	SIGNATURE	Homo sapiens	IN_VIVO
prenylamine	9801	prenylamine inhibits T CD4+ compared to B cell	T cell	CL:0000084	T CD4+	CL:0000236	B cell	CL:0000624	B cell	CL:0000236	GSE10325_CD4_TCELL_VS_BCELL	0.23450407	0.054802376	-99.17787743		WITHDRAWN	calcium channel blocker	CALM1, MYLK2	801, 85366	SIGNATURE	Homo sapiens	IN_VIVO
prenylamine	9801	prenylamine inhibits immature CD4+ SP T CD4+ compared to CD4+ SP Thymocyte	T cell	CL:0000084	T CD4+	CL:0000837	Hematopoietic stem and progenitor cells	CL:0000624	Thymocyte	CL:0000893	GSE22601_IMMATURE_CD4_SINGLE_POSITIVE_VS_CD4_SINGLE_POSITIVE_THYMOCYTE	0.175701649	0.910123074	-99.21524664		WITHDRAWN	calcium channel blocker	CALM1, MYLK2	801, 85366	SIGNATURE	Homo sapiens	PATIENT
terfenadine	5405	terfenadine inhibits B cell naïve compared to Neutrophil	B cell	CL:0000236	B cell naïve	CL:0000775	Neutrophil	CL:0000788	Neutrophil	CL:0000775	GSE22886_NAIVE_BCELL_VS_NEUTROPHIL	0.01338107	0.008415941	-95.02989537	0.692620294	WITHDRAWN	histamine receptor antagonist	KCNH1, KCNH2, CHRM2, CHRM1, HRH1, CHRM5, CHRM4, CHRM3	3756, 3757, 1129, 1128, 3269, 1133, 1132, 1131	SIGNATURE	Homo sapiens	IN_SILICO
terfenadine	5405	terfenadine inhibits B cell naïve compared to Monocyte	B cell	CL:0000236	B cell naïve	CL:0000576	Monocyte	CL:0000788	Monocyte	CL:0000576	GSE22886_NAIVE_BCELL_VS_MONOCYTE	0.207368987	0.008415941	-95.10463378	0.692620294	WITHDRAWN	histamine receptor antagonist	KCNH1, KCNH2, CHRM2, CHRM1, HRH1, CHRM5, CHRM4, CHRM3	3756, 3757, 1129, 1128, 3269, 1133, 1132, 1131	SIGNATURE	Homo sapiens	IN_SILICO
terfenadine	5405	terfenadine inhibits B cell compared to Plasma cell	B cell	CL:0000236	B cell	CL:0000236	B cell	CL:0000236	Plasma cell	CL:0000786	GSE12366_GC_BCELL_VS_PLASMA_CELL	0.01338107	0.008415941	-95.32884903	0.692620294	WITHDRAWN	histamine receptor antagonist	KCNH1, KCNH2, CHRM2, CHRM1, HRH1, CHRM5, CHRM4, CHRM3	3756, 3757, 1129, 1128, 3269, 1133, 1132, 1131	SIGNATURE	Homo sapiens	PATIENT
terfenadine	5405	terfenadine inhibits B cell naïve compared to Plasma cell	B cell	CL:0000236	B cell naïve	CL:0000236	B cell	CL:0000788	Plasma cell	CL:0000786	GSE22886_NAIVE_BCELL_VS_BM_PLASMA_CELL	0.022086497	0.008415941	-95.73991031	0.692620294	WITHDRAWN	histamine receptor antagonist	KCNH1, KCNH2, CHRM2, CHRM1, HRH1, CHRM5, CHRM4, CHRM3	3756, 3757, 1129, 1128, 3269, 1133, 1132, 1131	SIGNATURE	Homo sapiens	IN_SILICO
terfenadine	5405	terfenadine inhibits B cell compared to B cell naïve	B cell	CL:0000236	B cell	CL:0000236	B cell	CL:0000236	B cell naïve	CL:0000788	GSE12366_GC_VS_NAIVE_BCELL	0.008723863		-96.08355091	0.692620294	WITHDRAWN	histamine receptor antagonist	KCNH1, KCNH2, CHRM2, CHRM1, HRH1, CHRM5, CHRM4, CHRM3	3756, 3757, 1129, 1128, 3269, 1133, 1132, 1131	SIGNATURE_UP	Homo sapiens	PATIENT
terfenadine	5405	terfenadine inhibits B cell compared to Myeloid	B cell	CL:0000236	B cell		Other	CL:0000236	Myeloid	CL:0000763	GSE10325_BCELL_VS_MYELOID	0.789176758	0.008415941	-96.93572496	0.692620294	WITHDRAWN	histamine receptor antagonist	KCNH1, KCNH2, CHRM2, CHRM1, HRH1, CHRM5, CHRM4, CHRM3	3756, 3757, 1129, 1128, 3269, 1133, 1132, 1131	SIGNATURE	Homo sapiens	IN_VIVO
terfenadine	5405	terfenadine inhibits B cell compared to B cell memory	B cell	CL:0000236	B cell	CL:0000236	B cell	CL:0000236	B cell memory	CL:0000787	GSE12366_GC_VS_MEMORY_BCELL	0.008723863		-98.06042521	0.692620294	WITHDRAWN	histamine receptor antagonist	KCNH1, KCNH2, CHRM2, CHRM1, HRH1, CHRM5, CHRM4, CHRM3	3756, 3757, 1129, 1128, 3269, 1133, 1132, 1131	SIGNATURE_UP	Homo sapiens	PATIENT
terfenadine	5405	terfenadine inhibits Dendritic cell compared to Dendritic cell stimulated with Newcastle virus	Dendritic cell	CL:0000451	Dendritic cell	CL:0000451	Dendritic cell	CL:0000451	Dendritic cell	CL:0000451	GSE18791_CTRL_VS_NEWCASTLE_VIRUS_DC_14H	0.008723863		-95.00186498	0.692620294	WITHDRAWN	histamine receptor antagonist	KCNH1, KCNH2, CHRM2, CHRM1, HRH1, CHRM5, CHRM4, CHRM3	3756, 3757, 1129, 1128, 3269, 1133, 1132, 1131	SIGNATURE_UP	Homo sapiens	IN_VITRO
terfenadine	5405	terfenadine inhibits Dendritic cell compared to Dendritic cell stimulated with LPS	Dendritic cell	CL:0000451	Dendritic cell	CL:0000451	Dendritic cell	CL:0000451	Dendritic cell	CL:0000451	GSE14000_UNSTIM_VS_4H_LPS_DC_TRANSLATED_RNA	0.008723863		-95.33756061	0.692620294	WITHDRAWN	histamine receptor antagonist	KCNH1, KCNH2, CHRM2, CHRM1, HRH1, CHRM5, CHRM4, CHRM3	3756, 3757, 1129, 1128, 3269, 1133, 1132, 1131	SIGNATURE_UP	Homo sapiens	EX_VIVO
terfenadine	5405	terfenadine inhibits Dendritic cell compared to Dendritic cell stimulated with Newcastle virus	Dendritic cell	CL:0000451	Dendritic cell	CL:0000451	Dendritic cell	CL:0000451	Dendritic cell	CL:0000451	GSE18791_CTRL_VS_NEWCASTLE_VIRUS_DC_12H	0.008723863		-95.76650504	0.692620294	WITHDRAWN	histamine receptor antagonist	KCNH1, KCNH2, CHRM2, CHRM1, HRH1, CHRM5, CHRM4, CHRM3	3756, 3757, 1129, 1128, 3269, 1133, 1132, 1131	SIGNATURE_UP	Homo sapiens	IN_VITRO
terfenadine	5405	terfenadine inhibits Dendritic cell stimulated with LPS-like compared to Dendritic cell stimulated with LPS and LPS-like	Dendritic cell	CL:0000451	Dendritic cell	CL:0000451	Dendritic cell	CL:0000451	Dendritic cell	CL:0000451	GSE4748_CYANOBACTERIUM_LPSLIKE_VS_LPS_AND_CYANOBACTERIUM_LPSLIKE_STIM_DC_3H	0.037663617	0.008415941	-95.77727952	0.692620294	WITHDRAWN	histamine receptor antagonist	KCNH1, KCNH2, CHRM2, CHRM1, HRH1, CHRM5, CHRM4, CHRM3	3756, 3757, 1129, 1128, 3269, 1133, 1132, 1131	SIGNATURE	Homo sapiens	IN_VITRO
terfenadine	5405	terfenadine inhibits Dendritic cell compared to Dendritic cell stimulated with Newcastle virus	Dendritic cell	CL:0000451	Dendritic cell	CL:0000451	Dendritic cell	CL:0000451	Dendritic cell	CL:0000451	GSE18791_CTRL_VS_NEWCASTLE_VIRUS_DC_10H	0.008723863		-95.80380455	0.692620294	WITHDRAWN	histamine receptor antagonist	KCNH1, KCNH2, CHRM2, CHRM1, HRH1, CHRM5, CHRM4, CHRM3	3756, 3757, 1129, 1128, 3269, 1133, 1132, 1131	SIGNATURE_UP	Homo sapiens	IN_VITRO
terfenadine	5405	terfenadine inhibits Dendritic cell compared to Dendritic cell stimulated with Newcastle virus	Dendritic cell	CL:0000451	Dendritic cell	CL:0000451	Dendritic cell	CL:0000451	Dendritic cell	CL:0000451	GSE18791_CTRL_VS_NEWCASTLE_VIRUS_DC_4H	0.008723863		-96.13950019	0.692620294	WITHDRAWN	histamine receptor antagonist	KCNH1, KCNH2, CHRM2, CHRM1, HRH1, CHRM5, CHRM4, CHRM3	3756, 3757, 1129, 1128, 3269, 1133, 1132, 1131	SIGNATURE_UP	Homo sapiens	IN_VITRO
terfenadine	5405	terfenadine inhibits T helper 2 compared to Dendritic cell	Dendritic cell	CL:0000451	Dendritic cell	CL:0000084	T cell	CL:0000451	T helper 2	CL:0000546	GSE3982_DC_VS_TH2		0.008723863	-96.28869825	0.692620294	WITHDRAWN	histamine receptor antagonist	KCNH1, KCNH2, CHRM2, CHRM1, HRH1, CHRM5, CHRM4, CHRM3	3756, 3757, 1129, 1128, 3269, 1133, 1132, 1131	SIGNATURE_DOWN	Homo sapiens	UNKNOWN
terfenadine	5405	terfenadine inhibits Dendritic cell compared to Dendritic cell stimulated with Newcastle virus	Dendritic cell	CL:0000451	Dendritic cell	CL:0000451	Dendritic cell	CL:0000451	Dendritic cell	CL:0000451	GSE18791_CTRL_VS_NEWCASTLE_VIRUS_DC_4H	0.01338107	0.008415941	-96.37518685	0.692620294	WITHDRAWN	histamine receptor antagonist	KCNH1, KCNH2, CHRM2, CHRM1, HRH1, CHRM5, CHRM4, CHRM3	3756, 3757, 1129, 1128, 3269, 1133, 1132, 1131	SIGNATURE	Homo sapiens	IN_VITRO
terfenadine	5405	terfenadine inhibits Dendritic cell compared to Dendritic cell stimulated with Newcastle virus	Dendritic cell	CL:0000451	Dendritic cell	CL:0000451	Dendritic cell	CL:0000451	Dendritic cell	CL:0000451	GSE18791_CTRL_VS_NEWCASTLE_VIRUS_DC_6H	0.008723863		-96.82954122	0.692620294	WITHDRAWN	histamine receptor antagonist	KCNH1, KCNH2, CHRM2, CHRM1, HRH1, CHRM5, CHRM4, CHRM3	3756, 3757, 1129, 1128, 3269, 1133, 1132, 1131	SIGNATURE_UP	Homo sapiens	IN_VITRO
terfenadine	5405	terfenadine inhibits Dendritic cell compared to Dendritic cell stimulated with RARA agonist	Dendritic cell	CL:0000451	Dendritic cell	CL:0000451	Dendritic cell	CL:0000451	Dendritic cell	CL:0000451	GSE5679_CTRL_VS_RARA_AGONIST_AM580_TREATED_DC	0.008723863		-96.97873928	0.692620294	WITHDRAWN	histamine receptor antagonist	KCNH1, KCNH2, CHRM2, CHRM1, HRH1, CHRM5, CHRM4, CHRM3	3756, 3757, 1129, 1128, 3269, 1133, 1132, 1131	SIGNATURE_UP	Homo sapiens	EX_VIVO
terfenadine	5405	terfenadine inhibits Dendritic cell compared to Dendritic cell stimulated with Newcastle virus	Dendritic cell	CL:0000451	Dendritic cell	CL:0000451	Dendritic cell	CL:0000451	Dendritic cell	CL:0000451	GSE18791_CTRL_VS_NEWCASTLE_VIRUS_DC_18H	0.008723863		-97.03468855	0.692620294	WITHDRAWN	histamine receptor antagonist	KCNH1, KCNH2, CHRM2, CHRM1, HRH1, CHRM5, CHRM4, CHRM3	3756, 3757, 1129, 1128, 3269, 1133, 1132, 1131	SIGNATURE_UP	Homo sapiens	IN_VITRO
terfenadine	5405	terfenadine inhibits Dendritic cell compared to Dendritic cell stimulated with Newcastle virus	Dendritic cell	CL:0000451	Dendritic cell	CL:0000451	Dendritic cell	CL:0000451	Dendritic cell	CL:0000451	GSE18791_CTRL_VS_NEWCASTLE_VIRUS_DC_16H	0.008723863		-97.37038419	0.692620294	WITHDRAWN	histamine receptor antagonist	KCNH1, KCNH2, CHRM2, CHRM1, HRH1, CHRM5, CHRM4, CHRM3	3756, 3757, 1129, 1128, 3269, 1133, 1132, 1131	SIGNATURE_UP	Homo sapiens	IN_VITRO
terfenadine	5405	terfenadine inhibits Dendritic cell stimulated with B.malayi compared to Macrophage stimulated with B.malayi	Dendritic cell	CL:0000451	Dendritic cell	CL:0000235	Macrophage	CL:0000451	Macrophage	CL:0000235	GSE360_DC_VS_MAC_B_MALAYI_LOW_DOSE	0.12501507	0.114644952	-97.86995516	0.692620294	WITHDRAWN	histamine receptor antagonist	KCNH1, KCNH2, CHRM2, CHRM1, HRH1, CHRM5, CHRM4, CHRM3	3756, 3757, 1129, 1128, 3269, 1133, 1132, 1131	SIGNATURE	Homo sapiens	IN_VITRO
terfenadine	5405	terfenadine inhibits Dendritic cell compared to Dendritic cell stimulated with Rosiglitazone	Dendritic cell	CL:0000451	Dendritic cell	CL:0000451	Dendritic cell	CL:0000451	Dendritic cell	CL:0000451	GSE5679_CTRL_VS_PPARG_LIGAND_ROSIGLITAZONE_TREATED_DC	0.01338107	0.043880362	-98.50523169	0.692620294	WITHDRAWN	histamine receptor antagonist	KCNH1, KCNH2, CHRM2, CHRM1, HRH1, CHRM5, CHRM4, CHRM3	3756, 3757, 1129, 1128, 3269, 1133, 1132, 1131	SIGNATURE	Homo sapiens	EX_VIVO
terfenadine	5405	terfenadine inhibits Dendritic cell compared to Dendritic cell stimulated with Rosiglitazone	Dendritic cell	CL:0000451	Dendritic cell	CL:0000451	Dendritic cell	CL:0000451	Dendritic cell	CL:0000451	GSE5679_CTRL_VS_PPARG_LIGAND_ROSIGLITAZONE_TREATED_DC	0.008723863		-98.5080194	0.692620294	WITHDRAWN	histamine receptor antagonist	KCNH1, KCNH2, CHRM2, CHRM1, HRH1, CHRM5, CHRM4, CHRM3	3756, 3757, 1129, 1128, 3269, 1133, 1132, 1131	SIGNATURE_UP	Homo sapiens	EX_VIVO
terfenadine	5405	terfenadine inhibits Dendritic cell compared to Dendritic cell	Dendritic cell	CL:0000451	Dendritic cell	CL:0000451	Dendritic cell	CL:0000451	Dendritic cell	CL:0000451	GSE14000_TRANSLATED_RNA_VS_MRNA_DC	0.01338107	0.533578442	-98.5426009	0.692620294	WITHDRAWN	histamine receptor antagonist	KCNH1, KCNH2, CHRM2, CHRM1, HRH1, CHRM5, CHRM4, CHRM3	3756, 3757, 1129, 1128, 3269, 1133, 1132, 1131	SIGNATURE	Homo sapiens	EX_VIVO
terfenadine	5405	terfenadine inhibits Dendritic cell stimulated with T.gondii compared to Macrophage stimulated with T.gondii	Dendritic cell	CL:0000451	Dendritic cell	CL:0000235	Macrophage	CL:0000451	Macrophage	CL:0000235	GSE360_DC_VS_MAC_T_GONDII	0.980571052	0.008415941	-99.21524664	0.692620294	WITHDRAWN	histamine receptor antagonist	KCNH1, KCNH2, CHRM2, CHRM1, HRH1, CHRM5, CHRM4, CHRM3	3756, 3757, 1129, 1128, 3269, 1133, 1132, 1131	SIGNATURE	Homo sapiens	IN_VITRO
terfenadine	5405	terfenadine inhibits Dendritic cell compared to Dendritic cell stimulated with SIV and HIV	Dendritic cell	CL:0000451	Dendritic cell	CL:0000451	Dendritic cell	CL:0000451	Dendritic cell	CL:0000451	GSE22589_HEALTHY_VS_HIV_AND_SIV_INFECTED_DC	0.01338107	0.060327903	-99.88789238	0.692620294	WITHDRAWN	histamine receptor antagonist	KCNH1, KCNH2, CHRM2, CHRM1, HRH1, CHRM5, CHRM4, CHRM3	3756, 3757, 1129, 1128, 3269, 1133, 1132, 1131	SIGNATURE	Homo sapiens	IN_VITRO
terfenadine	5405	terfenadine inhibits T helper 2 compared to Macrophage	Macrophage	CL:0000235	Macrophage	CL:0000084	T cell	CL:0000235	T helper 2	CL:0000546	GSE3982_MAC_VS_TH2		0.008723863	-96.77359194	0.692620294	WITHDRAWN	histamine receptor antagonist	KCNH1, KCNH2, CHRM2, CHRM1, HRH1, CHRM5, CHRM4, CHRM3	3756, 3757, 1129, 1128, 3269, 1133, 1132, 1131	SIGNATURE_DOWN	Homo sapiens	UNKNOWN
terfenadine	5405	terfenadine inhibits Monocyte compared to Macrophage stimulated with IL4 and Rosiglitazone	Monocyte	CL:0000576	Monocyte	CL:0000235	Macrophage	CL:0000576	Macrophage	CL:0000235	GSE16385_MONOCYTE_VS_12H_ROSIGLITAZONE_IL4_TREATED_MACROPHAGE	0.022086497	0.19577835	-95.29147982	0.692620294	WITHDRAWN	histamine receptor antagonist	KCNH1, KCNH2, CHRM2, CHRM1, HRH1, CHRM5, CHRM4, CHRM3	3756, 3757, 1129, 1128, 3269, 1133, 1132, 1131	SIGNATURE	Homo sapiens	EX_VIVO
terfenadine	5405	terfenadine inhibits Monocyte stimulated with M. tuberculosis compared to Monocyte stimulated with Muramyl Dipeptide and M. tuberculosis	Monocyte	CL:0000576	Monocyte	CL:0000576	Monocyte	CL:0000576	Monocyte	CL:0000576	GSE34156_NOD2_LIGAND_VS_TLR1_TLR2_LIGAND_24H_TREATED_MONOCYTE		0.008723863	-97.09063782	0.692620294	WITHDRAWN	histamine receptor antagonist	KCNH1, KCNH2, CHRM2, CHRM1, HRH1, CHRM5, CHRM4, CHRM3	3756, 3757, 1129, 1128, 3269, 1133, 1132, 1131	SIGNATURE_DOWN	Homo sapiens	IN_VITRO
terfenadine	5405	terfenadine inhibits Monocyte compared to Monocyte stimulated with M. tuberculosis	Monocyte	CL:0000576	Monocyte	CL:0000576	Monocyte	CL:0000576	Monocyte	CL:0000576	GSE8921_UNSTIM_VS_TLR1_2_STIM_MONOCYTE_3H	0.008723863		-97.79932861	0.692620294	WITHDRAWN	histamine receptor antagonist	KCNH1, KCNH2, CHRM2, CHRM1, HRH1, CHRM5, CHRM4, CHRM3	3756, 3757, 1129, 1128, 3269, 1133, 1132, 1131	SIGNATURE_UP	Homo sapiens	IN_VITRO
terfenadine	5405	terfenadine inhibits Monocyte compared to Monocyte stimulated with M. tuberculosis	Monocyte	CL:0000576	Monocyte	CL:0000576	Monocyte	CL:0000576	Monocyte	CL:0000576	GSE8921_UNSTIM_VS_TLR1_2_STIM_MONOCYTE_3H	0.01338107	0.064712349	-97.90732436	0.692620294	WITHDRAWN	histamine receptor antagonist	KCNH1, KCNH2, CHRM2, CHRM1, HRH1, CHRM5, CHRM4, CHRM3	3756, 3757, 1129, 1128, 3269, 1133, 1132, 1131	SIGNATURE	Homo sapiens	IN_VITRO
terfenadine	5405	terfenadine inhibits Neutrophil compared to Neutrophil stimulated with S.aureus	Neutrophil	CL:0000775	Neutrophil	CL:0000775	Neutrophil	CL:0000775	Neutrophil	CL:0000775	GSE2405_S_AUREUS_VS_UNTREATED_NEUTROPHIL		0.008723863	-97.4076837	0.692620294	WITHDRAWN	histamine receptor antagonist	KCNH1, KCNH2, CHRM2, CHRM1, HRH1, CHRM5, CHRM4, CHRM3	3756, 3757, 1129, 1128, 3269, 1133, 1132, 1131	SIGNATURE_DOWN	Homo sapiens	EX_VIVO
terfenadine	5405	terfenadine inhibits Neutrophil compared to Neutrophil stimulated with LPS	Neutrophil	CL:0000775	Neutrophil	CL:0000775	Neutrophil	CL:0000775	Neutrophil	CL:0000775	GSE22103_UNSTIM_VS_LPS_STIM_NEUTROPHIL	0.448042547	0.008415941	-98.5799701	0.692620294	WITHDRAWN	histamine receptor antagonist	KCNH1, KCNH2, CHRM2, CHRM1, HRH1, CHRM5, CHRM4, CHRM3	3756, 3757, 1129, 1128, 3269, 1133, 1132, 1131	SIGNATURE	Homo sapiens	IN_VIVO
terfenadine	5405	terfenadine inhibits PBMC stimulated with TIV Influenza vaccine compared to PBMC	PBMC	CL:2000001	PBMC	CL:2000001	PBMC	CL:2000001	PBMC	CL:2000001	GSE29614_CTRL_VS_DAY7_TIV_FLU_VACCINE_PBMC		0.008723863	-96.32599776	0.692620294	WITHDRAWN	histamine receptor antagonist	KCNH1, KCNH2, CHRM2, CHRM1, HRH1, CHRM5, CHRM4, CHRM3	3756, 3757, 1129, 1128, 3269, 1133, 1132, 1131	SIGNATURE_DOWN	Homo sapiens	UNKNOWN
terfenadine	5405	terfenadine inhibits PBMC stimulated with TIV Influenza vaccine compared to PBMC	PBMC	CL:2000001	PBMC	CL:2000001	PBMC	CL:2000001	PBMC	CL:2000001	GSE29614_CTRL_VS_TIV_FLU_VACCINE_PBMC_2007		0.008723863	-97.22118612	0.692620294	WITHDRAWN	histamine receptor antagonist	KCNH1, KCNH2, CHRM2, CHRM1, HRH1, CHRM5, CHRM4, CHRM3	3756, 3757, 1129, 1128, 3269, 1133, 1132, 1131	SIGNATURE_DOWN	Homo sapiens	UNKNOWN
terfenadine	5405	terfenadine inhibits PBMC stimulated with Influenza compared to PBMC stimulated with S.aureus	PBMC	CL:2000001	PBMC	CL:2000001	PBMC	CL:2000001	PBMC	CL:2000001	GSE6269_FLU_VS_STAPH_AUREUS_INF_PBMC	0.164311872	0.008415941	-98.31838565	0.692620294	WITHDRAWN	histamine receptor antagonist	KCNH1, KCNH2, CHRM2, CHRM1, HRH1, CHRM5, CHRM4, CHRM3	3756, 3757, 1129, 1128, 3269, 1133, 1132, 1131	SIGNATURE	Homo sapiens	PATIENT
terfenadine	5405	terfenadine inhibits PBMC compared to PBMC stimulated with CSF3	PBMC	CL:2000001	PBMC	CL:2000001	PBMC	CL:2000001	PBMC	CL:2000001	GSE7400_CTRL_VS_CSF3_IN_VIVO_TREATED_PBMC	0.01338107	0.038535439	-99.28998505	0.692620294	WITHDRAWN	histamine receptor antagonist	KCNH1, KCNH2, CHRM2, CHRM1, HRH1, CHRM5, CHRM4, CHRM3	3756, 3757, 1129, 1128, 3269, 1133, 1132, 1131	SIGNATURE	Homo sapiens	IN_VIVO
terfenadine	5405	terfenadine inhibits CD25+ T regulatory stimulated with IL4 compared to CD25- T cell stimulated with IL4	T cell	CL:0000084	T regulatory	CL:0000084	T cell	CL:0000815	T cell	CL:0000084	GSE24634_TREG_VS_TCONV_POST_DAY7_IL4_CONVERSION	0.01338107	0.008415941	-95.40358744	0.692620294	WITHDRAWN	histamine receptor antagonist	KCNH1, KCNH2, CHRM2, CHRM1, HRH1, CHRM5, CHRM4, CHRM3	3756, 3757, 1129, 1128, 3269, 1133, 1132, 1131	SIGNATURE	Homo sapiens	EX_VIVO
terfenadine	5405	terfenadine inhibits T helper 1 stimulated with IL12 compared to T helper 1 stimulated with IFNa	T cell	CL:0000084	T helper 1	CL:0000084	T cell	CL:0000545	T helper 1	CL:0000545	GSE20198_IL12_VS_IFNA_TREATED_ACT_CD4_TCELL	0.130695751	0.396402372	-95.59043348	0.692620294	WITHDRAWN	histamine receptor antagonist	KCNH1, KCNH2, CHRM2, CHRM1, HRH1, CHRM5, CHRM4, CHRM3	3756, 3757, 1129, 1128, 3269, 1133, 1132, 1131	SIGNATURE	Homo sapiens	IN_VITRO
terfenadine	5405	terfenadine inhibits T regulatory compared to T CD8+	T cell	CL:0000084	T CD8+	CL:0000084	T cell	CL:0002437	T regulatory	CL:0000815	GSE7460_CD8_TCELL_VS_TREG_ACT		0.008723863	-95.65460649	0.692620294	WITHDRAWN	histamine receptor antagonist	KCNH1, KCNH2, CHRM2, CHRM1, HRH1, CHRM5, CHRM4, CHRM3	3756, 3757, 1129, 1128, 3269, 1133, 1132, 1131	SIGNATURE_DOWN	Homo sapiens	EX_VIVO
terfenadine	5405	terfenadine inhibits CD25+ T regulatory stimulated with IL4 compared to CD25- T cell stimulated with IL4	T cell	CL:0000084	T regulatory	CL:0000084	T cell	CL:0000815	T cell	CL:0000084	GSE24634_TREG_VS_TCONV_POST_DAY5_IL4_CONVERSION	0.01338107	0.008415941	-95.6651719	0.692620294	WITHDRAWN	histamine receptor antagonist	KCNH1, KCNH2, CHRM2, CHRM1, HRH1, CHRM5, CHRM4, CHRM3	3756, 3757, 1129, 1128, 3269, 1133, 1132, 1131	SIGNATURE	Homo sapiens	EX_VIVO
terfenadine	5405	terfenadine inhibits T cell compared to T CD4+ naïve	T cell	CL:0000084	T cell	CL:0000084	T cell	CL:0000084	T CD4+ naïve	CL:0000895	GSE1460_INTRATHYMIC_T_PROGENITOR_VS_NAIVE_CD4_TCELL_ADULT_BLOOD	0.008723863		-95.78515479	0.692620294	WITHDRAWN	histamine receptor antagonist	KCNH1, KCNH2, CHRM2, CHRM1, HRH1, CHRM5, CHRM4, CHRM3	3756, 3757, 1129, 1128, 3269, 1133, 1132, 1131	SIGNATURE_UP	Homo sapiens	UNKNOWN
terfenadine	5405	terfenadine inhibits T regulatory stimulated with TGFB compared to T cell stimulated with TGFB	T cell	CL:0000084	T regulatory	CL:0000084	T cell	CL:0000815	T cell	CL:0000084	GSE7460_TREG_VS_TCONV_ACT_WITH_TGFB	0.985937309	0.008415941	-96.22571001	0.692620294	WITHDRAWN	histamine receptor antagonist	KCNH1, KCNH2, CHRM2, CHRM1, HRH1, CHRM5, CHRM4, CHRM3	3756, 3757, 1129, 1128, 3269, 1133, 1132, 1131	SIGNATURE	Homo sapiens	EX_VIVO
terfenadine	5405	terfenadine inhibits T regulatory compared to T regulatory stimulated with TGFB	T cell	CL:0000084	T regulatory	CL:0000084	T cell	CL:0000815	T regulatory	CL:0000815	GSE7460_CTRL_VS_TGFB_TREATED_ACT_TREG	0.008723863		-96.36329728	0.692620294	WITHDRAWN	histamine receptor antagonist	KCNH1, KCNH2, CHRM2, CHRM1, HRH1, CHRM5, CHRM4, CHRM3	3756, 3757, 1129, 1128, 3269, 1133, 1132, 1131	SIGNATURE_UP	Homo sapiens	EX_VIVO
terfenadine	5405	terfenadine inhibits T CD8+ naïve compared to Monocyte	T cell	CL:0000084	T CD8+ naïve	CL:0000576	Monocyte	CL:0000898	Monocyte	CL:0000576	GSE22886_NAIVE_CD8_TCELL_VS_MONOCYTE	0.152086068	0.008415941	-96.44992526	0.692620294	WITHDRAWN	histamine receptor antagonist	KCNH1, KCNH2, CHRM2, CHRM1, HRH1, CHRM5, CHRM4, CHRM3	3756, 3757, 1129, 1128, 3269, 1133, 1132, 1131	SIGNATURE	Homo sapiens	IN_SILICO
terfenadine	5405	terfenadine inhibits T CD4+ stimulated with IL4 and anti-IL12 compared to T CD4+	T cell	CL:0000084	T CD4+	CL:0000084	T cell	CL:0000624	T CD4+	CL:0000624	GSE17974_CTRL_VS_ACT_IL4_AND_ANTI_IL12_24H_CD4_TCELL		0.008723863	-96.92279	0.692620294	WITHDRAWN	histamine receptor antagonist	KCNH1, KCNH2, CHRM2, CHRM1, HRH1, CHRM5, CHRM4, CHRM3	3756, 3757, 1129, 1128, 3269, 1133, 1132, 1131	SIGNATURE_DOWN	Homo sapiens	EX_VIVO
terfenadine	5405	terfenadine inhibits T CD4+ stimulated with cultured (24 hours) compared to T CD4+ stimulated with cultured (0 hours)	T cell	CL:0000084	T CD4+	CL:0000084	T cell	CL:0000624	T CD4+	CL:0000624	GSE17974_0H_VS_24H_IN_VITRO_ACT_CD4_TCELL		0.008723863	-97.20253637	0.692620294	WITHDRAWN	histamine receptor antagonist	KCNH1, KCNH2, CHRM2, CHRM1, HRH1, CHRM5, CHRM4, CHRM3	3756, 3757, 1129, 1128, 3269, 1133, 1132, 1131	SIGNATURE_DOWN	Homo sapiens	EX_VIVO
terfenadine	5405	terfenadine inhibits CD25+ T CD4+ effector compared to CD25- T cell	T cell	CL:0000084	T CD4+ effector	CL:0000084	T cell	CL:0001044	T cell	CL:0000084	GSE24634_TEFF_VS_TCONV_DAY3_IN_CULTURE	0.008723863		-97.48228273	0.692620294	WITHDRAWN	histamine receptor antagonist	KCNH1, KCNH2, CHRM2, CHRM1, HRH1, CHRM5, CHRM4, CHRM3	3756, 3757, 1129, 1128, 3269, 1133, 1132, 1131	SIGNATURE_UP	Homo sapiens	EX_VIVO
terfenadine	5405	terfenadine inhibits T CD4+ compared to T CD4+ stimulated with allergen in Allergy	T cell	CL:0000084	T CD4+	CL:0000084	T cell	CL:0000624	T CD4+	CL:0000624	GSE14908_RESTING_VS_HDM_STIM_CD4_TCELL_ATOPIC_PATIENT	0.032953068	0.092899463	-97.53363229	0.692620294	WITHDRAWN	histamine receptor antagonist	KCNH1, KCNH2, CHRM2, CHRM1, HRH1, CHRM5, CHRM4, CHRM3	3756, 3757, 1129, 1128, 3269, 1133, 1132, 1131	SIGNATURE	Homo sapiens	PATIENT
terfenadine	5405	terfenadine inhibits CD25+ T CD4+ effector compared to CD25- T cell	T cell	CL:0000084	T CD4+ effector	CL:0000084	T cell	CL:0001044	T cell	CL:0000084	GSE24634_TEFF_VS_TCONV_DAY5_IN_CULTURE	0.008723863		-97.57553152	0.692620294	WITHDRAWN	histamine receptor antagonist	KCNH1, KCNH2, CHRM2, CHRM1, HRH1, CHRM5, CHRM4, CHRM3	3756, 3757, 1129, 1128, 3269, 1133, 1132, 1131	SIGNATURE_UP	Homo sapiens	EX_VIVO
terfenadine	5405	terfenadine inhibits CD25+ T regulatory stimulated with IL4 compared to CD25- T cell stimulated with IL4	T cell	CL:0000084	T regulatory	CL:0000084	T cell	CL:0000815	T cell	CL:0000084	GSE24634_TREG_VS_TCONV_POST_DAY3_IL4_CONVERSION	0.008723863		-98.04177546	0.692620294	WITHDRAWN	histamine receptor antagonist	KCNH1, KCNH2, CHRM2, CHRM1, HRH1, CHRM5, CHRM4, CHRM3	3756, 3757, 1129, 1128, 3269, 1133, 1132, 1131	SIGNATURE_UP	Homo sapiens	EX_VIVO
terfenadine	5405	terfenadine inhibits CD25+ T CD4+ effector compared to CD25- T cell	T cell	CL:0000084	T CD4+ effector	CL:0000084	T cell	CL:0001044	T cell	CL:0000084	GSE24634_TEFF_VS_TCONV_DAY5_IN_CULTURE	0.01338107	0.008415941	-98.0568012	0.692620294	WITHDRAWN	histamine receptor antagonist	KCNH1, KCNH2, CHRM2, CHRM1, HRH1, CHRM5, CHRM4, CHRM3	3756, 3757, 1129, 1128, 3269, 1133, 1132, 1131	SIGNATURE	Homo sapiens	EX_VIVO
terfenadine	5405	terfenadine inhibits CD25+ T CD4+ effector compared to CD25- T cell	T cell	CL:0000084	T CD4+ effector	CL:0000084	T cell	CL:0001044	T cell	CL:0000084	GSE24634_TEFF_VS_TCONV_DAY7_IN_CULTURE	0.01338107	0.008415941	-98.13153961	0.692620294	WITHDRAWN	histamine receptor antagonist	KCNH1, KCNH2, CHRM2, CHRM1, HRH1, CHRM5, CHRM4, CHRM3	3756, 3757, 1129, 1128, 3269, 1133, 1132, 1131	SIGNATURE	Homo sapiens	EX_VIVO
terfenadine	5405	terfenadine inhibits T cell stimulated with TNF compared to T regulatory stimulated with TNF	T cell	CL:0000084	T cell	CL:0000084	T cell	CL:0000084	T regulatory	CL:0000815	GSE18893_TCONV_VS_TREG_24H_TNF_STIM	0.008723863		-98.30287206	0.692620294	WITHDRAWN	histamine receptor antagonist	KCNH1, KCNH2, CHRM2, CHRM1, HRH1, CHRM5, CHRM4, CHRM3	3756, 3757, 1129, 1128, 3269, 1133, 1132, 1131	SIGNATURE_UP	Homo sapiens	IN_VITRO
terfenadine	5405	terfenadine inhibits CD25+ T regulatory stimulated with IL4 compared to CD25- T cell stimulated with IL4	T cell	CL:0000084	T regulatory	CL:0000084	T cell	CL:0000815	T cell	CL:0000084	GSE24634_TREG_VS_TCONV_POST_DAY5_IL4_CONVERSION	0.008723863		-98.48936964	0.692620294	WITHDRAWN	histamine receptor antagonist	KCNH1, KCNH2, CHRM2, CHRM1, HRH1, CHRM5, CHRM4, CHRM3	3756, 3757, 1129, 1128, 3269, 1133, 1132, 1131	SIGNATURE_UP	Homo sapiens	EX_VIVO
terfenadine	5405	terfenadine inhibits old T CD4+ memory stimulated with TSST compared to old T CD4+ memory	T cell	CL:0000084	T CD4+ memory	CL:0000084	T cell	CL:0000897	T CD4+ memory	CL:0000897	GSE36476_CTRL_VS_TSST_ACT_72H_MEMORY_CD4_TCELL_OLD		0.008723863	-98.6385677	0.692620294	WITHDRAWN	histamine receptor antagonist	KCNH1, KCNH2, CHRM2, CHRM1, HRH1, CHRM5, CHRM4, CHRM3	3756, 3757, 1129, 1128, 3269, 1133, 1132, 1131	SIGNATURE_DOWN	Homo sapiens	EX_VIVO
terfenadine	5405	terfenadine inhibits CD25- T CD4+ naïve stimulated with IL4 compared to CD25- T CD4+ naïve	T cell	CL:0000084	T CD4+ naïve	CL:0000084	T cell	CL:0000895	T CD4+ naïve	CL:0000895	GSE24634_IL4_VS_CTRL_TREATED_NAIVE_CD4_TCELL_DAY7	0.01338107	0.008415941	-98.80418535	0.692620294	WITHDRAWN	histamine receptor antagonist	KCNH1, KCNH2, CHRM2, CHRM1, HRH1, CHRM5, CHRM4, CHRM3	3756, 3757, 1129, 1128, 3269, 1133, 1132, 1131	SIGNATURE	Homo sapiens	EX_VIVO
terfenadine	5405	terfenadine inhibits old T CD4+ memory stimulated with TSST compared to old T CD4+ memory	T cell	CL:0000084	T CD4+ memory	CL:0000084	T cell	CL:0000897	T CD4+ memory	CL:0000897	GSE36476_CTRL_VS_TSST_ACT_40H_MEMORY_CD4_TCELL_OLD		0.008723863	-98.80641552	0.692620294	WITHDRAWN	histamine receptor antagonist	KCNH1, KCNH2, CHRM2, CHRM1, HRH1, CHRM5, CHRM4, CHRM3	3756, 3757, 1129, 1128, 3269, 1133, 1132, 1131	SIGNATURE_DOWN	Homo sapiens	EX_VIVO
terfenadine	5405	terfenadine inhibits young T CD4+ memory stimulated with TSST compared to young T CD4+ memory	T cell	CL:0000084	T CD4+ memory	CL:0000084	T cell	CL:0000897	T CD4+ memory	CL:0000897	GSE36476_CTRL_VS_TSST_ACT_72H_MEMORY_CD4_TCELL_YOUNG		0.008723863	-98.88101455	0.692620294	WITHDRAWN	histamine receptor antagonist	KCNH1, KCNH2, CHRM2, CHRM1, HRH1, CHRM5, CHRM4, CHRM3	3756, 3757, 1129, 1128, 3269, 1133, 1132, 1131	SIGNATURE_DOWN	Homo sapiens	EX_VIVO
terfenadine	5405	terfenadine inhibits CD25+ T regulatory stimulated with IL4 compared to CD25- T cell stimulated with IL4	T cell	CL:0000084	T regulatory	CL:0000084	T cell	CL:0000815	T cell	CL:0000084	GSE24634_TREG_VS_TCONV_POST_DAY7_IL4_CONVERSION	0.008723863		-99.04886236	0.692620294	WITHDRAWN	histamine receptor antagonist	KCNH1, KCNH2, CHRM2, CHRM1, HRH1, CHRM5, CHRM4, CHRM3	3756, 3757, 1129, 1128, 3269, 1133, 1132, 1131	SIGNATURE_UP	Homo sapiens	EX_VIVO
terfenadine	5405	terfenadine inhibits CD25+ T CD4+ effector compared to CD25- T cell	T cell	CL:0000084	T CD4+ effector	CL:0000084	T cell	CL:0001044	T cell	CL:0000084	GSE24634_TEFF_VS_TCONV_DAY7_IN_CULTURE	0.008723863		-99.16076091	0.692620294	WITHDRAWN	histamine receptor antagonist	KCNH1, KCNH2, CHRM2, CHRM1, HRH1, CHRM5, CHRM4, CHRM3	3756, 3757, 1129, 1128, 3269, 1133, 1132, 1131	SIGNATURE_UP	Homo sapiens	EX_VIVO
terfenadine	5405	terfenadine inhibits young T CD4+ memory stimulated with TSST compared to young T CD4+ memory	T cell	CL:0000084	T CD4+ memory	CL:0000084	T cell	CL:0000897	T CD4+ memory	CL:0000897	GSE36476_CTRL_VS_TSST_ACT_40H_MEMORY_CD4_TCELL_YOUNG		0.008723863	-99.2540097	0.692620294	WITHDRAWN	histamine receptor antagonist	KCNH1, KCNH2, CHRM2, CHRM1, HRH1, CHRM5, CHRM4, CHRM3	3756, 3757, 1129, 1128, 3269, 1133, 1132, 1131	SIGNATURE_DOWN	Homo sapiens	EX_VIVO
terfenadine	5405	terfenadine inhibits T cell stimulated with TNF compared to T regulatory stimulated with TNF	T cell	CL:0000084	T cell	CL:0000084	T cell	CL:0000084	T regulatory	CL:0000815	GSE18893_TCONV_VS_TREG_24H_TNF_STIM	0.01338107	0.933211144	-99.70104634	0.692620294	WITHDRAWN	histamine receptor antagonist	KCNH1, KCNH2, CHRM2, CHRM1, HRH1, CHRM5, CHRM4, CHRM3	3756, 3757, 1129, 1128, 3269, 1133, 1132, 1131	SIGNATURE	Homo sapiens	IN_VITRO
prochlorperazine	4917	prochlorperazine inhibits B cell memory compared to B cell na茂ve	B cell	CL:0000236	B cell memory	CL:0000236	B cell	CL:0000787	B cell na茂ve	CL:0000788	GSE17186_MEMORY_VS_NAIVE_BCELL	0.070558456	0.922753547	-97.19730942	0.538845157	APPROVED	dopamine receptor antagonist	DRD1, DRD4, DRD2, DRD3	1812, 1815, 1813, 1814	SIGNATURE	Homo sapiens	PATIENT
prochlorperazine	4917	prochlorperazine inhibits B cell memory compared to B1 B cell	B cell	CL:0000236	B cell memory	CL:0000236	B cell	CL:0000787	B cell	CL:0000236	GSE42724_MEMORY_VS_B1_BCELL	0.303772804	0.013897112	-99.10313901	0.538845157	APPROVED	dopamine receptor antagonist	DRD1, DRD4, DRD2, DRD3	1812, 1815, 1813, 1814	SIGNATURE	Homo sapiens	IN_VITRO
prochlorperazine	4917	prochlorperazine inhibits B1 B cell compared to B cell na茂ve	B cell	CL:0000236	B cell na茂ve	CL:0000236	B cell	CL:0000788	B cell	CL:0000236	GSE42724_NAIVE_VS_B1_BCELL		0.013440011	-99.19806043	0.538845157	APPROVED	dopamine receptor antagonist	DRD1, DRD4, DRD2, DRD3	1812, 1815, 1813, 1814	SIGNATURE_DOWN	Homo sapiens	IN_VITRO
prochlorperazine	4917	prochlorperazine inhibits B cell na茂ve compared to Neutrophil	B cell	CL:0000236	B cell na茂ve	CL:0000775	Neutrophil	CL:0000788	Neutrophil	CL:0000775	GSE22886_NAIVE_BCELL_VS_NEUTROPHIL	0.013191364	0.013897112	-99.55156951	0.538845157	APPROVED	dopamine receptor antagonist	DRD1, DRD4, DRD2, DRD3	1812, 1815, 1813, 1814	SIGNATURE	Homo sapiens	IN_SILICO
prochlorperazine	4917	prochlorperazine inhibits B cell na茂ve compared to Neutrophil	B cell	CL:0000236	B cell na茂ve	CL:0000775	Neutrophil	CL:0000788	Neutrophil	CL:0000775	GSE22886_NAIVE_BCELL_VS_NEUTROPHIL	0.013440011		-99.57105558	0.538845157	APPROVED	dopamine receptor antagonist	DRD1, DRD4, DRD2, DRD3	1812, 1815, 1813, 1814	SIGNATURE_UP	Homo sapiens	IN_SILICO
prochlorperazine	4917	prochlorperazine inhibits Dendritic cell stimulated with L.donovani compared to Dendritic cell	Dendritic cell	CL:0000451	Dendritic cell	CL:0000451	Dendritic cell	CL:0000451	Dendritic cell	CL:0000451	GSE42088_UNINF_VS_LEISHMANIA_INF_DC_2H		0.013440011	-95.02051473	0.538845157	APPROVED	dopamine receptor antagonist	DRD1, DRD4, DRD2, DRD3	1812, 1815, 1813, 1814	SIGNATURE_DOWN	Homo sapiens	IN_VITRO
prochlorperazine	4917	prochlorperazine inhibits Dendritic cell compared to Dendritic cell stimulated with HIV	Dendritic cell	CL:0000451	Dendritic cell	CL:0000451	Dendritic cell	CL:0000451	Dendritic cell	CL:0000451	GSE22589_HEALTHY_VS_HIV_INFECTED_DC	0.013440011		-95.87840358	0.538845157	APPROVED	dopamine receptor antagonist	DRD1, DRD4, DRD2, DRD3	1812, 1815, 1813, 1814	SIGNATURE_UP	Homo sapiens	IN_VITRO
prochlorperazine	4917	prochlorperazine inhibits Dendritic cell stimulated with B.malayi compared to Macrophage stimulated with B.malayi	Dendritic cell	CL:0000451	Dendritic cell	CL:0000235	Macrophage	CL:0000451	Macrophage	CL:0000235	GSE360_DC_VS_MAC_B_MALAYI_HIGH_DOSE	0.041169737	0.013897112	-96.07623318	0.538845157	APPROVED	dopamine receptor antagonist	DRD1, DRD4, DRD2, DRD3	1812, 1815, 1813, 1814	SIGNATURE	Homo sapiens	IN_VITRO
prochlorperazine	4917	prochlorperazine inhibits Dendritic cell compared to Dendritic cell stimulated with IL6, TNFa, IL1B and PGE	Dendritic cell	CL:0000451	Dendritic cell	CL:0000451	Dendritic cell	CL:0000451	Dendritic cell	CL:0000451	GSE7509_UNSTIM_VS_TNFA_IL1B_IL6_PGE_STIM_DC	0.013440011		-97.18388661	0.538845157	APPROVED	dopamine receptor antagonist	DRD1, DRD4, DRD2, DRD3	1812, 1815, 1813, 1814	SIGNATURE_UP	Homo sapiens	IN_VITRO
prochlorperazine	4917	prochlorperazine inhibits Dendritic cell compared to Dendritic cell	Dendritic cell	CL:0000451	Dendritic cell	CL:0000451	Dendritic cell	CL:0000451	Dendritic cell	CL:0000451	GSE14000_TRANSLATED_RNA_VS_MRNA_DC		0.013440011	-97.29578515	0.538845157	APPROVED	dopamine receptor antagonist	DRD1, DRD4, DRD2, DRD3	1812, 1815, 1813, 1814	SIGNATURE_DOWN	Homo sapiens	EX_VIVO
prochlorperazine	4917	prochlorperazine inhibits Dendritic cell stimulated with LPS compared to Dendritic cell	Dendritic cell	CL:0000451	Dendritic cell	CL:0000451	Dendritic cell	CL:0000451	Dendritic cell	CL:0000451	GSE14000_TRANSLATED_RNA_VS_MRNA_16H_LPS_DC		0.013440011	-97.38903394	0.538845157	APPROVED	dopamine receptor antagonist	DRD1, DRD4, DRD2, DRD3	1812, 1815, 1813, 1814	SIGNATURE_DOWN	Homo sapiens	EX_VIVO
prochlorperazine	4917	prochlorperazine inhibits Dendritic cell compared to Dendritic cell stimulated with Newcastle virus	Dendritic cell	CL:0000451	Dendritic cell	CL:0000451	Dendritic cell	CL:0000451	Dendritic cell	CL:0000451	GSE18791_UNSTIM_VS_NEWCATSLE_VIRUS_DC_18H	0.013440011		-97.81797837	0.538845157	APPROVED	dopamine receptor antagonist	DRD1, DRD4, DRD2, DRD3	1812, 1815, 1813, 1814	SIGNATURE_UP	Homo sapiens	IN_VITRO
prochlorperazine	4917	prochlorperazine inhibits Dendritic cell compared to Dendritic cell stimulated with Rosiglitazone	Dendritic cell	CL:0000451	Dendritic cell	CL:0000451	Dendritic cell	CL:0000451	Dendritic cell	CL:0000451	GSE5679_CTRL_VS_PPARG_LIGAND_ROSIGLITAZONE_TREATED_DC	0.013440011		-98.60126818	0.538845157	APPROVED	dopamine receptor antagonist	DRD1, DRD4, DRD2, DRD3	1812, 1815, 1813, 1814	SIGNATURE_UP	Homo sapiens	EX_VIVO
prochlorperazine	4917	prochlorperazine inhibits Macrophage stimulated with IL4 compared to Macrophage stimulated with IL4 and Dexamethasone	Macrophage	CL:0000235	Macrophage	CL:0000235	Macrophage	CL:0000235	Macrophage	CL:0000235	GSE7568_IL4_VS_IL4_AND_DEXAMETHASONE_TREATED_MACROPHAGE	0.013440011		-95.03916449	0.538845157	APPROVED	dopamine receptor antagonist	DRD1, DRD4, DRD2, DRD3	1812, 1815, 1813, 1814	SIGNATURE_UP	Homo sapiens	IN_VITRO
prochlorperazine	4917	prochlorperazine inhibits Macrophage stimulated with IL4 and TGFB compared to Macrophage stimulated with IL4	Macrophage	CL:0000235	Macrophage	CL:0000235	Macrophage	CL:0000235	Macrophage	CL:0000235	GSE7568_IL4_VS_IL4_AND_TGFB_TREATED_MACROPHAGE_24H		0.013440011	-95.13241328	0.538845157	APPROVED	dopamine receptor antagonist	DRD1, DRD4, DRD2, DRD3	1812, 1815, 1813, 1814	SIGNATURE_DOWN	Homo sapiens	IN_VITRO
prochlorperazine	4917	prochlorperazine inhibits T helper 2 compared to Macrophage	Macrophage	CL:0000235	Macrophage	CL:0000084	T cell	CL:0000235	T helper 2	CL:0000546	GSE3982_MAC_VS_TH2		0.013440011	-95.33756061	0.538845157	APPROVED	dopamine receptor antagonist	DRD1, DRD4, DRD2, DRD3	1812, 1815, 1813, 1814	SIGNATURE_DOWN	Homo sapiens	UNKNOWN
prochlorperazine	4917	prochlorperazine inhibits Macrophage stimulated with IL4, Dexamethasone and TGFB compared to Macrophage stimulated with IL4 and TGFB	Macrophage	CL:0000235	Macrophage	CL:0000235	Macrophage	CL:0000235	Macrophage	CL:0000235	GSE7568_IL4_TGFB_DEXAMETHASONE_VS_IL4_TGFB_TREATED_MACROPHAGE	0.013440011		-97.01603879	0.538845157	APPROVED	dopamine receptor antagonist	DRD1, DRD4, DRD2, DRD3	1812, 1815, 1813, 1814	SIGNATURE_UP	Homo sapiens	IN_VITRO
prochlorperazine	4917	prochlorperazine inhibits Macrophage compared to Macrophage stimulated with CSF1	Macrophage	CL:0000235	Macrophage	CL:0000235	Macrophage	CL:0000235	Macrophage	CL:0000235	GSE11864_UNTREATED_VS_CSF1_IN_MAC	0.013191364	0.586746054	-97.04783259	0.538845157	APPROVED	dopamine receptor antagonist	DRD1, DRD4, DRD2, DRD3	1812, 1815, 1813, 1814	SIGNATURE	Homo sapiens	IN_VITRO
prochlorperazine	4917	prochlorperazine inhibits Monocyte compared to Monocyte stimulated with M. tuberculosis	Monocyte	CL:0000576	Monocyte	CL:0000576	Monocyte	CL:0000576	Monocyte	CL:0000576	GSE8921_UNSTIM_0H_VS_TLR1_2_STIM_MONOCYTE_12H	0.013440011		-95.48675867	0.538845157	APPROVED	dopamine receptor antagonist	DRD1, DRD4, DRD2, DRD3	1812, 1815, 1813, 1814	SIGNATURE_UP	Homo sapiens	IN_VITRO
prochlorperazine	4917	prochlorperazine inhibits Monocyte stimulated with M. tuberculosis compared to Monocyte	Monocyte	CL:0000576	Monocyte	CL:0000576	Monocyte	CL:0000576	Monocyte	CL:0000576	GSE34156_UNTREATED_VS_24H_TLR1_TLR2_LIGAND_TREATED_MONOCYTE		0.013440011	-95.89705334	0.538845157	APPROVED	dopamine receptor antagonist	DRD1, DRD4, DRD2, DRD3	1812, 1815, 1813, 1814	SIGNATURE_DOWN	Homo sapiens	IN_VITRO
prochlorperazine	4917	prochlorperazine inhibits Monocyte stimulated with Muramyl Dipeptide compared to Monocyte stimulated with Muramyl Dipeptide and M. tuberculosis	Monocyte	CL:0000576	Monocyte	CL:0000576	Monocyte	CL:0000576	Monocyte	CL:0000576	GSE34156_NOD2_LIGAND_VS_NOD2_AND_TLR1_TLR2_LIGAND_6H_TREATED_MONOCYTE	0.013440011		-98.153674	0.538845157	APPROVED	dopamine receptor antagonist	DRD1, DRD4, DRD2, DRD3	1812, 1815, 1813, 1814	SIGNATURE_UP	Homo sapiens	IN_VITRO
prochlorperazine	4917	prochlorperazine inhibits B cell compared to Neutrophil	Neutrophil	CL:0000775	Neutrophil	CL:0000236	B cell	CL:0000775	B cell	CL:0000236	GSE3982_NEUTROPHIL_VS_BCELL		0.013440011	-95.20701231	0.538845157	APPROVED	dopamine receptor antagonist	DRD1, DRD4, DRD2, DRD3	1812, 1815, 1813, 1814	SIGNATURE_DOWN	Homo sapiens	UNKNOWN
prochlorperazine	4917	prochlorperazine inhibits Neutrophil compared to Neutrophil stimulated with A.phagocytophilum	Neutrophil	CL:0000775	Neutrophil	CL:0000775	Neutrophil	CL:0000775	Neutrophil	CL:0000775	GSE2405_0H_VS_24H_A_PHAGOCYTOPHILUM_STIM_NEUTROPHIL	0.013191364	0.240898323	-95.81464873	0.538845157	APPROVED	dopamine receptor antagonist	DRD1, DRD4, DRD2, DRD3	1812, 1815, 1813, 1814	SIGNATURE	Homo sapiens	EX_VIVO
prochlorperazine	4917	prochlorperazine inhibits T CD4+ memory compared to Neutrophil	Neutrophil	CL:0000775	Neutrophil	CL:0000084	T cell	CL:0000775	T CD4+ memory	CL:0000897	GSE3982_NEUTROPHIL_VS_CENT_MEMORY_CD4_TCELL		0.013440011	-97.78067885	0.538845157	APPROVED	dopamine receptor antagonist	DRD1, DRD4, DRD2, DRD3	1812, 1815, 1813, 1814	SIGNATURE_DOWN	Homo sapiens	UNKNOWN
prochlorperazine	4917	prochlorperazine inhibits Dendritic cell compared to Neutrophil	Neutrophil	CL:0000775	Neutrophil	CL:0000451	Dendritic cell	CL:0000775	Dendritic cell	CL:0000451	GSE22886_NEUTROPHIL_VS_DC		0.013440011	-98.30287206	0.538845157	APPROVED	dopamine receptor antagonist	DRD1, DRD4, DRD2, DRD3	1812, 1815, 1813, 1814	SIGNATURE_DOWN	Homo sapiens	IN_SILICO
prochlorperazine	4917	prochlorperazine inhibits Monocyte compared to Neutrophil	Neutrophil	CL:0000775	Neutrophil	CL:0000576	Monocyte	CL:0000775	Monocyte	CL:0000576	GSE22886_NEUTROPHIL_VS_MONOCYTE		0.013440011	-98.54531891	0.538845157	APPROVED	dopamine receptor antagonist	DRD1, DRD4, DRD2, DRD3	1812, 1815, 1813, 1814	SIGNATURE_DOWN	Homo sapiens	IN_SILICO
prochlorperazine	4917	prochlorperazine inhibits Neutrophil stimulated with HL60 lysate compared to Neutrophil stimulated with A.phagocytophilum	Neutrophil	CL:0000775	Neutrophil	CL:0000775	Neutrophil	CL:0000775	Neutrophil	CL:0000775	GSE2405_HEAT_KILLED_VS_LIVE_A_PHAGOCYTOPHILUM_STIM_NEUTROPHIL_9H	0.013191364	0.386962432	-99.73841555	0.538845157	APPROVED	dopamine receptor antagonist	DRD1, DRD4, DRD2, DRD3	1812, 1815, 1813, 1814	SIGNATURE	Homo sapiens	EX_VIVO
prochlorperazine	4917	prochlorperazine inhibits Neutrophil stimulated with A.phagocytophilum compared to Neutrophil	Neutrophil	CL:0000775	Neutrophil	CL:0000775	Neutrophil	CL:0000775	Neutrophil	CL:0000775	GSE2405_0H_VS_9H_A_PHAGOCYTOPHILUM_STIM_NEUTROPHIL		0.013440011	-99.73890339	0.538845157	APPROVED	dopamine receptor antagonist	DRD1, DRD4, DRD2, DRD3	1812, 1815, 1813, 1814	SIGNATURE_DOWN	Homo sapiens	EX_VIVO
prochlorperazine	4917	prochlorperazine inhibits Neutrophil compared to Neutrophil stimulated with A.phagocytophilum	Neutrophil	CL:0000775	Neutrophil	CL:0000775	Neutrophil	CL:0000775	Neutrophil	CL:0000775	GSE2405_0H_VS_24H_A_PHAGOCYTOPHILUM_STIM_NEUTROPHIL	0.013440011		-99.8694517	0.538845157	APPROVED	dopamine receptor antagonist	DRD1, DRD4, DRD2, DRD3	1812, 1815, 1813, 1814	SIGNATURE_UP	Homo sapiens	EX_VIVO
prochlorperazine	4917	prochlorperazine inhibits PBMC compared to PBMC stimulated with Influenza	PBMC	CL:2000001	PBMC	CL:2000001	PBMC	CL:2000001	PBMC	CL:2000001	GSE34205_HEALTHY_VS_FLU_INF_INFANT_PBMC	0.013440011		-95.69190601	0.538845157	APPROVED	dopamine receptor antagonist	DRD1, DRD4, DRD2, DRD3	1812, 1815, 1813, 1814	SIGNATURE_UP	Homo sapiens	PATIENT
prochlorperazine	4917	prochlorperazine inhibits PBMC compared to PBMC in Diabetes type 1	PBMC	CL:2000001	PBMC	CL:2000001	PBMC	CL:2000001	PBMC	CL:2000001	GSE9006_HEALTHY_VS_TYPE_1_DIABETES_PBMC_1MONTH_POST_DX	0.013191364	0.139326236	-96.18834081	0.538845157	APPROVED	dopamine receptor antagonist	DRD1, DRD4, DRD2, DRD3	1812, 1815, 1813, 1814	SIGNATURE	Homo sapiens	IN_VIVO
prochlorperazine	4917	prochlorperazine inhibits PBMC compared to PBMC in Diabetes type 1	PBMC	CL:2000001	PBMC	CL:2000001	PBMC	CL:2000001	PBMC	CL:2000001	GSE9006_HEALTHY_VS_TYPE_1_DIABETES_PBMC_1MONTH_POST_DX	0.013440011		-96.56844461	0.538845157	APPROVED	dopamine receptor antagonist	DRD1, DRD4, DRD2, DRD3	1812, 1815, 1813, 1814	SIGNATURE_UP	Homo sapiens	IN_VIVO
prochlorperazine	4917	prochlorperazine inhibits PBMC in Diabetes type 1 compared to PBMC in Diabetes (month 0)	PBMC	CL:2000001	PBMC	CL:2000001	PBMC	CL:2000001	PBMC	CL:2000001	GSE9006_TYPE_1_VS_TYPE_2_DIABETES_PBMC_AT_DX	0.013440011		-96.99738903	0.538845157	APPROVED	dopamine receptor antagonist	DRD1, DRD4, DRD2, DRD3	1812, 1815, 1813, 1814	SIGNATURE_UP	Homo sapiens	IN_VIVO
prochlorperazine	4917	prochlorperazine inhibits PBMC compared to PBMC stimulated with S.pneumo	PBMC	CL:2000001	PBMC	CL:2000001	PBMC	CL:2000001	PBMC	CL:2000001	GSE6269_HEALTHY_VS_STAPH_PNEUMO_INF_PBMC	0.071210846	0.013897112	-97.49626308	0.538845157	APPROVED	dopamine receptor antagonist	DRD1, DRD4, DRD2, DRD3	1812, 1815, 1813, 1814	SIGNATURE	Homo sapiens	PATIENT
prochlorperazine	4917	prochlorperazine inhibits PBMC compared to PBMC in Diabetes type 2	PBMC	CL:2000001	PBMC	CL:2000001	PBMC	CL:2000001	PBMC	CL:2000001	GSE9006_HEALTHY_VS_TYPE_2_DIABETES_PBMC_AT_DX	0.013191364	0.072932622	-97.68310912	0.538845157	APPROVED	dopamine receptor antagonist	DRD1, DRD4, DRD2, DRD3	1812, 1815, 1813, 1814	SIGNATURE	Homo sapiens	IN_VIVO
prochlorperazine	4917	prochlorperazine inhibits PBMC compared to PBMC in Diabetes type 1	PBMC	CL:2000001	PBMC	CL:2000001	PBMC	CL:2000001	PBMC	CL:2000001	GSE9006_HEALTHY_VS_TYPE_1_DIABETES_PBMC_4MONTH_POST_DX	0.013191364	0.021695685	-98.65470852	0.538845157	APPROVED	dopamine receptor antagonist	DRD1, DRD4, DRD2, DRD3	1812, 1815, 1813, 1814	SIGNATURE	Homo sapiens	IN_VIVO
prochlorperazine	4917	prochlorperazine inhibits PBMC compared to PBMC stimulated with CSF3	PBMC	CL:2000001	PBMC	CL:2000001	PBMC	CL:2000001	PBMC	CL:2000001	GSE7400_CTRL_VS_CSF3_IN_VIVO_TREATED_PBMC	0.013440011		-98.80641552	0.538845157	APPROVED	dopamine receptor antagonist	DRD1, DRD4, DRD2, DRD3	1812, 1815, 1813, 1814	SIGNATURE_UP	Homo sapiens	IN_VIVO
prochlorperazine	4917	prochlorperazine inhibits PBMC compared to PBMC stimulated with TIV Influenza vaccine	PBMC	CL:2000001	PBMC	CL:2000001	PBMC	CL:2000001	PBMC	CL:2000001	GSE29614_CTRL_VS_DAY3_TIV_FLU_VACCINE_PBMC	0.561539647	0.334612467	-98.95366218	0.538845157	APPROVED	dopamine receptor antagonist	DRD1, DRD4, DRD2, DRD3	1812, 1815, 1813, 1814	SIGNATURE	Homo sapiens	UNKNOWN
prochlorperazine	4917	prochlorperazine inhibits PBMC compared to PBMC stimulated with CSF3	PBMC	CL:2000001	PBMC	CL:2000001	PBMC	CL:2000001	PBMC	CL:2000001	GSE7400_CTRL_VS_CSF3_IN_VIVO_TREATED_PBMC	0.013191364	0.929073855	-98.99103139	0.538845157	APPROVED	dopamine receptor antagonist	DRD1, DRD4, DRD2, DRD3	1812, 1815, 1813, 1814	SIGNATURE	Homo sapiens	IN_VIVO
prochlorperazine	4917	prochlorperazine inhibits PBMC compared to PBMC in Diabetes type 2	PBMC	CL:2000001	PBMC	CL:2000001	PBMC	CL:2000001	PBMC	CL:2000001	GSE9006_HEALTHY_VS_TYPE_2_DIABETES_PBMC_AT_DX	0.013440011		-99.17941067	0.538845157	APPROVED	dopamine receptor antagonist	DRD1, DRD4, DRD2, DRD3	1812, 1815, 1813, 1814	SIGNATURE_UP	Homo sapiens	IN_VIVO
prochlorperazine	4917	prochlorperazine inhibits T CD4+ stimulated with IL4 and anti-IL12 compared to T CD4+	T cell	CL:0000084	T CD4+	CL:0000084	T cell	CL:0000624	T CD4+	CL:0000624	GSE17974_CTRL_VS_ACT_IL4_AND_ANTI_IL12_24H_CD4_TCELL		0.013440011	-95.37486013	0.538845157	APPROVED	dopamine receptor antagonist	DRD1, DRD4, DRD2, DRD3	1812, 1815, 1813, 1814	SIGNATURE_DOWN	Homo sapiens	EX_VIVO
prochlorperazine	4917	prochlorperazine inhibits T helper 1 compared to T CD4+ na茂ve	T cell	CL:0000084	T CD4+ na茂ve	CL:0000084	T cell	CL:0000895	T helper 1	CL:0000545	GSE22886_NAIVE_CD4_TCELL_VS_48H_ACT_TH1		0.013440011	-95.74785528	0.538845157	APPROVED	dopamine receptor antagonist	DRD1, DRD4, DRD2, DRD3	1812, 1815, 1813, 1814	SIGNATURE_DOWN	Homo sapiens	IN_SILICO
prochlorperazine	4917	prochlorperazine inhibits T CD8+ na茂ve compared to Neutrophil	T cell	CL:0000084	T CD8+ na茂ve	CL:0000775	Neutrophil	CL:0000898	Neutrophil	CL:0000775	GSE22886_NAIVE_CD8_TCELL_VS_NEUTROPHIL	0.013440011		-95.76650504	0.538845157	APPROVED	dopamine receptor antagonist	DRD1, DRD4, DRD2, DRD3	1812, 1815, 1813, 1814	SIGNATURE_UP	Homo sapiens	IN_SILICO
prochlorperazine	4917	prochlorperazine inhibits CD25+ T regulatory stimulated with IL4 compared to CD25- T cell stimulated with IL4	T cell	CL:0000084	T regulatory	CL:0000084	T cell	CL:0000815	T cell	CL:0000084	GSE24634_TREG_VS_TCONV_POST_DAY3_IL4_CONVERSION	0.013191364	0.013897112	-95.88938714	0.538845157	APPROVED	dopamine receptor antagonist	DRD1, DRD4, DRD2, DRD3	1812, 1815, 1813, 1814	SIGNATURE	Homo sapiens	EX_VIVO
prochlorperazine	4917	prochlorperazine inhibits VD2 T cell gamma/delta compared to VD2 T cell gamma/delta stimulated with LPS	T cell	CL:0000084	T cell gamma/delta	CL:0000084	T cell	CL:0000798	T cell gamma/delta	CL:0000798	GSE3720_UNSTIM_VS_LPS_STIM_VD2_GAMMADELTA_TCELL	0.013191364	0.021695685	-95.92675635	0.538845157	APPROVED	dopamine receptor antagonist	DRD1, DRD4, DRD2, DRD3	1812, 1815, 1813, 1814	SIGNATURE	Homo sapiens	IN_VIVO
prochlorperazine	4917	prochlorperazine inhibits VD1 T cell gamma/delta compared to VD2 T cell gamma/delta	T cell	CL:0000084	T cell gamma/delta	CL:0000084	T cell	CL:0000798	T cell gamma/delta	CL:0000798	GSE3720_VD1_VS_VD2_GAMMADELTA_TCELL	0.013440011		-95.99030213	0.538845157	APPROVED	dopamine receptor antagonist	DRD1, DRD4, DRD2, DRD3	1812, 1815, 1813, 1814	SIGNATURE_UP	Homo sapiens	IN_VIVO
prochlorperazine	4917	prochlorperazine inhibits T helper 1 compared to T CD4+ na茂ve	T cell	CL:0000084	T CD4+ na茂ve	CL:0000084	T cell	CL:0000895	T helper 1	CL:0000545	GSE22886_NAIVE_CD4_TCELL_VS_12H_ACT_TH1		0.013440011	-96.25139873	0.538845157	APPROVED	dopamine receptor antagonist	DRD1, DRD4, DRD2, DRD3	1812, 1815, 1813, 1814	SIGNATURE_DOWN	Homo sapiens	IN_SILICO
prochlorperazine	4917	prochlorperazine inhibits T na茂ve compared to NK cell	T cell	CL:0000084	T na茂ve	CL:0000623	NK cell	CL:0000898	NK cell	CL:0000623	GSE22886_NAIVE_TCELL_VS_NKCELL	0.013191364	0.021695685	-96.30044843	0.538845157	APPROVED	dopamine receptor antagonist	DRD1, DRD4, DRD2, DRD3	1812, 1815, 1813, 1814	SIGNATURE	Homo sapiens	IN_SILICO
prochlorperazine	4917	prochlorperazine inhibits CD25+ T regulatory stimulated with IL4 compared to T CD4+ na茂ve	T cell	CL:0000084	T CD4+ na茂ve	CL:0000084	T cell	CL:0000895	T regulatory	CL:0000815	GSE24634_NAIVE_CD4_TCELL_VS_DAY5_IL4_CONV_TREG		0.013440011	-96.41924655	0.538845157	APPROVED	dopamine receptor antagonist	DRD1, DRD4, DRD2, DRD3	1812, 1815, 1813, 1814	SIGNATURE_DOWN	Homo sapiens	EX_VIVO
prochlorperazine	4917	prochlorperazine inhibits T CD4+ memory compared to PBMC	T cell	CL:0000084	T CD4+ memory	CL:2000001	PBMC	CL:0000897	PBMC	CL:2000001	GSE11057_CD4_EFF_MEM_VS_PBMC	0.131413014	0.013897112	-96.44992526	0.538845157	APPROVED	dopamine receptor antagonist	DRD1, DRD4, DRD2, DRD3	1812, 1815, 1813, 1814	SIGNATURE	Homo sapiens	IN_VIVO
prochlorperazine	4917	prochlorperazine inhibits T cell gamma/delta stimulated with BrHPP and IL2 compared to T cell gamma/delta	T cell	CL:0000084	T cell gamma/delta	CL:0000084	T cell	CL:0000798	T cell gamma/delta	CL:0000798	GSE27291_0H_VS_6H_STIM_GAMMADELTA_TCELL		0.013440011	-96.45654606	0.538845157	APPROVED	dopamine receptor antagonist	DRD1, DRD4, DRD2, DRD3	1812, 1815, 1813, 1814	SIGNATURE_DOWN	Homo sapiens	IN_VITRO
prochlorperazine	4917	prochlorperazine inhibits T helper 1 stimulated with IFNa compared to T CD4+ na茂ve	T cell	CL:0000084	T CD4+ na茂ve	CL:0000084	T cell	CL:0000895	T helper 1	CL:0000545	GSE20198_UNTREATED_VS_IFNA_TREATED_ACT_CD4_TCELL		0.013440011	-96.62439388	0.538845157	APPROVED	dopamine receptor antagonist	DRD1, DRD4, DRD2, DRD3	1812, 1815, 1813, 1814	SIGNATURE_DOWN	Homo sapiens	IN_VITRO
prochlorperazine	4917	prochlorperazine inhibits T CD4+ stimulated with allergen compared to T CD4+ stimulated with allergen in atopic skin	T cell	CL:0000084	T CD4+	CL:0000084	T cell	CL:0000624	T CD4+	CL:0000624	GSE14908_ATOPIC_VS_NONATOPIC_PATIENT_HDM_STIM_CD4_TCELL		0.013440011	-96.73629243	0.538845157	APPROVED	dopamine receptor antagonist	DRD1, DRD4, DRD2, DRD3	1812, 1815, 1813, 1814	SIGNATURE_DOWN	Homo sapiens	PATIENT
prochlorperazine	4917	prochlorperazine inhibits CD25+ T CD4+ effector compared to CD25- T cell	T cell	CL:0000084	T CD4+ effector	CL:0000084	T cell	CL:0001044	T cell	CL:0000084	GSE24634_TEFF_VS_TCONV_DAY5_IN_CULTURE	0.013440011		-97.72472958	0.538845157	APPROVED	dopamine receptor antagonist	DRD1, DRD4, DRD2, DRD3	1812, 1815, 1813, 1814	SIGNATURE_UP	Homo sapiens	EX_VIVO
prochlorperazine	4917	prochlorperazine inhibits T helper 1 compared to T CD4+ memory	T cell	CL:0000084	T CD4+ memory	CL:0000084	T cell	CL:0000897	T helper 1	CL:0000545	GSE3982_EFF_MEMORY_CD4_TCELL_VS_TH1		0.013440011	-97.79932861	0.538845157	APPROVED	dopamine receptor antagonist	DRD1, DRD4, DRD2, DRD3	1812, 1815, 1813, 1814	SIGNATURE_DOWN	Homo sapiens	UNKNOWN
prochlorperazine	4917	prochlorperazine inhibits T cell stimulated with TNF compared to T regulatory stimulated with TNF	T cell	CL:0000084	T cell	CL:0000084	T cell	CL:0000084	T regulatory	CL:0000815	GSE18893_TCONV_VS_TREG_24H_TNF_STIM	0.013440011		-97.85527788	0.538845157	APPROVED	dopamine receptor antagonist	DRD1, DRD4, DRD2, DRD3	1812, 1815, 1813, 1814	SIGNATURE_UP	Homo sapiens	IN_VITRO
prochlorperazine	4917	prochlorperazine inhibits T helper 2 compared to T CD4+ memory	T cell	CL:0000084	T CD4+ memory	CL:0000084	T cell	CL:0000897	T helper 2	CL:0000546	GSE3982_EFF_MEMORY_CD4_TCELL_VS_TH2		0.013440011	-98.00447594	0.538845157	APPROVED	dopamine receptor antagonist	DRD1, DRD4, DRD2, DRD3	1812, 1815, 1813, 1814	SIGNATURE_DOWN	Homo sapiens	UNKNOWN
prochlorperazine	4917	prochlorperazine inhibits T CD4+ in Lupus erythematosus compared to Myeloid in Lupus erythematosus	T cell	CL:0000084	T CD4+		Other	CL:0000624	Myeloid	CL:0000763	GSE10325_LUPUS_CD4_TCELL_VS_LUPUS_MYELOID	0.029115439	0.013897112	-98.16890882	0.538845157	APPROVED	dopamine receptor antagonist	DRD1, DRD4, DRD2, DRD3	1812, 1815, 1813, 1814	SIGNATURE	Homo sapiens	PATIENT
prochlorperazine	4917	prochlorperazine inhibits T regulatory compared to T regulatory in Non-Small Cell Lung Cancer	T cell	CL:0000084	T regulatory	CL:0000084	T cell	CL:0000815	T regulatory	CL:0000815	Treg_Tumor_NSCLC_Adenocarcinoma_vs_Treg_Peripheral_Blood		0.013440011	-98.19097352	0.538845157	APPROVED	dopamine receptor antagonist	DRD1, DRD4, DRD2, DRD3	1812, 1815, 1813, 1814	SIGNATURE_DOWN	Homo sapiens	UNKNOWN
prochlorperazine	4917	prochlorperazine inhibits T CD8+ na茂ve compared to NK cell	T cell	CL:0000084	T CD8+ na茂ve	CL:0000623	NK cell	CL:0000898	NK cell	CL:0000623	GSE22886_NAIVE_CD8_TCELL_VS_NKCELL	0.022162592	0.013897112	-98.20627803	0.538845157	APPROVED	dopamine receptor antagonist	DRD1, DRD4, DRD2, DRD3	1812, 1815, 1813, 1814	SIGNATURE	Homo sapiens	IN_SILICO
prochlorperazine	4917	prochlorperazine inhibits CD25+ T regulatory stimulated with IL4 compared to CD25- T cell stimulated with IL4	T cell	CL:0000084	T regulatory	CL:0000084	T cell	CL:0000815	T cell	CL:0000084	GSE24634_TREG_VS_TCONV_POST_DAY5_IL4_CONVERSION	0.013440011		-98.22827303	0.538845157	APPROVED	dopamine receptor antagonist	DRD1, DRD4, DRD2, DRD3	1812, 1815, 1813, 1814	SIGNATURE_UP	Homo sapiens	EX_VIVO
prochlorperazine	4917	prochlorperazine inhibits T helper compared to T helper stimulated with anti-CD3 and anti-CD28	T cell	CL:0000084	T helper	CL:0000084	T cell	CL:0000492	T helper	CL:0000492	GSE2770_UNTREATED_VS_ACT_CD4_TCELL_48H	0.013440011		-98.34017158	0.538845157	APPROVED	dopamine receptor antagonist	DRD1, DRD4, DRD2, DRD3	1812, 1815, 1813, 1814	SIGNATURE_UP	Homo sapiens	EX_VIVO
prochlorperazine	4917	prochlorperazine inhibits T helper stimulated with IL12, TGFB, anti-CD3 and anti-CD28 compared to T helper stimulated with IL4, TGFB, anti-CD3 and anti-CD28	T cell	CL:0000084	T helper	CL:0000084	T cell	CL:0000492	T helper	CL:0000492	GSE2770_TGFB_AND_IL4_VS_TGFB_AND_IL12_TREATED_ACT_CD4_TCELL_2H		0.013440011	-98.73181649	0.538845157	APPROVED	dopamine receptor antagonist	DRD1, DRD4, DRD2, DRD3	1812, 1815, 1813, 1814	SIGNATURE_DOWN	Homo sapiens	EX_VIVO
prochlorperazine	4917	prochlorperazine inhibits T na茂ve compared to NK cell	T cell	CL:0000084	T na茂ve	CL:0000623	NK cell	CL:0000898	NK cell	CL:0000623	GSE22886_NAIVE_TCELL_VS_NKCELL	0.013440011		-98.91831406	0.538845157	APPROVED	dopamine receptor antagonist	DRD1, DRD4, DRD2, DRD3	1812, 1815, 1813, 1814	SIGNATURE_UP	Homo sapiens	IN_SILICO
prochlorperazine	4917	prochlorperazine inhibits VD2 T cell gamma/delta compared to VD2 T cell gamma/delta stimulated with LPS	T cell	CL:0000084	T cell gamma/delta	CL:0000084	T cell	CL:0000798	T cell gamma/delta	CL:0000798	GSE3720_UNSTIM_VS_LPS_STIM_VD2_GAMMADELTA_TCELL	0.013440011		-99.08616188	0.538845157	APPROVED	dopamine receptor antagonist	DRD1, DRD4, DRD2, DRD3	1812, 1815, 1813, 1814	SIGNATURE_UP	Homo sapiens	IN_VIVO
prochlorperazine	4917	prochlorperazine inhibits VD2 T cell gamma/delta compared to VD2 T cell gamma/delta stimulated with PMA and ionomycin	T cell	CL:0000084	T cell gamma/delta	CL:0000084	T cell	CL:0000798	T cell gamma/delta	CL:0000798	GSE3720_UNSTIM_VS_PMA_STIM_VD2_GAMMADELTA_TCELL	0.013440011		-99.23535994	0.538845157	APPROVED	dopamine receptor antagonist	DRD1, DRD4, DRD2, DRD3	1812, 1815, 1813, 1814	SIGNATURE_UP	Homo sapiens	IN_VIVO
prochlorperazine	4917	prochlorperazine inhibits T na茂ve compared to Neutrophil	T cell	CL:0000084	T na茂ve	CL:0000775	Neutrophil	CL:0000898	Neutrophil	CL:0000775	GSE22886_NAIVE_TCELL_VS_NEUTROPHIL	0.013440011		-99.32860873	0.538845157	APPROVED	dopamine receptor antagonist	DRD1, DRD4, DRD2, DRD3	1812, 1815, 1813, 1814	SIGNATURE_UP	Homo sapiens	IN_SILICO
prochlorperazine	4917	prochlorperazine inhibits T cell compared to T cell	T cell	CL:0000084	T cell	CL:0000084	T cell	CL:0000084	T cell	CL:0000084	GSE22886_UNSTIM_VS_STIM_MEMORY_TCELL		0.013440011	-99.49645655	0.538845157	APPROVED	dopamine receptor antagonist	DRD1, DRD4, DRD2, DRD3	1812, 1815, 1813, 1814	SIGNATURE_DOWN	Homo sapiens	IN_SILICO
prochlorperazine	4917	prochlorperazine inhibits PD-1 (high) T CD8+ compared to PD-1 (low) T CD8+	T cell	CL:0000084	T CD8+	CL:0000084	T cell	CL:0002437	T CD8+	CL:0002437	GSE26495_PD1HIGH_VS_PD1LOW_CD8_TCELL	0.379681676	0.013897112	-99.70104634	0.538845157	APPROVED	dopamine receptor antagonist	DRD1, DRD4, DRD2, DRD3	1812, 1815, 1813, 1814	SIGNATURE	Homo sapiens	IN_VIVO
prochlorperazine	4917	prochlorperazine inhibits CD25+ T regulatory stimulated with IL4 compared to CD25- T cell stimulated with IL4	T cell	CL:0000084	T regulatory	CL:0000084	T cell	CL:0000815	T cell	CL:0000084	GSE24634_TREG_VS_TCONV_POST_DAY3_IL4_CONVERSION	0.013440011		-99.83215218	0.538845157	APPROVED	dopamine receptor antagonist	DRD1, DRD4, DRD2, DRD3	1812, 1815, 1813, 1814	SIGNATURE_UP	Homo sapiens	EX_VIVO
propofol	4943	propofol inhibits IgD+ B B cell compared to B cell	B cell	CL:0000236	B cell	CL:0000236	B cell	CL:0000236	B cell	CL:0000236	GSE12845_IGD_POS_BLOOD_VS_DARKZONE_GC_TONSIL_BCELL	0.075669268		-95.20701231		APPROVED	benzodiazepine receptor agonist	GABRP, GABRG3, GABRG1, GABRB3, GABRB1, SCN4A, GABRA5, GABRA2, GABRA4, GABRA1, GABRA6, GABRA3, SCN2A, GABRQ, GABRB2, GABRE, GABRD, FAAH, GABRG2	2568, 2567, 2565, 2562, 2560, 6329, 2558, 2555, 2557, 2554, 2559, 2556, 6326, 55879, NA, 2564, 2563, 2166, NA	SIGNATURE_UP	Homo sapiens	PATIENT
propofol	4943	propofol inhibits IgD+ B B cell compared to B cell	B cell	CL:0000236	B cell	CL:0000236	B cell	CL:0000236	B cell	CL:0000236	GSE12845_IGD_POS_BLOOD_VS_DARKZONE_GC_TONSIL_BCELL	0.050677979	0.074368038	-95.36621824		APPROVED	benzodiazepine receptor agonist	GABRP, GABRG3, GABRG1, GABRB3, GABRB1, SCN4A, GABRA5, GABRA2, GABRA4, GABRA1, GABRA6, GABRA3, SCN2A, GABRQ, GABRB2, GABRE, GABRD, FAAH, GABRG2	2568, 2567, 2565, 2562, 2560, 6329, 2558, 2555, 2557, 2554, 2559, 2556, 6326, 55879, NA, 2564, 2563, 2166, NA	SIGNATURE	Homo sapiens	PATIENT
propofol	4943	propofol inhibits B cell na茂ve compared to B cell	B cell	CL:0000236	B cell na茂ve	CL:0000236	B cell	CL:0000788	B cell	CL:0000236	GSE12845_NAIVE_VS_PRE_GC_TONSIL_BCELL	0.261777057	0.036057887	-98.31838565		APPROVED	benzodiazepine receptor agonist	GABRP, GABRG3, GABRG1, GABRB3, GABRB1, SCN4A, GABRA5, GABRA2, GABRA4, GABRA1, GABRA6, GABRA3, SCN2A, GABRQ, GABRB2, GABRE, GABRD, FAAH, GABRG2	2568, 2567, 2565, 2562, 2560, 6329, 2558, 2555, 2557, 2554, 2559, 2556, 6326, 55879, NA, 2564, 2563, 2166, NA	SIGNATURE	Homo sapiens	PATIENT
propofol	4943	propofol inhibits B cell compared to B cell in Lupus erythematosus	B cell	CL:0000236	B cell	CL:0000236	B cell	CL:0000236	B cell	CL:0000236	GSE10325_BCELL_VS_LUPUS_BCELL	0.058169747		-98.769116		APPROVED	benzodiazepine receptor agonist	GABRP, GABRG3, GABRG1, GABRB3, GABRB1, SCN4A, GABRA5, GABRA2, GABRA4, GABRA1, GABRA6, GABRA3, SCN2A, GABRQ, GABRB2, GABRE, GABRD, FAAH, GABRG2	2568, 2567, 2565, 2562, 2560, 6329, 2558, 2555, 2557, 2554, 2559, 2556, 6326, 55879, NA, 2564, 2563, 2166, NA	SIGNATURE_UP	Homo sapiens	PATIENT
propofol	4943	propofol inhibits Dendritic cell stimulated with R848 and LPS compared to Dendritic cell	Dendritic cell	CL:0000451	Dendritic cell	CL:0000451	Dendritic cell	CL:0000451	Dendritic cell	CL:0000451	GSE2706_UNSTIM_VS_2H_LPS_AND_R848_DC		0.090722975	-95.07646401		APPROVED	benzodiazepine receptor agonist	GABRP, GABRG3, GABRG1, GABRB3, GABRB1, SCN4A, GABRA5, GABRA2, GABRA4, GABRA1, GABRA6, GABRA3, SCN2A, GABRQ, GABRB2, GABRE, GABRD, FAAH, GABRG2	2568, 2567, 2565, 2562, 2560, 6329, 2558, 2555, 2557, 2554, 2559, 2556, 6326, 55879, NA, 2564, 2563, 2166, NA	SIGNATURE_DOWN	Homo sapiens	EX_VIVO
propofol	4943	propofol inhibits Dendritic cell stimulated with L.major compared to Dendritic cell stimulated with B.malayi	Dendritic cell	CL:0000451	Dendritic cell	CL:0000451	Dendritic cell	CL:0000451	Dendritic cell	CL:0000451	GSE360_L_MAJOR_VS_B_MALAYI_LOW_DOSE_DC	0.078386802	0.50031784	-95.40358744		APPROVED	benzodiazepine receptor agonist	GABRP, GABRG3, GABRG1, GABRB3, GABRB1, SCN4A, GABRA5, GABRA2, GABRA4, GABRA1, GABRA6, GABRA3, SCN2A, GABRQ, GABRB2, GABRE, GABRD, FAAH, GABRG2	2568, 2567, 2565, 2562, 2560, 6329, 2558, 2555, 2557, 2554, 2559, 2556, 6326, 55879, NA, 2564, 2563, 2166, NA	SIGNATURE	Homo sapiens	IN_VITRO
propofol	4943	propofol inhibits Dendritic cell stimulated with RARA agonist compared to Dendritic cell	Dendritic cell	CL:0000451	Dendritic cell	CL:0000451	Dendritic cell	CL:0000451	Dendritic cell	CL:0000451	GSE5679_CTRL_VS_RARA_AGONIST_AM580_TREATED_DC		0.090722975	-96.51249534		APPROVED	benzodiazepine receptor agonist	GABRP, GABRG3, GABRG1, GABRB3, GABRB1, SCN4A, GABRA5, GABRA2, GABRA4, GABRA1, GABRA6, GABRA3, SCN2A, GABRQ, GABRB2, GABRE, GABRD, FAAH, GABRG2	2568, 2567, 2565, 2562, 2560, 6329, 2558, 2555, 2557, 2554, 2559, 2556, 6326, 55879, NA, 2564, 2563, 2166, NA	SIGNATURE_DOWN	Homo sapiens	EX_VIVO
propofol	4943	propofol inhibits Dendritic cell stimulated with IL3 and HIV compared to Dendritic cell stimulated with IL3 and CpG	Dendritic cell	CL:0000451	Dendritic cell	CL:0000451	Dendritic cell	CL:0000451	Dendritic cell	CL:0000451	GSE10147_IL3_AND_HIVP17_VS_IL3_AND_CPG_STIM_PDC	0.126489412		-96.94143976		APPROVED	benzodiazepine receptor agonist	GABRP, GABRG3, GABRG1, GABRB3, GABRB1, SCN4A, GABRA5, GABRA2, GABRA4, GABRA1, GABRA6, GABRA3, SCN2A, GABRQ, GABRB2, GABRE, GABRD, FAAH, GABRG2	2568, 2567, 2565, 2562, 2560, 6329, 2558, 2555, 2557, 2554, 2559, 2556, 6326, 55879, NA, 2564, 2563, 2166, NA	SIGNATURE_UP	Homo sapiens	EX_VIVO
propofol	4943	propofol inhibits immature Dendritic cell compared to mature Dendritic cell stimulated with L.monocytogenes	Dendritic cell	CL:0000451	Dendritic cell	CL:0000451	Dendritic cell	CL:0000451	Dendritic cell	CL:0000451	GSE9946_IMMATURE_VS_LISTERIA_INF_MATURE_DC	0.062041384	0.927049676	-97.53363229		APPROVED	benzodiazepine receptor agonist	GABRP, GABRG3, GABRG1, GABRB3, GABRB1, SCN4A, GABRA5, GABRA2, GABRA4, GABRA1, GABRA6, GABRA3, SCN2A, GABRQ, GABRB2, GABRE, GABRD, FAAH, GABRG2	2568, 2567, 2565, 2562, 2560, 6329, 2558, 2555, 2557, 2554, 2559, 2556, 6326, 55879, NA, 2564, 2563, 2166, NA	SIGNATURE	Homo sapiens	EX_VIVO
propofol	4943	propofol inhibits Dendritic cell stimulated with IL6, TNFa, IL1B and PGE compared to Dendritic cell	Dendritic cell	CL:0000451	Dendritic cell	CL:0000451	Dendritic cell	CL:0000451	Dendritic cell	CL:0000451	GSE7509_UNSTIM_VS_TNFA_IL1B_IL6_PGE_STIM_DC		0.182672981	-98.0231257		APPROVED	benzodiazepine receptor agonist	GABRP, GABRG3, GABRG1, GABRB3, GABRB1, SCN4A, GABRA5, GABRA2, GABRA4, GABRA1, GABRA6, GABRA3, SCN2A, GABRQ, GABRB2, GABRE, GABRD, FAAH, GABRG2	2568, 2567, 2565, 2562, 2560, 6329, 2558, 2555, 2557, 2554, 2559, 2556, 6326, 55879, NA, 2564, 2563, 2166, NA	SIGNATURE_DOWN	Homo sapiens	IN_VITRO
propofol	4943	propofol inhibits Dendritic cell compared to Dendritic cell stimulated with Newcastle virus	Dendritic cell	CL:0000451	Dendritic cell	CL:0000451	Dendritic cell	CL:0000451	Dendritic cell	CL:0000451	GSE18791_UNSTIM_VS_NEWCATSLE_VIRUS_DC_2H	0.086597006		-98.48936964		APPROVED	benzodiazepine receptor agonist	GABRP, GABRG3, GABRG1, GABRB3, GABRB1, SCN4A, GABRA5, GABRA2, GABRA4, GABRA1, GABRA6, GABRA3, SCN2A, GABRQ, GABRB2, GABRE, GABRD, FAAH, GABRG2	2568, 2567, 2565, 2562, 2560, 6329, 2558, 2555, 2557, 2554, 2559, 2556, 6326, 55879, NA, 2564, 2563, 2166, NA	SIGNATURE_UP	Homo sapiens	IN_VITRO
propofol	4943	propofol inhibits Dendritic cell stimulated with R848 compared to Dendritic cell	Dendritic cell	CL:0000451	Dendritic cell	CL:0000451	Dendritic cell	CL:0000451	Dendritic cell	CL:0000451	GSE2706_UNSTIM_VS_2H_R848_DC		0.058169747	-99.49645655		APPROVED	benzodiazepine receptor agonist	GABRP, GABRG3, GABRG1, GABRB3, GABRB1, SCN4A, GABRA5, GABRA2, GABRA4, GABRA1, GABRA6, GABRA3, SCN2A, GABRQ, GABRB2, GABRE, GABRD, FAAH, GABRG2	2568, 2567, 2565, 2562, 2560, 6329, 2558, 2555, 2557, 2554, 2559, 2556, 6326, 55879, NA, 2564, 2563, 2166, NA	SIGNATURE_DOWN	Homo sapiens	EX_VIVO
propofol	4943	propofol inhibits immature Dendritic cell compared to mature Dendritic cell stimulated with L.monocytogenes	Dendritic cell	CL:0000451	Dendritic cell	CL:0000451	Dendritic cell	CL:0000451	Dendritic cell	CL:0000451	GSE9946_IMMATURE_VS_LISTERIA_INF_MATURE_DC	0.075561213		-99.66430436		APPROVED	benzodiazepine receptor agonist	GABRP, GABRG3, GABRG1, GABRB3, GABRB1, SCN4A, GABRA5, GABRA2, GABRA4, GABRA1, GABRA6, GABRA3, SCN2A, GABRQ, GABRB2, GABRE, GABRD, FAAH, GABRG2	2568, 2567, 2565, 2562, 2560, 6329, 2558, 2555, 2557, 2554, 2559, 2556, 6326, 55879, NA, 2564, 2563, 2166, NA	SIGNATURE_UP	Homo sapiens	EX_VIVO
propofol	4943	propofol inhibits Macrophage stimulated with L.major compared to Macrophage stimulated with T.gondii	Macrophage	CL:0000235	Macrophage	CL:0000235	Macrophage	CL:0000235	Macrophage	CL:0000235	GSE360_L_MAJOR_VS_T_GONDII_MAC	0.075669268		-96.40059679		APPROVED	benzodiazepine receptor agonist	GABRP, GABRG3, GABRG1, GABRB3, GABRB1, SCN4A, GABRA5, GABRA2, GABRA4, GABRA1, GABRA6, GABRA3, SCN2A, GABRQ, GABRB2, GABRE, GABRD, FAAH, GABRG2	2568, 2567, 2565, 2562, 2560, 6329, 2558, 2555, 2557, 2554, 2559, 2556, 6326, 55879, NA, 2564, 2563, 2166, NA	SIGNATURE_UP	Homo sapiens	IN_VITRO
propofol	4943	propofol inhibits Macrophage stimulated with IL10 compared to Macrophage stimulated with IL4	Macrophage	CL:0000235	Macrophage	CL:0000235	Macrophage	CL:0000235	Macrophage	CL:0000235	GSE85260_Macrophage_IL10_vs_Macrophage_IL4	0.196912757		-97.68743006		APPROVED	benzodiazepine receptor agonist	GABRP, GABRG3, GABRG1, GABRB3, GABRB1, SCN4A, GABRA5, GABRA2, GABRA4, GABRA1, GABRA6, GABRA3, SCN2A, GABRQ, GABRB2, GABRE, GABRD, FAAH, GABRG2	2568, 2567, 2565, 2562, 2560, 6329, 2558, 2555, 2557, 2554, 2559, 2556, 6326, 55879, NA, 2564, 2563, 2166, NA	SIGNATURE_UP	Homo sapiens	UNKNOWN
propofol	4943	propofol inhibits Monocyte stimulated with anti-TREM1 compared to Monocyte stimulated with LPS (low)	Monocyte	CL:0000576	Monocyte	CL:0000576	Monocyte	CL:0000576	Monocyte	CL:0000576	GSE9988_ANTI_TREM1_VS_LOW_LPS_MONOCYTE	0.058169747		-95.46810891		APPROVED	benzodiazepine receptor agonist	GABRP, GABRG3, GABRG1, GABRB3, GABRB1, SCN4A, GABRA5, GABRA2, GABRA4, GABRA1, GABRA6, GABRA3, SCN2A, GABRQ, GABRB2, GABRE, GABRD, FAAH, GABRG2	2568, 2567, 2565, 2562, 2560, 6329, 2558, 2555, 2557, 2554, 2559, 2556, 6326, 55879, NA, 2564, 2563, 2166, NA	SIGNATURE_UP	Homo sapiens	EX_VIVO
propofol	4943	propofol inhibits Monocyte stimulated with LPS compared to Monocyte stimulated with IgG	Monocyte	CL:0000576	Monocyte	CL:0000576	Monocyte	CL:0000576	Monocyte	CL:0000576	GSE9988_LPS_VS_CTRL_TREATED_MONOCYTE	0.209758965	0.042704626	-96.22571001		APPROVED	benzodiazepine receptor agonist	GABRP, GABRG3, GABRG1, GABRB3, GABRB1, SCN4A, GABRA5, GABRA2, GABRA4, GABRA1, GABRA6, GABRA3, SCN2A, GABRQ, GABRB2, GABRE, GABRD, FAAH, GABRG2	2568, 2567, 2565, 2562, 2560, 6329, 2558, 2555, 2557, 2554, 2559, 2556, 6326, 55879, NA, 2564, 2563, 2166, NA	SIGNATURE	Homo sapiens	EX_VIVO
propofol	4943	propofol inhibits Monocyte stimulated with anti-TREM1 compared to Monocyte stimulated with LPS (low)	Monocyte	CL:0000576	Monocyte	CL:0000576	Monocyte	CL:0000576	Monocyte	CL:0000576	GSE9988_ANTI_TREM1_VS_LOW_LPS_MONOCYTE	0.050677979	0.675687262	-97.04783259		APPROVED	benzodiazepine receptor agonist	GABRP, GABRG3, GABRG1, GABRB3, GABRB1, SCN4A, GABRA5, GABRA2, GABRA4, GABRA1, GABRA6, GABRA3, SCN2A, GABRQ, GABRB2, GABRE, GABRD, FAAH, GABRG2	2568, 2567, 2565, 2562, 2560, 6329, 2558, 2555, 2557, 2554, 2559, 2556, 6326, 55879, NA, 2564, 2563, 2166, NA	SIGNATURE	Homo sapiens	EX_VIVO
propofol	4943	propofol inhibits Monocyte stimulated with LPS (low dose) compared to Monocyte stimulated with IgG	Monocyte	CL:0000576	Monocyte	CL:0000576	Monocyte	CL:0000576	Monocyte	CL:0000576	GSE9988_LOW_LPS_VS_CTRL_TREATED_MONOCYTE	0.050677979	0.042704626	-98.16890882		APPROVED	benzodiazepine receptor agonist	GABRP, GABRG3, GABRG1, GABRB3, GABRB1, SCN4A, GABRA5, GABRA2, GABRA4, GABRA1, GABRA6, GABRA3, SCN2A, GABRQ, GABRB2, GABRE, GABRD, FAAH, GABRG2	2568, 2567, 2565, 2562, 2560, 6329, 2558, 2555, 2557, 2554, 2559, 2556, 6326, 55879, NA, 2564, 2563, 2166, NA	SIGNATURE	Homo sapiens	EX_VIVO
propofol	4943	propofol inhibits Monocyte stimulated with anti-TREM1 compared to Monocyte stimulated with LPS	Monocyte	CL:0000576	Monocyte	CL:0000576	Monocyte	CL:0000576	Monocyte	CL:0000576	GSE9988_ANTI_TREM1_VS_LPS_MONOCYTE	0.050677979	0.655779486	-98.39312407		APPROVED	benzodiazepine receptor agonist	GABRP, GABRG3, GABRG1, GABRB3, GABRB1, SCN4A, GABRA5, GABRA2, GABRA4, GABRA1, GABRA6, GABRA3, SCN2A, GABRQ, GABRB2, GABRE, GABRD, FAAH, GABRG2	2568, 2567, 2565, 2562, 2560, 6329, 2558, 2555, 2557, 2554, 2559, 2556, 6326, 55879, NA, 2564, 2563, 2166, NA	SIGNATURE	Homo sapiens	EX_VIVO
propofol	4943	propofol inhibits CD16- Monocyte compared to CD16+ Monocyte	Monocyte	CL:0000576	Monocyte	CL:0000576	Monocyte	CL:0000576	Monocyte	CL:0000576	GSE34515_CD16_NEG_VS_POS_MONOCYTE	0.130065269	0.311753741	-98.50523169		APPROVED	benzodiazepine receptor agonist	GABRP, GABRG3, GABRG1, GABRB3, GABRB1, SCN4A, GABRA5, GABRA2, GABRA4, GABRA1, GABRA6, GABRA3, SCN2A, GABRQ, GABRB2, GABRE, GABRD, FAAH, GABRG2	2568, 2567, 2565, 2562, 2560, 6329, 2558, 2555, 2557, 2554, 2559, 2556, 6326, 55879, NA, 2564, 2563, 2166, NA	SIGNATURE	Homo sapiens	IN_VITRO
propofol	4943	propofol inhibits Monocyte in Breast invasive carcinom compared to Monocyte in Breast invasive carcinom	Monocyte	CL:0000576	Monocyte	CL:0000576	Monocyte	CL:0000576	Monocyte	CL:0000576	Casseta_TumorEducatedMonocyte_vs_Monocyte_BRCA		0.058169747	-99.60835509		APPROVED	benzodiazepine receptor agonist	GABRP, GABRG3, GABRG1, GABRB3, GABRB1, SCN4A, GABRA5, GABRA2, GABRA4, GABRA1, GABRA6, GABRA3, SCN2A, GABRQ, GABRB2, GABRE, GABRD, FAAH, GABRG2	2568, 2567, 2565, 2562, 2560, 6329, 2558, 2555, 2557, 2554, 2559, 2556, 6326, 55879, NA, 2564, 2563, 2166, NA	SIGNATURE_DOWN	Homo sapiens	PATIENT
propofol	4943	propofol inhibits Monocyte compared to Monocyte in Endometrial carcinoma	Monocyte	CL:0000576	Monocyte	CL:0000576	Monocyte	CL:0000576	Monocyte	CL:0000576	Casseta_NonClassicalActivated_Monocyte_ENCA_vs_healthy_monocyte		0.058169747	-99.62700485		APPROVED	benzodiazepine receptor agonist	GABRP, GABRG3, GABRG1, GABRB3, GABRB1, SCN4A, GABRA5, GABRA2, GABRA4, GABRA1, GABRA6, GABRA3, SCN2A, GABRQ, GABRB2, GABRE, GABRD, FAAH, GABRG2	2568, 2567, 2565, 2562, 2560, 6329, 2558, 2555, 2557, 2554, 2559, 2556, 6326, 55879, NA, 2564, 2563, 2166, NA	SIGNATURE_DOWN	Homo sapiens	PATIENT
propofol	4943	propofol inhibits Monocyte in Arthritis	Monocyte	CL:0000576	Monocyte	CL:0000576	Monocyte	CL:0000576	Monocyte	CL:0000576	GSE57383_RA_GPL13158_CD14+_Cells	0.273351566		-99.88810145		APPROVED	benzodiazepine receptor agonist	GABRP, GABRG3, GABRG1, GABRB3, GABRB1, SCN4A, GABRA5, GABRA2, GABRA4, GABRA1, GABRA6, GABRA3, SCN2A, GABRQ, GABRB2, GABRE, GABRD, FAAH, GABRG2	2568, 2567, 2565, 2562, 2560, 6329, 2558, 2555, 2557, 2554, 2559, 2556, 6326, 55879, NA, 2564, 2563, 2166, NA	GENESET	Homo sapiens	PATIENT
propofol	4943	propofol inhibits Monocyte compared to Monocyte in Breast invasive carcinom	Monocyte	CL:0000576	Monocyte	CL:0000576	Monocyte	CL:0000576	Monocyte	CL:0000576	Casseta_NonClassicalActivated_Monocyte_BRCA_vs_healthy_monocyte		0.058169747	-99.96270048		APPROVED	benzodiazepine receptor agonist	GABRP, GABRG3, GABRG1, GABRB3, GABRB1, SCN4A, GABRA5, GABRA2, GABRA4, GABRA1, GABRA6, GABRA3, SCN2A, GABRQ, GABRB2, GABRE, GABRD, FAAH, GABRG2	2568, 2567, 2565, 2562, 2560, 6329, 2558, 2555, 2557, 2554, 2559, 2556, 6326, 55879, NA, 2564, 2563, 2166, NA	SIGNATURE_DOWN	Homo sapiens	PATIENT
propofol	4943	propofol inhibits Neutrophil stimulated with F.tularensis compared to Neutrophil	Neutrophil	CL:0000775	Neutrophil	CL:0000775	Neutrophil	CL:0000775	Neutrophil	CL:0000775	GSE37416_CTRL_VS_0H_F_TULARENSIS_LVS_NEUTROPHIL		0.105330508	-96.77359194		APPROVED	benzodiazepine receptor agonist	GABRP, GABRG3, GABRG1, GABRB3, GABRB1, SCN4A, GABRA5, GABRA2, GABRA4, GABRA1, GABRA6, GABRA3, SCN2A, GABRQ, GABRB2, GABRE, GABRD, FAAH, GABRG2	2568, 2567, 2565, 2562, 2560, 6329, 2558, 2555, 2557, 2554, 2559, 2556, 6326, 55879, NA, 2564, 2563, 2166, NA	SIGNATURE_DOWN	Homo sapiens	IN_VITRO
propofol	4943	propofol inhibits PBMC stimulated with YF17D Vaccine compared to PBMC	PBMC	CL:2000001	PBMC	CL:2000001	PBMC	CL:2000001	PBMC	CL:2000001	GSE13485_CTRL_VS_DAY21_YF17D_VACCINE_PBMC		0.106092503	-96.5311451		APPROVED	benzodiazepine receptor agonist	GABRP, GABRG3, GABRG1, GABRB3, GABRB1, SCN4A, GABRA5, GABRA2, GABRA4, GABRA1, GABRA6, GABRA3, SCN2A, GABRQ, GABRB2, GABRE, GABRD, FAAH, GABRG2	2568, 2567, 2565, 2562, 2560, 6329, 2558, 2555, 2557, 2554, 2559, 2556, 6326, 55879, NA, 2564, 2563, 2166, NA	SIGNATURE_DOWN	Homo sapiens	PATIENT
propofol	4943	propofol inhibits PBMC compared to PBMC in Lupus erythematosus	PBMC	CL:2000001	PBMC	CL:2000001	PBMC	CL:2000001	PBMC	CL:2000001	GSE11907_SLE_GPL96_PBMCs		0.058169747	-97.538232		APPROVED	benzodiazepine receptor agonist	GABRP, GABRG3, GABRG1, GABRB3, GABRB1, SCN4A, GABRA5, GABRA2, GABRA4, GABRA1, GABRA6, GABRA3, SCN2A, GABRQ, GABRB2, GABRE, GABRD, FAAH, GABRG2	2568, 2567, 2565, 2562, 2560, 6329, 2558, 2555, 2557, 2554, 2559, 2556, 6326, 55879, NA, 2564, 2563, 2166, NA	SIGNATURE_DOWN	Homo sapiens	PATIENT
propofol	4943	propofol inhibits Myeloid compared to Myeloid in Lupus erythematosus	PBMC	CL:2000001	Myeloid		Other	CL:0000763	Myeloid	CL:0000763	GSE10325_MYELOID_VS_LUPUS_MYELOID	0.058169747		-97.79932861		APPROVED	benzodiazepine receptor agonist	GABRP, GABRG3, GABRG1, GABRB3, GABRB1, SCN4A, GABRA5, GABRA2, GABRA4, GABRA1, GABRA6, GABRA3, SCN2A, GABRQ, GABRB2, GABRE, GABRD, FAAH, GABRG2	2568, 2567, 2565, 2562, 2560, 6329, 2558, 2555, 2557, 2554, 2559, 2556, 6326, 55879, NA, 2564, 2563, 2166, NA	SIGNATURE_UP	Homo sapiens	PATIENT
propofol	4943	propofol inhibits PBMC compared to PBMC in Arthritis	PBMC	CL:2000001	PBMC	CL:2000001	PBMC	CL:2000001	PBMC	CL:2000001	GSE90081_RA_GPL11154_PBMCs		0.075561213	-97.94852667		APPROVED	benzodiazepine receptor agonist	GABRP, GABRG3, GABRG1, GABRB3, GABRB1, SCN4A, GABRA5, GABRA2, GABRA4, GABRA1, GABRA6, GABRA3, SCN2A, GABRQ, GABRB2, GABRE, GABRD, FAAH, GABRG2	2568, 2567, 2565, 2562, 2560, 6329, 2558, 2555, 2557, 2554, 2559, 2556, 6326, 55879, NA, 2564, 2563, 2166, NA	SIGNATURE_DOWN	Homo sapiens	PATIENT
propofol	4943	propofol inhibits PBMC in Organ Transplant compared to PBMC stimulated with immunosuppressive therapy in Organ Transplant	PBMC	CL:2000001	PBMC	CL:2000001	PBMC	CL:2000001	PBMC	CL:2000001	GSE22229_UNTREATED_VS_IMMUNOSUPP_THERAPY_RENAL_TRANSPLANT_PATIENT_PBMC	0.075561213		-98.04177546		APPROVED	benzodiazepine receptor agonist	GABRP, GABRG3, GABRG1, GABRB3, GABRB1, SCN4A, GABRA5, GABRA2, GABRA4, GABRA1, GABRA6, GABRA3, SCN2A, GABRQ, GABRB2, GABRE, GABRD, FAAH, GABRG2	2568, 2567, 2565, 2562, 2560, 6329, 2558, 2555, 2557, 2554, 2559, 2556, 6326, 55879, NA, 2564, 2563, 2166, NA	SIGNATURE_UP	Homo sapiens	PATIENT
propofol	4943	propofol inhibits PBMC compared to PBMC stimulated with TIV Influenza vaccine	PBMC	CL:2000001	PBMC	CL:2000001	PBMC	CL:2000001	PBMC	CL:2000001	GSE29617_CTRL_VS_TIV_FLU_VACCINE_PBMC_2008	0.440981506	0.036057887	-98.69207773		APPROVED	benzodiazepine receptor agonist	GABRP, GABRG3, GABRG1, GABRB3, GABRB1, SCN4A, GABRA5, GABRA2, GABRA4, GABRA1, GABRA6, GABRA3, SCN2A, GABRQ, GABRB2, GABRE, GABRD, FAAH, GABRG2	2568, 2567, 2565, 2562, 2560, 6329, 2558, 2555, 2557, 2554, 2559, 2556, 6326, 55879, NA, 2564, 2563, 2166, NA	SIGNATURE	Homo sapiens	UNKNOWN
propofol	4943	propofol inhibits PBMC compared to PBMC in Diabetes	PBMC	CL:2000001	PBMC	CL:2000001	PBMC	CL:2000001	PBMC	CL:2000001	GSE11907_T1D_GPL96_PBMCs		0.058169747	-98.80641552		APPROVED	benzodiazepine receptor agonist	GABRP, GABRG3, GABRG1, GABRB3, GABRB1, SCN4A, GABRA5, GABRA2, GABRA4, GABRA1, GABRA6, GABRA3, SCN2A, GABRQ, GABRB2, GABRE, GABRD, FAAH, GABRG2	2568, 2567, 2565, 2562, 2560, 6329, 2558, 2555, 2557, 2554, 2559, 2556, 6326, 55879, NA, 2564, 2563, 2166, NA	SIGNATURE_DOWN	Homo sapiens	PATIENT
propofol	4943	propofol inhibits PBMC stimulated with IL12 compared to PBMC	PBMC	CL:2000001	PBMC	CL:2000001	PBMC	CL:2000001	PBMC	CL:2000001	GSE12839_CTRL_VS_IL12_TREATED_PBMC		0.075561213	-99.68295412		APPROVED	benzodiazepine receptor agonist	GABRP, GABRG3, GABRG1, GABRB3, GABRB1, SCN4A, GABRA5, GABRA2, GABRA4, GABRA1, GABRA6, GABRA3, SCN2A, GABRQ, GABRB2, GABRE, GABRD, FAAH, GABRG2	2568, 2567, 2565, 2562, 2560, 6329, 2558, 2555, 2557, 2554, 2559, 2556, 6326, 55879, NA, 2564, 2563, 2166, NA	SIGNATURE_DOWN	Homo sapiens	EX_VIVO
propofol	4943	propofol inhibits T helper stimulated with IL4, TGFB, anti-CD3 and anti-CD28 compared to T helper stimulated with CD28 and anti-CD3	T cell	CL:0000084	T helper	CL:0000084	T cell	CL:0000492	T helper	CL:0000492	GSE2770_TGFB_AND_IL4_ACT_VS_ACT_CD4_TCELL_6H	0.267807104	0.056284705	-95.10463378		APPROVED	benzodiazepine receptor agonist	GABRP, GABRG3, GABRG1, GABRB3, GABRB1, SCN4A, GABRA5, GABRA2, GABRA4, GABRA1, GABRA6, GABRA3, SCN2A, GABRQ, GABRB2, GABRE, GABRD, FAAH, GABRG2	2568, 2567, 2565, 2562, 2560, 6329, 2558, 2555, 2557, 2554, 2559, 2556, 6326, 55879, NA, 2564, 2563, 2166, NA	SIGNATURE	Homo sapiens	EX_VIVO
propofol	4943	propofol inhibits T CD4+ stimulated with IL15 in Cuteaneous T-cell lymphoma compared to T CD4+ in Cuteaneous T-cell lymphoma	T cell	CL:0000084	T CD4+	CL:0000084	T cell	CL:0000624	T CD4+	CL:0000624	GSE8685_IL15_ACT_IL2_STARVED_VS_IL21_ACT_IL2_STARVED_CD4_TCELL	0.296166151	0.320628594	-95.21674141		APPROVED	benzodiazepine receptor agonist	GABRP, GABRG3, GABRG1, GABRB3, GABRB1, SCN4A, GABRA5, GABRA2, GABRA4, GABRA1, GABRA6, GABRA3, SCN2A, GABRQ, GABRB2, GABRE, GABRD, FAAH, GABRG2	2568, 2567, 2565, 2562, 2560, 6329, 2558, 2555, 2557, 2554, 2559, 2556, 6326, 55879, NA, 2564, 2563, 2166, NA	SIGNATURE	Homo sapiens	IN_VITRO
propofol	4943	propofol inhibits T helper stimulated with IL12, TGFB, anti-CD3 and anti-CD28 compared to T helper stimulated with anti-CD3 and anti-CD28	T cell	CL:0000084	T helper	CL:0000084	T cell	CL:0000492	T helper	CL:0000492	GSE2770_IL12_AND_TGFB_ACT_VS_ACT_CD4_TCELL_48H	0.71589506	0.042704626	-95.51569507		APPROVED	benzodiazepine receptor agonist	GABRP, GABRG3, GABRG1, GABRB3, GABRB1, SCN4A, GABRA5, GABRA2, GABRA4, GABRA1, GABRA6, GABRA3, SCN2A, GABRQ, GABRB2, GABRE, GABRD, FAAH, GABRG2	2568, 2567, 2565, 2562, 2560, 6329, 2558, 2555, 2557, 2554, 2559, 2556, 6326, 55879, NA, 2564, 2563, 2166, NA	SIGNATURE	Homo sapiens	EX_VIVO
propofol	4943	propofol inhibits T CD4+ memory compared to PBMC	T cell	CL:0000084	T CD4+ memory	CL:2000001	PBMC	CL:0000897	PBMC	CL:2000001	GSE11057_CD4_CENT_MEM_VS_PBMC	0.058169747		-95.78515479		APPROVED	benzodiazepine receptor agonist	GABRP, GABRG3, GABRG1, GABRB3, GABRB1, SCN4A, GABRA5, GABRA2, GABRA4, GABRA1, GABRA6, GABRA3, SCN2A, GABRQ, GABRB2, GABRE, GABRD, FAAH, GABRG2	2568, 2567, 2565, 2562, 2560, 6329, 2558, 2555, 2557, 2554, 2559, 2556, 6326, 55879, NA, 2564, 2563, 2166, NA	SIGNATURE_UP	Homo sapiens	IN_VIVO
propofol	4943	propofol inhibits T CD4+ na茂ve compared to T CD4+ memory	T cell	CL:0000084	T CD4+ na茂ve	CL:0000084	T cell	CL:0000895	T CD4+ memory	CL:0000897	GSE26928_NAIVE_VS_CENT_MEMORY_CD4_TCELL	0.382293958	0.301363818	-95.85201794		APPROVED	benzodiazepine receptor agonist	GABRP, GABRG3, GABRG1, GABRB3, GABRB1, SCN4A, GABRA5, GABRA2, GABRA4, GABRA1, GABRA6, GABRA3, SCN2A, GABRQ, GABRB2, GABRE, GABRD, FAAH, GABRG2	2568, 2567, 2565, 2562, 2560, 6329, 2558, 2555, 2557, 2554, 2559, 2556, 6326, 55879, NA, 2564, 2563, 2166, NA	SIGNATURE	Homo sapiens	EX_VIVO
propofol	4943	propofol inhibits T CD4+ stimulated with TGFB compared to T CD4+	T cell	CL:0000084	T CD4+	CL:0000084	T cell	CL:0000624	T CD4+	CL:0000624	GSE22025_UNTREATED_VS_TGFB1_TREATED_CD4_TCELL		0.058169747	-96.28869825		APPROVED	benzodiazepine receptor agonist	GABRP, GABRG3, GABRG1, GABRB3, GABRB1, SCN4A, GABRA5, GABRA2, GABRA4, GABRA1, GABRA6, GABRA3, SCN2A, GABRQ, GABRB2, GABRE, GABRD, FAAH, GABRG2	2568, 2567, 2565, 2562, 2560, 6329, 2558, 2555, 2557, 2554, 2559, 2556, 6326, 55879, NA, 2564, 2563, 2166, NA	SIGNATURE_DOWN	Homo sapiens	IN_VITRO
propofol	4943	propofol inhibits T regulatory in Colorectal cancer compared to T regulatory	T cell	CL:0000084	T regulatory	CL:0000084	T cell	CL:0000815	T regulatory	CL:0000815	Treg_Tumor_CRC_Adenocarcinoma_vs_Treg_Healthy_Tissue_CRC_Adenocarcinoma	0.075669268		-96.54979485		APPROVED	benzodiazepine receptor agonist	GABRP, GABRG3, GABRG1, GABRB3, GABRB1, SCN4A, GABRA5, GABRA2, GABRA4, GABRA1, GABRA6, GABRA3, SCN2A, GABRQ, GABRB2, GABRE, GABRD, FAAH, GABRG2	2568, 2567, 2565, 2562, 2560, 6329, 2558, 2555, 2557, 2554, 2559, 2556, 6326, 55879, NA, 2564, 2563, 2166, NA	SIGNATURE_UP	Homo sapiens	UNKNOWN
propofol	4943	propofol inhibits Va24- NK na茂ve compared to T CD4+ na茂ve	T cell	CL:0000084	T CD4+ na茂ve	CL:0000623	NK cell	CL:0000895	NK na茂ve	CL:0000914	GSE28726_NAIVE_CD4_TCELL_VS_NAIVE_VA24NEG_NKTCELL		0.058169747	-96.60574413		APPROVED	benzodiazepine receptor agonist	GABRP, GABRG3, GABRG1, GABRB3, GABRB1, SCN4A, GABRA5, GABRA2, GABRA4, GABRA1, GABRA6, GABRA3, SCN2A, GABRQ, GABRB2, GABRE, GABRD, FAAH, GABRG2	2568, 2567, 2565, 2562, 2560, 6329, 2558, 2555, 2557, 2554, 2559, 2556, 6326, 55879, NA, 2564, 2563, 2166, NA	SIGNATURE_DOWN	Homo sapiens	IN_VITRO
propofol	4943	propofol inhibits T CD4+ na茂ve compared to T helper 2	T cell	CL:0000084	T CD4+ na茂ve	CL:0000084	T cell	CL:0000895	T helper 2	CL:0000546	GSE22886_NAIVE_CD4_TCELL_VS_12H_ACT_TH2	0.058169747		-96.84819097		APPROVED	benzodiazepine receptor agonist	GABRP, GABRG3, GABRG1, GABRB3, GABRB1, SCN4A, GABRA5, GABRA2, GABRA4, GABRA1, GABRA6, GABRA3, SCN2A, GABRQ, GABRB2, GABRE, GABRD, FAAH, GABRG2	2568, 2567, 2565, 2562, 2560, 6329, 2558, 2555, 2557, 2554, 2559, 2556, 6326, 55879, NA, 2564, 2563, 2166, NA	SIGNATURE_UP	Homo sapiens	IN_SILICO
propofol	4943	propofol inhibits resting T CD4+ compared to T CD4+ stimulated with anti-CD3 and anti-CD28	T cell	CL:0000084	T CD4+	CL:0000084	T cell	CL:0000624	T CD4+	CL:0000624	GSE13887_RESTING_VS_ACT_CD4_TCELL	0.2277954		-96.90414025		APPROVED	benzodiazepine receptor agonist	GABRP, GABRG3, GABRG1, GABRB3, GABRB1, SCN4A, GABRA5, GABRA2, GABRA4, GABRA1, GABRA6, GABRA3, SCN2A, GABRQ, GABRB2, GABRE, GABRD, FAAH, GABRG2	2568, 2567, 2565, 2562, 2560, 6329, 2558, 2555, 2557, 2554, 2559, 2556, 6326, 55879, NA, 2564, 2563, 2166, NA	SIGNATURE_UP	Homo sapiens	PATIENT
propofol	4943	propofol inhibits T CD4+ compared to T CD4+ stimulated with IL4 and anti-IL12	T cell	CL:0000084	T CD4+	CL:0000084	T cell	CL:0000624	T CD4+	CL:0000624	GSE17974_CTRL_VS_ACT_IL4_AND_ANTI_IL12_0.5H_CD4_TCELL	0.126489412		-97.09063782		APPROVED	benzodiazepine receptor agonist	GABRP, GABRG3, GABRG1, GABRB3, GABRB1, SCN4A, GABRA5, GABRA2, GABRA4, GABRA1, GABRA6, GABRA3, SCN2A, GABRQ, GABRB2, GABRE, GABRD, FAAH, GABRG2	2568, 2567, 2565, 2562, 2560, 6329, 2558, 2555, 2557, 2554, 2559, 2556, 6326, 55879, NA, 2564, 2563, 2166, NA	SIGNATURE_UP	Homo sapiens	EX_VIVO
propofol	4943	propofol inhibits T CD4+ na茂ve compared to T helper 2	T cell	CL:0000084	T CD4+ na茂ve	CL:0000084	T cell	CL:0000895	T helper 2	CL:0000546	GSE22886_NAIVE_CD4_TCELL_VS_48H_ACT_TH2	0.500372575	0.036057887	-97.30941704		APPROVED	benzodiazepine receptor agonist	GABRP, GABRG3, GABRG1, GABRB3, GABRB1, SCN4A, GABRA5, GABRA2, GABRA4, GABRA1, GABRA6, GABRA3, SCN2A, GABRQ, GABRB2, GABRE, GABRD, FAAH, GABRG2	2568, 2567, 2565, 2562, 2560, 6329, 2558, 2555, 2557, 2554, 2559, 2556, 6326, 55879, NA, 2564, 2563, 2166, NA	SIGNATURE	Homo sapiens	IN_SILICO
propofol	4943	propofol inhibits T CD8+ stimulated with Overexpression (KLBR1) compared to T CD8+	T cell	CL:0000084	T CD8+	CL:0000084	T cell	CL:0002437	T CD8+	CL:0002437	GSE33425_CD161_HIGH_VS_INT_CD8_TCELL	0.850634934	0.036057887	-97.42152466		APPROVED	benzodiazepine receptor agonist	GABRP, GABRG3, GABRG1, GABRB3, GABRB1, SCN4A, GABRA5, GABRA2, GABRA4, GABRA1, GABRA6, GABRA3, SCN2A, GABRQ, GABRB2, GABRE, GABRD, FAAH, GABRG2	2568, 2567, 2565, 2562, 2560, 6329, 2558, 2555, 2557, 2554, 2559, 2556, 6326, 55879, NA, 2564, 2563, 2166, NA	SIGNATURE	Homo sapiens	IN_VIVO
propofol	4943	propofol inhibits T CD4+ stimulated with cultured (0 hours) compared to T CD4+ stimulated with cultured (30 min)	T cell	CL:0000084	T CD4+	CL:0000084	T cell	CL:0000624	T CD4+	CL:0000624	GSE17974_0H_VS_0.5H_IN_VITRO_ACT_CD4_TCELL	0.058169747		-98.22827303		APPROVED	benzodiazepine receptor agonist	GABRP, GABRG3, GABRG1, GABRB3, GABRB1, SCN4A, GABRA5, GABRA2, GABRA4, GABRA1, GABRA6, GABRA3, SCN2A, GABRQ, GABRB2, GABRE, GABRD, FAAH, GABRG2	2568, 2567, 2565, 2562, 2560, 6329, 2558, 2555, 2557, 2554, 2559, 2556, 6326, 55879, NA, 2564, 2563, 2166, NA	SIGNATURE_UP	Homo sapiens	EX_VIVO
propofol	4943	propofol inhibits T CD4+ na茂ve compared to T helper stimulated with IL4, anti-CD3 and anti-CD28	T cell	CL:0000084	T CD4+ na茂ve	CL:0000084	T cell	CL:0000895	T helper	CL:0000492	GSE2770_UNTREATED_VS_IL4_TREATED_ACT_CD4_TCELL_48H	0.229028624	0.042704626	-99.36472347		APPROVED	benzodiazepine receptor agonist	GABRP, GABRG3, GABRG1, GABRB3, GABRB1, SCN4A, GABRA5, GABRA2, GABRA4, GABRA1, GABRA6, GABRA3, SCN2A, GABRQ, GABRB2, GABRE, GABRD, FAAH, GABRG2	2568, 2567, 2565, 2562, 2560, 6329, 2558, 2555, 2557, 2554, 2559, 2556, 6326, 55879, NA, 2564, 2563, 2166, NA	SIGNATURE	Homo sapiens	EX_VIVO
propofol	4943	propofol inhibits T CD4+ compared to T CD4+ stimulated with IL4 and anti-IL12	T cell	CL:0000084	T CD4+	CL:0000084	T cell	CL:0000624	T CD4+	CL:0000624	GSE17974_CTRL_VS_ACT_IL4_AND_ANTI_IL12_2H_CD4_TCELL	0.196388655	0.036057887	-99.70104634		APPROVED	benzodiazepine receptor agonist	GABRP, GABRG3, GABRG1, GABRB3, GABRB1, SCN4A, GABRA5, GABRA2, GABRA4, GABRA1, GABRA6, GABRA3, SCN2A, GABRQ, GABRB2, GABRE, GABRD, FAAH, GABRG2	2568, 2567, 2565, 2562, 2560, 6329, 2558, 2555, 2557, 2554, 2559, 2556, 6326, 55879, NA, 2564, 2563, 2166, NA	SIGNATURE	Homo sapiens	EX_VIVO
benfluorex	2318	benfluorex inhibits B cell naïve compared to B cell	B cell	CL:0000236	B cell naïve	CL:0000236	B cell	CL:0000788	B cell	CL:0000236	GSE12845_NAIVE_VS_PRE_GC_TONSIL_BCELL	0.149119166	0.014457831	-98.5426009		WITHDRAWN	gluconeogenesis inhibitor	HMGCR	3156	SIGNATURE	Homo sapiens	PATIENT
benfluorex	2318	benfluorex inhibits Dendritic cell stimulated with R848 and LPS compared to Dendritic cell stimulated with LPS	Dendritic cell	CL:0000451	Dendritic cell	CL:0000451	Dendritic cell	CL:0000451	Dendritic cell	CL:0000451	GSE2706_LPS_VS_R848_AND_LPS_2H_STIM_DC		0.012651956	-95.69190601		WITHDRAWN	gluconeogenesis inhibitor	HMGCR	3156	SIGNATURE_DOWN	Homo sapiens	EX_VIVO
benfluorex	2318	benfluorex inhibits mature Dendritic cell stimulated with PGE2 compared to mature Dendritic cell	Dendritic cell	CL:0000451	Dendritic cell	CL:0000451	Dendritic cell	CL:0000451	Dendritic cell	CL:0000451	GSE9946_MATURE_STIMULATORY_VS_PROSTAGLANDINE2_TREATED_MATURE_DC		0.012651956	-95.97165237		WITHDRAWN	gluconeogenesis inhibitor	HMGCR	3156	SIGNATURE_DOWN	Homo sapiens	EX_VIVO
benfluorex	2318	benfluorex inhibits Dendritic cell stimulated with anti-CD209 compared to Dendritic cell	Dendritic cell	CL:0000451	Dendritic cell	CL:0000451	Dendritic cell	CL:0000451	Dendritic cell	CL:0000451	GSE6090_UNSTIM_VS_DC_SIGN_STIM_DC		0.012651956	-96.41924655		WITHDRAWN	gluconeogenesis inhibitor	HMGCR	3156	SIGNATURE_DOWN	Homo sapiens	IN_VITRO
benfluorex	2318	benfluorex inhibits Dendritic cell compared to Dendritic cell stimulated with Newcastle virus	Dendritic cell	CL:0000451	Dendritic cell	CL:0000451	Dendritic cell	CL:0000451	Dendritic cell	CL:0000451	GSE18791_CTRL_VS_NEWCASTLE_VIRUS_DC_1H	0.012651956		-98.47071988		WITHDRAWN	gluconeogenesis inhibitor	HMGCR	3156	SIGNATURE_UP	Homo sapiens	IN_VITRO
benfluorex	2318	benfluorex inhibits Dendritic cell stimulated with IL1 compared to Dendritic cell	Dendritic cell	CL:0000451	Dendritic cell	CL:0000451	Dendritic cell	CL:0000451	Dendritic cell	CL:0000451	GSE53163_DC_treated_IL1_vs_DC_control	0.01555814	0.829701772	-98.72944694		WITHDRAWN	gluconeogenesis inhibitor	HMGCR	3156	SIGNATURE	Homo sapiens	UNKNOWN
benfluorex	2318	benfluorex inhibits Dendritic cell stimulated with IL1 compared to Dendritic cell	Dendritic cell	CL:0000451	Dendritic cell	CL:0000451	Dendritic cell	CL:0000451	Dendritic cell	CL:0000451	GSE53163_DC_treated_IL1_vs_DC_control	0.012651956		-99.66430436		WITHDRAWN	gluconeogenesis inhibitor	HMGCR	3156	SIGNATURE_UP	Homo sapiens	UNKNOWN
benfluorex	2318	benfluorex inhibits Macrophage stimulated with IL4 compared to Macrophage stimulated with IL4 and TGFB	Macrophage	CL:0000235	Macrophage	CL:0000235	Macrophage	CL:0000235	Macrophage	CL:0000235	GSE7568_IL4_VS_IL4_AND_TGFB_TREATED_MACROPHAGE_24H	0.945229532	0.014457831	-95.29147982		WITHDRAWN	gluconeogenesis inhibitor	HMGCR	3156	SIGNATURE	Homo sapiens	IN_VITRO
benfluorex	2318	benfluorex inhibits Macrophage stimulated with IL4, Dexamethasone and TGFB compared to Macrophage stimulated with IL4 and Dexamethasone	Macrophage	CL:0000235	Macrophage	CL:0000235	Macrophage	CL:0000235	Macrophage	CL:0000235	GSE7568_CTRL_VS_24H_TGFB_TREATED_MACROPHAGES_WITH_IL4_AND_DEXAMETHASONE		0.012651956	-95.48675867		WITHDRAWN	gluconeogenesis inhibitor	HMGCR	3156	SIGNATURE_DOWN	Homo sapiens	IN_VITRO
benfluorex	2318	benfluorex inhibits Macrophage stimulated with IFNg (3 hours) compared to Macrophage stimulated with IFNg (24 hours)	Macrophage	CL:0000235	Macrophage	CL:0000235	Macrophage	CL:0000235	Macrophage	CL:0000235	GSE1925_3H_VS_24H_IFNG_STIM_IFNG_PRIMED_MACROPHAGE	0.609171752	0.014457831	-95.55306428		WITHDRAWN	gluconeogenesis inhibitor	HMGCR	3156	SIGNATURE	Homo sapiens	EX_VIVO
benfluorex	2318	benfluorex inhibits Macrophage compared to Macrophage stimulated with Rosiglitazone	Macrophage	CL:0000235	Macrophage	CL:0000235	Macrophage	CL:0000235	Macrophage	CL:0000235	GSE16385_UNTREATED_VS_12H_ROSIGLITAZONE_TREATED_MACROPHAGE	0.012651956		-97.18388661		WITHDRAWN	gluconeogenesis inhibitor	HMGCR	3156	SIGNATURE_UP	Homo sapiens	EX_VIVO
benfluorex	2318	benfluorex inhibits Macrophage stimulated with MCSF compared to Macrophage stimulated with IFNa and MCSF	Macrophage	CL:0000235	Macrophage	CL:0000235	Macrophage	CL:0000235	Macrophage	CL:0000235	GSE1740_MCSF_VS_MCSF_AND_IFNG_DAY2_DERIVED_MACROPHAGE	0.012651956		-97.538232		WITHDRAWN	gluconeogenesis inhibitor	HMGCR	3156	SIGNATURE_UP	Homo sapiens	EX_VIVO
benfluorex	2318	benfluorex inhibits Macrophage stimulated with MCSF compared to Macrophage stimulated with IFNa and MCSF	Macrophage	CL:0000235	Macrophage	CL:0000235	Macrophage	CL:0000235	Macrophage	CL:0000235	GSE1740_MCSF_VS_MCSF_AND_IFNG_DAY2_DERIVED_MACROPHAGE	0.01555814	0.02240568	-97.98206278		WITHDRAWN	gluconeogenesis inhibitor	HMGCR	3156	SIGNATURE	Homo sapiens	EX_VIVO
benfluorex	2318	benfluorex inhibits Macrophage in Endometrial carcinoma compared to Macrophage in Endometrial carcinoma	Macrophage	CL:0000235	Macrophage	CL:0000235	Macrophage	CL:0000235	Macrophage	CL:0000235	Casseta_TumorAssociatedMacrophage_vs_ResidentMacrophage_in_ENCA		0.012651956	-98.32152182		WITHDRAWN	gluconeogenesis inhibitor	HMGCR	3156	SIGNATURE_DOWN	Homo sapiens	PATIENT
benfluorex	2318	benfluorex inhibits Monocyte stimulated with Muramyl Dipeptide and M. tuberculosis compared to Monocyte stimulated with M. tuberculosis	Monocyte	CL:0000576	Monocyte	CL:0000576	Monocyte	CL:0000576	Monocyte	CL:0000576	GSE34156_TLR1_TLR2_LIGAND_VS_NOD2_AND_TLR1_TLR2_LIGAND_6H_TREATED_MONOCYTE		0.012651956	-96.88549049		WITHDRAWN	gluconeogenesis inhibitor	HMGCR	3156	SIGNATURE_DOWN	Homo sapiens	IN_VITRO
benfluorex	2318	benfluorex inhibits Monocyte compared to Monocyte in Breast invasive carcinom	Monocyte	CL:0000576	Monocyte	CL:0000576	Monocyte	CL:0000576	Monocyte	CL:0000576	Casseta_NonClassicalActivated_Monocyte_BRCA_vs_healthy_monocyte		0.047617074	-99.64565461		WITHDRAWN	gluconeogenesis inhibitor	HMGCR	3156	SIGNATURE_DOWN	Homo sapiens	PATIENT
benfluorex	2318	benfluorex inhibits PBMC stimulated with YF17D Vaccine compared to PBMC	PBMC	CL:2000001	PBMC	CL:2000001	PBMC	CL:2000001	PBMC	CL:2000001	GSE13485_CTRL_VS_DAY21_YF17D_VACCINE_PBMC		0.012651956	-95.50540843		WITHDRAWN	gluconeogenesis inhibitor	HMGCR	3156	SIGNATURE_DOWN	Homo sapiens	PATIENT
benfluorex	2318	benfluorex inhibits PBMC stimulated with YF17D Vaccine (1 day) compared to PBMC stimulated with YF17D Vaccine (7 days)	PBMC	CL:2000001	PBMC	CL:2000001	PBMC	CL:2000001	PBMC	CL:2000001	GSE13485_DAY1_VS_DAY7_YF17D_VACCINE_PBMC	0.01555814	0.084996678	-95.62780269		WITHDRAWN	gluconeogenesis inhibitor	HMGCR	3156	SIGNATURE	Homo sapiens	PATIENT
benfluorex	2318	benfluorex inhibits PBMC compared to PBMC in Diabetes	PBMC	CL:2000001	PBMC	CL:2000001	PBMC	CL:2000001	PBMC	CL:2000001	GSE11907_T1D_GPL96_PBMCs		0.012651956	-96.15814994		WITHDRAWN	gluconeogenesis inhibitor	HMGCR	3156	SIGNATURE_DOWN	Homo sapiens	PATIENT
benfluorex	2318	benfluorex inhibits Myeloid compared to Myeloid in Lupus erythematosus	PBMC	CL:2000001	Myeloid		Other	CL:0000763	Myeloid	CL:0000763	GSE10325_MYELOID_VS_LUPUS_MYELOID	0.012651956		-96.1767997		WITHDRAWN	gluconeogenesis inhibitor	HMGCR	3156	SIGNATURE_UP	Homo sapiens	PATIENT
benfluorex	2318	benfluorex inhibits PBMC stimulated with TIV Influenza vaccine (3 days) compared to PBMC stimulated with TIV Influenza vaccine (7 days)	PBMC	CL:2000001	PBMC	CL:2000001	PBMC	CL:2000001	PBMC	CL:2000001	GSE29614_DAY3_VS_DAY7_TIV_FLU_VACCINE_PBMC	0.01555814	0.014457831	-96.67414051		WITHDRAWN	gluconeogenesis inhibitor	HMGCR	3156	SIGNATURE	Homo sapiens	UNKNOWN
benfluorex	2318	benfluorex inhibits PBMC stimulated with YF17D Vaccine (1 day) compared to PBMC stimulated with YF17D Vaccine (3 days)	PBMC	CL:2000001	PBMC	CL:2000001	PBMC	CL:2000001	PBMC	CL:2000001	GSE13485_DAY1_VS_DAY3_YF17D_VACCINE_PBMC	0.01555814	0.014457831	-98.39312407		WITHDRAWN	gluconeogenesis inhibitor	HMGCR	3156	SIGNATURE	Homo sapiens	PATIENT
benfluorex	2318	benfluorex inhibits PBMC stimulated with YF17D Vaccine (21 days) compared to PBMC stimulated with YF17D Vaccine (3 days)	PBMC	CL:2000001	PBMC	CL:2000001	PBMC	CL:2000001	PBMC	CL:2000001	GSE13485_DAY3_VS_DAY21_YF17D_VACCINE_PBMC		0.012651956	-98.54531891		WITHDRAWN	gluconeogenesis inhibitor	HMGCR	3156	SIGNATURE_DOWN	Homo sapiens	PATIENT
benfluorex	2318	benfluorex inhibits PBMC compared to PBMC stimulated with TIV Influenza vaccine	PBMC	CL:2000001	PBMC	CL:2000001	PBMC	CL:2000001	PBMC	CL:2000001	GSE29617_CTRL_VS_DAY3_TIV_FLU_VACCINE_PBMC_2008	0.767210813	0.014457831	-98.69207773		WITHDRAWN	gluconeogenesis inhibitor	HMGCR	3156	SIGNATURE	Homo sapiens	UNKNOWN
benfluorex	2318	benfluorex inhibits PBMC compared to PBMC stimulated with TIV Influenza vaccine	PBMC	CL:2000001	PBMC	CL:2000001	PBMC	CL:2000001	PBMC	CL:2000001	GSE29617_CTRL_VS_TIV_FLU_VACCINE_PBMC_2008	0.682213195	0.014457831	-98.87892377		WITHDRAWN	gluconeogenesis inhibitor	HMGCR	3156	SIGNATURE	Homo sapiens	UNKNOWN
benfluorex	2318	benfluorex inhibits PBMC compared to PBMC in Lupus erythematosus	PBMC	CL:2000001	PBMC	CL:2000001	PBMC	CL:2000001	PBMC	CL:2000001	GSE82221_SLE_GPL10558_GPL13534_PBMCs		0.012651956	-98.99291309		WITHDRAWN	gluconeogenesis inhibitor	HMGCR	3156	SIGNATURE_DOWN	Homo sapiens	PATIENT
benfluorex	2318	benfluorex inhibits PBMC stimulated with YF17D Vaccine (1 day) compared to PBMC stimulated with YF17D Vaccine (3 days)	PBMC	CL:2000001	PBMC	CL:2000001	PBMC	CL:2000001	PBMC	CL:2000001	GSE13485_DAY1_VS_DAY3_YF17D_VACCINE_PBMC	0.012651956		-99.34725849		WITHDRAWN	gluconeogenesis inhibitor	HMGCR	3156	SIGNATURE_UP	Homo sapiens	PATIENT
benfluorex	2318	benfluorex inhibits PBMC stimulated with YF17D Vaccine (1 day) compared to PBMC stimulated with YF17D Vaccine (7 days)	PBMC	CL:2000001	PBMC	CL:2000001	PBMC	CL:2000001	PBMC	CL:2000001	GSE13485_DAY1_VS_DAY7_YF17D_VACCINE_PBMC	0.012651956		-99.92540097		WITHDRAWN	gluconeogenesis inhibitor	HMGCR	3156	SIGNATURE_UP	Homo sapiens	PATIENT
benfluorex	2318	benfluorex inhibits PBMC stimulated with YF17D Vaccine compared to PBMC	PBMC	CL:2000001	PBMC	CL:2000001	PBMC	CL:2000001	PBMC	CL:2000001	GSE13485_CTRL_VS_DAY1_YF17D_VACCINE_PBMC		0.012651956	-99.94405073		WITHDRAWN	gluconeogenesis inhibitor	HMGCR	3156	SIGNATURE_DOWN	Homo sapiens	PATIENT
benfluorex	2318	benfluorex inhibits T regulatory compared to T cell stimulated with FOXP3 mutation	T cell	CL:0000084	T regulatory	CL:0000084	T cell	CL:0000815	T cell	CL:0000084	GSE7460_WT_VS_FOXP3_HET_ACT_TCONV	0.074111513	0.014457831	-95.06726457		WITHDRAWN	gluconeogenesis inhibitor	HMGCR	3156	SIGNATURE	Homo sapiens	EX_VIVO
benfluorex	2318	benfluorex inhibits T CD4+ naïve compared to T helper stimulated with IL12, TGFB, anti-CD3 and anti-CD28	T cell	CL:0000084	T CD4+ naïve	CL:0000084	T cell	CL:0000895	T helper	CL:0000492	GSE2770_UNTREATED_VS_TGFB_AND_IL12_TREATED_ACT_CD4_TCELL_2H	0.023334903	0.235786713	-95.21674141		WITHDRAWN	gluconeogenesis inhibitor	HMGCR	3156	SIGNATURE	Homo sapiens	EX_VIVO
benfluorex	2318	benfluorex inhibits T CD4+ compared to T CD4+ stimulated with IL4 and anti-IL12	T cell	CL:0000084	T CD4+	CL:0000084	T cell	CL:0000624	T CD4+	CL:0000624	GSE17974_IL4_AND_ANTI_IL12_VS_UNTREATED_4H_ACT_CD4_TCELL		0.012651956	-95.3002611		WITHDRAWN	gluconeogenesis inhibitor	HMGCR	3156	SIGNATURE_DOWN	Homo sapiens	EX_VIVO
benfluorex	2318	benfluorex inhibits young T CD4+ memory compared to young T CD4+ memory stimulated with TSST	T cell	CL:0000084	T CD4+ memory	CL:0000084	T cell	CL:0000897	T CD4+ memory	CL:0000897	GSE36476_CTRL_VS_TSST_ACT_16H_MEMORY_CD4_TCELL_YOUNG	0.499651392	0.014457831	-95.36621824		WITHDRAWN	gluconeogenesis inhibitor	HMGCR	3156	SIGNATURE	Homo sapiens	EX_VIVO
benfluorex	2318	benfluorex inhibits T CD4+ stimulated with IL4 and anti-IL12 compared to T CD4+	T cell	CL:0000084	T CD4+	CL:0000084	T cell	CL:0000624	T CD4+	CL:0000624	GSE17974_IL4_AND_ANTI_IL12_VS_UNTREATED_1H_ACT_CD4_TCELL	0.012651956		-95.4308094		WITHDRAWN	gluconeogenesis inhibitor	HMGCR	3156	SIGNATURE_UP	Homo sapiens	EX_VIVO
benfluorex	2318	benfluorex inhibits central memory T CD4+ memory compared to effector T CD4+ memory	T cell	CL:0000084	T CD4+ memory	CL:0000084	T cell	CL:0000897	T CD4+ memory	CL:0000897	GSE11057_EFF_MEM_VS_CENT_MEM_CD4_TCELL		0.012651956	-95.67325625		WITHDRAWN	gluconeogenesis inhibitor	HMGCR	3156	SIGNATURE_DOWN	Homo sapiens	IN_VIVO
benfluorex	2318	benfluorex inhibits T CD4+ stimulated with cultured (0 hours) compared to T CD4+ stimulated with cultured (48 hours)	T cell	CL:0000084	T CD4+	CL:0000084	T cell	CL:0000624	T CD4+	CL:0000624	GSE17974_0H_VS_48H_IN_VITRO_ACT_CD4_TCELL	0.01555814	0.014457831	-95.73991031		WITHDRAWN	gluconeogenesis inhibitor	HMGCR	3156	SIGNATURE	Homo sapiens	EX_VIVO
benfluorex	2318	benfluorex inhibits T CD4+ stimulated with cultured (0 hours) compared to T CD4+ stimulated with cultured (72 hours)	T cell	CL:0000084	T CD4+	CL:0000084	T cell	CL:0000624	T CD4+	CL:0000624	GSE17974_0H_VS_72H_IN_VITRO_ACT_CD4_TCELL	0.093396622	0.014457831	-96.07623318		WITHDRAWN	gluconeogenesis inhibitor	HMGCR	3156	SIGNATURE	Homo sapiens	EX_VIVO
benfluorex	2318	benfluorex inhibits T CD4+ memory compared to T helper 1	T cell	CL:0000084	T CD4+ memory	CL:0000084	T cell	CL:0000897	T helper 1	CL:0000545	GSE3982_CENT_MEMORY_CD4_TCELL_VS_TH1	0.023334903	0.014457831	-96.11360239		WITHDRAWN	gluconeogenesis inhibitor	HMGCR	3156	SIGNATURE	Homo sapiens	UNKNOWN
benfluorex	2318	benfluorex inhibits T helper 1 naïve compared to T helper 1	T cell	CL:0000084	T helper 1 naïve	CL:0000084	T cell	CL:0000545	T helper 1	CL:0000545	GSE32901_NAIVE_VS_TH1_CD4_TCELL	0.027238369		-96.12085043		WITHDRAWN	gluconeogenesis inhibitor	HMGCR	3156	SIGNATURE_UP	Homo sapiens	IN_VITRO
benfluorex	2318	benfluorex inhibits T CD4+ compared to T CD4+ stimulated with IL4 and anti-IL12	T cell	CL:0000084	T CD4+	CL:0000084	T cell	CL:0000624	T CD4+	CL:0000624	GSE17974_IL4_AND_ANTI_IL12_VS_UNTREATED_12H_ACT_CD4_TCELL		0.012651956	-96.34464752		WITHDRAWN	gluconeogenesis inhibitor	HMGCR	3156	SIGNATURE_DOWN	Homo sapiens	EX_VIVO
benfluorex	2318	benfluorex inhibits T CD4+ in Lupus erythematosus compared to B cell in Lupus erythematosus	T cell	CL:0000084	T CD4+	CL:0000236	B cell	CL:0000624	B cell	CL:0000236	GSE10325_LUPUS_CD4_TCELL_VS_LUPUS_BCELL	0.012651956		-96.36329728		WITHDRAWN	gluconeogenesis inhibitor	HMGCR	3156	SIGNATURE_UP	Homo sapiens	PATIENT
benfluorex	2318	benfluorex inhibits T CD4+ memory compared to T helper 2	T cell	CL:0000084	T CD4+ memory	CL:0000084	T cell	CL:0000897	T helper 2	CL:0000546	GSE3982_CENT_MEMORY_CD4_TCELL_VS_TH2	0.204876246	0.014457831	-96.37518685		WITHDRAWN	gluconeogenesis inhibitor	HMGCR	3156	SIGNATURE	Homo sapiens	UNKNOWN
benfluorex	2318	benfluorex inhibits T CD4+ naïve compared to CD25+ T regulatory stimulated with IL4	T cell	CL:0000084	T CD4+ naïve	CL:0000084	T cell	CL:0000895	T regulatory	CL:0000815	GSE24634_NAIVE_CD4_TCELL_VS_DAY5_IL4_CONV_TREG	0.359036283	0.014457831	-96.6367713		WITHDRAWN	gluconeogenesis inhibitor	HMGCR	3156	SIGNATURE	Homo sapiens	EX_VIVO
benfluorex	2318	benfluorex inhibits young T CD4+ memory compared to young T CD4+ memory stimulated with TSST	T cell	CL:0000084	T CD4+ memory	CL:0000084	T cell	CL:0000897	T CD4+ memory	CL:0000897	GSE36476_CTRL_VS_TSST_ACT_72H_MEMORY_CD4_TCELL_YOUNG	0.744292773	0.014457831	-97.34678625		WITHDRAWN	gluconeogenesis inhibitor	HMGCR	3156	SIGNATURE	Homo sapiens	EX_VIVO
benfluorex	2318	benfluorex inhibits T CD4+ naïve compared to T helper 1	T cell	CL:0000084	T CD4+ naïve	CL:0000084	T cell	CL:0000895	T helper 1	CL:0000545	GSE22886_NAIVE_CD4_TCELL_VS_12H_ACT_TH1	0.116759021	0.014457831	-97.42152466		WITHDRAWN	gluconeogenesis inhibitor	HMGCR	3156	SIGNATURE	Homo sapiens	IN_SILICO
benfluorex	2318	benfluorex inhibits T CD4+ compared to T CD4+ stimulated with IL4 and anti-IL12	T cell	CL:0000084	T CD4+	CL:0000084	T cell	CL:0000624	T CD4+	CL:0000624	GSE17974_CTRL_VS_ACT_IL4_AND_ANTI_IL12_24H_CD4_TCELL	0.05231467	0.014457831	-97.83258595		WITHDRAWN	gluconeogenesis inhibitor	HMGCR	3156	SIGNATURE	Homo sapiens	EX_VIVO
benfluorex	2318	benfluorex inhibits T CD4+ naïve compared to activated T CD4+	T cell	CL:0000084	T CD4+ naïve	CL:0000084	T cell	CL:0000895	T CD4+	CL:0000624	GSE28726_NAIVE_VS_ACTIVATED_CD4_TCELL	0.01555814	0.014457831	-97.94469357		WITHDRAWN	gluconeogenesis inhibitor	HMGCR	3156	SIGNATURE	Homo sapiens	IN_VITRO
benfluorex	2318	benfluorex inhibits T helper stimulated with IL4, TGFB, anti-CD3 and anti-CD28 compared to T helper stimulated with IL12, anti-CD3 and anti-CD28	T cell	CL:0000084	T helper	CL:0000084	T cell	CL:0000492	T helper	CL:0000492	GSE2770_TGFB_AND_IL4_VS_IL12_TREATED_ACT_CD4_TCELL_6H	0.248893779	0.014457831	-98.0941704		WITHDRAWN	gluconeogenesis inhibitor	HMGCR	3156	SIGNATURE	Homo sapiens	EX_VIVO
benfluorex	2318	benfluorex inhibits T CD4+ stimulated with cultured (0 hours) compared to T CD4+ stimulated with cultured (12 hours)	T cell	CL:0000084	T CD4+	CL:0000084	T cell	CL:0000624	T CD4+	CL:0000624	GSE17974_0H_VS_12H_IN_VITRO_ACT_CD4_TCELL	0.18456739	0.014457831	-98.28101644		WITHDRAWN	gluconeogenesis inhibitor	HMGCR	3156	SIGNATURE	Homo sapiens	EX_VIVO
benfluorex	2318	benfluorex inhibits T CD4+ naïve compared to CD25+ T regulatory stimulated with IL4	T cell	CL:0000084	T CD4+ naïve	CL:0000084	T cell	CL:0000895	T regulatory	CL:0000815	GSE24634_NAIVE_CD4_TCELL_VS_DAY3_IL4_CONV_TREG	0.09734803	0.014457831	-98.80418535		WITHDRAWN	gluconeogenesis inhibitor	HMGCR	3156	SIGNATURE	Homo sapiens	EX_VIVO
benfluorex	2318	benfluorex inhibits T CD4+ stimulated with cultured (0 hours) compared to T CD4+ stimulated with cultured (24 hours)	T cell	CL:0000084	T CD4+	CL:0000084	T cell	CL:0000624	T CD4+	CL:0000624	GSE17974_0H_VS_24H_IN_VITRO_ACT_CD4_TCELL	0.01555814	0.02240568	-98.84155456		WITHDRAWN	gluconeogenesis inhibitor	HMGCR	3156	SIGNATURE	Homo sapiens	EX_VIVO
benfluorex	2318	benfluorex inhibits T CD4+ naïve compared to Dendritic cell	T cell	CL:0000084	T CD4+ naïve	CL:0000451	Dendritic cell	CL:0000895	Dendritic cell	CL:0000451	GSE22886_NAIVE_CD4_TCELL_VS_DC	0.155001738	0.014457831	-98.91629297		WITHDRAWN	gluconeogenesis inhibitor	HMGCR	3156	SIGNATURE	Homo sapiens	IN_SILICO
benfluorex	2318	benfluorex inhibits T CD4+ naïve compared to T helper 1	T cell	CL:0000084	T CD4+ naïve	CL:0000084	T cell	CL:0000895	T helper 1	CL:0000545	GSE22886_NAIVE_CD4_TCELL_VS_48H_ACT_TH1	0.145113966	0.014457831	-99.73841555		WITHDRAWN	gluconeogenesis inhibitor	HMGCR	3156	SIGNATURE	Homo sapiens	IN_SILICO
benfluorex	2318	benfluorex inhibits T cell compared to T cell	T cell	CL:0000084	T cell	CL:0000084	T cell	CL:0000084	T cell	CL:0000084	GSE22886_UNSTIM_VS_STIM_MEMORY_TCELL	0.063593534	0.014457831	-99.81315396		WITHDRAWN	gluconeogenesis inhibitor	HMGCR	3156	SIGNATURE	Homo sapiens	IN_SILICO
benfluorex	2318	benfluorex inhibits T CD4+ stimulated with cultured (0 hours) compared to T CD4+ stimulated with cultured (24 hours)	T cell	CL:0000084	T CD4+	CL:0000084	T cell	CL:0000624	T CD4+	CL:0000624	GSE17974_0H_VS_24H_IN_VITRO_ACT_CD4_TCELL	0.012651956		-99.8694517		WITHDRAWN	gluconeogenesis inhibitor	HMGCR	3156	SIGNATURE_UP	Homo sapiens	EX_VIVO
mefloquine	4046	mefloquine inhibits B cell in Lupus erythematosus compared to Myeloid in Lupus erythematosus	B cell	CL:0000236	B cell		Other	CL:0000236	Myeloid	CL:0000763	GSE10325_LUPUS_BCELL_VS_LUPUS_MYELOID	0.197391313	0.024138553	-96.11360239	0.63611947	APPROVED	hemoglobin antagonist, adenosine receptor antagonist	ADORA2A, HBA1	135, 3039	SIGNATURE	Homo sapiens	PATIENT
mefloquine	4046	mefloquine inhibits B cell compared to Basophil	B cell	CL:0000236	B cell	CL:0000767	Basophil	CL:0000236	Basophil	CL:0000767	GSE3982_BCELL_VS_BASOPHIL	0.18530456	0.02765377	-96.26307922	0.63611947	APPROVED	hemoglobin antagonist, adenosine receptor antagonist	ADORA2A, HBA1	135, 3039	SIGNATURE	Homo sapiens	UNKNOWN
mefloquine	4046	mefloquine inhibits B cell memory compared to B cell na茂ve	B cell	CL:0000236	B cell memory	CL:0000236	B cell	CL:0000787	B cell na茂ve	CL:0000788	GSE17186_MEMORY_VS_NAIVE_BCELL	0.275304393	0.88409407	-96.44992526	0.63611947	APPROVED	hemoglobin antagonist, adenosine receptor antagonist	ADORA2A, HBA1	135, 3039	SIGNATURE	Homo sapiens	PATIENT
mefloquine	4046	mefloquine inhibits B cell na茂ve compared to Monocyte	B cell	CL:0000236	B cell na茂ve	CL:0000576	Monocyte	CL:0000788	Monocyte	CL:0000576	GSE22886_NAIVE_BCELL_VS_MONOCYTE	0.940739627	0.027530864	-96.6367713	0.63611947	APPROVED	hemoglobin antagonist, adenosine receptor antagonist	ADORA2A, HBA1	135, 3039	SIGNATURE	Homo sapiens	IN_SILICO
mefloquine	4046	mefloquine inhibits B cell na茂ve compared to Monocyte	B cell	CL:0000236	B cell na茂ve	CL:0000576	Monocyte	CL:0000788	Monocyte	CL:0000576	GSE22886_NAIVE_BCELL_VS_MONOCYTE	0.702846794	0.024138553	-96.89835575	0.63611947	APPROVED	hemoglobin antagonist, adenosine receptor antagonist	ADORA2A, HBA1	135, 3039	SIGNATURE	Homo sapiens	IN_SILICO
mefloquine	4046	mefloquine inhibits B cell in Lupus erythematosus compared to Myeloid in Lupus erythematosus	B cell	CL:0000236	B cell		Other	CL:0000236	Myeloid	CL:0000763	GSE10325_LUPUS_BCELL_VS_LUPUS_MYELOID	0.06617912	0.027530864	-97.15994021	0.63611947	APPROVED	hemoglobin antagonist, adenosine receptor antagonist	ADORA2A, HBA1	135, 3039	SIGNATURE	Homo sapiens	PATIENT
mefloquine	4046	mefloquine inhibits B cell na茂ve compared to Neutrophil	B cell	CL:0000236	B cell na茂ve	CL:0000775	Neutrophil	CL:0000788	Neutrophil	CL:0000775	GSE22886_NAIVE_BCELL_VS_NEUTROPHIL	0.041656937	0.027530864	-97.57100149	0.63611947	APPROVED	hemoglobin antagonist, adenosine receptor antagonist	ADORA2A, HBA1	135, 3039	SIGNATURE	Homo sapiens	IN_SILICO
mefloquine	4046	mefloquine inhibits B cell na茂ve compared to Dendritic cell	B cell	CL:0000236	B cell na茂ve	CL:0000451	Dendritic cell	CL:0000788	Dendritic cell	CL:0000451	GSE22886_NAIVE_BCELL_VS_DC	0.289204579	0.024138553	-98.69207773	0.63611947	APPROVED	hemoglobin antagonist, adenosine receptor antagonist	ADORA2A, HBA1	135, 3039	SIGNATURE	Homo sapiens	IN_SILICO
mefloquine	4046	mefloquine inhibits B cell na茂ve compared to Dendritic cell	B cell	CL:0000236	B cell na茂ve	CL:0000451	Dendritic cell	CL:0000788	Dendritic cell	CL:0000451	GSE22886_NAIVE_BCELL_VS_DC	0.214405098	0.027530864	-98.99103139	0.63611947	APPROVED	hemoglobin antagonist, adenosine receptor antagonist	ADORA2A, HBA1	135, 3039	SIGNATURE	Homo sapiens	IN_SILICO
mefloquine	4046	mefloquine inhibits B cell compared to Monocyte	B cell	CL:0000236	B cell	CL:0000576	Monocyte	CL:0000236	Monocyte	CL:0000576	GSE29618_BCELL_VS_MONOCYTE	0.99203421	0.024138553	-99.28998505	0.63611947	APPROVED	hemoglobin antagonist, adenosine receptor antagonist	ADORA2A, HBA1	135, 3039	SIGNATURE	Homo sapiens	UNKNOWN
mefloquine	4046	mefloquine inhibits B cell compared to Monocyte	B cell	CL:0000236	B cell	CL:0000576	Monocyte	CL:0000236	Monocyte	CL:0000576	GSE29618_BCELL_VS_MONOCYTE	0.924421892	0.027530864	-99.5142003	0.63611947	APPROVED	hemoglobin antagonist, adenosine receptor antagonist	ADORA2A, HBA1	135, 3039	SIGNATURE	Homo sapiens	UNKNOWN
mefloquine	4046	mefloquine inhibits B cell compared to Myeloid	B cell	CL:0000236	B cell		Other	CL:0000236	Myeloid	CL:0000763	GSE10325_BCELL_VS_MYELOID	0.990082673	0.024138553	-99.70104634	0.63611947	APPROVED	hemoglobin antagonist, adenosine receptor antagonist	ADORA2A, HBA1	135, 3039	SIGNATURE	Homo sapiens	IN_VIVO
mefloquine	4046	mefloquine inhibits B cell compared to Myeloid	B cell	CL:0000236	B cell		Other	CL:0000236	Myeloid	CL:0000763	GSE10325_BCELL_VS_MYELOID	0.985773754	0.027530864	-99.77578475	0.63611947	APPROVED	hemoglobin antagonist, adenosine receptor antagonist	ADORA2A, HBA1	135, 3039	SIGNATURE	Homo sapiens	IN_VIVO
mefloquine	4046	mefloquine inhibits Dendritic cell compared to Dendritic cell stimulated with Newcastle virus	Dendritic cell	CL:0000451	Dendritic cell	CL:0000451	Dendritic cell	CL:0000451	Dendritic cell	CL:0000451	GSE18791_CTRL_VS_NEWCASTLE_VIRUS_DC_10H	0.024169484		-95.4308094	0.63611947	APPROVED	hemoglobin antagonist, adenosine receptor antagonist	ADORA2A, HBA1	135, 3039	SIGNATURE_UP	Homo sapiens	IN_VITRO
mefloquine	4046	mefloquine inhibits Dendritic cell compared to Dendritic cell stimulated with Newcastle virus	Dendritic cell	CL:0000451	Dendritic cell	CL:0000451	Dendritic cell	CL:0000451	Dendritic cell	CL:0000451	GSE18791_CTRL_VS_NEWCASTLE_VIRUS_DC_4H	0.024169484		-95.69190601	0.63611947	APPROVED	hemoglobin antagonist, adenosine receptor antagonist	ADORA2A, HBA1	135, 3039	SIGNATURE_UP	Homo sapiens	IN_VITRO
mefloquine	4046	mefloquine inhibits Dendritic cell compared to Dendritic cell stimulated with Rosiglitazone	Dendritic cell	CL:0000451	Dendritic cell	CL:0000451	Dendritic cell	CL:0000451	Dendritic cell	CL:0000451	GSE5679_CTRL_VS_PPARG_LIGAND_ROSIGLITAZONE_TREATED_DC	0.024169484		-95.74785528	0.63611947	APPROVED	hemoglobin antagonist, adenosine receptor antagonist	ADORA2A, HBA1	135, 3039	SIGNATURE_UP	Homo sapiens	EX_VIVO
mefloquine	4046	mefloquine inhibits Dendritic cell compared to Dendritic cell stimulated with RARA agonist	Dendritic cell	CL:0000451	Dendritic cell	CL:0000451	Dendritic cell	CL:0000451	Dendritic cell	CL:0000451	GSE5679_CTRL_VS_RARA_AGONIST_AM580_TREATED_DC	0.024169484		-95.76650504	0.63611947	APPROVED	hemoglobin antagonist, adenosine receptor antagonist	ADORA2A, HBA1	135, 3039	SIGNATURE_UP	Homo sapiens	EX_VIVO
mefloquine	4046	mefloquine inhibits Dendritic cell compared to Dendritic cell stimulated with SIV and HIV	Dendritic cell	CL:0000451	Dendritic cell	CL:0000451	Dendritic cell	CL:0000451	Dendritic cell	CL:0000451	GSE22589_HEALTHY_VS_HIV_AND_SIV_INFECTED_DC	0.024169484		-96.32599776	0.63611947	APPROVED	hemoglobin antagonist, adenosine receptor antagonist	ADORA2A, HBA1	135, 3039	SIGNATURE_UP	Homo sapiens	IN_VITRO
mefloquine	4046	mefloquine inhibits Dendritic cell stimulated with R848 compared to Dendritic cell stimulated with R848 and LPS	Dendritic cell	CL:0000451	Dendritic cell	CL:0000451	Dendritic cell	CL:0000451	Dendritic cell	CL:0000451	GSE2706_R848_VS_R848_AND_LPS_2H_STIM_DC	0.050650209		-96.45654606	0.63611947	APPROVED	hemoglobin antagonist, adenosine receptor antagonist	ADORA2A, HBA1	135, 3039	SIGNATURE_UP	Homo sapiens	EX_VIVO
mefloquine	4046	mefloquine inhibits Dendritic cell stimulated with TNF inhibitor compared to Dendritic cell	Dendritic cell	CL:0000451	Dendritic cell	CL:0000451	Dendritic cell	CL:0000451	Dendritic cell	CL:0000451	GSE9239_CTRL_VS_TNF_INHIBITOR_TREATED_DC		0.025492303	-96.6616934	0.63611947	APPROVED	hemoglobin antagonist, adenosine receptor antagonist	ADORA2A, HBA1	135, 3039	SIGNATURE_DOWN	Homo sapiens	EX_VIVO
mefloquine	4046	mefloquine inhibits Dendritic cell compared to Dendritic cell	Dendritic cell	CL:0000451	Dendritic cell	CL:0000451	Dendritic cell	CL:0000451	Dendritic cell	CL:0000451	GSE14000_TRANSLATED_RNA_VS_MRNA_DC	0.032275928		-96.6616934	0.63611947	APPROVED	hemoglobin antagonist, adenosine receptor antagonist	ADORA2A, HBA1	135, 3039	SIGNATURE_UP	Homo sapiens	EX_VIVO
mefloquine	4046	mefloquine inhibits Dendritic cell stimulated with T.gondii compared to Dendritic cell stimulated with M.tuberculosis	Dendritic cell	CL:0000451	Dendritic cell	CL:0000451	Dendritic cell	CL:0000451	Dendritic cell	CL:0000451	GSE360_T_GONDII_VS_M_TUBERCULOSIS_DC	0.335739949	0.037580311	-96.82361734	0.63611947	APPROVED	hemoglobin antagonist, adenosine receptor antagonist	ADORA2A, HBA1	135, 3039	SIGNATURE	Homo sapiens	IN_VITRO
mefloquine	4046	mefloquine inhibits Dendritic cell compared to Dendritic cell stimulated with Newcastle virus	Dendritic cell	CL:0000451	Dendritic cell	CL:0000451	Dendritic cell	CL:0000451	Dendritic cell	CL:0000451	GSE18791_CTRL_VS_NEWCASTLE_VIRUS_DC_4H	0.032275928		-97.01603879	0.63611947	APPROVED	hemoglobin antagonist, adenosine receptor antagonist	ADORA2A, HBA1	135, 3039	SIGNATURE_UP	Homo sapiens	IN_VITRO
mefloquine	4046	mefloquine inhibits Dendritic cell compared to Dendritic cell stimulated with Newcastle virus	Dendritic cell	CL:0000451	Dendritic cell	CL:0000451	Dendritic cell	CL:0000451	Dendritic cell	CL:0000451	GSE18791_CTRL_VS_NEWCASTLE_VIRUS_DC_6H	0.032275928		-97.09063782	0.63611947	APPROVED	hemoglobin antagonist, adenosine receptor antagonist	ADORA2A, HBA1	135, 3039	SIGNATURE_UP	Homo sapiens	IN_VITRO
mefloquine	4046	mefloquine inhibits Dendritic cell stimulated with IFNg and IL1 compared to Dendritic cell	Dendritic cell	CL:0000451	Dendritic cell	CL:0000451	Dendritic cell	CL:0000451	Dendritic cell	CL:0000451	GSE53163_DC_treated_IL1_IFNG_vs_DC_control	0.073391476	0.719391674	-97.34678625	0.63611947	APPROVED	hemoglobin antagonist, adenosine receptor antagonist	ADORA2A, HBA1	135, 3039	SIGNATURE	Homo sapiens	UNKNOWN
mefloquine	4046	mefloquine inhibits Dendritic cell compared to Dendritic cell	Dendritic cell	CL:0000451	Dendritic cell	CL:0000451	Dendritic cell	CL:0000451	Dendritic cell	CL:0000451	GSE14000_TRANSLATED_RNA_VS_MRNA_DC	0.034595992	0.991465233	-97.6083707	0.63611947	APPROVED	hemoglobin antagonist, adenosine receptor antagonist	ADORA2A, HBA1	135, 3039	SIGNATURE	Homo sapiens	EX_VIVO
mefloquine	4046	mefloquine inhibits Dendritic cell stimulated with T.gondii compared to Dendritic cell stimulated with B.malayi	Dendritic cell	CL:0000451	Dendritic cell	CL:0000451	Dendritic cell	CL:0000451	Dendritic cell	CL:0000451	GSE360_T_GONDII_VS_B_MALAYI_HIGH_DOSE_DC	0.474058071	0.02765377	-97.64573991	0.63611947	APPROVED	hemoglobin antagonist, adenosine receptor antagonist	ADORA2A, HBA1	135, 3039	SIGNATURE	Homo sapiens	IN_VITRO
mefloquine	4046	mefloquine inhibits Dendritic cell compared to Dendritic cell stimulated with Newcastle virus	Dendritic cell	CL:0000451	Dendritic cell	CL:0000451	Dendritic cell	CL:0000451	Dendritic cell	CL:0000451	GSE18791_CTRL_VS_NEWCASTLE_VIRUS_DC_10H	0.025492303		-97.76202909	0.63611947	APPROVED	hemoglobin antagonist, adenosine receptor antagonist	ADORA2A, HBA1	135, 3039	SIGNATURE_UP	Homo sapiens	IN_VITRO
mefloquine	4046	mefloquine inhibits Dendritic cell stimulated with IFNg and IL1 compared to Dendritic cell	Dendritic cell	CL:0000451	Dendritic cell	CL:0000451	Dendritic cell	CL:0000451	Dendritic cell	CL:0000451	GSE53163_DC_treated_IL1_IFNG_vs_DC_control	0.093775461	0.438329238	-97.79521674	0.63611947	APPROVED	hemoglobin antagonist, adenosine receptor antagonist	ADORA2A, HBA1	135, 3039	SIGNATURE	Homo sapiens	UNKNOWN
mefloquine	4046	mefloquine inhibits Dendritic cell compared to Dendritic cell stimulated with Newcastle virus	Dendritic cell	CL:0000451	Dendritic cell	CL:0000451	Dendritic cell	CL:0000451	Dendritic cell	CL:0000451	GSE18791_CTRL_VS_NEWCASTLE_VIRUS_DC_12H	0.025492303		-97.96717643	0.63611947	APPROVED	hemoglobin antagonist, adenosine receptor antagonist	ADORA2A, HBA1	135, 3039	SIGNATURE_UP	Homo sapiens	IN_VITRO
mefloquine	4046	mefloquine inhibits Dendritic cell compared to Dendritic cell stimulated with Newcastle virus	Dendritic cell	CL:0000451	Dendritic cell	CL:0000451	Dendritic cell	CL:0000451	Dendritic cell	CL:0000451	GSE18791_CTRL_VS_NEWCASTLE_VIRUS_DC_6H	0.024169484		-98.28422231	0.63611947	APPROVED	hemoglobin antagonist, adenosine receptor antagonist	ADORA2A, HBA1	135, 3039	SIGNATURE_UP	Homo sapiens	IN_VITRO
mefloquine	4046	mefloquine inhibits Dendritic cell stimulated with L.donovani compared to Macrophage stimulated with L.donovani	Dendritic cell	CL:0000451	Dendritic cell	CL:0000235	Macrophage	CL:0000451	Macrophage	CL:0000235	GSE360_DC_VS_MAC_L_DONOVANI	0.530589361	0.03792517	-98.50523169	0.63611947	APPROVED	hemoglobin antagonist, adenosine receptor antagonist	ADORA2A, HBA1	135, 3039	SIGNATURE	Homo sapiens	IN_VITRO
mefloquine	4046	mefloquine inhibits Dendritic cell compared to Dendritic cell stimulated with Newcastle virus	Dendritic cell	CL:0000451	Dendritic cell	CL:0000451	Dendritic cell	CL:0000451	Dendritic cell	CL:0000451	GSE18791_CTRL_VS_NEWCASTLE_VIRUS_DC_6H	0.025492303		-98.52666915	0.63611947	APPROVED	hemoglobin antagonist, adenosine receptor antagonist	ADORA2A, HBA1	135, 3039	SIGNATURE_UP	Homo sapiens	IN_VITRO
mefloquine	4046	mefloquine inhibits Dendritic cell compared to Dendritic cell stimulated with LPS	Dendritic cell	CL:0000451	Dendritic cell	CL:0000451	Dendritic cell	CL:0000451	Dendritic cell	CL:0000451	GSE14000_UNSTIM_VS_4H_LPS_DC	0.025492303		-99.04886236	0.63611947	APPROVED	hemoglobin antagonist, adenosine receptor antagonist	ADORA2A, HBA1	135, 3039	SIGNATURE_UP	Homo sapiens	EX_VIVO
mefloquine	4046	mefloquine inhibits Dendritic cell compared to Dendritic cell stimulated with Vitamin D	Dendritic cell	CL:0000451	Dendritic cell	CL:0000451	Dendritic cell	CL:0000451	Dendritic cell	CL:0000451	GSE13762_CTRL_VS_125_VITAMIND_DAY5_DC	0.433379105	0.540900508	-99.10313901	0.63611947	APPROVED	hemoglobin antagonist, adenosine receptor antagonist	ADORA2A, HBA1	135, 3039	SIGNATURE	Homo sapiens	IN_VITRO
mefloquine	4046	mefloquine inhibits Dendritic cell compared to Dendritic cell stimulated with Vitamin D	Dendritic cell	CL:0000451	Dendritic cell	CL:0000451	Dendritic cell	CL:0000451	Dendritic cell	CL:0000451	GSE13762_CTRL_VS_125_VITAMIND_DAY5_DC	0.623178005	0.379975703	-99.36472347	0.63611947	APPROVED	hemoglobin antagonist, adenosine receptor antagonist	ADORA2A, HBA1	135, 3039	SIGNATURE	Homo sapiens	IN_VITRO
mefloquine	4046	mefloquine inhibits Dendritic cell stimulated with L.donovani compared to Macrophage stimulated with L.donovani	Dendritic cell	CL:0000451	Dendritic cell	CL:0000235	Macrophage	CL:0000451	Macrophage	CL:0000235	GSE360_DC_VS_MAC_L_DONOVANI	0.751764292	0.027530864	-99.70104634	0.63611947	APPROVED	hemoglobin antagonist, adenosine receptor antagonist	ADORA2A, HBA1	135, 3039	SIGNATURE	Homo sapiens	IN_VITRO
mefloquine	4046	mefloquine inhibits Dendritic cell compared to Dendritic cell stimulated with SIV and HIV	Dendritic cell	CL:0000451	Dendritic cell	CL:0000451	Dendritic cell	CL:0000451	Dendritic cell	CL:0000451	GSE22589_HEALTHY_VS_HIV_AND_SIV_INFECTED_DC	0.034595992	0.646653265	-99.85052317	0.63611947	APPROVED	hemoglobin antagonist, adenosine receptor antagonist	ADORA2A, HBA1	135, 3039	SIGNATURE	Homo sapiens	IN_VITRO
mefloquine	4046	mefloquine inhibits Dendritic cell compared to Dendritic cell stimulated with SIV and HIV	Dendritic cell	CL:0000451	Dendritic cell	CL:0000451	Dendritic cell	CL:0000451	Dendritic cell	CL:0000451	GSE22589_HEALTHY_VS_HIV_AND_SIV_INFECTED_DC	0.041656937	0.433545422	-99.92526158	0.63611947	APPROVED	hemoglobin antagonist, adenosine receptor antagonist	ADORA2A, HBA1	135, 3039	SIGNATURE	Homo sapiens	IN_VITRO
mefloquine	4046	mefloquine inhibits Macrophage stimulated with INFg, Rosiglitazone and TNF compared to Macrophage stimulated with Rosiglitazone	Macrophage	CL:0000235	Macrophage	CL:0000235	Macrophage	CL:0000235	Macrophage	CL:0000235	GSE16385_IFNG_TNF_VS_UNSTIM_MACROPHAGE_ROSIGLITAZONE_TREATED	0.381527079	0.388847516	-96.86098655	0.63611947	APPROVED	hemoglobin antagonist, adenosine receptor antagonist	ADORA2A, HBA1	135, 3039	SIGNATURE	Homo sapiens	EX_VIVO
mefloquine	4046	mefloquine inhibits Macrophage stimulated with INFg and TNF compared to Macrophage stimulated with Rosiglitazone	Macrophage	CL:0000235	Macrophage	CL:0000235	Macrophage	CL:0000235	Macrophage	CL:0000235	GSE16385_IFNG_TNF_VS_ROSIGLITAZONE_STIM_MACROPHAGE	0.025492303		-97.57553152	0.63611947	APPROVED	hemoglobin antagonist, adenosine receptor antagonist	ADORA2A, HBA1	135, 3039	SIGNATURE_UP	Homo sapiens	EX_VIVO
mefloquine	4046	mefloquine inhibits Macrophage compared to Macrophage stimulated with B.malayi	Macrophage	CL:0000235	Macrophage	CL:0000235	Macrophage	CL:0000235	Macrophage	CL:0000235	GSE360_CTRL_VS_B_MALAYI_LOW_DOSE_MAC	0.342871786	0.202359347	-97.86995516	0.63611947	APPROVED	hemoglobin antagonist, adenosine receptor antagonist	ADORA2A, HBA1	135, 3039	SIGNATURE	Homo sapiens	IN_VITRO
mefloquine	4046	mefloquine inhibits Monocyte compared to Monocyte stimulated with M. tuberculosis	Monocyte	CL:0000576	Monocyte	CL:0000576	Monocyte	CL:0000576	Monocyte	CL:0000576	GSE8921_UNSTIM_0H_VS_TLR1_2_STIM_MONOCYTE_24H	0.050650209		-95.02051473	0.63611947	APPROVED	hemoglobin antagonist, adenosine receptor antagonist	ADORA2A, HBA1	135, 3039	SIGNATURE_UP	Homo sapiens	IN_VITRO
mefloquine	4046	mefloquine inhibits Monocyte stimulated with HCMV compared to Monocyte stimulated with HCMV and PI3K inhibitor	Monocyte	CL:0000576	Monocyte	CL:0000576	Monocyte	CL:0000576	Monocyte	CL:0000576	GSE9601_UNTREATED_VS_PI3K_INHIBITOR_TREATED_HCMV_INF_MONOCYTE	0.042006122	0.42170203	-95.02989537	0.63611947	APPROVED	hemoglobin antagonist, adenosine receptor antagonist	ADORA2A, HBA1	135, 3039	SIGNATURE	Homo sapiens	IN_VITRO
mefloquine	4046	mefloquine inhibits Monocyte stimulated with M. tuberculosis compared to Monocyte stimulated with Muramyl Dipeptide and M. tuberculosis	Monocyte	CL:0000576	Monocyte	CL:0000576	Monocyte	CL:0000576	Monocyte	CL:0000576	GSE34156_NOD2_LIGAND_VS_TLR1_TLR2_LIGAND_24H_TREATED_MONOCYTE		0.032275928	-95.46810891	0.63611947	APPROVED	hemoglobin antagonist, adenosine receptor antagonist	ADORA2A, HBA1	135, 3039	SIGNATURE_DOWN	Homo sapiens	IN_VITRO
mefloquine	4046	mefloquine inhibits Monocyte compared to Monocyte stimulated with M. tuberculosis	Monocyte	CL:0000576	Monocyte	CL:0000576	Monocyte	CL:0000576	Monocyte	CL:0000576	GSE8921_UNSTIM_0H_VS_TLR1_2_STIM_MONOCYTE_24H	0.032275928		-95.87840358	0.63611947	APPROVED	hemoglobin antagonist, adenosine receptor antagonist	ADORA2A, HBA1	135, 3039	SIGNATURE_UP	Homo sapiens	IN_VITRO
mefloquine	4046	mefloquine inhibits Monocyte stimulated with M. tuberculosis compared to Monocyte stimulated with Muramyl Dipeptide and M. tuberculosis	Monocyte	CL:0000576	Monocyte	CL:0000576	Monocyte	CL:0000576	Monocyte	CL:0000576	GSE34156_NOD2_LIGAND_VS_TLR1_TLR2_LIGAND_24H_TREATED_MONOCYTE		0.024169484	-96.02760164	0.63611947	APPROVED	hemoglobin antagonist, adenosine receptor antagonist	ADORA2A, HBA1	135, 3039	SIGNATURE_DOWN	Homo sapiens	IN_VITRO
mefloquine	4046	mefloquine inhibits Monocyte stimulated with Muramyl Dipeptide compared to Monocyte stimulated with Muramyl Dipeptide and M. tuberculosis	Monocyte	CL:0000576	Monocyte	CL:0000576	Monocyte	CL:0000576	Monocyte	CL:0000576	GSE34156_NOD2_LIGAND_VS_NOD2_AND_TLR1_TLR2_LIGAND_6H_TREATED_MONOCYTE	0.024169484		-96.21409922	0.63611947	APPROVED	hemoglobin antagonist, adenosine receptor antagonist	ADORA2A, HBA1	135, 3039	SIGNATURE_UP	Homo sapiens	IN_VITRO
mefloquine	4046	mefloquine inhibits Monocyte compared to Monocyte stimulated with M. tuberculosis	Monocyte	CL:0000576	Monocyte	CL:0000576	Monocyte	CL:0000576	Monocyte	CL:0000576	GSE8921_UNSTIM_0H_VS_TLR1_2_STIM_MONOCYTE_6H	0.034595992	0.039508652	-96.41255605	0.63611947	APPROVED	hemoglobin antagonist, adenosine receptor antagonist	ADORA2A, HBA1	135, 3039	SIGNATURE	Homo sapiens	IN_VITRO
mefloquine	4046	mefloquine inhibits Monocyte stimulated with Muramyl Dipeptide compared to Monocyte stimulated with Muramyl Dipeptide and M. tuberculosis	Monocyte	CL:0000576	Monocyte	CL:0000576	Monocyte	CL:0000576	Monocyte	CL:0000576	GSE34156_NOD2_LIGAND_VS_NOD2_AND_TLR1_TLR2_LIGAND_6H_TREATED_MONOCYTE	0.025492303		-97.23983588	0.63611947	APPROVED	hemoglobin antagonist, adenosine receptor antagonist	ADORA2A, HBA1	135, 3039	SIGNATURE_UP	Homo sapiens	IN_VITRO
mefloquine	4046	mefloquine inhibits Monocyte stimulated with CSF1 compared to Monocyte	Monocyte	CL:0000576	Monocyte	CL:0000576	Monocyte	CL:0000576	Monocyte	CL:0000576	GSE5099_UNSTIM_VS_MCSF_TREATED_MONOCYTE_DAY7		0.025492303	-98.28422231	0.63611947	APPROVED	hemoglobin antagonist, adenosine receptor antagonist	ADORA2A, HBA1	135, 3039	SIGNATURE_DOWN	Homo sapiens	IN_VITRO
mefloquine	4046	mefloquine inhibits Monocyte stimulated with Muramyl Dipeptide compared to Monocyte stimulated with M. tuberculosis	Monocyte	CL:0000576	Monocyte	CL:0000576	Monocyte	CL:0000576	Monocyte	CL:0000576	GSE34156_NOD2_LIGAND_VS_TLR1_TLR2_LIGAND_6H_TREATED_MONOCYTE	0.464371535	0.085539715	-99.58893871	0.63611947	APPROVED	hemoglobin antagonist, adenosine receptor antagonist	ADORA2A, HBA1	135, 3039	SIGNATURE	Homo sapiens	IN_VITRO
mefloquine	4046	mefloquine inhibits Neutrophil stimulated with HL60 lysate compared to Neutrophil stimulated with A.phagocytophilum	Neutrophil	CL:0000775	Neutrophil	CL:0000775	Neutrophil	CL:0000775	Neutrophil	CL:0000775	GSE2405_HEAT_KILLED_VS_LIVE_A_PHAGOCYTOPHILUM_STIM_NEUTROPHIL_9H	0.111497856	0.386082189	-95.14200299	0.63611947	APPROVED	hemoglobin antagonist, adenosine receptor antagonist	ADORA2A, HBA1	135, 3039	SIGNATURE	Homo sapiens	EX_VIVO
mefloquine	4046	mefloquine inhibits Neutrophil stimulated with F.tularensis (12 hours) compared to Neutrophil stimulated with F.tularensis (24 hours)	Neutrophil	CL:0000775	Neutrophil	CL:0000775	Neutrophil	CL:0000775	Neutrophil	CL:0000775	GSE37416_12H_VS_24H_F_TULARENSIS_LVS_NEUTROPHIL	0.813036873	0.02765377	-95.25411061	0.63611947	APPROVED	hemoglobin antagonist, adenosine receptor antagonist	ADORA2A, HBA1	135, 3039	SIGNATURE	Homo sapiens	IN_VITRO
mefloquine	4046	mefloquine inhibits Neutrophil compared to Neutrophil stimulated with LPS	Neutrophil	CL:0000775	Neutrophil	CL:0000775	Neutrophil	CL:0000775	Neutrophil	CL:0000775	GSE22103_UNSTIM_VS_LPS_STIM_NEUTROPHIL	0.440975551	0.108851967	-95.59043348	0.63611947	APPROVED	hemoglobin antagonist, adenosine receptor antagonist	ADORA2A, HBA1	135, 3039	SIGNATURE	Homo sapiens	IN_VIVO
mefloquine	4046	mefloquine inhibits Neutrophil compared to Neutrophil stimulated with A.phagocytophilum	Neutrophil	CL:0000775	Neutrophil	CL:0000775	Neutrophil	CL:0000775	Neutrophil	CL:0000775	GSE2405_0H_VS_3H_A_PHAGOCYTOPHILUM_STIM_NEUTROPHIL	0.709156739	0.25963086	-95.81464873	0.63611947	APPROVED	hemoglobin antagonist, adenosine receptor antagonist	ADORA2A, HBA1	135, 3039	SIGNATURE	Homo sapiens	EX_VIVO
mefloquine	4046	mefloquine inhibits Neutrophil compared to Neutrophil stimulated with F.tularensis	Neutrophil	CL:0000775	Neutrophil	CL:0000775	Neutrophil	CL:0000775	Neutrophil	CL:0000775	GSE37416_CTRL_VS_0H_F_TULARENSIS_LVS_NEUTROPHIL	0.055249017		-95.99030213	0.63611947	APPROVED	hemoglobin antagonist, adenosine receptor antagonist	ADORA2A, HBA1	135, 3039	SIGNATURE_UP	Homo sapiens	IN_VITRO
mefloquine	4046	mefloquine inhibits Neutrophil stimulated with HL60 lysate compared to Neutrophil stimulated with A.phagocytophilum	Neutrophil	CL:0000775	Neutrophil	CL:0000775	Neutrophil	CL:0000775	Neutrophil	CL:0000775	GSE2405_HEAT_KILLED_VS_LIVE_A_PHAGOCYTOPHILUM_STIM_NEUTROPHIL_9H	0.129429404	0.506603899	-96.11360239	0.63611947	APPROVED	hemoglobin antagonist, adenosine receptor antagonist	ADORA2A, HBA1	135, 3039	SIGNATURE	Homo sapiens	EX_VIVO
mefloquine	4046	mefloquine inhibits PBMC stimulated with gram negative bacteria compared to PBMC stimulated with gram positive bacteria	PBMC	CL:2000001	PBMC	CL:2000001	PBMC	CL:2000001	PBMC	CL:2000001	GSE9960_GRAM_NEG_VS_GRAM_POS_SEPSIS_PBMC	0.676802781	0.059434968	-95.14200299	0.63611947	APPROVED	hemoglobin antagonist, adenosine receptor antagonist	ADORA2A, HBA1	135, 3039	SIGNATURE	Homo sapiens	PATIENT
mefloquine	4046	mefloquine inhibits PBMC compared to PBMC in Lupus erythematosus	PBMC	CL:2000001	PBMC	CL:2000001	PBMC	CL:2000001	PBMC	CL:2000001	GSE24706_SLE_GPL6884_PBMCs		0.045238892	-95.48675867	0.63611947	APPROVED	hemoglobin antagonist, adenosine receptor antagonist	ADORA2A, HBA1	135, 3039	SIGNATURE_DOWN	Homo sapiens	PATIENT
mefloquine	4046	mefloquine inhibits PBMC compared to PBMC stimulated with CSF3	PBMC	CL:2000001	PBMC	CL:2000001	PBMC	CL:2000001	PBMC	CL:2000001	GSE7400_CTRL_VS_CSF3_IN_VIVO_TREATED_PBMC	0.031552139	0.280916644	-95.6651719	0.63611947	APPROVED	hemoglobin antagonist, adenosine receptor antagonist	ADORA2A, HBA1	135, 3039	SIGNATURE	Homo sapiens	IN_VIVO
mefloquine	4046	mefloquine inhibits PBMC stimulated with Influenza compared to PBMC stimulated with S.aureus	PBMC	CL:2000001	PBMC	CL:2000001	PBMC	CL:2000001	PBMC	CL:2000001	GSE6269_FLU_VS_STAPH_AUREUS_INF_PBMC	0.18641712	0.02765377	-95.88938714	0.63611947	APPROVED	hemoglobin antagonist, adenosine receptor antagonist	ADORA2A, HBA1	135, 3039	SIGNATURE	Homo sapiens	PATIENT
mefloquine	4046	mefloquine inhibits PBMC compared to PBMC stimulated with S.pneumo	PBMC	CL:2000001	PBMC	CL:2000001	PBMC	CL:2000001	PBMC	CL:2000001	GSE6269_HEALTHY_VS_STAPH_PNEUMO_INF_PBMC	0.674666656	0.024138553	-95.96412556	0.63611947	APPROVED	hemoglobin antagonist, adenosine receptor antagonist	ADORA2A, HBA1	135, 3039	SIGNATURE	Homo sapiens	PATIENT
mefloquine	4046	mefloquine inhibits PBMC compared to PBMC stimulated with IFNa	PBMC	CL:2000001	PBMC	CL:2000001	PBMC	CL:2000001	PBMC	CL:2000001	GSE14386_UNTREATED_VS_IFNA_TREATED_ACT_PBMC_MS_PATIENT	0.039707342		-95.97165237	0.63611947	APPROVED	hemoglobin antagonist, adenosine receptor antagonist	ADORA2A, HBA1	135, 3039	SIGNATURE_UP	Homo sapiens	PATIENT
mefloquine	4046	mefloquine inhibits PBMC compared to PBMC stimulated with IFNa	PBMC	CL:2000001	PBMC	CL:2000001	PBMC	CL:2000001	PBMC	CL:2000001	GSE14386_UNTREATED_VS_IFNA_TREATED_ACT_PBMC_MS_PATIENT	0.052211323	0.818061683	-96.44992526	0.63611947	APPROVED	hemoglobin antagonist, adenosine receptor antagonist	ADORA2A, HBA1	135, 3039	SIGNATURE	Homo sapiens	PATIENT
mefloquine	4046	mefloquine inhibits PBMC in Diabetes type 1 compared to PBMC in Diabetes (month 0)	PBMC	CL:2000001	PBMC	CL:2000001	PBMC	CL:2000001	PBMC	CL:2000001	GSE9006_TYPE_1_VS_TYPE_2_DIABETES_PBMC_AT_DX	0.025492303		-97.22118612	0.63611947	APPROVED	hemoglobin antagonist, adenosine receptor antagonist	ADORA2A, HBA1	135, 3039	SIGNATURE_UP	Homo sapiens	IN_VIVO
mefloquine	4046	mefloquine inhibits PBMC compared to PBMC stimulated with S.pneumo	PBMC	CL:2000001	PBMC	CL:2000001	PBMC	CL:2000001	PBMC	CL:2000001	GSE6269_HEALTHY_VS_STAPH_PNEUMO_INF_PBMC	0.499497	0.027530864	-97.23467862	0.63611947	APPROVED	hemoglobin antagonist, adenosine receptor antagonist	ADORA2A, HBA1	135, 3039	SIGNATURE	Homo sapiens	PATIENT
mefloquine	4046	mefloquine inhibits PBMC in Sj枚gren syndrome compared to PBMC	PBMC	CL:2000001	PBMC	CL:2000001	PBMC	CL:2000001	PBMC	CL:2000001	GSE51092_SjS_GPL6884_PBMCs	0.044160359	0.206290472	-97.98206278	0.63611947	APPROVED	hemoglobin antagonist, adenosine receptor antagonist	ADORA2A, HBA1	135, 3039	SIGNATURE	Homo sapiens	PATIENT
mefloquine	4046	mefloquine inhibits PBMC in Sj枚gren syndrome compared to PBMC	PBMC	CL:2000001	PBMC	CL:2000001	PBMC	CL:2000001	PBMC	CL:2000001	GSE51092_SjS_GPL6884_PBMCs	0.034595992	0.148521521	-98.13153961	0.63611947	APPROVED	hemoglobin antagonist, adenosine receptor antagonist	ADORA2A, HBA1	135, 3039	SIGNATURE	Homo sapiens	PATIENT
mefloquine	4046	mefloquine inhibits PBMC stimulated with Influenza compared to PBMC stimulated with S.aureus	PBMC	CL:2000001	PBMC	CL:2000001	PBMC	CL:2000001	PBMC	CL:2000001	GSE6269_FLU_VS_STAPH_AUREUS_INF_PBMC	0.401169024	0.024138553	-98.91629297	0.63611947	APPROVED	hemoglobin antagonist, adenosine receptor antagonist	ADORA2A, HBA1	135, 3039	SIGNATURE	Homo sapiens	PATIENT
mefloquine	4046	mefloquine inhibits PBMC stimulated with Influenza compared to PBMC stimulated with S.aureus	PBMC	CL:2000001	PBMC	CL:2000001	PBMC	CL:2000001	PBMC	CL:2000001	GSE6269_FLU_VS_STAPH_AUREUS_INF_PBMC	0.292278298	0.027530864	-98.91629297	0.63611947	APPROVED	hemoglobin antagonist, adenosine receptor antagonist	ADORA2A, HBA1	135, 3039	SIGNATURE	Homo sapiens	PATIENT
mefloquine	4046	mefloquine inhibits PBMC in Lupus erythematosus compared to PBMC	PBMC	CL:2000001	PBMC	CL:2000001	PBMC	CL:2000001	PBMC	CL:2000001	GSE11907_SLE_GPL97_PBMCs	0.460448558	0.114151426	-99.47683109	0.63611947	APPROVED	hemoglobin antagonist, adenosine receptor antagonist	ADORA2A, HBA1	135, 3039	SIGNATURE	Homo sapiens	PATIENT
mefloquine	4046	mefloquine inhibits PBMC in Diabetes type 1 compared to PBMC in Diabetes (month 0)	PBMC	CL:2000001	PBMC	CL:2000001	PBMC	CL:2000001	PBMC	CL:2000001	GSE9006_TYPE_1_VS_TYPE_2_DIABETES_PBMC_AT_DX	0.031552139	0.02765377	-99.66367713	0.63611947	APPROVED	hemoglobin antagonist, adenosine receptor antagonist	ADORA2A, HBA1	135, 3039	SIGNATURE	Homo sapiens	IN_VIVO
mefloquine	4046	mefloquine inhibits CD25+ T regulatory stimulated with IL4 compared to CD25- T cell stimulated with IL4	T cell	CL:0000084	T regulatory	CL:0000084	T cell	CL:0000815	T cell	CL:0000084	GSE24634_TREG_VS_TCONV_POST_DAY7_IL4_CONVERSION	0.025492303		-95.11376352	0.63611947	APPROVED	hemoglobin antagonist, adenosine receptor antagonist	ADORA2A, HBA1	135, 3039	SIGNATURE_UP	Homo sapiens	EX_VIVO
mefloquine	4046	mefloquine inhibits T CD8+ compared to T CD8+ stimulated with IFNa5, CD28 and anti-CD3	T cell	CL:0000084	T CD8+	CL:0000084	T cell	CL:0002437	T CD8+	CL:0002437	GSE17301_CTRL_VS_48H_ACD3_ACD28_IFNA5_STIM_CD8_TCELL	0.576345076	0.765422148	-95.21674141	0.63611947	APPROVED	hemoglobin antagonist, adenosine receptor antagonist	ADORA2A, HBA1	135, 3039	SIGNATURE	Homo sapiens	IN_VITRO
mefloquine	4046	mefloquine inhibits T helper stimulated with IL12, anti-CD3 and anti-CD28 compared to T helper stimulated with IL4, anti-CD3 and anti-CD28	T cell	CL:0000084	T helper	CL:0000084	T cell	CL:0000492	T helper	CL:0000492	GSE2770_IL12_VS_IL4_TREATED_ACT_CD4_TCELL_6H	0.36055371	0.329032168	-95.36621824	0.63611947	APPROVED	hemoglobin antagonist, adenosine receptor antagonist	ADORA2A, HBA1	135, 3039	SIGNATURE	Homo sapiens	EX_VIVO
mefloquine	4046	mefloquine inhibits CD25+ T CD4+ effector compared to CD25- T cell	T cell	CL:0000084	T CD4+ effector	CL:0000084	T cell	CL:0001044	T cell	CL:0000084	GSE24634_TEFF_VS_TCONV_DAY3_IN_CULTURE	0.034595992	0.024138553	-95.47832586	0.63611947	APPROVED	hemoglobin antagonist, adenosine receptor antagonist	ADORA2A, HBA1	135, 3039	SIGNATURE	Homo sapiens	EX_VIVO
mefloquine	4046	mefloquine inhibits CD25+ T regulatory stimulated with IL4 compared to CD25- T cell stimulated with IL4	T cell	CL:0000084	T regulatory	CL:0000084	T cell	CL:0000815	T cell	CL:0000084	GSE24634_TREG_VS_TCONV_POST_DAY3_IL4_CONVERSION	0.024169484		-95.54270794	0.63611947	APPROVED	hemoglobin antagonist, adenosine receptor antagonist	ADORA2A, HBA1	135, 3039	SIGNATURE_UP	Homo sapiens	EX_VIVO
mefloquine	4046	mefloquine inhibits CD25+ T CD4+ effector compared to CD25- T cell	T cell	CL:0000084	T CD4+ effector	CL:0000084	T cell	CL:0001044	T cell	CL:0000084	GSE24634_TEFF_VS_TCONV_DAY5_IN_CULTURE	0.025492303		-95.82245431	0.63611947	APPROVED	hemoglobin antagonist, adenosine receptor antagonist	ADORA2A, HBA1	135, 3039	SIGNATURE_UP	Homo sapiens	EX_VIVO
mefloquine	4046	mefloquine inhibits T cell stimulated with TNF compared to T regulatory stimulated with TNF	T cell	CL:0000084	T cell	CL:0000084	T cell	CL:0000084	T regulatory	CL:0000815	GSE18893_TCONV_VS_TREG_24H_TNF_STIM	0.025492303		-96.15814994	0.63611947	APPROVED	hemoglobin antagonist, adenosine receptor antagonist	ADORA2A, HBA1	135, 3039	SIGNATURE_UP	Homo sapiens	IN_VITRO
mefloquine	4046	mefloquine inhibits CD25+ T regulatory stimulated with IL4 compared to CD25- T cell stimulated with IL4	T cell	CL:0000084	T regulatory	CL:0000084	T cell	CL:0000815	T cell	CL:0000084	GSE24634_TREG_VS_TCONV_POST_DAY5_IL4_CONVERSION	0.024169484		-96.19544946	0.63611947	APPROVED	hemoglobin antagonist, adenosine receptor antagonist	ADORA2A, HBA1	135, 3039	SIGNATURE_UP	Homo sapiens	EX_VIVO
mefloquine	4046	mefloquine inhibits activated T CD4+ compared to NK cell	T cell	CL:0000084	T CD4+	CL:0000623	NK cell	CL:0000624	NK cell	CL:0000623	GSE28726_ACT_CD4_TCELL_VS_ACT_NKTCELL	0.041656937	0.06383131	-96.41255605	0.63611947	APPROVED	hemoglobin antagonist, adenosine receptor antagonist	ADORA2A, HBA1	135, 3039	SIGNATURE	Homo sapiens	IN_VITRO
mefloquine	4046	mefloquine inhibits CD45RA+ T regulatory compared to CD45RA- T CD4+	T cell	CL:0000084	T CD4+	CL:0000084	T cell	CL:0000624	T regulatory	CL:0000815	GSE15659_CD45RA_NEG_CD4_TCELL_VS_RESTING_TREG		0.065175641	-96.41924655	0.63611947	APPROVED	hemoglobin antagonist, adenosine receptor antagonist	ADORA2A, HBA1	135, 3039	SIGNATURE_DOWN	Homo sapiens	UNKNOWN
mefloquine	4046	mefloquine inhibits T CD4+ stimulated with IL4 and anti-IL12 compared to T CD4+	T cell	CL:0000084	T CD4+	CL:0000084	T cell	CL:0000624	T CD4+	CL:0000624	GSE17974_CTRL_VS_ACT_IL4_AND_ANTI_IL12_24H_CD4_TCELL		0.025492303	-96.54979485	0.63611947	APPROVED	hemoglobin antagonist, adenosine receptor antagonist	ADORA2A, HBA1	135, 3039	SIGNATURE_DOWN	Homo sapiens	EX_VIVO
mefloquine	4046	mefloquine inhibits VD2 T cell gamma/delta compared to VD2 T cell gamma/delta stimulated with PMA and ionomycin	T cell	CL:0000084	T cell gamma/delta	CL:0000084	T cell	CL:0000798	T cell gamma/delta	CL:0000798	GSE3720_UNSTIM_VS_PMA_STIM_VD2_GAMMADELTA_TCELL	0.025492303		-96.62439388	0.63611947	APPROVED	hemoglobin antagonist, adenosine receptor antagonist	ADORA2A, HBA1	135, 3039	SIGNATURE_UP	Homo sapiens	IN_VIVO
mefloquine	4046	mefloquine inhibits T CD4+ na茂ve compared to PBMC	T cell	CL:0000084	T CD4+ na茂ve	CL:2000001	PBMC	CL:0000895	PBMC	CL:2000001	GSE11057_NAIVE_CD4_VS_PBMC_CD4_TCELL	0.228648154	0.027530864	-96.86098655	0.63611947	APPROVED	hemoglobin antagonist, adenosine receptor antagonist	ADORA2A, HBA1	135, 3039	SIGNATURE	Homo sapiens	IN_VIVO
mefloquine	4046	mefloquine inhibits T CD4+ stimulated with IL4 and anti-IL12 compared to T CD4+	T cell	CL:0000084	T CD4+	CL:0000084	T cell	CL:0000624	T CD4+	CL:0000624	GSE17974_CTRL_VS_ACT_IL4_AND_ANTI_IL12_4H_CD4_TCELL		0.032275928	-96.86684073	0.63611947	APPROVED	hemoglobin antagonist, adenosine receptor antagonist	ADORA2A, HBA1	135, 3039	SIGNATURE_DOWN	Homo sapiens	EX_VIVO
mefloquine	4046	mefloquine inhibits T CD4+ stimulated with cultured (24 hours) compared to T CD4+ stimulated with cultured (0 hours)	T cell	CL:0000084	T CD4+	CL:0000084	T cell	CL:0000624	T CD4+	CL:0000624	GSE17974_0H_VS_24H_IN_VITRO_ACT_CD4_TCELL		0.024169484	-96.90414025	0.63611947	APPROVED	hemoglobin antagonist, adenosine receptor antagonist	ADORA2A, HBA1	135, 3039	SIGNATURE_DOWN	Homo sapiens	EX_VIVO
mefloquine	4046	mefloquine inhibits PD-1 (high) T CD8+ compared to PD-1 (low) T CD8+	T cell	CL:0000084	T CD8+	CL:0000084	T cell	CL:0002437	T CD8+	CL:0002437	GSE26495_PD1HIGH_VS_PD1LOW_CD8_TCELL	0.755863326	0.027530864	-96.97309417	0.63611947	APPROVED	hemoglobin antagonist, adenosine receptor antagonist	ADORA2A, HBA1	135, 3039	SIGNATURE	Homo sapiens	IN_VIVO
mefloquine	4046	mefloquine inhibits T CD4+ na茂ve compared to PBMC	T cell	CL:0000084	T CD4+ na茂ve	CL:2000001	PBMC	CL:0000895	PBMC	CL:2000001	GSE11057_NAIVE_CD4_VS_PBMC_CD4_TCELL	0.30323328	0.024138553	-97.19730942	0.63611947	APPROVED	hemoglobin antagonist, adenosine receptor antagonist	ADORA2A, HBA1	135, 3039	SIGNATURE	Homo sapiens	IN_VIVO
mefloquine	4046	mefloquine inhibits CD25+ T regulatory stimulated with IL4 compared to CD25- T cell stimulated with IL4	T cell	CL:0000084	T regulatory	CL:0000084	T cell	CL:0000815	T cell	CL:0000084	GSE24634_TREG_VS_TCONV_POST_DAY3_IL4_CONVERSION	0.025492303		-97.25848564	0.63611947	APPROVED	hemoglobin antagonist, adenosine receptor antagonist	ADORA2A, HBA1	135, 3039	SIGNATURE_UP	Homo sapiens	EX_VIVO
mefloquine	4046	mefloquine inhibits CD25+ T CD4+ effector compared to CD25- T cell	T cell	CL:0000084	T CD4+ effector	CL:0000084	T cell	CL:0001044	T cell	CL:0000084	GSE24634_TEFF_VS_TCONV_DAY3_IN_CULTURE	0.041656937	0.027530864	-97.34678625	0.63611947	APPROVED	hemoglobin antagonist, adenosine receptor antagonist	ADORA2A, HBA1	135, 3039	SIGNATURE	Homo sapiens	EX_VIVO
mefloquine	4046	mefloquine inhibits young T CD4+ memory stimulated with TSST compared to young T CD4+ memory	T cell	CL:0000084	T CD4+ memory	CL:0000084	T cell	CL:0000897	T CD4+ memory	CL:0000897	GSE36476_CTRL_VS_TSST_ACT_72H_MEMORY_CD4_TCELL_YOUNG		0.025492303	-97.37038419	0.63611947	APPROVED	hemoglobin antagonist, adenosine receptor antagonist	ADORA2A, HBA1	135, 3039	SIGNATURE_DOWN	Homo sapiens	EX_VIVO
mefloquine	4046	mefloquine inhibits T CD8+ na茂ve compared to T CD8+ memory	T cell	CL:0000084	T CD8+ memory	CL:0000084	T cell	CL:0000909	T CD8+ na茂ve	CL:0000898	GSE23321_EFFECTOR_MEMORY_VS_NAIVE_CD8_TCELL		0.025492303	-97.38903394	0.63611947	APPROVED	hemoglobin antagonist, adenosine receptor antagonist	ADORA2A, HBA1	135, 3039	SIGNATURE_DOWN	Homo sapiens	IN_VIVO
mefloquine	4046	mefloquine inhibits stem T CD8+ memory compared to T CD8+ na茂ve	T cell	CL:0000084	T CD8+ memory	CL:0000084	T cell	CL:0000909	T CD8+ na茂ve	CL:0000898	GSE23321_CD8_STEM_CELL_MEMORY_VS_NAIVE_CD8_TCELL	0.151586653	0.05652526	-97.75784753	0.63611947	APPROVED	hemoglobin antagonist, adenosine receptor antagonist	ADORA2A, HBA1	135, 3039	SIGNATURE	Homo sapiens	IN_VIVO
mefloquine	4046	mefloquine inhibits stem T CD8+ memory compared to T CD8+ na茂ve	T cell	CL:0000084	T CD8+ memory	CL:0000084	T cell	CL:0000909	T CD8+ na茂ve	CL:0000898	GSE23321_CD8_STEM_CELL_MEMORY_VS_NAIVE_CD8_TCELL	0.031552139	0.34272541	-97.79521674	0.63611947	APPROVED	hemoglobin antagonist, adenosine receptor antagonist	ADORA2A, HBA1	135, 3039	SIGNATURE	Homo sapiens	IN_VIVO
mefloquine	4046	mefloquine inhibits CD25+ T CD4+ effector compared to CD25- T cell	T cell	CL:0000084	T CD4+ effector	CL:0000084	T cell	CL:0001044	T cell	CL:0000084	GSE24634_TEFF_VS_TCONV_DAY3_IN_CULTURE	0.032275928		-97.81797837	0.63611947	APPROVED	hemoglobin antagonist, adenosine receptor antagonist	ADORA2A, HBA1	135, 3039	SIGNATURE_UP	Homo sapiens	EX_VIVO
mefloquine	4046	mefloquine inhibits T CD4+ stimulated with IL4 and anti-IL12 compared to T CD4+	T cell	CL:0000084	T CD4+	CL:0000084	T cell	CL:0000624	T CD4+	CL:0000624	GSE17974_CTRL_VS_ACT_IL4_AND_ANTI_IL12_6H_CD4_TCELL		0.025492303	-97.87392764	0.63611947	APPROVED	hemoglobin antagonist, adenosine receptor antagonist	ADORA2A, HBA1	135, 3039	SIGNATURE_DOWN	Homo sapiens	EX_VIVO
mefloquine	4046	mefloquine inhibits T CD4+ stimulated with cultured (4 hours) compared to T CD4+ stimulated with cultured (0 hours)	T cell	CL:0000084	T CD4+	CL:0000084	T cell	CL:0000624	T CD4+	CL:0000624	GSE17974_0H_VS_4H_IN_VITRO_ACT_CD4_TCELL		0.025492303	-97.92987691	0.63611947	APPROVED	hemoglobin antagonist, adenosine receptor antagonist	ADORA2A, HBA1	135, 3039	SIGNATURE_DOWN	Homo sapiens	EX_VIVO
mefloquine	4046	mefloquine inhibits T CD8+ stimulated with Overexpression (KLBR1) compared to T CD8+ stimulated with Downexpression [KLBR1]	T cell	CL:0000084	T CD8+	CL:0000084	T cell	CL:0002437	T CD8+	CL:0002437	GSE33425_CD161_HIGH_VS_NEG_CD8_TCELL	0.064275935	0.02765377	-98.35575486	0.63611947	APPROVED	hemoglobin antagonist, adenosine receptor antagonist	ADORA2A, HBA1	135, 3039	SIGNATURE	Homo sapiens	IN_VIVO
mefloquine	4046	mefloquine inhibits CD25+ T regulatory stimulated with IL4 compared to CD25- T cell stimulated with IL4	T cell	CL:0000084	T regulatory	CL:0000084	T cell	CL:0000815	T cell	CL:0000084	GSE24634_TREG_VS_TCONV_POST_DAY5_IL4_CONVERSION	0.025492303		-98.54531891	0.63611947	APPROVED	hemoglobin antagonist, adenosine receptor antagonist	ADORA2A, HBA1	135, 3039	SIGNATURE_UP	Homo sapiens	EX_VIVO
mefloquine	4046	mefloquine inhibits CD25+ T CD4+ effector compared to CD25- T cell	T cell	CL:0000084	T CD4+ effector	CL:0000084	T cell	CL:0001044	T cell	CL:0000084	GSE24634_TEFF_VS_TCONV_DAY3_IN_CULTURE	0.024169484		-98.56396867	0.63611947	APPROVED	hemoglobin antagonist, adenosine receptor antagonist	ADORA2A, HBA1	135, 3039	SIGNATURE_UP	Homo sapiens	EX_VIVO
mefloquine	4046	mefloquine inhibits CD25+ T CD4+ effector compared to CD25- T cell	T cell	CL:0000084	T CD4+ effector	CL:0000084	T cell	CL:0001044	T cell	CL:0000084	GSE24634_TEFF_VS_TCONV_DAY3_IN_CULTURE	0.025492303		-98.8996643	0.63611947	APPROVED	hemoglobin antagonist, adenosine receptor antagonist	ADORA2A, HBA1	135, 3039	SIGNATURE_UP	Homo sapiens	EX_VIVO
mefloquine	4046	mefloquine inhibits T helper 1 stimulated with IL12 compared to T helper 1 stimulated with IFNa	T cell	CL:0000084	T helper 1	CL:0000084	T cell	CL:0000545	T helper 1	CL:0000545	GSE20198_IL12_VS_IFNA_TREATED_ACT_CD4_TCELL	0.1248408	0.653839106	-98.95366218	0.63611947	APPROVED	hemoglobin antagonist, adenosine receptor antagonist	ADORA2A, HBA1	135, 3039	SIGNATURE	Homo sapiens	IN_VITRO
mefloquine	4046	mefloquine inhibits T helper 1 stimulated with IL12 compared to T helper 1 stimulated with IFNa	T cell	CL:0000084	T helper 1	CL:0000084	T cell	CL:0000545	T helper 1	CL:0000545	GSE20198_IL12_VS_IFNA_TREATED_ACT_CD4_TCELL	0.58085522	0.083329441	-99.14050822	0.63611947	APPROVED	hemoglobin antagonist, adenosine receptor antagonist	ADORA2A, HBA1	135, 3039	SIGNATURE	Homo sapiens	IN_VITRO
mefloquine	4046	mefloquine inhibits young T CD4+ memory stimulated with TSST compared to young T CD4+ memory	T cell	CL:0000084	T CD4+ memory	CL:0000084	T cell	CL:0000897	T CD4+ memory	CL:0000897	GSE36476_CTRL_VS_TSST_ACT_40H_MEMORY_CD4_TCELL_YOUNG		0.025492303	-99.32860873	0.63611947	APPROVED	hemoglobin antagonist, adenosine receptor antagonist	ADORA2A, HBA1	135, 3039	SIGNATURE_DOWN	Homo sapiens	EX_VIVO
mefloquine	4046	mefloquine inhibits T CD4+ stimulated with cultured (24 hours) compared to T CD4+ stimulated with cultured (0 hours)	T cell	CL:0000084	T CD4+	CL:0000084	T cell	CL:0000624	T CD4+	CL:0000624	GSE17974_0H_VS_24H_IN_VITRO_ACT_CD4_TCELL		0.025492303	-99.40320776	0.63611947	APPROVED	hemoglobin antagonist, adenosine receptor antagonist	ADORA2A, HBA1	135, 3039	SIGNATURE_DOWN	Homo sapiens	EX_VIVO
mefloquine	4046	mefloquine inhibits T helper 1 stimulated with IL12 compared to T helper 1 stimulated with IFNa	T cell	CL:0000084	T helper 1	CL:0000084	T cell	CL:0000545	T helper 1	CL:0000545	GSE20198_IL12_VS_IFNA_TREATED_ACT_CD4_TCELL	0.296996824	0.137884629	-99.43946188	0.63611947	APPROVED	hemoglobin antagonist, adenosine receptor antagonist	ADORA2A, HBA1	135, 3039	SIGNATURE	Homo sapiens	IN_VITRO
cyclosporin-a		cyclosporin-a inhibits T helper 1 compared to B cell	B cell	CL:0000236	B cell	CL:0000084	T cell	CL:0000236	T helper 1	CL:0000545	GSE3982_BCELL_VS_TH1		0.013699855	-95.00186498	0.645873112	APPROVED	calcineurin inhibitor	PPP3CA	5530	SIGNATURE_DOWN	Homo sapiens	UNKNOWN
cyclosporin-a		cyclosporin-a inhibits small pre-B2 B cell compared to large pre-B2 B cell	B cell	CL:0000236	B cell	CL:0000236	B cell	CL:0000236	B cell	CL:0000236	GSE4590_SMALL_VS_LARGE_PRE_BCELL	0.655490155	0.026924644	-95.06726457	0.645873112	APPROVED	calcineurin inhibitor	PPP3CA	5530	SIGNATURE	Homo sapiens	PATIENT
cyclosporin-a		cyclosporin-a inhibits B cell compared to B cell memory	B cell	CL:0000236	B cell	CL:0000236	B cell	CL:0000236	B cell memory	CL:0000787	GSE12366_GC_VS_MEMORY_BCELL	0.011451558	0.026747161	-95.21674141	0.645873112	APPROVED	calcineurin inhibitor	PPP3CA	5530	SIGNATURE	Homo sapiens	PATIENT
cyclosporin-a		cyclosporin-a inhibits B cell compared to Plasma cell	B cell	CL:0000236	B cell	CL:0000236	B cell	CL:0000236	Plasma cell	CL:0000786	GSE12366_GC_BCELL_VS_PLASMA_CELL	0.013699855		-95.24431182	0.645873112	APPROVED	calcineurin inhibitor	PPP3CA	5530	SIGNATURE_UP	Homo sapiens	PATIENT
cyclosporin-a		cyclosporin-a inhibits B cell compared to Plasma cell	B cell	CL:0000236	B cell	CL:0000236	B cell	CL:0000236	Plasma cell	CL:0000786	GSE12366_GC_BCELL_VS_PLASMA_CELL	0.013749423		-95.33756061	0.645873112	APPROVED	calcineurin inhibitor	PPP3CA	5530	SIGNATURE_UP	Homo sapiens	PATIENT
cyclosporin-a		cyclosporin-a inhibits IgG IgA B cell memory compared to Plasma cell	B cell	CL:0000236	B cell memory	CL:0000236	B cell	CL:0000787	Plasma cell	CL:0000786	GSE22886_IGG_IGA_MEMORY_BCELL_VS_BM_PLASMA_CELL	0.018653809		-95.80380455	0.645873112	APPROVED	calcineurin inhibitor	PPP3CA	5530	SIGNATURE_UP	Homo sapiens	IN_SILICO
cyclosporin-a		cyclosporin-a inhibits IgM B cell memory compared to Plasma cell	B cell	CL:0000236	B cell memory	CL:0000236	B cell	CL:0000787	Plasma cell	CL:0000786	GSE13411_IGM_MEMORY_BCELL_VS_PLASMA_CELL	0.29325224	0.017029834	-95.88938714	0.645873112	APPROVED	calcineurin inhibitor	PPP3CA	5530	SIGNATURE	Homo sapiens	EX_VIVO
cyclosporin-a		cyclosporin-a inhibits T helper 2 compared to B cell	B cell	CL:0000236	B cell	CL:0000084	T cell	CL:0000236	T helper 2	CL:0000546	GSE3982_BCELL_VS_TH2		0.012270921	-96.06490116	0.645873112	APPROVED	calcineurin inhibitor	PPP3CA	5530	SIGNATURE_DOWN	Homo sapiens	UNKNOWN
cyclosporin-a		cyclosporin-a inhibits T helper 2 compared to B cell	B cell	CL:0000236	B cell	CL:0000084	T cell	CL:0000236	T helper 2	CL:0000546	GSE3982_BCELL_VS_TH2		0.024994406	-96.12085043	0.645873112	APPROVED	calcineurin inhibitor	PPP3CA	5530	SIGNATURE_DOWN	Homo sapiens	UNKNOWN
cyclosporin-a		cyclosporin-a inhibits B cell compared to B cell memory	B cell	CL:0000236	B cell	CL:0000236	B cell	CL:0000236	B cell memory	CL:0000787	GSE12366_GC_VS_MEMORY_BCELL	0.013699855		-96.27004849	0.645873112	APPROVED	calcineurin inhibitor	PPP3CA	5530	SIGNATURE_UP	Homo sapiens	PATIENT
cyclosporin-a		cyclosporin-a inhibits B cell compared to B cell memory	B cell	CL:0000236	B cell	CL:0000236	B cell	CL:0000236	B cell memory	CL:0000787	GSE12366_GC_VS_MEMORY_BCELL	0.013749423		-96.307348	0.645873112	APPROVED	calcineurin inhibitor	PPP3CA	5530	SIGNATURE_UP	Homo sapiens	PATIENT
cyclosporin-a		cyclosporin-a inhibits T helper 1 compared to B cell	B cell	CL:0000236	B cell	CL:0000084	T cell	CL:0000236	T helper 1	CL:0000545	GSE3982_BCELL_VS_TH1		0.018653809	-96.307348	0.645873112	APPROVED	calcineurin inhibitor	PPP3CA	5530	SIGNATURE_DOWN	Homo sapiens	UNKNOWN
cyclosporin-a		cyclosporin-a inhibits B cell compared to B cell memory	B cell	CL:0000236	B cell	CL:0000236	B cell	CL:0000236	B cell memory	CL:0000787	GSE12366_GC_VS_MEMORY_BCELL	0.013078284	0.013413534	-96.33781764	0.645873112	APPROVED	calcineurin inhibitor	PPP3CA	5530	SIGNATURE	Homo sapiens	PATIENT
cyclosporin-a		cyclosporin-a inhibits B cell compared to B cell na?ve	B cell	CL:0000236	B cell na?ve	CL:0000236	B cell	CL:0000788	B cell	CL:0000236	GSE12845_NAIVE_VS_PRE_GC_TONSIL_BCELL		0.012270921	-96.36329728	0.645873112	APPROVED	calcineurin inhibitor	PPP3CA	5530	SIGNATURE_DOWN	Homo sapiens	PATIENT
cyclosporin-a		cyclosporin-a inhibits B1 B cell compared to Plasmablast	B cell	CL:0000236	B cell		Other	CL:0000236	Plasmablast	CL:0000980	GSE42724_B1_BCELL_VS_PLASMABLAST	0.349722351	0.680698435	-96.41255605	0.645873112	APPROVED	calcineurin inhibitor	PPP3CA	5530	SIGNATURE	Homo sapiens	IN_VITRO
cyclosporin-a		cyclosporin-a inhibits T helper 1 compared to B cell	B cell	CL:0000236	B cell	CL:0000084	T cell	CL:0000236	T helper 1	CL:0000545	GSE3982_BCELL_VS_TH1		0.024994406	-96.45654606	0.645873112	APPROVED	calcineurin inhibitor	PPP3CA	5530	SIGNATURE_DOWN	Homo sapiens	UNKNOWN
cyclosporin-a		cyclosporin-a inhibits T helper 2 compared to B cell	B cell	CL:0000236	B cell	CL:0000084	T cell	CL:0000236	T helper 2	CL:0000546	GSE3982_BCELL_VS_TH2		0.013749423	-96.68034316	0.645873112	APPROVED	calcineurin inhibitor	PPP3CA	5530	SIGNATURE_DOWN	Homo sapiens	UNKNOWN
cyclosporin-a		cyclosporin-a inhibits B cell compared to B cell na?ve	B cell	CL:0000236	B cell	CL:0000236	B cell	CL:0000236	B cell na?ve	CL:0000788	GSE12366_GC_VS_NAIVE_BCELL	0.012270921		-96.7922417	0.645873112	APPROVED	calcineurin inhibitor	PPP3CA	5530	SIGNATURE_UP	Homo sapiens	PATIENT
cyclosporin-a		cyclosporin-a inhibits T helper 2 compared to B cell	B cell	CL:0000236	B cell	CL:0000084	T cell	CL:0000236	T helper 2	CL:0000546	GSE3982_BCELL_VS_TH2		0.013699855	-96.81089146	0.645873112	APPROVED	calcineurin inhibitor	PPP3CA	5530	SIGNATURE_DOWN	Homo sapiens	UNKNOWN
cyclosporin-a		cyclosporin-a inhibits B cell compared to IgD- B B cell	B cell	CL:0000236	B cell	CL:0000236	B cell	CL:0000236	B cell	CL:0000236	GSE12845_IGD_NEG_BLOOD_VS_PRE_GC_TONSIL_BCELL		0.012270921	-96.88549049	0.645873112	APPROVED	calcineurin inhibitor	PPP3CA	5530	SIGNATURE_DOWN	Homo sapiens	PATIENT
cyclosporin-a		cyclosporin-a inhibits CD21 (low) B cell compared to B cell	B cell	CL:0000236	B cell	CL:0000236	B cell	CL:0000236	B cell	CL:0000236	GSE17186_BLOOD_VS_CORD_BLOOD_CD21LOW_TRANSITIONAL_BCELL	0.927071193	0.039008746	-97.04783259	0.645873112	APPROVED	calcineurin inhibitor	PPP3CA	5530	SIGNATURE	Homo sapiens	PATIENT
cyclosporin-a		cyclosporin-a inhibits IgG IgA B cell memory compared to Plasma cell	B cell	CL:0000236	B cell memory	CL:0000236	B cell	CL:0000787	Plasma cell	CL:0000786	GSE22886_IGG_IGA_MEMORY_BCELL_VS_BLOOD_PLASMA_CELL	0.917322054	0.017029834	-97.122571	0.645873112	APPROVED	calcineurin inhibitor	PPP3CA	5530	SIGNATURE	Homo sapiens	IN_SILICO
cyclosporin-a		cyclosporin-a inhibits B cell compared to Plasma cell	B cell	CL:0000236	B cell	CL:0000236	B cell	CL:0000236	Plasma cell	CL:0000786	GSE12366_GC_BCELL_VS_PLASMA_CELL	0.012270921		-97.38903394	0.645873112	APPROVED	calcineurin inhibitor	PPP3CA	5530	SIGNATURE_UP	Homo sapiens	PATIENT
cyclosporin-a		cyclosporin-a inhibits B cell compared to B cell memory	B cell	CL:0000236	B cell	CL:0000236	B cell	CL:0000236	B cell memory	CL:0000787	GSE12366_GC_VS_MEMORY_BCELL	0.012270921		-97.42633346	0.645873112	APPROVED	calcineurin inhibitor	PPP3CA	5530	SIGNATURE_UP	Homo sapiens	PATIENT
cyclosporin-a		cyclosporin-a inhibits IgM B cell memory compared to Plasma cell	B cell	CL:0000236	B cell memory	CL:0000236	B cell	CL:0000787	Plasma cell	CL:0000786	GSE22886_IGM_MEMORY_BCELL_VS_BM_PLASMA_CELL	0.018653809		-97.42633346	0.645873112	APPROVED	calcineurin inhibitor	PPP3CA	5530	SIGNATURE_UP	Homo sapiens	IN_SILICO
cyclosporin-a		cyclosporin-a inhibits B cell compared to B cell memory	B cell	CL:0000236	B cell	CL:0000236	B cell	CL:0000236	B cell memory	CL:0000787	GSE12366_GC_VS_MEMORY_BCELL	0.024994406		-97.50093249	0.645873112	APPROVED	calcineurin inhibitor	PPP3CA	5530	SIGNATURE_UP	Homo sapiens	PATIENT
cyclosporin-a		cyclosporin-a inhibits IgG IgA B cell memory compared to Plasma cell	B cell	CL:0000236	B cell memory	CL:0000236	B cell	CL:0000787	Plasma cell	CL:0000786	GSE22886_IGG_IGA_MEMORY_BCELL_VS_BLOOD_PLASMA_CELL	0.699070303	0.018556658	-97.53363229	0.645873112	APPROVED	calcineurin inhibitor	PPP3CA	5530	SIGNATURE	Homo sapiens	IN_SILICO
cyclosporin-a		cyclosporin-a inhibits CD19 B cell compared to IgD+ B B cell	B cell	CL:0000236	B cell	CL:0000236	B cell	CL:0000236	B cell	CL:0000236	GSE12845_IGD_POS_BLOOD_VS_PRE_GC_TONSIL_BCELL		0.012270921	-97.65013055	0.645873112	APPROVED	calcineurin inhibitor	PPP3CA	5530	SIGNATURE_DOWN	Homo sapiens	PATIENT
cyclosporin-a		cyclosporin-a inhibits IgG IgA B cell memory compared to Plasma cell	B cell	CL:0000236	B cell memory	CL:0000236	B cell	CL:0000787	Plasma cell	CL:0000786	GSE22886_IGG_IGA_MEMORY_BCELL_VS_BM_PLASMA_CELL	0.011451558	0.019554256	-97.75784753	0.645873112	APPROVED	calcineurin inhibitor	PPP3CA	5530	SIGNATURE	Homo sapiens	IN_SILICO
cyclosporin-a		cyclosporin-a inhibits IgM B cell memory compared to Plasma cell	B cell	CL:0000236	B cell memory	CL:0000236	B cell	CL:0000787	Plasma cell	CL:0000786	GSE22886_IGM_MEMORY_BCELL_VS_BM_PLASMA_CELL	0.029936904	0.018556658	-97.98206278	0.645873112	APPROVED	calcineurin inhibitor	PPP3CA	5530	SIGNATURE	Homo sapiens	IN_SILICO
cyclosporin-a		cyclosporin-a inhibits IgM B cell memory compared to Plasma cell	B cell	CL:0000236	B cell memory	CL:0000236	B cell	CL:0000787	Plasma cell	CL:0000786	GSE22886_IGM_MEMORY_BCELL_VS_BM_PLASMA_CELL	0.011451558	0.019554256	-98.13153961	0.645873112	APPROVED	calcineurin inhibitor	PPP3CA	5530	SIGNATURE	Homo sapiens	IN_SILICO
cyclosporin-a		cyclosporin-a inhibits B cell compared to B cell memory	B cell	CL:0000236	B cell	CL:0000236	B cell	CL:0000236	B cell memory	CL:0000787	GSE12366_GC_VS_MEMORY_BCELL	0.012891726	0.012792504	-98.39312407	0.645873112	APPROVED	calcineurin inhibitor	PPP3CA	5530	SIGNATURE	Homo sapiens	PATIENT
cyclosporin-a		cyclosporin-a inhibits IgG IgA B cell memory compared to Plasma cell	B cell	CL:0000236	B cell memory	CL:0000236	B cell	CL:0000787	Plasma cell	CL:0000786	GSE22886_IGG_IGA_MEMORY_BCELL_VS_BM_PLASMA_CELL	0.02209671	0.018556658	-98.72944694	0.645873112	APPROVED	calcineurin inhibitor	PPP3CA	5530	SIGNATURE	Homo sapiens	IN_SILICO
cyclosporin-a		cyclosporin-a inhibits IgM B cell memory compared to Plasma cell	B cell	CL:0000236	B cell memory	CL:0000236	B cell	CL:0000787	Plasma cell	CL:0000786	GSE22886_IGM_MEMORY_BCELL_VS_BM_PLASMA_CELL	0.012891726	0.012792504	-98.91629297	0.645873112	APPROVED	calcineurin inhibitor	PPP3CA	5530	SIGNATURE	Homo sapiens	IN_SILICO
cyclosporin-a		cyclosporin-a inhibits IgG IgA B cell memory compared to Plasma cell	B cell	CL:0000236	B cell memory	CL:0000236	B cell	CL:0000787	Plasma cell	CL:0000786	GSE22886_IGG_IGA_MEMORY_BCELL_VS_BM_PLASMA_CELL	0.012891726	0.012792504	-98.95366218	0.645873112	APPROVED	calcineurin inhibitor	PPP3CA	5530	SIGNATURE	Homo sapiens	IN_SILICO
cyclosporin-a		cyclosporin-a inhibits B cell compared to Plasma cell	B cell	CL:0000236	B cell	CL:0000236	B cell	CL:0000236	Plasma cell	CL:0000786	GSE12366_GC_BCELL_VS_PLASMA_CELL	0.02209671	0.018556658	-98.95366218	0.645873112	APPROVED	calcineurin inhibitor	PPP3CA	5530	SIGNATURE	Homo sapiens	PATIENT
cyclosporin-a		cyclosporin-a inhibits B cell compared to Plasma cell	B cell	CL:0000236	B cell	CL:0000236	B cell	CL:0000236	Plasma cell	CL:0000786	GSE12366_GC_BCELL_VS_PLASMA_CELL	0.017624975	0.017029834	-98.99103139	0.645873112	APPROVED	calcineurin inhibitor	PPP3CA	5530	SIGNATURE	Homo sapiens	PATIENT
cyclosporin-a		cyclosporin-a inhibits IgG IgA B cell memory compared to Plasma cell	B cell	CL:0000236	B cell memory	CL:0000236	B cell	CL:0000787	Plasma cell	CL:0000786	GSE22886_IGG_IGA_MEMORY_BCELL_VS_BM_PLASMA_CELL	0.013078284	0.013413534	-99.06576981	0.645873112	APPROVED	calcineurin inhibitor	PPP3CA	5530	SIGNATURE	Homo sapiens	IN_SILICO
cyclosporin-a		cyclosporin-a inhibits B cell na?ve compared to Plasma cell	B cell	CL:0000236	B cell na?ve	CL:0000236	B cell	CL:0000788	Plasma cell	CL:0000786	GSE22886_NAIVE_BCELL_VS_BM_PLASMA_CELL	0.024133111	0.019554256	-99.14050822	0.645873112	APPROVED	calcineurin inhibitor	PPP3CA	5530	SIGNATURE	Homo sapiens	IN_SILICO
cyclosporin-a		cyclosporin-a inhibits IgM B cell memory compared to Plasma cell	B cell	CL:0000236	B cell memory	CL:0000236	B cell	CL:0000787	Plasma cell	CL:0000786	GSE22886_IGM_MEMORY_BCELL_VS_BM_PLASMA_CELL	0.013078284	0.013413534	-99.17787743	0.645873112	APPROVED	calcineurin inhibitor	PPP3CA	5530	SIGNATURE	Homo sapiens	IN_SILICO
cyclosporin-a		cyclosporin-a inhibits IgG IgA B cell memory compared to Plasma cell	B cell	CL:0000236	B cell memory	CL:0000236	B cell	CL:0000787	Plasma cell	CL:0000786	GSE22886_IGG_IGA_MEMORY_BCELL_VS_BM_PLASMA_CELL	0.017624975	0.017029834	-99.28998505	0.645873112	APPROVED	calcineurin inhibitor	PPP3CA	5530	SIGNATURE	Homo sapiens	IN_SILICO
cyclosporin-a		cyclosporin-a inhibits B cell na?ve compared to Plasma cell	B cell	CL:0000236	B cell na?ve	CL:0000236	B cell	CL:0000788	Plasma cell	CL:0000786	GSE22886_NAIVE_BCELL_VS_BM_PLASMA_CELL	0.016838661	0.012792504	-99.32735426	0.645873112	APPROVED	calcineurin inhibitor	PPP3CA	5530	SIGNATURE	Homo sapiens	IN_SILICO
cyclosporin-a		cyclosporin-a inhibits B cell na?ve compared to Plasma cell	B cell	CL:0000236	B cell na?ve	CL:0000236	B cell	CL:0000788	Plasma cell	CL:0000786	GSE22886_NAIVE_BCELL_VS_BM_PLASMA_CELL	0.016351721	0.013413534	-99.40209268	0.645873112	APPROVED	calcineurin inhibitor	PPP3CA	5530	SIGNATURE	Homo sapiens	IN_SILICO
cyclosporin-a		cyclosporin-a inhibits B cell compared to Plasma cell	B cell	CL:0000236	B cell	CL:0000236	B cell	CL:0000236	Plasma cell	CL:0000786	GSE12366_GC_BCELL_VS_PLASMA_CELL	0.011451558	0.019554256	-99.43946188	0.645873112	APPROVED	calcineurin inhibitor	PPP3CA	5530	SIGNATURE	Homo sapiens	PATIENT
cyclosporin-a		cyclosporin-a inhibits B cell na?ve compared to Plasma cell	B cell	CL:0000236	B cell na?ve	CL:0000236	B cell	CL:0000788	Plasma cell	CL:0000786	GSE22886_NAIVE_BCELL_VS_BM_PLASMA_CELL	0.02209671	0.018556658	-99.5142003	0.645873112	APPROVED	calcineurin inhibitor	PPP3CA	5530	SIGNATURE	Homo sapiens	IN_SILICO
cyclosporin-a		cyclosporin-a inhibits B cell compared to Plasma cell	B cell	CL:0000236	B cell	CL:0000236	B cell	CL:0000236	Plasma cell	CL:0000786	GSE12366_GC_BCELL_VS_PLASMA_CELL	0.013078284	0.013413534	-99.55156951	0.645873112	APPROVED	calcineurin inhibitor	PPP3CA	5530	SIGNATURE	Homo sapiens	PATIENT
cyclosporin-a		cyclosporin-a inhibits B cell compared to Plasma cell	B cell	CL:0000236	B cell	CL:0000236	B cell	CL:0000236	Plasma cell	CL:0000786	GSE12366_GC_BCELL_VS_PLASMA_CELL	0.012891726	0.012792504	-99.62630792	0.645873112	APPROVED	calcineurin inhibitor	PPP3CA	5530	SIGNATURE	Homo sapiens	PATIENT
cyclosporin-a		cyclosporin-a inhibits IgM B cell memory compared to Plasma cell	B cell	CL:0000236	B cell memory	CL:0000236	B cell	CL:0000787	Plasma cell	CL:0000786	GSE22886_IGM_MEMORY_BCELL_VS_BM_PLASMA_CELL	0.017624975	0.017029834	-99.66367713	0.645873112	APPROVED	calcineurin inhibitor	PPP3CA	5530	SIGNATURE	Homo sapiens	IN_SILICO
cyclosporin-a		cyclosporin-a inhibits B cell na?ve compared to Plasma cell	B cell	CL:0000236	B cell na?ve	CL:0000236	B cell	CL:0000788	Plasma cell	CL:0000786	GSE22886_NAIVE_BCELL_VS_BM_PLASMA_CELL	0.017624975	0.017029834	-99.77578475	0.645873112	APPROVED	calcineurin inhibitor	PPP3CA	5530	SIGNATURE	Homo sapiens	IN_SILICO
cyclosporin-a		cyclosporin-a inhibits T helper 2 compared to Basophil	Basophil	CL:0000767	Basophil	CL:0000084	T cell	CL:0000767	T helper 2	CL:0000546	GSE3982_BASOPHIL_VS_TH2		0.013699855	-95.31891085	0.645873112	APPROVED	calcineurin inhibitor	PPP3CA	5530	SIGNATURE_DOWN	Homo sapiens	UNKNOWN
cyclosporin-a		cyclosporin-a inhibits Dendritic cell compared to Macrophage	Dendritic cell	CL:0000451	Dendritic cell	CL:0000235	Macrophage	CL:0000451	Macrophage	CL:0000235	GSE360_DC_VS_MAC	0.022455442	0.225268833	-95.02989537	0.645873112	APPROVED	calcineurin inhibitor	PPP3CA	5530	SIGNATURE	Homo sapiens	IN_VITRO
cyclosporin-a		cyclosporin-a inhibits Dendritic cell compared to Dendritic cell stimulated with Newcastle virus	Dendritic cell	CL:0000451	Dendritic cell	CL:0000451	Dendritic cell	CL:0000451	Dendritic cell	CL:0000451	GSE18791_CTRL_VS_NEWCASTLE_VIRUS_DC_12H	0.013749423		-95.09511376	0.645873112	APPROVED	calcineurin inhibitor	PPP3CA	5530	SIGNATURE_UP	Homo sapiens	IN_VITRO
cyclosporin-a		cyclosporin-a inhibits T helper 2 compared to Dendritic cell	Dendritic cell	CL:0000451	Dendritic cell	CL:0000084	T cell	CL:0000451	T helper 2	CL:0000546	GSE3982_DC_VS_TH2		0.024994406	-95.11376352	0.645873112	APPROVED	calcineurin inhibitor	PPP3CA	5530	SIGNATURE_DOWN	Homo sapiens	UNKNOWN
cyclosporin-a		cyclosporin-a inhibits T helper 2 compared to Dendritic cell	Dendritic cell	CL:0000451	Dendritic cell	CL:0000084	T cell	CL:0000451	T helper 2	CL:0000546	GSE3982_DC_VS_TH2		0.013749423	-95.13241328	0.645873112	APPROVED	calcineurin inhibitor	PPP3CA	5530	SIGNATURE_DOWN	Homo sapiens	UNKNOWN
cyclosporin-a		cyclosporin-a inhibits Dendritic cell compared to Dendritic cell stimulated with Newcastle virus	Dendritic cell	CL:0000451	Dendritic cell	CL:0000451	Dendritic cell	CL:0000451	Dendritic cell	CL:0000451	GSE18791_CTRL_VS_NEWCASTLE_VIRUS_DC_2H	0.018653809		-95.44945916	0.645873112	APPROVED	calcineurin inhibitor	PPP3CA	5530	SIGNATURE_UP	Homo sapiens	IN_VITRO
cyclosporin-a		cyclosporin-a inhibits Dendritic cell compared to Dendritic cell stimulated with IFNa	Dendritic cell	CL:0000451	Dendritic cell	CL:0000451	Dendritic cell	CL:0000451	Dendritic cell	CL:0000451	GSE7509_UNSTIM_VS_IFNA_STIM_IMMATURE_DC	0.013749423		-95.50540843	0.645873112	APPROVED	calcineurin inhibitor	PPP3CA	5530	SIGNATURE_UP	Homo sapiens	IN_VITRO
cyclosporin-a		cyclosporin-a inhibits Dendritic cell stimulated with B.malayi compared to Macrophage stimulated with B.malayi	Dendritic cell	CL:0000451	Dendritic cell	CL:0000235	Macrophage	CL:0000451	Macrophage	CL:0000235	GSE360_DC_VS_MAC_B_MALAYI_LOW_DOSE	0.022455442	0.893845377	-95.51569507	0.645873112	APPROVED	calcineurin inhibitor	PPP3CA	5530	SIGNATURE	Homo sapiens	IN_VITRO
cyclosporin-a		cyclosporin-a inhibits T helper 1 compared to Dendritic cell	Dendritic cell	CL:0000451	Dendritic cell	CL:0000084	T cell	CL:0000451	T helper 1	CL:0000545	GSE3982_DC_VS_TH1		0.024994406	-95.54270794	0.645873112	APPROVED	calcineurin inhibitor	PPP3CA	5530	SIGNATURE_DOWN	Homo sapiens	UNKNOWN
cyclosporin-a		cyclosporin-a inhibits Dendritic cell stimulated with TNF inhibitor compared to Dendritic cell	Dendritic cell	CL:0000451	Dendritic cell	CL:0000451	Dendritic cell	CL:0000451	Dendritic cell	CL:0000451	GSE9239_CTRL_VS_TNF_INHIBITOR_TREATED_DC		0.013699855	-95.63595673	0.645873112	APPROVED	calcineurin inhibitor	PPP3CA	5530	SIGNATURE_DOWN	Homo sapiens	EX_VIVO
cyclosporin-a		cyclosporin-a inhibits Dendritic cell stimulated with TNF inhibitor compared to Dendritic cell	Dendritic cell	CL:0000451	Dendritic cell	CL:0000451	Dendritic cell	CL:0000451	Dendritic cell	CL:0000451	GSE9239_CTRL_VS_TNF_INHIBITOR_TREATED_DC		0.018653809	-95.67325625	0.645873112	APPROVED	calcineurin inhibitor	PPP3CA	5530	SIGNATURE_DOWN	Homo sapiens	EX_VIVO
cyclosporin-a		cyclosporin-a inhibits Dendritic cell stimulated with SIV compared to Dendritic cell stimulated with SIV and HIV	Dendritic cell	CL:0000451	Dendritic cell	CL:0000451	Dendritic cell	CL:0000451	Dendritic cell	CL:0000451	GSE22589_SIV_VS_HIV_AND_SIV_INFECTED_DC	0.132030787	0.862600568	-95.77727952	0.645873112	APPROVED	calcineurin inhibitor	PPP3CA	5530	SIGNATURE	Homo sapiens	IN_VITRO
cyclosporin-a		cyclosporin-a inhibits Dendritic cell compared to Dendritic cell stimulated with Newcastle virus	Dendritic cell	CL:0000451	Dendritic cell	CL:0000451	Dendritic cell	CL:0000451	Dendritic cell	CL:0000451	GSE18791_CTRL_VS_NEWCASTLE_VIRUS_DC_14H	0.013699855		-95.89705334	0.645873112	APPROVED	calcineurin inhibitor	PPP3CA	5530	SIGNATURE_UP	Homo sapiens	IN_VITRO
cyclosporin-a		cyclosporin-a inhibits Dendritic cell stimulated with TNF inhibitor compared to Dendritic cell	Dendritic cell	CL:0000451	Dendritic cell	CL:0000451	Dendritic cell	CL:0000451	Dendritic cell	CL:0000451	GSE9239_CTRL_VS_TNF_INHIBITOR_TREATED_DC		0.013749423	-95.9157031	0.645873112	APPROVED	calcineurin inhibitor	PPP3CA	5530	SIGNATURE_DOWN	Homo sapiens	EX_VIVO
cyclosporin-a		cyclosporin-a inhibits Dendritic cell stimulated with B.malayi compared to Macrophage stimulated with B.malayi	Dendritic cell	CL:0000451	Dendritic cell	CL:0000235	Macrophage	CL:0000451	Macrophage	CL:0000235	GSE360_DC_VS_MAC_B_MALAYI_LOW_DOSE	0.290045368	0.635544097	-95.92675635	0.645873112	APPROVED	calcineurin inhibitor	PPP3CA	5530	SIGNATURE	Homo sapiens	IN_VITRO
cyclosporin-a		cyclosporin-a inhibits Dendritic cell stimulated with B.malayi compared to Macrophage stimulated with B.malayi	Dendritic cell	CL:0000451	Dendritic cell	CL:0000235	Macrophage	CL:0000451	Macrophage	CL:0000235	GSE360_DC_VS_MAC_B_MALAYI_LOW_DOSE	0.421584055	0.180584209	-95.96412556	0.645873112	APPROVED	calcineurin inhibitor	PPP3CA	5530	SIGNATURE	Homo sapiens	IN_VITRO
cyclosporin-a		cyclosporin-a inhibits Dendritic cell compared to Dendritic cell stimulated with Newcastle virus	Dendritic cell	CL:0000451	Dendritic cell	CL:0000451	Dendritic cell	CL:0000451	Dendritic cell	CL:0000451	GSE18791_UNSTIM_VS_NEWCATSLE_VIRUS_DC_18H	0.013749423		-96.06490116	0.645873112	APPROVED	calcineurin inhibitor	PPP3CA	5530	SIGNATURE_UP	Homo sapiens	IN_VITRO
cyclosporin-a		cyclosporin-a inhibits Dendritic cell compared to Dendritic cell	Dendritic cell	CL:0000451	Dendritic cell	CL:0000451	Dendritic cell	CL:0000451	Dendritic cell	CL:0000451	GSE14000_TRANSLATED_RNA_VS_MRNA_DC	0.025009346	0.630268872	-96.11360239	0.645873112	APPROVED	calcineurin inhibitor	PPP3CA	5530	SIGNATURE	Homo sapiens	EX_VIVO
cyclosporin-a		cyclosporin-a inhibits Dendritic cell compared to Dendritic cell stimulated with LPS	Dendritic cell	CL:0000451	Dendritic cell	CL:0000451	Dendritic cell	CL:0000451	Dendritic cell	CL:0000451	GSE14000_UNSTIM_VS_4H_LPS_DC	0.013749423		-96.12085043	0.645873112	APPROVED	calcineurin inhibitor	PPP3CA	5530	SIGNATURE_UP	Homo sapiens	EX_VIVO
cyclosporin-a		cyclosporin-a inhibits Dendritic cell compared to Dendritic cell stimulated with LPS	Dendritic cell	CL:0000451	Dendritic cell	CL:0000451	Dendritic cell	CL:0000451	Dendritic cell	CL:0000451	GSE14000_UNSTIM_VS_4H_LPS_DC_TRANSLATED_RNA	0.018653809		-96.13950019	0.645873112	APPROVED	calcineurin inhibitor	PPP3CA	5530	SIGNATURE_UP	Homo sapiens	EX_VIVO
cyclosporin-a		cyclosporin-a inhibits Dendritic cell compared to Dendritic cell stimulated with Newcastle virus	Dendritic cell	CL:0000451	Dendritic cell	CL:0000451	Dendritic cell	CL:0000451	Dendritic cell	CL:0000451	GSE18791_UNSTIM_VS_NEWCATSLE_VIRUS_DC_2H	0.08103075	0.12465431	-96.18834081	0.645873112	APPROVED	calcineurin inhibitor	PPP3CA	5530	SIGNATURE	Homo sapiens	IN_VITRO
cyclosporin-a		cyclosporin-a inhibits Dendritic cell stimulated with L.donovani compared to Macrophage stimulated with L.donovani	Dendritic cell	CL:0000451	Dendritic cell	CL:0000235	Macrophage	CL:0000451	Macrophage	CL:0000235	GSE360_DC_VS_MAC_L_DONOVANI	0.461871587	0.012792504	-96.52466368	0.645873112	APPROVED	calcineurin inhibitor	PPP3CA	5530	SIGNATURE	Homo sapiens	IN_VITRO
cyclosporin-a		cyclosporin-a inhibits Dendritic cell stimulated with L.donovani compared to Macrophage stimulated with L.donovani	Dendritic cell	CL:0000451	Dendritic cell	CL:0000235	Macrophage	CL:0000451	Macrophage	CL:0000235	GSE360_DC_VS_MAC_L_DONOVANI	0.418203129	0.092006189	-96.56203288	0.645873112	APPROVED	calcineurin inhibitor	PPP3CA	5530	SIGNATURE	Homo sapiens	IN_VITRO
cyclosporin-a		cyclosporin-a inhibits Dendritic cell compared to Dendritic cell stimulated with Newcastle virus	Dendritic cell	CL:0000451	Dendritic cell	CL:0000451	Dendritic cell	CL:0000451	Dendritic cell	CL:0000451	GSE18791_CTRL_VS_NEWCASTLE_VIRUS_DC_14H	0.018653809		-96.56844461	0.645873112	APPROVED	calcineurin inhibitor	PPP3CA	5530	SIGNATURE_UP	Homo sapiens	IN_VITRO
cyclosporin-a		cyclosporin-a inhibits Dendritic cell compared to Dendritic cell stimulated with RARA agonist	Dendritic cell	CL:0000451	Dendritic cell	CL:0000451	Dendritic cell	CL:0000451	Dendritic cell	CL:0000451	GSE5679_CTRL_VS_RARA_AGONIST_AM580_TREATED_DC	0.013749423		-96.60574413	0.645873112	APPROVED	calcineurin inhibitor	PPP3CA	5530	SIGNATURE_UP	Homo sapiens	EX_VIVO
cyclosporin-a		cyclosporin-a inhibits Dendritic cell compared to Dendritic cell stimulated with Newcastle virus	Dendritic cell	CL:0000451	Dendritic cell	CL:0000451	Dendritic cell	CL:0000451	Dendritic cell	CL:0000451	GSE18791_CTRL_VS_NEWCASTLE_VIRUS_DC_8H	0.013749423		-96.62439388	0.645873112	APPROVED	calcineurin inhibitor	PPP3CA	5530	SIGNATURE_UP	Homo sapiens	IN_VITRO
cyclosporin-a		cyclosporin-a inhibits Dendritic cell compared to Dendritic cell stimulated with Newcastle virus	Dendritic cell	CL:0000451	Dendritic cell	CL:0000451	Dendritic cell	CL:0000451	Dendritic cell	CL:0000451	GSE18791_CTRL_VS_NEWCASTLE_VIRUS_DC_4H	0.013699855		-96.64304364	0.645873112	APPROVED	calcineurin inhibitor	PPP3CA	5530	SIGNATURE_UP	Homo sapiens	IN_VITRO
cyclosporin-a		cyclosporin-a inhibits Dendritic cell compared to Dendritic cell stimulated with Newcastle virus	Dendritic cell	CL:0000451	Dendritic cell	CL:0000451	Dendritic cell	CL:0000451	Dendritic cell	CL:0000451	GSE18791_CTRL_VS_NEWCASTLE_VIRUS_DC_12H	0.018653809		-96.6616934	0.645873112	APPROVED	calcineurin inhibitor	PPP3CA	5530	SIGNATURE_UP	Homo sapiens	IN_VITRO
cyclosporin-a		cyclosporin-a inhibits Dendritic cell compared to Dendritic cell stimulated with RARA agonist	Dendritic cell	CL:0000451	Dendritic cell	CL:0000451	Dendritic cell	CL:0000451	Dendritic cell	CL:0000451	GSE5679_CTRL_VS_RARA_AGONIST_AM580_TREATED_DC	0.013699855		-96.71764267	0.645873112	APPROVED	calcineurin inhibitor	PPP3CA	5530	SIGNATURE_UP	Homo sapiens	EX_VIVO
cyclosporin-a		cyclosporin-a inhibits Dendritic cell compared to Dendritic cell stimulated with Newcastle virus	Dendritic cell	CL:0000451	Dendritic cell	CL:0000451	Dendritic cell	CL:0000451	Dendritic cell	CL:0000451	GSE18791_CTRL_VS_NEWCASTLE_VIRUS_DC_4H	0.013749423		-96.77359194	0.645873112	APPROVED	calcineurin inhibitor	PPP3CA	5530	SIGNATURE_UP	Homo sapiens	IN_VITRO
cyclosporin-a		cyclosporin-a inhibits Dendritic cell compared to Dendritic cell stimulated with Newcastle virus	Dendritic cell	CL:0000451	Dendritic cell	CL:0000451	Dendritic cell	CL:0000451	Dendritic cell	CL:0000451	GSE18791_CTRL_VS_NEWCASTLE_VIRUS_DC_6H	0.018653809		-96.7922417	0.645873112	APPROVED	calcineurin inhibitor	PPP3CA	5530	SIGNATURE_UP	Homo sapiens	IN_VITRO
cyclosporin-a		cyclosporin-a inhibits Dendritic cell compared to Dendritic cell stimulated with Rosiglitazone	Dendritic cell	CL:0000451	Dendritic cell	CL:0000451	Dendritic cell	CL:0000451	Dendritic cell	CL:0000451	GSE5679_CTRL_VS_PPARG_LIGAND_ROSIGLITAZONE_TREATED_DC	0.024994406		-96.84819097	0.645873112	APPROVED	calcineurin inhibitor	PPP3CA	5530	SIGNATURE_UP	Homo sapiens	EX_VIVO
cyclosporin-a		cyclosporin-a inhibits Dendritic cell stimulated with T.gondii compared to Macrophage stimulated with T.gondii	Dendritic cell	CL:0000451	Dendritic cell	CL:0000235	Macrophage	CL:0000451	Macrophage	CL:0000235	GSE360_DC_VS_MAC_T_GONDII	0.869280248	0.018556658	-96.86098655	0.645873112	APPROVED	calcineurin inhibitor	PPP3CA	5530	SIGNATURE	Homo sapiens	IN_VITRO
cyclosporin-a		cyclosporin-a inhibits Dendritic cell compared to Dendritic cell stimulated with Newcastle virus	Dendritic cell	CL:0000451	Dendritic cell	CL:0000451	Dendritic cell	CL:0000451	Dendritic cell	CL:0000451	GSE18791_CTRL_VS_NEWCASTLE_VIRUS_DC_10H	0.013699855		-96.96008952	0.645873112	APPROVED	calcineurin inhibitor	PPP3CA	5530	SIGNATURE_UP	Homo sapiens	IN_VITRO
cyclosporin-a		cyclosporin-a inhibits Dendritic cell compared to Dendritic cell stimulated with Newcastle virus	Dendritic cell	CL:0000451	Dendritic cell	CL:0000451	Dendritic cell	CL:0000451	Dendritic cell	CL:0000451	GSE18791_CTRL_VS_NEWCASTLE_VIRUS_DC_14H	0.013749423		-97.03468855	0.645873112	APPROVED	calcineurin inhibitor	PPP3CA	5530	SIGNATURE_UP	Homo sapiens	IN_VITRO
cyclosporin-a		cyclosporin-a inhibits Dendritic cell compared to Dendritic cell stimulated with Newcastle virus	Dendritic cell	CL:0000451	Dendritic cell	CL:0000451	Dendritic cell	CL:0000451	Dendritic cell	CL:0000451	GSE18791_CTRL_VS_NEWCASTLE_VIRUS_DC_16H	0.013699855		-97.09063782	0.645873112	APPROVED	calcineurin inhibitor	PPP3CA	5530	SIGNATURE_UP	Homo sapiens	IN_VITRO
cyclosporin-a		cyclosporin-a inhibits Dendritic cell compared to Dendritic cell stimulated with Rosiglitazone	Dendritic cell	CL:0000451	Dendritic cell	CL:0000451	Dendritic cell	CL:0000451	Dendritic cell	CL:0000451	GSE5679_CTRL_VS_PPARG_LIGAND_ROSIGLITAZONE_TREATED_DC	0.013749423		-97.22118612	0.645873112	APPROVED	calcineurin inhibitor	PPP3CA	5530	SIGNATURE_UP	Homo sapiens	EX_VIVO
cyclosporin-a		cyclosporin-a inhibits Dendritic cell compared to Dendritic cell	Dendritic cell	CL:0000451	Dendritic cell	CL:0000451	Dendritic cell	CL:0000451	Dendritic cell	CL:0000451	GSE14000_TRANSLATED_RNA_VS_MRNA_DC	0.017624975	0.482747885	-97.27204783	0.645873112	APPROVED	calcineurin inhibitor	PPP3CA	5530	SIGNATURE	Homo sapiens	EX_VIVO
cyclosporin-a		cyclosporin-a inhibits Dendritic cell compared to Dendritic cell stimulated with RARA agonist	Dendritic cell	CL:0000451	Dendritic cell	CL:0000451	Dendritic cell	CL:0000451	Dendritic cell	CL:0000451	GSE5679_CTRL_VS_RARA_AGONIST_AM580_TREATED_DC	0.024994406		-97.2771354	0.645873112	APPROVED	calcineurin inhibitor	PPP3CA	5530	SIGNATURE_UP	Homo sapiens	EX_VIVO
cyclosporin-a		cyclosporin-a inhibits Dendritic cell compared to Dendritic cell stimulated with Rosiglitazone	Dendritic cell	CL:0000451	Dendritic cell	CL:0000451	Dendritic cell	CL:0000451	Dendritic cell	CL:0000451	GSE5679_CTRL_VS_PPARG_LIGAND_ROSIGLITAZONE_TREATED_DC	0.013699855		-97.33308467	0.645873112	APPROVED	calcineurin inhibitor	PPP3CA	5530	SIGNATURE_UP	Homo sapiens	EX_VIVO
cyclosporin-a		cyclosporin-a inhibits Dendritic cell stimulated with T.gondii compared to Macrophage stimulated with T.gondii	Dendritic cell	CL:0000451	Dendritic cell	CL:0000235	Macrophage	CL:0000451	Macrophage	CL:0000235	GSE360_DC_VS_MAC_T_GONDII	0.371148319	0.046911979	-97.38415546	0.645873112	APPROVED	calcineurin inhibitor	PPP3CA	5530	SIGNATURE	Homo sapiens	IN_VITRO
cyclosporin-a		cyclosporin-a inhibits Dendritic cell stimulated with L.donovani compared to Macrophage stimulated with L.donovani	Dendritic cell	CL:0000451	Dendritic cell	CL:0000235	Macrophage	CL:0000451	Macrophage	CL:0000235	GSE360_DC_VS_MAC_L_DONOVANI	0.363235847	0.019554256	-97.42152466	0.645873112	APPROVED	calcineurin inhibitor	PPP3CA	5530	SIGNATURE	Homo sapiens	IN_VITRO
cyclosporin-a		cyclosporin-a inhibits Dendritic cell stimulated with L.donovani compared to Macrophage stimulated with L.donovani	Dendritic cell	CL:0000451	Dendritic cell	CL:0000235	Macrophage	CL:0000451	Macrophage	CL:0000235	GSE360_DC_VS_MAC_L_DONOVANI	0.57439684	0.013413534	-97.45889387	0.645873112	APPROVED	calcineurin inhibitor	PPP3CA	5530	SIGNATURE	Homo sapiens	IN_VITRO
cyclosporin-a		cyclosporin-a inhibits Dendritic cell compared to Dendritic cell stimulated with Newcastle virus	Dendritic cell	CL:0000451	Dendritic cell	CL:0000451	Dendritic cell	CL:0000451	Dendritic cell	CL:0000451	GSE18791_CTRL_VS_NEWCASTLE_VIRUS_DC_4H	0.018653809		-97.76202909	0.645873112	APPROVED	calcineurin inhibitor	PPP3CA	5530	SIGNATURE_UP	Homo sapiens	IN_VITRO
cyclosporin-a		cyclosporin-a inhibits Dendritic cell compared to Dendritic cell stimulated with Newcastle virus	Dendritic cell	CL:0000451	Dendritic cell	CL:0000451	Dendritic cell	CL:0000451	Dendritic cell	CL:0000451	GSE18791_CTRL_VS_NEWCASTLE_VIRUS_DC_10H	0.013749423		-97.78067885	0.645873112	APPROVED	calcineurin inhibitor	PPP3CA	5530	SIGNATURE_UP	Homo sapiens	IN_VITRO
cyclosporin-a		cyclosporin-a inhibits Dendritic cell compared to Dendritic cell stimulated with Newcastle virus	Dendritic cell	CL:0000451	Dendritic cell	CL:0000451	Dendritic cell	CL:0000451	Dendritic cell	CL:0000451	GSE18791_CTRL_VS_NEWCASTLE_VIRUS_DC_18H	0.018653809		-97.8925774	0.645873112	APPROVED	calcineurin inhibitor	PPP3CA	5530	SIGNATURE_UP	Homo sapiens	IN_VITRO
cyclosporin-a		cyclosporin-a inhibits Dendritic cell compared to Dendritic cell stimulated with Rosiglitazone	Dendritic cell	CL:0000451	Dendritic cell	CL:0000451	Dendritic cell	CL:0000451	Dendritic cell	CL:0000451	GSE5679_CTRL_VS_PPARG_LIGAND_ROSIGLITAZONE_TREATED_DC	0.012270921		-98.22827303	0.645873112	APPROVED	calcineurin inhibitor	PPP3CA	5530	SIGNATURE_UP	Homo sapiens	EX_VIVO
cyclosporin-a		cyclosporin-a inhibits Dendritic cell compared to Dendritic cell stimulated with Newcastle virus	Dendritic cell	CL:0000451	Dendritic cell	CL:0000451	Dendritic cell	CL:0000451	Dendritic cell	CL:0000451	GSE18791_CTRL_VS_NEWCASTLE_VIRUS_DC_16H	0.013749423		-98.24692279	0.645873112	APPROVED	calcineurin inhibitor	PPP3CA	5530	SIGNATURE_UP	Homo sapiens	IN_VITRO
cyclosporin-a		cyclosporin-a inhibits Dendritic cell compared to Dendritic cell stimulated with Newcastle virus	Dendritic cell	CL:0000451	Dendritic cell	CL:0000451	Dendritic cell	CL:0000451	Dendritic cell	CL:0000451	GSE18791_CTRL_VS_NEWCASTLE_VIRUS_DC_16H	0.018653809		-98.28422231	0.645873112	APPROVED	calcineurin inhibitor	PPP3CA	5530	SIGNATURE_UP	Homo sapiens	IN_VITRO
cyclosporin-a		cyclosporin-a inhibits Dendritic cell compared to Dendritic cell stimulated with RARA agonist	Dendritic cell	CL:0000451	Dendritic cell	CL:0000451	Dendritic cell	CL:0000451	Dendritic cell	CL:0000451	GSE5679_CTRL_VS_RARA_AGONIST_AM580_TREATED_DC	0.012270921		-98.35882134	0.645873112	APPROVED	calcineurin inhibitor	PPP3CA	5530	SIGNATURE_UP	Homo sapiens	EX_VIVO
cyclosporin-a		cyclosporin-a inhibits Dendritic cell compared to Dendritic cell stimulated with Newcastle virus	Dendritic cell	CL:0000451	Dendritic cell	CL:0000451	Dendritic cell	CL:0000451	Dendritic cell	CL:0000451	GSE18791_CTRL_VS_NEWCASTLE_VIRUS_DC_18H	0.013699855		-98.48936964	0.645873112	APPROVED	calcineurin inhibitor	PPP3CA	5530	SIGNATURE_UP	Homo sapiens	IN_VITRO
cyclosporin-a		cyclosporin-a inhibits Dendritic cell compared to Dendritic cell stimulated with LPS	Dendritic cell	CL:0000451	Dendritic cell	CL:0000451	Dendritic cell	CL:0000451	Dendritic cell	CL:0000451	GSE14000_TRANSLATED_RNA_VS_MRNA_4H_LPS_DC	0.017624975	0.560055325	-98.84155456	0.645873112	APPROVED	calcineurin inhibitor	PPP3CA	5530	SIGNATURE	Homo sapiens	EX_VIVO
cyclosporin-a		cyclosporin-a inhibits Dendritic cell compared to Dendritic cell stimulated with Newcastle virus	Dendritic cell	CL:0000451	Dendritic cell	CL:0000451	Dendritic cell	CL:0000451	Dendritic cell	CL:0000451	GSE18791_CTRL_VS_NEWCASTLE_VIRUS_DC_10H	0.018653809		-99.06751212	0.645873112	APPROVED	calcineurin inhibitor	PPP3CA	5530	SIGNATURE_UP	Homo sapiens	IN_VITRO
cyclosporin-a		cyclosporin-a inhibits Dendritic cell compared to Dendritic cell stimulated with Newcastle virus	Dendritic cell	CL:0000451	Dendritic cell	CL:0000451	Dendritic cell	CL:0000451	Dendritic cell	CL:0000451	GSE18791_CTRL_VS_NEWCASTLE_VIRUS_DC_18H	0.013749423		-99.23535994	0.645873112	APPROVED	calcineurin inhibitor	PPP3CA	5530	SIGNATURE_UP	Homo sapiens	IN_VITRO
cyclosporin-a		cyclosporin-a inhibits Hematopoietic stem and progenitor cells in Sleep apnea syndrome compared to Hematopoietic stem and progenitor cells in Sleep apnea syndrome	Hematopoietic stem and progenitor cells	CL:0000837	Hematopoietic stem and progenitor cells	CL:0000837	Hematopoietic stem and progenitor cells	CL:0000837	Hematopoietic stem and progenitor cells	CL:0000837	GSE70580_ILC1_vs_ILC2_ILC3	0.332498683	0.479538492	-95.10463378	0.645873112	APPROVED	calcineurin inhibitor	PPP3CA	5530	SIGNATURE	Homo sapiens	PATIENT
cyclosporin-a		cyclosporin-a inhibits Hematopoietic stem and progenitor cells stimulated with GSK-3 Inhibitor IX compared to Hematopoietic stem and progenitor cells stimulated with BMP4	Hematopoietic stem and progenitor cells	CL:0000837	Hematopoietic stem and progenitor cells	CL:0000837	Hematopoietic stem and progenitor cells	CL:0000837	Hematopoietic stem and progenitor cells	CL:0000837	GSE26351_WNT_VS_BMP_PATHWAY_STIM_HEMATOPOIETIC_PROGENITORS	0.029936904	0.177532065	-95.14200299	0.645873112	APPROVED	calcineurin inhibitor	PPP3CA	5530	SIGNATURE	Homo sapiens	EX_VIVO
cyclosporin-a		cyclosporin-a inhibits CD4+CD8+ Thymocyte compared to T CD4+ na?ve	Hematopoietic stem and progenitor cells	CL:0000837	Thymocyte	CL:0000084	T cell	CL:0000893	T CD4+ na?ve	CL:0000895	GSE1460_DP_THYMOCYTE_VS_NAIVE_CD4_TCELL_ADULT_BLOOD	0.024994406		-95.18836255	0.645873112	APPROVED	calcineurin inhibitor	PPP3CA	5530	SIGNATURE_UP	Homo sapiens	UNKNOWN
cyclosporin-a		cyclosporin-a inhibits CD4+CD8+ Thymocyte compared to T CD4+	Hematopoietic stem and progenitor cells	CL:0000837	Thymocyte	CL:0000084	T cell	CL:0000893	T CD4+	CL:0000624	GSE1460_DP_VS_CD4_THYMOCYTE	0.025009346	0.020226757	-95.21674141	0.645873112	APPROVED	calcineurin inhibitor	PPP3CA	5530	SIGNATURE	Homo sapiens	UNKNOWN
cyclosporin-a		cyclosporin-a inhibits CD4+CD8+ Thymocyte compared to T CD4+ na?ve	Hematopoietic stem and progenitor cells	CL:0000837	Thymocyte	CL:0000084	T cell	CL:0000893	T CD4+ na?ve	CL:0000895	GSE1460_DP_THYMOCYTE_VS_NAIVE_CD4_TCELL_ADULT_BLOOD	0.012270921		-95.28161134	0.645873112	APPROVED	calcineurin inhibitor	PPP3CA	5530	SIGNATURE_UP	Homo sapiens	UNKNOWN
cyclosporin-a		cyclosporin-a inhibits CD4+ SP Thymocyte compared to DP Thymocyte	Hematopoietic stem and progenitor cells	CL:0000837	Thymocyte	CL:0000837	Hematopoietic stem and progenitor cells	CL:0000893	Thymocyte	CL:0000893	GSE22601_DOUBLE_POSITIVE_VS_CD4_SINGLE_POSITIVE_THYMOCYTE		0.018653809	-95.89705334	0.645873112	APPROVED	calcineurin inhibitor	PPP3CA	5530	SIGNATURE_DOWN	Homo sapiens	PATIENT
cyclosporin-a		cyclosporin-a inhibits Hematopoietic stem and progenitor cells stimulated with GSK-3 Inhibitor IX compared to Hematopoietic stem and progenitor cells stimulated with BMP4	Hematopoietic stem and progenitor cells	CL:0000837	Hematopoietic stem and progenitor cells	CL:0000837	Hematopoietic stem and progenitor cells	CL:0000837	Hematopoietic stem and progenitor cells	CL:0000837	GSE26351_WNT_VS_BMP_PATHWAY_STIM_HEMATOPOIETIC_PROGENITORS	0.012891726	0.51609122	-95.92675635	0.645873112	APPROVED	calcineurin inhibitor	PPP3CA	5530	SIGNATURE	Homo sapiens	EX_VIVO
cyclosporin-a		cyclosporin-a inhibits CD4+CD8+ Thymocyte compared to T CD4+ na?ve	Hematopoietic stem and progenitor cells	CL:0000837	Thymocyte	CL:0000084	T cell	CL:0000893	T CD4+ na?ve	CL:0000895	GSE1460_DP_THYMOCYTE_VS_NAIVE_CD4_TCELL_ADULT_BLOOD	0.025009346	0.143074061	-96.00149477	0.645873112	APPROVED	calcineurin inhibitor	PPP3CA	5530	SIGNATURE	Homo sapiens	UNKNOWN
cyclosporin-a		cyclosporin-a inhibits CD4+ SP Thymocyte compared to DP Thymocyte	Hematopoietic stem and progenitor cells	CL:0000837	Thymocyte	CL:0000837	Hematopoietic stem and progenitor cells	CL:0000893	Thymocyte	CL:0000893	GSE22601_DOUBLE_POSITIVE_VS_CD4_SINGLE_POSITIVE_THYMOCYTE		0.018664263	-96.12085043	0.645873112	APPROVED	calcineurin inhibitor	PPP3CA	5530	SIGNATURE_DOWN	Homo sapiens	PATIENT
cyclosporin-a		cyclosporin-a inhibits Hematopoietic stem and progenitor cells stimulated with GSK-3 Inhibitor IX compared to Hematopoietic stem and progenitor cells stimulated with BMP4	Hematopoietic stem and progenitor cells	CL:0000837	Hematopoietic stem and progenitor cells	CL:0000837	Hematopoietic stem and progenitor cells	CL:0000837	Hematopoietic stem and progenitor cells	CL:0000837	GSE26351_WNT_VS_BMP_PATHWAY_STIM_HEMATOPOIETIC_PROGENITORS	0.025009346	0.545663752	-96.30044843	0.645873112	APPROVED	calcineurin inhibitor	PPP3CA	5530	SIGNATURE	Homo sapiens	EX_VIVO
cyclosporin-a		cyclosporin-a inhibits CD4+ SP Thymocyte compared to CD8+ SP Thymocyte	Hematopoietic stem and progenitor cells	CL:0000837	Thymocyte	CL:0000837	Hematopoietic stem and progenitor cells	CL:0000893	Thymocyte	CL:0000893	GSE22601_CD4_SINGLE_POSITIVE_VS_CD8_SINGLE_POSITIVE_THYMOCYTE	0.012270921		-96.68034316	0.645873112	APPROVED	calcineurin inhibitor	PPP3CA	5530	SIGNATURE_UP	Homo sapiens	PATIENT
cyclosporin-a		cyclosporin-a inhibits CD4+CD8+ Thymocyte compared to T CD4+ na?ve	Hematopoietic stem and progenitor cells	CL:0000837	Thymocyte	CL:0000084	T cell	CL:0000893	T CD4+ na?ve	CL:0000895	GSE1460_DP_THYMOCYTE_VS_NAIVE_CD4_TCELL_ADULT_BLOOD	0.012891726	0.07144955	-97.38415546	0.645873112	APPROVED	calcineurin inhibitor	PPP3CA	5530	SIGNATURE	Homo sapiens	UNKNOWN
cyclosporin-a		cyclosporin-a inhibits CD4+ SP Thymocyte compared to DP Thymocyte	Hematopoietic stem and progenitor cells	CL:0000837	Thymocyte	CL:0000837	Hematopoietic stem and progenitor cells	CL:0000893	Thymocyte	CL:0000893	GSE22601_DOUBLE_POSITIVE_VS_CD4_SINGLE_POSITIVE_THYMOCYTE		0.024994406	-97.72472958	0.645873112	APPROVED	calcineurin inhibitor	PPP3CA	5530	SIGNATURE_DOWN	Homo sapiens	PATIENT
cyclosporin-a		cyclosporin-a inhibits CD4+ SP Thymocyte compared to CD8+ SP Thymocyte	Hematopoietic stem and progenitor cells	CL:0000837	Thymocyte	CL:0000837	Hematopoietic stem and progenitor cells	CL:0000893	Thymocyte	CL:0000893	GSE22601_CD4_SINGLE_POSITIVE_VS_CD8_SINGLE_POSITIVE_THYMOCYTE	0.025009346	0.732922502	-97.86995516	0.645873112	APPROVED	calcineurin inhibitor	PPP3CA	5530	SIGNATURE	Homo sapiens	PATIENT
cyclosporin-a		cyclosporin-a inhibits CD4+ SP Thymocyte compared to CD8+ SP Thymocyte	Hematopoietic stem and progenitor cells	CL:0000837	Thymocyte	CL:0000837	Hematopoietic stem and progenitor cells	CL:0000893	Thymocyte	CL:0000893	GSE22601_CD4_SINGLE_POSITIVE_VS_CD8_SINGLE_POSITIVE_THYMOCYTE	0.011451558	0.723480543	-97.98206278	0.645873112	APPROVED	calcineurin inhibitor	PPP3CA	5530	SIGNATURE	Homo sapiens	PATIENT
cyclosporin-a		cyclosporin-a inhibits CD4+ SP Thymocyte compared to CD8+ SP Thymocyte	Hematopoietic stem and progenitor cells	CL:0000837	Thymocyte	CL:0000837	Hematopoietic stem and progenitor cells	CL:0000893	Thymocyte	CL:0000893	GSE22601_CD4_SINGLE_POSITIVE_VS_CD8_SINGLE_POSITIVE_THYMOCYTE	0.013078284	0.713869488	-98.24364723	0.645873112	APPROVED	calcineurin inhibitor	PPP3CA	5530	SIGNATURE	Homo sapiens	PATIENT
cyclosporin-a		cyclosporin-a inhibits CD4+ SP Thymocyte compared to DP Thymocyte	Hematopoietic stem and progenitor cells	CL:0000837	Thymocyte	CL:0000837	Hematopoietic stem and progenitor cells	CL:0000893	Thymocyte	CL:0000893	GSE22601_DOUBLE_POSITIVE_VS_CD4_SINGLE_POSITIVE_THYMOCYTE		0.013699855	-98.6385677	0.645873112	APPROVED	calcineurin inhibitor	PPP3CA	5530	SIGNATURE_DOWN	Homo sapiens	PATIENT
cyclosporin-a		cyclosporin-a inhibits CD4+ SP Thymocyte compared to DP Thymocyte	Hematopoietic stem and progenitor cells	CL:0000837	Thymocyte	CL:0000837	Hematopoietic stem and progenitor cells	CL:0000893	Thymocyte	CL:0000893	GSE22601_DOUBLE_POSITIVE_VS_CD4_SINGLE_POSITIVE_THYMOCYTE		0.013749423	-98.69451697	0.645873112	APPROVED	calcineurin inhibitor	PPP3CA	5530	SIGNATURE_DOWN	Homo sapiens	PATIENT
cyclosporin-a		cyclosporin-a inhibits CD4+ SP Thymocyte compared to DP Thymocyte	Hematopoietic stem and progenitor cells	CL:0000837	Thymocyte	CL:0000837	Hematopoietic stem and progenitor cells	CL:0000893	Thymocyte	CL:0000893	GSE22601_DOUBLE_POSITIVE_VS_CD4_SINGLE_POSITIVE_THYMOCYTE		0.012270921	-98.71316673	0.645873112	APPROVED	calcineurin inhibitor	PPP3CA	5530	SIGNATURE_DOWN	Homo sapiens	PATIENT
cyclosporin-a		cyclosporin-a inhibits CD4+ SP Thymocyte compared to CD8+ SP Thymocyte	Hematopoietic stem and progenitor cells	CL:0000837	Thymocyte	CL:0000837	Hematopoietic stem and progenitor cells	CL:0000893	Thymocyte	CL:0000893	GSE22601_CD4_SINGLE_POSITIVE_VS_CD8_SINGLE_POSITIVE_THYMOCYTE	0.02209671	0.063318866	-98.84155456	0.645873112	APPROVED	calcineurin inhibitor	PPP3CA	5530	SIGNATURE	Homo sapiens	PATIENT
cyclosporin-a		cyclosporin-a inhibits CD4+ SP Thymocyte compared to CD8+ SP Thymocyte	Hematopoietic stem and progenitor cells	CL:0000837	Thymocyte	CL:0000837	Hematopoietic stem and progenitor cells	CL:0000893	Thymocyte	CL:0000893	GSE22601_CD4_SINGLE_POSITIVE_VS_CD8_SINGLE_POSITIVE_THYMOCYTE	0.012891726	0.861163715	-99.21524664	0.645873112	APPROVED	calcineurin inhibitor	PPP3CA	5530	SIGNATURE	Homo sapiens	PATIENT
cyclosporin-a		cyclosporin-a inhibits T helper 2 compared to Macrophage	Macrophage	CL:0000235	Macrophage	CL:0000084	T cell	CL:0000235	T helper 2	CL:0000546	GSE3982_MAC_VS_TH2		0.018664263	-95.05781425	0.645873112	APPROVED	calcineurin inhibitor	PPP3CA	5530	SIGNATURE_DOWN	Homo sapiens	UNKNOWN
cyclosporin-a		cyclosporin-a inhibits Macrophage stimulated with CSF1 compared to Macrophage stimulated with CSF1, IFNg and Pam3Cys	Macrophage	CL:0000235	Macrophage	CL:0000235	Macrophage	CL:0000235	Macrophage	CL:0000235	GSE11864_CSF1_VS_CSF1_IFNG_PAM3CYS_IN_MAC	0.468800764	0.103668694	-95.06726457	0.645873112	APPROVED	calcineurin inhibitor	PPP3CA	5530	SIGNATURE	Homo sapiens	IN_VITRO
cyclosporin-a		cyclosporin-a inhibits Macrophage compared to Macrophage stimulated with CSF1 and IFNg	Macrophage	CL:0000235	Macrophage	CL:0000235	Macrophage	CL:0000235	Macrophage	CL:0000235	GSE11864_UNTREATED_VS_CSF1_IFNG_IN_MAC	0.347842897	0.020887973	-95.10463378	0.645873112	APPROVED	calcineurin inhibitor	PPP3CA	5530	SIGNATURE	Homo sapiens	IN_VITRO
cyclosporin-a		cyclosporin-a inhibits Macrophage stimulated with IL4 and Dexamethasone compared to Macrophage stimulated with IL4, Dexamethasone and TGFB	Macrophage	CL:0000235	Macrophage	CL:0000235	Macrophage	CL:0000235	Macrophage	CL:0000235	GSE7568_CTRL_VS_3H_TGFB_TREATED_MACROPHAGES_WITH_IL4_AND_DEXAMETHASONE	0.03314941		-95.28161134	0.645873112	APPROVED	calcineurin inhibitor	PPP3CA	5530	SIGNATURE_UP	Homo sapiens	IN_VITRO
cyclosporin-a		cyclosporin-a inhibits Macrophage compared to Macrophage stimulated with CSF1, IFNg and Pam3Cys	Macrophage	CL:0000235	Macrophage	CL:0000235	Macrophage	CL:0000235	Macrophage	CL:0000235	GSE11864_UNTREATED_VS_CSF1_IFNG_PAM3CYS_IN_MAC	0.864512127	0.018556658	-95.32884903	0.645873112	APPROVED	calcineurin inhibitor	PPP3CA	5530	SIGNATURE	Homo sapiens	IN_VITRO
cyclosporin-a		cyclosporin-a inhibits Macrophage stimulated with L.donovani compared to Macrophage stimulated with B.malayi	Macrophage	CL:0000235	Macrophage	CL:0000235	Macrophage	CL:0000235	Macrophage	CL:0000235	GSE360_L_DONOVANI_VS_B_MALAYI_LOW_DOSE_MAC	0.319057043	0.037564573	-95.55306428	0.645873112	APPROVED	calcineurin inhibitor	PPP3CA	5530	SIGNATURE	Homo sapiens	IN_VITRO
cyclosporin-a		cyclosporin-a inhibits Macrophage stimulated with CSF1 compared to Macrophage stimulated with CSF1, IFNg and Pam3Cys	Macrophage	CL:0000235	Macrophage	CL:0000235	Macrophage	CL:0000235	Macrophage	CL:0000235	GSE11864_CSF1_VS_CSF1_IFNG_PAM3CYS_IN_MAC	0.011451558	0.18406097	-95.62780269	0.645873112	APPROVED	calcineurin inhibitor	PPP3CA	5530	SIGNATURE	Homo sapiens	IN_VITRO
cyclosporin-a		cyclosporin-a inhibits Macrophage stimulated with T.gondii compared to Macrophage stimulated with B.malayi	Macrophage	CL:0000235	Macrophage	CL:0000235	Macrophage	CL:0000235	Macrophage	CL:0000235	GSE360_T_GONDII_VS_B_MALAYI_LOW_DOSE_MAC	0.249098756	0.103668694	-95.85201794	0.645873112	APPROVED	calcineurin inhibitor	PPP3CA	5530	SIGNATURE	Homo sapiens	IN_VITRO
cyclosporin-a		cyclosporin-a inhibits T helper 2 compared to Macrophage	Macrophage	CL:0000235	Macrophage	CL:0000084	T cell	CL:0000235	T helper 2	CL:0000546	GSE3982_MAC_VS_TH2		0.013749423	-95.85975382	0.645873112	APPROVED	calcineurin inhibitor	PPP3CA	5530	SIGNATURE_DOWN	Homo sapiens	UNKNOWN
cyclosporin-a		cyclosporin-a inhibits Macrophage stimulated with CSF1 compared to Macrophage stimulated with CSF1, IFNg and Pam3Cys	Macrophage	CL:0000235	Macrophage	CL:0000235	Macrophage	CL:0000235	Macrophage	CL:0000235	GSE11864_CSF1_VS_CSF1_IFNG_PAM3CYS_IN_MAC	0.052916749	0.099065859	-96.30044843	0.645873112	APPROVED	calcineurin inhibitor	PPP3CA	5530	SIGNATURE	Homo sapiens	IN_VITRO
cyclosporin-a		cyclosporin-a inhibits T helper 2 compared to Macrophage	Macrophage	CL:0000235	Macrophage	CL:0000084	T cell	CL:0000235	T helper 2	CL:0000546	GSE3982_MAC_VS_TH2		0.013699855	-96.32599776	0.645873112	APPROVED	calcineurin inhibitor	PPP3CA	5530	SIGNATURE_DOWN	Homo sapiens	UNKNOWN
cyclosporin-a		cyclosporin-a inhibits T helper 2 compared to Macrophage	Macrophage	CL:0000235	Macrophage	CL:0000084	T cell	CL:0000235	T helper 2	CL:0000546	GSE3982_MAC_VS_TH2		0.012270921	-96.34464752	0.645873112	APPROVED	calcineurin inhibitor	PPP3CA	5530	SIGNATURE_DOWN	Homo sapiens	UNKNOWN
cyclosporin-a		cyclosporin-a inhibits Macrophage compared to Macrophage M2	Macrophage	CL:0000235	Macrophage	CL:0000235	Macrophage	CL:0000235	Macrophage M2	CL:0000890	GSE32164_RESTING_DIFFERENTIATED_VS_ALTERNATIVELY_ACT_M2_MACROPHAGE	0.011451558	0.243074666	-96.44992526	0.645873112	APPROVED	calcineurin inhibitor	PPP3CA	5530	SIGNATURE	Homo sapiens	IN_VITRO
cyclosporin-a		cyclosporin-a inhibits Macrophage compared to Macrophage M2	Macrophage	CL:0000235	Macrophage	CL:0000235	Macrophage	CL:0000235	Macrophage M2	CL:0000890	GSE32164_RESTING_DIFFERENTIATED_VS_ALTERNATIVELY_ACT_M2_MACROPHAGE	0.012891726	0.230841546	-96.44992526	0.645873112	APPROVED	calcineurin inhibitor	PPP3CA	5530	SIGNATURE	Homo sapiens	IN_VITRO
cyclosporin-a		cyclosporin-a inhibits T helper 2 compared to Macrophage	Macrophage	CL:0000235	Macrophage	CL:0000084	T cell	CL:0000235	T helper 2	CL:0000546	GSE3982_MAC_VS_TH2		0.024994406	-96.49384558	0.645873112	APPROVED	calcineurin inhibitor	PPP3CA	5530	SIGNATURE_DOWN	Homo sapiens	UNKNOWN
cyclosporin-a		cyclosporin-a inhibits Macrophage compared to Macrophage stimulated with CSF1, IFNg and Pam3Cys	Macrophage	CL:0000235	Macrophage	CL:0000235	Macrophage	CL:0000235	Macrophage	CL:0000235	GSE11864_UNTREATED_VS_CSF1_IFNG_PAM3CYS_IN_MAC	0.149099054	0.132633562	-96.6367713	0.645873112	APPROVED	calcineurin inhibitor	PPP3CA	5530	SIGNATURE	Homo sapiens	IN_VITRO
cyclosporin-a		cyclosporin-a inhibits Macrophage compared to Macrophage stimulated with L.donovani	Macrophage	CL:0000235	Macrophage	CL:0000235	Macrophage	CL:0000235	Macrophage	CL:0000235	GSE360_CTRL_VS_L_DONOVANI_MAC	0.011451558	0.072196322	-96.86098655	0.645873112	APPROVED	calcineurin inhibitor	PPP3CA	5530	SIGNATURE	Homo sapiens	IN_VITRO
cyclosporin-a		cyclosporin-a inhibits Macrophage stimulated with IL4 compared to Macrophage stimulated with IL4 and Dexamethasone	Macrophage	CL:0000235	Macrophage	CL:0000235	Macrophage	CL:0000235	Macrophage	CL:0000235	GSE7568_IL4_VS_IL4_AND_DEXAMETHASONE_TREATED_MACROPHAGE	0.012270921		-96.99738903	0.645873112	APPROVED	calcineurin inhibitor	PPP3CA	5530	SIGNATURE_UP	Homo sapiens	IN_VITRO
cyclosporin-a		cyclosporin-a inhibits Macrophage compared to Macrophage M2	Macrophage	CL:0000235	Macrophage	CL:0000235	Macrophage	CL:0000235	Macrophage M2	CL:0000890	GSE32164_RESTING_DIFFERENTIATED_VS_ALTERNATIVELY_ACT_M2_MACROPHAGE	0.012270921		-97.05333831	0.645873112	APPROVED	calcineurin inhibitor	PPP3CA	5530	SIGNATURE_UP	Homo sapiens	IN_VITRO
cyclosporin-a		cyclosporin-a inhibits T helper 2 compared to Macrophage	Macrophage	CL:0000235	Macrophage	CL:0000084	T cell	CL:0000235	T helper 2	CL:0000546	GSE3982_MAC_VS_TH2		0.018653809	-97.05333831	0.645873112	APPROVED	calcineurin inhibitor	PPP3CA	5530	SIGNATURE_DOWN	Homo sapiens	UNKNOWN
cyclosporin-a		cyclosporin-a inhibits Macrophage compared to Macrophage M2	Macrophage	CL:0000235	Macrophage	CL:0000235	Macrophage	CL:0000235	Macrophage M2	CL:0000890	GSE32164_RESTING_DIFFERENTIATED_VS_ALTERNATIVELY_ACT_M2_MACROPHAGE	0.013078284	0.084746792	-97.34678625	0.645873112	APPROVED	calcineurin inhibitor	PPP3CA	5530	SIGNATURE	Homo sapiens	IN_VITRO
cyclosporin-a		cyclosporin-a inhibits Macrophage compared to Macrophage M2	Macrophage	CL:0000235	Macrophage	CL:0000235	Macrophage	CL:0000235	Macrophage M2	CL:0000890	GSE32164_RESTING_DIFFERENTIATED_VS_ALTERNATIVELY_ACT_M2_MACROPHAGE	0.025009346	0.342648055	-97.42152466	0.645873112	APPROVED	calcineurin inhibitor	PPP3CA	5530	SIGNATURE	Homo sapiens	IN_VITRO
cyclosporin-a		cyclosporin-a inhibits Macrophage compared to Macrophage stimulated with IFNg	Macrophage	CL:0000235	Macrophage	CL:0000235	Macrophage	CL:0000235	Macrophage	CL:0000235	GSE1925_CTRL_VS_IFNG_PRIMED_MACROPHAGE_24H_IFNG_STIM	0.194640831	0.359864772	-97.53363229	0.645873112	APPROVED	calcineurin inhibitor	PPP3CA	5530	SIGNATURE	Homo sapiens	EX_VIVO
cyclosporin-a		cyclosporin-a inhibits Macrophage stimulated with CMYC Inhibitor compared to Macrophage M2	Macrophage	CL:0000235	Macrophage M2	CL:0000235	Macrophage	CL:0000890	Macrophage	CL:0000235	GSE32164_ALTERNATIVELY_ACT_M2_VS_CMYC_INHIBITED_MACROPHAGE		0.024994406	-97.57553152	0.645873112	APPROVED	calcineurin inhibitor	PPP3CA	5530	SIGNATURE_DOWN	Homo sapiens	IN_VITRO
cyclosporin-a		cyclosporin-a inhibits Macrophage compared to Macrophage stimulated with CSF1 and IFNg	Macrophage	CL:0000235	Macrophage	CL:0000235	Macrophage	CL:0000235	Macrophage	CL:0000235	GSE11864_UNTREATED_VS_CSF1_IFNG_IN_MAC	0.439211557	0.017029834	-97.68310912	0.645873112	APPROVED	calcineurin inhibitor	PPP3CA	5530	SIGNATURE	Homo sapiens	IN_VITRO
cyclosporin-a		cyclosporin-a inhibits Macrophage compared to Macrophage M2	Macrophage	CL:0000235	Macrophage	CL:0000235	Macrophage	CL:0000235	Macrophage M2	CL:0000890	GSE32164_RESTING_DIFFERENTIATED_VS_ALTERNATIVELY_ACT_M2_MACROPHAGE	0.013699855		-97.87392764	0.645873112	APPROVED	calcineurin inhibitor	PPP3CA	5530	SIGNATURE_UP	Homo sapiens	IN_VITRO
cyclosporin-a		cyclosporin-a inhibits Macrophage stimulated with L.donovani compared to Macrophage stimulated with B.malayi	Macrophage	CL:0000235	Macrophage	CL:0000235	Macrophage	CL:0000235	Macrophage	CL:0000235	GSE360_L_DONOVANI_VS_B_MALAYI_LOW_DOSE_MAC	0.617063543	0.029049066	-97.98206278	0.645873112	APPROVED	calcineurin inhibitor	PPP3CA	5530	SIGNATURE	Homo sapiens	IN_VITRO
cyclosporin-a		cyclosporin-a inhibits Macrophage in Breast invasive carcinom compared to Macrophage in Breast invasive carcinom	Macrophage	CL:0000235	Macrophage	CL:0000235	Macrophage	CL:0000235	Macrophage	CL:0000235	Casseta_TumorAssociatedMacrophage_vs_ResidentMacrophage_in_BRCA	0.567944401	0.082352941	-98.01943199	0.645873112	APPROVED	calcineurin inhibitor	PPP3CA	5530	SIGNATURE	Homo sapiens	PATIENT
cyclosporin-a		cyclosporin-a inhibits Macrophage compared to Macrophage M2	Macrophage	CL:0000235	Macrophage	CL:0000235	Macrophage	CL:0000235	Macrophage M2	CL:0000890	GSE32164_RESTING_DIFFERENTIATED_VS_ALTERNATIVELY_ACT_M2_MACROPHAGE	0.013749423		-98.11637449	0.645873112	APPROVED	calcineurin inhibitor	PPP3CA	5530	SIGNATURE_UP	Homo sapiens	IN_VITRO
cyclosporin-a		cyclosporin-a inhibits Macrophage compared to Macrophage M2	Macrophage	CL:0000235	Macrophage	CL:0000235	Macrophage	CL:0000235	Macrophage M2	CL:0000890	GSE32164_RESTING_DIFFERENTIATED_VS_ALTERNATIVELY_ACT_M2_MACROPHAGE	0.018664263		-98.17232376	0.645873112	APPROVED	calcineurin inhibitor	PPP3CA	5530	SIGNATURE_UP	Homo sapiens	IN_VITRO
cyclosporin-a		cyclosporin-a inhibits Macrophage compared to Macrophage M2	Macrophage	CL:0000235	Macrophage	CL:0000235	Macrophage	CL:0000235	Macrophage M2	CL:0000890	GSE32164_RESTING_DIFFERENTIATED_VS_ALTERNATIVELY_ACT_M2_MACROPHAGE	0.024994406		-98.6385677	0.645873112	APPROVED	calcineurin inhibitor	PPP3CA	5530	SIGNATURE_UP	Homo sapiens	IN_VITRO
cyclosporin-a		cyclosporin-a inhibits Macrophage compared to Macrophage M2	Macrophage	CL:0000235	Macrophage	CL:0000235	Macrophage	CL:0000235	Macrophage M2	CL:0000890	GSE32164_RESTING_DIFFERENTIATED_VS_ALTERNATIVELY_ACT_M2_MACROPHAGE	0.02209671	0.018556658	-98.65470852	0.645873112	APPROVED	calcineurin inhibitor	PPP3CA	5530	SIGNATURE	Homo sapiens	IN_VITRO
cyclosporin-a		cyclosporin-a inhibits T helper 2 compared to Mast cell	Mast cell	CL:0000097	Mast cell	CL:0000084	T cell	CL:0000097	T helper 2	CL:0000546	GSE3982_MAST_CELL_VS_TH2		0.018664263	-95.15106304	0.645873112	APPROVED	calcineurin inhibitor	PPP3CA	5530	SIGNATURE_DOWN	Homo sapiens	UNKNOWN
cyclosporin-a		cyclosporin-a inhibits Mast cell in Leukemia compared to Mast cell stimulated with A3R inhibitor in Leukemia	Mast cell	CL:0000097	Mast cell	CL:0000097	Mast cell	CL:0000097	Mast cell	CL:0000097	GSE19888_CTRL_VS_A3R_INHIBITOR_TREATED_MAST_CELL	0.013078284	0.013413534	-95.21674141	0.645873112	APPROVED	calcineurin inhibitor	PPP3CA	5530	SIGNATURE	Homo sapiens	IN_VITRO
cyclosporin-a		cyclosporin-a inhibits T helper 2 compared to Mast cell	Mast cell	CL:0000097	Mast cell	CL:0000084	T cell	CL:0000097	T helper 2	CL:0000546	GSE3982_MAST_CELL_VS_TH2		0.012270921	-95.9157031	0.645873112	APPROVED	calcineurin inhibitor	PPP3CA	5530	SIGNATURE_DOWN	Homo sapiens	UNKNOWN
cyclosporin-a		cyclosporin-a inhibits Mast cell in Leukemia compared to Mast cell stimulated with A3R inhibitor in Leukemia	Mast cell	CL:0000097	Mast cell	CL:0000097	Mast cell	CL:0000097	Mast cell	CL:0000097	GSE19888_CTRL_VS_A3R_INHIBITOR_TREATED_MAST_CELL	0.013699855		-96.0462514	0.645873112	APPROVED	calcineurin inhibitor	PPP3CA	5530	SIGNATURE_UP	Homo sapiens	IN_VITRO
cyclosporin-a		cyclosporin-a inhibits T helper 2 compared to Mast cell	Mast cell	CL:0000097	Mast cell	CL:0000084	T cell	CL:0000097	T helper 2	CL:0000546	GSE3982_MAST_CELL_VS_TH2		0.018653809	-96.10220067	0.645873112	APPROVED	calcineurin inhibitor	PPP3CA	5530	SIGNATURE_DOWN	Homo sapiens	UNKNOWN
cyclosporin-a		cyclosporin-a inhibits T helper 1 compared to Mast cell	Mast cell	CL:0000097	Mast cell	CL:0000084	T cell	CL:0000097	T helper 1	CL:0000545	GSE3982_MAST_CELL_VS_TH1		0.024994406	-96.10220067	0.645873112	APPROVED	calcineurin inhibitor	PPP3CA	5530	SIGNATURE_DOWN	Homo sapiens	UNKNOWN
cyclosporin-a		cyclosporin-a inhibits T helper 2 compared to Mast cell	Mast cell	CL:0000097	Mast cell	CL:0000084	T cell	CL:0000097	T helper 2	CL:0000546	GSE3982_MAST_CELL_VS_TH2		0.024994406	-96.92279	0.645873112	APPROVED	calcineurin inhibitor	PPP3CA	5530	SIGNATURE_DOWN	Homo sapiens	UNKNOWN
cyclosporin-a		cyclosporin-a inhibits Mast cell in Leukemia compared to Mast cell stimulated with A3R inhibitor in Leukemia	Mast cell	CL:0000097	Mast cell	CL:0000097	Mast cell	CL:0000097	Mast cell	CL:0000097	GSE19888_CTRL_VS_A3R_INHIBITOR_TREATED_MAST_CELL	0.011451558	0.019554256	-97.49626308	0.645873112	APPROVED	calcineurin inhibitor	PPP3CA	5530	SIGNATURE	Homo sapiens	IN_VITRO
cyclosporin-a		cyclosporin-a inhibits T helper 2 compared to Mast cell	Mast cell	CL:0000097	Mast cell	CL:0000084	T cell	CL:0000097	T helper 2	CL:0000546	GSE3982_MAST_CELL_VS_TH2		0.013749423	-97.50093249	0.645873112	APPROVED	calcineurin inhibitor	PPP3CA	5530	SIGNATURE_DOWN	Homo sapiens	UNKNOWN
cyclosporin-a		cyclosporin-a inhibits Mast cell in Leukemia compared to Mast cell stimulated with A3R inhibitor in Leukemia	Mast cell	CL:0000097	Mast cell	CL:0000097	Mast cell	CL:0000097	Mast cell	CL:0000097	GSE19888_CTRL_VS_A3R_INHIBITOR_TREATED_MAST_CELL	0.013749423		-97.61283103	0.645873112	APPROVED	calcineurin inhibitor	PPP3CA	5530	SIGNATURE_UP	Homo sapiens	IN_VITRO
cyclosporin-a		cyclosporin-a inhibits T helper 2 compared to Mast cell	Mast cell	CL:0000097	Mast cell	CL:0000084	T cell	CL:0000097	T helper 2	CL:0000546	GSE3982_MAST_CELL_VS_TH2		0.013699855	-97.79932861	0.645873112	APPROVED	calcineurin inhibitor	PPP3CA	5530	SIGNATURE_DOWN	Homo sapiens	UNKNOWN
cyclosporin-a		cyclosporin-a inhibits Monocyte stimulated with HCMV compared to Monocyte stimulated with HCMV and PI3K inhibitor	Monocyte	CL:0000576	Monocyte	CL:0000576	Monocyte	CL:0000576	Monocyte	CL:0000576	GSE9601_UNTREATED_VS_PI3K_INHIBITOR_TREATED_HCMV_INF_MONOCYTE	0.011451558	0.322773327	-95.10463378	0.645873112	APPROVED	calcineurin inhibitor	PPP3CA	5530	SIGNATURE	Homo sapiens	IN_VITRO
cyclosporin-a		cyclosporin-a inhibits Monocyte compared to Monocyte stimulated with M. tuberculosis	Monocyte	CL:0000576	Monocyte	CL:0000576	Monocyte	CL:0000576	Monocyte	CL:0000576	GSE8921_UNSTIM_VS_TLR1_2_STIM_MONOCYTE_3H	0.013699855		-95.13241328	0.645873112	APPROVED	calcineurin inhibitor	PPP3CA	5530	SIGNATURE_UP	Homo sapiens	IN_VITRO
cyclosporin-a		cyclosporin-a inhibits Monocyte compared to Macrophage stimulated with IL4 and Rosiglitazone	Monocyte	CL:0000576	Monocyte	CL:0000235	Macrophage	CL:0000576	Macrophage	CL:0000235	GSE16385_MONOCYTE_VS_12H_ROSIGLITAZONE_IL4_TREATED_MACROPHAGE	0.013078284	0.759837431	-95.40358744	0.645873112	APPROVED	calcineurin inhibitor	PPP3CA	5530	SIGNATURE	Homo sapiens	EX_VIVO
cyclosporin-a		cyclosporin-a inhibits Monocyte compared to Monocyte stimulated with M. tuberculosis	Monocyte	CL:0000576	Monocyte	CL:0000576	Monocyte	CL:0000576	Monocyte	CL:0000576	GSE8921_UNSTIM_0H_VS_TLR1_2_STIM_MONOCYTE_12H	0.012270921		-95.65460649	0.645873112	APPROVED	calcineurin inhibitor	PPP3CA	5530	SIGNATURE_UP	Homo sapiens	IN_VITRO
cyclosporin-a		cyclosporin-a inhibits Monocyte compared to Monocyte stimulated with M. tuberculosis	Monocyte	CL:0000576	Monocyte	CL:0000576	Monocyte	CL:0000576	Monocyte	CL:0000576	GSE8921_UNSTIM_VS_TLR1_2_STIM_MONOCYTE_3H	0.013749423		-95.71055576	0.645873112	APPROVED	calcineurin inhibitor	PPP3CA	5530	SIGNATURE_UP	Homo sapiens	IN_VITRO
cyclosporin-a		cyclosporin-a inhibits Monocyte compared to Macrophage stimulated with IFNg, Rosiglitazone and TNF	Monocyte	CL:0000576	Monocyte	CL:0000235	Macrophage	CL:0000576	Macrophage	CL:0000235	GSE16385_MONOCYTE_VS_12H_ROSIGLITAZONE_IFNG_TNF_TREATED_MACROPHAGE	0.720404506	0.035225976	-96.03886398	0.645873112	APPROVED	calcineurin inhibitor	PPP3CA	5530	SIGNATURE	Homo sapiens	EX_VIVO
cyclosporin-a		cyclosporin-a inhibits Monocyte compared to Monocyte stimulated with M. tuberculosis	Monocyte	CL:0000576	Monocyte	CL:0000576	Monocyte	CL:0000576	Monocyte	CL:0000576	GSE8921_UNSTIM_VS_TLR1_2_STIM_MONOCYTE_3H	0.012270921		-96.12085043	0.645873112	APPROVED	calcineurin inhibitor	PPP3CA	5530	SIGNATURE_UP	Homo sapiens	IN_VITRO
cyclosporin-a		cyclosporin-a inhibits Monocyte compared to Macrophage stimulated with IL4 and Rosiglitazone	Monocyte	CL:0000576	Monocyte	CL:0000235	Macrophage	CL:0000576	Macrophage	CL:0000235	GSE16385_MONOCYTE_VS_12H_ROSIGLITAZONE_IL4_TREATED_MACROPHAGE	0.011451558	0.786652708	-96.67414051	0.645873112	APPROVED	calcineurin inhibitor	PPP3CA	5530	SIGNATURE	Homo sapiens	EX_VIVO
cyclosporin-a		cyclosporin-a inhibits Monocyte stimulated with LPS (low dose) compared to Monocyte stimulated with anti-TREM1 and LPS	Monocyte	CL:0000576	Monocyte	CL:0000576	Monocyte	CL:0000576	Monocyte	CL:0000576	GSE9988_LOW_LPS_VS_ANTI_TREM1_AND_LPS_MONOCYTE	0.419715501	0.018556658	-96.97309417	0.645873112	APPROVED	calcineurin inhibitor	PPP3CA	5530	SIGNATURE	Homo sapiens	EX_VIVO
cyclosporin-a		cyclosporin-a inhibits Monocyte compared to Monocyte stimulated with M. tuberculosis	Monocyte	CL:0000576	Monocyte	CL:0000576	Monocyte	CL:0000576	Monocyte	CL:0000576	GSE8921_UNSTIM_VS_TLR1_2_STIM_MONOCYTE_3H	0.024994406		-97.33308467	0.645873112	APPROVED	calcineurin inhibitor	PPP3CA	5530	SIGNATURE_UP	Homo sapiens	IN_VITRO
cyclosporin-a		cyclosporin-a inhibits Monocyte stimulated with HCMV compared to Monocyte stimulated with HCMV and PI3K inhibitor	Monocyte	CL:0000576	Monocyte	CL:0000576	Monocyte	CL:0000576	Monocyte	CL:0000576	GSE9601_UNTREATED_VS_PI3K_INHIBITOR_TREATED_HCMV_INF_MONOCYTE	0.02209671	0.096397695	-97.45889387	0.645873112	APPROVED	calcineurin inhibitor	PPP3CA	5530	SIGNATURE	Homo sapiens	IN_VITRO
cyclosporin-a		cyclosporin-a inhibits Monocyte stimulated with HCMV compared to Monocyte stimulated with HCMV and PI3K inhibitor	Monocyte	CL:0000576	Monocyte	CL:0000576	Monocyte	CL:0000576	Monocyte	CL:0000576	GSE9601_UNTREATED_VS_PI3K_INHIBITOR_TREATED_HCMV_INF_MONOCYTE	0.036313304	0.065502183	-97.64573991	0.645873112	APPROVED	calcineurin inhibitor	PPP3CA	5530	SIGNATURE	Homo sapiens	IN_VITRO
cyclosporin-a		cyclosporin-a inhibits Monocyte stimulated with LPS compared to Monocyte stimulated with LPS (low dose)	Monocyte	CL:0000576	Monocyte	CL:0000576	Monocyte	CL:0000576	Monocyte	CL:0000576	GSE9988_LPS_VS_LOW_LPS_MONOCYTE	0.636403712	0.286982346	-97.90732436	0.645873112	APPROVED	calcineurin inhibitor	PPP3CA	5530	SIGNATURE	Homo sapiens	EX_VIVO
cyclosporin-a		cyclosporin-a inhibits Monocyte compared to Macrophage stimulated with IL4 and Rosiglitazone	Monocyte	CL:0000576	Monocyte	CL:0000235	Macrophage	CL:0000576	Macrophage	CL:0000235	GSE16385_MONOCYTE_VS_12H_ROSIGLITAZONE_IL4_TREATED_MACROPHAGE	0.012891726	0.536087072	-98.61733931	0.645873112	APPROVED	calcineurin inhibitor	PPP3CA	5530	SIGNATURE	Homo sapiens	EX_VIVO
cyclosporin-a		cyclosporin-a inhibits Monocyte compared to Macrophage stimulated with IFNg, Rosiglitazone and TNF	Monocyte	CL:0000576	Monocyte	CL:0000235	Macrophage	CL:0000576	Macrophage	CL:0000235	GSE16385_MONOCYTE_VS_12H_ROSIGLITAZONE_IFNG_TNF_TREATED_MACROPHAGE	0.501108581	0.020226757	-99.17787743	0.645873112	APPROVED	calcineurin inhibitor	PPP3CA	5530	SIGNATURE	Homo sapiens	EX_VIVO
cyclosporin-a		cyclosporin-a inhibits Neutrophil compared to Neutrophil stimulated with F.tularensis	Neutrophil	CL:0000775	Neutrophil	CL:0000775	Neutrophil	CL:0000775	Neutrophil	CL:0000775	GSE37416_CTRL_VS_24H_F_TULARENSIS_LVS_NEUTROPHIL	0.674295159	0.018556658	-95.10463378	0.645873112	APPROVED	calcineurin inhibitor	PPP3CA	5530	SIGNATURE	Homo sapiens	IN_VITRO
cyclosporin-a		cyclosporin-a inhibits Neutrophil compared to Neutrophil stimulated with F.tularensis	Neutrophil	CL:0000775	Neutrophil	CL:0000775	Neutrophil	CL:0000775	Neutrophil	CL:0000775	GSE37416_0H_VS_24H_F_TULARENSIS_LVS_NEUTROPHIL	0.485912638	0.071321962	-95.44095665	0.645873112	APPROVED	calcineurin inhibitor	PPP3CA	5530	SIGNATURE	Homo sapiens	IN_VITRO
cyclosporin-a		cyclosporin-a inhibits Neutrophil compared to Neutrophil stimulated with F.tularensis	Neutrophil	CL:0000775	Neutrophil	CL:0000775	Neutrophil	CL:0000775	Neutrophil	CL:0000775	GSE37416_0H_VS_3H_F_TULARENSIS_LVS_NEUTROPHIL	0.018653809		-95.69190601	0.645873112	APPROVED	calcineurin inhibitor	PPP3CA	5530	SIGNATURE_UP	Homo sapiens	IN_VITRO
cyclosporin-a		cyclosporin-a inhibits Neutrophil stimulated with A.phagocytophilum compared to Neutrophil	Neutrophil	CL:0000775	Neutrophil	CL:0000775	Neutrophil	CL:0000775	Neutrophil	CL:0000775	GSE2405_0H_VS_12H_A_PHAGOCYTOPHILUM_STIM_NEUTROPHIL		0.018664263	-95.89705334	0.645873112	APPROVED	calcineurin inhibitor	PPP3CA	5530	SIGNATURE_DOWN	Homo sapiens	EX_VIVO
cyclosporin-a		cyclosporin-a inhibits Neutrophil stimulated with A.phagocytophilum compared to Neutrophil	Neutrophil	CL:0000775	Neutrophil	CL:0000775	Neutrophil	CL:0000775	Neutrophil	CL:0000775	GSE2405_0H_VS_9H_A_PHAGOCYTOPHILUM_STIM_NEUTROPHIL		0.018653809	-95.95300261	0.645873112	APPROVED	calcineurin inhibitor	PPP3CA	5530	SIGNATURE_DOWN	Homo sapiens	EX_VIVO
cyclosporin-a		cyclosporin-a inhibits Neutrophil stimulated with HL60 lysate compared to Neutrophil stimulated with A.phagocytophilum	Neutrophil	CL:0000775	Neutrophil	CL:0000775	Neutrophil	CL:0000775	Neutrophil	CL:0000775	GSE2405_HEAT_KILLED_LYSATE_VS_LIVE_A_PHAGOCYTOPHILUM_STIM_NEUTROPHIL_9H	0.012270921		-96.00895188	0.645873112	APPROVED	calcineurin inhibitor	PPP3CA	5530	SIGNATURE_UP	Homo sapiens	EX_VIVO
cyclosporin-a		cyclosporin-a inhibits Neutrophil stimulated with A.phagocytophilum compared to Neutrophil	Neutrophil	CL:0000775	Neutrophil	CL:0000775	Neutrophil	CL:0000775	Neutrophil	CL:0000775	GSE2405_0H_VS_12H_A_PHAGOCYTOPHILUM_STIM_NEUTROPHIL		0.013749423	-96.00895188	0.645873112	APPROVED	calcineurin inhibitor	PPP3CA	5530	SIGNATURE_DOWN	Homo sapiens	EX_VIVO
cyclosporin-a		cyclosporin-a inhibits Neutrophil stimulated with HL60 lysate compared to Neutrophil stimulated with A.phagocytophilum	Neutrophil	CL:0000775	Neutrophil	CL:0000775	Neutrophil	CL:0000775	Neutrophil	CL:0000775	GSE2405_HEAT_KILLED_LYSATE_VS_LIVE_A_PHAGOCYTOPHILUM_STIM_NEUTROPHIL_9H	0.013699855		-96.15814994	0.645873112	APPROVED	calcineurin inhibitor	PPP3CA	5530	SIGNATURE_UP	Homo sapiens	EX_VIVO
cyclosporin-a		cyclosporin-a inhibits Neutrophil stimulated with HL60 lysate compared to Neutrophil stimulated with A.phagocytophilum	Neutrophil	CL:0000775	Neutrophil	CL:0000775	Neutrophil	CL:0000775	Neutrophil	CL:0000775	GSE2405_HEAT_KILLED_LYSATE_VS_LIVE_A_PHAGOCYTOPHILUM_STIM_NEUTROPHIL_9H	0.018664263		-96.1767997	0.645873112	APPROVED	calcineurin inhibitor	PPP3CA	5530	SIGNATURE_UP	Homo sapiens	EX_VIVO
cyclosporin-a		cyclosporin-a inhibits Neutrophil compared to Neutrophil stimulated with F.tularensis	Neutrophil	CL:0000775	Neutrophil	CL:0000775	Neutrophil	CL:0000775	Neutrophil	CL:0000775	GSE37416_CTRL_VS_24H_F_TULARENSIS_LVS_NEUTROPHIL	0.052652981	0.013413534	-96.18834081	0.645873112	APPROVED	calcineurin inhibitor	PPP3CA	5530	SIGNATURE	Homo sapiens	IN_VITRO
cyclosporin-a		cyclosporin-a inhibits Neutrophil stimulated with A.phagocytophilum compared to Neutrophil	Neutrophil	CL:0000775	Neutrophil	CL:0000775	Neutrophil	CL:0000775	Neutrophil	CL:0000775	GSE2405_0H_VS_12H_A_PHAGOCYTOPHILUM_STIM_NEUTROPHIL		0.013699855	-96.51249534	0.645873112	APPROVED	calcineurin inhibitor	PPP3CA	5530	SIGNATURE_DOWN	Homo sapiens	EX_VIVO
cyclosporin-a		cyclosporin-a inhibits Neutrophil stimulated with A.phagocytophilum compared to Neutrophil	Neutrophil	CL:0000775	Neutrophil	CL:0000775	Neutrophil	CL:0000775	Neutrophil	CL:0000775	GSE2405_0H_VS_12H_A_PHAGOCYTOPHILUM_STIM_NEUTROPHIL		0.012270921	-96.64304364	0.645873112	APPROVED	calcineurin inhibitor	PPP3CA	5530	SIGNATURE_DOWN	Homo sapiens	EX_VIVO
cyclosporin-a		cyclosporin-a inhibits Neutrophil compared to Neutrophil stimulated with F.tularensis	Neutrophil	CL:0000775	Neutrophil	CL:0000775	Neutrophil	CL:0000775	Neutrophil	CL:0000775	GSE37416_CTRL_VS_48H_F_TULARENSIS_LVS_NEUTROPHIL	0.029936904	0.018556658	-96.78624813	0.645873112	APPROVED	calcineurin inhibitor	PPP3CA	5530	SIGNATURE	Homo sapiens	IN_VITRO
cyclosporin-a		cyclosporin-a inhibits Neutrophil compared to Neutrophil stimulated with F.tularensis	Neutrophil	CL:0000775	Neutrophil	CL:0000775	Neutrophil	CL:0000775	Neutrophil	CL:0000775	GSE37416_0H_VS_48H_F_TULARENSIS_LVS_NEUTROPHIL	0.883179046	0.020226757	-96.97309417	0.645873112	APPROVED	calcineurin inhibitor	PPP3CA	5530	SIGNATURE	Homo sapiens	IN_VITRO
cyclosporin-a		cyclosporin-a inhibits Neutrophil compared to Neutrophil stimulated with F.tularensis	Neutrophil	CL:0000775	Neutrophil	CL:0000775	Neutrophil	CL:0000775	Neutrophil	CL:0000775	GSE37416_0H_VS_3H_F_TULARENSIS_LVS_NEUTROPHIL	0.044213448	0.101386679	-97.08520179	0.645873112	APPROVED	calcineurin inhibitor	PPP3CA	5530	SIGNATURE	Homo sapiens	IN_VITRO
cyclosporin-a		cyclosporin-a inhibits Neutrophil stimulated with A.phagocytophilum compared to Neutrophil	Neutrophil	CL:0000775	Neutrophil	CL:0000775	Neutrophil	CL:0000775	Neutrophil	CL:0000775	GSE2405_0H_VS_9H_A_PHAGOCYTOPHILUM_STIM_NEUTROPHIL		0.012270921	-97.14658709	0.645873112	APPROVED	calcineurin inhibitor	PPP3CA	5530	SIGNATURE_DOWN	Homo sapiens	EX_VIVO
cyclosporin-a		cyclosporin-a inhibits Neutrophil stimulated with LPS compared to Neutrophil stimulated with IFNg and GM-CSF	Neutrophil	CL:0000775	Neutrophil	CL:0000775	Neutrophil	CL:0000775	Neutrophil	CL:0000775	GSE22103_LPS_VS_GMCSF_AND_IFNG_STIM_NEUTROPHIL	0.016838661	0.159396901	-97.23467862	0.645873112	APPROVED	calcineurin inhibitor	PPP3CA	5530	SIGNATURE	Homo sapiens	IN_VIVO
cyclosporin-a		cyclosporin-a inhibits Neutrophil stimulated with LPS compared to Neutrophil stimulated with IFNg and GM-CSF	Neutrophil	CL:0000775	Neutrophil	CL:0000775	Neutrophil	CL:0000775	Neutrophil	CL:0000775	GSE22103_LPS_VS_GMCSF_AND_IFNG_STIM_NEUTROPHIL	0.058705839	0.154128165	-97.38415546	0.645873112	APPROVED	calcineurin inhibitor	PPP3CA	5530	SIGNATURE	Homo sapiens	IN_VIVO
cyclosporin-a		cyclosporin-a inhibits Neutrophil stimulated with A.phagocytophilum compared to Neutrophil	Neutrophil	CL:0000775	Neutrophil	CL:0000775	Neutrophil	CL:0000775	Neutrophil	CL:0000775	GSE2405_0H_VS_12H_A_PHAGOCYTOPHILUM_STIM_NEUTROPHIL		0.024994406	-97.42633346	0.645873112	APPROVED	calcineurin inhibitor	PPP3CA	5530	SIGNATURE_DOWN	Homo sapiens	EX_VIVO
cyclosporin-a		cyclosporin-a inhibits Neutrophil stimulated with LPS compared to Neutrophil stimulated with IFNg and GM-CSF	Neutrophil	CL:0000775	Neutrophil	CL:0000775	Neutrophil	CL:0000775	Neutrophil	CL:0000775	GSE22103_LPS_VS_GMCSF_AND_IFNG_STIM_NEUTROPHIL	0.125590002	0.026924644	-97.49626308	0.645873112	APPROVED	calcineurin inhibitor	PPP3CA	5530	SIGNATURE	Homo sapiens	IN_VIVO
cyclosporin-a		cyclosporin-a inhibits Neutrophil stimulated with A.phagocytophilum compared to Neutrophil	Neutrophil	CL:0000775	Neutrophil	CL:0000775	Neutrophil	CL:0000775	Neutrophil	CL:0000775	GSE2405_0H_VS_9H_A_PHAGOCYTOPHILUM_STIM_NEUTROPHIL		0.013699855	-97.51958225	0.645873112	APPROVED	calcineurin inhibitor	PPP3CA	5530	SIGNATURE_DOWN	Homo sapiens	EX_VIVO
cyclosporin-a		cyclosporin-a inhibits Neutrophil stimulated with HL60 lysate compared to Neutrophil stimulated with A.phagocytophilum	Neutrophil	CL:0000775	Neutrophil	CL:0000775	Neutrophil	CL:0000775	Neutrophil	CL:0000775	GSE2405_HEAT_KILLED_LYSATE_VS_LIVE_A_PHAGOCYTOPHILUM_STIM_NEUTROPHIL_9H	0.024994406		-97.66878031	0.645873112	APPROVED	calcineurin inhibitor	PPP3CA	5530	SIGNATURE_UP	Homo sapiens	EX_VIVO
cyclosporin-a		cyclosporin-a inhibits Neutrophil compared to Neutrophil stimulated with F.tularensis	Neutrophil	CL:0000775	Neutrophil	CL:0000775	Neutrophil	CL:0000775	Neutrophil	CL:0000775	GSE37416_0H_VS_48H_F_TULARENSIS_LVS_NEUTROPHIL	0.495824521	0.013413534	-97.68310912	0.645873112	APPROVED	calcineurin inhibitor	PPP3CA	5530	SIGNATURE	Homo sapiens	IN_VITRO
cyclosporin-a		cyclosporin-a inhibits Neutrophil stimulated with A.phagocytophilum compared to Neutrophil	Neutrophil	CL:0000775	Neutrophil	CL:0000775	Neutrophil	CL:0000775	Neutrophil	CL:0000775	GSE2405_0H_VS_9H_A_PHAGOCYTOPHILUM_STIM_NEUTROPHIL		0.013749423	-97.85527788	0.645873112	APPROVED	calcineurin inhibitor	PPP3CA	5530	SIGNATURE_DOWN	Homo sapiens	EX_VIVO
cyclosporin-a		cyclosporin-a inhibits Neutrophil compared to Neutrophil stimulated with F.tularensis	Neutrophil	CL:0000775	Neutrophil	CL:0000775	Neutrophil	CL:0000775	Neutrophil	CL:0000775	GSE37416_0H_VS_24H_F_TULARENSIS_LVS_NEUTROPHIL	0.098682159	0.013413534	-97.94469357	0.645873112	APPROVED	calcineurin inhibitor	PPP3CA	5530	SIGNATURE	Homo sapiens	IN_VITRO
cyclosporin-a		cyclosporin-a inhibits Neutrophil compared to Neutrophil stimulated with F.tularensis	Neutrophil	CL:0000775	Neutrophil	CL:0000775	Neutrophil	CL:0000775	Neutrophil	CL:0000775	GSE37416_0H_VS_48H_F_TULARENSIS_LVS_NEUTROPHIL	0.270558819	0.019554256	-98.01943199	0.645873112	APPROVED	calcineurin inhibitor	PPP3CA	5530	SIGNATURE	Homo sapiens	IN_VITRO
cyclosporin-a		cyclosporin-a inhibits Neutrophil compared to Neutrophil stimulated with F.tularensis	Neutrophil	CL:0000775	Neutrophil	CL:0000775	Neutrophil	CL:0000775	Neutrophil	CL:0000775	GSE37416_0H_VS_24H_F_TULARENSIS_LVS_NEUTROPHIL	0.071432131	0.026747161	-98.0568012	0.645873112	APPROVED	calcineurin inhibitor	PPP3CA	5530	SIGNATURE	Homo sapiens	IN_VITRO
cyclosporin-a		cyclosporin-a inhibits Neutrophil compared to Neutrophil stimulated with F.tularensis	Neutrophil	CL:0000775	Neutrophil	CL:0000775	Neutrophil	CL:0000775	Neutrophil	CL:0000775	GSE37416_CTRL_VS_24H_F_TULARENSIS_LVS_NEUTROPHIL	0.011451558	0.026747161	-98.20627803	0.645873112	APPROVED	calcineurin inhibitor	PPP3CA	5530	SIGNATURE	Homo sapiens	IN_VITRO
cyclosporin-a		cyclosporin-a inhibits Neutrophil compared to Neutrophil stimulated with F.tularensis	Neutrophil	CL:0000775	Neutrophil	CL:0000775	Neutrophil	CL:0000775	Neutrophil	CL:0000775	GSE37416_0H_VS_3H_F_TULARENSIS_LVS_NEUTROPHIL	0.269335019	0.018556658	-98.61733931	0.645873112	APPROVED	calcineurin inhibitor	PPP3CA	5530	SIGNATURE	Homo sapiens	IN_VITRO
cyclosporin-a		cyclosporin-a inhibits Neutrophil compared to Neutrophil stimulated with S.aureus	Neutrophil	CL:0000775	Neutrophil	CL:0000775	Neutrophil	CL:0000775	Neutrophil	CL:0000775	GSE2405_S_AUREUS_VS_UNTREATED_NEUTROPHIL		0.012270921	-98.61991794	0.645873112	APPROVED	calcineurin inhibitor	PPP3CA	5530	SIGNATURE_DOWN	Homo sapiens	EX_VIVO
cyclosporin-a		cyclosporin-a inhibits Neutrophil compared to Neutrophil stimulated with S.aureus	Neutrophil	CL:0000775	Neutrophil	CL:0000775	Neutrophil	CL:0000775	Neutrophil	CL:0000775	GSE2405_S_AUREUS_VS_UNTREATED_NEUTROPHIL		0.013749423	-98.65721746	0.645873112	APPROVED	calcineurin inhibitor	PPP3CA	5530	SIGNATURE_DOWN	Homo sapiens	EX_VIVO
cyclosporin-a		cyclosporin-a inhibits Neutrophil stimulated with LPS compared to Neutrophil stimulated with IFNg and GM-CSF	Neutrophil	CL:0000775	Neutrophil	CL:0000775	Neutrophil	CL:0000775	Neutrophil	CL:0000775	GSE22103_LPS_VS_GMCSF_AND_IFNG_STIM_NEUTROPHIL	0.013078284	0.028639618	-98.69207773	0.645873112	APPROVED	calcineurin inhibitor	PPP3CA	5530	SIGNATURE	Homo sapiens	IN_VIVO
cyclosporin-a		cyclosporin-a inhibits Neutrophil compared to Neutrophil stimulated with S.aureus	Neutrophil	CL:0000775	Neutrophil	CL:0000775	Neutrophil	CL:0000775	Neutrophil	CL:0000775	GSE2405_S_AUREUS_VS_UNTREATED_NEUTROPHIL		0.018664263	-98.71316673	0.645873112	APPROVED	calcineurin inhibitor	PPP3CA	5530	SIGNATURE_DOWN	Homo sapiens	EX_VIVO
cyclosporin-a		cyclosporin-a inhibits Neutrophil compared to Neutrophil stimulated with LPS	Neutrophil	CL:0000775	Neutrophil	CL:0000775	Neutrophil	CL:0000775	Neutrophil	CL:0000775	GSE22103_UNSTIM_VS_LPS_STIM_NEUTROPHIL	0.105662165	0.029049066	-98.72944694	0.645873112	APPROVED	calcineurin inhibitor	PPP3CA	5530	SIGNATURE	Homo sapiens	IN_VIVO
cyclosporin-a		cyclosporin-a inhibits Neutrophil stimulated with LPS compared to Neutrophil stimulated with IFNg and GM-CSF	Neutrophil	CL:0000775	Neutrophil	CL:0000775	Neutrophil	CL:0000775	Neutrophil	CL:0000775	GSE22103_LPS_VS_GMCSF_AND_IFNG_STIM_NEUTROPHIL	0.036313304	0.046911979	-98.84155456	0.645873112	APPROVED	calcineurin inhibitor	PPP3CA	5530	SIGNATURE	Homo sapiens	IN_VIVO
cyclosporin-a		cyclosporin-a inhibits Neutrophil compared to Neutrophil stimulated with S.aureus	Neutrophil	CL:0000775	Neutrophil	CL:0000775	Neutrophil	CL:0000775	Neutrophil	CL:0000775	GSE2405_S_AUREUS_VS_UNTREATED_NEUTROPHIL		0.013699855	-98.8996643	0.645873112	APPROVED	calcineurin inhibitor	PPP3CA	5530	SIGNATURE_DOWN	Homo sapiens	EX_VIVO
cyclosporin-a		cyclosporin-a inhibits Neutrophil compared to Neutrophil stimulated with F.tularensis	Neutrophil	CL:0000775	Neutrophil	CL:0000775	Neutrophil	CL:0000775	Neutrophil	CL:0000775	GSE37416_0H_VS_3H_F_TULARENSIS_LVS_NEUTROPHIL	0.011451558	0.049315735	-98.99103139	0.645873112	APPROVED	calcineurin inhibitor	PPP3CA	5530	SIGNATURE	Homo sapiens	IN_VITRO
cyclosporin-a		cyclosporin-a inhibits Neutrophil stimulated with LPS compared to Neutrophil stimulated with IFNg and GM-CSF	Neutrophil	CL:0000775	Neutrophil	CL:0000775	Neutrophil	CL:0000775	Neutrophil	CL:0000775	GSE22103_LPS_VS_GMCSF_AND_IFNG_STIM_NEUTROPHIL	0.011451558	0.078119729	-99.0284006	0.645873112	APPROVED	calcineurin inhibitor	PPP3CA	5530	SIGNATURE	Homo sapiens	IN_VIVO
cyclosporin-a		cyclosporin-a inhibits Neutrophil compared to Neutrophil stimulated with F.tularensis	Neutrophil	CL:0000775	Neutrophil	CL:0000775	Neutrophil	CL:0000775	Neutrophil	CL:0000775	GSE37416_0H_VS_48H_F_TULARENSIS_LVS_NEUTROPHIL	0.550650969	0.018556658	-99.06576981	0.645873112	APPROVED	calcineurin inhibitor	PPP3CA	5530	SIGNATURE	Homo sapiens	IN_VITRO
cyclosporin-a		cyclosporin-a inhibits Neutrophil compared to Neutrophil stimulated with S.aureus	Neutrophil	CL:0000775	Neutrophil	CL:0000775	Neutrophil	CL:0000775	Neutrophil	CL:0000775	GSE2405_S_AUREUS_VS_UNTREATED_NEUTROPHIL		0.024994406	-99.06751212	0.645873112	APPROVED	calcineurin inhibitor	PPP3CA	5530	SIGNATURE_DOWN	Homo sapiens	EX_VIVO
cyclosporin-a		cyclosporin-a inhibits Neutrophil compared to Neutrophil stimulated with F.tularensis	Neutrophil	CL:0000775	Neutrophil	CL:0000775	Neutrophil	CL:0000775	Neutrophil	CL:0000775	GSE37416_0H_VS_3H_F_TULARENSIS_LVS_NEUTROPHIL	0.017624975	0.194699487	-99.17787743	0.645873112	APPROVED	calcineurin inhibitor	PPP3CA	5530	SIGNATURE	Homo sapiens	IN_VITRO
cyclosporin-a		cyclosporin-a inhibits Neutrophil stimulated with HL60 lysate compared to Neutrophil stimulated with A.phagocytophilum	Neutrophil	CL:0000775	Neutrophil	CL:0000775	Neutrophil	CL:0000775	Neutrophil	CL:0000775	GSE2405_HEAT_KILLED_LYSATE_VS_LIVE_A_PHAGOCYTOPHILUM_STIM_NEUTROPHIL_9H	0.012891726	0.667265986	-99.28998505	0.645873112	APPROVED	calcineurin inhibitor	PPP3CA	5530	SIGNATURE	Homo sapiens	EX_VIVO
cyclosporin-a		cyclosporin-a inhibits Neutrophil compared to Neutrophil stimulated with F.tularensis	Neutrophil	CL:0000775	Neutrophil	CL:0000775	Neutrophil	CL:0000775	Neutrophil	CL:0000775	GSE37416_0H_VS_3H_F_TULARENSIS_LVS_NEUTROPHIL	0.013078284	0.020887973	-99.28998505	0.645873112	APPROVED	calcineurin inhibitor	PPP3CA	5530	SIGNATURE	Homo sapiens	IN_VITRO
cyclosporin-a		cyclosporin-a boosts CD62L- CD56+ dim NK cell compared to CD62L+ CD56+ dim NK cell	NK cell	CL:0000623	NK cell	CL:0000623	NK cell	CL:0000623	NK cell	CL:0000623	GSE21774_CD62L_POS_CD56_DIM_VS_CD62L_NEG_CD56_DIM_NK_CELL		0.018653809	99.40320776	0.645873112	APPROVED	calcineurin inhibitor	PPP3CA	5530	SIGNATURE_DOWN	Homo sapiens	EX_VIVO
cyclosporin-a		cyclosporin-a inhibits CD57+ NK cell compared to CD57- NK cell	NK cell	CL:0000623	NK cell	CL:0000623	NK cell	CL:0000623	NK cell	CL:0000623	GSE23695_CD57_POS_VS_NEG_NK_CELL	0.013699855		-95.03916449	0.645873112	APPROVED	calcineurin inhibitor	PPP3CA	5530	SIGNATURE_UP	Homo sapiens	EX_VIVO
cyclosporin-a		cyclosporin-a inhibits NK cell stimulated with IL2 compared to NK cell	NK cell	CL:0000623	NK cell	CL:0000623	NK cell	CL:0000623	NK cell	CL:0000623	GSE22886_UNSTIM_VS_IL2_STIM_NKCELL		0.012270921	-95.11376352	0.645873112	APPROVED	calcineurin inhibitor	PPP3CA	5530	SIGNATURE_DOWN	Homo sapiens	IN_SILICO
cyclosporin-a		cyclosporin-a inhibits CD57+ NK cell compared to CD57- NK cell	NK cell	CL:0000623	NK cell	CL:0000623	NK cell	CL:0000623	NK cell	CL:0000623	GSE23695_CD57_POS_VS_NEG_NK_CELL	0.013749423		-95.18836255	0.645873112	APPROVED	calcineurin inhibitor	PPP3CA	5530	SIGNATURE_UP	Homo sapiens	EX_VIVO
cyclosporin-a		cyclosporin-a inhibits NK cell in Sleep apnea syndrome compared to Hematopoietic stem and progenitor cells in Sleep apnea syndrome	NK cell	CL:0000623	NK cell	CL:0000837	Hematopoietic stem and progenitor cells	CL:0000623	Hematopoietic stem and progenitor cells	CL:0000837	GSE70580_NK_vs_ILC1_ILC2_ILC3	0.018664263		-95.78515479	0.645873112	APPROVED	calcineurin inhibitor	PPP3CA	5530	SIGNATURE_UP	Homo sapiens	PATIENT
cyclosporin-a		cyclosporin-a inhibits T helper 1 compared to NK cell	NK cell	CL:0000623	NK cell	CL:0000084	T cell	CL:0000623	T helper 1	CL:0000545	GSE3982_NKCELL_VS_TH1		0.013699855	-96.06490116	0.645873112	APPROVED	calcineurin inhibitor	PPP3CA	5530	SIGNATURE_DOWN	Homo sapiens	UNKNOWN
cyclosporin-a		cyclosporin-a inhibits T helper 2 compared to NK cell	NK cell	CL:0000623	NK cell	CL:0000084	T cell	CL:0000623	T helper 2	CL:0000546	GSE3982_NKCELL_VS_TH2		0.018653809	-96.23274897	0.645873112	APPROVED	calcineurin inhibitor	PPP3CA	5530	SIGNATURE_DOWN	Homo sapiens	UNKNOWN
cyclosporin-a		cyclosporin-a inhibits T helper 1 compared to NK cell	NK cell	CL:0000623	NK cell	CL:0000084	T cell	CL:0000623	T helper 1	CL:0000545	GSE3982_NKCELL_VS_TH1		0.013749423	-96.32599776	0.645873112	APPROVED	calcineurin inhibitor	PPP3CA	5530	SIGNATURE_DOWN	Homo sapiens	UNKNOWN
cyclosporin-a		cyclosporin-a inhibits T helper 2 compared to NK cell	NK cell	CL:0000623	NK cell	CL:0000084	T cell	CL:0000623	T helper 2	CL:0000546	GSE3982_NKCELL_VS_TH2		0.024994406	-96.68034316	0.645873112	APPROVED	calcineurin inhibitor	PPP3CA	5530	SIGNATURE_DOWN	Homo sapiens	UNKNOWN
cyclosporin-a		cyclosporin-a inhibits T helper 1 compared to NK cell	NK cell	CL:0000623	NK cell	CL:0000084	T cell	CL:0000623	T helper 1	CL:0000545	GSE3982_NKCELL_VS_TH1		0.012270921	-96.81089146	0.645873112	APPROVED	calcineurin inhibitor	PPP3CA	5530	SIGNATURE_DOWN	Homo sapiens	UNKNOWN
cyclosporin-a		cyclosporin-a inhibits T helper 2 compared to NK cell	NK cell	CL:0000623	NK cell	CL:0000084	T cell	CL:0000623	T helper 2	CL:0000546	GSE3982_NKCELL_VS_TH2		0.013699855	-97.20253637	0.645873112	APPROVED	calcineurin inhibitor	PPP3CA	5530	SIGNATURE_DOWN	Homo sapiens	UNKNOWN
cyclosporin-a		cyclosporin-a inhibits NK cell in Sleep apnea syndrome compared to Hematopoietic stem and progenitor cells in Sleep apnea syndrome	NK cell	CL:0000623	NK cell	CL:0000837	Hematopoietic stem and progenitor cells	CL:0000623	Hematopoietic stem and progenitor cells	CL:0000837	GSE70580_NK_vs_ILC1_ILC2_ILC3	0.025009346	0.753237005	-97.45889387	0.645873112	APPROVED	calcineurin inhibitor	PPP3CA	5530	SIGNATURE	Homo sapiens	PATIENT
cyclosporin-a		cyclosporin-a inhibits NK cell in Sleep apnea syndrome compared to Hematopoietic stem and progenitor cells in Sleep apnea syndrome	NK cell	CL:0000623	NK cell	CL:0000837	Hematopoietic stem and progenitor cells	CL:0000623	Hematopoietic stem and progenitor cells	CL:0000837	GSE70580_NK_vs_ILC1_ILC2_ILC3	0.024994406		-97.94852667	0.645873112	APPROVED	calcineurin inhibitor	PPP3CA	5530	SIGNATURE_UP	Homo sapiens	PATIENT
cyclosporin-a		cyclosporin-a inhibits T helper 2 compared to NK cell	NK cell	CL:0000623	NK cell	CL:0000084	T cell	CL:0000623	T helper 2	CL:0000546	GSE3982_NKCELL_VS_TH2		0.013749423	-98.0231257	0.645873112	APPROVED	calcineurin inhibitor	PPP3CA	5530	SIGNATURE_DOWN	Homo sapiens	UNKNOWN
cyclosporin-a		cyclosporin-a inhibits CD57+ NK cell compared to CD57- NK cell	NK cell	CL:0000623	NK cell	CL:0000623	NK cell	CL:0000623	NK cell	CL:0000623	GSE23695_CD57_POS_VS_NEG_NK_CELL	0.013078284	0.491835794	-98.16890882	0.645873112	APPROVED	calcineurin inhibitor	PPP3CA	5530	SIGNATURE	Homo sapiens	EX_VIVO
cyclosporin-a		cyclosporin-a inhibits T helper 2 compared to NK cell	NK cell	CL:0000623	NK cell	CL:0000084	T cell	CL:0000623	T helper 2	CL:0000546	GSE3982_NKCELL_VS_TH2		0.012270921	-98.20962327	0.645873112	APPROVED	calcineurin inhibitor	PPP3CA	5530	SIGNATURE_DOWN	Homo sapiens	UNKNOWN
cyclosporin-a		cyclosporin-a inhibits NK cell in Sleep apnea syndrome compared to Hematopoietic stem and progenitor cells in Sleep apnea syndrome	NK cell	CL:0000623	NK cell	CL:0000837	Hematopoietic stem and progenitor cells	CL:0000623	Hematopoietic stem and progenitor cells	CL:0000837	GSE70580_NK_vs_ILC1_ILC2_ILC3	0.02209671	0.074456652	-98.5426009	0.645873112	APPROVED	calcineurin inhibitor	PPP3CA	5530	SIGNATURE	Homo sapiens	PATIENT
cyclosporin-a		cyclosporin-a inhibits Other in Arthritis compared to Other	Other		Other		Other		Other		GSE89408_RA_GPL11154_Synovial_membrane	0.012575784		-95.07646401	0.645873112	APPROVED	calcineurin inhibitor	PPP3CA	5530	SIGNATURE_UP	Homo sapiens	PATIENT
cyclosporin-a		cyclosporin-a inhibits bone marrow Thymic compared to fetal Thymic	Other		Thymic		Other	CL:0000893	Thymic	CL:0000893	GSE25085_FETAL_LIVER_VS_ADULT_BM_SP4_THYMIC_IMPLANT		0.018664263	-95.3002611	0.645873112	APPROVED	calcineurin inhibitor	PPP3CA	5530	SIGNATURE_DOWN	Homo sapiens	IN_VIVO
cyclosporin-a		cyclosporin-a inhibits Cell line in Gastric adenocarcinoma compared to Cell line stimulated with H.pylori and LPS in Gastric adenocarcinoma	Other		Cell line		Other		Cell line		GSE25146_UNSTIM_VS_HELIOBACTER_PYLORI_LPS_STIM_AGS_CELL	0.025009346	0.860955215	-95.47832586	0.645873112	APPROVED	calcineurin inhibitor	PPP3CA	5530	SIGNATURE	Homo sapiens	IN_VITRO
cyclosporin-a		cyclosporin-a inhibits ontheraphy non-responders Melanoma stimulated with anti-PD1 in Melanoma compared to pre-theraphy Melanoma stimulated with anti-PD1 in Melanoma	Other		Melanoma		Other		Melanoma		Riaz_Pretherapy_vs_ontherapy_in_responders_vs_non_responders		0.012270921	-95.82245431	0.645873112	APPROVED	calcineurin inhibitor	PPP3CA	5530	SIGNATURE_DOWN	Homo sapiens	PATIENT
cyclosporin-a		cyclosporin-a inhibits Cell line in Gastric adenocarcinoma compared to Cell line stimulated with H.pylori and LPS in Gastric adenocarcinoma	Other		Cell line		Other		Cell line		GSE25146_UNSTIM_VS_HELIOBACTER_PYLORI_LPS_STIM_AGS_CELL	0.013749423		-95.89705334	0.645873112	APPROVED	calcineurin inhibitor	PPP3CA	5530	SIGNATURE_UP	Homo sapiens	IN_VITRO
cyclosporin-a		cyclosporin-a inhibits Epithelial stimulated with IFNa and IFNg compared to Epithelial stimulated with IFNa	Other		Epithelial		Other	CL:0000066	Epithelial	CL:0000066	GSE5542_IFNA_VS_IFNA_AND_IFNG_TREATED_EPITHELIAL_CELLS_24H		0.024994406	-95.93435285	0.645873112	APPROVED	calcineurin inhibitor	PPP3CA	5530	SIGNATURE_DOWN	Homo sapiens	IN_VITRO
cyclosporin-a		cyclosporin-a inhibits Cell line in Gastric adenocarcinoma compared to Cell line stimulated with H.pylori and LPS in Gastric adenocarcinoma	Other		Cell line		Other		Cell line		GSE25146_UNSTIM_VS_HELIOBACTER_PYLORI_LPS_STIM_AGS_CELL	0.012270921		-96.32599776	0.645873112	APPROVED	calcineurin inhibitor	PPP3CA	5530	SIGNATURE_UP	Homo sapiens	IN_VITRO
cyclosporin-a		cyclosporin-a inhibits Other in Lupus erythematosus compared to Other	Other		Other		Other		Other		GSE80183_SLE_GPL11154_PBLs	0.012891726	0.154527553	-96.48729447	0.645873112	APPROVED	calcineurin inhibitor	PPP3CA	5530	SIGNATURE	Homo sapiens	PATIENT
cyclosporin-a		cyclosporin-a inhibits Cell line in Stomach Cancer compared to Cell line stimulated with H.pylori and LPS in Stomach Cancer	Other		Cell line		Other		Cell line		GSE25147_UNSTIM_VS_HELIOBACTER_PYLORI_LPS_STIM_MKN45_CELL	0.058705839	0.812618801	-96.52466368	0.645873112	APPROVED	calcineurin inhibitor	PPP3CA	5530	SIGNATURE	Homo sapiens	IN_VITRO
cyclosporin-a		cyclosporin-a inhibits Cell line in Stomach Cancer compared to Cell line stimulated with H.pylori and LPS in Stomach Cancer	Other		Cell line		Other		Cell line		GSE25147_UNSTIM_VS_HELIOBACTER_PYLORI_LPS_STIM_MKN45_CELL	0.060445549	0.865357228	-96.6367713	0.645873112	APPROVED	calcineurin inhibitor	PPP3CA	5530	SIGNATURE	Homo sapiens	IN_VITRO
cyclosporin-a		cyclosporin-a inhibits Cell line in Gastric adenocarcinoma compared to Cell line stimulated with H.pylori and LPS in Gastric adenocarcinoma	Other		Cell line		Other		Cell line		GSE25146_UNSTIM_VS_HELIOBACTER_PYLORI_LPS_STIM_AGS_CELL	0.013699855		-97.10928758	0.645873112	APPROVED	calcineurin inhibitor	PPP3CA	5530	SIGNATURE_UP	Homo sapiens	IN_VITRO
cyclosporin-a		cyclosporin-a inhibits Cell line in Gastric adenocarcinoma compared to Cell line stimulated with H.pylori and LPS in Gastric adenocarcinoma	Other		Cell line		Other		Cell line		GSE25146_UNSTIM_VS_HELIOBACTER_PYLORI_LPS_STIM_AGS_CELL	0.011451558	0.928598576	-97.23467862	0.645873112	APPROVED	calcineurin inhibitor	PPP3CA	5530	SIGNATURE	Homo sapiens	IN_VITRO
cyclosporin-a		cyclosporin-a inhibits Other in Lupus erythematosus compared to Other	Other		Other		Other		Other		GSE80183_SLE_GPL11154_PBLs	0.025009346	0.032866618	-97.34678625	0.645873112	APPROVED	calcineurin inhibitor	PPP3CA	5530	SIGNATURE	Homo sapiens	PATIENT
cyclosporin-a		cyclosporin-a inhibits Multiple compared to Multiple in Melanoma	Other		Multiple		Other		Multiple		Tcell_dysfunction_SKCM		0.013699855	-98.0231257	0.645873112	APPROVED	calcineurin inhibitor	PPP3CA	5530	SIGNATURE_DOWN	Homo sapiens	PATIENT
cyclosporin-a		cyclosporin-a inhibits bone marrow Thymic compared to fetal Thymic	Other		Thymic		Other	CL:0000893	Thymic	CL:0000893	GSE25085_FETAL_LIVER_VS_ADULT_BM_SP4_THYMIC_IMPLANT		0.013749423	-98.34017158	0.645873112	APPROVED	calcineurin inhibitor	PPP3CA	5530	SIGNATURE_DOWN	Homo sapiens	IN_VIVO
cyclosporin-a		cyclosporin-a inhibits Cell line in Gastric adenocarcinoma compared to Cell line stimulated with H.pylori and LPS in Gastric adenocarcinoma	Other		Cell line		Other		Cell line		GSE25146_UNSTIM_VS_HELIOBACTER_PYLORI_LPS_STIM_AGS_CELL	0.02209671	0.158964001	-98.35575486	0.645873112	APPROVED	calcineurin inhibitor	PPP3CA	5530	SIGNATURE	Homo sapiens	IN_VITRO
cyclosporin-a		cyclosporin-a inhibits bone marrow Thymic compared to fetal Thymic	Other		Thymic		Other	CL:0000893	Thymic	CL:0000893	GSE25085_FETAL_LIVER_VS_ADULT_BM_SP4_THYMIC_IMPLANT		0.012270921	-98.47071988	0.645873112	APPROVED	calcineurin inhibitor	PPP3CA	5530	SIGNATURE_DOWN	Homo sapiens	IN_VIVO
cyclosporin-a		cyclosporin-a inhibits bone marrow Thymic compared to fetal Thymic	Other		Thymic		Other	CL:0000893	Thymic	CL:0000893	GSE25085_FETAL_LIVER_VS_ADULT_BM_SP4_THYMIC_IMPLANT		0.013699855	-98.47071988	0.645873112	APPROVED	calcineurin inhibitor	PPP3CA	5530	SIGNATURE_DOWN	Homo sapiens	IN_VIVO
cyclosporin-a		cyclosporin-a inhibits Cell line in Gastric adenocarcinoma compared to Cell line stimulated with H.pylori and LPS in Gastric adenocarcinoma	Other		Cell line		Other		Cell line		GSE25146_UNSTIM_VS_HELIOBACTER_PYLORI_LPS_STIM_AGS_CELL	0.013078284	0.792816296	-98.50523169	0.645873112	APPROVED	calcineurin inhibitor	PPP3CA	5530	SIGNATURE	Homo sapiens	IN_VITRO
cyclosporin-a		cyclosporin-a inhibits Multiple compared to Multiple in Melanoma	Other		Multiple		Other		Multiple		Tcell_dysfunction_SKCM		0.024994406	-98.769116	0.645873112	APPROVED	calcineurin inhibitor	PPP3CA	5530	SIGNATURE_DOWN	Homo sapiens	PATIENT
cyclosporin-a		cyclosporin-a inhibits Multiple compared to Multiple in Melanoma	Other		Multiple		Other		Multiple		Tcell_dysfunction_SKCM		0.013975552	-98.80641552	0.645873112	APPROVED	calcineurin inhibitor	PPP3CA	5530	SIGNATURE_DOWN	Homo sapiens	PATIENT
cyclosporin-a		cyclosporin-a inhibits Other in Lupus erythematosus compared to Other	Other		Other		Other		Other		GSE80183_SLE_GPL11154_PBLs	0.024994406		-98.88101455	0.645873112	APPROVED	calcineurin inhibitor	PPP3CA	5530	SIGNATURE_UP	Homo sapiens	PATIENT
cyclosporin-a		cyclosporin-a inhibits Consensus signature compared to Consensus signature	Other		Consensus signature		Other		Consensus signature		TIDE_dysfunctional	0.501642147	0.032144916	-98.91629297	0.645873112	APPROVED	calcineurin inhibitor	PPP3CA	5530	SIGNATURE	Homo sapiens	PATIENT
cyclosporin-a		cyclosporin-a inhibits bone marrow Thymic compared to fetal Thymic	Other		Thymic		Other	CL:0000893	Thymic	CL:0000893	GSE25085_FETAL_LIVER_VS_ADULT_BM_SP4_THYMIC_IMPLANT		0.024994406	-98.99291309	0.645873112	APPROVED	calcineurin inhibitor	PPP3CA	5530	SIGNATURE_DOWN	Homo sapiens	IN_VIVO
cyclosporin-a		cyclosporin-a inhibits Other in Lupus erythematosus compared to Other	Other		Other		Other		Other		GSE80183_SLE_GPL11154_PBLs	0.013749423		-99.03021261	0.645873112	APPROVED	calcineurin inhibitor	PPP3CA	5530	SIGNATURE_UP	Homo sapiens	PATIENT
cyclosporin-a		cyclosporin-a inhibits Other in Lupus erythematosus compared to Other	Other		Other		Other		Other		GSE80183_SLE_GPL11154_PBLs	0.012270921		-99.30995897	0.645873112	APPROVED	calcineurin inhibitor	PPP3CA	5530	SIGNATURE_UP	Homo sapiens	PATIENT
cyclosporin-a		cyclosporin-a inhibits Other in Lupus erythematosus compared to Other	Other		Other		Other		Other		GSE80183_SLE_GPL11154_PBLs	0.013699855		-99.30995897	0.645873112	APPROVED	calcineurin inhibitor	PPP3CA	5530	SIGNATURE_UP	Homo sapiens	PATIENT
cyclosporin-a		cyclosporin-a inhibits Other in Lupus erythematosus compared to Other	Other		Other		Other		Other		GSE80183_SLE_GPL11154_PBLs	0.018664263		-99.36590824	0.645873112	APPROVED	calcineurin inhibitor	PPP3CA	5530	SIGNATURE_UP	Homo sapiens	PATIENT
cyclosporin-a		cyclosporin-a inhibits PBMC compared to PBMC stimulated with CSF3	PBMC	CL:2000001	PBMC	CL:2000001	PBMC	CL:2000001	PBMC	CL:2000001	GSE7400_CTRL_VS_CSF3_IN_VIVO_TREATED_PBMC	0.012270921		-95.00186498	0.645873112	APPROVED	calcineurin inhibitor	PPP3CA	5530	SIGNATURE_UP	Homo sapiens	IN_VIVO
cyclosporin-a		cyclosporin-a inhibits PBMC stimulated with TIV Influenza vaccine (3 days) compared to PBMC stimulated with TIV Influenza vaccine (7 days)	PBMC	CL:2000001	PBMC	CL:2000001	PBMC	CL:2000001	PBMC	CL:2000001	GSE29617_DAY3_VS_DAY7_TIV_FLU_VACCINE_PBMC_2008	0.235593437	0.013413534	-95.32884903	0.645873112	APPROVED	calcineurin inhibitor	PPP3CA	5530	SIGNATURE	Homo sapiens	UNKNOWN
cyclosporin-a		cyclosporin-a inhibits PBMC stimulated with TIV Influenza vaccine compared to PBMC	PBMC	CL:2000001	PBMC	CL:2000001	PBMC	CL:2000001	PBMC	CL:2000001	GSE29614_CTRL_VS_TIV_FLU_VACCINE_PBMC_2007		0.024994406	-95.59865722	0.645873112	APPROVED	calcineurin inhibitor	PPP3CA	5530	SIGNATURE_DOWN	Homo sapiens	UNKNOWN
cyclosporin-a		cyclosporin-a inhibits PBMC stimulated with YF17D Vaccine (21 days) compared to PBMC stimulated with YF17D Vaccine (1 day)	PBMC	CL:2000001	PBMC	CL:2000001	PBMC	CL:2000001	PBMC	CL:2000001	GSE13485_DAY1_VS_DAY21_YF17D_VACCINE_PBMC		0.018653809	-95.78515479	0.645873112	APPROVED	calcineurin inhibitor	PPP3CA	5530	SIGNATURE_DOWN	Homo sapiens	PATIENT
cyclosporin-a		cyclosporin-a inhibits PBMC stimulated with TIV Influenza vaccine (3 days) compared to PBMC stimulated with TIV Influenza vaccine (7 days)	PBMC	CL:2000001	PBMC	CL:2000001	PBMC	CL:2000001	PBMC	CL:2000001	GSE29617_DAY3_VS_DAY7_TIV_FLU_VACCINE_PBMC_2008	0.529681189	0.018556658	-95.92675635	0.645873112	APPROVED	calcineurin inhibitor	PPP3CA	5530	SIGNATURE	Homo sapiens	UNKNOWN
cyclosporin-a		cyclosporin-a inhibits PBMC compared to PBMC in Lupus erythematosus	PBMC	CL:2000001	PBMC	CL:2000001	PBMC	CL:2000001	PBMC	CL:2000001	GSE82221_SLE_GPL10558_GPL13534_PBMCs		0.024994406	-96.0462514	0.645873112	APPROVED	calcineurin inhibitor	PPP3CA	5530	SIGNATURE_DOWN	Homo sapiens	PATIENT
cyclosporin-a		cyclosporin-a inhibits PBMC compared to PBMC stimulated with TIV Influenza vaccine	PBMC	CL:2000001	PBMC	CL:2000001	PBMC	CL:2000001	PBMC	CL:2000001	GSE29614_CTRL_VS_DAY3_TIV_FLU_VACCINE_PBMC	0.861402134	0.39036928	-96.37518685	0.645873112	APPROVED	calcineurin inhibitor	PPP3CA	5530	SIGNATURE	Homo sapiens	UNKNOWN
cyclosporin-a		cyclosporin-a inhibits PBMC stimulated with YF17D Vaccine (21 days) compared to PBMC stimulated with YF17D Vaccine (1 day)	PBMC	CL:2000001	PBMC	CL:2000001	PBMC	CL:2000001	PBMC	CL:2000001	GSE13485_DAY1_VS_DAY21_YF17D_VACCINE_PBMC		0.012270921	-96.56844461	0.645873112	APPROVED	calcineurin inhibitor	PPP3CA	5530	SIGNATURE_DOWN	Homo sapiens	PATIENT
cyclosporin-a		cyclosporin-a inhibits PBMC stimulated with immunosuppressive therapy in Organ Transplant compared to PBMC	PBMC	CL:2000001	PBMC	CL:2000001	PBMC	CL:2000001	PBMC	CL:2000001	GSE22229_RENAL_TRANSPLANT_IMMUNOSUPP_THERAPY_VS_HEALTHY_PBMC	0.02469546	0.084412143	-96.97309417	0.645873112	APPROVED	calcineurin inhibitor	PPP3CA	5530	SIGNATURE	Homo sapiens	PATIENT
cyclosporin-a		cyclosporin-a inhibits PBMC compared to PBMC stimulated with LAIV Influenza vaccine	PBMC	CL:2000001	PBMC	CL:2000001	PBMC	CL:2000001	PBMC	CL:2000001	GSE29615_CTRL_VS_DAY7_LAIV_FLU_VACCINE_PBMC	0.332516775	0.741734554	-97.57100149	0.645873112	APPROVED	calcineurin inhibitor	PPP3CA	5530	SIGNATURE	Homo sapiens	UNKNOWN
cyclosporin-a		cyclosporin-a inhibits PBMC stimulated with immunosuppressive therapy in Organ Transplant compared to PBMC	PBMC	CL:2000001	PBMC	CL:2000001	PBMC	CL:2000001	PBMC	CL:2000001	GSE22229_RENAL_TRANSPLANT_IMMUNOSUPP_THERAPY_VS_HEALTHY_PBMC	0.084497203	0.030441608	-97.79521674	0.645873112	APPROVED	calcineurin inhibitor	PPP3CA	5530	SIGNATURE	Homo sapiens	PATIENT
cyclosporin-a		cyclosporin-a inhibits PBMC stimulated with immunosuppressive therapy in Organ Transplant compared to PBMC	PBMC	CL:2000001	PBMC	CL:2000001	PBMC	CL:2000001	PBMC	CL:2000001	GSE22229_RENAL_TRANSPLANT_IMMUNOSUPP_THERAPY_VS_HEALTHY_PBMC	0.127922392	0.026924644	-97.90732436	0.645873112	APPROVED	calcineurin inhibitor	PPP3CA	5530	SIGNATURE	Homo sapiens	PATIENT
cyclosporin-a		cyclosporin-a inhibits PBMC stimulated with E.coli compared to PBMC stimulated with S.pneumo	PBMC	CL:2000001	PBMC	CL:2000001	PBMC	CL:2000001	PBMC	CL:2000001	GSE6269_E_COLI_VS_STREP_PNEUMO_INF_PBMC	0.2154819	0.017029834	-98.39312407	0.645873112	APPROVED	calcineurin inhibitor	PPP3CA	5530	SIGNATURE	Homo sapiens	PATIENT
cyclosporin-a		cyclosporin-a inhibits PBMC stimulated with immunosuppressive therapy in Organ Transplant compared to PBMC	PBMC	CL:2000001	PBMC	CL:2000001	PBMC	CL:2000001	PBMC	CL:2000001	GSE22229_RENAL_TRANSPLANT_IMMUNOSUPP_THERAPY_VS_HEALTHY_PBMC	0.185954872	0.020226757	-98.50523169	0.645873112	APPROVED	calcineurin inhibitor	PPP3CA	5530	SIGNATURE	Homo sapiens	PATIENT
cyclosporin-a		cyclosporin-a inhibits PBMC stimulated with immunosuppressive therapy in Organ Transplant compared to PBMC	PBMC	CL:2000001	PBMC	CL:2000001	PBMC	CL:2000001	PBMC	CL:2000001	GSE22229_RENAL_TRANSPLANT_IMMUNOSUPP_THERAPY_VS_HEALTHY_PBMC	0.185209537	0.017242712	-98.61733931	0.645873112	APPROVED	calcineurin inhibitor	PPP3CA	5530	SIGNATURE	Homo sapiens	PATIENT
cyclosporin-a		cyclosporin-a inhibits PBMC stimulated with TIV Influenza vaccine (3 days) compared to PBMC stimulated with TIV Influenza vaccine (7 days)	PBMC	CL:2000001	PBMC	CL:2000001	PBMC	CL:2000001	PBMC	CL:2000001	GSE29617_DAY3_VS_DAY7_TIV_FLU_VACCINE_PBMC_2008	0.25656236	0.017029834	-98.69207773	0.645873112	APPROVED	calcineurin inhibitor	PPP3CA	5530	SIGNATURE	Homo sapiens	UNKNOWN
cyclosporin-a		cyclosporin-a inhibits PBMC stimulated with immunosuppressive therapy in Organ Transplant compared to PBMC	PBMC	CL:2000001	PBMC	CL:2000001	PBMC	CL:2000001	PBMC	CL:2000001	GSE22229_RENAL_TRANSPLANT_IMMUNOSUPP_THERAPY_VS_HEALTHY_PBMC	0.045453884	0.013413534	-99.14050822	0.645873112	APPROVED	calcineurin inhibitor	PPP3CA	5530	SIGNATURE	Homo sapiens	PATIENT
cyclosporin-a		cyclosporin-a inhibits T CD8+ compared to T CD8+ stimulated with Overexpression (KLBR1)	T cell	CL:0000084	T CD8+	CL:0000084	T cell	CL:0002437	T CD8+	CL:0002437	GSE33424_CD161_HIGH_VS_INT_CD8_TCELL		0.013699855	-95.09511376	0.645873112	APPROVED	calcineurin inhibitor	PPP3CA	5530	SIGNATURE_DOWN	Homo sapiens	IN_VIVO
cyclosporin-a		cyclosporin-a inhibits activated T CD4+ compared to NK cell	T cell	CL:0000084	T CD4+	CL:0000623	NK cell	CL:0000624	NK cell	CL:0000623	GSE28726_ACT_CD4_TCELL_VS_ACT_NKTCELL	0.017624975	0.056536326	-95.14200299	0.645873112	APPROVED	calcineurin inhibitor	PPP3CA	5530	SIGNATURE	Homo sapiens	IN_VITRO
cyclosporin-a		cyclosporin-a inhibits T cell compared to T cell	T cell	CL:0000084	T cell	CL:0000084	T cell	CL:0000084	T cell	CL:0000084	GSE22886_UNSTIM_VS_STIM_MEMORY_TCELL		0.012270921	-95.16971279	0.645873112	APPROVED	calcineurin inhibitor	PPP3CA	5530	SIGNATURE_DOWN	Homo sapiens	IN_SILICO
cyclosporin-a		cyclosporin-a inhibits T CD4+ stimulated with allergen compared to T CD4+ stimulated with allergen in atopic skin	T cell	CL:0000084	T CD4+	CL:0000084	T cell	CL:0000624	T CD4+	CL:0000624	GSE14908_ATOPIC_VS_NONATOPIC_PATIENT_HDM_STIM_CD4_TCELL		0.018653809	-95.16971279	0.645873112	APPROVED	calcineurin inhibitor	PPP3CA	5530	SIGNATURE_DOWN	Homo sapiens	PATIENT
cyclosporin-a		cyclosporin-a inhibits T CD4+ stimulated with IL4 and anti-IL12 compared to T CD4+	T cell	CL:0000084	T CD4+	CL:0000084	T cell	CL:0000624	T CD4+	CL:0000624	GSE17974_CTRL_VS_ACT_IL4_AND_ANTI_IL12_48H_CD4_TCELL		0.012270921	-95.18836255	0.645873112	APPROVED	calcineurin inhibitor	PPP3CA	5530	SIGNATURE_DOWN	Homo sapiens	EX_VIVO
[truncated: 951 more rows]
